# Supplementary material
Source: MDPI journal article supplement (https://www.mdpi.com/2304-6740/9/5/34)
Supplement: s1 [file s1]

Archive with 16 entries (14 files):
- inorganics-1184848-supplementary/
- inorganics-1184848-supplementary/Comp1-checkcif.pdf
- inorganics-1184848-supplementary/Comp1.cif
- inorganics-1184848-supplementary/Comp2-checkcif.pdf
- inorganics-1184848-supplementary/Comp2.cif
- inorganics-1184848-supplementary/Comp3-checkcif.pdf
- inorganics-1184848-supplementary/Comp3.cif
- inorganics-1184848-supplementary/inorganics-1184848-supplementary.pdf
- inorganics-1184848-supplementary/__MACOSX/
- inorganics-1184848-supplementary/__MACOSX/._Comp1-checkcif.pdf
- inorganics-1184848-supplementary/__MACOSX/._Comp1.cif
- inorganics-1184848-supplementary/__MACOSX/._Comp2-checkcif.pdf
- inorganics-1184848-supplementary/__MACOSX/._Comp2.cif
- inorganics-1184848-supplementary/__MACOSX/._Comp3-checkcif.pdf
- inorganics-1184848-supplementary/__MACOSX/._Comp3.cif
- inorganics-1184848-supplementary/__MACOSX/._Supporting Info.pdf
