# Supplementary material
Source: MDPI journal article supplement (https://www.mdpi.com/2304-6740/9/5/34)
Supplement: s1 [file s1 › inorganics-1184848-supplementary/Comp1.cif]

data_1ver0-13960_acd-20
_audit_creation_date               2019-11-05
_audit_creation_method
;
Olex2 1.2
(compiled 2018.05.29 svn.r3508 for OlexSys, GUI svn.r5506)
;
_shelx_SHELXL_version_number       '2018/3'
_audit_contact_author_address      ?
_audit_contact_author_email        ?
_audit_contact_author_name         ''
_audit_contact_author_phone        ?
_publ_contact_author_id_orcid      ?
_publ_section_references
;
Dolomanov, O.V., Bourhis, L.J., Gildea, R.J, Howard, J.A.K. & Puschmann, H.
 (2009), J. Appl. Cryst. 42, 339-341.

Sheldrick, G.M. (2015). Acta Cryst. A71, 3-8.

Sheldrick, G.M. (2015). Acta Cryst. C71, 3-8.
;
_chemical_name_common              ?
_chemical_name_systematic          ?
_chemical_formula_moiety           'C16 H22 Cl N4 Ru, Cl'
_chemical_formula_sum              'C16 H22 Cl2 N4 Ru'
_chemical_formula_weight           442.34
_chemical_melting_point            ?
_chemical_oxdiff_formula           'C16 H20 Cl1 N4 Ru1'
loop_
  _atom_type_symbol
  _atom_type_description
  _atom_type_scat_dispersion_real
  _atom_type_scat_dispersion_imag
  _atom_type_scat_source
 'C' 'C' 0.0033 0.0016 'International Tables Vol C Tables 4.2.6.8 and 6.1.1.4'
 'H' 'H' 0.0000 0.0000 'International Tables Vol C Tables 4.2.6.8 and 6.1.1.4'
 'Cl' 'Cl' 0.1484 0.1585 'International Tables Vol C Tables 4.2.6.8 and 6.1.1.4'
 'N' 'N' 0.0061 0.0033 'International Tables Vol C Tables 4.2.6.8 and 6.1.1.4'
 'Ru' 'Ru' -1.2594 0.8363
 'International Tables Vol C Tables 4.2.6.8 and 6.1.1.4'

_shelx_space_group_comment
;
The symmetry employed for this shelxl refinement is uniquely defined
by the following loop, which should always be used as a source of
symmetry information in preference to the above space-group names.
They are only intended as comments.
;
_space_group_crystal_system        'monoclinic'
_space_group_IT_number             14
_space_group_name_H-M_alt          'P 1 21/n 1'
_space_group_name_Hall             '-P 2yn'
loop_
  _space_group_symop_operation_xyz
 'x, y, z'
 '-x+1/2, y+1/2, -z+1/2'
 '-x, -y, -z'
 'x-1/2, -y-1/2, z-1/2'

_cell_length_a                     9.3972(2)
_cell_length_b                     17.3629(3)
_cell_length_c                     12.9511(3)
_cell_angle_alpha                  90
_cell_angle_beta                   97.019(2)
_cell_angle_gamma                  90
_cell_volume                       2097.30(8)
_cell_formula_units_Z              4
_cell_measurement_reflns_used      6284
_cell_measurement_temperature      300.48(10)
_cell_measurement_theta_max        32.1080
_cell_measurement_theta_min        3.0790


_shelx_estimated_absorpt_T_max     ?
_shelx_estimated_absorpt_T_min     ?
_exptl_absorpt_coefficient_mu      1.006
_exptl_absorpt_correction_T_max    1.00000
_exptl_absorpt_correction_T_min    0.99283
_exptl_absorpt_correction_type     multi-scan
_exptl_absorpt_process_details
;
CrysAlisPro, Agilent Technologies,
Version 1.171.36.32 (release 02-08-2013 CrysAlis171 .NET)
(compiled Aug  2 2013,16:46:58)
Empirical absorption correction using spherical harmonics,
 implemented in SCALE3 ABSPACK scaling algorithm.
;
_exptl_crystal_density_diffrn      1.401
_exptl_crystal_density_meas        ?
_exptl_crystal_density_method      ?
_exptl_crystal_description         'block'
_exptl_crystal_colour              yellow
_exptl_crystal_F_000               896
_exptl_crystal_size_max            0.100
_exptl_crystal_size_mid            0.050
_exptl_crystal_size_min            0.010
_exptl_transmission_factor_max     ?
_exptl_transmission_factor_min     ?
_diffrn_reflns_av_R_equivalents    0.0242
_diffrn_reflns_av_unetI/netI       0.0372
_diffrn_reflns_Laue_measured_fraction_full  0.998
_diffrn_reflns_Laue_measured_fraction_max  0.882
_diffrn_reflns_limit_h_max         13
_diffrn_reflns_limit_h_min         -14
_diffrn_reflns_limit_k_max         24
_diffrn_reflns_limit_k_min         -25
_diffrn_reflns_limit_l_max         12
_diffrn_reflns_limit_l_min         -19
_diffrn_reflns_number              12806
_diffrn_reflns_point_group_measured_fraction_full  0.998
_diffrn_reflns_point_group_measured_fraction_max  0.882
_diffrn_reflns_theta_full          25.242
_diffrn_reflns_theta_max           32.427
_diffrn_reflns_theta_min           2.831
_diffrn_ambient_temperature        300.48(10)
_diffrn_detector_area_resol_mean   16.2096
_diffrn_measured_fraction_theta_full  0.998
_diffrn_measured_fraction_theta_max  0.882
_diffrn_measurement_details
;
#__ type_ start__ end____ width___ exp.time_
  1 omega  -93.00  -11.00   1.0000   60.0000
omega____ theta____ kappa____ phi______ frames
    -      -25.4311  -57.0000 -120.0000 82

#__ type_ start__ end____ width___ exp.time_
  2 omega  -90.00   35.00   1.0000   60.0000
omega____ theta____ kappa____ phi______ frames
    -      -25.4311    0.0000   60.0000 125

#__ type_ start__ end____ width___ exp.time_
  3 omega   62.00  102.00   1.0000   60.0000
omega____ theta____ kappa____ phi______ frames
    -       26.3686  178.0000   90.0000 40
;
_diffrn_measurement_device_type    'Xcalibur, Eos'
_diffrn_measurement_method         '\w scans'
_diffrn_orient_matrix_UB_11        -0.0142908000
_diffrn_orient_matrix_UB_12        0.0152020000
_diffrn_orient_matrix_UB_13        -0.0511038000
_diffrn_orient_matrix_UB_21        -0.0744686000
_diffrn_orient_matrix_UB_22        -0.0003488000
_diffrn_orient_matrix_UB_23        0.0041847000
_diffrn_orient_matrix_UB_31        0.0051202000
_diffrn_orient_matrix_UB_32        0.0379229000
_diffrn_orient_matrix_UB_33        0.0205146000
_diffrn_radiation_monochromator    graphite
_diffrn_radiation_type             MoK\a
_diffrn_radiation_wavelength       0.71073
_diffrn_source                     'Enhance (Mo) X-ray Source'
_reflns_Friedel_coverage           0.000
_reflns_Friedel_fraction_full      .
_reflns_Friedel_fraction_max       .
_reflns_number_gt                  5747
_reflns_number_total               6659
_reflns_odcompleteness_completeness  99.89
_reflns_odcompleteness_iscentric   1
_reflns_odcompleteness_theta       30.01
_reflns_special_details
;
 Reflections were merged by SHELXL according to the crystal
 class for the calculation of statistics and refinement.
 
 Structure factors included contributions from the .fab file.
 
 _reflns_Friedel_fraction is defined as the number of unique
 Friedel pairs measured divided by the number that would be
 possible theoretically, ignoring centric projections and
 systematic absences.
;
_reflns_threshold_expression       'I > 2\s(I)'
_computing_cell_refinement
;
CrysAlisPro, Agilent Technologies,
Version 1.171.36.32 (release 02-08-2013 CrysAlis171 .NET)
(compiled Aug  2 2013,16:46:58)
;
_computing_data_collection
;
CrysAlisPro, Agilent Technologies,
Version 1.171.36.32 (release 02-08-2013 CrysAlis171 .NET)
(compiled Aug  2 2013,16:46:58)
;
_computing_data_reduction
;
CrysAlisPro, Agilent Technologies,
Version 1.171.36.32 (release 02-08-2013 CrysAlis171 .NET)
(compiled Aug  2 2013,16:46:58)
;
_computing_molecular_graphics      'Olex2 (Dolomanov et al., 2009)'
_computing_publication_material    'Olex2 (Dolomanov et al., 2009)'
_computing_structure_refinement    'ShelXL (Sheldrick, 2015)'
_computing_structure_solution      'ShelXT (Sheldrick, 2015)'
_refine_diff_density_max           0.768
_refine_diff_density_min           -0.440
_refine_diff_density_rms           0.079
_refine_ls_extinction_coef         .
_refine_ls_extinction_method       none
_refine_ls_goodness_of_fit_ref     1.032
_refine_ls_hydrogen_treatment      constr
_refine_ls_matrix_type             full
_refine_ls_number_parameters       211
_refine_ls_number_reflns           6659
_refine_ls_number_restraints       0
_refine_ls_R_factor_all            0.0340
_refine_ls_R_factor_gt             0.0274
_refine_ls_restrained_S_all        1.032
_refine_ls_shift/su_max            0.002
_refine_ls_shift/su_mean           0.000
_refine_ls_structure_factor_coef   Fsqd
_refine_ls_weighting_details      
 'w=1/[\s^2^(Fo^2^)+(0.0234P)^2^+0.6145P] where P=(Fo^2^+2Fc^2^)/3'
_refine_ls_weighting_scheme        calc
_refine_ls_wR_factor_gt            0.0600
_refine_ls_wR_factor_ref           0.0624
_refine_special_details            ?
_olex2_refinement_description
;
1. Fixed Uiso
 At 1.2 times of:
  All C(H) groups, All N(H) groups
 At 1.5 times of:
  All C(H,H,H) groups
2.a Ternary CH refined with riding coordinates:
 C00L(H00M)
2.b Aromatic/amide H refined with riding coordinates:
 N006(H006), N007(H007), C008(H008), C00B(H00B), C00C(H00C), C00D(H00D),
 C00E(H00E), C00F(H00F), C00G(H00G), C00H(H00H), C00I(H00I), C00J(H00J)
2.c Idealised Me refined as rotating group:
 C00K(H00A,H00K,H00L), C00M(H00N,H00O,H00P), C00N(H00Q,H00R,H00S)
;
_atom_sites_solution_hydrogens     geom
_atom_sites_solution_primary       dual
_atom_sites_solution_secondary     ?
loop_
  _atom_site_label
  _atom_site_type_symbol
  _atom_site_fract_x
  _atom_site_fract_y
  _atom_site_fract_z
  _atom_site_U_iso_or_equiv
  _atom_site_adp_type
  _atom_site_occupancy
  _atom_site_site_symmetry_order
  _atom_site_calc_flag
  _atom_site_refinement_flags_posn
  _atom_site_refinement_flags_adp
  _atom_site_refinement_flags_occupancy
  _atom_site_disorder_assembly
  _atom_site_disorder_group
 Ru01 Ru 0.24853(2) 0.67412(2) 0.28872(2) 0.01190(4) Uani 1 1 d . . . . .
 Cl02 Cl 0.31916(5) 0.68047(2) 0.47460(3) 0.01933(8) Uani 1 1 d . . . . .
 Cl03 Cl 0.87627(4) 0.88445(2) 0.44191(3) 0.01976(9) Uani 1 1 d . . . . .
 N004 N 0.37019(14) 0.57188(8) 0.28839(11) 0.0141(3) Uani 1 1 d . . . . .
 N005 N 0.44580(15) 0.72743(8) 0.27061(11) 0.0151(3) Uani 1 1 d . . . . .
 N006 N 0.49417(15) 0.47792(8) 0.22962(11) 0.0181(3) Uani 1 1 d . . . . .
 H006 H 0.535345 0.449854 0.187290 0.022 Uiso 1 1 calc R . . . .
 N007 N 0.63826(18) 0.79974(10) 0.29715(13) 0.0269(3) Uani 1 1 d . . . . .
 H007 H 0.702012 0.830212 0.327960 0.032 Uiso 1 1 calc R . . . .
 C008 C 0.04231(18) 0.71977(10) 0.31989(13) 0.0180(3) Uani 1 1 d . . . . .
 H008 H 0.014285 0.737912 0.381880 0.022 Uiso 1 1 calc R . . . .
 C009 C 0.02257(17) 0.64024(10) 0.29492(13) 0.0167(3) Uani 1 1 d . . . . .
 C00A C 0.14758(18) 0.74544(10) 0.15887(14) 0.0184(3) Uani 1 1 d . . . . .
 C00B C 0.10275(18) 0.77197(10) 0.25409(14) 0.0186(3) Uani 1 1 d . . . . .
 H00B H 0.113388 0.823567 0.272699 0.022 Uiso 1 1 calc R . . . .
 C00C C 0.49461(19) 0.46487(10) 0.33397(14) 0.0187(3) Uani 1 1 d . . . . .
 H00C H 0.538808 0.424355 0.372435 0.022 Uiso 1 1 calc R . . . .
 C00D C 0.41819(18) 0.54220(10) 0.20506(13) 0.0170(3) Uani 1 1 d . . . . .
 H00D H 0.401520 0.563060 0.138536 0.020 Uiso 1 1 calc R . . . .
 C00E C 0.07007(17) 0.61493(10) 0.20081(13) 0.0170(3) Uani 1 1 d . . . . .
 H00E H 0.061378 0.563128 0.182865 0.020 Uiso 1 1 calc R . . . .
 C00F C 0.13076(18) 0.66683(10) 0.13303(13) 0.0181(3) Uani 1 1 d . . . . .
 H00F H 0.159494 0.648700 0.071251 0.022 Uiso 1 1 calc R . . . .
 C00G C 0.41724(18) 0.52319(10) 0.37000(13) 0.0170(3) Uani 1 1 d . . . . .
 H00G H 0.398983 0.529304 0.438502 0.020 Uiso 1 1 calc R . . . .
 C00H C 0.5233(2) 0.77249(10) 0.33738(15) 0.0224(4) Uani 1 1 d . . . . .
 H00H H 0.501132 0.783911 0.403740 0.027 Uiso 1 1 calc R . . . .
 C00I C 0.6368(2) 0.77103(12) 0.19958(15) 0.0263(4) Uani 1 1 d . . . . .
 H00I H 0.703549 0.780265 0.153606 0.032 Uiso 1 1 calc R . . . .
 C00J C 0.51732(19) 0.72580(11) 0.18268(14) 0.0223(4) Uani 1 1 d . . . . .
 H00J H 0.488385 0.698318 0.122103 0.027 Uiso 1 1 calc R . . . .
 C00K C 0.2146(2) 0.80024(12) 0.08925(16) 0.0257(4) Uani 1 1 d . . . . .
 H00A H 0.271810 0.837223 0.130927 0.039 Uiso 1 1 calc GR . . . .
 H00K H 0.140710 0.826454 0.044939 0.039 Uiso 1 1 calc GR . . . .
 H00L H 0.274247 0.772074 0.047356 0.039 Uiso 1 1 calc GR . . . .
 C00L C -0.04304(19) 0.58763(11) 0.36917(14) 0.0219(4) Uani 1 1 d . . . . .
 H00M H -0.004164 0.602203 0.440146 0.026 Uiso 1 1 calc R . . . .
 C00M C -0.0090(3) 0.50235(12) 0.35450(19) 0.0366(5) Uani 1 1 d . . . . .
 H00N H -0.049355 0.486093 0.286316 0.055 Uiso 1 1 calc GR . . . .
 H00O H -0.049308 0.472292 0.405944 0.055 Uiso 1 1 calc GR . . . .
 H00P H 0.093067 0.495224 0.362051 0.055 Uiso 1 1 calc GR . . . .
 C00N C -0.2062(2) 0.60050(13) 0.35764(17) 0.0315(5) Uani 1 1 d . . . . .
 H00Q H -0.225801 0.654261 0.365914 0.047 Uiso 1 1 calc GR . . . .
 H00R H -0.246854 0.571470 0.409901 0.047 Uiso 1 1 calc GR . . . .
 H00S H -0.247641 0.583811 0.289923 0.047 Uiso 1 1 calc GR . . . .

loop_
  _atom_site_aniso_label
  _atom_site_aniso_U_11
  _atom_site_aniso_U_22
  _atom_site_aniso_U_33
  _atom_site_aniso_U_23
  _atom_site_aniso_U_13
  _atom_site_aniso_U_12
 Ru01 0.01282(6) 0.01189(6) 0.01095(6) -0.00027(5) 0.00125(4) 0.00185(4)
 Cl02 0.02316(19) 0.0231(2) 0.01178(17) -0.00105(15) 0.00222(14) 0.00405(16)
 Cl03 0.02138(19) 0.0233(2) 0.01459(18) -0.00042(15) 0.00223(15) -0.00755(16)
 N004 0.0148(6) 0.0141(6) 0.0132(6) 0.0004(5) 0.0012(5) 0.0013(5)
 N005 0.0161(6) 0.0151(6) 0.0136(6) -0.0008(5) 0.0005(5) -0.0001(5)
 N006 0.0199(7) 0.0162(7) 0.0185(7) -0.0022(6) 0.0028(6) 0.0044(5)
 N007 0.0278(8) 0.0255(8) 0.0269(9) -0.0031(7) 0.0007(7) -0.0085(7)
 C008 0.0165(7) 0.0204(8) 0.0172(8) -0.0005(7) 0.0031(6) 0.0064(6)
 C009 0.0144(7) 0.0187(8) 0.0168(8) 0.0008(6) 0.0014(6) 0.0006(6)
 C00A 0.0154(7) 0.0227(8) 0.0171(8) 0.0041(7) 0.0015(6) 0.0043(6)
 C00B 0.0195(8) 0.0144(7) 0.0217(8) 0.0013(6) 0.0020(7) 0.0055(6)
 C00C 0.0208(8) 0.0160(8) 0.0184(8) 0.0023(6) -0.0017(6) 0.0016(6)
 C00D 0.0194(8) 0.0157(8) 0.0158(8) 0.0001(6) 0.0018(6) 0.0028(6)
 C00E 0.0142(7) 0.0183(8) 0.0175(8) -0.0012(6) -0.0021(6) 0.0010(6)
 C00F 0.0146(7) 0.0262(9) 0.0128(7) -0.0012(7) -0.0015(6) 0.0029(6)
 C00G 0.0204(8) 0.0168(8) 0.0134(7) 0.0006(6) 0.0002(6) 0.0016(6)
 C00H 0.0250(9) 0.0213(9) 0.0203(9) 0.0007(7) 0.0004(7) -0.0009(7)
 C00I 0.0240(9) 0.0331(10) 0.0227(9) 0.0020(8) 0.0061(7) -0.0028(8)
 C00J 0.0238(9) 0.0251(9) 0.0183(8) -0.0006(7) 0.0034(7) -0.0025(7)
 C00K 0.0250(9) 0.0277(9) 0.0245(9) 0.0103(8) 0.0034(7) 0.0030(8)
 C00L 0.0220(8) 0.0242(9) 0.0199(8) 0.0023(7) 0.0047(7) -0.0033(7)
 C00M 0.0465(13) 0.0268(10) 0.0381(12) 0.0115(9) 0.0123(10) -0.0020(9)
 C00N 0.0222(9) 0.0421(12) 0.0321(11) 0.0003(9) 0.0107(8) -0.0082(8)

_geom_special_details
;
 All esds (except the esd in the dihedral angle between two l.s. planes)
 are estimated using the full covariance matrix.  The cell esds are taken
 into account individually in the estimation of esds in distances, angles
 and torsion angles; correlations between esds in cell parameters are only
 used when they are defined by crystal symmetry.  An approximate (isotropic)
 treatment of cell esds is used for estimating esds involving l.s. planes.
;
loop_
  _geom_bond_atom_site_label_1
  _geom_bond_atom_site_label_2
  _geom_bond_distance
  _geom_bond_site_symmetry_2
  _geom_bond_publ_flag
 Ru01 Cl02 2.4203(4) . ?
 Ru01 N004 2.1118(13) . ?
 Ru01 N005 2.1106(14) . ?
 Ru01 C008 2.1766(16) . ?
 Ru01 C009 2.2142(16) . ?
 Ru01 C00A 2.2071(17) . ?
 Ru01 C00B 2.1940(16) . ?
 Ru01 C00E 2.1676(17) . ?
 Ru01 C00F 2.1821(17) . ?
 N004 C00D 1.324(2) . ?
 N004 C00G 1.383(2) . ?
 N005 C00H 1.318(2) . ?
 N005 C00J 1.392(2) . ?
 N006 C00C 1.370(2) . ?
 N006 C00D 1.342(2) . ?
 N007 C00H 1.342(2) . ?
 N007 C00I 1.357(3) . ?
 C008 C009 1.425(2) . ?
 C008 C00B 1.410(2) . ?
 C009 C00E 1.418(2) . ?
 C009 C00L 1.511(2) . ?
 C00A C00B 1.427(2) . ?
 C00A C00F 1.410(2) . ?
 C00A C00K 1.501(2) . ?
 C00C C00G 1.362(2) . ?
 C00E C00F 1.425(2) . ?
 C00I C00J 1.366(3) . ?
 C00L C00M 1.532(3) . ?
 C00L C00N 1.538(3) . ?

loop_
  _geom_angle_atom_site_label_1
  _geom_angle_atom_site_label_2
  _geom_angle_atom_site_label_3
  _geom_angle
  _geom_angle_site_symmetry_1
  _geom_angle_site_symmetry_3
  _geom_angle_publ_flag
 N004 Ru01 Cl02 87.57(4) . . ?
 N004 Ru01 C008 143.22(6) . . ?
 N004 Ru01 C009 107.37(6) . . ?
 N004 Ru01 C00A 130.73(6) . . ?
 N004 Ru01 C00B 167.20(6) . . ?
 N004 Ru01 C00E 89.12(6) . . ?
 N004 Ru01 C00F 99.38(6) . . ?
 N005 Ru01 Cl02 87.29(4) . . ?
 N005 Ru01 N004 83.41(5) . . ?
 N005 Ru01 C008 132.45(6) . . ?
 N005 Ru01 C009 168.45(6) . . ?
 N005 Ru01 C00A 88.33(6) . . ?
 N005 Ru01 C00B 99.95(6) . . ?
 N005 Ru01 C00E 141.56(6) . . ?
 N005 Ru01 C00F 106.02(6) . . ?
 C008 Ru01 Cl02 86.62(5) . . ?
 C008 Ru01 C009 37.87(6) . . ?
 C008 Ru01 C00A 68.13(6) . . ?
 C008 Ru01 C00B 37.64(6) . . ?
 C008 Ru01 C00F 80.21(6) . . ?
 C009 Ru01 Cl02 97.10(5) . . ?
 C00A Ru01 Cl02 140.57(5) . . ?
 C00A Ru01 C009 81.48(6) . . ?
 C00B Ru01 Cl02 104.87(5) . . ?
 C00B Ru01 C009 68.63(6) . . ?
 C00B Ru01 C00A 37.85(6) . . ?
 C00E Ru01 Cl02 130.13(5) . . ?
 C00E Ru01 C008 67.72(6) . . ?
 C00E Ru01 C009 37.75(6) . . ?
 C00E Ru01 C00A 68.46(7) . . ?
 C00E Ru01 C00B 80.57(6) . . ?
 C00E Ru01 C00F 38.24(6) . . ?
 C00F Ru01 Cl02 165.53(5) . . ?
 C00F Ru01 C009 68.76(6) . . ?
 C00F Ru01 C00A 37.46(6) . . ?
 C00F Ru01 C00B 67.82(7) . . ?
 C00D N004 Ru01 124.56(11) . . ?
 C00D N004 C00G 106.03(13) . . ?
 C00G N004 Ru01 129.41(11) . . ?
 C00H N005 Ru01 127.57(12) . . ?
 C00H N005 C00J 105.42(14) . . ?
 C00J N005 Ru01 126.92(11) . . ?
 C00D N006 C00C 107.99(14) . . ?
 C00H N007 C00I 108.36(17) . . ?
 C009 C008 Ru01 72.50(9) . . ?
 C00B C008 Ru01 71.85(9) . . ?
 C00B C008 C009 122.45(15) . . ?
 C008 C009 Ru01 69.63(9) . . ?
 C008 C009 C00L 119.55(15) . . ?
 C00E C009 Ru01 69.35(9) . . ?
 C00E C009 C008 116.70(15) . . ?
 C00E C009 C00L 123.73(16) . . ?
 C00L C009 Ru01 130.64(12) . . ?
 C00B C00A Ru01 70.58(10) . . ?
 C00B C00A C00K 120.28(16) . . ?
 C00F C00A Ru01 70.31(10) . . ?
 C00F C00A C00B 118.77(15) . . ?
 C00F C00A C00K 120.94(16) . . ?
 C00K C00A Ru01 129.81(13) . . ?
 C008 C00B Ru01 70.51(10) . . ?
 C008 C00B C00A 119.86(16) . . ?
 C00A C00B Ru01 71.58(9) . . ?
 C00G C00C N006 106.12(15) . . ?
 N004 C00D N006 110.78(15) . . ?
 C009 C00E Ru01 72.91(10) . . ?
 C009 C00E C00F 121.68(16) . . ?
 C00F C00E Ru01 71.43(10) . . ?
 C00A C00F Ru01 72.23(10) . . ?
 C00A C00F C00E 120.52(15) . . ?
 C00E C00F Ru01 70.33(10) . . ?
 C00C C00G N004 109.07(15) . . ?
 N005 C00H N007 111.17(17) . . ?
 N007 C00I C00J 105.96(16) . . ?
 C00I C00J N005 109.08(16) . . ?
 C009 C00L C00M 113.43(15) . . ?
 C009 C00L C00N 109.25(16) . . ?
 C00M C00L C00N 110.45(17) . . ?

_smtbx_masks_special_details       ?
loop_
  _smtbx_masks_void_nr
  _smtbx_masks_void_average_x
  _smtbx_masks_void_average_y
  _smtbx_masks_void_average_z
  _smtbx_masks_void_volume
  _smtbx_masks_void_count_electrons
  _smtbx_masks_void_content
 1 0.000 0.500 0.000 183.5 42.2 ?
 2 0.500 0.000 0.500 183.5 42.2 ?

_shelx_res_file
;
TITL 1ver0-13960_acd-20_a.res in P2(1)/n
    1ver0-13960_acd-20.res
    created by SHELXL-2018/3 at 15:12:46 on 05-Nov-2019
REM Old TITL
REM SHELXT solution in P2(1)/n: R1 0.066, Rweak 0.006, Alpha 0.026
REM <I/s> 0.744 for 154 systematic absences, Orientation as input
REM Formula found by SHELXT: C20 N2 Cl2 Ru O
CELL 0.71073 9.3972 17.3629 12.9511 90 97.019 90
ZERR 4 0.0002 0.0003 0.0003 0 0.002 0
LATT 1
SYMM 0.5-X,0.5+Y,0.5-Z
SFAC C H Cl N Ru
UNIT 64 88 8 16 4

L.S. 99
PLAN  10
BOND
list 4
fmap 2 53
ABIN
ACTA
OMIT 3 0 1
OMIT -1 1 1
OMIT -5 0 7
REM <olex2.extras>
REM <HklSrc "%.\\1ver0-13960_ACD-20.hkl">
REM </olex2.extras>

WGHT    0.023400    0.614500
FVAR       0.41597
RU01  5    0.248528    0.674125    0.288720    11.00000    0.01282    0.01189 =
         0.01095   -0.00027    0.00125    0.00185
CL02  3    0.319157    0.680466    0.474603    11.00000    0.02316    0.02308 =
         0.01178   -0.00105    0.00222    0.00405
CL03  3    0.876268    0.884447    0.441911    11.00000    0.02138    0.02330 =
         0.01459   -0.00042    0.00223   -0.00755
N004  4    0.370191    0.571880    0.288392    11.00000    0.01476    0.01408 =
         0.01322    0.00037    0.00120    0.00134
N005  4    0.445801    0.727427    0.270608    11.00000    0.01611    0.01514 =
         0.01358   -0.00083    0.00045   -0.00007
N006  4    0.494168    0.477919    0.229623    11.00000    0.01985    0.01623 =
         0.01848   -0.00215    0.00281    0.00437
AFIX  43
H006  2    0.535345    0.449854    0.187290    11.00000   -1.20000
AFIX   0
N007  4    0.638259    0.799741    0.297152    11.00000    0.02778    0.02553 =
         0.02687   -0.00306    0.00067   -0.00847
AFIX  43
H007  2    0.702012    0.830212    0.327960    11.00000   -1.20000
AFIX   0
C008  1    0.042310    0.719766    0.319888    11.00000    0.01651    0.02039 =
         0.01725   -0.00048    0.00311    0.00636
AFIX  43
H008  2    0.014285    0.737912    0.381880    11.00000   -1.20000
AFIX   0
C009  1    0.022573    0.640238    0.294922    11.00000    0.01445    0.01874 =
         0.01677    0.00082    0.00138    0.00057
C00A  1    0.147577    0.745441    0.158871    11.00000    0.01538    0.02268 =
         0.01712    0.00414    0.00147    0.00425
C00B  1    0.102753    0.771966    0.254090    11.00000    0.01955    0.01437 =
         0.02174    0.00125    0.00196    0.00550
AFIX  43
H00B  2    0.113388    0.823567    0.272699    11.00000   -1.20000
AFIX   0
C00C  1    0.494608    0.464865    0.333967    11.00000    0.02075    0.01602 =
         0.01840    0.00229   -0.00171    0.00159
AFIX  43
H00C  2    0.538808    0.424355    0.372435    11.00000   -1.20000
AFIX   0
C00D  1    0.418188    0.542201    0.205055    11.00000    0.01938    0.01569 =
         0.01581    0.00011    0.00184    0.00283
AFIX  43
H00D  2    0.401520    0.563060    0.138536    11.00000   -1.20000
AFIX   0
C00E  1    0.070065    0.614926    0.200806    11.00000    0.01420    0.01834 =
         0.01749   -0.00115   -0.00215    0.00100
AFIX  43
H00E  2    0.061378    0.563128    0.182865    11.00000   -1.20000
AFIX   0
C00F  1    0.130755    0.666829    0.133026    11.00000    0.01463    0.02616 =
         0.01278   -0.00123   -0.00153    0.00287
AFIX  43
H00F  2    0.159494    0.648700    0.071251    11.00000   -1.20000
AFIX   0
C00G  1    0.417244    0.523193    0.370004    11.00000    0.02040    0.01683 =
         0.01337    0.00059    0.00022    0.00160
AFIX  43
H00G  2    0.398983    0.529304    0.438502    11.00000   -1.20000
AFIX   0
C00H  1    0.523264    0.772485    0.337381    11.00000    0.02500    0.02133 =
         0.02035    0.00071    0.00045   -0.00091
AFIX  43
H00H  2    0.501132    0.783911    0.403740    11.00000   -1.20000
AFIX   0
C00I  1    0.636806    0.771030    0.199582    11.00000    0.02397    0.03311 =
         0.02266    0.00203    0.00610   -0.00278
AFIX  43
H00I  2    0.703549    0.780265    0.153606    11.00000   -1.20000
AFIX   0
C00J  1    0.517317    0.725800    0.182676    11.00000    0.02383    0.02506 =
         0.01826   -0.00061    0.00339   -0.00245
AFIX  43
H00J  2    0.488385    0.698318    0.122103    11.00000   -1.20000
AFIX   0
C00K  1    0.214631    0.800238    0.089247    11.00000    0.02497    0.02765 =
         0.02447    0.01029    0.00337    0.00299
AFIX 137
H00A  2    0.271810    0.837223    0.130927    11.00000   -1.50000
H00K  2    0.140710    0.826454    0.044939    11.00000   -1.50000
H00L  2    0.274247    0.772074    0.047356    11.00000   -1.50000
AFIX   0
C00L  1   -0.043043    0.587628    0.369171    11.00000    0.02198    0.02421 =
         0.01992    0.00233    0.00466   -0.00328
AFIX  13
H00M  2   -0.004164    0.602203    0.440146    11.00000   -1.20000
AFIX   0
C00M  1   -0.008982    0.502353    0.354502    11.00000    0.04651    0.02680 =
         0.03813    0.01148    0.01232   -0.00196
AFIX 137
H00N  2   -0.049355    0.486093    0.286316    11.00000   -1.50000
H00O  2   -0.049308    0.472292    0.405944    11.00000   -1.50000
H00P  2    0.093067    0.495224    0.362051    11.00000   -1.50000
AFIX   0
C00N  1   -0.206164    0.600502    0.357644    11.00000    0.02216    0.04211 =
         0.03214    0.00034    0.01068   -0.00821
AFIX 137
H00Q  2   -0.225801    0.654261    0.365914    11.00000   -1.50000
H00R  2   -0.246854    0.571470    0.409901    11.00000   -1.50000
H00S  2   -0.247641    0.583811    0.289923    11.00000   -1.50000
AFIX   0
HKLF 4


REM  1ver0-13960_acd-20_a.res in P2(1)/n
REM wR2 = 0.0624, GooF = S = 1.032, Restrained GooF = 1.032 for all data
REM R1 = 0.0274 for 5747 Fo > 4sig(Fo) and 0.0340 for all 6659 data
REM 211 parameters refined using 0 restraints

END

WGHT      0.0236      0.6059

REM Highest difference peak  0.768,  deepest hole -0.440,  1-sigma level  0.079
Q1    1   0.5330  0.7611  0.2577  11.00000  0.05    0.77
Q2    1   0.4747  0.5019  0.3671  11.00000  0.05    0.46
Q3    1   0.6549  0.8181  0.2254  11.00000  0.05    0.44
Q4    1   0.8166  0.9181  0.4349  11.00000  0.05    0.43
Q5    1   0.4070  0.5551  0.3351  11.00000  0.05    0.40
Q6    1   0.3249  0.6610  0.3391  11.00000  0.05    0.39
Q7    1   0.1043  0.6401  0.1624  11.00000  0.05    0.39
Q8    1   0.1085  0.7593  0.1987  11.00000  0.05    0.37
Q9    1   0.5145  0.4782  0.2858  11.00000  0.05    0.37
Q10   1   0.3849  0.5618  0.2442  11.00000  0.05    0.36
;
_shelx_res_checksum                40366
_shelx_hkl_file
;
   0   0  -2 9610.97  164.72
   0   0   2 9999.00  164.70
   0   0   3    0.59    1.23
   0   0  -3    1.28    1.73
   0   0   4 1469.86   27.27
   0   0  -4 1345.56   28.32
   0   0  -5    0.56    2.05
   0   0  -6   82.38    5.60
   0   0  -7   -0.92    2.22
   0   0  -8 1000.81   25.70
   0   0  -9    1.34    3.03
   0   0 -10  270.82   12.68
   0   0 -11    0.08    3.48
   0   0 -12 2108.45   50.18
   0   0 -13    2.29    3.31
   0   0 -14  851.63   29.04
   0   0 -15    0.54    4.15
   0   0 -16  276.86   16.94
   0   0 -17    9.56    5.29
   0   0 -18   12.11    5.62
   0  -1  -2 2392.78   41.43
   0   1  -2 2288.89   42.13
   0  -1  -2 2275.39   40.71
   0   1   2 2383.47   40.75
   0   1   2 2452.29   41.40
   0  -1   2 2446.76   42.15
   0   1   3 2510.48   42.88
   0   1  -3 2441.33   44.66
   0  -1  -3 2428.75   42.78
   0  -1  -3 2389.06   43.85
   0   1   3 2404.15   43.75
   0  -1  -4 1136.95   21.72
   0   1  -4 1049.98   23.46
   0  -1  -4 1107.37   22.96
   0   1   4 1118.92   21.70
   0  -1  -5  482.89   12.92
   0   1  -5  463.64   13.36
   0   1  -6 5384.93   99.46
   0  -1  -6 5621.36   98.85
   0   1  -7   71.90    5.51
   0  -1  -7   65.15    5.08
   0  -1  -8  809.50   21.92
   0   1  -8  833.45   22.83
   0   1  -9  565.51   18.52
   0  -1  -9  533.59   17.69
   0  -1 -10 1228.44   31.93
   0   1 -10 1299.82   33.28
   0   1 -11   15.85    4.37
   0  -1 -11   22.12    4.33
   0   1 -12   77.89    7.91
   0  -1 -12   86.54    7.99
   0  -1 -13   -3.11    3.51
   0   1 -13    1.81    3.84
   0   1 -14    4.66    3.74
   0  -1 -14    8.32    4.38
   0  -1 -15   13.94    5.23
   0   1 -15   -2.86    3.93
   0   1 -16  156.83   12.80
   0  -1 -16  163.31   12.65
   0   1 -17  241.25   16.47
   0  -1 -17  252.02   16.30
   0  -1 -18  144.33   12.86
   0   1 -18  128.19   12.50
   0  -2  -1 6912.04  117.42
   0   2  -1 7011.64  117.23
   0   2   2 2149.09   37.08
   0  -2  -2 2128.11   36.94
   0  -2  -2 2143.61   37.11
   0   2   2 2116.08   36.88
   0  -2   2 2180.86   38.60
   0   2  -2 2077.38   38.61
   0   2  -3 3058.16   56.27
   0   2   3 3142.99   54.77
   0  -2  -3 3114.08   53.88
   0  -2  -3 3082.28   54.74
   0   2   3 3172.00   54.01
   0   2  -4 1594.82   32.23
   0  -2  -4 1607.78   29.47
   0  -2  -4 1551.96   30.64
   0   2   4 1615.92   29.57
   0  -2  -5    3.73    1.35
   0   2  -5    3.49    2.28
   0  -2  -5    2.52    1.81
   0  -2  -6   44.46    3.74
   0  -2  -6   50.21    3.40
   0   2  -6   61.16    5.13
   0  -2  -7  137.26    7.05
   0   2  -7  139.76    7.91
   0   2  -8  188.95    9.70
   0  -2  -8  205.11    9.29
   0  -2  -9   29.54    4.26
   0   2  -9   32.90    4.59
   0  -2 -10  400.85   15.27
   0   2 -10  416.05   16.36
   0  -2 -11 2462.14   54.38
   0   2 -11 2493.64   56.00
   0   2 -12   72.56    7.57
   0  -2 -12   70.84    7.02
   0   2 -13  319.24   16.32
   0  -2 -13  318.16   15.53
   0   2 -14   14.12    4.96
   0  -2 -14   10.21    4.10
   0   2 -15  719.04   28.07
   0  -2 -15  826.78   28.51
   0   2 -16  159.47   13.25
   0  -2 -16  162.72   12.64
   0   2 -17   17.11    6.32
   0  -2 -17   13.89    5.50
   0   2 -18   -3.02    4.98
   0  -2 -18    3.93    3.93
   0   3   0    1.10    1.29
   0  -3   0    2.40    1.07
   0   3   1  294.71    7.56
   0  -3  -1  290.28    7.48
   0   3  -1  299.76    7.07
   0  -3   1  293.01    6.99
   0  -3  -2 1069.43   20.35
   0  -3   2 1159.34   21.93
   0   3  -2 1097.46   21.91
   0  -3  -2 1112.10   19.66
   0   3  -3   81.23    4.50
   0   3   3   81.23    3.08
   0  -3  -3   83.12    3.05
   0  -3  -3   75.84    3.16
   0   3   4  648.98   13.47
   0   3  -4  651.29   16.19
   0  -3  -4  633.73   14.20
   0  -3  -4  633.53   13.43
   0  -3  -5 4937.50   84.63
   0  -3  -5 4752.29   86.14
   0   3  -5 5066.15   88.81
   0   3   5 4841.18   84.77
   0  -3  -6  127.71    6.08
   0  -3  -6  134.68    5.24
   0   3  -6  114.13    6.85
   0  -3  -7 2448.31   45.41
   0  -3  -7 2379.36   47.69
   0   3  -7 2394.13   50.13
   0   3  -8   26.56    4.24
   0  -3  -8   30.37    3.73
   0   3  -9 2158.68   48.27
   0  -3  -9 2160.92   46.02
   0   3 -10   44.23    6.04
   0  -3 -10   55.20    5.64
   0   3 -11   98.38    8.62
   0  -3 -11  105.27    7.77
   0   3 -12  121.52    9.68
   0  -3 -12  122.35    9.05
   0  -3 -13    7.10    3.57
   0   3 -13   12.72    4.62
   0   3 -14  117.83   10.34
   0  -3 -14  101.88    9.19
   0  -3 -15   -2.66    3.45
   0   3 -15   10.38    5.13
   0  -3 -16    0.54    3.85
   0   3 -16    3.46    4.59
   0  -3 -17  723.21   28.28
   0   3 -17  684.89   29.35
   0  -3 -18   10.80    4.79
   0   3 -18   18.14    6.01
   0   4   0   12.04    1.10
   0   4   0   16.32    2.25
   0   4  -1 2099.02   37.64
   0   4   1 2109.58   38.79
   0   4  -2 1789.37   33.74
   0  -4  -3  523.15   10.78
   0   4  -3  530.23   13.42
   0  -4  -3  515.60   11.23
   0   4   4  205.35    5.84
   0  -4  -4  197.32    5.90
   0   4  -4  211.03    8.19
   0  -4  -4  196.56    6.03
   0   4   5  832.05   17.08
   0   4  -5  796.23   20.47
   0  -4  -5  799.71   18.03
   0  -4  -5  839.22   17.19
   0   4  -6  158.46    8.18
   0  -4  -6  153.29    5.67
   0  -4  -6  157.45    6.59
   0  -4  -7  442.09   13.44
   0  -4  -7  476.54   12.13
   0   4  -7  483.96   15.95
   0   4  -8  296.21   12.62
   0  -4  -8  273.58    9.06
   0  -4  -8  289.00   10.85
   0   4  -9   14.58    3.71
   0  -4  -9   20.68    3.41
   0  -4 -10   27.89    3.83
   0   4 -10   22.26    4.51
   0   4 -11  840.53   26.52
   0  -4 -11  794.09   23.82
   0   4 -12  565.73   22.30
   0  -4 -12  591.60   20.47
   0   4 -13  160.82   11.70
   0  -4 -13  190.34   11.64
   0  -4 -14  199.91   12.38
   0   4 -14  197.46   13.75
   0  -4 -15  409.28   18.88
   0   4 -15  439.31   21.28
   0  -4 -16   -2.95    3.92
   0   4 -16    3.22    5.09
   0  -4 -17   77.52    9.11
   0   4 -17   69.57    9.36
   0   4 -18    4.19    4.40
   0   5   0    4.34    1.98
   0   5   0    6.58    1.04
   0   5   1 3881.28   69.68
   0   5  -1 3929.71   67.96
   0   5  -2  347.36    9.52
   0  -5  -3  100.83    3.00
   0  -5  -3   91.48    3.85
   0   5  -3   93.94    4.94
   0   5  -4  864.55   20.86
   0  -5  -4  890.73   17.42
   0  -5  -4  855.34   17.89
   0   5  -5  976.70   23.76
   0  -5  -5  981.51   20.47
   0  -5  -5  996.16   20.14
   0  -5  -6 2842.44   51.46
   0  -5  -6 2804.07   52.68
   0   5  -6 2880.46   56.82
   0  -5  -7 1182.86   26.18
   0  -5  -7 1191.66   24.50
   0   5  -7 1191.15   29.66
   0  -5  -8  176.44    7.97
   0   5  -8  187.62   10.05
   0  -5  -8  160.06    6.55
   0   5  -9   28.28    4.77
   0  -5  -9   39.42    4.24
   0   5 -10   72.01    7.34
   0  -5 -10   80.77    6.13
   0  -5 -11  174.95    9.75
   0   5 -11  178.58   11.53
   0  -5 -12   13.82    3.68
   0   5 -12   12.03    4.19
   0   5 -13   23.50    5.05
   0  -5 -13   34.14    5.04
   0   5 -14   33.49    6.50
   0  -5 -14   30.50    5.42
   0   5 -15   21.17    5.93
   0  -5 -15   33.24    5.78
   0   5 -16  152.79   13.42
   0  -5 -16  187.61   12.83
   0   5 -17  115.89   12.08
   0   6   0  832.28   19.40
   0   6   0  871.98   16.38
   0   6  -1   -0.10    2.13
   0   6   1   -0.69    1.81
   0   6  -1    2.05    1.35
   0   6  -2  821.03   18.11
   0   6  -3   49.66    3.87
   0  -6  -4  983.96   18.86
   0  -6  -4  970.18   20.18
   0   6  -4 1026.28   23.29
   0  -6  -5  344.91    9.05
   0  -6  -5  349.23    9.39
   0   6  -5  335.28   12.04
   0  -6  -6    1.84    1.51
   0  -6  -6    2.55    1.26
   0   6  -6    0.24    2.61
   0   6  -7  166.94    9.33
   0  -6  -7  172.15    6.51
   0  -6  -7  184.47    7.31
   0  -6  -8    1.10    1.67
   0  -6  -8   -0.85    1.25
   0   6  -8    0.38    3.08
   0  -6  -9    4.11    1.75
   0  -6  -9    3.41    1.99
   0   6  -9    1.30    3.18
   0  -6 -10  905.94   23.96
   0   6 -10  857.41   27.02
   0   6 -11   44.29    6.23
   0  -6 -11   49.60    5.19
   0  -6 -12  910.94   26.23
   0   6 -12  905.31   29.87
   0  -6 -13  204.78   11.40
   0   6 -13  164.61   12.39
   0   6 -14  379.38   19.71
   0  -6 -14  412.72   17.52
   0  -6 -15    4.94    3.50
   0   6 -15    0.75    4.40
   0   6 -16  492.95   24.31
   0   6 -17    5.96    4.56
   0   7   0    4.19    2.22
   0   7   0    4.43    1.07
   0   7   1   26.06    3.20
   0   7  -1   20.03    2.07
   0   7  -1   21.91    3.25
   0   7  -2  114.59    5.26
   0   7   2  114.89    6.02
   0   7  -3  125.60    6.08
   0  -7  -4 2020.59   38.69
   0  -7  -4 2050.88   35.81
   0   7  -4 2061.26   41.64
   0  -7  -5   71.27    3.28
   0   7  -5   71.34    5.48
   0  -7  -5   68.41    3.79
   0  -7  -6 2931.41   53.65
   0   7  -6 3030.94   59.57
   0  -7  -6 2935.20   54.00
   0  -7  -7   28.09    2.88
   0  -7  -7   26.05    2.62
   0   7  -7   29.15    4.71
   0  -7  -8  752.33   19.18
   0   7  -8  810.07   23.80
   0  -7  -8  763.30   17.96
   0   7  -9    1.68    3.57
   0  -7  -9    2.55    2.00
   0  -7  -9    2.93    1.72
   0  -7 -10 1333.54   27.88
   0  -7 -10 1268.41   30.62
   0   7 -10 1240.87   34.97
   0  -7 -11    2.50    2.27
   0   7 -11    1.17    3.71
   0  -7 -12  175.79    9.81
   0   7 -12  187.70   12.66
   0   7 -13    5.31    4.59
   0  -7 -13   10.10    3.55
   0   7 -14   25.39    6.02
   0  -7 -14   12.84    3.72
   0   7 -15    6.19    4.91
   0   7 -16  455.93   23.65
   0   7 -17   49.18    9.20
   0   8   0 1582.59   33.26
   0   8   0 1572.90   28.84
   0   8  -1  714.12   18.72
   0   8   1  730.37   18.74
   0   8  -1  725.32   15.90
   0   8   2  271.84   10.00
   0   8  -2  261.28    8.60
   0   8  -3   43.24    3.73
   0   8  -4  786.78   20.08
   0  -8  -4  776.66   17.96
   0  -8  -5  352.14   10.18
   0   8  -5  349.47   12.72
   0  -8  -5  351.24    8.14
   0   8  -6   11.17    3.20
   0  -8  -6   15.52    2.09
   0  -8  -6   21.03    2.02
   0   8  -7   30.40    4.50
   0  -8  -7   28.79    2.63
   0  -8  -7   30.60    2.79
   0  -8  -8    3.63    1.67
   0   8  -8    2.55    3.36
   0  -8  -8    0.92    1.29
   0   8  -9  119.33    9.00
   0  -8  -9  130.33    6.75
   0  -8  -9  127.49    5.86
   0   8 -10 1007.41   30.65
   0  -8 -10 1041.11   25.56
   0   8 -11  397.12   18.33
   0  -8 -11  412.94   14.76
   0   8 -12  639.37   24.64
   0  -8 -12  640.66   20.28
   0   8 -13  418.50   20.25
   0   8 -14  138.46   12.09
   0   8 -15  158.16   13.51
   0   8 -16  501.62   25.01
   0   8 -17   12.54    6.55
   0   9   0    4.22    1.19
   0   9   0    3.47    2.67
   0   9  -1  568.83   13.51
   0   9  -1  589.86   16.92
   0   9   1  573.00   16.54
   0   9  -2  433.83   14.16
   0   9  -2  416.68   11.86
   0   9   2  437.74   14.05
   0   9  -3   25.99    2.99
   0   9  -4  718.47   19.25
   0   9  -5 2133.62   44.00
   0  -9  -5 2016.80   35.60
   0  -9  -5 2131.10   40.20
   0  -9  -6  611.80   12.98
   0  -9  -6  590.66   15.31
   0   9  -6  571.72   18.53
   0  -9  -7 1967.61   36.59
   0  -9  -7 1880.77   37.81
   0   9  -7 1906.91   43.76
   0  -9  -8    2.77    1.40
   0   9  -8    2.51    2.78
   0  -9  -8    0.59    1.46
   0  -9  -9  154.89    6.58
   0   9  -9  159.65   10.50
   0  -9  -9  150.88    7.07
   0  -9 -10  165.66    7.97
   0   9 -10  172.06   11.36
   0   9 -11  161.81   11.76
   0   9 -12   43.95    6.91
   0   9 -13   13.76    5.53
   0   9 -14   -1.24    4.01
   0   9 -15   34.55    7.54
   0   9 -16  146.28   13.59
   0  10   0  164.87    5.22
   0  10   0  176.88    8.50
   0  10   1 2556.34   44.40
   0  10  -1 2710.53   53.22
   0  10  -1 2649.09   48.02
   0  10   1 2715.55   52.99
   0  10   2  297.64   11.81
   0  10  -2  290.21   11.75
   0  10  -2  309.55    9.88
   0  10  -3  450.51   13.51
   0  10  -4    3.25    2.12
   0 -10  -5 1141.82   25.13
   0  10  -5 1113.13   27.85
   0 -10  -6   10.07    0.97
   0 -10  -6   11.64    1.96
   0  10  -6   15.57    3.99
   0 -10  -7  214.44    8.11
   0  10  -7  217.40   11.19
   0 -10  -7  217.10    6.51
   0  10  -8    3.84    3.16
   0 -10  -8    0.97    1.25
   0 -10  -8    1.77    1.38
   0  10  -9   27.46    5.08
   0  10 -10   38.36    6.14
   0  10 -11  511.79   21.54
   0  10 -12   11.22    4.99
   0  10 -13  540.99   23.95
   0  10 -14   -2.34    4.64
   0  10 -15  437.61   22.91
   0  10 -16    1.30    4.58
   0  11   0   -1.33    2.25
   0  11   0    0.33    0.88
   0  11   1  639.19   18.95
   0  11   1  601.81   11.49
   0  11   1  587.51   11.50
   0  11  -1  657.46   14.92
   0  11  -1  651.04   19.14
   0  11  -2   -0.86    1.59
   0  11  -2   -1.67    2.96
   0  11   2    0.40    2.76
   0  11  -3  331.76   11.27
   0  11  -3  311.71   13.08
   0  11  -4  540.83   16.36
   0 -11  -5  938.81   22.34
   0  11  -5  905.97   24.50
   0 -11  -6  291.51   10.30
   0  11  -6  312.51   13.03
   0 -11  -7  317.92   10.72
   0  11  -7  324.01   14.12
   0 -11  -8  468.88   13.49
   0  11  -8  460.40   18.00
   0  11  -9  392.53   17.28
   0  11 -10  123.16   10.17
   0  11 -11  144.30   11.28
   0  11 -12  119.64   10.83
   0  11 -13    5.73    4.36
   0  11 -14   29.05    7.30
   0  11 -15   25.57    6.52
   0  11 -16  121.35   12.80
   0  12   0  934.01   18.95
   0  12   0  932.92   25.33
   0  12   1  150.08    8.75
   0  12  -1  144.13    5.90
   0  12  -1  148.17    8.78
   0  12  -2  488.36   17.02
   0  12   2  479.95   16.70
   0  12  -2  465.64   13.36
   0  12  -3   15.03    2.90
   0  12  -3   13.92    3.80
   0  12  -4  158.09    8.16
   0 -12  -5    1.90    1.39
   0  12  -5    1.83    2.32
   0 -12  -6   53.85    4.40
   0  12  -6   50.09    5.36
   0  12  -7   21.68    4.30
   0 -12  -7   29.12    3.18
   0  12  -8   86.93    7.73
   0  12  -9   82.24    8.04
   0  12 -10  158.27   11.41
   0  12 -11  475.68   21.21
   0  12 -12  521.39   23.10
   0  12 -13   14.37    5.20
   0  12 -14  256.30   17.07
   0  12 -15  140.33   13.25
   0  12 -16  289.26   19.57
   0  13   0    9.01    3.84
   0  13   0    2.06    1.02
   0  13  -1    1.70    1.42
   0  13  -1   -3.77    3.39
   0  13  -2  326.13   10.73
   0  13   2  324.36   13.77
   0  13  -2  306.05   13.65
   0  13  -3   49.32    6.01
   0  13  -3   44.86    4.16
   0  13  -4  380.20   13.51
   0  13  -4  363.78   15.52
   0  13  -5   18.02    3.62
   0 -13  -5   18.35    2.85
   0 -13  -6  988.36   24.39
   0  13  -6 1008.01   27.60
   0  13  -7  392.40   16.19
   0 -13  -7  398.32   13.10
   0  13  -8  483.39   19.05
   0  13  -9   -5.31    3.74
   0  13 -10  685.05   25.30
   0  13 -11   48.30    7.39
   0  13 -12    6.38    5.10
   0  13 -13    7.10    5.17
   0  13 -14    0.80    4.81
   0  13 -15  154.69   14.18
   0  14   0 1905.07   44.15
   0  14   0 1886.51   35.02
   0  14   1  316.41   14.14
   0  14  -1  291.97   13.70
   0  14  -1  327.52    9.84
   0  14  -2  120.02    8.67
   0  14   2  111.94    8.34
   0  14  -2  115.34    6.10
   0  14  -3   54.90    6.36
   0  14  -3   55.20    4.69
   0  14  -4  488.88   18.72
   0  14  -4  477.06   15.81
   0  14  -5    6.46    2.84
   0 -14  -5    6.38    2.12
   0 -14  -6    1.37    1.59
   0  14  -6    2.45    2.78
   0  14  -7    0.56    2.96
   0  14  -8   99.92    8.46
   0  14  -9   26.95    5.16
   0  14 -10   79.90    8.49
   0  14 -11   36.58    6.71
   0  14 -12  548.51   24.33
   0  14 -13  214.31   15.44
   0  14 -14  251.13   17.18
   0  14 -15    3.32    4.99
   0  15   0    9.52    3.90
   0  15  -1   60.07    3.89
   0  15   1   61.15    6.65
   0  15  -1   55.91    6.61
   0  15  -2   50.59    4.13
   0  15   2   39.26    5.79
   0  15  -2   44.06    5.84
   0  15  -3  164.67   10.73
   0  15  -3  156.20    7.85
   0  15  -4   84.42    6.38
   0  15  -4   79.30    7.58
   0  15  -5  459.69   16.73
   0 -15  -5  492.11   16.26
   0  15  -5  498.06   19.92
   0  15  -6  842.53   25.26
   0 -15  -6  847.17   23.02
   0  15  -7  264.56   13.45
   0  15  -8   29.49    5.50
   0  15  -9  260.04   14.69
   0  15 -10   53.10    7.65
   0  15 -11   56.62    8.13
   0  15 -12    4.96    5.03
   0  15 -13    8.06    5.43
   0  15 -14   20.30    6.38
   0  16   0   69.13    7.42
   0  16   1  898.86   28.24
   0  16  -1  968.51   28.77
   0  16  -2   76.11    7.54
   0  16   2   79.65    7.75
   0  16  -3  632.72   18.21
   0  16  -3  663.68   23.50
   0  16  -4  106.26    9.33
   0  16  -4   92.02    6.61
   0 -16  -5   76.37    6.19
   0  16  -5   95.50    7.17
   0  16  -5   76.10    8.09
   0  16  -6    7.24    4.48
   0  16  -6    2.94    3.18
   0  16  -7   34.31    5.47
   0  16  -8   34.65    5.74
   0  16  -9  112.14    9.69
   0  16 -10   19.21    5.30
   0  16 -11  775.86   29.24
   0  16 -12   73.52    9.56
   0  16 -13  130.07   12.57
   0  16 -14   10.85    5.38
   0  17   0    2.68    4.41
   0  17   1    8.88    4.23
   0  17  -1   16.92    4.85
   0  17   2    2.08    3.36
   0  17  -2    3.00    4.15
   0  17  -3   87.34    8.66
   0  17  -4    1.64    4.07
   0  17  -4    1.30    2.39
   0  17  -5 1179.83   31.04
   0  17  -5 1235.08   36.33
   0 -17  -5 1192.93   31.07
   0  17  -6    2.99    4.08
   0  17  -6    6.59    3.33
   0  17  -7  459.50   18.53
   0  17  -7  435.90   20.64
   0  17  -8   18.52    5.01
   0  17  -9  740.90   26.79
   0  17 -10   42.94    6.79
   0  17 -11   89.49    9.90
   0  17 -12   40.92    7.47
   0  17 -13    5.52    4.60
   0  17 -14   23.97    7.13
   0  18   0  694.31   25.13
   0  18   1  358.72   17.47
   0  18  -1  371.58   17.75
   0  18  -2  229.40   13.75
   0  18   2  208.15   13.15
   0  18  -3  204.79   13.25
   0  18  -4  124.08   10.39
   0  18  -5   41.97    6.80
   0  18  -6    7.05    4.82
   0  18  -7   40.79    6.90
   0  18  -7   47.44    6.32
   0  18  -8  133.79   11.94
   0  18  -8  124.57    9.96
   0  18  -9   53.77    7.42
   0  18 -10   33.78    6.32
   0  18 -11  360.95   19.63
   0  18 -12   85.58   10.06
   0  18 -13   47.95    8.56
   0  19   0   11.44    4.80
   0  19   1  122.15   10.58
   0  19  -1  102.40    9.65
   0  19   2  413.30   19.30
   0  19  -2  377.50   18.56
   0  19  -3    5.73    4.39
   0  19  -4  155.17   11.96
   0  19  -5  179.05   13.03
   0  19  -6  871.37   31.43
   0  19  -7  112.23   11.02
   0  19  -8  198.22   14.74
   0  19  -9   91.26   10.30
   0  19 -10  144.97   13.32
   0  19 -10  146.45   12.04
   0  19 -11   29.84    6.54
   0  19 -12   58.70    8.64
   0  19 -13   30.40    6.79
   0  20   0 1548.60   43.89
   0  20   1    4.41    4.46
   0  20  -1    8.66    4.73
   0  20  -2  444.66   20.79
   0  20  -3   79.18    9.16
   0  20  -4  464.81   21.75
   0  20  -5   99.59   10.30
   0  20  -6    5.14    4.71
   0  20  -7   10.65    4.93
   0  20  -8   40.35    8.36
   0  20  -9   24.54    6.90
   0  20 -10  126.52   12.62
   0  21   0   13.28    5.87
   0  21   1   28.27    7.06
   0  21  -1   19.84    5.76
   0  21  -2   94.25   10.14
   0  21  -3  114.64   10.97
   0  21  -4  165.56   13.26
   0  21  -5  132.02   11.96
   0  21  -6  397.52   21.23
   0  21  -7   61.76    8.83
   0  21  -8  130.92   12.61
   0  21  -9   96.39   11.07
   0  22   0  169.83   13.49
   0  22  -1  373.79   20.09
   0  22   1  401.98   20.70
   0  22  -2  114.45   11.20
   0  22  -3  284.96   17.60
   0  22  -4  112.14   11.11
   0  22  -5   44.80    7.80
   0  22  -6   28.90    7.11
   0  22  -7    4.68    5.26
   0  22  -8    6.09    5.29
   0  23   0    4.99    5.25
   0  23  -1  101.41   10.85
   0  23   1  100.25   10.70
   0  23  -2    9.08    4.64
   0  23  -3  131.15   12.39
   0  23  -4   22.05    6.50
   0  23  -5  438.16   23.02
   0  23  -6   10.71    5.74
   0  24   0    6.85    5.08
   0  24  -1  448.63   23.36
   0  24  -2   14.59    5.98
   0  24  -3   30.14    6.79
   1   0 -18   -1.14    4.34
   1   0 -17  296.16   17.86
   1   0 -16    2.25    3.92
   1   0 -15  509.24   22.23
   1   0 -14    5.22    4.07
   1   0 -13  119.04    9.67
   1   0 -12    3.87    3.36
   1   0 -11 2165.24   49.81
   1   0 -10    0.34    2.87
   1   0  -9    2.41    2.74
   1   0  -8    5.50    2.97
   1   0  -7  470.85   14.77
   1   0  -6    2.70    2.56
   1   0  -5  594.04   15.36
   1   0  -4    0.18    1.70
   1   0  -3 1946.92   36.29
  -1   0   2   -0.43    0.93
   1   0  -2    0.56    1.38
  -1   0  -1 6921.29  117.08
  -1   0  -2    5.70    1.77
   1   0   2    4.42    1.48
  -1   0  -3 2951.05   53.16
  -1   0  -4    1.71    1.94
  -1   0  -5  504.31   13.62
  -1   0  -5  512.71   14.21
  -1   0  -6    0.34    2.43
  -1   0  -6    6.67    2.27
  -1   0  -7  130.91    7.39
  -1   0  -8    0.07    2.54
  -1   0  -9  191.74   10.22
  -1   0 -10   -2.01    3.17
  -1   0 -11 1701.69   42.04
  -1   0 -12    1.37    3.38
  -1   0 -13  266.86   14.65
  -1   0 -14    4.40    3.96
  -1   0 -15 1649.25   46.28
  -1   0 -16    1.83    4.15
  -1   0 -17   -1.38    3.84
  -1   0 -18    4.76    4.59
   1   1 -18    8.25    5.28
   1  -1 -18    8.49    4.37
   1   1 -17  391.38   20.88
   1  -1 -17  361.88   19.71
   1   1 -16   22.23    5.97
   1  -1 -16   22.15    5.59
   1   1 -15   20.79    5.46
   1  -1 -15   19.73    4.92
   1  -1 -14    7.94    3.97
   1   1 -14   16.10    4.54
   1   1 -13  231.42   13.53
   1  -1 -13  229.57   13.24
   1  -1 -12    5.36    3.41
   1   1 -12   10.21    4.24
   1  -1 -11  557.86   19.50
   1   1 -11  528.36   19.71
   1  -1 -10   39.68    4.93
   1   1 -10   43.52    5.39
   1   1  -9 1409.68   34.11
   1  -1  -9 1370.87   33.29
   1   1  -8  396.05   14.34
   1  -1  -8  411.94   14.03
   1   1  -7 1729.64   38.06
   1  -1  -7 1819.38   37.98
   1   1  -6 1237.33   27.92
   1  -1  -6 1239.58   27.42
   1   1  -5 4632.82   82.28
  -1   1   5 4578.04   78.38
   1  -1  -5 4403.21   81.36
   1  -1  -4  502.09   12.43
   1   1  -4  472.05   12.77
   1   1  -3   34.88    2.93
   1  -1  -3   35.39    2.73
  -1   1   3   39.81    2.71
   1   1  -2  232.31    6.63
  -1   1   2  240.63    6.26
   1  -1  -2  229.87    6.18
  -1  -1   2  257.29    6.80
   1   1  -1  347.17    7.90
   1  -1  -1  349.61    7.65
  -1   1  -1  113.87    3.91
  -1  -1  -1  112.63    3.94
  -1  -1  -2  376.06    9.07
   1   1   2  376.82    9.10
  -1   1  -2  357.12    9.27
   1  -1   2  369.64    9.34
  -1  -1  -3  464.26   11.20
  -1   1  -3  447.40   11.56
  -1   1  -4  542.01   13.88
  -1  -1  -4  545.52   13.41
  -1  -1  -5 4925.18   88.11
  -1   1  -5 4924.41   88.75
  -1  -1  -5 4916.45   87.42
  -1   1  -6 2453.99   49.53
  -1  -1  -6 2507.13   47.95
  -1  -1  -6 2497.82   48.91
  -1  -1  -7 1022.59   24.86
  -1  -1  -7  989.33   23.40
  -1   1  -7  977.00   25.20
  -1   1  -8   77.59    6.24
  -1  -1  -8   82.01    6.12
  -1   1  -9 1428.14   35.32
  -1  -1  -9 1465.67   35.01
  -1  -1 -10  293.82   13.16
  -1   1 -10  277.22   13.30
  -1   1 -11   12.05    3.93
  -1  -1 -11   12.45    3.86
  -1   1 -12   14.33    4.50
  -1  -1 -12    5.49    3.34
  -1  -1 -13   -1.51    3.68
  -1   1 -13   -2.68    3.66
  -1   1 -14   16.47    5.49
  -1  -1 -14   11.45    4.15
  -1   1 -15   47.66    7.17
  -1  -1 -15   56.74    7.85
  -1   1 -16   25.23    6.36
  -1  -1 -16   21.32    5.80
  -1   1 -17  493.30   24.03
  -1  -1 -17  468.24   22.88
  -1  -1 -18  169.15   14.36
  -1   1 -18  195.36   15.32
   1  -2 -19    4.96    4.82
   1  -2 -18    9.14    4.65
   1   2 -18    7.98    4.84
   1  -2 -17   99.51   10.38
   1   2 -17   84.57   10.23
   1   2 -16  126.98   11.77
   1  -2 -16  118.97   10.73
   1   2 -15  120.13   10.80
   1  -2 -15  117.27   10.07
   1  -2 -14  585.80   22.79
   1   2 -14  597.57   23.98
   1  -2 -13    4.36    3.23
   1   2 -13    0.21    3.17
   1   2 -12  707.42   24.56
   1  -2 -12  722.05   23.71
   1  -2 -11    9.45    3.45
   1   2 -11    6.48    3.65
   1   2 -10  362.21   15.15
   1  -2 -10  316.40   13.58
   1   2  -9   71.09    6.42
   1  -2  -9   62.75    5.62
   1  -2  -8  665.65   18.62
   1   2  -8  597.30   18.97
   1  -2  -7   38.91    3.98
   1   2  -7   36.95    4.33
  -1   2   6  312.18    8.07
   1  -2  -6  327.21   10.65
   1   2  -6  310.83   11.26
   1  -2  -5  671.21   16.32
  -1   2   5  680.29   13.69
   1   2  -5  701.58   17.56
   1  -2  -4  783.47   16.97
  -1   2   4  767.42   14.16
   1   2  -4  731.46   17.90
  -1   2   3   27.60    2.19
   1  -2  -3   30.98    2.37
   1   2  -3   24.93    2.82
  -1  -2   2 1795.09   33.18
   1  -2  -2 1735.93   31.99
  -1   2   2 1831.46   32.02
   1   2  -2 1787.00   33.12
  -1   2   1 2386.07   41.26
   1   2  -1 2329.68   41.76
   1  -2  -1 2340.41   41.22
  -1  -2   1 2388.24   41.81
   1  -2  -1 2411.02   41.14
  -1  -2   0 6444.58  110.34
  -1  -2   0 6467.69  110.07
   1  -2   0 6712.49  110.43
   1   2   0 6688.29  110.10
   1   2   0 6384.38  110.29
   1   2   1  985.88   19.14
  -1  -2  -1  956.65   19.10
   1  -2   1  960.43   19.27
  -1  -2  -1 1006.40   18.26
  -1  -2  -2 2499.89   45.47
   1   2   2 2565.10   45.44
  -1  -2  -3   90.66    4.27
  -1  -2  -4 4200.59   74.47
  -1  -2  -5  343.72   10.36
  -1  -2  -5  350.85   10.60
  -1   2  -5  363.50   11.73
  -1   2  -6  259.38   10.47
  -1  -2  -6  269.06    9.72
  -1  -2  -6  268.31    9.10
  -1  -2  -7   29.47    3.33
  -1  -2  -7   22.50    3.27
  -1   2  -7   26.87    3.97
  -1   2  -8  506.19   17.16
  -1  -2  -8  515.09   16.16
  -1  -2  -8  474.49   14.69
  -1   2  -9   32.45    4.71
  -1  -2  -9   23.87    3.86
  -1   2 -10  662.99   22.19
  -1  -2 -10  687.39   21.44
  -1   2 -11  547.43   20.75
  -1  -2 -11  611.45   20.70
  -1   2 -12 1377.83   38.53
  -1  -2 -12 1456.90   37.72
  -1  -2 -13  166.64   11.21
  -1   2 -13  209.25   13.09
  -1   2 -14  340.11   17.89
  -1  -2 -14  354.65   17.23
  -1   2 -15  346.74   18.64
  -1  -2 -15  335.06   17.64
  -1   2 -16  161.39   13.30
  -1  -2 -16  162.73   12.65
  -1  -2 -17   14.45    5.44
  -1   2 -17   12.07    5.44
  -1  -2 -18   31.74    7.17
  -1   2 -18   56.19    9.14
   1  -3 -19    5.55    4.55
   1  -3 -18  293.36   17.80
   1   3 -18  285.21   18.80
   1   3 -17    6.72    5.89
   1  -3 -17    2.32    4.17
   1  -3 -16  257.67   15.46
   1   3 -16  241.33   16.11
   1  -3 -15   88.02    8.88
   1   3 -15   81.75    9.25
   1  -3 -14   36.25    5.91
   1   3 -14   27.50    5.73
   1  -3 -13   18.24    4.26
   1   3 -13   17.26    4.99
   1  -3 -12   33.80    5.17
   1   3 -12   49.59    6.73
   1  -3 -11   11.09    3.49
   1   3 -11   14.76    4.29
   1   3 -10  335.35   14.73
   1  -3 -10  319.45   13.14
   1   3  -9    1.09    2.89
   1  -3  -9    3.69    2.38
   1   3  -8  845.58   23.62
   1  -3  -8  863.43   22.22
  -1   3   7  424.94   10.31
   1  -3  -7  424.27   13.18
   1   3  -7  415.40   14.40
   1   3  -6 4402.24   83.27
   1  -3  -6 4596.01   81.34
  -1   3   6 4488.66   77.33
   1  -3  -5   38.67    3.25
  -1   3   5   42.04    1.92
   1   3  -5   48.34    4.26
   1  -3  -4  286.14    8.18
   1   3  -4  285.80    9.52
   1  -3  -3   90.97    3.66
  -1   3   3   97.21    3.77
   1   3  -3   94.78    4.76
  -1   3   2 7772.47  127.60
   1   3  -2 7552.39  129.24
   1  -3  -2 7602.37  127.64
   1  -3  -1  684.60   13.74
  -1   3   1  672.12   13.08
   1   3  -1  669.91   13.77
   1  -3  -1  666.05   13.05
  -1  -3   1  673.10   13.78
  -1   3   1  681.97   13.73
  -1   3   0  346.39    7.99
   1   3   0  313.51    8.18
   1   3   0  344.66    7.45
  -1  -3   0  330.20    7.41
  -1  -3   0  337.50    8.32
   1   3   1  833.63   15.61
  -1  -3  -1  838.21   17.13
  -1  -3  -1  832.51   15.61
  -1  -3  -1  828.36   17.20
  -1  -3  -2    7.11    1.66
   1   3   2    9.52    1.77
  -1  -3  -3   57.27    3.36
  -1   3  -4  934.36   21.62
  -1  -3  -4  917.94   19.86
  -1  -3  -5  162.48    6.57
  -1   3  -5  152.98    7.58
  -1  -3  -5  182.05    6.84
  -1  -3  -6 6601.62  116.32
  -1   3  -6 6592.53  119.42
  -1  -3  -6 6693.95  117.03
  -1   3  -7    2.31    3.01
  -1  -3  -7    1.83    1.69
  -1  -3  -7    4.77    2.36
  -1   3  -8 1010.78   26.81
  -1  -3  -8  942.77   23.08
  -1  -3  -8  974.38   24.64
  -1   3  -9   -2.14    2.82
  -1  -3  -9    3.65    2.33
  -1  -3  -9   -0.97    1.94
  -1   3 -10 1333.86   35.32
  -1  -3 -10 1342.25   33.49
  -1   3 -11   68.72    7.41
  -1  -3 -11   68.21    6.71
  -1   3 -12   13.50    4.79
  -1  -3 -12   11.12    3.90
  -1  -3 -13   55.09    6.49
  -1   3 -13   42.89    6.65
  -1  -3 -14   12.27    4.47
  -1   3 -14    8.72    4.50
  -1  -3 -15   13.32    4.40
  -1   3 -15    2.23    4.23
  -1   3 -16  271.74   17.29
  -1  -3 -16  276.94   16.36
  -1   3 -17   -3.33    5.20
  -1  -3 -17   -2.43    3.95
  -1   3 -18  270.89   18.58
  -1  -3 -18  253.89   16.73
   1  -4 -18   -2.78    4.30
   1   4 -18    5.90    5.25
   1  -4 -17   46.55    7.25
   1   4 -17   47.78    8.55
   1   4 -16  523.37   24.31
   1  -4 -16  502.04   22.03
   1  -4 -15   79.01    8.29
   1   4 -15   97.19   10.02
   1   4 -14  175.26   12.95
   1  -4 -14  169.37   11.19
   1   4 -13   71.79    8.25
   1  -4 -13   82.68    7.72
   1   4 -12 1131.88   33.61
   1  -4 -12 1134.03   31.17
   1  -4 -11  876.18   25.20
   1   4 -11  879.01   27.60
   1   4 -10  139.49    9.47
   1  -4 -10  135.56    8.19
   1   4  -9    7.20    3.68
   1  -4  -9    1.72    1.98
   1   4  -8  360.18   14.18
   1  -4  -8  358.41   12.40
   1  -4  -7    7.40    2.28
   1   4  -7    5.95    3.14
  -1   4   7    7.69    1.22
   1   4  -6  557.05   16.38
   1  -4  -6  515.19   13.86
  -1   4   6  522.92   10.89
   1  -4  -5  121.05    3.37
   1  -4  -5  122.15    5.23
   1   4  -5  128.96    6.66
   1  -4  -4  562.32   12.75
   1   4  -4  538.29   14.72
   1   4  -3 1824.58   37.30
  -1   4   3 2012.37   35.03
   1  -4  -3 1935.23   34.97
   1  -4  -2 1083.00   19.90
  -1   4   2 1084.53   19.88
   1   4  -2 1038.38   21.75
   1  -4  -1   91.43    3.87
  -1   4   1   89.59    2.98
   1   4  -1   77.68    3.43
  -1  -4   1   88.71    3.60
  -1   4   1   85.68    3.82
   1   4  -1   84.00    4.17
   1   4   0 9128.07  152.80
   1   4   0 8881.17  154.63
  -1   4   0 8990.78  154.16
  -1  -4   0 9276.79  152.73
   1   4   1  433.11   11.04
   1   4   1  447.03    8.96
  -1  -4  -1  431.56    8.92
  -1  -4  -2  613.36   12.00
  -1  -4  -2  559.29   13.56
  -1  -4  -3  565.55   13.49
  -1   4  -4 2578.42   49.31
  -1  -4  -4 2517.32   47.29
  -1  -4  -5  248.74    8.05
  -1   4  -5  246.91    9.86
  -1  -4  -5  239.23    8.15
  -1  -4  -6   22.62    2.96
  -1   4  -6   28.46    4.40
  -1  -4  -6   23.95    2.77
  -1  -4  -7    6.62    2.18
  -1   4  -7    1.96    2.86
  -1  -4  -7    4.48    2.11
  -1  -4  -8   10.48    2.73
  -1   4  -8    8.68    3.09
  -1  -4  -8    9.10    2.33
  -1  -4  -9  521.25   15.55
  -1   4  -9  517.83   18.74
  -1  -4  -9  534.62   16.94
  -1  -4 -10  988.05   26.34
  -1   4 -10  932.18   28.26
  -1  -4 -10  952.96   24.25
  -1  -4 -11  209.77   10.98
  -1   4 -11  175.55   11.48
  -1  -4 -12  999.83   28.57
  -1   4 -12  914.64   30.23
  -1  -4 -13   -2.61    3.37
  -1   4 -13   -0.04    4.26
  -1   4 -14  465.60   21.73
  -1  -4 -14  506.89   20.50
  -1  -4 -15  143.09   11.11
  -1   4 -15  173.61   13.32
  -1   4 -16  279.81   17.74
  -1  -4 -16  272.98   16.06
  -1   4 -17   13.90    5.65
  -1  -4 -17    2.26    3.99
   1   5 -18  293.60   19.56
   1   5 -17  267.85   18.06
   1  -5 -17  268.68   16.13
   1   5 -16  150.08   13.00
   1  -5 -16  159.42   11.71
   1  -5 -15    4.93    3.43
   1   5 -15    2.80    4.21
   1  -5 -14   -0.21    2.94
   1   5 -14    1.98    3.86
   1   5 -13  179.30   12.69
   1  -5 -13  181.00   10.91
   1   5 -12   54.54    7.31
   1  -5 -12   61.99    6.36
   1  -5 -11    1.09    2.70
   1   5 -11   -2.63    3.74
   1   5 -10  899.79   27.00
   1  -5 -10  856.33   23.66
   1  -5  -9  133.02    7.43
   1   5  -9  118.08    8.45
   1   5  -8    7.85    3.21
  -1   5   8   10.62    1.44
   1  -5  -8   10.59    2.45
   1   5  -7  302.63   12.40
   1  -5  -7  312.52   10.39
   1  -5  -6  664.45   16.22
   1   5  -6  674.87   19.00
   1  -5  -6  668.38   13.22
   1  -5  -5 2325.49   40.87
   1   5  -5 2466.17   47.46
   1  -5  -5 2382.30   43.67
   1   5  -4  486.74   14.07
   1  -5  -4  505.97   10.11
   1  -5  -4  514.01   11.54
  -1   5   4  505.35   11.53
  -1   5   3  207.05    5.51
   1   5  -3  208.93    7.66
   1  -5  -3  205.00    5.59
   1  -5  -2  549.07   11.11
   1   5  -2  557.09   13.29
  -1   5   2  567.02   11.12
  -1   5   1  687.70   15.64
   1   5  -1  683.39   16.21
  -1  -5   1  697.12   14.78
   1   5  -1  697.26   14.71
  -1   5   1  705.21   13.63
  -1  -5   0  136.63    4.07
   1   5   0  123.27    5.52
  -1   5   0  137.97    5.40
   1   5   0  130.14    4.06
   1   5   1  586.24   11.49
  -1  -5  -1  597.92   11.48
   1   5   1  606.07   14.58
  -1  -5  -2 1792.73   34.96
  -1  -5  -2 1834.52   32.04
  -1  -5  -3  338.47    9.63
  -1  -5  -4 2059.83   37.59
  -1   5  -4 2054.28   41.20
  -1  -5  -4 2015.25   39.33
  -1   5  -5 1093.59   26.02
  -1  -5  -5 1072.97   23.47
  -1  -5  -5 1086.57   22.70
  -1  -5  -6  910.68   20.61
  -1  -5  -6  864.67   20.48
  -1   5  -6  900.81   23.71
  -1   5  -7  492.67   17.14
  -1  -5  -7  534.61   14.88
  -1  -5  -7  512.57   14.43
  -1   5  -8 1226.21   31.75
  -1  -5  -8 1194.36   27.19
  -1  -5  -8 1212.53   28.20
  -1   5  -9 1082.61   30.42
  -1  -5  -9 1101.83   25.94
  -1  -5  -9 1110.73   27.35
  -1  -5 -10  443.19   15.82
  -1  -5 -10  462.44   14.68
  -1   5 -10  444.22   18.23
  -1  -5 -11  123.70    8.23
  -1   5 -11  114.41    9.38
  -1  -5 -12   86.70    7.45
  -1   5 -12   83.03    8.66
  -1   5 -13  160.86   12.23
  -1  -5 -13  161.73   10.71
  -1   5 -14   93.35   10.11
  -1  -5 -14   98.28    8.66
  -1  -5 -15    4.75    3.69
  -1   5 -15    7.59    5.07
  -1  -5 -16  373.32   18.59
  -1   5 -16  363.77   20.60
  -1   5 -17  333.80   20.43
   1   6 -17   14.70    6.21
   1   6 -16  176.66   14.39
   1   6 -15  584.15   25.76
   1  -6 -15  632.21   23.30
   1  -6 -14    6.14    3.35
   1   6 -14    9.08    4.34
   1   6 -13 1017.65   33.26
   1  -6 -13 1047.34   29.79
   1  -6 -12  148.66    9.13
   1   6 -12  137.22   10.77
   1   6 -11 1313.20   36.51
   1  -6 -11 1308.85   32.41
   1   6 -10   22.27    4.72
   1  -6 -10   28.42    3.93
   1  -6  -9  191.66    8.82
   1   6  -9  191.71   10.94
   1   6  -8  111.72    7.99
   1  -6  -8  130.66    6.73
   1  -6  -7  572.47   15.20
   1  -6  -7  583.15   12.23
   1   6  -7  603.86   18.66
   1  -6  -6  569.03   14.48
   1  -6  -6  608.56   12.20
   1   6  -6  574.27   17.54
   1  -6  -5  200.38    5.30
   1   6  -5  202.03    8.91
   1  -6  -5  206.96    6.54
   1   6  -4  187.56    8.02
   1  -6  -4  196.72    5.34
  -1   6   4  193.81    5.67
   1  -6  -4  200.27    5.73
   1  -6  -3    2.95    0.92
   1   6  -3    5.06    2.03
  -1   6   3    3.07    0.84
  -1   6   2   41.10    3.45
   1   6  -2   45.58    3.36
  -1   6   2   47.41    1.98
  -1   6   1 4285.31   71.96
   1   6  -1 4152.06   75.89
  -1   6   1 4159.94   75.16
   1   6  -1 4164.27   73.40
   1   6   0  553.64   11.53
   1   6   0  548.58   14.27
  -1   6   0  543.16   13.83
  -1  -6   0  555.30   11.62
   1   6   1 1797.76   36.75
   1   6   1 1851.21   32.50
  -1  -6  -1 1879.50   32.47
  -1  -6  -2 2402.57   41.35
  -1  -6  -3  678.85   13.23
  -1  -6  -3  647.68   15.95
  -1   6  -3  644.93   16.68
  -1  -6  -4  148.89    6.20
  -1  -6  -4  143.71    4.87
  -1   6  -4  133.10    6.92
  -1  -6  -5  953.61   21.51
  -1  -6  -5  966.83   20.16
  -1   6  -5  901.13   23.59
  -1  -6  -6   98.08    4.95
  -1  -6  -6   91.76    5.17
  -1   6  -6   92.88    6.70
  -1   6  -7   29.46    4.38
  -1  -6  -7   41.09    3.61
  -1  -6  -7   38.19    3.51
  -1  -6  -8    4.47    2.05
  -1  -6  -8   11.21    2.62
  -1   6  -8    8.97    3.35
  -1  -6  -9    9.91    2.48
  -1  -6  -9    5.67    2.37
  -1   6  -9   14.50    4.34
  -1  -6 -10 1035.81   25.34
  -1  -6 -10 1022.52   26.71
  -1   6 -10 1058.02   30.82
  -1  -6 -11 1064.58   26.52
  -1  -6 -11 1091.56   28.56
  -1   6 -11 1041.36   32.07
  -1   6 -12  168.45   12.03
  -1  -6 -12  168.34   10.11
  -1  -6 -13  238.33   12.72
  -1   6 -13  262.82   15.62
  -1  -6 -14  156.44   10.90
  -1   6 -14  155.46   12.55
  -1  -6 -15  241.42   13.95
  -1   6 -15  268.08   16.96
  -1   6 -16   47.48    8.07
  -1   6 -17   49.22    8.62
   1   7 -17  504.69   25.68
   1   7 -16   21.83    6.73
   1   7 -15   89.89   10.41
   1   7 -14   41.66    7.64
   1  -7 -14   31.85    4.99
   1   7 -13   35.12    6.27
   1  -7 -13   28.58    4.57
   1  -7 -12   14.98    3.41
   1   7 -12    9.55    4.74
   1  -7 -11  631.84   19.55
   1   7 -11  628.00   23.26
   1   7 -10    0.20    3.53
   1  -7 -10    1.06    2.06
   1  -7  -9  318.39   11.48
   1   7  -9  311.08   14.28
   1  -7  -8   24.16    2.93
   1  -7  -8   23.80    1.79
   1   7  -8   17.48    4.01
   1  -7  -7 1781.20   35.17
   1   7  -7 1731.01   40.02
   1  -7  -7 1761.80   32.08
   1  -7  -6   34.26    2.05
   1   7  -6   28.96    4.13
   1  -7  -6   36.47    2.85
   1  -7  -5 1133.62   21.61
   1  -7  -5 1041.18   20.75
   1   7  -5 1056.38   25.83
   1  -7  -4  195.42    5.44
   1   7  -4  190.85    8.19
  -1   7   4  191.88    5.39
   1  -7  -3 1450.73   25.79
   1   7  -3 1422.15   30.08
  -1   7   3 1436.13   25.74
   1   7  -2  503.95   13.04
  -1   7   2  496.44   13.95
  -1   7   2  519.41   10.17
   1   7  -1  792.26   19.63
  -1   7   1  812.08   15.71
  -1   7   1  783.22   18.93
   1   7  -1  805.71   17.03
   1   7   0    1.27    1.01
  -1  -7   0    1.20    0.91
  -1   7   0    2.57    2.04
   1   7   0    0.77    1.90
   1   7   1 1894.57   33.36
  -1   7  -1 1900.13   38.20
   1   7   1 1885.75   38.60
  -1  -7  -1 1923.88   33.34
  -1   7  -2   69.53    4.27
  -1  -7  -3   11.25    0.94
  -1  -7  -3   15.07    2.23
  -1   7  -3   17.05    2.81
  -1  -7  -4   81.62    4.69
  -1  -7  -4   80.28    3.18
  -1   7  -4   81.60    5.50
  -1  -7  -5 3245.77   57.07
  -1   7  -5 3165.54   62.79
  -1  -7  -5 3151.37   59.78
  -1  -7  -6    5.56    1.70
  -1   7  -6    3.52    2.52
  -1  -7  -6    0.10    1.91
  -1   7  -7  608.85   19.87
  -1  -7  -7  607.06   16.49
  -1  -7  -7  634.12   15.98
  -1  -7  -8   12.92    2.59
  -1   7  -8    7.47    3.37
  -1  -7  -8    8.83    2.29
  -1  -7  -9  436.31   13.94
  -1  -7  -9  405.41   13.28
  -1   7  -9  405.42   16.95
  -1  -7 -10   54.29    4.73
  -1   7 -10   64.95    7.41
  -1  -7 -10   65.79    5.50
  -1   7 -11  252.58   14.24
  -1  -7 -11  224.27    9.88
  -1  -7 -11  225.69   10.91
  -1  -7 -12   39.31    5.04
  -1   7 -12   29.75    6.07
  -1  -7 -13   66.23    6.82
  -1   7 -13   69.39    8.52
  -1   7 -14    3.42    4.23
  -1   7 -15   39.84    7.88
  -1   7 -16   -2.48    5.11
  -1   7 -17  138.39   13.24
   1   8 -17   41.30    7.98
   1   8 -16  110.67   11.98
   1   8 -15  383.96   20.81
   1   8 -14  105.33   10.74
   1   8 -13  485.87   21.92
   1   8 -12  476.75   21.01
   1  -8 -12  481.42   16.85
   1  -8 -11  513.47   16.71
   1   8 -11  492.84   20.50
   1  -8 -10   95.49    6.19
   1   8 -10  100.03    8.74
   1   8  -9  147.36    9.98
   1  -8  -9  146.19    7.20
   1  -8  -8   47.53    2.55
   1   8  -8   59.37    6.25
   1  -8  -8   47.06    3.71
   1   8  -7   43.94    5.04
   1  -8  -7   43.84    3.46
   1  -8  -7   51.71    2.64
   1   8  -6  229.67   10.51
   1  -8  -6  238.84    6.72
   1  -8  -6  219.93    7.12
  -1   8   5 1185.72   23.01
   1  -8  -5 1199.95   23.63
   1   8  -5 1231.69   28.65
   1  -8  -5 1220.68   23.22
   1   8  -4  193.55    8.32
   1  -8  -4  185.71    4.91
  -1   8   4  185.58    4.91
   1   8  -3    0.88    1.72
  -1   8   3    2.51    0.52
  -1   8   2  750.30   14.09
   1   8  -2  764.85   17.66
   1   8  -2  742.86   19.71
  -1   8   2  776.22   19.26
   1   8  -1 4887.16   85.92
  -1   8   1 5000.29   89.20
  -1   8   1 4903.52   84.20
   1   8  -1 4986.19   89.91
  -1   8   0 1861.03   37.56
   1   8   0 1864.15   38.17
   1   8   0 1710.19   33.23
  -1  -8   0 1949.31   33.62
  -1  -8  -1  415.77    8.57
  -1   8  -1  411.92   11.03
   1   8   1  408.66    8.60
   1   8   1  398.70   12.99
  -1   8  -1  414.60   12.82
   1   8   2   10.20    2.62
  -1   8  -2   12.88    2.32
  -1  -8  -3  139.86    6.50
  -1   8  -3  128.49    6.50
  -1  -8  -4  136.55    3.95
  -1  -8  -4  129.91    6.26
  -1   8  -4  134.66    7.19
  -1  -8  -4  139.58    3.97
  -1   8  -5  650.36   19.34
  -1  -8  -5  692.98   14.46
  -1  -8  -5  680.27   17.53
  -1   8  -6  229.78   10.75
  -1  -8  -6  223.47    7.11
  -1  -8  -6  214.86    8.61
  -1  -8  -7  565.17   14.54
  -1   8  -7  593.10   19.53
  -1  -8  -7  580.81   15.95
  -1  -8  -8  124.43    6.26
  -1   8  -8  131.05    9.16
  -1  -8  -8  136.94    6.88
  -1  -8  -9   19.19    2.90
  -1  -8  -9   16.20    2.84
  -1   8  -9   23.88    4.74
  -1  -8 -10  205.11    9.05
  -1   8 -10  201.91   12.40
  -1  -8 -10  208.99    9.51
  -1  -8 -11  996.44   26.17
  -1   8 -11  962.69   31.23
  -1   8 -12  182.00   12.84
  -1  -8 -12  184.70   10.08
  -1   8 -13  269.40   16.30
  -1   8 -14  177.65   13.95
  -1   8 -15  227.53   16.26
  -1   8 -16  147.79   13.41
   1   9 -17   28.08    7.24
   1   9 -16  104.98   11.26
   1   9 -15    7.81    5.13
   1   9 -14    5.90    4.34
   1   9 -13   15.50    5.21
   1   9 -12   25.64    6.25
   1  -9 -11  122.40    7.25
   1   9 -11  108.75    9.69
   1  -9 -10 1304.46   29.97
   1   9 -10 1337.39   36.74
   1  -9  -9   37.46    3.60
   1   9  -9   36.00    5.77
   1  -9  -8  706.23   15.10
   1  -9  -8  725.91   17.48
   1   9  -8  711.93   22.71
   1  -9  -7  447.76   11.67
   1   9  -7  445.34   16.19
   1  -9  -7  434.31   10.64
   1   9  -6 3266.64   66.22
   1  -9  -6 3359.31   58.88
   1  -9  -6 3307.07   59.34
   1  -9  -5  260.78    7.90
   1  -9  -5  254.61    6.42
   1   9  -5  240.90   10.46
   1   9  -4 2311.16   46.76
   1   9  -3   70.88    4.77
  -1   9   2   15.93    1.03
   1   9  -2   18.60    3.67
  -1   9   2   14.51    3.18
   1   9  -2   20.16    2.55
   1   9  -1   29.27    2.60
  -1   9   1   46.39    2.32
  -1   9   1   28.65    1.86
  -1   9   1   32.24    3.91
   1   9  -1   31.45    4.17
  -1   9   0    8.84    1.55
  -1   9   0   14.78    2.83
   1   9   0    8.01    3.06
  -1  -9   0    9.46    1.30
   1   9   0   11.35    1.51
  -1  -9  -1  873.44   16.60
  -1   9  -1  889.21   19.66
   1   9   1  898.46   22.84
  -1   9  -1  904.25   22.50
   1   9   1  913.59   16.73
   1   9   2  409.70   13.93
  -1   9  -2  431.58   12.36
  -1   9  -3   40.78    3.94
  -1  -9  -4 1278.66   28.78
  -1   9  -4 1335.76   30.29
  -1  -9  -5 1285.55   24.25
  -1   9  -5 1344.54   31.66
  -1  -9  -5 1333.78   24.22
  -1  -9  -5 1299.27   28.93
  -1  -9  -6  230.76    9.39
  -1  -9  -6  249.45    7.10
  -1   9  -6  240.97   11.34
  -1  -9  -7   18.78    2.18
  -1   9  -7   21.44    4.12
  -1  -9  -7   19.18    2.86
  -1  -9  -8  578.75   16.40
  -1  -9  -8  574.98   14.97
  -1   9  -8  527.92   19.79
  -1  -9  -9   44.85    4.26
  -1  -9  -9   36.87    3.66
  -1   9  -9   27.80    5.01
  -1  -9 -10  303.83   11.50
  -1  -9 -10  304.39   11.43
  -1   9 -10  303.42   15.47
  -1   9 -11   69.16    7.91
  -1   9 -12   17.79    5.41
  -1   9 -13    0.02    4.16
  -1   9 -14    6.60    4.57
  -1   9 -15    1.57    4.69
  -1   9 -16  618.42   28.53
   1  10 -16  611.87   28.19
   1  10 -15    7.70    5.16
   1  10 -14  143.68   12.66
   1  10 -13   15.43    5.32
   1  10 -12 1469.51   42.14
   1  10 -11   70.42    8.19
   1  10 -10  992.74   30.75
   1  10  -9   98.39    8.49
   1 -10  -9   94.74    5.33
   1  10  -8  109.07    8.40
   1 -10  -8  116.80    5.30
   1 -10  -7  135.18    5.15
   1  10  -7  139.34    8.82
   1 -10  -7  138.08    5.30
   1  10  -6   17.42    3.66
   1 -10  -6   11.52    1.78
   1 -10  -6   11.03    1.25
   1  10  -5  115.85    7.31
   1 -10  -5  126.59    5.46
   1  10  -4 2113.50   43.68
   1  10  -3   18.16    2.76
   1  10  -3   15.88    3.69
   1  10  -2 1155.96   24.58
  -1  10   2 1095.34   27.09
   1  10  -2 1116.52   27.98
  -1  10   1  597.79   17.46
  -1  10   1  606.84   12.66
   1  10  -1  598.57   14.20
   1  10  -1  599.14   18.02
  -1  10   1  592.09   12.61
   1  10   0 1406.44   32.54
   1  10   0 1444.05   27.04
  -1  10   0 1423.74   32.24
  -1  10   0 1412.89   27.75
  -1  10  -1   28.30    3.70
   1  10   1   24.28    1.45
  -1  10  -1   27.82    2.80
   1  10   1   18.10    3.40
  -1  10  -2 1415.05   29.84
   1  10   2 1406.44   32.79
  -1  10  -2 1364.33   32.23
  -1  10  -3    5.12    2.21
  -1 -10  -4  381.97   12.73
  -1  10  -4  399.47   13.62
  -1  10  -5   95.17    6.79
  -1 -10  -5   95.45    5.76
  -1 -10  -6    5.90    0.98
  -1  10  -6    7.48    3.12
  -1 -10  -6    5.56    1.89
  -1 -10  -7   13.93    1.75
  -1  10  -7   19.67    4.12
  -1 -10  -7   12.58    2.16
  -1 -10  -8   75.02    5.22
  -1 -10  -8   70.30    4.18
  -1  10  -8   71.51    7.07
  -1 -10  -9   81.96    5.66
  -1  10  -9   74.63    7.79
  -1  10 -10  414.53   18.57
  -1  10 -11   -0.38    4.09
  -1  10 -12   95.59    9.87
  -1  10 -13  248.41   16.04
  -1  10 -14  537.28   24.92
  -1  10 -15    2.04    3.99
  -1  10 -16  299.50   19.60
   1  11 -16  114.39   12.31
   1  11 -15  123.49   12.43
   1  11 -14    6.79    5.12
   1  11 -13   -0.44    4.15
   1  11 -12   17.92    5.14
   1  11 -11    4.72    4.05
   1  11 -10  867.39   28.58
   1  11  -9  173.23   11.43
   1  11  -8  639.71   21.89
   1  11  -7 1383.16   35.66
   1 -11  -7 1447.74   28.93
   1 -11  -6 2321.20   44.32
   1  11  -6 2356.22   50.55
   1  11  -5   49.58    5.12
   1  11  -4  353.78   12.51
   1  11  -3  110.95    6.10
   1  11  -3   98.80    7.38
   1  11  -2  841.19   19.70
  -1  11   2  816.26   22.65
   1  11  -2  836.85   23.45
  -1  11   1  106.79    7.04
  -1  11   1  106.72    3.89
   1  11  -1  110.65    4.92
   1  11  -1  117.04    7.68
  -1  11   1  111.29    3.92
  -1  11   0   38.36    2.74
   1  11   0   39.98    2.52
   1  11   0   32.20    4.58
  -1  11   0   42.49    4.82
   1  11   1  704.57   20.23
  -1  11  -1  632.77   19.25
   1  11   1  643.86   12.57
  -1  11  -1  672.39   16.20
   1  11   2   68.86    6.11
  -1  11  -2   73.83    6.23
  -1  11  -2   63.04    4.53
  -1  11  -3   56.21    4.65
  -1  11  -4  639.13   18.77
  -1 -11  -4  647.43   18.28
  -1  11  -5 1205.95   30.23
  -1 -11  -5 1220.47   28.52
  -1  11  -6 1434.84   35.51
  -1 -11  -6 1458.12   32.74
  -1  11  -7  655.16   21.55
  -1 -11  -7  634.35   18.27
  -1  11  -8  247.62   13.18
  -1 -11  -8  243.03   10.06
  -1 -11  -9   37.53    4.05
  -1  11  -9   28.41    5.47
  -1  11 -10  303.08   15.88
  -1  11 -11  132.72   10.97
  -1  11 -12   13.72    4.98
  -1  11 -13   19.22    5.97
  -1  11 -14    8.28    4.17
  -1  11 -15   50.45    8.39
  -1  11 -16  356.77   21.74
   1  12 -16   21.28    6.35
   1  12 -15  277.90   18.38
   1  12 -14   87.58   10.09
   1  12 -13  597.63   25.63
   1  12 -12  324.64   17.88
   1  12 -11  299.08   16.35
   1  12 -10   43.53    6.64
   1  12  -9  131.11    9.92
   1  12  -8  132.93    9.54
   1  12  -7   27.15    4.80
   1 -12  -6  103.89    5.34
   1  12  -6   94.03    7.30
   1  12  -5  410.78   14.78
   1  12  -4  230.76   10.04
   1  12  -4  244.70   12.01
   1  12  -3  126.97    6.77
   1  12  -3  121.55    8.31
   1  12  -2  214.25   10.89
  -1  12   2  219.65   10.58
   1  12  -2  201.24    7.91
  -1  12   1 1821.69   34.19
  -1  12   1 1915.75   42.22
   1  12  -1 1882.16   42.68
   1  12  -1 1910.14   36.60
  -1  12   1 1947.79   34.30
  -1  12   0  965.40   20.46
  -1  12   0  978.01   25.93
   1  12   0  979.59   19.75
   1  12   0  971.67   26.26
  -1  12  -1  914.64   24.46
   1  12   1  821.84   15.68
   1  12   1  934.31   24.84
  -1  12  -1  894.29   20.00
   1  12   2   76.81    6.53
  -1  12  -2   72.97    4.89
  -1  12  -2   79.36    6.48
  -1  12  -3  589.17   16.88
  -1  12  -3  540.03   18.73
  -1  12  -4  547.46   17.12
  -1 -12  -4  532.02   16.69
  -1  12  -5  143.26    8.46
  -1 -12  -5  128.50    7.34
  -1  12  -6   32.30    4.82
  -1 -12  -6   30.22    3.82
  -1 -12  -7  335.33   12.58
  -1  12  -7  329.43   14.90
  -1 -12  -8   -1.39    2.21
  -1  12  -8    1.50    3.17
  -1  12  -9   34.98    5.90
  -1  12 -10   23.06    5.42
  -1  12 -11  499.03   21.94
  -1  12 -12  151.90   12.48
  -1  12 -13  355.63   19.62
  -1  12 -14   24.49    6.21
  -1  12 -15  173.46   14.90
   1  13 -15   54.92    9.15
   1  13 -14    6.05    4.93
   1  13 -13   62.41    8.57
   1  13 -12    8.73    4.60
   1  13 -11  177.26   12.88
   1  13 -10   25.95    5.13
   1  13  -9  550.13   21.43
   1  13  -8   -1.90    3.08
   1  13  -7 1352.55   35.06
   1  13  -6  236.26   11.65
   1 -13  -6  245.97    9.21
   1  13  -5 1130.18   28.73
   1  13  -4    2.50    2.50
   1  13  -4    3.43    3.58
   1  13  -3  207.44   11.22
   1  13  -3  189.07    8.44
  -1  13   2  558.26   18.69
   1  13  -2  528.89   18.80
   1  13  -2  547.91   15.01
   1  13  -1  534.48   13.69
  -1  13   1  546.46   11.69
   1  13  -1  537.13   18.81
  -1  13   1  551.30   18.53
  -1  13   0  322.62   13.63
   1  13   0  329.40   13.94
   1  13   0  333.85    8.80
  -1  13   0  339.13    9.39
  -1  13  -1   58.50    4.03
   1  13   1   60.68    6.17
  -1  13  -1   54.69    5.75
   1  13   2   -1.00    3.38
  -1  13  -2    3.47    1.91
  -1  13  -2   -0.48    3.07
  -1  13  -3   69.74    5.41
  -1  13  -3   67.28    6.32
  -1 -13  -4  443.08   15.23
  -1  13  -4  442.52   15.24
  -1 -13  -5 1458.25   34.20
  -1  13  -5 1456.04   35.21
  -1 -13  -6    1.67    1.70
  -1  13  -6    3.31    3.35
  -1  13  -7  744.11   24.03
  -1 -13  -7  743.61   21.13
  -1 -13  -8  104.16    6.80
  -1  13  -8  105.59    8.86
  -1  13  -9  536.65   21.44
  -1  13 -10  111.57    9.87
  -1  13 -11   38.06    6.84
  -1  13 -12   -1.20    4.21
  -1  13 -13   15.39    5.97
  -1  13 -14   11.97    5.44
  -1  13 -15   49.37    8.83
   1  14 -15  317.02   19.92
   1  14 -14   23.04    5.90
   1  14 -13  175.79   13.90
   1  14 -12   36.66    7.13
   1  14 -11 1090.46   35.10
   1  14 -10   23.67    5.33
   1  14  -9   82.87    8.26
   1  14  -8  109.53    8.92
   1  14  -7  377.31   15.93
   1 -14  -6    0.48    1.38
   1  14  -6    0.59    2.54
   1  14  -5  178.83    9.57
   1  14  -5  182.54   11.29
   1  14  -4   25.56    3.70
   1  14  -4   27.45    5.08
   1  14  -3  919.11   27.70
   1  14  -3  960.33   23.60
  -1  14   2  143.33    9.27
   1  14  -2  139.71    9.54
   1  14  -2  160.11    7.07
   1  14  -1 1018.70   29.07
   1  14  -1 1044.06   22.60
  -1  14   1 1059.81   29.09
  -1  14   0   63.61    6.55
   1  14   0   32.57    5.13
  -1  14   0   47.78    3.14
   1  14   0   43.73    2.75
   1  14   1  742.29   23.67
  -1  14  -1  730.22   23.09
  -1  14  -1  767.36   18.35
  -1  14  -2  321.18   14.44
   1  14   2  308.10   14.30
  -1  14  -2  324.59   11.22
  -1  14  -3  321.96   14.54
  -1  14  -3  326.02   12.02
  -1  14  -4   22.24    4.64
  -1  14  -4   26.01    3.96
  -1 -14  -5    1.81    1.88
  -1  14  -5    3.44    2.52
  -1 -14  -6   -0.38    1.99
  -1  14  -6   -1.65    3.16
  -1  14  -7    2.65    2.86
  -1 -14  -7    0.06    1.94
  -1  14  -8   71.25    7.50
  -1  14  -9   44.59    6.82
  -1  14 -10  394.44   19.04
  -1  14 -11  572.88   24.27
  -1  14 -12   47.77    7.51
  -1  14 -13   71.79    9.59
  -1  14 -14  107.78   11.72
  -1  14 -15  445.60   24.31
   1  15 -15   22.06    6.52
   1  15 -14   -0.63    3.89
   1  15 -13   53.51    8.00
   1  15 -12    3.56    4.50
   1  15 -11  105.74   10.25
   1  15 -10  128.45   10.64
   1  15  -9  233.38   13.67
   1  15  -8  138.38   10.20
   1  15  -7   25.43    4.78
   1  15  -6  466.83   19.81
   1  15  -6  485.83   17.83
   1  15  -5  451.75   16.24
   1  15  -5  471.75   19.38
   1  15  -4   37.70    5.88
   1  15  -4   31.68    4.13
   1  15  -3    0.90    1.86
   1  15  -3   -2.88    3.78
   1  15  -2    5.92    3.75
  -1  15   2    4.06    3.61
   1  15  -2    5.13    2.17
   1  15  -1   31.30    5.69
   1  15  -1   32.59    2.94
  -1  15   1   26.43    4.82
  -1  15   0  117.65    8.73
   1  15   0  125.36    9.55
  -1  15  -1    5.67    4.02
   1  15   1    0.54    3.24
  -1  15  -1    0.29    1.64
  -1  15  -2  182.82    8.11
   1  15   2  175.17   10.91
  -1  15  -2  150.30   10.14
  -1  15  -3  100.81    6.46
  -1  15  -3  102.80    8.52
  -1  15  -4  323.52   13.00
  -1  15  -4  331.08   15.61
  -1  15  -5  389.82   15.29
  -1  15  -5  389.20   17.49
  -1 -15  -5  391.37   15.12
  -1 -15  -6  559.50   18.46
  -1  15  -6  580.28   20.14
  -1 -15  -7  158.16    8.86
  -1  15  -7  141.28    9.87
  -1  15  -8  135.34   10.32
  -1  15  -9  522.29   21.59
  -1  15 -10  189.50   13.20
  -1  15 -11    9.89    4.63
  -1  15 -12   11.79    5.50
  -1  15 -13   28.83    6.84
  -1  15 -14   -5.79    5.21
   1  16 -14  445.72   23.58
   1  16 -13    7.98    5.33
   1  16 -12  420.46   21.37
   1  16 -11  231.98   15.01
   1  16 -10  121.49   10.61
   1  16  -9   68.35    7.83
   1  16  -8  209.22   12.49
   1  16  -7   22.28    4.63
   1  16  -7    3.94    4.09
   1  16  -6   60.43    7.78
   1  16  -6   61.81    6.40
   1  16  -5   82.13    6.67
   1  16  -5   90.40    8.90
   1  16  -4  147.11   10.57
   1  16  -4  136.23    8.04
   1  16  -3   14.24    4.23
   1  16  -3   13.17    2.74
   1  16  -2  365.83   16.64
  -1  16   2  371.59   16.32
   1  16  -1   88.12    8.05
  -1  16   1   90.14    8.15
   1  16   0 1898.14   46.33
  -1  16   0 1820.11   45.13
   1  16   1   62.17    7.23
  -1  16  -1   67.10    7.01
  -1  16  -2  120.15    6.58
  -1  16  -2  113.53    9.13
   1  16   2  114.28    9.30
  -1  16  -3   10.29    2.59
  -1  16  -3    4.86    3.80
  -1  16  -4  567.47   18.46
  -1  16  -4  591.51   22.16
  -1  16  -5   31.82    4.59
  -1 -16  -5   33.12    4.40
  -1  16  -5   37.23    6.01
  -1 -16  -6   13.94    3.40
  -1  16  -6   10.35    4.75
  -1  16  -6    8.58    3.31
  -1  16  -7   69.90    7.28
  -1  16  -8  138.67   10.56
  -1  16  -9   17.38    5.00
  -1  16 -10  262.54   15.72
  -1  16 -11   62.71    8.49
  -1  16 -12  501.47   23.87
  -1  16 -13   28.03    6.99
  -1  16 -14  141.17   13.69
   1  17 -14   22.27    6.93
   1  17 -13    5.86    4.94
   1  17 -12   49.95    8.15
   1  17 -11   18.11    5.69
   1  17 -10  212.04   13.96
   1  17  -9   65.28    7.78
   1  17  -8  312.06   17.56
   1  17  -8  303.73   15.44
   1  17  -7   40.89    5.73
   1  17  -7   26.51    5.97
   1  17  -6  749.00   23.62
   1  17  -6  743.54   27.18
   1  17  -5   29.75    5.80
   1  17  -5   25.95    4.14
   1  17  -4   20.38    5.29
   1  17  -3    8.47    4.10
   1  17  -2  467.08   19.74
  -1  17   2  460.73   19.22
  -1  17   1   37.29    5.96
   1  17  -1   22.88    5.15
  -1  17   0   31.52    5.90
   1  17   0   35.63    6.17
  -1  17  -1   15.89    4.48
   1  17   1    5.52    3.80
   1  17   2   52.56    6.74
  -1  17  -2   41.49    6.40
  -1  17  -3  138.87   10.58
  -1  17  -4  377.56   17.96
  -1  17  -4  407.48   15.11
  -1  17  -5   21.02    4.13
  -1 -17  -5   17.97    3.93
  -1  17  -5   21.30    5.53
  -1  17  -6 1358.30   35.78
  -1  17  -6 1336.71   39.34
  -1  17  -7   75.58    7.57
  -1  17  -7   69.11    8.42
  -1  17  -8  113.36    9.67
  -1  17  -9    6.95    4.04
  -1  17 -10  355.16   18.72
  -1  17 -11    9.42    5.08
  -1  17 -12    3.10    4.52
  -1  17 -13    5.36    4.92
   1  18 -13   46.47    7.88
   1  18 -12  209.04   15.36
   1  18 -11  179.71   13.52
   1  18 -10   24.63    5.41
   1  18  -9    3.71    3.79
   1  18  -9   11.24    4.96
   1  18  -8   31.07    6.80
   1  18  -8   31.20    5.84
   1  18  -7    1.08    4.34
   1  18  -7    2.92    4.11
   1  18  -6   66.82    8.18
   1  18  -5   15.54    5.15
   1  18  -4  266.91   15.31
   1  18  -3  368.12   18.04
  -1  18   2  324.46   16.45
   1  18  -2  356.10   17.27
  -1  18   1  120.96   10.00
   1  18  -1  106.54    9.58
  -1  18   0 1060.11   32.26
   1  18   0 1000.04   32.21
  -1  18  -1  477.37   20.13
   1  18   1  497.24   20.91
  -1  18  -2    7.42    3.73
   1  18   2    9.23    4.50
  -1  18  -3  417.92   19.10
  -1  18  -4  139.25   11.17
  -1 -18  -5   17.09    3.80
  -1  18  -5    8.82    5.28
  -1  18  -6   90.28    9.41
  -1  18  -6   95.02    8.04
  -1  18  -7    2.81    3.59
  -1  18  -7    4.14    4.29
  -1  18  -8   51.66    8.25
  -1  18  -8   52.92    6.98
  -1  18  -9  256.95   15.44
  -1  18 -10  194.63   13.96
  -1  18 -11  277.22   17.36
  -1  18 -12  260.30   17.53
  -1  18 -13  119.65   12.26
   1  19 -13   38.46    7.86
   1  19 -12    5.38    5.17
   1  19 -11   39.74    6.81
   1  19 -10  112.46   11.94
   1  19 -10  122.13   10.94
   1  19  -9  345.15   19.77
   1  19  -8    3.48    4.81
   1  19  -7  396.50   20.43
   1  19  -6  123.07   11.24
   1  19  -5 1173.27   37.30
   1  19  -4   18.82    6.29
   1  19  -3  346.60   17.90
   1  19  -2    5.21    4.25
  -1  19   2   16.18    5.10
   1  19  -1   34.74    6.45
  -1  19   1   47.62    7.08
   1  19   0   65.53    8.42
  -1  19   0   60.18    7.71
   1  19   1   80.21    8.91
  -1  19  -1   82.41    8.84
  -1  19  -2   76.90    8.35
  -1  19  -3  463.11   20.76
  -1  19  -4   76.51    8.61
  -1 -19  -4   73.95    7.37
  -1  19  -5  328.70   17.72
  -1  19  -6   75.13    9.07
  -1  19  -7  326.75   18.43
  -1  19  -8   60.36    8.52
  -1  19  -9  543.68   25.29
  -1  19  -9  549.35   23.14
  -1  19 -10  132.89   11.74
  -1  19 -11   18.53    6.33
  -1  19 -12   12.49    5.69
   1  20 -10    2.85    5.09
   1  20  -9    2.52    5.20
   1  20  -8    5.24    4.83
   1  20  -7  113.49   11.51
   1  20  -6   61.00    8.78
   1  20  -5  110.03   10.90
   1  20  -4    1.92    4.78
   1  20  -3  374.41   19.27
  -1  20   2   99.10    9.79
   1  20  -2   87.41    9.54
   1  20  -1  911.20   31.43
  -1  20   1  852.82   30.17
   1  20   0   14.64    5.26
  -1  20   0   24.50    5.86
   1  20   1  611.75   24.91
  -1  20  -1  600.15   24.46
  -1  20  -2   14.54    4.22
  -1  20  -3  337.49   18.07
  -1 -20  -4   12.38    3.72
  -1  20  -4   19.93    5.66
  -1  20  -5   86.03    9.65
  -1  20  -6   -1.14    4.33
  -1  20  -7   -1.33    4.76
  -1  20  -8   26.15    6.71
  -1  20  -9   60.71    9.27
  -1  20 -10   15.21    5.94
   1  21  -9  116.43   11.99
   1  21  -8  123.71   12.42
   1  21  -7  505.76   24.51
   1  21  -6  109.75   11.59
   1  21  -5  288.20   17.68
   1  21  -4  124.09   11.61
   1  21  -3  124.64   11.57
   1  21  -2   59.41    8.66
  -1  21   1  135.74   11.61
   1  21  -1  136.57   11.90
  -1  21   0   35.34    6.36
   1  21   0   56.07    7.97
   1  21   1  264.09   16.55
  -1  21  -1  284.59   16.86
  -1  21  -2   85.78    9.87
  -1  21  -3   57.68    8.23
  -1  21  -4   87.08    9.88
  -1  21  -5  610.12   26.32
  -1  21  -6  253.98   16.80
  -1  21  -7  206.46   15.38
  -1  21  -8   83.24   10.02
  -1  21  -9  135.50   13.20
   1  22  -8    8.91    5.25
   1  22  -7   18.17    6.64
   1  22  -6    8.00    4.95
   1  22  -5  105.39   11.19
   1  22  -4   44.59    7.55
   1  22  -3   27.10    6.46
   1  22  -2  218.18   15.41
   1  22  -1  113.88   11.31
  -1  22   1  106.77   10.60
  -1  22   0  444.79   21.83
   1  22   0  444.26   22.03
  -1  22  -1   73.85    9.21
   1  22   1   78.33    9.76
  -1  22  -2  234.73   15.75
  -1  22  -3  267.39   16.93
  -1  22  -4  169.46   13.75
  -1  22  -5  214.22   15.45
  -1  22  -6   -0.86    4.41
  -1  22  -7   28.94    6.78
   1  23  -6  438.96   23.48
   1  23  -5   17.01    5.94
   1  23  -4  178.61   14.38
   1  23  -3    5.06    4.97
   1  23  -2   46.57    8.07
   1  23  -1   10.42    5.13
  -1  23   1    6.75    4.81
  -1  23   0   16.44    5.64
   1  23   0   12.49    5.56
  -1  23  -1  103.34   11.02
  -1  23  -2   42.87    7.51
  -1  23  -3   37.96    7.50
  -1  23  -4  331.98   19.70
  -1  23  -5   28.07    7.51
  -1  23  -6  281.46   18.32
   1  24  -3   31.70    6.65
   1  24  -2   39.69    7.78
   1  24  -1   26.55    6.36
  -1  24   0  233.78   16.48
   1  24   0  239.22   17.00
  -1  24  -1  104.85   11.30
  -1  24  -2  250.09   17.08
  -1  24  -3   16.61    5.90
   2   0 -18    8.23    4.65
   2   0 -17    1.71    4.76
   2   0 -16  701.00   27.68
   2   0 -15   -2.92    3.71
   2   0 -14  618.75   23.84
   2   0 -13   -1.39    3.43
   2   0 -12  598.73   21.76
   2   0 -11    3.44    3.55
   2   0 -10  240.87   11.84
   2   0  -9   -0.34    2.80
   2   0  -8  774.42   21.68
   2   0  -7    0.09    2.48
   2   0  -6  710.99   18.77
   2   0  -5    0.02    2.25
   2   0  -4  161.35    6.69
   2   0  -3    1.66    1.61
  -2   0   2 2306.07   41.08
   2   0  -2 2306.97   42.63
   2   0  -1    3.19    1.90
   2   0  -1    4.01    1.34
  -2   0   1    4.30    1.54
  -2   0   0  600.75   13.51
   2   0   0  638.64   13.51
   2   0   0  581.85   13.66
  -2   0  -1   -0.16    1.69
  -2   0  -2 6159.94  107.11
  -2   0  -3    3.78    2.20
  -2   0  -4 4423.70   80.14
  -2   0  -5    2.55    2.35
  -2   0  -6   53.30    4.65
  -2   0  -7    2.76    2.43
  -2   0  -7    1.30    2.67
  -2   0  -8   22.85    3.92
  -2   0  -8   31.73    4.15
  -2   0  -9    8.70    3.76
  -2   0 -10 1252.44   33.38
  -2   0 -11    2.29    3.22
  -2   0 -12 1460.73   39.41
  -2   0 -13   10.04    4.60
  -2   0 -14  309.86   17.02
  -2   0 -15    1.46    3.58
  -2   0 -16  322.34   18.69
  -2   0 -17    5.88    4.43
  -2   0 -18   16.82    5.99
   2  -1 -18  153.36   13.39
   2   1 -18  142.77   13.17
   2   1 -17  124.33   11.87
   2  -1 -17  124.56   11.56
   2  -1 -16  237.75   15.21
   2   1 -16  256.23   16.21
   2   1 -15   18.45    5.04
   2  -1 -15   23.96    5.67
   2   1 -14   42.04    6.44
   2  -1 -14   42.05    6.59
   2   1 -13   27.66    5.18
   2  -1 -13   18.13    4.55
   2  -1 -12   17.61    4.23
   2   1 -12   17.20    4.86
   2   1 -11  296.30   14.05
   2  -1 -11  285.80   13.44
   2  -1 -10  254.62   12.22
   2   1 -10  275.39   12.83
   2  -1  -9  279.02   11.92
   2   1  -9  265.84   12.10
   2   1  -8  459.18   15.81
   2  -1  -8  481.69   15.62
   2  -1  -7  652.65   18.37
   2   1  -7  687.77   19.16
   2  -1  -6 1436.23   31.10
   2   1  -6 1422.23   31.64
   2  -1  -5 1766.51   35.66
   2   1  -5 1759.30   36.23
   2   1  -4  541.20   14.34
   2  -1  -4  551.44   13.97
  -2   1   3  194.40    4.86
   2   1  -3  178.62    6.84
   2  -1  -3  166.09    6.39
  -2   1   2 3992.70   67.48
   2   1  -2 3910.54   69.75
   2  -1  -2 3870.56   69.53
   2  -1  -1  272.41    6.80
   2   1  -1  251.86    7.57
  -2   1   1  252.08    6.77
   2  -1  -1  268.24    7.59
  -2  -1   1  264.26    7.37
   2   1  -1  269.76    5.85
   2  -1   0    8.66    2.12
  -2  -1   0    7.41    1.03
  -2  -1   0    6.51    1.68
   2  -1   0    8.24    1.72
  -2   1   0   10.65    1.96
  -2  -1   0    7.22    2.05
   2   1   0    6.80    1.78
  -2  -1  -1   89.98    4.53
  -2   1  -1   86.02    4.30
   2   1   1   89.39    4.15
  -2  -1  -2 1578.12   30.80
  -2   1  -2 1530.93   30.88
  -2  -1  -3 1063.89   23.01
  -2   1  -3 1035.97   23.15
  -2  -1  -4 2224.36   43.28
  -2   1  -4 2183.02   43.35
  -2   1  -5  368.27   12.05
  -2  -1  -5  354.51   11.79
  -2   1  -6 2770.59   54.65
  -2  -1  -6 2751.99   54.03
  -2   1  -7 1115.96   28.45
  -2   1  -7 1122.00   27.73
  -2  -1  -7 1179.61   28.04
  -2  -1  -7 1137.48   27.42
  -2  -1  -8  571.38   17.50
  -2  -1  -8  561.68   17.90
  -2   1  -8  560.71   18.35
  -2  -1  -9  669.24   20.13
  -2   1  -9  672.52   21.55
  -2  -1  -9  665.47   20.92
  -2  -1 -10 1173.94   31.90
  -2   1 -10 1195.90   32.60
  -2  -1 -11   52.96    6.37
  -2   1 -11   59.72    6.81
  -2   1 -12   71.44    7.90
  -2  -1 -12   70.89    7.42
  -2   1 -13   29.22    5.67
  -2  -1 -13   27.89    5.39
  -2   1 -14   34.52    6.44
  -2  -1 -14   33.09    6.55
  -2  -1 -15  111.71   10.44
  -2   1 -15  114.82   10.99
  -2   1 -16  373.00   20.31
  -2  -1 -16  329.78   18.88
  -2  -1 -17   69.31    9.36
  -2   1 -17   71.96    9.67
  -2  -1 -18  241.47   17.21
  -2   1 -18  308.96   19.54
   2  -2 -19   23.55    5.82
   2  -2 -18    0.75    4.04
   2   2 -18    0.88    4.40
   2  -2 -17  421.15   21.28
   2   2 -17  433.89   22.33
   2  -2 -16  236.02   15.13
   2   2 -16  276.95   17.04
   2  -2 -15  230.42   14.19
   2   2 -15  239.48   15.29
   2   2 -14  134.86   10.95
   2  -2 -14  124.23   10.17
   2   2 -13  378.93   17.73
   2  -2 -13  358.39   16.52
   2  -2 -12  667.94   22.80
   2   2 -12  705.80   24.39
   2   2 -11  522.13   19.54
   2  -2 -11  487.82   18.20
   2   2 -10  109.94    8.19
   2  -2 -10   97.17    7.33
   2   2  -9  202.00   10.67
   2  -2  -9  191.98    9.64
   2   2  -8   45.04    4.99
   2  -2  -8   60.95    5.18
  -2   2   7  891.72   17.82
   2   2  -7  889.68   23.36
   2  -2  -7  867.98   22.17
   2   2  -6   42.52    4.42
  -2   2   6   45.74    2.23
   2  -2  -6   43.07    3.92
   2  -2  -5 1686.96   34.34
   2   2  -5 1717.49   35.65
   2   2  -4  140.56    6.46
   2  -2  -4  157.44    6.24
   2   2  -3 1673.86   32.75
  -2   2   3 1640.01   28.69
   2  -2  -3 1653.38   31.89
   2  -2  -2  308.47    6.82
   2  -2  -2  298.35    8.51
   2   2  -2  293.50    8.85
  -2   2   2  312.13    6.90
   2   2  -1 1243.09   22.91
  -2   2   1 1279.09   23.19
   2  -2  -1 1219.72   21.75
   2  -2  -1 1191.40   24.14
   2   2  -1 1220.92   24.36
   2  -2  -1 1230.85   23.15
   2  -2   0 3566.14   62.04
  -2  -2   0 3454.62   62.33
  -2  -2   0 3176.45   60.27
  -2  -2   0 3564.06   61.87
   2   2   0 3582.24   60.54
   2   2   0 3579.68   61.84
  -2   2   0 3549.07   61.59
   2  -2   0 3664.04   61.71
  -2   2  -1 1931.29   36.19
   2   2   1 1919.77   35.67
  -2  -2  -1 1893.04   36.36
  -2   2  -2  728.18   16.90
  -2  -2  -2  706.77   16.86
  -2  -2  -3   28.45    3.19
  -2   2  -3   28.41    3.45
  -2   2  -4  180.01    7.89
  -2  -2  -4  180.48    7.45
  -2   2  -5   26.48    3.65
  -2  -2  -5   27.81    3.25
  -2  -2  -6    9.20    2.40
  -2  -2  -7   33.79    3.97
  -2  -2  -7   39.46    4.23
  -2   2  -7   38.07    4.93
  -2   2  -8   21.46    4.04
  -2  -2  -8   17.71    3.36
  -2  -2  -8   22.27    3.67
  -2   2  -9  435.67   16.89
  -2  -2  -9  445.29   15.30
  -2  -2  -9  442.21   16.13
  -2  -2 -10  313.31   13.24
  -2  -2 -10  339.26   14.58
  -2   2 -10  369.31   15.86
  -2  -2 -11  464.24   18.13
  -2   2 -11  481.71   19.35
  -2  -2 -12  243.30   13.11
  -2   2 -12  222.87   13.56
  -2  -2 -13  130.53   10.16
  -2   2 -13  149.08   11.42
  -2   2 -14  626.96   25.00
  -2  -2 -14  549.52   22.74
  -2  -2 -15  570.63   23.87
  -2   2 -15  555.91   24.51
  -2   2 -16  143.34   12.64
  -2  -2 -16  178.76   13.49
  -2  -2 -17    6.08    4.99
  -2   2 -17   -2.13    4.47
  -2  -2 -18    2.01    3.88
   2  -3 -19  216.42   15.83
   2  -3 -18   12.76    5.06
   2   3 -18   22.01    6.48
   2   3 -17  481.77   23.94
   2  -3 -17  475.62   22.27
   2   3 -16   12.98    5.17
   2  -3 -16   17.73    4.93
   2  -3 -15    3.44    3.62
   2   3 -15   -5.57    3.71
   2  -3 -14  128.41   10.09
   2   3 -14  132.61   11.01
   2   3 -13  357.35   17.62
   2  -3 -13  396.06   17.10
   2  -3 -12   45.35    5.78
   2   3 -12   43.99    6.34
   2   3 -11  508.93   19.67
   2  -3 -11  506.99   18.17
   2  -3 -10  303.82   12.94
   2   3 -10  296.52   14.00
   2  -3  -9  259.53   11.10
   2   3  -9  249.28   12.03
  -2   3   8   85.85    3.41
   2   3  -8   85.34    6.74
   2  -3  -8   91.18    6.18
   2   3  -7  744.50   21.29
  -2   3   7  767.04   14.79
   2  -3  -7  772.85   19.96
   2   3  -6  104.68    6.67
   2  -3  -6  121.38    6.10
   2  -3  -5  892.98   20.49
   2   3  -5  902.64   22.00
   2  -3  -4  512.97   12.90
   2   3  -4  481.10   13.79
   2   3  -3  826.38   18.62
   2  -3  -3  776.60   17.33
  -2   3   2    2.85    1.02
   2   3  -2    0.76    1.85
   2  -3  -2    2.43    0.90
   2  -3  -2    5.09    1.78
   2  -3  -2    1.97    1.09
  -2   3   1 2452.78   44.05
   2  -3  -1 2532.26   44.20
   2  -3  -1 2494.12   43.41
   2   3  -1 2402.00   45.20
   2  -3  -1 2438.92   45.02
   2   3  -1 2410.42   44.54
  -2   3   1 2579.67   43.43
  -2  -3   0 5677.52   96.25
  -2   3   0 5577.16   95.11
   2   3   0 5528.60   94.97
  -2  -3   0 5547.31   94.63
   2   3   0 5247.88   94.55
  -2  -3  -1 1139.74   24.02
  -2   3  -1 1145.72   23.78
  -2  -3  -1 1182.60   22.82
   2   3   1 1135.80   22.82
  -2   3  -2  326.88    9.93
  -2  -3  -2  302.45    9.56
  -2   3  -3 1851.02   37.39
  -2  -3  -3 1860.13   36.87
  -2  -3  -4   -1.91    2.05
  -2  -3  -5 2446.23   47.96
  -2  -3  -6   27.90    3.46
  -2  -3  -7  367.37   12.72
  -2  -3  -7  374.11   12.90
  -2   3  -7  370.32   14.24
  -2  -3  -8  253.89   10.81
  -2   3  -8  249.24   11.83
  -2  -3  -8  255.44   10.69
  -2   3  -9  941.05   27.43
  -2  -3  -9  948.37   25.64
  -2  -3  -9  914.70   24.60
  -2  -3 -10    1.06    2.21
  -2  -3 -10    3.74    3.02
  -2   3 -10    5.67    3.53
  -2   3 -11   19.22    4.75
  -2  -3 -11   18.02    4.34
  -2  -3 -12    4.95    3.34
  -2   3 -12    6.46    4.29
  -2  -3 -13  192.25   12.12
  -2   3 -13  166.67   12.39
  -2  -3 -14   -1.68    3.38
  -2   3 -14    0.34    3.88
  -2  -3 -15  207.93   13.88
  -2   3 -15  191.73   14.25
  -2  -3 -16   73.54    8.90
  -2   3 -16   87.79   10.32
  -2  -3 -17  396.81   20.71
  -2   3 -17  399.80   22.11
  -2  -3 -18    7.17    4.87
   2   4 -18   12.50    6.40
   2  -4 -18    5.00    4.17
   2  -4 -17   84.42    9.25
   2   4 -17   90.87   10.77
   2   4 -16   27.86    6.16
   2  -4 -16   31.01    6.03
   2  -4 -15  315.85   16.46
   2   4 -15  358.84   18.99
   2   4 -14  208.57   14.00
   2  -4 -14  185.12   11.80
   2   4 -13  820.47   28.13
   2  -4 -13  772.96   25.49
   2   4 -12    5.29    4.04
   2  -4 -12    2.40    2.77
   2  -4 -11  954.08   26.97
   2   4 -11  982.09   29.43
   2   4 -10    2.77    3.40
   2  -4 -10    4.81    2.70
   2   4  -9   90.34    7.57
  -2   4   9   87.42    3.31
   2  -4  -9   98.32    6.53
  -2   4   8   18.15    1.17
   2  -4  -8   16.37    2.88
   2   4  -8   14.57    3.48
   2   4  -7  190.94    9.54
   2  -4  -7  192.80    8.29
   2   4  -6  105.72    6.65
   2  -4  -6  105.41    5.59
   2  -4  -5  736.15   17.48
   2   4  -5  745.60   19.44
   2  -4  -4  119.09    5.22
   2   4  -4  124.24    6.26
   2   4  -3  253.76    8.73
   2  -4  -3  248.70    7.63
   2   4  -2 2109.05   38.89
   2  -4  -2 2024.98   37.52
   2  -4  -2 1893.41   36.94
   2  -4  -2 2094.84   36.14
   2  -4  -1 3912.13   67.28
   2  -4  -1 3954.40   67.15
   2   4  -1 3789.50   68.24
   2   4  -1 3796.30   68.27
   2  -4  -1 3737.96   67.82
  -2   4   1 3892.56   67.03
   2   4   0 4179.50   74.07
  -2   4   0 4324.83   73.19
   2   4   0 4095.42   73.54
   2   4   1   62.26    3.45
  -2  -4  -1   71.90    3.42
  -2  -4  -1   77.14    4.65
  -2  -4  -2  175.40    7.01
  -2  -4  -3 2044.38   40.22
  -2  -4  -4  697.21   17.63
  -2  -4  -5  121.21    6.36
  -2  -4  -6  340.94   11.75
  -2   4  -7   42.98    5.00
  -2  -4  -7   55.92    4.72
  -2  -4  -7   44.71    4.35
  -2  -4  -8   15.93    3.16
  -2   4  -8   10.03    3.79
  -2  -4  -8   19.49    3.23
  -2  -4  -9   26.23    3.90
  -2  -4  -9   28.33    3.90
  -2   4  -9   27.18    5.10
  -2  -4 -10    6.63    2.90
  -2  -4 -10   11.35    3.47
  -2   4 -10   15.44    4.53
  -2   4 -11 1395.73   38.85
  -2  -4 -11 1423.09   34.75
  -2  -4 -11 1436.89   36.45
  -2  -4 -12  108.62    8.64
  -2   4 -12  100.64    9.20
  -2   4 -13  437.84   20.41
  -2  -4 -13  436.45   18.53
  -2  -4 -14   16.91    4.76
  -2   4 -14   17.41    5.51
  -2  -4 -15  658.63   25.33
  -2   4 -15  633.50   27.10
  -2  -4 -16   52.38    7.62
  -2   4 -16   47.81    8.25
  -2  -4 -17   13.18    4.63
  -2   4 -17   14.40    5.71
   2   5 -18   56.01    9.36
   2   5 -17  263.12   17.80
   2  -5 -17  278.43   16.25
   2  -5 -16  100.57    9.50
   2   5 -16  113.73   11.47
   2  -5 -15   14.18    3.91
   2   5 -15   16.60    5.54
   2  -5 -14   38.47    5.83
   2   5 -14   42.10    7.29
   2  -5 -13    3.08    2.97
   2   5 -13   12.18    4.99
   2  -5 -12    9.93    3.53
   2   5 -12    4.11    3.92
   2  -5 -11  153.45    9.14
   2   5 -11  140.99   10.38
   2   5 -10  235.10   12.62
   2  -5 -10  247.45   11.13
   2   5  -9  427.72   16.72
   2  -5  -9  422.26   14.40
   2   5  -8  856.93   24.35
   2  -5  -8  817.29   21.25
   2   5  -7 2209.17   47.99
   2  -5  -7 2278.82   44.91
   2   5  -6 1429.12   32.60
   2  -5  -6 1403.50   29.67
   2  -5  -5    1.45    1.54
   2   5  -5    4.22    2.58
   2  -5  -4  261.57    8.04
   2   5  -4  242.31    9.36
   2  -5  -3  234.80    5.57
   2  -5  -3  238.44    7.20
   2   5  -3  217.05    8.25
   2   5  -2 1546.60   30.99
   2  -5  -2 1601.48   28.84
   2  -5  -2 1499.88   29.60
   2   5  -1    8.62    1.93
  -2   5   1    3.44    1.48
   2   5  -1    3.91    1.99
   2   5   0   16.87    2.69
  -2   5   0   17.50    2.10
   2   5   0   21.20    2.16
   2   5   1 2951.37   55.27
  -2  -5  -1 2953.91   55.89
  -2  -5  -1 3068.32   53.35
   2   5   1 2986.72   53.37
  -2  -5  -2  107.17    5.61
  -2  -5  -3   69.75    4.69
  -2  -5  -4  970.54   22.86
  -2  -5  -5 3625.48   68.10
  -2   5  -6  727.24   21.45
  -2  -5  -6  757.36   19.57
  -2  -5  -7  282.75   10.38
  -2  -5  -7  265.47   10.55
  -2   5  -7  263.33   12.05
  -2  -5  -8  198.53    9.38
  -2   5  -8  207.06   11.20
  -2  -5  -8  218.71    9.63
  -2  -5  -9  551.46   17.43
  -2   5  -9  535.03   20.08
  -2  -5  -9  585.80   18.19
  -2  -5 -10 1044.08   27.65
  -2   5 -10  941.39   29.87
  -2  -5 -10 1020.49   26.57
  -2  -5 -11   61.16    6.20
  -2   5 -11   74.50    8.09
  -2  -5 -11   67.69    6.27
  -2   5 -12  201.63   13.31
  -2  -5 -12  192.35   11.26
  -2  -5 -13   27.14    4.80
  -2   5 -13   26.34    6.37
  -2  -5 -14   64.47    7.43
  -2   5 -14   59.85    8.32
  -2   5 -15    2.22    4.44
  -2  -5 -15    6.05    3.93
  -2   5 -16   94.41   10.64
  -2  -5 -16   78.26    8.54
  -2   5 -17  144.97   13.81
   2   6 -17    6.86    5.38
   2   6 -16  318.22   19.00
   2   6 -15   92.15   10.29
   2  -6 -15   90.60    8.45
   2   6 -14  103.40   10.33
   2  -6 -14   99.97    8.36
   2  -6 -13   16.40    3.84
   2   6 -13   12.38    4.89
   2   6 -12 1188.17   34.98
   2  -6 -12 1147.73   30.89
   2  -6 -11   19.35    3.82
   2   6 -11   17.38    4.60
   2  -6 -10  477.91   15.86
   2   6 -10  434.32   17.92
   2   6  -9   77.15    7.19
   2  -6  -9   99.28    6.32
   2   6  -8  577.79   19.32
   2  -6  -8  576.37   16.39
   2  -6  -7    1.90    1.57
   2   6  -7    6.25    3.53
   2   6  -6  107.17    7.01
   2  -6  -6   98.23    5.17
   2  -6  -5  134.93    5.76
   2   6  -5  138.22    7.42
   2  -6  -4  219.12    7.13
   2   6  -4  216.00    8.78
   2  -6  -4  217.11    5.06
   2   6  -3    9.51    2.25
   2  -6  -3   14.42    2.00
   2   6  -2  719.72   17.07
   2  -6  -2  711.36   15.70
   2   6  -2  728.11   17.95
  -2   6   2  743.76   16.87
  -2   6   1 1132.08   23.65
   2   6  -1 1124.56   24.81
   2   6  -1 1148.69   23.41
  -2   6   0 3150.99   56.98
   2   6   0 3068.44   55.72
   2   6   0 3156.15   58.19
   2   6   1    4.98    2.17
   2   6   1    4.85    1.47
  -2  -6  -1    5.43    1.28
  -2  -6  -2 2762.63   48.66
  -2  -6  -2 2632.76   51.94
  -2  -6  -3  783.90   19.43
  -2  -6  -4 1879.99   38.69
  -2  -6  -5   48.58    4.33
  -2   6  -6  127.26    8.06
  -2  -6  -6  117.79    6.74
  -2  -6  -7  151.47    7.25
  -2   6  -7  137.10    8.77
  -2  -6  -7  148.41    7.75
  -2  -6  -8    1.46    1.93
  -2   6  -8    0.43    3.20
  -2  -6  -8    1.99    2.10
  -2  -6  -9   35.14    4.23
  -2   6  -9   39.37    5.61
  -2  -6  -9   34.86    4.30
  -2  -6 -10 1126.79   29.28
  -2  -6 -10 1215.14   30.28
  -2   6 -10 1223.29   34.40
  -2  -6 -11  343.48   14.40
  -2   6 -11  337.33   17.07
  -2  -6 -11  359.38   14.07
  -2  -6 -12  233.61   12.22
  -2  -6 -12  217.29   11.04
  -2   6 -12  267.14   15.19
  -2  -6 -13   28.85    4.71
  -2   6 -13   36.46    6.27
  -2   6 -14  512.89   23.65
  -2  -6 -14  497.02   20.23
  -2   6 -15   62.18    8.95
  -2  -6 -15   68.83    7.68
  -2   6 -16  204.80   16.12
  -2   6 -17  109.91   12.30
   2   7 -17    3.77    5.26
   2   7 -16   12.51    5.66
   2   7 -15    6.86    5.43
   2  -7 -14   76.16    7.39
   2   7 -14   54.71    8.28
   2   7 -13   44.21    6.88
   2  -7 -13   71.67    6.93
   2  -7 -12    4.37    2.74
   2   7 -12    5.72    3.82
   2  -7 -11   27.41    4.07
   2   7 -11   21.48    5.27
   2   7 -10 1257.00   34.65
   2  -7 -10 1232.47   30.13
   2   7  -9   19.05    4.43
   2  -7  -9   14.15    2.83
   2  -7  -8  149.66    7.21
   2   7  -8  127.65    8.79
   2   7  -7   98.83    7.14
   2  -7  -7  101.38    5.49
   2  -7  -6 4648.01   82.80
   2   7  -6 4609.39   87.66
   2   7  -5  479.92   15.24
   2  -7  -5  481.71   12.28
   2  -7  -4  662.16   14.85
   2   7  -4  625.73   17.48
   2   7  -3   95.34    5.41
   2  -7  -3   93.92    4.12
   2   7  -2  534.51   13.84
  -2   7   2  541.63   14.07
   2   7  -2  496.38   14.72
  -2   7   1  456.69   12.63
   2   7  -1  457.79   11.83
   2   7  -1  465.41   13.63
  -2   7   0   15.57    2.53
   2   7   0   26.53    3.50
   2   7   0   22.27    2.21
  -2  -7  -1  774.73   16.19
   2   7   1  794.23   16.36
   2   7   1  758.88   19.45
  -2  -7  -2 1124.43   22.01
  -2  -7  -2 1144.64   25.87
  -2  -7  -3  291.01   10.45
  -2  -7  -4 1890.45   39.28
  -2  -7  -5    7.12    2.57
  -2  -7  -6 1054.17   25.43
  -2  -7  -6 1054.27   23.36
  -2   7  -6 1033.58   27.39
  -2  -7  -7   92.18    5.35
  -2   7  -7   88.76    7.36
  -2  -7  -7   85.66    5.90
  -2  -7  -8  785.86   20.35
  -2  -7  -8  755.99   20.93
  -2   7  -8  729.03   23.69
  -2  -7  -9  131.76    7.88
  -2   7  -9  124.16    9.44
  -2  -7  -9  139.97    7.75
  -2  -7 -10  220.43   10.44
  -2  -7 -10  202.37   10.02
  -2   7 -10  230.84   13.45
  -2   7 -11   95.46    9.26
  -2  -7 -11  111.77    7.76
  -2  -7 -11  104.56    7.23
  -2  -7 -12    2.85    2.71
  -2   7 -12    4.31    4.39
  -2   7 -13   40.70    7.09
  -2  -7 -13   40.40    5.54
  -2   7 -14   56.07    8.03
  -2   7 -15    2.03    4.19
  -2   7 -16  538.38   26.14
   2   8 -17   20.53    7.63
   2   8 -16  377.07   21.29
   2   8 -15  169.56   13.68
   2   8 -14   17.26    5.54
   2   8 -13  163.76   12.57
   2  -8 -13  174.43   10.21
   2  -8 -12 1334.50   33.40
   2   8 -12 1316.90   38.67
   2  -8 -11  224.02   10.57
   2   8 -11  228.99   13.42
   2  -8 -10   31.53    3.96
   2   8 -10   16.59    4.48
   2  -8  -9  503.20   15.38
   2   8  -9  540.97   19.68
   2   8  -8  219.82   11.64
   2  -8  -8  225.61    8.93
   2  -8  -7  129.48    6.10
   2   8  -7  123.81    8.27
   2   8  -6   13.11    3.41
   2  -8  -6    9.92    1.87
   2   8  -5   14.43    3.32
   2  -8  -5   15.62    1.32
   2  -8  -5   13.95    1.92
   2  -8  -4  601.86   13.56
   2   8  -4  560.36   16.50
  -2   8   3  178.18    5.67
   2  -8  -3  177.70    5.78
   2   8  -3  170.76    7.54
   2   8  -2  695.35   17.06
   2   8  -2  705.15   18.90
  -2   8   2  703.52   17.96
   2   8  -1 3222.28   57.79
  -2   8   1 3151.79   59.47
   2   8  -1 3108.68   60.62
   2   8   0 4548.70   82.52
   2   8   0 4445.88   78.40
  -2   8   0 4422.16   81.20
  -2  -8  -1  913.03   18.38
   2   8   1  939.06   22.90
   2   8   1  934.26   18.59
  -2   8  -1  836.45   21.37
  -2  -8  -2 1504.22   28.05
  -2  -8  -3 1294.11   24.62
  -2  -8  -3 1268.48   29.12
  -2  -8  -4 1152.74   27.13
  -2  -8  -5  557.16   16.37
  -2   8  -5  531.39   17.28
  -2  -8  -6   47.08    4.40
  -2   8  -6   37.42    4.70
  -2  -8  -6   44.87    3.40
  -2  -8  -7    0.86    2.05
  -2  -8  -7    0.09    1.64
  -2   8  -7    0.23    2.88
  -2  -8  -8   14.86    2.63
  -2   8  -8   21.34    4.82
  -2  -8  -8   18.22    3.36
  -2  -8  -9   39.94    4.59
  -2   8  -9   32.36    5.39
  -2  -8  -9   32.12    3.73
  -2  -8 -10 1046.71   27.25
  -2  -8 -10 1059.34   26.79
  -2   8 -10  976.49   31.27
  -2  -8 -11  276.22   12.28
  -2   8 -11  308.74   16.25
  -2  -8 -11  305.34   12.85
  -2   8 -12  118.21   10.54
  -2  -8 -12  120.53    8.32
  -2   8 -13   50.56    8.28
  -2   8 -14  716.46   29.13
  -2   8 -15   87.66   10.60
  -2   8 -16  138.01   13.23
   2   9 -17  189.19   15.77
   2   9 -16   -5.97    5.36
   2   9 -15   82.54    9.97
   2   9 -14    5.46    4.53
   2   9 -13    0.49    4.15
   2   9 -12    5.47    4.65
   2  -9 -11  240.21   10.64
   2   9 -11  235.03   14.02
   2  -9 -10  265.52   10.66
   2   9 -10  252.87   13.84
   2  -9  -9 1068.00   25.11
   2   9  -9 1048.25   30.46
   2   9  -8   61.89    6.28
   2  -9  -8   58.74    4.30
   2  -9  -7 2607.36   48.95
   2   9  -7 2562.89   55.20
   2  -9  -6 1004.41   19.21
   2  -9  -6 1073.44   21.99
   2   9  -6 1049.43   27.13
   2   9  -5  428.62   14.73
   2  -9  -5  450.58   11.07
   2  -9  -4  137.43    4.86
   2   9  -4  133.33    7.20
  -2   9   4  129.73    4.66
   2   9  -3  883.07   23.54
   2   9  -3  886.34   21.66
  -2   9   3  913.13   18.22
   2   9  -2  197.20    7.65
   2   9  -2  181.83    8.91
  -2   9   2  193.39    8.38
  -2   9   1  370.17   12.15
   2   9  -1  376.60   10.56
   2   9  -1  366.45   12.99
   2   9   0  170.27    6.04
  -2   9   0  167.50    7.79
   2   9   0  165.38    8.31
  -2   9  -1  191.66    8.61
   2   9   1  210.45    9.48
   2   9   1  209.82    6.36
  -2  -9  -1  220.15    6.26
  -2  -9  -2   75.01    3.11
  -2  -9  -3   36.50    3.85
  -2  -9  -3   36.60    2.10
  -2  -9  -4  373.58    9.20
  -2  -9  -4  388.09   13.14
  -2   9  -4  371.61   13.44
  -2   9  -5 2558.55   53.46
  -2  -9  -5 2511.52   51.80
  -2  -9  -5 2584.41   46.74
  -2  -9  -6  214.19    9.79
  -2  -9  -6  200.16    7.14
  -2   9  -6  212.65   10.78
  -2  -9  -7  157.66    8.32
  -2  -9  -7  142.55    6.38
  -2   9  -7  150.19    9.59
  -2  -9  -8  298.18   11.92
  -2  -9  -8  286.89   10.14
  -2   9  -8  280.04   13.99
  -2   9  -9  522.80   20.85
  -2  -9  -9  568.87   16.43
  -2  -9  -9  552.97   17.78
  -2  -9 -10  347.90   13.81
  -2   9 -10  350.91   17.25
  -2  -9 -10  379.31   13.40
  -2   9 -11  223.01   14.05
  -2   9 -12   19.23    5.48
  -2   9 -13   26.07    6.35
  -2   9 -14   17.17    5.79
  -2   9 -15   28.39    7.02
  -2   9 -16  150.80   13.94
   2  10 -16    7.65    4.79
   2  10 -15  544.94   25.57
   2  10 -14    2.80    4.45
   2  10 -13  733.55   28.26
   2  10 -12   12.03    4.57
   2  10 -11 1097.13   33.73
   2  10 -10   -3.61    4.11
   2 -10  -9  582.82   16.20
   2  10  -9  585.55   21.43
   2 -10  -8   29.43    2.90
   2  10  -8   32.03    5.16
   2 -10  -7   47.84    3.38
   2  10  -7   49.24    5.77
   2 -10  -6   62.54    2.96
   2  10  -6   54.71    5.48
   2 -10  -6   63.95    3.53
  -2  10   5  702.42   15.18
   2 -10  -5  730.74   15.44
   2  10  -5  742.21   20.81
   2  10  -4   43.19    4.41
  -2  10   4   45.56    2.46
   2  10  -3  488.97   14.46
   2  10  -3  483.92   16.39
  -2  10   3  491.77   11.04
   2  10  -2   12.26    3.15
   2  10  -2    4.68    2.04
  -2  10   2    4.23    2.38
   2  10  -1 3894.85   74.99
  -2  10   1 3892.82   73.83
   2  10  -1 3926.11   70.49
   2  10   0   56.83    5.43
   2  10   0   57.27    3.48
  -2  10   0   54.85    4.88
   2  10   1  835.58   17.24
  -2  10  -1  872.97   22.36
  -2 -10  -1  821.02   17.08
   2  10   1  861.71   23.01
  -2  10  -2   78.61    5.85
  -2 -10  -2   72.06    2.93
  -2 -10  -3 1399.29   25.68
  -2 -10  -3 1449.12   32.81
  -2  10  -3 1417.41   31.88
  -2 -10  -4  214.54    5.80
  -2 -10  -4  222.52    9.94
  -2  10  -4  230.30   10.19
  -2  10  -5  146.10    8.56
  -2 -10  -5  132.80    7.61
  -2 -10  -5  145.61    4.88
  -2 -10  -6   27.45    2.34
  -2  10  -6   32.97    4.86
  -2 -10  -6   26.57    3.88
  -2 -10  -7  395.62   14.47
  -2  10  -7  392.29   16.56
  -2 -10  -7  443.63   11.76
  -2 -10  -8    2.78    1.82
  -2 -10  -8    6.56    2.55
  -2  10  -8    2.38    3.79
  -2  10  -9  163.52   11.26
  -2 -10  -9  161.45    8.90
  -2 -10 -10    8.48    3.30
  -2  10 -10    5.43    4.33
  -2  10 -11 1446.04   41.57
  -2  10 -12   -0.83    4.48
  -2  10 -13  264.50   16.75
  -2  10 -14   27.70    7.01
  -2  10 -15  193.16   15.41
  -2  10 -16    3.95    4.54
   2  11 -16    7.47    5.03
   2  11 -15   -3.47    4.58
   2  11 -14   18.39    5.93
   2  11 -13   34.54    6.96
   2  11 -12   15.33    5.37
   2  11 -11  231.44   14.30
   2  11 -10  747.91   26.04
   2  11  -9  445.25   18.39
   2  11  -8  188.40   11.05
   2  11  -7 1568.68   38.43
   2 -11  -6  506.16   11.94
   2 -11  -6  485.07   11.47
   2  11  -6  502.96   17.40
   2  11  -5 1177.58   29.27
   2  11  -4    6.52    3.04
   2  11  -4   10.33    2.76
  -2  11   4    6.47    1.03
  -2  11   3  752.75   15.44
   2  11  -3  793.80   20.07
   2  11  -3  799.64   22.78
  -2  11   2    5.51    1.30
   2  11  -2    5.65    2.28
   2  11  -2    2.17    3.00
  -2  11   2    4.66    2.76
  -2  11   1  173.78    8.86
   2  11  -1  171.98    6.84
   2  11  -1  167.56    9.19
  -2  11   0   34.09    4.18
   2  11   0   37.05    2.83
   2  11   0   31.97    4.47
  -2  11  -1   44.07    4.54
  -2 -11  -1   40.69    2.44
   2  11   1   42.06    4.92
   2  11   1   39.55    2.46
   2  11   2  450.15   16.00
  -2  11  -2  461.64   15.52
  -2 -11  -2  439.06    9.51
  -2  11  -2  445.96   13.79
  -2  11  -3   21.61    3.43
  -2 -11  -3   11.23    0.88
  -2 -11  -3   11.01    2.95
  -2  11  -4  293.21   11.88
  -2 -11  -4  282.38    6.06
  -2 -11  -4  333.61   12.48
  -2 -11  -4  269.07    5.96
  -2  11  -5 1325.94   33.18
  -2 -11  -5 1343.94   24.62
  -2 -11  -5 1372.67   32.37
  -2  11  -6  199.40   10.81
  -2 -11  -6  198.19    9.81
  -2  11  -7  339.25   15.20
  -2 -11  -7  349.80   13.60
  -2 -11  -8  368.94   14.23
  -2  11  -8  419.33   17.67
  -2 -11  -9  948.53   25.49
  -2  11  -9  886.36   29.26
  -2  11 -10    9.84    4.35
  -2  11 -11   10.52    5.02
  -2  11 -12   16.62    5.98
  -2  11 -13   12.25    5.28
  -2  11 -14    9.66    5.36
  -2  11 -15   37.40    7.53
   2  12 -16  308.25   19.81
   2  12 -15  122.41   12.25
   2  12 -14  109.30   11.21
   2  12 -13  270.07   16.79
   2  12 -12  732.14   27.84
   2  12 -11  387.88   18.76
   2  12 -10   83.09    8.41
   2  12  -9    6.93    3.53
   2  12  -8  380.56   16.34
   2  12  -7  453.29   17.28
   2 -12  -6   24.92    2.43
   2  12  -6   25.69    4.03
   2  12  -5  435.41   15.33
   2  12  -4 1341.07   34.74
   2  12  -4 1419.17   32.31
   2  12  -3  488.45   14.87
   2  12  -3  535.96   18.20
  -2  12   3  479.95   10.34
  -2  12   2 1099.38   28.06
  -2  12   2 1098.09   21.78
   2  12  -2 1110.34   29.29
   2  12  -2 1116.49   25.12
   2  12  -1 1256.70   31.76
   2  12  -1 1264.98   26.63
  -2  12   1 1231.66   30.55
   2  12   0 2130.56   39.70
  -2  12   0 2081.10   40.81
  -2  12   0 2115.61   45.64
   2  12   0 2090.36   46.66
   2  12   1  566.81   18.60
  -2 -12  -1  517.10   11.79
  -2  12  -1  543.13   17.71
   2  12   1  536.24   11.96
  -2  12  -1  542.07   14.80
   2  12   2  540.02   17.90
  -2 -12  -2  459.82    9.55
  -2  12  -2  526.50   17.43
  -2  12  -2  512.49   14.90
  -2  12  -3  402.69   15.41
  -2 -12  -3  401.64   14.92
  -2  12  -3  409.65   14.01
  -2  12  -4  119.10    7.77
  -2 -12  -4  119.34    7.68
  -2 -12  -5   47.75    4.86
  -2  12  -5   59.35    5.85
  -2 -12  -6    6.00    2.72
  -2  12  -6   -0.93    3.02
  -2 -12  -7    5.05    2.88
  -2  12  -7    0.55    3.34
  -2  12  -8  126.34    9.69
  -2 -12  -8  135.00    8.22
  -2 -12  -9  121.61    7.94
  -2  12  -9  125.91   10.19
  -2  12 -10  670.19   25.58
  -2  12 -11  185.65   13.23
  -2  12 -12  194.36   14.17
  -2  12 -13   -0.94    3.99
  -2  12 -14  289.97   18.61
  -2  12 -15  127.44   13.10
   2  13 -15    1.69    4.78
   2  13 -14   36.55    7.41
   2  13 -13   80.83    9.39
   2  13 -12   -1.28    4.06
   2  13 -11  273.65   15.76
   2  13 -10  237.18   14.01
   2  13  -9   10.72    4.21
   2  13  -8  443.60   18.18
   2  13  -7   64.68    6.69
   2  13  -6 1657.77   39.49
   2  13  -5  243.61   11.12
   2  13  -5  259.95   13.10
   2  13  -4  476.13   18.23
   2  13  -4  491.07   15.87
   2  13  -3    4.82    2.13
   2  13  -3    4.67    3.55
   2  13  -2  671.81   17.24
  -2  13   2  632.01   13.78
  -2  13   2  619.98   20.06
   2  13  -2  648.02   21.10
   2  13  -1  194.08   10.81
  -2  13   1  199.28    6.82
   2  13  -1  198.15    7.61
  -2  13   1  195.60   10.18
   2  13   0   32.53    2.65
  -2  13   0   42.11    5.23
  -2  13   0   31.41    3.06
   2  13   0   31.40    5.04
  -2  13  -1   14.08    3.54
  -2  13  -1   14.58    2.53
   2  13   1    8.51    3.33
   2  13   1   16.56    1.55
  -2  13  -2  175.16    8.27
   2  13   2  179.17   10.41
  -2  13  -2  175.67    9.95
  -2  13  -3    4.97    2.19
  -2  13  -3    7.62    3.22
  -2  13  -4  833.37   23.38
  -2 -13  -4  805.78   23.75
  -2  13  -5   40.43    4.98
  -2 -13  -5   41.55    4.86
  -2 -13  -6 1073.61   28.38
  -2  13  -6 1042.59   29.71
  -2 -13  -7   25.17    4.56
  -2  13  -7   13.55    4.24
  -2  13  -8  547.91   21.28
  -2 -13  -8  553.77   18.66
  -2  13  -9  138.00   10.72
  -2  13 -10  199.18   13.62
  -2  13 -11   21.12    5.96
  -2  13 -12   -0.10    4.04
  -2  13 -13   41.58    7.36
  -2  13 -14    6.83    4.83
  -2  13 -15   55.71    9.37
   2  14 -15  112.56   12.22
   2  14 -14  253.83   17.25
   2  14 -13    7.25    4.13
   2  14 -12  455.47   21.78
   2  14 -11    9.57    4.63
   2  14 -10  269.27   15.16
   2  14  -9   99.03    8.97
   2  14  -8  378.89   16.75
   2  14  -7    4.00    3.18
   2  14  -6   -0.23    3.67
   2  14  -6    2.34    2.69
   2  14  -5   11.53    3.15
   2  14  -5   13.34    4.31
   2  14  -4   86.72    6.29
   2  14  -4   78.35    7.60
   2  14  -3  181.75    8.54
   2  14  -3  173.29   10.80
   2  14  -2 1100.73   25.28
   2  14  -2 1093.00   30.52
  -2  14   2 1080.35   29.46
  -2  14   1  575.44   19.56
   2  14  -1  588.88   20.39
   2  14  -1  575.44   14.90
  -2  14   1  565.27   13.68
  -2  14   0 1651.86   33.39
  -2  14   0 1629.90   39.18
   2  14   0 1631.74   31.81
   2  14   0 1663.76   40.67
  -2  14  -1   25.82    4.34
  -2  14  -1   25.23    3.17
   2  14   1   27.13    4.95
   2  14   2  219.33   12.15
  -2  14  -2  238.82    9.94
  -2  14  -2  222.70   11.72
  -2  14  -3  116.86    8.69
  -2  14  -3  121.02    7.48
  -2  14  -4  763.95   24.83
  -2  14  -4  792.14   23.00
  -2 -14  -4  800.32   23.89
  -2 -14  -5  238.67   11.58
  -2  14  -5  234.10   11.75
  -2 -14  -6   81.04    6.71
  -2  14  -6   75.91    7.06
  -2  14  -7   -1.98    3.55
  -2 -14  -7    5.77    2.99
  -2  14  -8   24.88    5.23
  -2 -14  -8   16.00    3.34
  -2  14  -9   13.43    4.61
  -2  14 -10  253.58   15.39
  -2  14 -11  189.35   13.68
  -2  14 -12  393.10   20.77
  -2  14 -13  135.66   12.85
  -2  14 -14  183.99   15.26
   2  15 -15  105.16   11.99
   2  15 -14   22.78    6.56
   2  15 -13   22.77    6.02
   2  15 -12   -1.66    4.03
   2  15 -11   71.96    8.62
   2  15 -10  185.80   12.85
   2  15  -9  107.55    9.50
   2  15  -8  446.90   18.59
   2  15  -7  363.67   15.85
   2  15  -6  473.92   20.09
   2  15  -6  515.50   18.41
   2  15  -5  633.85   23.08
   2  15  -5  613.14   19.71
   2  15  -4  123.05    7.59
   2  15  -4  117.62    9.55
   2  15  -3  303.24   11.61
   2  15  -3  329.61   15.48
  -2  15   2  885.22   26.79
   2  15  -2  926.65   22.36
   2  15  -2  911.95   27.99
   2  15  -1   33.26    5.66
  -2  15   1   35.14    5.36
   2  15  -1   31.65    3.16
  -2  15   0  130.24    6.05
   2  15   0  157.00   10.41
  -2  15   0  139.74    9.47
  -2  15  -1   71.32    6.90
   2  15   1   79.47    7.45
  -2  15  -1   69.46    4.93
  -2  15  -2   13.82    2.77
   2  15   2   11.89    3.94
  -2  15  -2   15.41    4.19
  -2  15  -3  357.57   15.96
  -2  15  -3  375.88   13.86
  -2  15  -4  759.92   25.32
  -2  15  -4  779.86   22.96
  -2 -15  -4  782.60   24.16
  -2  15  -5  916.98   26.21
  -2 -15  -5  849.45   25.61
  -2  15  -5  831.80   27.40
  -2  15  -6  732.66   24.24
  -2 -15  -6  771.20   23.71
  -2 -15  -7  423.25   16.50
  -2  15  -7  389.19   17.32
  -2  15  -8   18.95    4.97
  -2  15  -9  433.38   19.86
  -2  15 -10  484.99   21.83
  -2  15 -11   57.38    8.13
  -2  15 -12    1.38    3.64
  -2  15 -13    2.23    4.85
  -2  15 -14    6.80    5.53
   2  16 -14   13.29    5.47
   2  16 -13  231.88   16.34
   2  16 -12   24.49    5.76
   2  16 -11  439.08   20.98
   2  16 -10   20.97    4.98
   2  16  -9   33.08    5.90
   2  16  -8   41.07    6.02
   2  16  -7  312.28   14.73
   2  16  -7  291.37   16.23
   2  16  -6   66.19    6.49
   2  16  -6   57.90    7.59
   2  16  -5   54.40    5.67
   2  16  -5   55.73    7.31
   2  16  -4    1.51    2.20
   2  16  -4    6.57    4.08
   2  16  -3   98.78    8.68
   2  16  -3   99.98    6.52
   2  16  -2  202.71   12.45
  -2  16   2  190.37   11.46
   2  16  -1  797.17   26.41
  -2  16   1  807.53   25.54
   2  16   0  339.43   16.04
  -2  16   0  341.58   15.47
  -2  16  -1  942.85   28.35
   2  16   1  913.80   28.81
  -2  16  -2   15.92    2.93
  -2  16  -2   11.02    3.85
  -2  16  -3  241.77   11.00
  -2  16  -3  250.43   13.60
  -2  16  -4  147.03    8.90
  -2  16  -4  135.59   10.29
  -2 -16  -4  114.76    8.75
  -2  16  -5   52.60    6.03
  -2  16  -5   50.70    6.70
  -2 -16  -5   44.89    5.51
  -2  16  -6  210.88   12.12
  -2 -16  -6  205.63   11.40
  -2  16  -7   20.03    4.50
  -2 -16  -7   29.13    4.90
  -2  16  -8    7.02    3.13
  -2  16  -9  119.09   10.33
  -2  16 -10   20.59    5.84
  -2  16 -11  310.88   18.13
  -2  16 -12    1.02    4.29
  -2  16 -13  311.09   19.59
   2  17 -14   -4.38    4.45
   2  17 -13  280.09   18.08
   2  17 -12   -6.49    4.80
   2  17 -11  183.81   13.47
   2  17 -10    9.77    4.43
   2  17  -9   92.60    8.85
   2  17  -8  174.75   11.73
   2  17  -8  157.73   12.51
   2  17  -7  484.94   19.04
   2  17  -7  480.99   21.53
   2  17  -6    3.21    2.74
   2  17  -6   12.91    5.49
   2  17  -5  809.54   28.47
   2  17  -5  836.85   24.27
   2  17  -4  132.78   10.69
   2  17  -3   77.47    8.02
   2  17  -2   39.63    6.22
  -2  17   2   33.91    5.62
   2  17  -1  346.70   16.79
  -2  17   1  333.13   15.89
  -2  17   0   33.50    5.62
   2  17   0   33.64    5.82
  -2  17  -1  104.91    8.95
   2  17   1  101.24    9.27
  -2  17  -2   20.85    4.62
  -2  17  -3  645.23   23.56
  -2 -17  -4   64.08    6.84
  -2  17  -4   67.48    7.73
  -2  17  -4   66.18    6.14
  -2 -17  -5  957.97   28.58
  -2  17  -5  955.62   30.91
  -2  17  -5  896.76   27.07
  -2 -17  -6   54.95    6.21
  -2  17  -6   58.10    7.89
  -2  17  -6   46.18    5.98
  -2  17  -7  420.21   18.36
  -2  17  -8   18.45    4.61
  -2  17  -9  414.34   19.74
  -2  17 -10    3.57    4.15
  -2  17 -11   12.20    5.30
  -2  17 -12   27.75    6.76
  -2  17 -13   20.85    6.67
   2  18 -13  121.46   12.05
   2  18 -12  163.65   13.32
   2  18 -11  285.97   16.95
   2  18 -10  128.43   11.39
   2  18 -10  159.01   13.38
   2  18  -9    9.01    3.92
   2  18  -9   11.64    5.80
   2  18  -8    8.27    5.38
   2  18  -8    2.62    3.14
   2  18  -7   46.70    7.67
   2  18  -7   43.74    5.94
   2  18  -6  132.41   11.45
   2  18  -5  360.46   18.43
   2  18  -4   32.45    6.04
   2  18  -3  197.24   13.15
  -2  18   2  323.47   15.99
   2  18  -2  300.60   16.20
   2  18  -1  482.19   21.17
  -2  18   1  518.85   20.85
   2  18   0  168.96   12.00
  -2  18   0  176.03   11.82
  -2  18  -1  305.49   15.67
   2  18   1  314.10   16.38
  -2  18  -2  127.29   10.21
  -2  18  -3  189.65   12.56
  -2 -18  -4  179.85   11.56
  -2  18  -4  207.28   13.41
  -2 -18  -5   21.06    4.12
  -2  18  -5   26.09    6.03
  -2  18  -6   24.87    6.04
  -2  18  -6   18.77    4.40
  -2 -18  -6   21.41    4.56
  -2  18  -7   -0.94    4.46
  -2  18  -7    2.83    3.49
  -2  18  -8   13.94    4.72
  -2  18  -9  130.30   11.24
  -2  18 -10   84.53    9.61
  -2  18 -11  216.09   15.50
  -2  18 -12  333.31   19.79
  -2  18 -13  112.85   12.08
   2  19 -13    0.77    5.08
   2  19 -12   -1.34    4.14
   2  19 -11   50.69    8.12
   2  19 -11   69.16   10.20
   2  19 -10   98.69   10.91
   2  19  -9    1.33    4.80
   2  19  -8  492.61   23.57
   2  19  -7   88.65   10.26
   2  19  -6  416.40   20.86
   2  19  -5   28.22    5.96
   2  19  -4  137.40   11.41
   2  19  -3   15.18    5.32
  -2  19   2  363.06   17.61
   2  19  -2  375.28   18.67
  -2  19   1    8.89    4.41
   2  19  -1    2.88    3.74
   2  19   0   45.71    7.18
  -2  19   0   40.14    6.38
  -2  19  -1   88.90    8.79
   2  19   1  104.41   10.03
  -2  19  -2   11.93    4.78
  -2  19  -3    0.78    3.41
  -2  19  -4  258.22   15.45
  -2 -19  -4  270.99   14.56
  -2 -19  -5  281.32   14.80
  -2  19  -5  301.86   16.93
  -2  19  -6  606.93   25.43
  -2  19  -7   15.39    5.03
  -2  19  -8  199.76   14.81
  -2  19  -9  107.18   11.17
  -2  19  -9   76.38    8.83
  -2  19 -10  282.86   17.08
  -2  19 -11    8.48    5.55
  -2  19 -12    9.93    5.72
   2  20 -10   62.29    9.36
   2  20  -9    2.55    4.43
   2  20  -8   48.87    8.17
   2  20  -7   13.52    5.47
   2  20  -6   95.77   10.28
   2  20  -5    5.20    4.11
   2  20  -4  191.89   13.85
   2  20  -3  144.26   12.18
  -2  20   2  311.24   16.72
   2  20  -2  286.58   16.99
  -2  20   1   45.31    7.00
   2  20  -1   27.22    6.08
   2  20   0  305.50   17.29
  -2  20   0  343.94   17.67
   2  20   1   94.19    9.83
  -2  20  -1   83.17    8.89
  -2  20  -2   62.67    7.96
  -2  20  -3   15.51    4.78
  -2 -20  -3   14.59    4.40
  -2  20  -4  248.89   15.56
  -2 -20  -4  231.99   13.97
  -2  20  -5    3.75    4.57
  -2  20  -6   43.16    7.32
  -2  20  -7   27.91    6.25
  -2  20  -8   51.75    8.35
  -2  20  -9   88.60   10.74
  -2  20 -10  489.49   25.02
   2  21  -9   93.49   11.34
   2  21  -8  116.81   12.20
   2  21  -7   81.20   10.15
   2  21  -6  532.36   24.83
   2  21  -5  330.70   18.96
   2  21  -4   88.34   10.17
   2  21  -3   23.16    5.95
   2  21  -2  114.06   11.19
   2  21  -1   52.95    8.43
  -2  21   1   55.35    7.81
  -2  21   0   23.20    5.96
   2  21   0   11.92    4.91
  -2  21  -1    3.91    3.66
   2  21   1    6.00    5.33
  -2  21  -2   57.59    8.20
  -2  21  -3  183.52   13.59
  -2 -21  -3  189.57   13.13
  -2  21  -4  210.44   14.53
  -2 -21  -4  186.91   12.71
  -2  21  -5   58.85    8.34
  -2  21  -6  213.10   15.34
  -2  21  -7  271.70   17.56
  -2  21  -8  182.26   14.95
  -2  21  -9   93.77   11.08
   2  22  -7   16.53    6.14
   2  22  -6    3.25    3.92
   2  22  -5   31.24    7.43
   2  22  -4  120.11   11.94
   2  22  -3  142.52   12.90
   2  22  -2    8.02    5.50
  -2  22   1  279.56   16.84
   2  22  -1  254.36   16.76
  -2  22   0   43.04    7.23
   2  22   0   35.26    7.31
  -2  22  -1  337.39   18.78
  -2  22  -2   70.00    8.84
  -2  22  -3  180.88   13.85
  -2 -22  -3  179.79   13.11
  -2  22  -4   87.76   10.06
  -2  22  -5   50.92    7.81
  -2  22  -6    2.50    4.82
  -2  22  -7   -5.87    4.49
   2  23  -5  215.33   16.09
   2  23  -4   10.17    4.73
   2  23  -3  131.06   12.44
   2  23  -2    6.31    4.35
  -2  23   1   38.61    7.52
   2  23  -1   16.36    5.64
   2  23   0   -0.67    4.85
  -2  23   0    5.65    5.10
  -2  23  -1   18.76    5.46
  -2  23  -2    3.81    4.68
  -2  23  -3   34.93    7.28
  -2  23  -4   32.19    7.15
  -2  23  -5  463.25   23.66
  -2  23  -6   11.39    5.22
   2  24  -2  133.85   13.17
   2  24  -1  374.52   21.53
  -2  24   0  107.46   11.40
   2  24   0  115.78   12.21
  -2  24  -1   63.91    8.96
  -2  24  -2  139.36   13.01
  -2  24  -3  256.03   17.48
   3   0 -18   -5.49    5.30
   3   0 -17  621.25   26.78
   3   0 -16    0.78    4.30
   3   0 -15  178.59   12.85
   3   0 -14   -2.46    3.65
   3   0 -13 1136.26   33.79
   3   0 -12    1.39    3.41
   3   0 -11  550.31   20.14
   3   0 -10   -1.82    3.00
   3   0  -9  112.15    7.98
   3   0  -8    2.48    2.80
   3   0  -7  535.51   16.78
   3   0  -6    2.10    2.61
   3   0  -5 2204.98   44.36
   3   0  -4   -1.20    2.32
   3   0  -3  496.18   13.87
  -3   0   3  510.07   12.25
  -3   0   2    2.50    1.80
   3   0  -2    3.48    1.85
  -3   0   1 2465.32   45.66
   3   0  -1 2438.44   46.43
   3   0   0    2.85    2.11
  -3   0   0   -0.05    1.69
  -3   0  -1  170.48    7.05
  -3   0  -2    1.70    2.35
  -3   0  -3   66.16    4.94
  -3   0  -4    4.61    2.90
  -3   0  -5   30.39    3.94
  -3   0  -6    1.42    2.42
  -3   0  -7   31.69    4.48
  -3   0  -8    2.47    2.42
  -3   0  -9 1337.48   34.70
  -3   0  -9 1362.26   34.28
  -3   0 -10   -1.17    2.94
  -3   0 -11  445.09   18.66
  -3   0 -12   -5.62    4.21
  -3   0 -13  256.88   14.98
  -3   0 -14    0.53    3.76
  -3   0 -15  474.07   22.38
  -3   0 -16    4.83    4.68
  -3   0 -17   -0.36    4.19
   3  -1 -18  136.89   12.64
   3   1 -18  134.71   12.94
   3   1 -17  439.45   22.35
   3  -1 -17  409.99   21.32
   3   1 -16  136.03   12.12
   3  -1 -16  151.72   12.31
   3  -1 -15   71.98    8.45
   3   1 -15   76.27    8.80
   3   1 -14    5.78    3.80
   3  -1 -14    5.71    3.31
   3   1 -13  113.47    9.74
   3  -1 -13  118.47    9.68
   3  -1 -12    5.83    3.98
   3   1 -12   -1.50    3.46
   3  -1 -11 1688.49   41.98
   3   1 -11 1782.94   43.23
   3   1 -10  208.23   11.46
   3  -1 -10  206.67   11.07
   3   1  -9  210.37   10.73
   3  -1  -9  191.55   10.11
   3   1  -8  736.95   21.58
   3  -1  -8  748.91   21.39
   3  -1  -7 2246.81   46.67
   3   1  -7 2218.07   47.07
   3  -1  -6  328.48   11.73
   3   1  -6  328.76   11.99
   3  -1  -5  867.49   21.61
   3   1  -5  906.18   22.12
   3   1  -4  316.30   11.08
   3  -1  -4  334.58   10.88
  -3   1   4  348.06    8.58
  -3   1   3   58.63    3.13
   3   1  -3   57.52    4.41
   3  -1  -3   51.62    4.12
   3   1  -2 1003.97   22.38
  -3   1   2  995.29   20.64
   3  -1  -2  965.05   22.06
  -3  -1   2 1034.46   21.42
  -3  -1   1  747.74   16.76
   3   1  -1  695.25   17.12
   3  -1  -1  697.35   17.00
  -3   1   1  694.42   16.06
   3   1  -1  719.70   13.51
  -3  -1   0  115.39    3.59
  -3  -1   0  110.95    5.52
   3  -1   0  111.11    5.66
  -3   1   0  112.60    5.33
   3   1   0  118.29    5.61
   3   1   1  475.99   12.94
  -3   1  -1  464.58   12.89
  -3  -1  -1  464.98   13.23
  -3   1  -2   26.04    3.46
  -3  -1  -2   18.06    3.11
  -3   1  -3  848.04   21.10
  -3  -1  -3  864.04   21.01
  -3   1  -4  792.33   20.42
  -3  -1  -4  768.38   20.09
  -3  -1  -5 2281.26   45.86
  -3   1  -5 2121.70   45.38
  -3  -1  -6  476.02   15.54
  -3   1  -6  443.38   15.33
  -3   1  -7  367.12   13.95
  -3  -1  -7  358.62   13.78
  -3   1  -8  122.09    8.02
  -3  -1  -8  120.87    7.96
  -3  -1  -9  340.82   14.60
  -3  -1  -9  355.73   14.48
  -3   1  -9  349.21   15.18
  -3  -1 -10  180.63   10.83
  -3   1 -10  193.15   11.51
  -3  -1 -10  177.55   10.41
  -3   1 -11   14.76    4.45
  -3  -1 -11   27.94    5.32
  -3   1 -12  103.38    9.62
  -3  -1 -12   92.84    8.64
  -3   1 -13    2.21    3.90
  -3  -1 -13    2.34    3.64
  -3   1 -14   -1.88    4.53
  -3  -1 -14    7.39    4.33
  -3   1 -15  379.70   20.18
  -3  -1 -15  387.85   19.93
  -3  -1 -16   60.98    8.38
  -3   1 -16   78.77    9.37
  -3   1 -17  102.45   11.26
  -3  -1 -17  115.16   11.65
   3  -2 -18    2.78    4.68
   3   2 -18    1.67    4.49
   3   2 -17   70.39    9.25
   3  -2 -17   78.46    9.60
   3   2 -16  384.79   20.21
   3  -2 -16  354.85   18.80
   3   2 -15  165.71   12.80
   3  -2 -15  187.12   12.86
   3   2 -14  248.30   15.10
   3  -2 -14  262.70   14.73
   3   2 -13  607.02   23.53
   3  -2 -13  643.95   23.13
   3   2 -12  281.58   14.77
   3  -2 -12  260.00   13.37
   3  -2 -11 1193.44   32.73
   3   2 -11 1271.49   34.31
   3   2 -10  402.09   16.40
   3  -2 -10  384.68   15.34
   3   2  -9  843.15   24.90
   3  -2  -9  877.18   24.24
   3   2  -8   47.08    5.41
   3  -2  -8   46.18    4.89
  -3   2   8   49.17    2.73
   3  -2  -7  423.83   14.09
   3   2  -7  410.70   14.54
   3  -2  -6  287.80   10.72
   3   2  -6  269.32   11.04
   3   2  -5  122.51    6.89
   3  -2  -5  133.88    6.73
  -3   2   5  135.85    4.14
   3   2  -4  191.09    8.21
  -3   2   4  182.37    5.22
   3  -2  -4  182.20    7.57
   3  -2  -3   20.28    3.04
   3   2  -3   24.42    3.37
  -3   2   3   21.32    1.93
   3  -2  -2 3270.56   58.05
   3   2  -2 3336.74   60.65
   3  -2  -2 3151.49   59.97
  -3   2   2 3268.47   57.95
  -3  -2   2 3302.22   59.87
   3  -2  -2 3415.93   55.68
   3  -2  -1 3200.35   57.83
  -3  -2   1 3202.18   57.79
   3   2  -1 2964.23   57.68
   3   2  -1 3133.73   54.52
  -3   2   1 3157.70   56.44
  -3  -2   0   14.22    2.89
   3   2   0    8.86    2.18
  -3   2   0    6.49    2.12
   3  -2   0    5.93    2.26
  -3  -2   0    7.13    1.37
   3   2   1  563.15   14.57
  -3  -2  -1  586.60   15.42
  -3   2  -1  580.96   15.00
  -3   2  -2  146.06    6.82
  -3  -2  -2  150.38    7.05
  -3  -2  -3  245.29    9.38
  -3   2  -3  234.62    9.27
  -3  -2  -4 1031.37   24.81
  -3   2  -4 1052.19   25.37
  -3   2  -5   17.61    3.51
  -3  -2  -5   22.94    3.67
  -3  -2  -6  255.26   10.95
  -3   2  -6  262.05   11.36
  -3   2  -7    3.91    3.12
  -3  -2  -7    3.50    2.84
  -3  -2  -8  209.77   10.54
  -3   2  -9   58.61    6.58
  -3  -2  -9   60.15    5.99
  -3  -2  -9   72.48    6.41
  -3   2 -10  625.66   22.35
  -3  -2 -10  626.95   21.41
  -3  -2 -10  642.85   21.06
  -3  -2 -11  273.38   13.41
  -3   2 -11  262.56   14.43
  -3  -2 -11  274.08   13.91
  -3   2 -12  165.46   11.88
  -3  -2 -12  158.22   11.11
  -3  -2 -13  131.63   10.48
  -3   2 -13  132.94   11.21
  -3   2 -14  102.57   10.54
  -3  -2 -14   88.24    9.02
  -3   2 -15  289.29   17.86
  -3  -2 -15  303.75   17.36
  -3   2 -16  245.52   16.76
  -3  -2 -16  211.80   15.16
  -3  -2 -17    7.39    4.75
  -3   2 -17    5.65    5.13
  -3  -2 -18    2.04    4.17
   3  -3 -19   11.77    4.99
   3  -3 -18  272.14   17.30
   3   3 -18  259.05   18.05
   3  -3 -17  124.59   11.46
   3   3 -17  167.80   13.90
   3  -3 -16  162.03   12.39
   3   3 -16  173.55   13.81
   3  -3 -15    7.22    4.37
   3   3 -15   10.55    5.21
   3   3 -14  116.73   10.27
   3  -3 -14  100.14    9.13
   3   3 -13   56.22    7.44
   3  -3 -13   54.39    6.67
   3   3 -12    5.69    3.91
   3  -3 -12    1.46    3.02
   3   3 -11    6.05    3.48
   3  -3 -11    3.73    3.00
   3   3 -10  677.40   22.67
   3  -3 -10  679.87   21.32
   3  -3  -9  155.73    8.79
   3   3  -9  164.48    9.83
  -3   3   9  147.37    4.47
   3  -3  -8 1290.24   29.90
  -3   3   8 1190.48   22.02
   3   3  -8 1254.82   31.13
  -3   3   7   17.60    1.07
   3   3  -7   21.99    4.16
   3  -3  -7   15.64    2.94
  -3   3   7   19.54    1.10
   3   3  -6 1015.28   25.86
   3  -3  -6 1059.67   24.88
  -3   3   5  171.28    4.14
   3  -3  -5  161.40    7.39
   3   3  -5  168.10    8.15
   3   3  -4  197.08    8.57
   3  -3  -4  207.25    8.04
  -3   3   4  205.23    5.21
   3  -3  -3  506.47   10.71
   3   3  -3  479.80   13.76
  -3   3   3  467.28   10.61
   3  -3  -3  474.38   13.18
   3   3  -2 2316.69   43.52
   3   3  -2 2228.72   40.96
  -3   3   2 2141.36   40.58
   3  -3  -2 2205.79   40.66
   3  -3  -2 2271.89   39.19
   3  -3  -2 2244.74   42.93
   3   3  -1  124.68    4.70
  -3  -3   1  125.13    6.09
   3   3  -1  115.33    5.65
   3  -3  -1  109.13    5.56
  -3   3   1  122.73    5.09
  -3   3   1  130.28    3.60
  -3  -3   0  670.54   16.78
   3   3   0  662.02   14.53
  -3   3   0  658.30   15.76
   3   3   0  642.95   15.90
   3   3   1 1298.26   27.42
  -3  -3  -1 1299.07   28.48
  -3   3  -1 1381.87   28.17
  -3  -3  -2   34.68    3.64
  -3   3  -2   30.66    3.71
  -3   3  -3   25.08    3.57
  -3  -3  -3   31.22    3.81
  -3   3  -4 3322.64   63.64
  -3  -3  -4 3245.28   62.88
  -3   3  -5  120.36    7.52
  -3  -3  -5  147.66    7.79
  -3  -3  -6  870.71   22.71
  -3   3  -6  811.16   23.22
  -3  -3  -7  210.76   10.12
  -3  -3  -8  707.23   21.10
  -3  -3  -9   53.17    5.61
  -3   3  -9   39.88    5.42
  -3  -3  -9   46.14    5.37
  -3  -3 -10  981.65   27.68
  -3   3 -10  970.99   29.63
  -3  -3 -10  972.23   27.86
  -3  -3 -11    9.00    3.57
  -3   3 -11    6.66    4.22
  -3  -3 -11    5.79    2.98
  -3   3 -12    3.17    3.79
  -3  -3 -12    3.07    3.12
  -3   3 -13    4.93    3.95
  -3  -3 -13    7.08    4.03
  -3  -3 -14   10.37    4.32
  -3   3 -14   20.03    5.90
  -3   3 -15   25.58    6.56
  -3  -3 -15   39.82    6.67
  -3  -3 -16  526.23   23.60
  -3   3 -16  465.46   23.94
  -3   3 -17    9.25    5.38
  -3  -3 -17   24.92    6.16
   3   4 -18    2.76    4.85
   3  -4 -18    8.10    4.74
   3   4 -17  108.50   11.39
   3  -4 -17   89.82    9.92
   3  -4 -16  337.68   17.80
   3   4 -16  361.16   19.87
   3   4 -15   -0.68    3.60
   3  -4 -15    3.06    3.45
   3  -4 -14  237.32   13.69
   3   4 -14  270.74   15.93
   3   4 -13  222.27   13.83
   3  -4 -13  243.05   13.21
   3   4 -12 1746.24   45.73
   3  -4 -12 1811.04   43.53
   3   4 -11   13.25    4.53
   3  -4 -11   12.01    3.52
   3  -4 -10  104.10    7.35
   3   4 -10  112.48    8.87
   3  -4  -9   80.54    6.31
   3   4  -9   74.51    6.87
   3  -4  -8 1240.84   29.52
   3   4  -8 1213.49   31.49
   3  -4  -7    4.41    2.21
   3   4  -7    5.06    3.00
   3  -4  -6   88.25    5.52
   3   4  -6   83.73    6.18
   3  -4  -5  491.31   14.15
   3   4  -5  501.51   15.39
   3   4  -4 1255.10   28.45
   3  -4  -4 1250.08   26.90
   3   4  -3    3.84    2.32
   3  -4  -3    3.18    1.83
   3  -4  -3    4.76    1.39
   3  -4  -3    5.26    1.10
  -3   4   3    5.29    1.19
   3  -4  -2 2415.68   44.20
   3   4  -2 2479.29   47.82
  -3   4   2 2509.43   45.05
   3   4  -2 2483.31   46.10
   3  -4  -2 2594.02   47.24
   3   4  -1  235.25    8.35
  -3   4   1  217.07    7.24
   3   4  -1  212.61    7.23
   3  -4  -1  229.55    8.22
  -3   4   1  248.05    6.30
   3   4   0 3552.37   62.64
   3   4   0 3369.48   61.42
  -3   4   0 3387.78   62.27
  -3  -4   0 3353.49   63.80
  -3  -4  -1 1079.59   24.46
   3   4   1 1077.20   23.24
  -3   4  -1 1059.28   23.91
  -3   4  -2  938.16   22.76
  -3  -4  -2  976.71   23.05
  -3  -4  -3   62.28    4.94
  -3   4  -3   58.93    4.99
  -3  -4  -4 1861.70   39.42
  -3  -4  -5  180.08    8.65
  -3  -4  -6    2.06    2.43
  -3  -4  -7   37.07    4.59
  -3  -4  -8    3.59    2.49
  -3   4  -8    7.57    3.52
  -3  -4  -9   70.70    6.28
  -3  -4  -9   77.51    6.39
  -3   4  -9   88.75    7.97
  -3   4 -10  978.20   30.09
  -3  -4 -10  977.00   27.73
  -3  -4 -10  984.76   27.58
  -3  -4 -11    7.25    3.13
  -3   4 -11    6.18    3.44
  -3  -4 -11    4.41    2.91
  -3  -4 -12  415.63   17.08
  -3   4 -12  397.59   19.21
  -3  -4 -12  406.36   17.51
  -3   4 -13   75.08    8.85
  -3  -4 -13   85.79    8.33
  -3   4 -14  768.30   29.46
  -3  -4 -14  722.79   26.54
  -3   4 -15   16.05    5.95
  -3  -4 -15   27.49    5.87
  -3  -4 -16  143.52   12.00
  -3   4 -16  124.45   12.35
  -3   4 -17   15.44    5.97
  -3  -4 -17    7.18    4.20
   3   5 -17   90.88   10.96
   3  -5 -17   89.83    9.52
   3   5 -16    2.37    5.13
   3  -5 -16   -0.51    3.32
   3   5 -15   30.78    6.75
   3  -5 -15   25.41    5.54
   3  -5 -14  156.45   10.87
   3   5 -14  177.63   13.08
   3  -5 -13  127.57    9.47
   3   5 -13  133.81   11.28
   3  -5 -12   15.92    4.00
   3   5 -12   17.29    4.83
   3  -5 -11  316.99   13.93
   3   5 -11  311.14   15.41
   3  -5 -10  116.79    7.76
   3   5 -10  114.41    8.78
   3  -5  -9  332.43   12.98
   3   5  -9  337.99   14.81
   3  -5  -8  160.61    8.23
   3   5  -8  134.85    8.90
   3  -5  -7 1750.86   37.74
   3   5  -7 1802.20   40.45
   3  -5  -6 2385.11   47.15
   3   5  -6 2346.24   49.52
   3  -5  -5  938.77   22.27
   3   5  -5  993.20   24.36
   3  -5  -4  195.18    4.76
   3  -5  -4  197.15    7.68
   3   5  -4  184.23    8.45
   3   5  -3  294.57   10.52
   3  -5  -3  293.26    9.65
   3  -5  -3  317.26    7.75
   3   5  -2 1836.79   36.51
   3  -5  -2 1758.52   35.41
   3   5  -2 1785.17   35.45
  -3   5   1 1074.81   20.65
   3   5  -1 1016.38   22.65
   3  -5  -1 1005.50   22.43
   3   5  -1  956.61   21.85
  -3  -5   0   55.71    4.54
   3   5   0   56.73    3.92
   3   5   0   56.21    4.04
  -3   5   0   51.12    3.28
  -3  -5  -1  314.58   10.93
   3   5   1  289.25    9.25
  -3  -5  -2   64.60    4.99
  -3  -5  -3  629.08   17.60
  -3  -5  -4   39.98    4.55
  -3  -5  -5  865.05   22.69
  -3  -5  -6  474.48   15.70
  -3  -5  -7  795.72   22.32
  -3  -5  -8 1187.57   30.10
  -3   5  -8 1168.51   32.17
  -3   5  -9  621.13   22.27
  -3  -5  -9  634.60   19.89
  -3  -5  -9  638.75   20.34
  -3   5 -10  180.76   11.76
  -3  -5 -10  179.45   10.14
  -3  -5 -10  158.68    9.75
  -3  -5 -11  114.17    8.36
  -3   5 -11  116.19   10.11
  -3  -5 -11  123.57    8.91
  -3  -5 -12  233.85   12.24
  -3   5 -12  201.60   13.88
  -3  -5 -12  197.80   11.88
  -3   5 -13   86.63    9.87
  -3  -5 -13   86.64    8.41
  -3  -5 -14   15.48    4.82
  -3   5 -14   22.93    5.73
  -3   5 -15  149.23   13.15
  -3  -5 -15  182.81   12.83
  -3   5 -16  319.13   20.00
   3   6 -17  270.61   18.19
   3  -6 -16    2.96    3.74
   3   6 -16   -2.02    4.74
   3  -6 -15  438.79   19.41
   3   6 -15  477.46   22.75
   3  -6 -14    1.03    2.85
   3   6 -14   -0.15    3.71
   3  -6 -13  378.91   16.39
   3   6 -13  376.03   18.75
   3  -6 -12  382.83   15.85
   3   6 -12  370.41   17.98
   3  -6 -11  516.90   17.88
   3   6 -11  460.14   19.56
   3   6 -10   19.40    4.71
   3  -6 -10   16.60    3.35
   3  -6  -9  267.52   11.32
   3   6  -9  282.66   13.48
   3  -6  -8  572.94   16.93
   3   6  -8  543.99   19.04
   3   6  -7   66.52    6.10
   3  -6  -7   64.49    4.95
   3   6  -6    1.99    2.51
   3  -6  -6    0.69    1.92
   3  -6  -5 1050.68   23.65
   3   6  -5 1031.18   25.80
   3  -6  -4  771.69   14.87
   3   6  -4  760.58   20.21
   3  -6  -4  759.35   18.28
   3   6  -3 1216.39   27.58
   3  -6  -3 1182.67   25.96
   3  -6  -3 1276.56   23.96
  -3   6   2    2.67    1.54
   3   6  -2   -1.50    2.01
   3   6  -2   -0.11    2.15
   3  -6  -2    3.05    1.84
   3   6  -1 5319.19   95.66
  -3   6   1 5634.78   94.22
   3   6  -1 5135.84   95.69
   3   6   0  211.34    8.25
  -3   6   0  234.35    7.57
   3   6   0  211.35    7.86
   3   6   1 1405.98   28.90
  -3  -6  -1 1427.11   31.58
  -3  -6  -2   51.52    4.68
  -3  -6  -3 2607.27   52.25
  -3  -6  -4    1.86    2.32
  -3  -6  -5  310.54   12.14
  -3  -6  -6  157.99    8.57
  -3  -6  -7   30.85    4.28
  -3  -6  -8   20.85    3.53
  -3   6  -8   38.15    5.76
  -3  -6  -8   29.38    4.22
  -3   6  -9  350.92   16.40
  -3  -6  -9  391.42   14.51
  -3  -6  -9  417.12   15.58
  -3  -6 -10    7.21    2.89
  -3   6 -10   13.40    4.89
  -3  -6 -10   11.66    3.28
  -3   6 -11 1156.22   35.11
  -3  -6 -11 1112.70   30.89
  -3  -6 -11 1112.11   30.65
  -3  -6 -12   20.27    4.68
  -3   6 -12    9.17    4.27
  -3  -6 -12   14.58    3.71
  -3   6 -13  273.67   16.71
  -3  -6 -13  259.17   14.03
  -3   6 -14  176.47   14.08
  -3  -6 -14  175.26   11.80
  -3   6 -15  542.99   25.82
  -3   6 -16   -2.93    5.18
   3   7 -17  374.86   21.92
   3   7 -16   18.14    6.19
   3   7 -15    7.59    4.68
   3   7 -14   20.31    5.40
   3  -7 -14   25.89    5.47
   3  -7 -13   56.45    6.47
   3   7 -13   55.33    7.88
   3   7 -12   13.76    4.60
   3  -7 -12   11.75    3.54
   3   7 -11   53.85    7.05
   3  -7 -11   59.02    5.73
   3   7 -10    9.65    3.79
   3  -7 -10   12.26    2.94
   3  -7  -9  545.20   17.07
   3   7  -9  559.52   20.14
   3  -7  -8  256.78   10.38
   3   7  -8  253.96   12.41
   3   7  -7 2492.52   54.00
   3  -7  -7 2569.84   50.23
   3  -7  -6  263.29    9.56
   3   7  -6  260.80   11.49
   3  -7  -5 1508.91   31.10
   3   7  -5 1452.94   33.82
   3  -7  -4  496.23   13.42
   3   7  -4  502.83   15.36
   3  -7  -4  497.75   10.85
   3   7  -3 1654.27   35.28
   3   7  -3 1619.99   35.33
   3  -7  -3 1707.96   33.47
   3   7  -2    6.13    2.41
   3   7  -2    1.85    1.90
  -3   7   2    2.57    1.76
   3  -7  -2    0.94    1.58
   3   7  -1  345.07   10.83
   3   7  -1  348.26   11.59
  -3   7   1  352.75   10.37
   3   7   0   57.80    3.99
  -3   7   0   71.36    4.30
   3   7   0   60.90    4.78
   3   7   1  300.36   10.75
   3   7   1  287.88    9.19
  -3  -7  -1  296.97   11.28
  -3  -7  -2    5.44    2.95
  -3  -7  -3  823.80   21.87
  -3  -7  -4  587.64   17.81
  -3  -7  -5 3785.88   73.38
  -3  -7  -6   63.08    5.52
  -3  -7  -7  133.12    8.23
  -3   7  -8   10.18    3.69
  -3  -7  -8   11.79    3.28
  -3  -7  -8    5.22    2.61
  -3  -7  -9 2137.80   47.46
  -3   7  -9 2057.44   50.70
  -3  -7  -9 2158.90   46.05
  -3   7 -10    6.59    4.42
  -3  -7 -10   11.55    3.46
  -3  -7 -10   17.06    3.84
  -3  -7 -11  162.12    9.87
  -3  -7 -11  150.93    9.56
  -3   7 -11  150.58   11.86
  -3   7 -12   12.42    5.05
  -3  -7 -12   22.85    4.49
  -3  -7 -12   10.41    3.79
  -3  -7 -13   22.76    4.62
  -3   7 -13   38.63    7.48
  -3   7 -14    3.30    3.91
  -3   7 -15   89.63   10.80
  -3   7 -16    0.49    4.13
   3   8 -17   86.03   10.90
   3   8 -16  318.58   19.62
   3   8 -15  391.71   21.09
   3   8 -14  117.06   11.17
   3  -8 -13  382.74   16.00
   3   8 -13  342.21   18.31
   3  -8 -12  332.50   14.19
   3   8 -12  320.05   16.95
   3  -8 -11  431.97   15.76
   3   8 -11  418.72   18.88
   3   8 -10   51.82    6.72
   3  -8 -10   50.90    5.00
   3  -8  -9  130.25    7.41
   3   8  -9  136.88    9.76
   3  -8  -8  564.54   16.38
   3   8  -8  546.81   19.43
   3   8  -7   37.15    5.17
   3  -8  -7   35.71    3.62
   3   8  -6    4.88    2.85
   3  -8  -6    3.25    1.73
   3  -8  -5  138.20    3.85
   3  -8  -5  147.47    6.50
   3   8  -5  143.05    8.01
   3  -8  -4  321.29   10.04
   3   8  -4  322.71   11.81
   3  -8  -4  317.51    8.28
   3   8  -3  331.17   11.54
   3   8  -3  326.78   11.87
   3  -8  -3  331.60   10.00
   3   8  -2  343.41   11.25
   3   8  -2  336.69   11.98
  -3   8   2  327.52   10.68
  -3   8   1 3671.88   66.78
   3   8  -1 3591.54   66.70
   3   8  -1 3590.85   68.53
  -3   8   0 1520.25   32.72
   3   8   0 1586.84   31.91
   3   8   0 1598.99   34.35
   3   8   1  120.05    6.82
   3   8   1  114.80    5.32
  -3   8  -1  123.98    6.30
  -3  -8  -1  116.97    7.15
  -3  -8  -2  491.96   15.91
  -3  -8  -3 2433.07   50.33
  -3  -8  -4  723.01   20.61
  -3  -8  -5    2.96    2.37
  -3  -8  -6   43.39    4.82
  -3  -8  -7   23.68    4.14
  -3   8  -7   11.58    4.02
  -3  -8  -8  215.97    9.53
  -3   8  -8  226.44   12.43
  -3  -8  -8  216.89   10.73
  -3  -8  -9   99.87    7.71
  -3   8  -9   90.57    8.73
  -3  -8  -9   94.66    6.59
  -3  -8 -10  339.19   14.50
  -3   8 -10  320.35   16.59
  -3  -8 -10  331.09   13.48
  -3  -8 -11  919.59   26.94
  -3   8 -11  863.45   30.55
  -3  -8 -11  938.76   26.36
  -3   8 -12  105.43   10.46
  -3   8 -13   27.69    6.58
  -3   8 -14  269.40   17.63
  -3   8 -15  280.56   18.54
  -3   8 -16   65.54    9.83
   3   9 -16    9.53    4.89
   3   9 -15    5.76    5.39
   3   9 -14  120.74   11.73
   3   9 -13   26.49    5.88
   3   9 -12  176.63   12.61
   3  -9 -11  218.78   10.56
   3   9 -11  214.16   13.37
   3  -9 -10  769.91   21.34
   3   9 -10  716.49   25.31
   3  -9  -9   38.91    4.08
   3   9  -9   26.70    4.94
   3  -9  -8  306.52   11.06
   3   9  -8  289.76   13.71
   3  -9  -7  442.17   13.43
   3   9  -7  461.63   16.85
   3  -9  -6 1797.93   36.41
   3   9  -6 1803.82   41.00
   3  -9  -5   92.97    3.53
   3  -9  -5   98.89    5.08
   3   9  -5  108.28    7.05
   3   9  -4   88.98    6.21
   3  -9  -4   91.03    4.78
   3   9  -3  311.63   12.25
   3   9  -3  324.45   11.56
   3   9  -2  908.42   21.73
  -3   9   2  895.02   21.76
   3   9  -2  867.89   23.16
   3   9  -1   10.39    2.24
   3   9  -1    8.60    2.94
  -3   9   1   12.42    2.71
   3   9   0   21.21    2.64
   3   9   0   22.37    3.92
  -3   9   0   21.35    3.07
   3   9   1   98.40    4.94
  -3   9  -1  100.87    6.00
   3   9   1   94.32    6.44
  -3  -9  -2 1263.17   30.66
  -3  -9  -3    0.73    2.29
  -3  -9  -4 1420.51   33.76
  -3  -9  -5  412.63   15.01
  -3  -9  -6  980.59   26.60
  -3  -9  -7   -1.93    2.74
  -3   9  -7   -0.96    3.38
  -3  -9  -7    3.73    1.93
  -3  -9  -8  744.60   19.87
  -3  -9  -8  755.19   22.67
  -3   9  -8  712.31   24.51
  -3   9  -9  446.58   19.25
  -3  -9  -9  436.71   14.77
  -3  -9  -9  412.18   16.11
  -3  -9 -10   64.23    6.34
  -3   9 -10   60.92    7.87
  -3  -9 -10   53.71    5.18
  -3   9 -11    9.78    5.00
  -3  -9 -11   14.08    3.76
  -3   9 -12   67.60    8.88
  -3   9 -13    2.06    3.94
  -3   9 -14   18.28    6.65
  -3   9 -15   41.32    8.07
   3  10 -16  333.95   20.33
   3  10 -15   17.10    6.19
   3  10 -14  215.76   15.34
   3  10 -13   16.66    5.87
   3  10 -12 1186.68   36.98
   3  10 -11   -0.98    3.62
   3  10 -10    3.15    3.51
   3  10  -9    5.12    3.34
   3 -10  -9    6.38    2.47
   3 -10  -8  298.52   10.54
   3  10  -8  272.39   13.56
   3  10  -7    3.01    2.99
   3 -10  -7    4.36    1.91
   3  10  -6   14.98    3.95
   3 -10  -6   10.63    2.04
   3 -10  -5   78.45    4.46
   3  10  -5   69.18    5.82
   3  10  -4  260.53   10.95
   3  10  -4  266.97   11.82
   3  10  -3   21.37    3.84
   3  10  -3   26.06    3.54
   3  10  -2  467.06   14.06
  -3  10   2  459.14   14.55
   3  10  -2  493.50   16.20
   3  10  -1  112.18    5.84
  -3  10   1  114.36    6.62
   3  10  -1  110.08    7.17
   3  10   0 3785.52   72.55
  -3  10   0 3732.72   70.60
   3  10   0 3675.20   67.96
   3  10   1   38.03    4.49
   3  10   1   47.59    3.42
  -3  10  -1   40.64    4.25
  -3 -10  -2 1592.44   37.16
  -3 -10  -3   42.66    5.04
  -3 -10  -4  620.93   19.52
  -3 -10  -5    1.91    2.77
  -3  10  -6    1.56    2.65
  -3 -10  -6    5.76    3.02
  -3  10  -7    9.47    3.54
  -3 -10  -7    6.78    2.92
  -3 -10  -7   10.23    2.16
  -3  10  -8  356.74   16.59
  -3 -10  -8  392.32   12.59
  -3 -10  -8  358.07   14.81
  -3 -10  -9   37.80    5.21
  -3  10  -9   28.61    6.04
  -3 -10 -10 1453.88   36.68
  -3  10 -10 1424.40   40.99
  -3  10 -11   22.87    5.99
  -3  10 -12  544.45   24.37
  -3  10 -13    3.77    4.50
  -3  10 -14  835.41   33.03
  -3  10 -15    8.89    5.55
   3  11 -16    8.62    5.45
   3  11 -15    8.00    5.05
   3  11 -14   49.05    7.99
   3  11 -13   33.59    6.76
   3  11 -12   52.71    7.62
   3  11 -11   13.38    4.62
   3  11 -10  356.20   17.14
   3  11  -9  266.00   14.12
   3  11  -8  237.73   12.73
   3  11  -7   19.92    4.40
   3 -11  -7   29.16    2.93
   3 -11  -6 1449.78   29.72
   3  11  -6 1447.74   35.60
   3  11  -5    0.06    2.23
   3  11  -4  253.70   11.90
   3  11  -4  260.23   11.01
   3  11  -3  887.77   22.61
   3  11  -3  864.81   24.66
   3  11  -2  906.19   22.18
  -3  11   2  905.51   23.45
   3  11  -2  874.36   24.63
  -3  11   1   23.65    3.73
   3  11  -1   27.12    3.18
   3  11  -1   29.59    4.36
   3  11   0  154.46    6.54
   3  11   0  153.18    8.91
  -3  11   0  140.35    7.88
  -3  11  -1    8.44    2.95
   3  11   1   11.72    2.00
   3  11   1    8.78    2.74
  -3  11  -2  150.38    8.45
  -3 -11  -2  151.89    8.98
  -3 -11  -3    6.39    3.12
  -3 -11  -4  855.49   24.51
  -3 -11  -5  397.33   15.46
  -3  11  -5  396.18   15.60
  -3 -11  -6  467.52   17.04
  -3  11  -6  455.92   17.70
  -3  11  -7   -2.38    3.56
  -3 -11  -7   -3.40    2.76
  -3  11  -8  440.16   18.67
  -3 -11  -8  400.78   16.02
  -3  11  -9  195.69   12.82
  -3 -11  -9  187.85   10.69
  -3 -11 -10  276.47   13.35
  -3  11 -10  306.32   16.82
  -3  11 -11   33.51    7.15
  -3  11 -12   21.60    5.99
  -3  11 -13    6.11    4.75
  -3  11 -14   15.65    5.88
  -3  11 -15   -8.02    6.15
   3  12 -16  139.64   13.47
   3  12 -15  240.05   17.23
   3  12 -14   69.31    9.29
   3  12 -13  195.05   14.31
   3  12 -12  172.04   13.12
   3  12 -11  303.01   16.64
   3  12 -10   57.47    7.09
   3  12  -9  406.79   17.93
   3  12  -8  310.20   14.80
   3  12  -7   85.68    7.52
   3  12  -6    3.00    3.27
   3  12  -5   20.40    4.01
   3  12  -5   15.97    4.17
   3  12  -4   58.15    5.21
   3  12  -4   47.68    5.64
   3  12  -3  822.07   21.83
   3  12  -3  836.52   24.64
   3  12  -2  432.85   13.42
   3  12  -2  382.18   15.28
  -3  12   2  394.06   14.52
   3  12  -1 2224.54   43.59
  -3  12   1 2159.51   46.42
   3  12  -1 2142.00   47.98
   3  12   0  274.95   12.48
   3  12   0  249.16    8.82
  -3  12   0  254.78   11.24
   3  12   1  192.34    7.02
   3  12   1  192.25   10.38
  -3  12  -1  196.29    9.91
  -3  12  -2  695.64   21.04
  -3 -12  -2  659.29   21.20
  -3 -12  -3  971.97   27.24
  -3 -12  -4 1259.10   32.66
  -3  12  -4 1272.18   32.09
  -3 -12  -5   24.57    4.45
  -3  12  -5   25.82    4.51
  -3 -12  -6   38.30    5.10
  -3  12  -6   37.43    5.28
  -3  12  -7   16.84    4.88
  -3 -12  -7   18.49    4.02
  -3 -12  -8   49.23    5.58
  -3  12  -8   45.76    6.57
  -3 -12  -9   46.48    5.76
  -3  12  -9   55.35    7.41
  -3  12 -10  384.65   19.30
  -3  12 -11  973.24   33.61
  -3  12 -12   94.04   10.17
  -3  12 -13  226.25   16.06
  -3  12 -14  128.51   12.99
   3  13 -15   26.75    7.42
   3  13 -14    2.77    4.47
   3  13 -13   60.78    8.51
   3  13 -12    3.20    3.87
   3  13 -11  178.96   12.90
   3  13 -10    1.94    4.05
   3  13  -9  192.22   12.08
   3  13  -8  224.49   12.58
   3  13  -7  968.09   28.40
   3  13  -6    3.69    2.72
   3  13  -6    1.36    3.02
   3  13  -5  534.86   18.10
   3  13  -5  549.80   20.12
   3  13  -4   56.45    6.36
   3  13  -4   51.70    5.28
   3  13  -3  628.53   18.29
   3  13  -3  626.71   21.21
   3  13  -2  242.58    9.77
   3  13  -2  249.76   12.39
  -3  13   2  257.28   11.74
   3  13  -1  278.60   10.05
   3  13  -1  268.76   12.87
  -3  13   1  270.41   12.01
  -3  13   0   87.04    6.71
   3  13   0   86.79    4.85
   3  13   0   82.82    7.18
   3  13   1  124.09    5.37
   3  13   1  126.86    8.85
  -3  13  -1  117.11    7.96
  -3  13  -2  290.67   13.01
  -3  13  -3  259.57   12.45
  -3  13  -3  252.22   11.33
  -3 -13  -3  257.24   12.62
  -3 -13  -4  394.35   15.95
  -3  13  -4  382.77   15.02
  -3 -13  -5 1632.23   39.59
  -3  13  -5 1595.84   39.42
  -3 -13  -6  119.34    8.69
  -3  13  -6  115.81    8.95
  -3  13  -7  807.38   26.53
  -3 -13  -7  784.44   24.89
  -3 -13  -8   18.55    3.99
  -3  13  -8   20.79    5.23
  -3  13  -9  778.04   27.91
  -3 -13  -9  804.68   25.07
  -3  13 -10   34.47    6.79
  -3  13 -11   38.32    6.82
  -3  13 -12   85.42    9.88
  -3  13 -13   56.92    8.75
  -3  13 -14   60.86    9.12
   3  14 -15   28.93    7.11
   3  14 -14   75.37    9.93
   3  14 -13  323.75   18.90
   3  14 -12  189.51   14.07
   3  14 -11  310.08   17.12
   3  14 -10  129.49   10.64
   3  14  -9   54.23    7.16
   3  14  -8  117.20    9.34
   3  14  -7  244.47   12.88
   3  14  -7  246.40   14.07
   3  14  -6   -0.48    2.65
   3  14  -6   -3.60    4.18
   3  14  -5  390.48   15.20
   3  14  -5  402.98   17.45
   3  14  -4  379.26   14.26
   3  14  -4  389.09   16.91
   3  14  -3   58.51    5.05
   3  14  -3   58.83    6.72
   3  14  -2  229.08    9.54
   3  14  -2  223.42   12.03
  -3  14   2  215.90   11.13
   3  14  -1  761.00   19.38
   3  14  -1  775.07   24.51
  -3  14   1  772.17   23.20
   3  14   0  251.70   12.92
  -3  14   0  230.79   11.45
   3  14   0  244.39    8.43
  -3  14  -1  944.49   26.85
   3  14   1  960.17   28.17
  -3  14  -2   31.99    5.07
  -3  14  -2   39.50    4.44
  -3  14  -3  924.10   25.34
  -3  14  -3  975.63   28.13
  -3 -14  -3  933.64   27.85
  -3  14  -4    5.33    3.62
  -3  14  -4    2.11    2.71
  -3 -14  -4    0.78    2.83
  -3 -14  -5  300.57   14.03
  -3  14  -5  316.64   14.27
  -3 -14  -6  159.93   10.24
  -3  14  -6  174.72   10.99
  -3  14  -7   22.39    4.67
  -3 -14  -7   16.25    4.13
  -3  14  -8   62.51    7.41
  -3 -14  -8   53.07    6.10
  -3  14  -9  286.46   16.23
  -3  14 -10   15.54    5.42
  -3  14 -11  281.84   17.25
  -3  14 -12    9.82    5.64
  -3  14 -13  284.53   18.50
  -3  14 -14   38.52    8.63
   3  15 -14  119.48   12.13
   3  15 -13  184.77   14.40
   3  15 -12    2.59    4.26
   3  15 -11  279.16   16.31
   3  15 -10  186.84   12.83
   3  15  -9   14.20    4.39
   3  15  -8  370.97   16.95
   3  15  -7  855.39   28.86
   3  15  -7  844.06   26.58
   3  15  -6  703.78   22.71
   3  15  -6  692.05   24.91
   3  15  -5  621.42   22.98
   3  15  -5  607.46   20.06
   3  15  -4  318.90   15.64
   3  15  -4  337.19   13.36
   3  15  -3  210.32    9.78
   3  15  -3  219.70   12.55
   3  15  -2  442.26   14.16
   3  15  -2  420.62   17.70
  -3  15   2  443.12   17.06
  -3  15   1  416.90   16.43
   3  15  -1  401.28   17.12
  -3  15   0   49.05    5.71
   3  15   0   51.28    6.30
  -3  15   0   52.37    4.33
  -3  15  -1   47.35    5.54
  -3  15  -1   54.24    4.65
   3  15   1   70.15    7.39
  -3  15  -2    0.59    2.07
  -3  15  -2    0.91    2.99
  -3 -15  -3  278.24   14.00
  -3  15  -3  288.42   12.54
  -3  15  -3  305.72   14.60
  -3 -15  -4  605.86   21.58
  -3  15  -4  607.40   21.86
  -3  15  -4  586.88   19.93
  -3 -15  -5  550.07   20.51
  -3  15  -5  611.37   21.11
  -3  15  -6  730.41   24.78
  -3 -15  -6  736.78   24.37
  -3 -15  -7  477.48   18.84
  -3  15  -7  428.69   18.96
  -3  15  -8  395.71   18.61
  -3 -15  -8  387.93   16.85
  -3  15  -9  292.05   16.51
  -3  15 -10  257.14   15.95
  -3  15 -11    2.79    3.86
  -3  15 -12    3.54    3.92
  -3  15 -13   65.82    9.40
   3  16 -14  139.04   13.28
   3  16 -13   20.79    5.79
   3  16 -12  292.03   17.57
   3  16 -11    1.30    4.14
   3  16 -10  422.47   20.04
   3  16  -9    5.39    4.04
   3  16  -8  173.46   11.59
   3  16  -8  185.22   13.21
   3  16  -7   81.72    7.76
   3  16  -7   88.29    9.10
   3  16  -6  138.15   10.80
   3  16  -6  132.79    9.23
   3  16  -5  239.21   14.00
   3  16  -5  218.66   11.23
   3  16  -4   89.65    8.34
   3  16  -4   84.71    6.61
   3  16  -3    1.71    2.16
   3  16  -3   10.20    3.94
   3  16  -2 1082.42   32.51
  -3  16   2 1128.30   31.49
   3  16  -1  310.87   15.59
  -3  16   1  288.80   14.11
   3  16   0  572.79   22.03
  -3  16   0  634.80   21.68
   3  16   1   19.48    4.78
  -3  16  -1   22.11    4.68
  -3  16  -2  213.73   12.11
  -3  16  -2  209.75   10.06
  -3  16  -3    3.13    3.57
  -3 -16  -3    2.42    3.13
  -3  16  -3    5.04    2.60
  -3 -16  -4  510.08   20.30
  -3  16  -4  553.81   21.27
  -3  16  -4  548.08   19.26
  -3 -16  -5    2.68    2.84
  -3  16  -5    1.53    2.89
  -3  16  -5    2.35    3.43
  -3  16  -6   11.00    3.70
  -3 -16  -6   17.11    4.33
  -3 -16  -7   15.02    4.06
  -3  16  -7   22.12    5.16
  -3  16  -8   17.84    5.21
  -3  16  -9    9.54    5.07
  -3  16 -10  317.01   18.11
  -3  16 -11    0.95    4.58
  -3  16 -12  202.49   15.53
  -3  16 -13   45.60    8.57
   3  17 -14   15.79    5.57
   3  17 -13   38.57    7.96
   3  17 -12    9.39    5.28
   3  17 -11    2.09    3.87
   3  17 -10  116.24   11.46
   3  17 -10  116.96   10.74
   3  17  -9  129.36   11.76
   3  17  -9  156.99   11.59
   3  17  -8  571.46   24.31
   3  17  -8  540.38   21.48
   3  17  -7   33.94    6.76
   3  17  -7   25.22    4.90
   3  17  -6  564.42   20.25
   3  17  -6  572.97   23.49
   3  17  -5  145.96    9.22
   3  17  -5  126.41   10.76
   3  17  -4  484.52   20.65
   3  17  -3   40.03    6.73
   3  17  -2  367.86   17.57
  -3  17   2  358.91   16.42
  -3  17   1  148.93   10.30
   3  17  -1  153.29   11.34
  -3  17   0  165.06   10.87
   3  17   0  164.42   11.52
  -3  17  -1   27.24    5.26
   3  17   1   37.96    6.40
  -3  17  -2    6.77    3.27
  -3 -17  -3   39.13    6.09
  -3  17  -3   24.63    5.26
  -3  17  -4 1114.98   30.64
  -3  17  -4 1120.56   33.67
  -3 -17  -4 1117.40   33.01
  -3  17  -5    1.11    3.73
  -3 -17  -5    2.20    3.08
  -3  17  -5    5.59    3.54
  -3 -17  -6  356.63   16.66
  -3  17  -6  374.20   18.34
  -3  17  -6  372.62   16.91
  -3 -17  -7   60.51    7.02
  -3  17  -7   48.31    6.66
  -3  17  -8  311.67   16.80
  -3  17  -9    5.66    4.70
  -3  17 -10  505.42   23.37
  -3  17 -11   53.23    8.22
  -3  17 -12   11.66    5.71
  -3  17 -13   -2.89    5.76
   3  18 -13  299.29   18.80
   3  18 -12  262.31   17.22
   3  18 -11  214.34   16.03
   3  18 -11  210.15   14.66
   3  18 -10  118.20   11.70
   3  18 -10   83.98    9.07
   3  18  -9   78.38    9.51
   3  18  -9   79.37    8.57
   3  18  -8   72.05    7.87
   3  18  -8  102.66   10.42
   3  18  -7  283.15   16.83
   3  18  -6   40.00    7.26
   3  18  -5   28.79    6.06
   3  18  -4   90.45    9.42
   3  18  -3   41.27    6.32
   3  18  -2  423.93   19.61
  -3  18   2  421.62   18.45
   3  18  -1   74.03    8.33
  -3  18   1   65.76    7.34
  -3  18   0  334.21   16.27
   3  18   0  337.85   17.24
   3  18   1  414.14   19.34
  -3  18  -1  392.30   17.86
  -3  18  -2  139.72   10.56
  -3 -18  -3   53.58    7.06
  -3  18  -3   54.79    7.05
  -3 -18  -4  247.11   14.06
  -3  18  -4  236.95   14.35
  -3  18  -5   92.48    9.22
  -3 -18  -5   79.60    8.04
  -3  18  -6   38.62    6.75
  -3 -18  -6   34.55    5.24
  -3  18  -6   37.62    5.80
  -3  18  -7    8.73    3.87
  -3  18  -7    7.78    4.30
  -3  18  -8    4.38    4.25
  -3  18  -9   49.35    7.69
  -3  18 -10  261.11   16.51
  -3  18 -11    4.70    4.64
  -3  18 -12   47.60    8.08
   3  19 -13   26.44    7.23
   3  19 -12   19.09    5.90
   3  19 -11  158.10   14.18
   3  19 -11  160.68   12.98
   3  19 -10   44.71    7.56
   3  19  -9   51.93    8.04
   3  19  -8    3.14    4.89
   3  19  -7  433.91   21.68
   3  19  -6  153.43   12.62
   3  19  -5  256.64   15.80
   3  19  -4   -1.96    4.08
   3  19  -3   83.64    9.34
   3  19  -2   43.46    7.01
  -3  19   2   45.21    6.59
   3  19  -1  164.32   12.42
  -3  19   1  184.02   12.41
  -3  19   0   -4.18    4.15
   3  19   0   -0.18    4.13
   3  19   1   31.13    6.31
  -3  19  -1   22.98    5.18
  -3  19  -2    5.80    4.21
  -3 -19  -3   61.45    7.61
  -3  19  -3   74.44    8.35
  -3 -19  -4   70.24    7.76
  -3  19  -4   58.96    7.89
  -3 -19  -5  207.99   13.24
  -3  19  -5  206.92   14.04
  -3  19  -6   32.32    6.59
  -3  19  -7  414.06   20.83
  -3  19  -8   48.06    7.97
  -3  19  -9  153.52   13.25
  -3  19  -9  148.56   12.20
  -3  19 -10   -2.35    4.28
  -3  19 -11    8.92    5.59
  -3  19 -12    1.92    5.01
   3  20 -10   96.73   11.08
   3  20  -9   84.09   10.11
   3  20  -8    3.73    4.51
   3  20  -7  127.14   12.06
   3  20  -6    7.21    4.92
   3  20  -5  109.21   10.90
   3  20  -4   11.07    4.79
   3  20  -3   44.91    7.49
   3  20  -2    5.86    4.61
  -3  20   1  443.48   19.85
   3  20  -1  419.34   20.76
   3  20   0    0.96    3.81
  -3  20   0   10.23    4.88
  -3  20  -1  229.58   14.42
  -3  20  -2   43.30    6.69
  -3 -20  -2   35.47    6.52
  -3  20  -3  317.01   17.41
  -3 -20  -3  302.31   16.83
  -3 -20  -4   56.01    7.31
  -3  20  -4   66.85    8.55
  -3 -20  -5   31.74    5.80
  -3  20  -5   22.98    5.90
  -3  20  -6   -1.42    4.26
  -3  20  -7   45.11    7.75
  -3  20  -8    5.54    5.14
  -3  20  -9  191.45   15.16
   3  21  -9   83.20   10.67
   3  21  -8  272.37   18.09
   3  21  -7  360.12   20.77
   3  21  -6   56.15    8.51
   3  21  -5   96.15   10.77
   3  21  -4  166.32   13.56
   3  21  -3  258.54   16.52
   3  21  -2    3.58    4.21
  -3  21   1   25.26    5.71
   3  21  -1   32.64    7.23
   3  21   0    1.79    3.68
  -3  21   0    6.32    4.11
  -3  21  -1   45.02    7.06
  -3  21  -2   -0.63    4.10
  -3 -21  -2    5.91    4.55
  -3 -21  -3    4.86    4.63
  -3  21  -3   11.37    5.00
  -3 -21  -4  125.72   10.99
  -3  21  -4  168.45   13.00
  -3  21  -5  274.87   16.88
  -3  21  -6   73.03    9.43
  -3  21  -7   23.54    6.46
  -3  21  -8   24.81    6.93
   3  22  -7    1.54    4.69
   3  22  -6    3.79    4.36
   3  22  -5   27.21    7.22
   3  22  -4  126.63   12.23
   3  22  -3  -11.11    6.34
   3  22  -2  308.87   18.74
  -3  22   1  185.00   13.61
   3  22  -1  212.00   15.32
  -3  22   0  253.18   16.09
   3  22   0  269.43   17.31
  -3  22  -1    2.99    4.07
  -3  22  -2  182.82   13.66
  -3 -22  -2  169.62   13.45
  -3  22  -3  169.64   13.27
  -3 -22  -3  175.48   13.41
  -3  22  -4   75.30    9.36
  -3  22  -5   23.77    6.27
  -3  22  -6    7.90    5.24
  -3  22  -7   -2.71    3.97
   3  23  -5   19.13    6.34
   3  23  -4  151.25   13.49
   3  23  -3   10.22    4.82
   3  23  -2  130.67   12.47
   3  23  -1    1.44    4.22
  -3  23   1   -1.31    4.15
  -3  23   0   19.28    5.91
  -3  23  -1   16.94    5.76
  -3  23  -2  150.89   12.98
  -3 -23  -2  150.39   12.77
  -3 -23  -3   48.24    7.66
  -3  23  -3   36.84    7.02
  -3  23  -4  213.64   15.46
  -3  23  -5    9.39    5.01
  -3  24   0  536.00   25.11
  -3  24  -1   87.84   10.34
  -3 -24  -1  111.43   11.44
  -3 -24  -2  114.95   11.49
  -3  24  -2  114.80   11.68
  -3  24  -3   10.80    5.30
  -3 -25  -1    0.03    4.72
   4   0 -18   79.68   10.21
   4   0 -17    6.76    5.64
   4   0 -16  737.76   29.07
   4   0 -15    1.23    3.96
   4   0 -14   58.31    7.47
   4   0 -13    1.99    3.35
   4   0 -12  777.25   26.22
   4   0 -11    4.08    3.71
   4   0 -10  567.03   20.15
   4   0  -9    1.28    2.66
   4   0  -8  518.81   17.90
   4   0  -7    1.12    2.69
   4   0  -6   38.97    4.62
  -4   0   5    1.28    1.66
   4   0  -5   -0.21    2.48
  -4   0   4   31.41    2.92
   4   0  -4   28.16    3.90
  -4   0   3    4.90    1.98
   4   0  -3    0.74    2.44
  -4   0   2 4285.96   76.39
   4   0  -2 4136.55   77.89
   4   0  -1    0.77    2.27
  -4   0   1    4.33    2.62
  -4   0   0 1635.84   32.97
   4   0   0 1591.51   33.33
  -4   0   0 1509.79   27.31
  -4   0  -1   -1.29    2.35
   4   0   1    1.03    2.56
  -4   0  -2 1905.56   39.95
  -4   0  -3   -1.23    2.78
  -4   0  -4  578.17   17.83
  -4   0  -5    0.17    2.86
  -4   0  -6  249.56   11.56
  -4   0  -7   -0.98    2.84
  -4   0  -8   87.15    7.28
  -4   0  -9    0.91    3.14
  -4   0 -10  942.03   29.29
  -4   0 -10  987.39   29.28
  -4   0 -11   -1.05    3.75
  -4   0 -12   27.02    5.96
  -4   0 -13    5.25    4.35
  -4   0 -14  621.46   25.87
  -4   0 -15    1.66    4.23
  -4   0 -16  323.50   19.49
  -4   0 -17    0.65    3.93
   4  -1 -18  544.67   25.95
   4   1 -18  574.94   26.86
   4   1 -17   34.91    7.15
   4  -1 -17   24.45    6.61
   4  -1 -16  177.39   13.34
   4   1 -16  185.08   14.07
   4   1 -15   91.06    9.51
   4  -1 -15   86.87    9.23
   4  -1 -14  134.12   10.86
   4   1 -14  128.62   10.93
   4   1 -13   44.18    6.45
   4  -1 -13   36.27    5.92
   4   1 -12   31.26    5.70
   4  -1 -12   31.57    5.66
   4  -1 -11  128.25    9.35
   4   1 -11  124.07    9.56
   4  -1 -10  441.03   17.23
   4   1 -10  419.27   17.11
   4   1  -9    8.23    3.32
   4  -1  -9   12.74    3.72
   4   1  -8 1005.30   27.25
   4  -1  -8  988.04   26.77
   4   1  -7  573.56   18.63
   4  -1  -7  617.36   18.75
   4   1  -6 1436.18   34.23
   4  -1  -6 1557.12   34.37
  -4   1   6 1476.77   29.36
  -4   1   5   50.28    3.25
   4   1  -5   50.97    4.98
   4  -1  -5   62.40    5.23
   4   1  -4 2196.45   43.73
   4  -1  -4 2115.12   43.14
  -4   1   4 2056.80   39.54
  -4  -1   4 2062.11   41.01
  -4  -1   3  673.45   16.82
   4   1  -3  680.55   18.29
  -4   1   3  671.91   16.08
   4  -1  -3  655.10   18.11
  -4  -1   2 1207.63   26.28
   4  -1  -2 1195.70   27.30
   4   1  -2 1222.72   27.39
   4   1  -2 1205.99   21.95
  -4   1   2 1188.70   25.62
  -4  -1   1  843.43   20.13
  -4   1   1  809.84   19.41
   4  -1  -1  843.55   20.73
   4   1  -1  803.21   20.37
  -4  -1   0  189.40    8.33
   4   1   0  206.92    8.49
   4  -1   0  186.58    8.28
  -4   1   0  187.33    7.88
  -4  -1   0  185.99    5.17
  -4  -1  -1  548.59   15.88
   4   1   1  574.17   15.87
  -4   1  -1  542.23   15.51
  -4   1  -2   71.74    5.36
  -4  -1  -2   74.28    5.56
  -4   1  -3  525.60   16.16
  -4  -1  -3  518.02   16.01
  -4   1  -4 4214.97   80.31
  -4  -1  -4 4205.11   80.08
  -4  -1  -5  285.55   12.03
  -4   1  -5  294.78   12.31
  -4   1  -6   53.64    5.75
  -4  -1  -6   54.51    5.68
  -4   1  -7   65.43    6.16
  -4  -1  -7   82.15    6.89
  -4   1  -8  702.08   22.81
  -4  -1  -8  715.91   22.66
  -4  -1  -9   -0.07    2.90
  -4   1  -9    0.95    3.30
  -4   1 -10  392.63   17.62
  -4  -1 -10  411.03   17.21
  -4  -1 -10  425.54   17.70
  -4  -1 -11   20.17    4.99
  -4  -1 -11    9.98    3.68
  -4   1 -11   16.63    4.64
  -4   1 -12    5.89    3.49
  -4  -1 -12   16.44    4.79
  -4  -1 -13   37.32    6.83
  -4   1 -13   49.50    8.13
  -4  -1 -14   50.50    7.52
  -4   1 -14   29.71    6.46
  -4   1 -15  162.73   13.48
  -4  -1 -15  168.44   13.29
  -4  -1 -16  266.99   17.36
  -4   1 -16  266.24   17.76
  -4   1 -17   26.09    7.11
  -4  -1 -17   11.95    5.41
   4   2 -18   15.59    6.10
   4  -2 -18    5.84    5.01
   4  -2 -17  168.22   13.50
   4   2 -17  191.86   14.91
   4  -2 -16   96.33    9.92
   4   2 -16   99.87   10.68
   4   2 -15    7.03    4.60
   4  -2 -15   26.76    6.02
   4   2 -14   78.53    8.92
   4  -2 -14   80.50    8.58
   4  -2 -13 1172.49   34.30
   4   2 -13 1128.80   34.88
   4  -2 -12  582.14   21.58
   4   2 -12  571.15   22.22
   4  -2 -11  271.43   13.61
   4   2 -11  266.39   14.00
   4  -2 -10  396.01   15.97
   4   2 -10  378.20   16.35
   4  -2  -9  447.53   16.56
   4   2  -9  457.14   17.38
   4   2  -8  803.24   24.08
   4  -2  -8  853.33   23.89
  -4   2   8  846.60   17.57
  -4   2   7  442.88   10.48
   4  -2  -7  424.51   15.00
   4   2  -7  408.50   15.41
   4   2  -6    4.44    2.86
   4  -2  -6    3.95    2.50
  -4   2   6    1.42    1.11
  -4   2   5 1649.25   30.88
   4   2  -5 1568.07   35.91
   4  -2  -5 1552.18   35.16
   4   2  -4    2.50    2.70
   4  -2  -4    6.96    2.60
  -4   2   4    5.79    1.75
  -4   2   3   17.48    2.30
  -4  -2   3   17.17    2.85
   4   2  -3   20.22    3.28
   4  -2  -3   18.20    3.27
  -4  -2   2 1021.57   24.03
   4   2  -2 1063.01   20.46
  -4   2   2 1035.02   22.67
   4   2  -2 1027.20   24.72
   4  -2  -2 1105.44   24.80
   4   2  -1 3615.65   66.70
   4  -2  -1 3616.84   66.74
   4   2  -1 3538.48   61.55
  -4   2   1 3465.28   64.97
  -4  -2   1 3484.15   66.19
  -4   2   0  374.50   11.73
  -4  -2   0  375.73   12.25
  -4  -2   0  387.57    9.20
   4   2   0  364.81   12.06
   4  -2   0  350.11   11.99
  -4   2  -1 1518.73   32.62
   4   2   1 1635.30   33.00
  -4  -2  -1 1389.99   32.64
  -4  -2  -2   10.29    3.35
  -4   2  -2   -0.57    2.72
  -4  -2  -3  605.70   17.86
  -4   2  -3  611.60   17.91
  -4   2  -4  241.24   10.69
  -4  -2  -4  246.40   10.72
  -4  -2  -5  452.75   15.65
  -4   2  -5  437.27   15.70
  -4   2  -6   74.17    6.43
  -4  -2  -6   65.27    5.94
  -4  -2  -7   66.56    6.29
  -4   2  -7   73.56    6.84
  -4   2  -8    3.60    3.35
  -4  -2  -8    0.76    2.54
  -4  -2  -9  284.93   13.72
  -4  -2 -10  397.90   17.10
  -4  -2 -10  368.18   16.35
  -4   2 -10  410.03   17.96
  -4   2 -11  213.74   13.25
  -4  -2 -11  197.25   12.18
  -4  -2 -11  211.79   12.40
  -4   2 -12   79.06    8.81
  -4  -2 -12   78.09    8.30
  -4  -2 -12   91.69    8.59
  -4   2 -13  679.79   26.81
  -4  -2 -13  618.75   24.80
  -4   2 -14  253.57   16.35
  -4  -2 -14  279.38   16.42
  -4   2 -15  129.28   12.11
  -4  -2 -15  142.96   12.29
  -4   2 -16   22.00    6.55
  -4  -2 -16   12.15    5.17
  -4  -2 -17    7.17    4.57
   4   3 -18   41.97    8.24
   4  -3 -18   48.02    8.10
   4  -3 -17  303.93   18.01
   4   3 -17  326.99   19.61
   4   3 -16    6.19    5.09
   4  -3 -16    8.30    4.94
   4  -3 -15  167.86   12.38
   4   3 -15  174.75   13.49
   4  -3 -14   89.99    8.71
   4   3 -14   91.10    9.44
   4  -3 -13   33.99    5.80
   4   3 -13   24.00    5.69
   4   3 -12   70.26    8.11
   4  -3 -12   73.43    7.38
   4  -3 -11 1273.87   33.74
   4   3 -11 1209.12   34.85
   4   3 -10   15.39    4.60
   4  -3 -10    6.78    3.04
   4  -3  -9  625.87   19.95
  -4   3   9  584.95   11.78
   4   3  -9  622.60   20.98
  -4   3   8   29.30    1.67
   4  -3  -8   31.81    4.21
   4   3  -8   33.04    5.10
   4   3  -7 4698.31   91.90
   4  -3  -7 4848.33   90.60
  -4   3   7 4835.77   82.25
   4  -3  -6  484.22   15.29
  -4   3   6  458.54   10.26
   4   3  -6  474.45   16.20
   4   3  -5 1267.70   30.23
   4  -3  -5 1222.53   28.98
  -4   3   5 1259.53   24.02
   4   3  -4    1.44    2.33
   4  -3  -4    0.99    2.23
  -4   3   4    1.60    1.23
   4   3  -3 2110.57   43.18
   4  -3  -3 2140.81   37.02
   4  -3  -3 2020.34   42.20
  -4   3   3 2027.50   39.14
  -4   3   2  762.74   17.97
   4  -3  -2  763.24   19.81
   4   3  -2  806.55   20.45
   4   3  -2  808.74   16.87
  -4  -3   2  792.83   20.00
  -4  -3   1   51.46    4.55
  -4   3   1   45.27    3.71
   4   3  -1   48.87    4.43
  -4   3   1   39.55    1.67
   4  -3  -1   50.72    4.41
   4   3  -1   45.53    2.90
  -4  -3   0    3.37    2.34
  -4   3   0    3.33    2.22
   4   3   0    5.40    2.16
   4  -3   0    6.60    2.50
  -4  -3  -1 1422.80   31.62
  -4   3  -1 1422.10   31.06
   4   3   1 1401.14   30.68
  -4  -3  -2  164.19    8.32
  -4   3  -2  165.59    8.06
  -4  -3  -3  707.33   19.81
  -4   3  -3  703.39   19.74
  -4  -3  -4   44.40    4.93
  -4   3  -4   57.19    5.53
  -4   3  -5 1621.20   38.13
  -4  -3  -5 1676.18   37.88
  -4  -3  -6  143.58    8.60
  -4   3  -6  135.23    8.76
  -4  -3  -7 1250.34   32.22
  -4   3  -7 1252.27   32.80
  -4  -3  -8    2.39    2.88
  -4  -3  -9 1188.49   32.41
  -4  -3 -10    3.39    3.28
  -4   3 -10    4.64    3.57
  -4  -3 -10   10.49    4.09
  -4  -3 -11   60.60    6.82
  -4   3 -11   61.76    7.57
  -4  -3 -11   65.00    7.08
  -4  -3 -12   87.49    8.23
  -4   3 -12   95.00    9.57
  -4  -3 -12   86.79    8.57
  -4   3 -13   25.95    5.77
  -4  -3 -13   21.37    5.02
  -4   3 -14   -0.70    3.82
  -4  -3 -14    3.83    4.44
  -4   3 -15  426.89   22.30
  -4  -3 -15  413.50   20.81
  -4   3 -16   21.32    6.22
  -4  -3 -16   22.80    6.17
  -4  -3 -17   44.05    7.90
   4  -4 -18   84.07   10.21
   4  -4 -17  224.45   15.25
   4   4 -17  224.07   16.57
   4  -4 -16   80.34    8.93
   4   4 -16   89.95   10.46
   4  -4 -15  256.00   15.12
   4   4 -15  261.41   16.56
   4   4 -14   16.84    5.18
   4  -4 -14   16.91    4.52
   4  -4 -13 1095.09   32.66
   4   4 -13 1136.27   35.32
   4  -4 -12   76.70    7.35
   4   4 -12   63.25    7.35
   4  -4 -11  710.02   23.06
   4   4 -11  690.39   24.47
   4  -4 -10  139.47    9.05
   4   4 -10  151.00   10.31
   4  -4  -9 1004.92   27.10
   4   4  -9  969.77   28.59
   4  -4  -8   15.36    3.31
   4   4  -8   18.31    4.25
   4   4  -7  384.76   15.09
   4  -4  -7  408.88   14.24
   4   4  -6   24.01    3.84
   4  -4  -6   20.07    3.35
  -4   4   6   22.79    1.29
   4   4  -5  543.89   16.84
   4  -4  -5  530.32   15.86
  -4   4   5  502.95   11.01
   4  -4  -4   11.05    1.42
   4   4  -4   12.24    3.29
  -4   4   4   11.89    1.64
   4  -4  -4   17.64    3.06
  -4   4   3 2751.30   49.47
   4  -4  -3 2547.64   52.32
   4   4  -3 2665.39   53.60
   4   4  -3 2670.35   50.26
   4  -4  -3 2775.72   47.93
   4   4  -2  511.36   15.06
  -4   4   2  505.52   13.13
   4   4  -2  507.71   12.76
   4  -4  -2  503.58   14.76
  -4  -4   2  515.37   15.22
   4   4  -1 6163.70  107.90
  -4   4   1 5867.14  101.83
   4   4  -1 6039.25  104.67
  -4   4   1 6059.05  106.21
   4  -4  -1 6039.54  107.87
  -4  -4   1 6319.93  108.79
  -4  -4   0    8.74    3.15
  -4   4   0   10.62    2.52
   4   4   0    5.20    2.53
  -4  -4  -1 1908.07   40.24
   4   4   1 1898.87   38.91
  -4   4  -1 1873.93   39.28
  -4   4  -2  526.64   16.14
  -4  -4  -2  557.79   16.86
  -4   4  -3 5793.52  105.62
  -4  -4  -3 5703.79  105.80
  -4  -4  -4  265.98   11.53
  -4   4  -4  283.25   11.86
  -4  -4  -5   62.91    5.90
  -4   4  -5   42.38    5.34
  -4   4  -6    1.78    2.99
  -4  -4  -6   -0.63    2.87
  -4  -4  -7   40.57    5.22
  -4  -4  -8   46.47    5.65
  -4  -4  -9  691.47   22.73
  -4  -4 -10  546.54   19.79
  -4   4 -10  545.38   21.67
  -4  -4 -10  526.84   19.83
  -4  -4 -11  888.80   27.66
  -4  -4 -11  845.52   27.27
  -4   4 -11  908.17   30.09
  -4  -4 -12  151.46   10.80
  -4  -4 -12  146.15   10.64
  -4   4 -12  150.37   11.94
  -4  -4 -13  230.97   13.70
  -4   4 -13  214.66   14.94
  -4  -4 -13  238.61   14.21
  -4  -4 -14   41.76    6.59
  -4   4 -14   45.70    7.88
  -4   4 -15  369.03   20.87
  -4  -4 -15  352.43   18.77
  -4   4 -16   84.19   10.77
  -4  -4 -16   73.02    9.06
   4  -5 -17  398.65   20.55
   4   5 -17  457.50   23.91
   4   5 -16  104.07   11.36
   4  -5 -16   89.55    9.37
   4  -5 -15    8.19    4.30
   4   5 -15    4.18    4.43
   4   5 -14    9.92    4.22
   4  -5 -14   10.07    4.01
   4  -5 -13   91.54    8.35
   4   5 -13   99.80    9.71
   4  -5 -12   49.22    6.15
   4   5 -12   29.73    5.75
   4  -5 -11  124.09    8.84
   4   5 -11  122.13    9.86
   4  -5 -10  505.54   17.92
   4   5 -10  496.51   19.50
   4  -5  -9  537.06   18.07
   4   5  -9  572.52   20.27
   4  -5  -8  489.82   16.29
   4   5  -8  459.04   17.41
   4  -5  -7 1085.43   27.15
   4   5  -7 1101.35   29.07
   4   5  -6  739.40   21.83
   4  -5  -6  762.05   20.44
   4   5  -5  532.03   17.12
   4  -5  -5  536.59   15.91
   4  -5  -4  788.66   16.05
   4   5  -4  761.05   20.85
   4  -5  -4  751.22   19.82
  -4   5   4  748.56   15.99
   4   5  -3 1981.48   40.15
   4   5  -3 1669.54   36.94
   4  -5  -3 1932.52   38.99
  -4   5   3 1927.68   35.60
   4   5  -2  340.31   11.92
  -4   5   2  331.00    9.98
   4  -5  -2  342.31   11.57
   4   5  -2  340.31   10.27
  -4   5   1    6.25    2.14
  -4  -5   1    6.31    2.90
   4   5  -1    5.27    1.95
  -4   5   1    8.12    1.35
   4   5  -1    8.44    2.65
   4  -5  -1    5.40    2.51
  -4  -5   0  274.46   11.00
  -4   5   0  300.20    7.99
   4   5   0  276.62    9.11
   4   5   0  256.82    9.79
  -4   5   0  257.64    9.79
  -4  -5  -1  132.07    7.54
  -4   5  -1  129.52    6.94
   4   5   1  133.36    6.78
  -4  -5  -2  195.35    9.44
  -4   5  -2  202.32    9.27
  -4  -5  -3  203.00    9.87
  -4   5  -3  203.78    9.80
  -4  -5  -4 1239.61   30.60
  -4  -5  -5 1322.20   32.38
  -4  -5  -6  383.83   14.86
  -4  -5  -7   65.29    6.27
  -4  -5  -8  723.79   22.85
  -4  -5  -9  864.23   26.27
  -4   5 -10  198.41   12.80
  -4  -5 -10  204.17   11.42
  -4  -5 -10  207.09   11.67
  -4  -5 -11   21.00    4.69
  -4   5 -11    5.76    4.21
  -4  -5 -11    8.06    3.83
  -4   5 -12   27.11    6.23
  -4  -5 -12   30.53    5.09
  -4  -5 -12   34.51    5.70
  -4  -5 -13   93.49    8.82
  -4   5 -13  101.61   10.93
  -4  -5 -13   89.46    8.72
  -4   5 -14   45.17    8.37
  -4  -5 -14   44.47    6.81
  -4   5 -15   41.99    7.95
  -4  -5 -15   32.29    6.46
  -4   5 -16  231.36   17.09
   4   6 -17    4.90    4.85
   4  -6 -16  348.02   18.07
   4   6 -16  379.52   21.03
   4   6 -15   22.54    6.00
   4  -6 -15   31.96    6.05
   4  -6 -14  425.14   18.91
   4   6 -14  491.17   22.34
   4   6 -13   30.89    6.53
   4  -6 -13   26.63    5.08
   4  -6 -12 1108.08   31.49
   4   6 -12 1140.16   34.86
   4  -6 -11  392.54   15.83
   4   6 -11  383.46   17.91
   4  -6 -10  160.56    9.31
   4   6 -10  156.36   10.85
   4   6  -9   74.96    7.47
   4  -6  -9   68.82    5.97
   4  -6  -8  364.42   13.66
   4   6  -8  375.61   15.64
   4   6  -7   49.85    5.61
   4  -6  -7   51.47    4.83
   4  -6  -6  392.10   13.45
   4   6  -6  408.73   15.13
   4  -6  -5   18.51    3.13
   4   6  -5   15.19    3.52
   4  -6  -4  444.48   10.54
   4  -6  -4  443.19   13.74
   4   6  -4  441.23   14.89
   4  -6  -3  449.93   13.92
   4   6  -3  443.88   14.67
   4   6  -3  508.58   14.03
   4   6  -2 2195.71   44.18
   4  -6  -2 2109.85   43.29
   4   6  -2 2123.53   42.38
   4   6  -1   39.15    3.51
   4   6  -1   35.13    3.87
  -4   6   1   32.92    2.55
  -4  -6   1   30.67    4.05
  -4   6   0 2883.27   51.96
   4   6   0 2726.50   54.63
   4   6   0 2900.91   54.31
  -4  -6   0 2836.27   57.33
  -4  -6  -1    3.75    3.05
   4   6   1    4.54    1.99
  -4  -6  -2 2489.37   51.46
  -4  -6  -3  852.78   23.34
  -4  -6  -4 1320.02   32.40
  -4  -6  -5  246.55   11.54
  -4  -6  -6   -0.86    2.87
  -4  -6  -7   15.14    3.67
  -4  -6  -8  197.33   10.94
  -4   6  -9   46.39    6.85
  -4  -6  -9   44.21    5.63
  -4  -6 -10  943.42   27.99
  -4  -6 -10  913.34   26.72
  -4   6 -10  864.85   29.50
  -4  -6 -11  111.61    8.64
  -4   6 -11  104.25   10.20
  -4  -6 -11  111.62    8.97
  -4  -6 -12  222.36   12.84
  -4   6 -12  195.49   14.14
  -4  -6 -12  219.86   12.66
  -4   6 -13   60.92    8.73
  -4  -6 -13   55.90    6.93
  -4  -6 -13   53.35    6.86
  -4  -6 -14  784.01   27.84
  -4   6 -14  772.52   31.17
  -4   6 -15   18.02    6.40
  -4   6 -16  155.72   14.16
   4   7 -17   10.18    6.01
   4   7 -16   14.93    6.36
   4   7 -15   31.52    6.72
   4  -7 -14  478.47   19.75
   4   7 -14  470.20   22.44
   4   7 -13   -1.31    4.43
   4  -7 -13    2.29    2.97
   4  -7 -12  231.17   12.28
   4   7 -12  230.48   14.28
   4  -7 -11    6.53    2.70
   4   7 -11    4.19    3.99
   4  -7 -10  214.93   10.85
   4   7 -10  215.29   12.77
   4   7  -9   30.98    5.47
   4  -7  -9   46.20    4.89
   4  -7  -8  741.43   20.97
   4   7  -8  729.66   23.55
   4   7  -7   78.49    7.04
   4  -7  -7   69.89    5.44
   4   7  -6 2704.64   57.85
   4  -7  -6 2832.12   55.22
   4  -7  -5   62.20    2.51
   4  -7  -5   55.58    4.61
   4   7  -5   60.27    5.55
   4   7  -4   16.78    3.57
   4  -7  -4   10.65    2.44
   4   7  -3   19.67    2.96
   4   7  -3   23.71    3.59
   4  -7  -3   20.35    3.12
   4   7  -2 1323.83   30.23
  -4   7   2 1337.14   27.41
   4   7  -2 1379.01   29.77
   4  -7  -2 1316.79   29.52
   4   7  -1   46.14    4.25
  -4   7   1   42.42    3.18
   4   7  -1   56.33    4.46
   4   7   0    5.67    2.39
  -4  -7   0    3.82    2.69
  -4   7   0    2.92    1.59
   4   7   0    1.67    2.02
  -4  -7  -1   98.64    7.09
   4   7   1   84.92    5.26
  -4  -7  -2    7.44    3.01
  -4  -7  -3  197.83   10.02
  -4  -7  -4  740.57   22.13
  -4  -7  -5  302.70   13.05
  -4  -7  -6 1510.66   36.94
  -4  -7  -7  163.89    9.84
  -4  -7  -8 1410.98   36.11
  -4  -7  -9   10.43    3.85
  -4   7  -9   15.34    4.70
  -4  -7 -10  478.23   17.61
  -4  -7 -10  472.78   18.66
  -4   7 -10  474.09   20.71
  -4  -7 -11   36.28    5.49
  -4   7 -11   38.76    6.65
  -4  -7 -11   37.73    5.48
  -4   7 -12  227.51   15.04
  -4  -7 -12  250.45   13.37
  -4  -7 -12  198.53   12.27
  -4  -7 -13   24.71    4.90
  -4   7 -13   10.51    4.74
  -4  -7 -13   27.59    5.24
  -4   7 -14   75.78   10.11
  -4   7 -15   32.17    8.05
   4   8 -16   78.28   10.38
   4   8 -15  244.78   16.75
   4   8 -14  149.38   12.78
   4  -8 -13  149.91    9.98
   4   8 -13  139.31   12.01
   4  -8 -12  539.41   19.57
   4   8 -12  555.69   23.16
   4  -8 -11  287.32   13.08
   4   8 -11  294.81   15.82
   4   8 -10    4.47    3.87
   4  -8 -10    7.52    3.09
   4  -8  -9  162.17    8.75
   4   8  -9  155.79   10.59
   4  -8  -8  651.85   18.97
   4   8  -8  621.90   21.64
   4  -8  -7   53.59    4.76
   4   8  -7   66.65    6.44
   4   8  -6  575.07   18.91
   4  -8  -6  542.05   16.34
   4  -8  -5   99.23    5.95
   4   8  -5   89.48    6.78
   4  -8  -5   83.86    3.26
   4   8  -4   13.50    2.99
   4  -8  -4   19.06    2.86
   4   8  -4   21.96    3.53
   4   8  -3  382.30   13.35
   4   8  -3  357.32   12.85
   4  -8  -3  360.44   11.90
   4   8  -2  374.31   12.89
  -4   8   2  379.17   11.20
   4   8  -2  361.12   12.62
   4   8  -1  162.87    7.76
  -4   8   1  162.99    6.81
   4   8  -1  182.64    8.31
  -4   8   0  870.64   20.30
   4   8   0  882.88   21.31
   4   8   0  841.43   21.94
  -4  -8   0  818.09   23.45
  -4  -8  -1   28.26    4.33
  -4   8  -1   32.04    3.36
   4   8   1   34.90    3.38
  -4  -8  -2   78.45    6.36
  -4  -8  -3  426.60   15.60
  -4  -8  -4  431.58   16.06
  -4  -8  -5   10.09    3.28
  -4  -8  -6    2.75    3.19
  -4  -8  -7   14.45    3.86
  -4  -8  -8  129.85    8.93
  -4  -8  -9  273.10   12.17
  -4   8  -9  272.59   15.01
  -4  -8  -9  288.75   13.86
  -4  -8 -10  294.92   14.37
  -4  -8 -10  279.75   12.83
  -4   8 -10  276.34   15.76
  -4   8 -11  304.59   17.30
  -4  -8 -11  300.05   13.94
  -4  -8 -11  317.67   15.29
  -4  -8 -12   47.68    6.19
  -4   8 -12   67.31    8.75
  -4   8 -13  104.11   11.16
  -4   8 -14  338.52   20.31
  -4   8 -15  351.72   21.01
   4   9 -16    1.43    4.62
   4   9 -15    9.08    5.51
   4   9 -14   37.71    6.97
   4   9 -13  120.97   11.17
   4   9 -12   69.91    8.41
   4   9 -11   11.55    4.43
   4  -9 -11   19.16    3.78
   4   9 -10   13.01    4.24
   4  -9 -10    7.31    3.04
   4  -9  -9  294.89   12.09
   4   9  -9  291.87   14.68
   4  -9  -8   17.16    3.48
   4   9  -8   19.90    4.33
   4   9  -7  348.24   15.01
   4  -9  -7  358.91   12.63
   4  -9  -6   90.78    5.81
   4   9  -6   88.07    7.03
   4   9  -5  588.74   19.06
   4  -9  -5  594.99   16.62
   4   9  -4   10.91    3.26
   4   9  -4    8.66    3.03
   4  -9  -4    8.26    2.25
   4   9  -3 1387.83   32.74
   4   9  -3 1470.87   33.42
   4   9  -2  121.25    7.04
   4   9  -2  131.78    7.57
  -4   9   2  130.50    6.40
   4   9  -1   10.06    2.56
   4   9  -1    6.77    2.70
  -4   9   1   12.01    2.39
   4   9   0  110.68    6.17
  -4   9   0  104.70    5.86
   4   9   0  101.88    6.72
  -4  -9   0  108.92    7.79
  -4  -9  -1    5.44    3.10
  -4   9  -1    7.28    2.19
   4   9   1    7.41    2.20
  -4  -9  -2   70.17    6.30
  -4  -9  -3  779.41   23.13
  -4  -9  -4  102.81    7.79
  -4  -9  -5 1792.65   42.35
  -4  -9  -6   10.51    3.53
  -4  -9  -7  404.37   16.34
  -4   9  -8   33.34    5.93
  -4  -9  -8   34.64    5.37
  -4   9  -9 1638.18   44.28
  -4  -9  -9 1658.67   38.33
  -4  -9  -9 1698.56   41.91
  -4  -9 -10   26.59    5.33
  -4   9 -10   26.97    6.24
  -4  -9 -11   17.60    4.25
  -4   9 -11   22.21    5.81
  -4  -9 -12    0.45    3.32
  -4   9 -12   -2.46    4.44
  -4   9 -13   22.64    6.96
  -4   9 -14    8.04    4.89
  -4   9 -15   80.65   10.76
   4  10 -16   -1.62    4.78
   4  10 -15  303.77   19.09
   4  10 -14   32.12    7.01
   4  10 -13  310.87   17.87
   4  10 -12   -2.24    3.96
   4  10 -11  378.30   18.47
   4  10 -10    3.78    3.44
   4 -10 -10    0.09    2.01
   4  10  -9   52.18    6.44
   4 -10  -9   53.36    4.97
   4  10  -8   36.32    5.76
   4 -10  -8   41.11    4.34
   4  10  -7   12.47    4.02
   4 -10  -7    7.66    2.28
   4  10  -6   16.37    3.87
   4 -10  -6   10.72    2.39
   4  10  -5   83.94    6.79
   4 -10  -5   81.39    5.30
   4  10  -5   94.21    7.23
   4  10  -4  345.40   13.28
   4  10  -4  313.89   13.20
   4 -10  -4  341.69   11.41
   4  10  -3  559.20   18.09
   4  10  -3  575.48   17.52
  -4  10   2    9.03    2.45
   4  10  -2    0.93    2.37
   4  10  -2    3.74    2.41
   4  10  -1 1532.65   35.77
  -4  10   1 1558.75   33.67
   4  10  -1 1552.53   33.99
   4  10   0   -0.40    2.91
  -4  10   0   -0.03    1.89
   4  10   0    1.42    1.73
   4  10   1  429.96   13.16
  -4  10  -1  418.25   13.99
  -4 -10  -1  468.75   16.93
  -4 -10  -2    2.16    2.54
  -4 -10  -3 1124.63   30.02
  -4 -10  -4    7.67    3.69
  -4 -10  -5   31.15    4.86
  -4 -10  -6    7.36    3.24
  -4 -10  -7   21.77    4.45
  -4  10  -8  128.53   10.15
  -4 -10  -8  151.32    9.95
  -4  10  -9  260.49   14.92
  -4 -10  -9  247.18   13.06
  -4  10 -10    9.02    4.80
  -4 -10 -10    4.01    3.37
  -4 -10 -11  550.07   21.26
  -4  10 -11  572.86   24.73
  -4  10 -12   21.06    6.01
  -4  10 -13  213.00   15.91
  -4  10 -14   -2.35    5.37
  -4  10 -15  670.53   30.44
   4  11 -16   51.73    9.42
   4  11 -15   19.81    5.86
   4  11 -14  101.09   10.76
   4  11 -13   73.92    9.40
   4  11 -12   69.64    8.76
   4  11 -11  170.24   12.50
   4  11 -10   -2.49    4.03
   4  11  -9   49.98    6.36
   4  11  -8   25.48    4.69
   4 -11  -8   29.36    3.65
   4  11  -7  627.09   21.59
   4 -11  -7  611.93   17.14
   4 -11  -6  263.51    9.86
   4  11  -6  248.15   12.29
   4  11  -5  174.19    9.82
   4 -11  -5  173.44    7.62
   4  11  -5  161.89    9.71
   4  11  -4   20.74    3.63
   4  11  -4   22.69    4.10
   4  11  -3  698.84   20.25
   4  11  -3  710.64   21.64
   4  11  -2  731.47   20.66
   4  11  -2  819.37   22.95
  -4  11   2  771.70   20.76
  -4  11   1   13.92    3.02
   4  11  -1   12.86    2.88
   4  11  -1   19.83    4.01
   4  11   0   -0.25    1.85
  -4  11   0   -2.94    2.34
   4  11   0   -5.39    3.32
   4  11   1   87.19    6.98
  -4  11  -1   88.97    6.31
   4  11   1   97.37    5.52
  -4 -11  -1   87.58    7.66
  -4  11  -2  204.63    9.86
  -4 -11  -2  207.68   11.28
  -4 -11  -3  761.26   23.79
  -4 -11  -4   24.62    4.26
  -4 -11  -5  969.73   28.20
  -4 -11  -6  391.63   16.57
  -4  11  -7  260.03   13.91
  -4 -11  -7  263.43   13.44
  -4 -11  -8   83.09    7.47
  -4  11  -8   86.65    8.66
  -4  11  -9  890.15   29.98
  -4 -11  -9  842.94   26.96
  -4  11 -10   -2.23    4.52
  -4 -11 -10    4.24    2.96
  -4 -11 -11    3.02    3.59
  -4  11 -11   11.57    5.28
  -4  11 -12   42.27    7.68
  -4  11 -13   67.56    9.56
  -4  11 -14   67.27    9.58
   4  12 -15    2.61    5.49
   4  12 -14  263.97   17.57
   4  12 -13  335.95   19.04
   4  12 -12  654.49   26.50
   4  12 -11    4.17    4.56
   4  12 -10   80.78    8.61
   4  12  -9   88.20    8.43
   4  12  -8  455.82   18.70
   4  12  -7  111.43    8.66
   4  12  -6  226.73   11.73
   4 -12  -6  210.30    8.36
   4  12  -6  173.49   10.89
   4  12  -5  245.92   11.90
   4  12  -5  262.65   12.93
   4  12  -4  187.24   10.62
   4  12  -4  182.46    9.77
   4  12  -3   30.71    4.10
   4  12  -3   31.83    4.98
   4  12  -2  415.40   13.98
  -4  12   2  386.12   14.00
   4  12  -2  411.53   15.79
   4  12  -1  342.25   14.40
  -4  12   1  347.90   13.02
   4  12  -1  340.80   12.15
   4  12   0  966.87   27.26
   4  12   0  983.39   23.53
  -4  12   0  985.68   25.46
  -4 -12  -1   37.61    5.57
  -4  12  -1   29.98    4.01
   4  12   1   37.58    5.10
   4  12   1   36.74    3.42
  -4  12  -2  233.12   10.98
  -4 -12  -2  253.00   12.81
  -4 -12  -3  153.22    9.99
  -4  12  -3  154.58    9.15
  -4 -12  -4  567.69   20.37
  -4 -12  -5   -1.82    3.01
  -4  12  -6   27.60    4.92
  -4 -12  -6   30.30    5.02
  -4  12  -7    2.65    3.32
  -4 -12  -7    4.23    2.90
  -4 -12  -8   39.21    5.66
  -4  12  -8   56.71    7.45
  -4  12  -9   59.16    8.04
  -4 -12  -9   70.81    7.29
  -4  12 -10  198.78   14.00
  -4 -12 -10  191.86   11.97
  -4  12 -11   69.51    9.15
  -4  12 -12  390.60   21.24
  -4  12 -13  351.82   20.95
  -4  12 -14  377.49   22.36
   4  13 -15    1.97    4.86
   4  13 -14   31.48    6.96
   4  13 -13   23.36    6.21
   4  13 -12   62.19    8.35
   4  13 -11   -7.71    4.59
   4  13 -10  318.47   16.83
   4  13  -9  233.09   13.93
   4  13  -8  723.04   24.94
   4  13  -7  343.00   15.55
   4  13  -7  323.39   15.93
   4  13  -6  638.97   22.88
   4  13  -6  694.25   22.36
   4  13  -5    5.11    3.17
   4  13  -5    3.91    3.64
   4  13  -4  366.40   14.41
   4  13  -4  388.62   16.19
   4  13  -3   49.86    6.15
   4  13  -3   46.03    4.96
   4  13  -2  871.16   23.05
   4  13  -2  869.07   26.01
  -4  13   2  876.10   24.30
   4  13  -1   13.70    3.45
   4  13  -1    5.56    2.20
  -4  13   1    6.48    2.73
   4  13   0   21.54    4.34
  -4  13   0   24.55    3.95
   4  13   0   25.16    3.22
   4  13   1  244.13   12.53
   4  13   1  239.40    8.95
  -4  13  -1  243.55   11.29
  -4 -13  -1  217.42   12.34
  -4 -13  -2   63.12    6.97
  -4  13  -2   65.03    6.18
  -4 -13  -3    2.32    3.21
  -4  13  -3    0.67    2.73
  -4 -13  -4 1270.50   34.59
  -4 -13  -5  215.64   12.20
  -4  13  -5  201.95   11.70
  -4 -13  -6  711.77   24.12
  -4  13  -6  667.64   23.68
  -4 -13  -7  244.85   13.29
  -4  13  -7  227.63   13.45
  -4 -13  -8  694.62   24.21
  -4  13  -8  696.51   25.95
  -4  13  -9   -6.49    4.83
  -4 -13  -9    1.64    3.21
  -4  13 -10  289.96   17.22
  -4  13 -11   -2.16    4.48
  -4  13 -12   65.85    9.45
  -4  13 -13    1.28    4.97
  -4  13 -14    5.01    4.18
   4  14 -15   33.72    7.09
   4  14 -14   64.49    8.83
   4  14 -13   -7.18    5.87
   4  14 -12  414.01   21.08
   4  14 -11  280.85   16.60
   4  14 -10  166.04   12.27
   4  14  -9   99.86    9.28
   4  14  -8  104.22    9.07
   4  14  -8   88.42    8.99
   4  14  -7    3.94    3.19
   4  14  -7    0.95    3.58
   4  14  -6   61.84    6.48
   4  14  -6   61.59    7.10
   4  14  -5    1.46    2.50
   4  14  -5    2.58    3.46
   4  14  -4  181.50    9.98
   4  14  -4  195.47   11.73
   4  14  -3  107.64    7.19
   4  14  -3  104.55    8.54
   4  14  -2 1122.81   30.86
   4  14  -2 1035.78   26.45
  -4  14   2 1028.70   28.14
   4  14  -1   14.27    4.44
  -4  14   1   16.52    3.59
   4  14  -1   18.04    2.97
   4  14   0  395.69   16.62
   4  14   0  366.30   12.14
  -4  14   0  370.25   14.72
  -4  14  -1  195.41   10.57
   4  14   1  216.83   12.12
  -4 -14  -1  199.78   12.16
  -4  14  -2  881.11   25.96
  -4 -14  -2  902.99   28.16
  -4 -14  -3  253.90   13.64
  -4  14  -3  242.99   12.56
  -4 -14  -4  512.40   20.00
  -4  14  -4  524.13   19.18
  -4  14  -4  518.20   19.41
  -4 -14  -5   18.71    4.32
  -4  14  -5   28.63    5.13
  -4 -14  -6    0.77    3.35
  -4  14  -6    2.78    3.33
  -4  14  -7    2.32    3.37
  -4 -14  -7    2.62    3.38
  -4 -14  -8   29.40    5.46
  -4  14  -8   28.62    5.81
  -4  14  -9   16.28    5.01
  -4 -14  -9   22.78    4.74
  -4  14 -10  682.61   27.62
  -4  14 -11   34.74    6.96
  -4  14 -12  171.81   14.21
  -4  14 -13    2.77    4.26
   4  15 -14    1.87    4.71
   4  15 -13   -3.22    5.41
   4  15 -12    4.03    4.79
   4  15 -11  113.10   10.66
   4  15 -10  114.67   10.46
   4  15  -9  137.37   10.77
   4  15  -9  118.34   10.62
   4  15  -8   78.04    7.81
   4  15  -8   78.65    8.61
   4  15  -7  531.74   20.52
   4  15  -7  543.83   22.09
   4  15  -6  166.02   10.52
   4  15  -6  164.31   11.51
   4  15  -5  406.96   16.20
   4  15  -5  386.36   17.78
   4  15  -4  312.53   13.41
   4  15  -4  332.31   15.82
   4  15  -3  288.04   14.68
   4  15  -3  302.23   12.54
   4  15  -2  117.56    7.17
  -4  15   2  100.98    7.78
   4  15  -2  118.92    9.25
  -4  15   1  138.61    9.04
   4  15  -1  136.89   10.14
   4  15   0   27.50    5.22
  -4  15   0   24.58    4.40
  -4  15  -1   12.24    3.29
  -4 -15  -1   13.64    4.34
  -4 -15  -2   16.03    4.82
  -4  15  -2   12.66    3.66
  -4 -15  -3  104.40    8.97
  -4  15  -3  110.10    8.66
  -4  15  -3   98.51    7.62
  -4 -15  -4  724.38   24.86
  -4  15  -4  676.00   22.70
  -4  15  -4  714.59   24.14
  -4 -15  -5  203.40   12.60
  -4  15  -5  214.98   12.63
  -4  15  -5  226.08   12.63
  -4 -15  -6   59.62    7.05
  -4  15  -6   51.82    6.50
  -4 -15  -7  123.89   10.04
  -4  15  -7  128.87   10.55
  -4 -15  -8  444.53   19.37
  -4  15  -8  451.62   20.72
  -4  15  -9  246.53   15.56
  -4  15 -10   92.43   10.02
  -4  15 -11   61.70    8.83
  -4  15 -12   35.14    7.67
  -4  15 -13   24.30    7.27
   4  16 -14   -7.15    5.63
   4  16 -13  443.71   23.07
   4  16 -12   60.45    8.38
   4  16 -11  140.72   12.11
   4  16 -10   -2.61    3.91
   4  16 -10   -3.91    5.12
   4  16  -9  284.70   15.85
   4  16  -9  288.04   16.78
   4  16  -8    0.64    3.76
   4  16  -8    3.92    3.92
   4  16  -7   79.65    7.99
   4  16  -7   98.29    9.67
   4  16  -6   18.82    4.36
   4  16  -6   19.67    4.78
   4  16  -5  257.97   12.78
   4  16  -5  278.56   15.27
   4  16  -4   15.37    3.74
   4  16  -4   10.71    4.12
   4  16  -3  145.03   10.68
   4  16  -2   80.41    8.25
  -4  16   2   83.93    7.50
  -4  16   1 1354.04   35.38
   4  16  -1 1326.72   37.33
  -4  16   0   53.26    6.16
   4  16   0   51.28    6.74
  -4  16  -1  393.42   16.52
  -4 -16  -1  389.35   18.08
  -4 -16  -2   21.63    5.15
  -4  16  -2   30.92    4.53
  -4  16  -2   39.42    5.75
  -4 -16  -3  500.99   20.93
  -4  16  -3  525.64   20.10
  -4  16  -3  516.94   18.49
  -4  16  -4   24.21    5.09
  -4  16  -4   24.53    4.58
  -4 -16  -4   26.28    5.48
  -4 -16  -5  462.98   20.00
  -4  16  -5  484.01   19.41
  -4  16  -5  527.50   20.99
  -4  16  -6    3.03    3.50
  -4 -16  -6    4.71    3.66
  -4  16  -7   39.70    6.30
  -4 -16  -7   27.88    5.56
  -4  16  -8   82.02    8.90
  -4 -16  -8   78.90    8.10
  -4  16  -9  166.40   12.98
  -4  16 -10  164.26   13.18
  -4  16 -11  161.56   13.54
  -4  16 -12   12.56    5.33
   4  17 -13   -0.82    4.92
   4  17 -12   45.61    7.68
   4  17 -11  597.19   25.84
   4  17 -11  630.22   27.41
   4  17 -10   13.07    4.84
   4  17 -10    8.72    4.52
   4  17  -9   65.16    7.85
   4  17  -9   63.50    8.45
   4  17  -8   42.69    6.54
   4  17  -8   52.63    8.10
   4  17  -7  982.91   30.18
   4  17  -7  951.37   32.49
   4  17  -6   67.74    6.93
   4  17  -6   59.99    8.02
   4  17  -5  180.46   12.56
   4  17  -4  249.79   14.74
   4  17  -3  298.87   15.88
  -4  17   2   13.45    3.93
   4  17  -2   18.44    5.12
   4  17  -1  131.98   10.51
  -4  17   1  115.44    8.91
   4  17   0   -3.06    4.52
  -4  17   0   -0.24    3.23
  -4  17  -1  131.45    9.76
  -4 -17  -1  142.04   10.97
  -4 -17  -2   65.12    7.63
  -4  17  -2   63.59    7.19
  -4 -17  -3   17.56    5.35
  -4  17  -3   21.87    5.05
  -4  17  -4    1.41    3.01
  -4 -17  -4   -2.39    4.10
  -4  17  -4    0.61    3.63
  -4  17  -5  327.76   16.62
  -4 -17  -5  342.04   17.08
  -4  17  -5  301.40   15.15
  -4  17  -6   21.55    5.64
  -4 -17  -6   19.80    5.24
  -4  17  -6   19.12    4.60
  -4 -17  -7  349.11   17.55
  -4  17  -7  322.77   17.12
  -4  17  -8   53.23    7.50
  -4  17  -9  264.97   16.58
  -4  17 -10   66.85    9.16
  -4  17 -11   61.79    8.50
  -4  17 -12    1.21    5.02
   4  18 -13  195.33   15.33
   4  18 -12   73.16    9.54
   4  18 -12  107.49   11.48
   4  18 -11   62.95    9.56
   4  18 -11   88.98    9.96
   4  18 -10  189.14   14.44
   4  18 -10  177.69   13.13
   4  18  -9  144.16   11.58
   4  18  -9  130.10   11.94
   4  18  -8   59.77    7.56
   4  18  -8   83.17    9.82
   4  18  -7   28.23    6.05
   4  18  -6  178.05   13.03
   4  18  -5   58.16    7.46
   4  18  -4   15.69    5.07
   4  18  -3   -0.48    4.22
   4  18  -2  320.21   17.20
  -4  18   2  305.87   15.25
   4  18  -1  504.07   21.63
  -4  18   1  478.19   19.75
  -4  18   0   93.35    8.58
   4  18   0  107.86    9.96
  -4  18  -1  183.97   11.84
  -4 -18  -1  180.12   12.89
  -4 -18  -2  294.65   16.44
  -4  18  -2  347.73   16.62
  -4  18  -3  383.65   17.87
  -4 -18  -3  383.09   18.83
  -4 -18  -4   43.30    6.73
  -4  18  -4   32.03    5.93
  -4  18  -5   61.45    7.55
  -4 -18  -5   62.49    7.60
  -4  18  -6   -0.28    4.07
  -4 -18  -6    3.87    3.51
  -4  18  -6   -3.85    4.09
  -4  18  -7   -4.45    4.34
  -4 -18  -7    4.85    3.71
  -4  18  -7    5.08    4.00
  -4  18  -8   12.31    5.27
  -4  18  -8    2.29    3.83
  -4  18  -9   83.60    9.65
  -4  18 -10  164.67   13.67
  -4  18 -11   60.90    9.34
   4  19 -11   23.27    6.47
   4  19 -10  195.71   15.28
   4  19  -9    6.29    4.49
   4  19  -8  398.53   21.16
   4  19  -7  101.88   10.43
   4  19  -6  371.23   19.49
   4  19  -5   -4.29    4.24
   4  19  -4  501.93   22.41
   4  19  -3   30.79    6.51
   4  19  -2  100.62    9.93
  -4  19   1   -2.92    3.27
   4  19  -1    2.13    4.10
  -4  19   0   48.92    6.39
   4  19   0   47.34    7.55
  -4 -19  -1   41.70    6.95
  -4  19  -1   43.59    6.29
  -4 -19  -2   51.57    7.47
  -4  19  -2   53.13    7.33
  -4 -19  -3   14.52    5.15
  -4  19  -3   -1.08    3.86
  -4  19  -4  511.11   22.13
  -4 -19  -4  516.62   22.59
  -4 -19  -5  105.34    9.88
  -4  19  -5   97.46    9.71
  -4 -19  -6  102.62    9.98
  -4  19  -6  108.67   10.43
  -4  19  -7   -2.69    4.30
  -4  19  -8  215.37   15.17
  -4  19  -9   57.38    8.59
  -4  19 -10   89.90   10.32
  -4  19 -11   24.23    6.99
   4  20 -10  182.03   15.20
   4  20  -9    6.54    5.26
   4  20  -8  207.99   15.52
   4  20  -7   49.67    8.02
   4  20  -6    8.06    5.37
   4  20  -5   -0.59    4.42
   4  20  -4   62.67    8.44
   4  20  -3    4.23    5.18
   4  20  -2  468.41   22.20
   4  20  -1    0.39    4.47
  -4  20   1    2.63    3.64
   4  20   0  334.63   18.41
  -4  20   0  330.00   17.16
  -4  20  -1   38.15    6.38
  -4 -20  -1   31.21    6.47
  -4  20  -2  575.28   23.50
  -4 -20  -2  577.66   24.68
  -4 -20  -3   42.47    7.14
  -4  20  -3   44.63    6.99
  -4 -20  -4  197.56   13.83
  -4  20  -4  234.19   14.89
  -4  20  -5   69.81    8.75
  -4 -20  -5   69.36    8.57
  -4  20  -6   18.21    5.93
  -4  20  -7   14.98    5.45
  -4  20  -8    6.44    4.86
  -4  20  -9    2.97    4.42
   4  21  -8  323.01   19.79
   4  21  -7  117.63   11.98
   4  21  -6  506.61   24.48
   4  21  -5   66.17    9.23
   4  21  -4   95.63   10.27
   4  21  -3    2.14    4.15
   4  21  -2  219.72   15.34
   4  21  -1   41.24    7.72
  -4  21   1   45.55    7.19
  -4  21   0   32.15    6.28
  -4 -21  -1   56.07    8.09
  -4  21  -1   62.10    7.71
  -4 -21  -2   13.82    5.54
  -4  21  -2   17.09    5.54
  -4 -21  -3   12.98    5.05
  -4  21  -3   10.11    4.89
  -4 -21  -4  166.80   13.21
  -4  21  -4  187.93   13.65
  -4  21  -5   37.81    7.06
  -4 -21  -5   27.56    6.34
  -4  21  -6  189.36   14.47
  -4  21  -7   76.35    9.58
  -4  21  -8  260.04   17.77
   4  22  -7   13.05    6.27
   4  22  -6   12.19    4.95
   4  22  -5   54.75    8.89
   4  22  -4   -7.31    5.64
   4  22  -3   83.94   10.37
   4  22  -2  103.67   11.51
   4  22  -1  218.86   16.00
  -4  22   1  242.22   15.44
  -4  22   0  371.88   19.41
  -4  22  -1  193.36   13.86
  -4 -22  -1  178.08   14.33
  -4 -22  -2   22.41    6.13
  -4  22  -2   13.24    4.62
  -4 -22  -3  118.20   11.70
  -4  22  -3  114.00   11.07
  -4  22  -4    6.09    4.77
  -4 -22  -4   -3.37    4.49
  -4  22  -5   51.30    8.19
  -4  22  -6   55.98    8.55
  -4  22  -7    0.39    4.53
   4  23  -4   -8.67    5.56
   4  23  -3  362.05   21.00
   4  23  -2   51.74    8.15
   4  23  -1   23.27    6.62
  -4  23   0   26.94    6.40
  -4 -23   0   30.13    7.38
  -4 -23  -1    4.84    5.27
  -4  23  -1    5.39    4.13
  -4 -23  -2    3.30    4.51
  -4  23  -2    5.90    4.10
  -4 -23  -3  168.82   13.84
  -4  23  -3  178.78   13.97
  -4  23  -4    2.87    4.84
  -4  23  -5  371.87   20.70
  -4  24   0   35.11    7.01
  -4 -24   0   28.38    7.21
  -4  24  -1  175.35   13.83
  -4 -24  -1  189.76   15.26
  -4 -24  -2   30.91    7.17
  -4  24  -2   16.00    5.35
  -4 -24  -3  322.39   19.46
  -4  24  -3  293.73   18.59
   5   0 -18   -0.73    4.52
   5   0 -17  108.91   11.47
   5   0 -16   -0.03    4.25
   5   0 -15   21.88    5.37
   5   0 -14   -1.82    3.57
   5   0 -13 1407.13   40.31
   5   0 -12    3.88    3.89
   5   0 -11  723.27   24.90
   5   0 -10   -1.30    3.32
   5   0  -9 3343.96   69.88
  -5   0   8    0.74    1.51
   5   0  -8    2.24    3.09
  -5   0   7   15.19    2.56
   5   0  -7   15.40    4.13
  -5   0   6    0.32    1.51
   5   0  -6    1.90    2.74
  -5   0   5  677.56   17.32
   5   0  -5  682.02   20.24
  -5   0   4   -0.02    1.80
   5   0  -4   -0.96    2.79
  -5   0   3  241.41    9.22
   5   0  -3  238.12   10.51
   5   0  -3  221.21    4.96
   5   0  -2    0.18    2.58
  -5   0   2   -0.59    2.22
  -5   0   1 4521.11   83.41
   5   0  -1 4470.00   84.23
  -5   0   0    1.07    2.58
  -5   0   0    1.07    0.60
   5   0   0    2.44    2.83
  -5   0  -1 1494.70   33.83
  -5   0  -2    8.12    3.37
  -5   0  -3 5595.75  104.45
  -5   0  -4    1.31    3.27
  -5   0  -5  712.28   22.34
  -5   0  -6    2.89    3.36
  -5   0  -7   22.85    4.64
  -5   0  -8    4.66    3.87
  -5   0  -9  559.22   21.27
  -5   0 -10   -2.05    3.95
  -5   0 -11  319.31   16.80
  -5   0 -11  358.57   17.35
  -5   0 -12   -0.58    3.77
  -5   0 -13  998.90   34.09
  -5   0 -14   11.00    5.81
  -5   0 -15  374.94   20.72
  -5   0 -16    3.32    4.88
   5   1 -18   93.80   11.27
   5  -1 -18   81.60   10.66
   5   1 -17   83.47   10.20
   5  -1 -17   61.38    8.89
   5   1 -16    4.85    4.68
   5  -1 -16    0.40    4.09
   5   1 -15  250.69   16.03
   5  -1 -15  265.35   16.20
   5   1 -14   65.99    8.07
   5  -1 -14   66.02    7.96
   5   1 -13   25.01    6.32
   5  -1 -13   24.08    5.82
   5   1 -12   56.21    7.07
   5  -1 -12   58.94    7.23
   5   1 -11  154.50   11.06
   5  -1 -11  146.63   10.46
   5   1 -10  179.95   11.41
   5  -1 -10  199.89   11.68
  -5   1   9   12.58    2.37
   5   1  -9   21.52    4.84
   5  -1  -9   16.24    4.11
  -5   1   8   35.61    3.13
   5   1  -8   47.68    5.89
   5  -1  -8   43.51    5.48
  -5   1   7 3038.37   54.80
   5   1  -7 2995.86   61.75
   5  -1  -7 2801.81   60.63
  -5  -1   7 2863.67   56.57
  -5   1   6  125.98    5.79
   5   1  -6  124.30    8.26
   5  -1  -6  123.22    7.98
  -5  -1   6  128.46    6.55
  -5  -1   5  511.81   14.75
  -5   1   5  507.90   13.79
   5   1  -5  523.54   17.26
   5  -1  -5  487.79   16.52
  -5  -1   4   92.32    5.70
   5   1  -4  100.12    7.01
  -5   1   4  104.46    5.56
   5  -1  -4   75.74    6.03
  -5  -1   3 2040.79   42.16
   5   1  -3 2041.60   36.70
   5  -1  -3 2115.60   44.23
  -5   1   3 2089.26   41.56
   5   1  -3 2169.03   44.66
  -5   1   2    1.05    1.99
  -5  -1   2    2.38    2.29
   5  -1  -2    1.77    2.60
   5   1  -2    1.99    2.77
  -5  -1   1  125.67    7.16
   5   1  -1  101.66    6.84
   5  -1  -1  127.13    7.51
  -5   1   1  129.49    6.84
  -5   1   0  123.19    3.50
  -5  -1   0  146.55    7.86
   5   1   0  134.64    7.84
   5  -1   0  157.37    8.24
  -5   1   0  142.60    7.44
  -5  -1   0  145.64    4.44
  -5  -1  -1  180.62    8.91
   5   1   1  159.73    8.68
  -5   1  -1  181.89    8.80
  -5  -1  -2   22.49    4.19
  -5   1  -2   12.84    3.46
  -5   1  -3  696.79   20.35
  -5  -1  -3  623.84   19.80
  -5   1  -4  554.24   18.56
  -5  -1  -4  541.63   18.34
  -5  -1  -5 1806.00   42.16
  -5   1  -5 1831.35   42.37
  -5   1  -6   11.33    4.04
  -5  -1  -6    7.56    3.44
  -5  -1  -7  736.09   23.82
  -5   1  -7  730.44   23.76
  -5   1  -8  262.53   13.67
  -5  -1  -8  254.95   13.28
  -5   1  -9  759.89   25.92
  -5  -1  -9  788.20   25.88
  -5  -1 -10   19.62    5.12
  -5   1 -10   29.00    5.83
  -5  -1 -11  257.41   14.65
  -5   1 -11  216.43   14.07
  -5  -1 -11  259.45   14.65
  -5  -1 -12   44.92    6.87
  -5  -1 -12   46.04    7.26
  -5   1 -12   50.30    7.33
  -5   1 -13   61.14    8.57
  -5  -1 -13   56.65    8.37
  -5   1 -14   53.85    8.51
  -5  -1 -14   62.07    8.61
  -5   1 -15   53.47    8.64
  -5  -1 -15   55.61    8.27
  -5   1 -16   77.18    9.94
  -5  -1 -16   73.75    9.77
   5  -2 -18   12.83    5.80
   5   2 -17  100.35   11.25
   5  -2 -17  124.24   11.79
   5   2 -16  231.92   16.04
   5  -2 -16  227.75   15.39
   5   2 -15   37.47    6.70
   5  -2 -15   30.82    6.01
   5   2 -14   29.57    6.16
   5  -2 -14   38.17    6.35
   5   2 -13  298.67   16.33
   5  -2 -13  275.01   15.27
   5   2 -12  875.32   29.22
   5  -2 -12  850.91   28.08
   5   2 -11  175.77   11.78
   5  -2 -11  187.47   11.70
   5   2 -10  385.39   17.04
   5  -2 -10  399.85   16.67
  -5   2   9  192.32    6.48
   5   2  -9  172.04   10.83
   5  -2  -9  174.86   10.48
   5   2  -8  170.10   10.25
  -5   2   8  158.95    6.01
   5  -2  -8  181.08   10.08
   5   2  -7    6.28    3.58
  -5   2   7    6.14    1.56
   5  -2  -7    4.63    2.52
   5  -2  -6    6.17    2.72
   5   2  -6    9.96    3.81
  -5   2   6    7.43    1.63
   5   2  -5  137.46    8.45
   5  -2  -5  147.53    8.43
  -5   2   5  139.36    6.04
  -5  -2   5  150.49    7.38
  -5   2   4  251.95    8.71
   5   2  -4  230.13   10.82
   5  -2  -4  251.50   10.85
  -5  -2   4  253.78    9.95
  -5  -2   3  600.81   17.47
   5   2  -3  624.46   18.88
   5  -2  -3  622.65   18.58
  -5   2   3  602.77   16.19
   5   2  -3  673.43   13.95
   5   2  -2  832.59   16.80
  -5  -2   2  852.03   21.87
   5  -2  -2  846.32   22.44
   5   2  -2  876.36   22.77
  -5   2   2  818.77   20.43
  -5  -2   1 2002.16   42.61
   5  -2  -1 2064.41   43.11
   5   2  -1 2037.08   43.04
  -5   2   1 2000.92   41.40
  -5  -2   0  209.20    9.77
   5  -2   0  224.91   10.08
   5   2   0  227.29   10.04
  -5   2   0  222.47    9.40
  -5   2  -1  528.48   16.18
  -5  -2  -1  506.10   16.47
   5   2   1  527.88   16.50
  -5   2  -2 4495.09   85.22
  -5  -2  -2 4483.21   85.63
  -5   2  -3 1063.49   27.73
  -5  -2  -3 1072.99   27.98
  -5   2  -4  527.36   17.90
  -5  -2  -4  507.97   17.67
  -5  -2  -5  186.17   10.30
  -5   2  -5  196.52   10.67
  -5  -2  -6    2.15    3.21
  -5   2  -6   11.01    4.14
  -5   2  -7   40.94    5.96
  -5  -2  -7   28.56    5.04
  -5  -2  -8    2.56    3.33
  -5   2  -8    6.29    3.85
  -5  -2  -9  558.72   20.95
  -5   2  -9  523.08   21.04
  -5  -2 -10 1016.40   31.24
  -5  -2 -11  459.58   19.96
  -5  -2 -11  485.75   20.58
  -5   2 -11  489.18   21.25
  -5  -2 -12   16.20    4.78
  -5  -2 -12    7.31    4.31
  -5   2 -12   19.16    5.22
  -5   2 -13  363.42   19.60
  -5  -2 -13  364.99   18.82
  -5   2 -14  627.68   27.45
  -5  -2 -14  632.45   26.48
  -5  -2 -15  132.86   12.17
  -5   2 -15  138.60   12.86
  -5   2 -16  139.26   13.27
  -5  -2 -16  114.85   11.94
   5  -3 -18  747.90   30.75
   5   3 -17   15.05    5.91
   5  -3 -17   31.79    6.76
   5   3 -16   75.94    9.82
   5  -3 -16   79.42    9.50
   5   3 -15   22.97    6.52
   5  -3 -15   19.93    5.20
   5   3 -14   73.95    8.98
   5  -3 -14   79.44    8.61
   5   3 -13   17.41    5.49
   5  -3 -13   31.41    5.75
   5   3 -12  193.81   12.83
   5  -3 -12  175.53   11.46
   5   3 -11    5.31    3.96
   5  -3 -11   12.13    4.09
   5   3 -10  494.72   19.88
   5  -3 -10  503.61   18.98
   5   3  -9   28.33    5.40
   5  -3  -9   17.07    4.07
   5   3  -8 1114.70   30.92
   5  -3  -8 1132.87   30.13
  -5   3   8 1130.31   22.15
  -5   3   7    0.97    0.96
   5   3  -7    0.01    3.09
   5  -3  -7    4.17    2.79
   5   3  -6 1966.14   44.03
   5  -3  -6 1861.31   42.60
  -5   3   6 1945.13   36.61
   5   3  -5  795.92   23.33
   5  -3  -5  828.16   22.92
  -5   3   5  837.17   18.58
   5   3  -4 2631.81   53.87
   5  -3  -4 2729.93   53.24
   5  -3  -4 2542.72   45.20
  -5   3   4 2531.45   48.51
  -5  -3   4 2588.50   51.92
  -5  -3   3  312.49   11.73
   5   3  -3  316.36   12.37
   5  -3  -3  325.28   12.31
   5   3  -3  311.41    8.89
  -5   3   3  321.72   10.27
  -5   3   2 1285.49   28.51
  -5  -3   2 1334.20   30.60
   5   3  -2 1367.29   31.46
   5  -3  -2 1307.05   30.84
   5   3  -2 1303.67   25.74
  -5  -3   1  395.80   13.58
  -5   3   1  341.99   11.88
   5   3  -1  360.46   13.23
   5  -3  -1  365.98   13.19
  -5   3   0   12.32    2.96
  -5  -3   0    9.48    3.33
   5   3   0   11.69    3.10
   5  -3   0   15.01    3.53
  -5  -3  -1  230.10   10.62
  -5   3  -1  238.10   10.14
   5   3   1  210.40    9.77
  -5  -3  -2   84.81    6.89
  -5   3  -2  103.56    7.02
  -5   3  -3 1282.38   31.99
  -5  -3  -3 1347.44   32.53
  -5  -3  -4 1837.69   42.53
  -5   3  -4 1893.83   42.71
  -5  -3  -5   47.77    5.63
  -5   3  -5   50.51    5.87
  -5  -3  -6  377.55   15.59
  -5   3  -6  377.79   15.88
  -5   3  -7    7.34    3.50
  -5  -3  -7   13.34    3.98
  -5  -3  -8 2012.10   48.04
  -5   3  -8 1975.68   48.33
  -5  -3  -9  346.32   16.14
  -5  -3 -10  116.59    9.72
  -5  -3 -11   10.08    4.51
  -5  -3 -11   15.88    4.74
  -5   3 -11   16.44    5.05
  -5   3 -12    3.99    4.53
  -5  -3 -12   15.46    4.67
  -5  -3 -12   19.82    5.06
  -5   3 -13   29.30    6.70
  -5  -3 -13   44.22    7.18
  -5  -3 -13   40.06    6.73
  -5   3 -14   17.23    6.24
  -5  -3 -14    2.29    4.42
  -5   3 -15   10.29    5.13
  -5  -3 -15   31.27    6.46
  -5   3 -16  195.90   15.87
  -5  -3 -16  172.46   14.04
   5  -4 -18  132.40   12.35
   5   4 -17   -0.69    4.06
   5  -4 -17    9.16    5.09
   5   4 -16  232.75   16.41
   5  -4 -16  197.88   14.09
   5   4 -15   11.12    4.36
   5  -4 -15   25.33    5.83
   5   4 -14  485.23   22.56
   5  -4 -14  470.17   20.80
   5   4 -13  102.57   10.09
   5  -4 -13   95.36    8.75
   5   4 -12  661.06   25.17
   5  -4 -12  652.35   23.53
   5   4 -11   55.65    6.95
   5  -4 -11   42.12    5.60
   5  -4 -10   97.22    7.92
   5   4 -10  103.47    8.78
   5   4  -9  336.16   15.41
   5  -4  -9  300.78   13.79
   5   4  -8 1017.95   29.11
   5  -4  -8 1001.71   27.55
  -5   4   7   27.48    1.85
   5   4  -7   24.04    4.62
   5  -4  -7   30.29    4.53
   5   4  -6  349.97   14.38
  -5   4   6  351.05    9.10
   5  -4  -6  357.51   13.64
   5  -4  -5   -1.03    2.60
  -5   4   5    0.79    1.25
   5   4  -5    0.36    3.32
   5  -4  -4  107.04    7.01
   5   4  -4  116.85    7.67
  -5   4   4  103.43    5.11
   5  -4  -4  107.32    3.87
   5   4  -4   88.84    5.16
  -5  -4   4  110.53    7.09
  -5   4   3   74.46    4.60
   5   4  -3   55.51    5.38
   5  -4  -3   72.28    5.68
   5   4  -3   70.18    4.11
  -5  -4   3   68.19    5.62
  -5  -4   2 2063.89   43.57
   5   4  -2 2055.54   38.86
   5   4  -2 2044.08   43.62
   5  -4  -2 2011.83   43.31
  -5   4   2 2003.93   40.87
  -5  -4   1  424.59   14.56
   5  -4  -1  393.02   13.90
  -5   4   1  394.20   12.86
   5   4  -1  404.54   14.00
  -5  -4   0 1322.66   29.57
  -5   4   0 1293.02   27.88
   5   4   0 1331.29   28.59
  -5   4  -1    2.64    2.84
  -5  -4  -1    1.18    3.08
   5   4   1    3.48    2.38
  -5  -4  -2 1593.46   38.31
  -5   4  -2 1769.79   38.35
  -5   4  -3  273.66   12.10
  -5  -4  -3  279.04   12.47
  -5   4  -4  839.35   24.39
  -5  -4  -4  838.76   24.40
  -5   4  -5  133.42    9.10
  -5  -4  -5  125.77    8.73
  -5   4  -6   20.49    4.31
  -5  -4  -6   22.70    4.53
  -5   4  -7  123.23    9.38
  -5  -4  -7  127.80    9.16
  -5  -4  -8    0.61    3.67
  -5  -4  -9   12.67    3.86
  -5  -4 -10  444.47   19.09
  -5  -4 -11   33.59    5.90
  -5  -4 -11   21.24    5.02
  -5   4 -11   35.52    6.79
  -5  -4 -12  234.20   14.20
  -5  -4 -12  254.37   14.51
  -5   4 -12  224.78   14.95
  -5  -4 -13   97.30    9.64
  -5   4 -13   94.65   10.40
  -5  -4 -13   96.37    9.60
  -5   4 -14  528.26   25.48
  -5  -4 -14  557.61   24.08
  -5   4 -15   22.47    6.49
  -5  -4 -15   20.33    5.71
  -5  -4 -16   65.24    8.88
   5   5 -17  226.85   17.01
   5  -5 -17  194.88   14.27
   5   5 -16   20.29    6.07
   5  -5 -16   14.33    4.97
   5   5 -15  186.94   14.33
   5  -5 -15  182.52   12.94
   5   5 -14  142.92   12.27
   5  -5 -14  141.32   11.06
   5   5 -13    9.98    5.17
   5  -5 -13   -2.24    3.22
   5   5 -12  290.77   16.26
   5  -5 -12  289.16   14.67
   5   5 -11  287.56   15.57
   5  -5 -11  288.00   14.08
   5   5 -10   12.95    4.66
   5  -5 -10   14.10    3.87
   5   5  -9  197.57   11.94
   5  -5  -9  188.51   10.56
   5   5  -8 1248.08   33.70
   5  -5  -8 1233.91   31.62
   5   5  -7 1396.44   35.32
   5  -5  -7 1335.27   33.23
   5   5  -6  483.11   17.14
  -5   5   6  432.61   10.13
   5  -5  -6  492.05   16.39
   5   5  -5  471.09   16.69
   5  -5  -5  453.67   15.55
  -5   5   5  468.56   11.52
   5   5  -4  553.47   17.61
   5   5  -4  528.15   14.55
   5  -5  -4  515.22   16.44
  -5   5   4  514.31   13.18
   5   5  -3 1039.00   26.74
   5   5  -3 1064.97   23.29
   5  -5  -3 1040.75   25.97
  -5   5   3 1001.61   23.00
  -5  -5   3 1038.61   26.69
   5   5  -2 1897.14   41.25
   5  -5  -2 1955.62   40.96
   5   5  -2 1886.15   37.19
  -5   5   2 1819.82   38.10
  -5  -5   2 1889.97   41.48
  -5  -5   1    4.54    3.12
   5   5  -1    0.99    1.56
  -5   5   1    1.41    0.93
   5   5  -1    0.66    2.54
  -5   5   1    2.96    2.39
   5  -5  -1   -0.30    2.47
  -5   5   0  566.34   16.58
  -5  -5   0  599.09   18.21
  -5   5   0  511.12   12.19
   5   5   0  588.63   17.19
  -5   5  -1  338.88   12.74
  -5  -5  -1  315.64   13.18
   5   5   1  367.55   12.92
  -5  -5  -2  193.24   10.11
  -5   5  -2  176.15    9.34
  -5  -5  -3  169.34    9.71
  -5   5  -3  164.00    9.37
  -5   5  -4 1234.19   31.92
  -5  -5  -4 1222.91   31.87
  -5  -5  -5  783.41   23.93
  -5   5  -5  780.26   24.37
  -5  -5  -6  512.63   18.79
  -5  -5  -7  567.97   20.35
  -5  -5  -8  351.83   15.89
  -5  -5  -9  510.45   20.10
  -5  -5 -10   89.91    8.50
  -5  -5 -11   49.22    6.50
  -5  -5 -11   43.17    5.95
  -5   5 -11   44.03    6.85
  -5  -5 -12   72.09    8.11
  -5  -5 -12   63.69    7.51
  -5   5 -12   69.10    9.04
  -5   5 -13   15.06    5.58
  -5  -5 -13   28.01    5.65
  -5  -5 -13   24.39    5.39
  -5  -5 -14  102.40   10.24
  -5   5 -14  105.52   11.51
  -5  -5 -14  102.46   10.18
  -5   5 -15  267.69   18.39
  -5  -5 -15  226.47   15.29
   5   6 -17  294.67   19.45
   5   6 -16    8.42    5.63
   5  -6 -16    5.35    3.83
   5   6 -15  162.64   13.66
   5  -6 -15  163.91   12.05
   5  -6 -14  152.97   11.25
   5   6 -14  149.37   12.48
   5   6 -13  905.07   32.01
   5  -6 -13  916.97   29.34
   5   6 -12    6.24    5.06
   5  -6 -12    5.92    3.46
   5   6 -11  696.89   25.90
   5  -6 -11  776.55   24.55
   5   6 -10  130.50   10.22
   5  -6 -10  140.49    9.19
   5   6  -9  339.71   15.83
   5  -6  -9  322.87   14.03
   5   6  -8   21.26    4.43
   5  -6  -8   22.71    4.21
   5   6  -7   50.94    6.18
   5  -6  -7   52.19    5.26
   5   6  -6  498.32   17.82
   5  -6  -6  479.63   16.34
   5  -6  -5   62.56    5.38
   5   6  -5   61.74    5.97
   5   6  -4   53.25    4.42
   5   6  -4   68.04    6.09
   5  -6  -4   55.50    5.12
   5   6  -3  430.75   13.08
   5   6  -3  444.05   15.41
   5  -6  -3  445.56   14.94
  -5   6   3  437.53   12.48
   5   6  -2   60.79    4.41
  -5  -6   2   49.52    5.38
  -5   6   2   42.31    3.89
   5   6  -2   56.57    5.18
   5  -6  -2   44.40    4.65
  -5  -6   1 2354.64   49.38
   5   6  -1 2360.83   45.31
   5   6  -1 2298.06   47.80
  -5   6   1 2211.16   46.03
  -5   6   1 2270.04   41.79
  -5  -6   0  197.91   10.19
  -5   6   0  227.07    7.14
   5   6   0  195.52    9.21
  -5   6   0  200.69    9.21
  -5  -6  -1 1436.17   35.01
   5   6   1 1424.19   32.94
  -5   6  -1 1477.68   33.74
  -5   6  -2    8.15    2.95
  -5  -6  -2   11.61    3.37
  -5  -6  -3 1349.77   34.19
  -5   6  -3 1345.79   33.54
  -5  -6  -4  109.68    8.03
  -5  -6  -5    0.50    3.08
  -5  -6  -6  104.38    8.26
  -5  -6  -7    2.95    3.33
  -5  -6  -8   19.79    4.56
  -5  -6  -9  298.40   14.99
  -5   6 -10    7.93    4.70
  -5  -6 -10    0.55    3.35
  -5  -6 -11  220.08   12.70
  -5   6 -11  225.82   14.84
  -5  -6 -11  242.20   13.92
  -5  -6 -12   68.62    7.60
  -5  -6 -12   57.57    7.37
  -5   6 -12   66.36    8.60
  -5  -6 -13  384.52   18.70
  -5   6 -13  367.80   20.67
  -5  -6 -13  393.46   18.73
  -5   6 -14    2.80    4.49
  -5   6 -15  491.91   25.59
   5   7 -16   65.73    9.78
   5   7 -15  107.44   11.58
   5  -7 -14   37.14    5.99
   5   7 -14   41.42    7.49
   5   7 -13  114.05   11.05
   5  -7 -13  115.21    9.60
   5   7 -12   10.46    4.92
   5  -7 -12    8.11    3.76
   5   7 -11  424.27   19.39
   5  -7 -11  397.44   16.72
   5   7 -10   47.70    6.63
   5  -7 -10   46.93    5.58
   5   7  -9  410.32   17.83
   5  -7  -9  420.33   16.01
   5   7  -8   17.59    4.45
   5  -7  -8   16.45    3.49
   5   7  -7  971.44   28.46
   5  -7  -7 1011.66   26.59
   5   7  -6    4.72    2.78
   5  -7  -6   -1.43    2.44
   5   7  -5 1125.48   29.73
   5  -7  -5 1113.42   27.72
   5   7  -4    7.26    2.81
   5  -7  -4    2.17    2.22
   5   7  -4    4.61    2.09
   5   7  -3 1866.88   41.50
   5   7  -3 1856.44   38.97
   5  -7  -3 1855.32   40.37
  -5  -7   2   68.16    6.57
   5   7  -2   60.40    5.42
   5   7  -2   60.05    4.59
   5  -7  -2   52.73    4.92
   5   7  -1  183.47    8.23
   5   7  -1  185.45    9.15
  -5   7   1  195.08    6.72
  -5  -7   1  186.30   10.13
  -5   7   0   14.28    2.05
  -5  -7   0   12.04    3.80
   5   7   0   10.47    2.83
  -5  -7  -1  377.35   14.80
   5   7   1  383.00   13.33
  -5  -7  -2   39.13    5.18
  -5  -7  -3 1080.57   29.42
  -5  -7  -4  160.63    9.84
  -5  -7  -5  572.31   20.14
  -5  -7  -6    9.36    3.89
  -5  -7  -7  593.68   21.39
  -5  -7  -8  245.94   13.20
  -5  -7  -9 1699.90   43.62
  -5  -7 -10  140.90   10.70
  -5   7 -10  147.93   11.81
  -5  -7 -11    3.13    3.69
  -5  -7 -11    0.77    2.71
  -5   7 -11   -4.49    4.22
  -5   7 -12   10.43    5.55
  -5  -7 -12    9.31    4.12
  -5  -7 -12   15.35    4.44
  -5  -7 -13   46.75    6.81
  -5   7 -13   70.38    9.61
  -5   7 -14   40.46    9.20
  -5   7 -15  370.80   22.34
   5   8 -16   22.52    6.85
   5   8 -15   78.86   10.08
   5   8 -14  224.49   15.70
   5   8 -13  231.42   15.40
   5  -8 -13  241.00   13.36
   5   8 -12  498.19   22.26
   5  -8 -12  504.68   19.33
   5   8 -11  197.41   13.14
   5  -8 -11  183.78   10.75
   5   8 -10  239.92   13.95
   5  -8 -10  220.43   11.55
   5   8  -9  164.89   11.16
   5  -8  -9  164.66    9.52
   5   8  -8  187.33   11.61
   5  -8  -8  203.11   10.25
   5   8  -7   43.09    5.99
   5  -8  -7   42.87    4.97
   5   8  -6  236.16   12.02
   5  -8  -6  233.10   10.58
   5   8  -5    7.35    3.20
   5   8  -5    6.10    2.54
   5  -8  -5    8.92    2.74
   5   8  -4   95.30    6.39
   5   8  -4   84.97    6.82
   5  -8  -4   94.99    6.38
   5  -8  -3  748.47   20.69
   5   8  -3  766.99   21.83
   5   8  -3  727.96   20.16
   5   8  -2  749.52   20.05
   5   8  -2  689.49   20.51
   5   8  -1  731.09   19.86
  -5   8   1  749.54   17.67
   5   8  -1  724.40   20.59
  -5  -8   1  719.93   22.53
  -5  -8   0  827.43   24.49
  -5   8   0  855.48   19.71
   5   8   0  820.51   22.07
  -5  -8  -1  283.31   12.85
  -5   8  -1  277.85    9.72
   5   8   1  264.87   10.82
  -5  -8  -2  111.39    8.15
  -5  -8  -3  740.88   23.28
  -5  -8  -4  204.49   11.40
  -5  -8  -5  136.15    9.42
  -5  -8  -6   37.06    5.26
  -5  -8  -7  131.75    9.67
  -5  -8  -8  194.09   11.94
  -5  -8  -9  532.61   20.86
  -5  -8 -10  199.56   12.58
  -5  -8 -10  209.16   11.60
  -5   8 -10  196.27   13.86
  -5   8 -11   72.16    9.17
  -5  -8 -11   62.20    6.67
  -5  -8 -11   58.88    7.14
  -5   8 -12  371.76   20.50
  -5  -8 -12  418.62   19.10
  -5   8 -13   97.59   11.07
  -5   8 -14  310.56   19.80
   5   9 -16  220.19   16.68
   5   9 -15   11.10    5.72
   5   9 -14  279.45   17.67
   5   9 -13   26.01    6.29
   5   9 -12  118.38   11.02
   5   9 -11   34.01    6.52
   5  -9 -11   54.94    6.06
   5   9 -10    3.70    4.03
   5  -9 -10    3.07    2.56
   5   9  -9   -3.50    3.82
   5  -9  -9    4.63    2.70
   5   9  -8  424.49   18.24
   5  -9  -8  461.22   16.12
   5   9  -7  402.92   17.09
   5  -9  -7  447.10   15.29
   5   9  -6  645.96   21.67
   5  -9  -6  680.55   19.70
   5   9  -5  126.56    8.59
   5   9  -5  135.94    8.10
   5  -9  -5  115.44    7.19
   5   9  -4  335.98   13.93
   5  -9  -4  349.54   12.78
   5   9  -4  350.13   13.24
   5   9  -3   51.17    4.97
   5   9  -3   55.18    5.43
   5   9  -2 1019.49   26.60
  -5   9   2 1016.21   23.16
   5   9  -2 1034.23   26.07
   5   9  -1  144.88    8.04
   5   9  -1  134.06    7.86
  -5   9   1  141.22    6.54
  -5  -9   1  145.41    9.43
   5   9   0  265.27   11.32
   5   9   0  275.12   11.13
  -5   9   0  289.30    9.96
  -5  -9   0  269.29   12.94
  -5  -9  -1   11.16    3.48
  -5   9  -1    9.47    2.52
   5   9   1    9.14    2.55
  -5  -9  -2    2.03    3.07
  -5  -9  -3  124.94    8.92
  -5  -9  -4  192.82   11.34
  -5  -9  -5  223.93   12.36
  -5  -9  -6  517.66   19.83
  -5  -9  -7  102.65    8.70
  -5  -9  -8  742.42   25.20
  -5   9  -9  160.08   12.04
  -5  -9  -9  153.71   10.77
  -5  -9 -10  623.73   23.63
  -5   9 -10  632.24   25.55
  -5  -9 -11   37.01    6.19
  -5   9 -11   34.00    6.83
  -5  -9 -12  183.04   12.55
  -5   9 -12  154.24   13.46
  -5   9 -13   -3.43    5.59
  -5   9 -14  122.78   12.85
   5  10 -16   85.39   10.67
   5  10 -15    6.95    4.72
   5  10 -14  430.00   22.38
   5  10 -13   -0.64    4.36
   5  10 -12  565.46   24.38
   5  10 -11   35.40    6.43
   5  10 -10  325.79   16.79
   5 -10 -10  311.13   13.56
   5  10  -9    7.67    4.32
   5 -10  -9   18.96    3.64
   5  10  -8 1079.95   31.85
   5 -10  -8 1062.28   27.57
   5  10  -7   17.99    4.17
   5 -10  -7   26.89    4.04
   5  10  -6  234.74   12.38
   5 -10  -6  275.71   11.29
   5  10  -6  254.16   12.35
   5  10  -5   20.40    4.14
   5  10  -5   19.48    4.18
   5 -10  -5   18.84    3.35
   5  10  -4   71.61    6.48
   5 -10  -4   67.77    5.54
   5  10  -4   73.86    6.43
   5  10  -3  196.68    9.95
   5  10  -3  183.86    9.63
   5  10  -2 1311.58   32.24
  -5  10   2 1415.66   30.06
   5  10  -2 1298.63   32.32
   5  10  -1   39.25    4.58
  -5  10   1   48.87    4.19
   5  10  -1   51.63    4.99
  -5 -10   1   40.88    5.77
   5  10   0  553.05   17.98
  -5  10   0  538.69   15.87
   5  10   0  569.55   17.08
  -5 -10   0  574.16   20.14
  -5 -10  -1   19.10    4.66
  -5  10  -1   11.67    2.62
   5  10   1   17.48    3.08
  -5  10  -2  114.21    6.99
  -5 -10  -2  110.15    8.51
  -5 -10  -3   47.05    6.04
  -5 -10  -4  489.26   19.12
  -5 -10  -5   -5.42    4.30
  -5 -10  -6   -2.44    3.52
  -5 -10  -7   39.85    6.14
  -5 -10  -8   26.23    5.08
  -5  10  -9    6.94    4.32
  -5 -10  -9    9.90    4.18
  -5 -10 -10  197.37   12.53
  -5  10 -10  176.71   13.25
  -5 -10 -11   33.28    6.23
  -5  10 -11   36.05    6.89
  -5  10 -12  189.38   14.78
  -5  10 -13    9.32    5.76
  -5  10 -14  363.43   21.93
   5  11 -15   -3.20    4.55
   5  11 -14  139.20   12.77
   5  11 -13   19.97    6.20
   5  11 -12  124.64   11.55
   5  11 -11   14.66    5.07
   5  11 -10   91.63    9.09
   5  11  -9   48.95    6.81
   5  11  -8  584.61   22.09
   5 -11  -8  575.80   18.12
   5  11  -7    6.78    3.64
   5  11  -7    9.73    4.02
   5 -11  -7    9.91    2.94
   5  11  -6  296.69   13.94
   5  11  -6  299.96   13.77
   5 -11  -6  276.28   11.48
   5  11  -5  456.76   17.06
   5  11  -5  432.24   16.91
   5 -11  -5  431.38   14.59
   5  11  -4   13.53    3.69
   5  11  -4    9.99    3.19
   5  11  -3  165.09    9.20
   5  11  -3  154.37    9.26
   5  11  -2  108.51    7.38
   5  11  -2  103.84    7.60
  -5  11   2  113.29    6.66
  -5  11   1   31.25    3.51
   5  11  -1   33.48    4.17
   5  11  -1   34.03    4.86
  -5 -11   1   25.85    4.72
   5  11   0  102.07    7.54
  -5  11   0   95.40    6.17
   5  11   0  119.96    7.14
  -5 -11   0  114.00    8.78
  -5 -11  -1   -0.04    3.22
  -5  11  -1   -1.45    2.09
   5  11   1    2.82    2.57
  -5  11  -2   10.65    2.96
  -5 -11  -2    8.38    3.74
  -5 -11  -3  249.63   13.21
  -5 -11  -4  630.17   22.50
  -5 -11  -5   10.80    4.02
  -5 -11  -6  406.64   17.80
  -5 -11  -7  151.22   10.68
  -5  11  -8  721.84   26.59
  -5 -11  -8  732.12   25.66
  -5  11  -9  338.98   18.04
  -5 -11  -9  323.88   16.44
  -5 -11 -10  104.63    9.53
  -5  11 -10   90.67    9.81
  -5 -11 -11   -4.74    4.28
  -5  11 -11   -4.27    4.18
  -5  11 -12   25.70    6.70
  -5  11 -13   32.20    6.93
  -5  11 -14   28.58    7.35
   5  12 -15   59.99    9.37
   5  12 -14   20.05    6.27
   5  12 -13  237.94   16.40
   5  12 -12  332.99   18.73
   5  12 -11  397.01   19.74
   5  12 -10   84.70    9.04
   5  12  -9  106.42    9.41
   5  12  -8   34.91    5.84
   5  12  -7   -1.33    3.85
   5  12  -7    4.08    3.26
   5  12  -6  177.01   10.83
   5  12  -6  180.34   11.02
   5 -12  -6  174.48    8.66
   5  12  -5   89.02    7.55
   5  12  -5   99.63    8.02
   5  12  -4   97.52    7.53
   5  12  -4  121.95    8.74
   5  12  -3  315.40   14.10
   5  12  -3  338.45   13.72
  -5  12   2  407.69   14.06
   5  12  -2  401.02   14.80
   5  12  -2  400.64   15.79
  -5  12   1   29.67    3.92
   5  12  -1   23.22    4.58
   5  12  -1   26.67    3.87
  -5 -12   0    8.14    4.00
  -5  12   0    9.29    2.78
   5  12   0    4.44    2.37
   5  12   0    4.86    2.86
  -5  12  -1  218.12   10.22
   5  12   1  212.84    9.47
  -5 -12  -1  201.06   12.09
  -5 -12  -2  516.99   20.25
  -5  12  -2  554.07   17.90
  -5 -12  -3  975.67   30.12
  -5  12  -3 1067.60   27.96
  -5 -12  -4    4.09    3.50
  -5 -12  -5   11.19    4.32
  -5 -12  -6   70.48    7.56
  -5 -12  -7   65.55    7.42
  -5 -12  -8   10.90    4.19
  -5  12  -8   11.93    4.86
  -5  12  -9  262.23   15.96
  -5 -12  -9  250.11   14.54
  -5  12 -10  434.02   21.56
  -5 -12 -10  407.53   19.02
  -5  12 -11  100.47   10.79
  -5  12 -12   14.91    5.67
  -5  12 -13   50.35    8.81
   5  13 -15   35.87    7.81
   5  13 -14   -2.99    4.43
   5  13 -13   13.35    5.97
   5  13 -12    9.12    4.63
   5  13 -11  384.10   19.57
   5  13 -10   11.93    4.92
   5  13  -9  337.88   17.09
   5  13  -8    6.13    4.13
   5  13  -8    5.11    3.97
   5  13  -7  984.11   30.72
   5  13  -7 1141.57   32.50
   5  13  -6   92.80    8.35
   5  13  -6   85.66    7.55
   5  13  -5  313.53   14.27
   5  13  -5  296.23   14.34
   5  13  -4    3.03    3.11
   5  13  -4    6.56    3.79
   5  13  -3  652.42   20.66
   5  13  -3  653.40   21.90
   5  13  -2  279.09   12.16
   5  13  -2  284.09   13.68
  -5  13   2  290.71   12.13
  -5  13   1   87.25    6.39
   5  13  -1   70.96    5.78
   5  13  -1   88.60    7.48
  -5 -13   0   58.86    7.15
   5  13   0   50.00    6.04
  -5  13   0   56.20    5.29
   5  13   0   55.43    5.01
  -5 -13  -1   26.67    5.52
  -5  13  -1    8.08    2.89
   5  13   1   18.03    2.99
  -5 -13  -2   14.49    4.58
  -5  13  -2   16.65    3.70
  -5 -13  -3  288.67   14.97
  -5  13  -3  330.94   14.08
  -5 -13  -4   47.27    6.76
  -5 -13  -5  604.98   23.01
  -5 -13  -6  253.09   14.48
  -5  13  -7  329.35   17.04
  -5 -13  -7  337.40   16.69
  -5 -13  -8  115.65    9.86
  -5  13  -8  104.83   10.18
  -5  13  -9  302.41   17.32
  -5 -13  -9  311.85   16.38
  -5 -13 -10   -2.15    3.49
  -5  13 -10    4.38    4.79
  -5  13 -11   32.17    6.84
  -5  13 -12    8.02    5.74
  -5  13 -13   47.71    8.93
   5  14 -14   35.01    7.62
   5  14 -13  831.69   32.66
   5  14 -12    0.53    4.42
   5  14 -11  184.92   13.73
   5  14 -10   57.95    7.60
   5  14  -9  399.85   19.18
   5  14  -9  432.84   19.71
   5  14  -8   13.87    5.09
   5  14  -8    9.10    4.05
   5  14  -7    4.61    3.77
   5  14  -7    5.27    4.24
   5  14  -6   96.43    8.26
   5  14  -6   95.17    8.71
   5  14  -5  423.73   17.97
   5  14  -5  401.39   16.65
   5  14  -4    3.30    2.78
   5  14  -4    3.83    3.90
   5  14  -3  209.63   12.07
   5  14  -3  201.64   10.64
   5  14  -2   12.44    4.22
   5  14  -2   11.40    2.83
  -5  14   2   12.84    3.27
  -5  14   1 1459.53   35.05
   5  14  -1 1437.25   33.69
   5  14  -1 1407.57   37.48
  -5  14   0  204.43   10.51
   5  14   0  230.74    9.99
   5  14   0  213.35   12.25
  -5 -14   0  215.71   13.15
  -5  14  -1  253.35   12.00
  -5 -14  -1  261.34   14.50
  -5 -14  -2  108.87    9.42
  -5  14  -2  119.13    8.34
  -5 -14  -3  413.70   18.53
  -5  14  -3  438.43   17.07
  -5 -14  -4  312.97   16.02
  -5  14  -4  327.80   14.89
  -5 -14  -5   14.71    4.62
  -5  14  -6    4.01    4.56
  -5 -14  -6    6.14    3.64
  -5  14  -7   11.61    4.49
  -5 -14  -7    9.27    4.30
  -5 -14  -8   57.24    7.42
  -5  14  -8   60.71    7.78
  -5  14  -9  152.80   12.64
  -5 -14  -9  139.45   11.07
  -5  14 -10    3.62    4.16
  -5  14 -11  185.20   14.75
  -5  14 -12   40.34    8.39
   5  15 -14   21.01    6.82
   5  15 -13   73.15    9.83
   5  15 -12   28.35    6.88
   5  15 -11  186.76   13.98
   5  15 -10  112.96   10.62
   5  15 -10  105.05   10.30
   5  15  -9    6.59    4.53
   5  15  -9   -2.16    4.30
   5  15  -8  405.58   18.56
   5  15  -8  360.13   18.24
   5  15  -7  519.29   20.70
   5  15  -7  509.01   21.63
   5  15  -6  701.85   23.97
   5  15  -6  668.42   24.75
   5  15  -5    9.81    4.27
   5  15  -5    5.17    3.15
   5  15  -4  569.09   20.04
   5  15  -4  580.07   21.92
   5  15  -3  325.17   15.86
   5  15  -3  337.99   14.07
  -5  15   2  226.78   11.55
   5  15  -2  243.74   13.51
   5  15  -2  220.71   10.85
  -5  15   1    2.53    2.84
   5  15  -1   -1.54    3.23
  -5 -15   0    3.28    3.65
   5  15   0   -1.98    3.86
  -5  15   0   -1.92    2.58
  -5 -15  -1   85.86    8.64
  -5  15  -1  109.87    8.18
  -5 -15  -2  181.98   12.56
  -5  15  -2  164.46   10.08
  -5 -15  -3   27.57    5.75
  -5  15  -3   19.72    4.33
  -5 -15  -4  663.31   24.14
  -5  15  -4  483.39   19.80
  -5 -15  -5  222.96   13.90
  -5  15  -5  226.83   13.25
  -5  15  -5  253.61   13.80
  -5 -15  -6  217.95   13.71
  -5  15  -6  187.26   12.44
  -5  15  -7   91.38    9.23
  -5 -15  -7  102.64    9.62
  -5 -15  -8  224.86   14.23
  -5  15  -8  231.85   14.84
  -5 -15  -9   90.55    9.10
  -5  15  -9   87.56   10.03
  -5  15 -10  144.49   12.83
  -5  15 -11   19.61    6.95
  -5  15 -12    4.98    5.19
   5  16 -13  109.72   11.66
   5  16 -12  556.99   25.70
   5  16 -11    5.95    4.26
   5  16 -11   13.46    5.18
   5  16 -10  243.12   15.73
   5  16 -10  276.17   16.75
   5  16  -9   32.57    6.25
   5  16  -9   43.24    7.37
   5  16  -8   54.48    7.17
   5  16  -8   52.88    8.02
   5  16  -7   13.77    4.47
   5  16  -7   11.37    5.27
   5  16  -6    0.84    3.75
   5  16  -6   10.76    3.98
   5  16  -5    4.54    3.29
   5  16  -5    1.60    3.76
   5  16  -4  159.51    9.95
   5  16  -4  165.96   11.72
   5  16  -3   33.96    5.71
  -5  16   2  943.70   27.30
   5  16  -2  888.38   29.28
  -5  16   1  116.02    8.60
   5  16  -1  114.88    9.75
   5  16   0  431.59   19.28
  -5  16   0  482.64   18.16
  -5 -16   0  457.91   20.62
  -5 -16  -1   13.39    4.29
  -5  16  -1   14.13    3.89
  -5 -16  -2 1099.07   34.61
  -5  16  -2 1130.99   31.80
  -5 -16  -3   63.51    7.82
  -5  16  -3   50.74    6.32
  -5 -16  -4  290.92   16.36
  -5  16  -4  342.60   16.23
  -5  16  -4  318.68   15.49
  -5  16  -5    7.89    3.78
  -5 -16  -5    8.65    4.65
  -5  16  -5    1.32    3.31
  -5  16  -6   22.25    5.08
  -5  16  -6   16.63    4.58
  -5 -16  -6   22.48    5.45
  -5  16  -7    4.43    3.60
  -5 -16  -7    7.52    4.32
  -5 -16  -8   30.94    6.26
  -5  16  -8   37.71    6.88
  -5  16  -9   20.94    6.02
  -5  16 -10  542.87   25.55
  -5  16 -11   17.54    6.26
  -5  16 -12   71.55   10.53
   5  17 -13   -1.47    4.55
   5  17 -12   89.98   10.88
   5  17 -12   84.70   10.65
   5  17 -11    0.52    4.97
   5  17 -11   13.34    5.56
   5  17 -10  411.28   20.60
   5  17 -10  425.51   21.49
   5  17  -9   19.44    6.02
   5  17  -9   20.51    5.79
   5  17  -8  348.07   17.53
   5  17  -8  345.99   18.70
   5  17  -7   -3.91    3.96
   5  17  -7    2.87    4.02
   5  17  -6  502.30   20.02
   5  17  -6  489.40   21.67
   5  17  -5   32.38    6.26
   5  17  -4  702.27   25.94
   5  17  -3    3.83    4.21
  -5  17   2  171.39   10.61
   5  17  -2  169.05   12.17
   5  17  -1    9.70    4.89
  -5  17   1    7.00    3.54
  -5 -17   0    2.17    3.95
   5  17   0    8.11    4.54
  -5  17   0    6.90    3.71
  -5  17  -1  111.47    8.85
  -5 -17  -1  106.12   10.08
  -5 -17  -2   35.12    6.61
  -5  17  -2   35.34    5.61
  -5  17  -3    2.95    3.15
  -5 -17  -3    9.28    5.16
  -5 -17  -4  812.47   29.11
  -5  17  -4  815.94   27.46
  -5  17  -4  795.32   26.34
  -5  17  -5   19.82    5.32
  -5 -17  -5   26.74    5.80
  -5  17  -5   27.98    5.42
  -5 -17  -6   60.38    8.20
  -5  17  -6   58.84    7.57
  -5  17  -6   61.42    7.46
  -5 -17  -7  110.79   10.62
  -5  17  -7  136.66   11.27
  -5  17  -7  119.75   10.80
  -5 -17  -8  608.32   24.91
  -5  17  -8  573.83   25.11
  -5  17  -9   19.94    6.19
  -5  17 -10   44.03    8.28
  -5  17 -11   31.62    7.41
   5  18 -12  225.05   16.44
   5  18 -11   17.76    6.00
   5  18 -11    2.91    4.38
   5  18 -10   32.27    6.93
   5  18 -10   33.20    6.71
   5  18  -9   93.74    9.70
   5  18  -9   69.74    9.07
   5  18  -8   68.61    8.92
   5  18  -7    3.13    4.20
   5  18  -6    9.42    4.63
   5  18  -5  108.54   10.09
   5  18  -4   10.72    5.16
   5  18  -3   42.15    6.99
   5  18  -2  293.07   16.42
   5  18  -1  406.53   19.45
  -5  18   1  396.39   17.63
  -5  18   0  219.39   12.85
  -5 -18   0  200.74   14.12
  -5  18  -1  277.09   14.58
  -5 -18  -1  300.41   17.27
  -5 -18  -2  342.38   18.43
  -5  18  -2  340.94   16.46
  -5 -18  -3  124.10   11.14
  -5  18  -3  132.69   10.24
  -5 -18  -4   70.38    8.67
  -5  18  -4   69.64    8.09
  -5 -18  -5  107.05   10.47
  -5  18  -5  110.53   10.23
  -5  18  -6    8.72    4.26
  -5 -18  -6   14.99    5.57
  -5  18  -6   15.74    5.15
  -5  18  -7   95.79    9.91
  -5  18  -7   93.38    9.27
  -5 -18  -7   78.74    9.33
  -5  18  -8    8.11    4.48
  -5  18  -8   -0.02    4.02
  -5  18  -9   60.31    8.73
  -5  18 -10  128.53   12.41
  -5  18 -11  109.31   11.79
   5  19 -10    3.53    4.60
   5  19  -9  144.04   12.80
   5  19  -8   68.82    9.37
   5  19  -7  655.52   27.20
   5  19  -6  151.98   12.66
   5  19  -5   85.38    9.73
   5  19  -4   18.95    4.93
   5  19  -3  307.98   17.49
   5  19  -2  104.18   10.44
   5  19  -1   -5.11    4.15
  -5  19   1    0.96    3.34
  -5 -19   0   16.38    5.15
  -5  19   0   23.18    4.87
  -5  19  -1  176.49   12.05
  -5 -19  -1  166.69   13.23
  -5 -19  -2   18.17    5.85
  -5  19  -2   16.70    4.80
  -5  19  -3   56.90    7.39
  -5 -19  -3   60.03    8.31
  -5  19  -4  109.39    9.98
  -5 -19  -4  107.07   10.63
  -5 -19  -5  245.45   16.04
  -5  19  -5  271.61   16.07
  -5 -19  -6   13.89    5.11
  -5  19  -6    8.33    4.12
  -5  19  -7  168.36   13.30
  -5  19  -8   60.78    8.67
  -5  19  -9  143.51   12.86
  -5  19 -10    4.68    5.07
   5  20  -9  250.21   17.18
   5  20  -8    2.12    4.29
   5  20  -7   28.01    6.75
   5  20  -6  120.16   11.57
   5  20  -5   35.88    6.96
   5  20  -4   32.92    7.05
   5  20  -3  124.47   11.58
   5  20  -2   -1.20    4.62
   5  20  -1  613.62   25.98
  -5  20   1  603.05   23.43
  -5 -20   0    1.56    4.30
  -5  20   0    2.33    3.66
  -5  20  -1  229.27   14.08
  -5 -20  -1  220.46   15.67
  -5 -20  -2   30.60    6.48
  -5  20  -2   22.86    5.64
  -5 -20  -3  431.31   22.05
  -5  20  -3  488.85   21.54
  -5 -20  -4    1.45    4.11
  -5  20  -4    9.24    4.21
  -5 -20  -5   18.68    5.79
  -5  20  -5    8.84    4.29
  -5 -20  -6    4.24    4.72
  -5  20  -6   -2.28    4.09
  -5  20  -7   17.92    6.09
  -5  20  -8   -7.22    5.56
   5  21  -8   11.32    6.07
   5  21  -7  322.06   19.59
   5  21  -6   31.51    6.40
   5  21  -5  121.99   11.93
   5  21  -4   84.69   10.53
   5  21  -3  193.98   14.62
   5  21  -2   -4.64    4.22
  -5  21   1    2.20    3.51
   5  21  -1    0.62    4.02
  -5  21   0    3.50    4.01
  -5 -21   0    7.63    5.47
  -5  21  -1   -3.76    4.01
  -5 -21  -1   -2.35    4.50
  -5 -21  -2  114.27   11.44
  -5  21  -2  116.72   10.72
  -5 -21  -3   78.15    9.65
  -5  21  -3  108.85   10.30
  -5  21  -4   72.98    8.70
  -5 -21  -4   63.05    9.06
  -5 -21  -5  246.72   16.72
  -5  21  -5  253.49   16.11
  -5  21  -6    5.26    4.15
  -5  21  -7  243.32   16.57
   5  22  -6    9.78    5.62
   5  22  -5   39.09    7.96
   5  22  -4   59.76    8.73
   5  22  -3  217.16   16.05
   5  22  -2  145.70   13.47
  -5 -22   1  126.82   12.61
  -5  22   0  283.56   16.67
  -5 -22   0  275.54   18.43
  -5 -22  -1   68.95    9.86
  -5  22  -1   57.61    7.96
  -5 -22  -2  294.44   18.58
  -5  22  -2  289.51   17.23
  -5 -22  -3  131.94   12.79
  -5  22  -3  144.82   12.25
  -5 -22  -4   92.94   10.50
  -5  22  -4   98.17   10.32
  -5  22  -5   25.05    6.49
  -5  22  -6   20.75    5.92
  -5 -23   1   36.10    8.09
  -5 -23   0   -1.44    4.77
  -5 -23  -1    3.48    5.38
  -5 -23  -2   15.43    6.29
  -5 -23  -3   33.06    7.15
  -5  23  -3   38.59    7.45
  -5 -23  -4  199.69   15.70
  -5  23  -4  199.44   14.92
   6   0 -17   -9.26    5.86
   6   0 -16   92.26   10.46
   6   0 -15   -7.95    5.59
   6   0 -14  231.06   15.10
   6   0 -13    5.73    5.24
   6   0 -12 1319.09   38.62
   6   0 -11    0.94    3.39
   6   0 -10  261.82   14.18
  -6   0   9   -1.24    1.73
   6   0  -9    0.77    3.20
  -6   0   8  194.12    8.45
   6   0  -8  180.38   11.01
  -6   0   7   -1.97    1.88
   6   0  -7    0.82    3.20
  -6   0   6  103.48    6.10
   6   0  -6   96.74    7.72
   6   0  -5   -1.25    2.93
  -6   0   5    2.35    2.00
  -6   0   4  348.41   12.16
   6   0  -4  343.14   13.95
   6   0  -4  306.44    6.67
   6   0  -3   -0.52    3.11
  -6   0   3    1.14    2.36
  -6   0   2 1070.31   26.58
   6   0  -2 1042.79   27.76
  -6   0   1    5.93    3.26
   6   0  -1    3.53    3.28
  -6   0   0  524.46   10.89
  -6   0   0  560.92   17.62
   6   0   0  597.91   18.63
  -6   0  -1    2.38    3.05
  -6   0  -2 2295.92   50.08
  -6   0  -3    0.16    2.58
  -6   0  -4  278.87   13.33
  -6   0  -5    0.52    3.29
  -6   0  -6  719.62   24.26
  -6   0  -7   11.81    4.83
  -6   0  -8  111.75    9.70
  -6   0  -9   -0.01    3.58
  -6   0 -10  852.95   29.56
  -6   0 -11    0.31    3.48
  -6   0 -12  287.90   16.95
  -6   0 -13   -2.32    3.94
  -6   0 -14  996.83   35.95
  -6   0 -15   -8.36    5.50
   6   1 -17    6.16    4.72
   6  -1 -17   10.13    5.57
   6   1 -16    8.76    5.52
   6  -1 -16    1.65    4.77
   6   1 -15   52.89    8.08
   6  -1 -15   64.54    8.60
   6   1 -14   79.94    9.48
   6  -1 -14   64.46    8.50
   6   1 -13   40.48    6.80
   6  -1 -13   37.45    6.48
   6   1 -12  248.25   14.88
   6  -1 -12  262.11   14.94
   6   1 -11    5.24    3.55
   6  -1 -11    1.49    3.72
  -6  -1  10   43.29    4.29
   6   1 -10   55.71    6.92
   6  -1 -10   49.90    6.65
  -6  -1   9   21.06    3.27
   6   1  -9   28.07    5.36
   6  -1  -9   15.98    4.45
  -6   1   9   18.97    2.52
  -6   1   8  222.55    8.72
   6   1  -8  201.81   11.94
   6  -1  -8  239.78   12.57
  -6  -1   8  252.27   10.15
  -6  -1   7  278.96   10.87
  -6   1   7  265.42    9.72
   6   1  -7  247.00   12.81
   6  -1  -7  246.67   12.59
  -6  -1   6  662.92   18.52
   6   1  -6  640.90   21.21
  -6   1   6  655.10   17.52
   6  -1  -6  648.45   21.17
  -6  -1   5   36.87    4.05
   6   1  -5   24.15    4.52
   6  -1  -5   26.75    4.35
  -6   1   5   30.39    3.52
  -6  -1   4  996.74   25.30
   6  -1  -4  938.69   26.88
   6   1  -4 1032.44   19.55
   6   1  -4 1044.78   27.77
  -6   1   4  999.81   24.51
  -6  -1   3  988.26   25.42
  -6   1   3  987.27   24.72
   6   1  -3 1006.91   27.19
   6  -1  -3 1039.66   27.42
  -6  -1   2  124.32    7.68
   6   1  -2  103.60    7.57
  -6   1   2  108.37    6.96
   6  -1  -2  121.62    8.08
  -6   1   1   34.10    4.24
   6   1  -1   31.32    4.80
   6  -1  -1   22.74    4.30
  -6  -1   1   30.77    4.44
  -6  -1   0    4.71    3.16
  -6  -1   0    2.62    0.87
  -6   1   0    5.35    2.89
   6   1   0   -0.64    2.96
   6  -1   0    5.10    3.34
  -6  -1  -1    0.13    3.10
  -6   1  -1    1.21    2.77
   6   1   1    0.71    3.05
  -6   1  -2  254.67   11.97
  -6  -1  -2  274.60   12.55
  -6   1  -3   60.54    6.50
  -6  -1  -3   58.51    6.29
  -6  -1  -4 1393.78   36.22
  -6   1  -4 1496.44   37.04
  -6  -1  -5   67.32    6.88
  -6   1  -5   67.23    7.08
  -6  -1  -6  244.04   13.17
  -6   1  -6  259.40   13.64
  -6  -1  -7  133.41    9.86
  -6   1  -7  110.94    9.36
  -6   1  -8 2110.00   51.49
  -6  -1  -8 2049.24   50.67
  -6   1  -9  559.62   22.55
  -6  -1  -9  550.63   22.20
  -6  -1 -10   82.55    8.92
  -6   1 -10   78.45    8.85
  -6  -1 -11  190.27   13.13
  -6   1 -11  173.19   12.88
  -6  -1 -12   94.97    9.67
  -6  -1 -12   98.54    9.98
  -6   1 -12   78.87    9.50
  -6  -1 -13    2.54    3.97
  -6   1 -13    8.68    5.42
  -6   1 -14   26.74    6.38
  -6  -1 -14   40.31    7.77
  -6   1 -15    7.72    4.53
  -6  -1 -15   -0.57    4.61
   6   2 -17   29.96    7.43
   6  -2 -17   25.28    5.94
   6   2 -16   45.71    8.37
   6  -2 -16   35.87    7.15
   6   2 -15  186.00   14.22
   6  -2 -15  173.88   13.21
   6   2 -14  132.92   11.77
   6  -2 -14  124.92   10.76
   6   2 -13  707.22   27.21
   6  -2 -13  683.79   26.10
   6  -2 -12  113.31    9.64
   6   2 -12   95.71    9.52
   6   2 -11   63.62    7.49
   6  -2 -11   73.65    7.81
   6   2 -10   -2.34    4.02
   6  -2 -10    1.00    2.99
   6   2  -9 1114.66   32.40
   6  -2  -9 1060.75   31.25
  -6  -2   9 1117.03   27.47
  -6  -2   8   33.99    4.02
   6   2  -8   32.18    5.47
   6  -2  -8   29.59    4.94
  -6   2   8   24.82    2.83
   6   2  -7   33.62    5.53
  -6  -2   7   28.10    3.90
   6  -2  -7   32.30    4.90
  -6   2   7   24.68    2.99
  -6  -2   6  543.79   16.90
   6   2  -6  540.45   19.34
   6  -2  -6  546.84   19.02
  -6   2   6  549.10   15.00
  -6   2   5    4.17    2.12
  -6  -2   5    0.77    2.30
   6   2  -5    0.17    2.68
   6  -2  -5    4.94    3.45
  -6   2   4   56.61    4.45
   6   2  -4   58.35    3.12
  -6  -2   4   57.64    5.16
   6   2  -4   55.62    5.94
   6  -2  -4   62.15    6.04
  -6  -2   3  293.37   12.12
   6   2  -3  322.37   13.60
   6  -2  -3  308.84   13.02
  -6   2   3  314.23   11.37
   6   2  -3  313.02    7.81
  -6  -2   2  534.92   17.27
   6  -2  -2  512.34   17.60
   6   2  -2  519.11   17.78
  -6   2   2  535.66   16.19
  -6  -2   1 2735.38   57.16
   6   2  -1 2831.21   57.69
   6  -2  -1 2733.50   57.50
  -6   2   1 2753.35   55.64
  -6   2   0  165.07    8.73
  -6  -2   0  143.40    8.69
   6   2   0  140.72    8.59
   6  -2   0  162.82    9.22
  -6   2  -1  452.28   15.86
  -6  -2  -1  452.55   16.32
   6   2   1  427.74   15.84
  -6   2  -2 1054.81   28.50
  -6  -2  -2 1087.00   29.03
  -6   2  -3 1554.60   37.94
  -6  -2  -3 1550.37   38.01
  -6   2  -4  482.87   18.10
  -6  -2  -4  488.95   18.33
  -6  -2  -5  105.82    8.44
  -6   2  -5   94.05    8.02
  -6  -2  -6    7.36    3.99
  -6   2  -6   10.38    4.01
  -6   2  -7    3.52    3.71
  -6  -2  -7    6.16    4.17
  -6   2  -8   82.04    8.46
  -6  -2  -8   69.54    7.59
  -6  -2  -9   42.78    6.63
  -6   2  -9   61.82    7.89
  -6   2 -10  163.16   12.12
  -6  -2 -10  178.71   12.29
  -6  -2 -11  444.94   20.67
  -6  -2 -12   35.31    6.46
  -6  -2 -12   39.57    6.61
  -6   2 -12   23.85    6.09
  -6  -2 -13  470.71   22.36
  -6  -2 -13  455.18   22.04
  -6   2 -13  473.09   23.22
  -6   2 -14  229.45   16.52
  -6  -2 -14  235.42   16.08
  -6   2 -15  105.45   11.88
  -6  -2 -15  117.04   11.83
   6   3 -17  186.93   15.49
   6  -3 -17  197.00   15.01
   6   3 -16   22.38    6.28
   6  -3 -16   -1.23    4.13
   6   3 -15  163.98   13.58
   6  -3 -15  143.69   12.22
   6   3 -14   -1.31    4.43
   6  -3 -14    3.61    4.06
   6   3 -13   23.95    6.52
   6  -3 -13   18.69    5.18
   6  -3 -12  110.53    9.73
   6   3 -12   89.20    9.45
   6   3 -11    8.94    4.45
   6  -3 -11    9.36    4.03
   6   3 -10    6.95    4.06
   6  -3 -10    1.30    3.12
   6  -3  -9   81.62    7.69
   6   3  -9   95.34    8.75
   6   3  -8  321.40   15.12
   6  -3  -8  325.65   14.65
  -6   3   8  309.18    9.19
   6   3  -7 1323.97   34.90
   6  -3  -7 1286.83   33.83
  -6   3   7 1291.68   26.94
  -6  -3   7 1295.29   31.31
   6   3  -6   34.68    5.43
  -6  -3   6   26.33    4.06
  -6   3   6   20.77    2.59
   6  -3  -6   17.45    3.92
  -6  -3   5  382.21   14.03
   6   3  -5  392.63   15.60
   6  -3  -5  404.13   15.31
   6  -3  -5  329.32    8.18
  -6   3   5  399.08   11.84
   6   3  -4   30.85    2.65
   6   3  -4   30.87    4.91
  -6   3   4   32.66    3.42
  -6  -3   4   27.03    4.14
   6  -3  -4   34.31    4.72
  -6  -3   3 3583.02   71.07
   6   3  -3 3624.71   64.40
   6  -3  -3 3632.60   72.17
   6   3  -3 3732.75   73.04
  -6   3   3 3600.32   68.58
  -6  -3   2   20.55    3.78
   6   3  -2   18.87    4.10
   6  -3  -2   21.84    3.91
  -6   3   2   16.59    2.87
  -6   3   1   15.19    3.24
  -6  -3   1   17.77    3.64
   6   3  -1   12.33    3.21
   6  -3  -1   13.86    3.91
  -6   3   0  262.79   11.23
  -6  -3   0  255.40   11.86
   6   3   0  254.02   11.67
  -6   3  -1    1.33    2.77
   6   3   1    4.23    2.60
  -6  -3  -1    0.88    3.32
  -6  -3  -2  136.50    8.99
  -6   3  -2  112.07    7.83
  -6   3  -3  340.23   14.32
  -6  -3  -3  330.54   14.50
  -6  -3  -4  770.51   24.26
  -6   3  -4  780.75   24.20
  -6  -3  -5 1086.91   30.42
  -6   3  -5 1011.45   29.90
  -6  -3  -6  503.60   19.56
  -6   3  -6  516.12   19.88
  -6  -3  -7  896.72   28.14
  -6   3  -7  836.81   27.69
  -6   3  -8   -5.27    4.54
  -6  -3  -8   -3.14    4.27
  -6   3  -9  695.35   26.03
  -6  -3  -9  699.67   25.49
  -6  -3 -10   33.08    5.91
  -6  -3 -11  100.45    9.76
  -6  -3 -12   13.86    4.66
  -6  -3 -12   14.58    4.72
  -6   3 -12   17.17    5.57
  -6  -3 -13   17.93    5.37
  -6   3 -13   18.97    6.28
  -6  -3 -13   11.68    5.24
  -6   3 -14   52.79    8.74
  -6  -3 -14   57.48    8.40
  -6  -3 -15  138.04   12.80
  -6   3 -15  137.48   13.30
  -6  -3 -16    1.23    5.07
   6  -4 -18   41.90    7.65
   6   4 -17  239.66   17.67
   6  -4 -17  226.23   15.81
   6   4 -16   83.51   10.46
   6  -4 -16   74.46    9.10
   6   4 -15   66.99    9.30
   6  -4 -15   64.62    8.42
   6   4 -14    5.63    5.16
   6  -4 -14    2.02    4.00
   6   4 -13  796.91   29.78
   6  -4 -13  793.54   28.14
   6   4 -12  181.16   13.10
   6  -4 -12  188.51   12.32
   6   4 -11  305.11   16.48
   6  -4 -11  296.46   15.13
   6   4 -10   10.68    4.11
   6  -4 -10    9.32    3.82
   6   4  -9  724.40   24.92
   6  -4  -9  665.83   22.93
   6   4  -8  255.52   13.60
   6  -4  -8  232.54   12.29
  -6   4   7   59.45    3.53
   6  -4  -7   53.01    6.03
   6   4  -7   69.66    7.19
  -6   4   6  305.57    9.71
   6  -4  -6  324.62   13.97
   6   4  -6  319.80   14.43
  -6  -4   6  350.18   13.61
   6  -4  -5  178.64    9.90
  -6   4   5  177.34    7.33
   6   4  -5  156.12    9.85
   6   4  -5  193.68    7.58
  -6  -4   5  179.09    9.49
  -6  -4   4  258.72   11.47
   6  -4  -4  259.43   11.82
  -6   4   4  263.79    9.54
   6   4  -4  253.76   12.21
   6   4  -4  242.04    8.49
  -6  -4   3  464.78   16.09
  -6   4   3  464.49   14.12
   6   4  -3  443.64   16.41
   6  -4  -3  450.64   16.26
   6   4  -3  438.06   11.88
  -6  -4   2  148.61    8.71
  -6   4   2  156.08    7.94
   6   4  -2  162.12    9.26
   6  -4  -2  147.17    8.82
   6   4  -2  155.99    6.01
  -6  -4   1  483.04   16.79
  -6   4   1  456.13   15.18
   6   4  -1  472.36   16.48
   6  -4  -1  440.38   16.18
  -6  -4   0  389.69   15.43
   6   4   0  400.37   14.98
  -6   4   0  380.96   14.16
  -6   4   0  417.30    8.81
  -6  -4  -1  752.81   22.88
  -6   4  -1  749.28   21.74
   6   4   1  687.31   21.27
  -6  -4  -2  414.29   16.34
  -6   4  -2  421.41   15.88
  -6  -4  -3 1817.49   42.65
  -6   4  -3 1731.23   41.71
  -6  -4  -4   58.97    6.64
  -6   4  -4   72.45    7.04
  -6  -4  -5   16.84    4.57
  -6   4  -5   18.71    4.75
  -6  -4  -6   29.18    5.24
  -6   4  -6   33.27    5.69
  -6  -4  -7   31.11    6.08
  -6   4  -7   49.95    7.01
  -6   4  -8   16.41    5.25
  -6  -4  -8   10.49    4.39
  -6  -4  -9  595.21   23.31
  -6  -4 -10   45.73    6.78
  -6  -4 -11  136.28   11.27
  -6   4 -12    5.33    4.04
  -6  -4 -12   13.01    4.86
  -6  -4 -12   12.87    4.92
  -6   4 -13  536.11   25.51
  -6  -4 -13  577.67   24.85
  -6  -4 -13  554.65   23.90
  -6  -4 -14  150.23   12.64
  -6   4 -14  111.30   11.93
  -6  -4 -14  107.94   11.08
  -6   4 -15  325.32   20.90
  -6  -4 -15  344.23   19.62
   6  -5 -17    7.45    4.84
   6   5 -16   36.49    7.57
   6  -5 -16   18.19    5.58
   6   5 -15   -2.08    4.04
   6  -5 -15   -2.61    3.58
   6   5 -14  144.04   12.73
   6  -5 -14  154.13   11.89
   6   5 -13   62.67    8.79
   6  -5 -13   76.21    8.36
   6   5 -12   58.16    8.07
   6  -5 -12   52.93    6.87
   6   5 -11  242.75   14.70
   6  -5 -11  247.96   13.68
   6   5 -10  223.78   13.63
   6  -5 -10  211.95   12.37
   6   5  -9  239.63   13.64
   6  -5  -9  225.98   12.38
   6   5  -8  472.50   19.09
   6  -5  -8  458.29   17.77
   6   5  -7  639.28   22.56
   6  -5  -7  686.66   21.86
   6   5  -6 1097.69   30.25
   6  -5  -6 1034.11   28.36
  -6   5   6 1039.00   22.18
   6   5  -5  539.19   19.43
   6   5  -5  568.19   15.62
   6  -5  -5  559.62   18.83
  -6   5   5  563.97   14.71
  -6  -5   5  565.86   18.81
   6   5  -4  577.09   19.51
   6   5  -4  561.76   15.05
   6  -5  -4  548.53   18.36
  -6   5   4  543.02   15.13
  -6  -5   4  569.05   18.81
  -6  -5   3  611.20   19.52
   6   5  -3  580.12   19.35
   6   5  -3  610.46   15.46
   6  -5  -3  561.96   18.78
  -6   5   3  587.38   16.55
  -6  -5   2  128.62    8.45
   6  -5  -2  111.94    7.84
   6   5  -2  128.49    5.85
   6   5  -2  125.37    8.33
  -6   5   2  117.23    6.88
  -6  -5   1   56.54    5.69
   6   5  -1   59.33    5.81
  -6   5   1   65.25    5.37
   6  -5  -1   67.39    6.07
  -6   5   0   12.30    1.38
  -6  -5   0    9.11    3.61
  -6   5   0    5.85    2.86
   6   5   0   12.81    3.43
  -6  -5  -1    4.29    3.82
  -6   5  -1    2.55    3.01
   6   5   1    4.28    2.87
  -6  -5  -2   16.74    4.03
  -6   5  -2   24.34    4.60
  -6   5  -3 1138.21   30.82
  -6  -5  -3 1139.76   31.38
  -6   5  -4  218.41   11.74
  -6  -5  -4  191.76   11.52
  -6   5  -5  331.98   15.49
  -6  -5  -5  350.75   15.64
  -6  -5  -6  165.29   11.03
  -6   5  -6  184.75   11.70
  -6  -5  -7 1010.08   30.85
  -6  -5  -8  895.86   29.12
  -6  -5  -9  428.19   19.40
  -6  -5 -10   82.47    8.57
  -6   5 -11   -1.28    4.01
  -6  -5 -11    2.49    3.42
  -6  -5 -12   95.19    9.37
  -6   5 -12   75.96    9.64
  -6  -5 -12   86.92    9.41
  -6  -5 -13   75.51    9.23
  -6   5 -13   80.55   10.26
  -6  -5 -13   66.99    8.40
  -6   5 -14   10.39    5.54
  -6  -5 -14    7.33    4.21
  -6  -5 -14    7.74    4.86
   6   6 -16   73.91   10.03
   6  -6 -16   76.97    9.21
   6   6 -15   -4.10    5.64
   6  -6 -15    1.63    3.70
   6   6 -14  388.77   20.91
   6  -6 -14  400.25   19.22
   6   6 -13  213.80   14.70
   6  -6 -13  197.27   12.96
   6   6 -12  654.25   26.21
   6  -6 -12  646.49   23.85
   6   6 -11   35.57    6.49
   6  -6 -11   42.89    6.04
   6   6 -10  609.72   23.57
   6  -6 -10  570.36   21.12
   6   6  -9    0.51    3.74
   6  -6  -9    1.73    2.89
   6   6  -8  435.02   18.50
   6  -6  -8  438.30   17.08
   6   6  -7   81.63    7.84
   6  -6  -7   65.43    6.40
   6   6  -6  164.26   10.52
   6  -6  -6  180.46   10.00
   6   6  -5   21.84    4.64
   6   6  -5   29.99    3.54
  -6   6   5   25.79    2.65
   6  -6  -5   29.26    4.35
  -6  -6   5   26.13    4.40
  -6  -6   4    5.03    3.42
  -6   6   4    2.98    1.64
   6   6  -4    3.64    3.10
   6   6  -4    2.71    2.08
   6  -6  -4    4.04    2.88
  -6   6   3  154.42    7.42
   6   6  -3  159.88    9.42
   6   6  -3  150.87    7.00
   6  -6  -3  161.00    9.19
  -6  -6   3  146.70    9.24
  -6  -6   2 1435.62   35.40
  -6   6   2 1388.88   31.86
   6   6  -2 1422.23   34.75
   6  -6  -2 1412.12   34.49
   6   6  -2 1427.74   30.47
  -6   6   1   39.95    4.48
  -6   6   1   48.20    2.66
  -6  -6   1   57.36    6.28
   6   6  -1   62.07    5.94
  -6  -6   0  648.20   21.10
  -6   6   0  627.67   19.24
  -6   6   0  655.41   14.29
   6   6   0  587.66   19.37
  -6  -6  -1  868.30   26.06
  -6   6  -1  858.36   24.54
   6   6   1  918.00   24.92
  -6  -6  -2 1014.56   29.04
  -6   6  -2  995.48   27.63
  -6  -6  -3  151.62    9.98
  -6   6  -3  153.51    9.71
  -6  -6  -4  115.29    9.02
  -6   6  -4  127.95    9.35
  -6  -6  -5   36.89    5.67
  -6  -6  -6   55.76    6.93
  -6  -6  -7  100.28    8.95
  -6  -6  -8   78.95    8.21
  -6  -6  -9  262.21   14.91
  -6  -6 -10  233.40   14.36
  -6  -6 -11   10.21    4.25
  -6   6 -11   -1.51    3.62
  -6  -6 -12  193.08   12.74
  -6   6 -12  183.51   14.36
  -6  -6 -12  181.10   13.28
  -6  -6 -13  130.62   11.43
  -6   6 -13  143.08   13.42
  -6  -6 -13  132.20   11.08
  -6  -6 -14  548.02   24.67
  -6   6 -14  517.79   26.30
   6   7 -16  229.29   17.06
   6   7 -15   43.97    8.42
   6   7 -14  173.21   14.15
   6  -7 -14  172.60   12.40
   6   7 -13   -2.08    4.45
   6  -7 -13   -2.44    3.54
   6   7 -12  222.38   14.91
   6  -7 -12  253.65   14.07
   6   7 -11   12.53    5.02
   6  -7 -11   12.28    4.00
   6   7 -10   18.75    5.01
   6  -7 -10   12.85    3.91
   6   7  -9  167.57   11.71
   6  -7  -9  163.79   10.18
   6   7  -8 1580.06   41.69
   6  -7  -8 1601.44   39.29
   6   7  -7  155.93   10.66
   6  -7  -7  166.85    9.84
   6   7  -6  438.26   17.52
   6   7  -6  411.28   14.56
   6  -7  -6  422.46   15.97
   6   7  -5   -0.61    2.75
   6   7  -5    2.77    2.36
   6  -7  -5   -3.06    2.84
   6   7  -4  599.10   20.06
   6   7  -4  575.85   16.69
   6  -7  -4  574.40   18.89
  -6  -7   4  563.25   19.81
  -6  -7   3    9.96    3.71
   6   7  -3    2.55    1.91
   6   7  -3    8.78    3.39
   6  -7  -3    6.64    3.17
  -6  -7   2 1005.18   28.32
   6   7  -2 1016.00   24.21
   6   7  -2  947.93   26.74
   6  -7  -2 1022.45   27.14
  -6   7   2  987.84   24.75
  -6  -7   1   26.91    4.91
  -6   7   1   29.60    2.47
  -6   7   1   28.03    3.88
   6   7  -1   24.64    4.27
  -6  -7   0  123.75    8.76
  -6   7   0  110.66    4.91
   6   7   0  119.42    7.81
  -6   7   0  102.46    7.12
  -6   7  -1   18.53    3.98
  -6  -7  -1   14.25    4.33
  -6   7  -1   19.31    2.41
   6   7   1   10.32    2.82
  -6  -7  -2    2.40    3.43
  -6  -7  -3    3.37    2.96
  -6  -7  -4 1079.91   31.25
  -6  -7  -5   33.47    5.60
  -6  -7  -6  393.39   17.54
  -6  -7  -7    4.76    4.05
  -6  -7  -8  327.00   16.58
  -6  -7  -9   13.92    4.40
  -6  -7 -10  151.98   11.63
  -6  -7 -11   11.61    4.54
  -6  -7 -11   18.80    4.77
  -6   7 -11   22.00    5.87
  -6  -7 -12   23.42    5.73
  -6  -7 -12   18.95    4.93
  -6   7 -12   12.23    4.98
  -6   7 -13    7.98    5.86
  -6  -7 -13   12.50    4.89
  -6   7 -14   94.72   11.31
   6   8 -16   71.66   10.55
   6   8 -15    3.47    4.90
   6   8 -14  519.14   24.79
   6   8 -13  202.04   14.83
   6  -8 -13  196.25   12.62
   6   8 -12  180.79   13.57
   6  -8 -12  187.06   11.91
   6   8 -11  317.45   17.51
   6  -8 -11  319.28   15.30
   6   8 -10  476.95   20.91
   6  -8 -10  448.40   18.07
   6   8  -9   93.80    8.83
   6  -8  -9   82.94    7.31
   6   8  -8  313.98   15.73
   6  -8  -8  321.28   14.06
   6   8  -7    1.40    3.02
   6  -8  -7   -0.19    2.67
   6   8  -6  256.42   13.23
   6   8  -6  240.48   10.92
   6  -8  -6  247.43   11.77
   6   8  -5    8.72    3.82
   6   8  -5    7.36    2.78
   6  -8  -5    7.32    3.32
   6   8  -4   84.78    6.12
   6   8  -4   67.24    6.60
   6  -8  -4   74.94    6.36
   6   8  -3  171.40   10.00
   6   8  -3  164.76    8.31
   6  -8  -3  170.70    9.40
  -6  -8   3  172.89   10.51
   6   8  -2 1841.61   39.80
   6   8  -2 1826.02   42.59
  -6  -8   2 1920.19   44.90
  -6  -8   1  314.67   14.52
   6   8  -1  320.73   12.16
   6   8  -1  353.81   13.94
  -6   8   1  357.31   10.16
  -6  -8   0  424.69   17.22
  -6   8   0  448.96   12.20
   6   8   0  442.03   15.88
  -6  -8  -1 1049.60   30.01
  -6   8  -1 1055.25   23.70
   6   8   1 1017.43   27.28
  -6  -8  -2  608.89   21.51
  -6  -8  -3  825.40   26.46
  -6  -8  -4  309.86   15.20
  -6  -8  -5   -1.49    3.68
  -6  -8  -6   20.42    5.17
  -6  -8  -7   22.51    5.12
  -6  -8  -8   15.37    4.70
  -6  -8  -9  110.54    9.67
  -6  -8 -10   89.43    9.30
  -6   8 -11    4.62    3.97
  -6  -8 -11    9.55    4.90
  -6   8 -12  157.80   13.55
  -6  -8 -12  168.18   12.67
  -6   8 -13  128.01   12.97
  -6  -8 -13  121.74   11.16
  -6   8 -14  263.37   18.81
   6   9 -15  195.95   15.80
   6   9 -14   25.13    6.29
   6   9 -13  145.74   12.90
   6   9 -12  119.02   11.25
   6   9 -11  460.20   21.50
   6  -9 -11  468.87   18.69
   6   9 -10    6.59    4.86
   6  -9 -10    3.36    3.01
   6   9  -9  294.63   15.87
   6  -9  -9  320.53   14.37
   6   9  -8  561.39   21.84
   6  -9  -8  545.43   19.16
   6   9  -7  774.62   25.90
   6   9  -7  738.99   23.08
   6  -9  -7  806.80   23.69
   6   9  -6  159.31   10.55
   6   9  -6  162.80    9.17
   6  -9  -6  163.03    9.56
   6   9  -5  806.24   25.74
   6   9  -5  931.65   24.56
   6  -9  -5  841.40   24.33
   6   9  -4  262.26   12.90
   6  -9  -4  247.99   11.68
   6   9  -4  261.83   11.35
   6   9  -3  221.38   10.08
   6   9  -3  177.82   10.36
  -6  -9   3  192.85   11.49
  -6  -9   2    4.63    3.49
   6   9  -2    4.23    2.92
   6   9  -2    6.69    3.11
  -6  -9   1   32.66    5.64
   6   9  -1   32.41    4.19
   6   9  -1   29.68    4.29
  -6   9   1   25.93    2.75
  -6  -9   0   56.69    6.63
  -6   9   0   57.54    4.09
   6   9   0   47.84    5.00
  -6  -9  -1   10.42    4.55
  -6   9  -1    8.34    2.40
   6   9   1   11.46    3.54
  -6  -9  -2   47.16    6.48
  -6  -9  -3  708.08   24.42
  -6  -9  -4  352.34   16.70
  -6  -9  -5  133.25   10.08
  -6  -9  -6   51.20    6.69
  -6  -9  -7  599.43   23.20
  -6  -9  -8  405.49   18.87
  -6  -9  -9  400.72   19.06
  -6  -9 -10   46.66    6.93
  -6   9 -10   37.51    6.84
  -6  -9 -11   -1.51    3.70
  -6   9 -11    3.12    4.03
  -6  -9 -12   -3.57    4.47
  -6   9 -12    2.36    4.17
  -6   9 -13   83.50   11.19
   6  10 -15   11.47    5.86
   6  10 -14   17.47    6.33
   6  10 -13  726.48   29.60
   6  10 -12    0.59    3.92
   6  10 -11  399.19   19.83
   6  10 -10   71.29    8.60
   6 -10 -10   54.03    5.97
   6  10  -9  381.73   18.30
   6 -10  -9  362.38   15.18
   6  10  -8    5.31    4.20
   6 -10  -8    4.47    2.95
   6  10  -7  217.35   12.92
   6  10  -7  209.78   11.54
   6 -10  -7  214.38   11.03
   6  10  -6   19.44    4.34
   6  10  -6   28.96    4.69
   6 -10  -6   27.12    4.17
   6  10  -5   71.40    6.98
   6  10  -5   64.32    5.92
   6 -10  -5   64.18    5.98
   6  10  -4   36.56    5.18
   6  10  -4   40.05    4.72
   6  10  -3  290.73   13.38
   6  10  -3  315.73   13.00
  -6 -10   3  307.96   15.11
  -6 -10   2   73.87    7.56
   6  10  -2   63.59    5.75
   6  10  -2   67.40    6.32
  -6  10   1  395.29   12.16
   6  10  -1  372.24   14.37
   6  10  -1  390.87   14.94
  -6 -10   1  367.91   16.66
  -6 -10   0   26.86    5.28
  -6  10   0   21.34    2.82
   6  10   0   21.83    4.10
  -6 -10  -1  743.74   24.72
  -6  10  -1  668.47   18.73
   6  10   1  743.14   21.53
  -6 -10  -2   44.54    6.24
  -6  10  -2   50.03    4.58
  -6 -10  -3  752.06   25.70
  -6 -10  -4  195.23   12.35
  -6 -10  -5  133.24   10.72
  -6 -10  -6   -2.00    3.84
  -6 -10  -7  166.12   11.86
  -6 -10  -8   13.32    4.29
  -6 -10  -9  442.39   20.20
  -6 -10 -10    5.14    3.70
  -6  10 -10   18.76    5.66
  -6 -10 -11   24.18    5.29
  -6  10 -11   30.66    6.60
  -6  10 -12   25.84    6.70
  -6 -10 -12   31.14    6.35
  -6  10 -13  350.96   21.42
   6  11 -15  238.80   17.50
   6  11 -14    5.24    5.20
   6  11 -13    7.68    5.28
   6  11 -12    4.99    5.27
   6  11 -11  164.17   12.82
   6  11 -10   -1.57    4.41
   6  11  -9  250.75   14.94
   6  11  -8  586.98   23.04
   6  11  -8  645.05   22.07
   6 -11  -8  568.54   19.46
   6  11  -7 1302.15   36.26
   6  11  -7 1199.46   33.46
   6 -11  -7 1273.17   32.16
   6  11  -6  193.13   11.77
   6  11  -6  203.73   11.09
   6 -11  -6  198.13   10.35
   6  11  -5  522.67   19.87
   6  11  -5  518.71   18.60
   6 -11  -5  570.55   18.46
   6  11  -4  428.55   17.14
   6  11  -4  445.15   16.51
   6  11  -3  840.84   25.32
   6  11  -3  865.80   24.79
   6  11  -2  374.61   14.78
   6  11  -2  360.77   14.73
  -6 -11   2  346.99   16.39
  -6 -11   1   31.71    5.43
   6  11  -1   31.42    4.56
  -6  11   1   30.73    3.64
   6  11  -1   44.27    5.23
  -6 -11   0  115.92    9.60
  -6  11   0  115.00    6.48
   6  11   0  110.53    7.62
  -6 -11  -1   22.67    5.33
  -6  11  -1   17.82    3.21
   6  11   1   18.03    3.58
  -6 -11  -2    7.06    3.84
  -6  11  -2   14.23    3.22
  -6 -11  -3  427.48   18.70
  -6 -11  -4  159.60   11.52
  -6 -11  -5  272.52   15.18
  -6 -11  -6  424.79   19.16
  -6 -11  -7  647.30   24.70
  -6 -11  -8   92.56    9.19
  -6  11  -9  394.72   20.44
  -6 -11  -9  433.36   20.06
  -6 -11 -10  231.58   14.81
  -6  11 -10  246.47   16.35
  -6 -11 -11    0.22    3.59
  -6  11 -11   -0.20    4.77
  -6  11 -12   17.37    5.59
  -6  11 -13   13.96    6.12
   6  12 -14  251.95   17.64
   6  12 -13  300.64   18.83
   6  12 -12  155.64   13.13
   6  12 -11   -2.37    4.59
   6  12 -10  294.09   16.68
   6  12  -9  324.60   16.95
   6  12  -9  293.86   15.36
   6  12  -8  280.69   15.33
   6  12  -8  261.85   14.12
   6  12  -7   30.63    5.55
   6  12  -7   34.66    5.60
   6  12  -6   57.41    6.82
   6  12  -6   42.32    5.77
   6 -12  -6   54.82    5.36
   6  12  -5   10.78    3.96
   6  12  -5   14.90    4.15
   6  12  -4    3.38    3.19
   6  12  -4    7.61    3.61
   6  12  -3  193.49   10.85
   6  12  -3  177.23   10.51
   6  12  -2  655.47   21.25
   6  12  -2  677.85   21.77
  -6 -12   2  655.73   24.20
   6  12  -1  924.32   27.21
  -6  12   1  999.62   24.65
   6  12  -1  947.53   26.26
  -6 -12   1  915.14   29.92
  -6 -12   0  249.57   14.24
  -6  12   0  250.36   10.59
   6  12   0  283.22   12.32
  -6 -12  -1  160.05   11.57
  -6  12  -1  190.01    9.30
   6  12   1  190.33    9.73
  -6 -12  -2  556.14   22.16
  -6  12  -2  586.69   18.44
  -6 -12  -3  429.05   19.31
  -6  12  -3  464.63   16.49
  -6 -12  -4  509.10   21.33
  -6 -12  -5   -3.35    4.21
  -6 -12  -6    3.23    3.47
  -6 -12  -7    0.48    3.86
  -6 -12  -8    4.56    3.92
  -6 -12  -9   51.66    7.36
  -6  12  -9   59.20    8.27
  -6  12 -10  129.17   12.40
  -6 -12 -10  136.31   11.51
  -6 -12 -11  104.09   10.30
  -6  12 -11  109.76   11.63
  -6  12 -12  215.67   16.46
   6  13 -14  109.09   11.98
   6  13 -13   28.64    7.29
   6  13 -12   65.96    9.20
   6  13 -11    1.22    4.07
   6  13 -10   71.62    8.81
   6  13 -10   61.38    7.45
   6  13  -9   74.29    8.51
   6  13  -9   75.49    8.07
   6  13  -8  577.61   23.08
   6  13  -8  542.76   21.58
   6  13  -7   85.24    8.51
   6  13  -7   80.35    8.12
   6  13  -6  620.68   22.86
   6  13  -6  632.37   22.50
   6  13  -5  292.45   14.39
   6  13  -5  301.39   14.43
   6  13  -4 1264.18   34.15
   6  13  -4 1261.68   34.04
   6  13  -3   55.06    6.30
   6  13  -3   66.52    6.65
   6  13  -2  349.58   15.47
   6  13  -2  371.55   15.09
  -6 -13   2  358.31   17.56
   6  13  -1  122.96    8.92
  -6  13   1  137.50    7.92
   6  13  -1  122.98    8.24
  -6 -13   1  121.46   10.38
  -6  13   0  116.60    7.38
   6  13   0  126.28    8.07
  -6 -13   0  108.60    9.70
  -6 -13  -1    3.95    4.01
  -6  13  -1    2.13    2.21
   6  13   1    2.66    2.35
  -6 -13  -2  111.93    9.73
  -6  13  -2  109.85    7.70
  -6 -13  -3   17.78    5.35
  -6  13  -3   21.54    3.91
  -6 -13  -4  656.04   25.14
  -6  13  -4  661.79   21.82
  -6 -13  -5   26.23    5.29
  -6 -13  -6  121.86   10.47
  -6 -13  -7   12.84    4.37
  -6  13  -8  573.35   24.92
  -6 -13  -8  642.72   25.42
  -6 -13  -9   -1.67    4.10
  -6  13  -9    2.06    3.93
  -6  13 -10  125.13   12.15
  -6 -13 -10  135.69   11.54
  -6  13 -11   18.72    5.61
  -6  13 -12   33.05    7.73
   6  14 -14  289.01   19.11
   6  14 -13   55.67    9.11
   6  14 -12  951.03   34.96
   6  14 -11   99.29   10.39
   6  14 -11   91.60    9.47
   6  14 -10  216.48   14.63
   6  14 -10  227.12   14.47
   6  14  -9   18.06    5.31
   6  14  -9    5.46    4.60
   6  14  -8  183.00   12.68
   6  14  -8  182.47   12.32
   6  14  -7   12.40    4.75
   6  14  -7   10.25    4.52
   6  14  -6   32.06    5.64
   6  14  -6   33.16    5.70
   6  14  -5   78.13    7.94
   6  14  -5   84.53    7.80
   6  14  -4  255.24   13.18
   6  14  -4  259.69   13.73
   6  14  -3   91.57    7.56
   6  14  -3   89.03    8.05
   6  14  -2  835.21   26.56
   6  14  -2  847.48   24.99
  -6 -14   2  804.19   28.69
  -6 -14   1   74.63    8.44
  -6  14   1   95.28    6.85
   6  14  -1   95.36    8.36
   6  14  -1   95.33    7.16
  -6  14   0  559.67   18.37
   6  14   0  533.98   17.89
  -6 -14   0  525.90   22.26
  -6 -14  -1  170.92   12.37
  -6  14  -1  195.33   10.26
  -6 -14  -2  885.51   30.35
  -6  14  -2  953.56   26.63
  -6 -14  -3   15.88    5.07
  -6  14  -3    5.62    3.06
  -6  14  -4    5.38    3.02
  -6 -14  -4   11.85    4.72
  -6 -14  -5   26.94    6.04
  -6 -14  -6    5.24    4.21
  -6 -14  -7    2.81    4.00
  -6  14  -7    1.39    4.23
  -6 -14  -8   89.42    9.49
  -6  14  -8   76.18    9.25
  -6 -14  -9   27.24    6.14
  -6  14  -9   40.05    7.54
  -6  14 -10  487.78   24.53
  -6 -14 -10  519.41   23.36
  -6  14 -11    6.40    5.18
  -6  14 -12  124.77   13.11
   6  15 -13   26.99    6.73
   6  15 -12   66.38    9.51
   6  15 -12   58.55    9.01
   6  15 -11   97.51   10.46
   6  15 -11  109.18   10.82
   6  15 -10   80.81    9.31
   6  15 -10   77.53    8.98
   6  15  -9   57.76    7.74
   6  15  -9   68.28    8.55
   6  15  -8  193.36   13.12
   6  15  -8  181.52   12.65
   6  15  -7  373.74   17.74
   6  15  -7  329.20   17.00
   6  15  -6  431.51   18.84
   6  15  -6  458.75   19.75
   6  15  -5  246.98   13.49
   6  15  -5  283.16   14.88
   6  15  -4  179.02   11.05
   6  15  -4  185.21   11.88
   6  15  -3  289.56   15.01
   6  15  -3  290.38   13.66
   6  15  -2   10.70    4.51
   6  15  -2   12.56    3.47
  -6 -15   2   14.27    5.01
  -6 -15   1    1.68    4.70
  -6  15   1    0.39    2.30
   6  15  -1    3.32    3.67
  -6 -15   0   13.12    4.88
  -6  15   0    5.88    2.74
  -6 -15  -1   99.52    9.78
  -6  15  -1   98.37    7.57
  -6 -15  -2  112.96   10.29
  -6  15  -2  112.84    8.49
  -6 -15  -3  281.96   16.26
  -6  15  -3  272.62   13.50
  -6 -15  -4  199.39   13.75
  -6  15  -4  194.29   11.76
  -6 -15  -5  179.86   13.17
  -6  15  -5  154.42   10.86
  -6 -15  -6    3.82    4.10
  -6 -15  -7  217.39   14.80
  -6  15  -7  198.50   14.07
  -6 -15  -8  303.06   17.40
  -6  15  -8  263.72   16.63
  -6  15  -9  288.76   17.98
  -6 -15  -9  287.30   17.17
  -6  15 -10    9.78    4.98
  -6  15 -11   68.10    9.75
   6  16 -13  429.15   23.65
   6  16 -13  480.10   24.07
   6  16 -12   39.66    7.92
   6  16 -12   65.56    9.23
   6  16 -11  224.56   15.98
   6  16 -11  252.32   16.50
   6  16 -10   12.33    4.57
   6  16 -10   20.68    5.89
   6  16  -9  519.21   22.98
   6  16  -9  485.16   22.49
   6  16  -8   69.87    8.11
   6  16  -8   58.39    8.11
   6  16  -7   44.01    6.74
   6  16  -7   41.70    6.52
   6  16  -6   11.23    4.14
   6  16  -6    9.50    4.25
   6  16  -5   96.13    8.55
   6  16  -5   97.57    9.38
   6  16  -4    6.25    4.03
   6  16  -4   10.06    3.82
   6  16  -3  450.70   19.71
   6  16  -2   62.87    7.39
  -6 -16   2   68.02    8.73
   6  16  -1 1060.02   32.69
  -6  16   1 1072.60   29.72
  -6 -16   1 1080.05   35.44
  -6 -16   0    1.48    4.41
  -6  16   0   -1.42    3.08
  -6 -16  -1  203.76   13.84
  -6  16  -1  186.83   10.80
  -6 -16  -2  139.41   11.66
  -6  16  -2  152.09   10.00
  -6 -16  -3  480.36   22.25
  -6  16  -3  541.88   20.25
  -6  16  -4   24.51    4.98
  -6 -16  -4    7.02    3.92
  -6  16  -5    4.13    3.77
  -6 -16  -5   -2.77    3.91
  -6  16  -6   13.50    4.03
  -6  16  -6   13.86    5.04
  -6 -16  -6    7.62    4.49
  -6 -16  -7  136.06   11.75
  -6  16  -7  131.34   11.53
  -6 -16  -8   38.16    7.17
  -6  16  -8   35.32    7.36
  -6  16  -9  215.96   15.74
  -6 -16  -9  235.36   15.60
  -6  16 -10   26.71    6.69
  -6  16 -11  281.92   19.09
   6  17 -12   -1.56    5.18
   6  17 -12    2.86    4.72
   6  17 -11   12.64    5.37
   6  17 -11    9.22    5.27
   6  17 -10   39.47    6.75
   6  17 -10   47.03    7.61
   6  17  -9   83.95    9.71
   6  17  -9   85.46    9.42
   6  17  -8    4.67    4.03
   6  17  -8    7.92    4.81
   6  17  -7  750.91   27.17
   6  17  -7  796.44   28.84
   6  17  -6   14.57    4.84
   6  17  -5  131.02   10.92
   6  17  -4   10.04    4.81
   6  17  -3  640.28   24.78
   6  17  -2    2.35    3.60
  -6 -17   2   -2.67    5.00
  -6 -17   1    9.75    5.46
   6  17  -1    6.78    4.38
  -6 -17   0   -6.12    4.85
  -6  17   0   -4.67    3.37
  -6 -17  -1   -8.71    5.53
  -6  17  -1    1.53    2.85
  -6 -17  -2   30.06    6.38
  -6  17  -2   33.96    5.35
  -6 -17  -3  137.59   11.97
  -6  17  -3  142.52   10.29
  -6  17  -4   19.74    4.94
  -6 -17  -4   29.10    6.59
  -6 -17  -5  569.13   25.01
  -6  17  -5  562.31   23.20
  -6  17  -5  558.80   22.55
  -6 -17  -6  166.46   13.29
  -6  17  -6  144.34   11.40
  -6  17  -6  162.42   12.18
  -6  17  -7  129.17   10.90
  -6  17  -7  144.30   12.14
  -6 -17  -7  158.63   12.95
  -6 -17  -8   92.37    9.94
  -6  17  -8   92.47   10.15
  -6  17  -9  183.41   14.62
  -6  17 -10   15.85    6.29
   6  18 -12  151.70   13.66
   6  18 -11   67.86    8.81
   6  18 -11   76.93    9.73
   6  18 -10   29.95    6.75
   6  18 -10   36.82    7.66
   6  18  -9  188.22   14.32
   6  18  -8   24.03    6.10
   6  18  -7   37.95    6.98
   6  18  -6   -0.29    4.16
   6  18  -5   16.36    5.20
   6  18  -4  313.93   17.41
   6  18  -3  128.18   10.93
   6  18  -2  121.51   10.74
  -6 -18   2  106.47   10.91
   6  18  -1  400.65   19.51
  -6 -18   1  391.83   20.80
  -6 -18   0  326.60   18.89
  -6 -18  -1   60.03    8.72
  -6 -18  -2  546.22   24.52
  -6  18  -2  555.70   21.45
  -6 -18  -3  296.73   17.75
  -6  18  -3  309.06   15.80
  -6  18  -4   55.81    7.02
  -6 -18  -4   69.42    8.97
  -6  18  -5   -6.24    4.57
  -6 -18  -5   -0.15    4.19
  -6  18  -6   27.69    5.78
  -6 -18  -6   14.76    5.23
  -6  18  -7    1.95    3.70
  -6  18  -7    6.28    4.21
  -6 -18  -7    3.62    3.94
  -6  18  -8   43.04    7.41
  -6  18  -8   30.47    6.62
  -6  18  -9   40.56    7.52
  -6  18  -9   63.20    9.49
  -6  18 -10  132.26   13.29
   6  19 -10  132.48   12.73
   6  19  -9   16.62    6.28
   6  19  -8  159.28   13.26
   6  19  -7   60.81    8.53
   6  19  -6  337.07   18.74
   6  19  -5   23.98    5.90
   6  19  -4  177.94   13.58
   6  19  -3  113.19   10.85
   6  19  -2   65.01    8.42
  -6 -19   2   79.15    9.92
  -6 -19   1    3.19    5.41
  -6 -19   0   60.66    9.13
  -6 -19  -1   -1.30    4.35
  -6 -19  -2   66.63    9.00
  -6 -19  -3  156.12   13.38
  -6 -19  -4  285.42   18.01
  -6 -19  -5    2.84    4.82
  -6 -19  -6  383.24   21.14
  -6 -19  -7   32.98    6.99
   6  20  -9    9.33    4.92
   6  20  -8   65.55    9.27
   6  20  -7    6.28    4.34
   6  20  -6   12.65    5.73
   6  20  -5    0.95    4.19
   6  20  -4   34.24    7.26
   6  20  -3    8.36    5.08
   6  20  -2  221.53   15.21
  -6 -20   2  197.10   15.67
  -6 -20   1   19.94    5.98
  -6 -20   0  302.46   18.77
  -6 -20  -1   -1.03    4.57
  -6 -20  -2  593.28   26.84
  -6 -20  -3   30.28    7.33
  -6 -20  -4   80.10    9.84
  -6 -20  -5   26.20    6.70
  -6 -20  -6   33.72    7.44
   6  21  -7   79.54   10.29
   6  21  -6   85.76   10.21
   6  21  -5   40.02    7.28
   6  21  -4  148.98   13.17
   6  21  -3  158.84   13.44
  -6 -21   2  138.06   13.22
   6  21  -2  126.25   11.84
  -6 -21   1   88.18   11.17
  -6 -21   0   24.57    6.97
  -6 -21  -1   25.08    6.72
  -6 -21  -2    3.89    5.06
  -6 -21  -3    3.64    4.71
  -6 -21  -4  376.76   21.50
  -6 -21  -5  219.02   16.14
   6  22  -4    8.58    5.28
   6  22  -3  101.27   11.17
   6  22  -2  308.43   19.00
  -6 -22   2  298.04   19.95
  -6 -22   1  323.14   20.61
  -6 -22   0   41.21    7.97
  -6 -22  -1  218.25   16.71
  -6 -22  -2   61.40    9.60
  -6 -22  -3  210.13   16.10
  -6 -22  -4  123.48   12.78
   7   0 -17    2.47    5.08
   7   0 -16   -7.80    5.75
   7   0 -15  314.88   18.86
   7   0 -14   -1.86    4.49
   7   0 -13  658.27   26.85
   7   0 -12    2.36    3.87
   7   0 -11  318.13   16.86
   7   0 -10   -0.27    3.47
  -7   0   9  388.84   13.34
   7   0  -9  377.79   17.63
   7   0  -8   -1.84    3.78
  -7   0   8    2.03    2.13
  -7   0   7  825.93   22.08
   7   0  -7  771.17   25.71
   7   0  -6    3.86    3.47
  -7   0   6    2.40    2.06
   7   0  -5  311.44   14.46
  -7   0   5  297.62   12.22
   7   0  -4    3.02    3.40
  -7   0   4    2.99    2.53
   7   0  -3  712.30   22.73
  -7   0   3  693.54   21.00
  -7   0   2    2.87    2.83
   7   0  -2    1.44    3.54
  -7   0   1 1628.51   38.57
   7   0  -1 1605.86   39.56
  -7   0   0    0.23    2.98
   7   0   0    5.62    3.82
  -7   0  -1  820.35   24.70
  -7   0  -2   -1.39    3.05
  -7   0  -3 2121.50   49.72
  -7   0  -4   -2.08    2.99
  -7   0  -5   42.85    6.65
  -7   0  -6   -2.13    4.02
  -7   0  -7   -0.96    4.10
  -7   0  -8   -2.15    4.46
  -7   0  -9  254.56   15.34
  -7   0 -10   -0.22    3.79
  -7   0 -11  341.38   18.97
  -7   0 -12    0.54    4.00
  -7   0 -13  419.23   22.49
  -7   0 -14   12.40    5.93
   7  -1 -17  135.98   13.38
   7   1 -16    9.98    5.51
   7  -1 -16    0.61    4.69
   7   1 -15  154.49   13.21
   7  -1 -15  135.39   12.47
   7   1 -14  115.44   11.53
   7  -1 -14  123.91   11.41
   7   1 -13   45.83    7.29
   7  -1 -13   31.63    6.40
   7   1 -12  177.99   13.15
   7  -1 -12  183.88   13.21
   7  -1 -11    5.00    3.86
   7   1 -11   -0.31    4.14
   7   1 -10  105.83    9.46
   7  -1 -10   86.39    8.62
  -7  -1   9  215.00    9.94
   7   1  -9  187.35   12.27
   7  -1  -9  183.36   12.18
  -7  -1   8   25.33    3.79
   7   1  -8   44.77    6.45
   7  -1  -8   32.55    5.82
  -7   1   8   36.72    3.97
  -7  -1   7  544.78   17.21
   7   1  -7  542.45   20.53
   7  -1  -7  482.05   19.43
  -7   1   7  513.98   15.91
  -7  -1   6  384.22   14.09
   7   1  -6  381.25   16.56
   7  -1  -6  361.72   16.08
  -7   1   6  380.40   13.36
  -7  -1   5  200.79   10.07
   7   1  -5  203.91   11.80
   7   1  -5  207.21    5.68
   7  -1  -5  207.78   11.66
  -7   1   5  206.93    9.65
  -7  -1   4  125.96    7.96
   7   1  -4   99.89    8.06
   7  -1  -4  121.80    8.85
  -7   1   4  113.63    7.22
  -7  -1   3 1308.64   33.09
   7   1  -3 1388.88   35.19
   7  -1  -3 1343.32   34.95
  -7   1   3 1361.15   32.48
  -7  -1   2  282.50   12.68
   7   1  -2  285.80   13.39
   7  -1  -2  301.43   13.73
  -7   1   2  275.63   12.16
  -7  -1   1    7.98    3.81
  -7   1   1    6.16    3.07
   7   1  -1    5.51    3.80
   7  -1  -1    9.77    4.00
  -7  -1   0   71.23    6.81
   7   1   0   92.72    7.61
  -7   1   0   80.91    6.86
   7  -1   0   85.84    7.16
  -7  -1  -1  148.40    9.59
  -7   1  -1  141.97    9.19
  -7   1  -2  140.80    9.43
  -7  -1  -2  142.40    9.70
  -7   1  -3  441.03   17.70
  -7  -1  -3  443.26   17.99
  -7   1  -4    2.07    3.77
  -7  -1  -4    6.35    3.82
  -7  -1  -5  468.52   19.41
  -7   1  -5  484.19   19.59
  -7  -1  -6  118.86    9.91
  -7   1  -6  113.46    9.73
  -7  -1  -7  531.89   21.67
  -7   1  -7  505.79   21.39
  -7   1  -8  353.86   17.90
  -7  -1  -8  366.67   18.21
  -7   1  -9  778.60   28.67
  -7  -1  -9  798.89   28.71
  -7  -1 -10    3.19    4.05
  -7   1 -10    3.55    4.49
  -7  -1 -11  215.70   14.90
  -7   1 -11  205.48   14.63
  -7  -1 -12   83.86   10.01
  -7  -1 -13    5.84    4.88
  -7   1 -13   13.30    5.33
  -7   1 -14   52.89    8.85
  -7  -1 -14   34.94    7.58
   7  -2 -17   79.66   10.19
   7   2 -16    7.85    5.34
   7  -2 -16    7.75    4.82
   7   2 -15   14.45    5.10
   7  -2 -15   21.85    5.88
   7   2 -14  460.06   22.66
   7  -2 -14  424.12   21.22
   7   2 -13  291.17   17.44
   7  -2 -13  289.14   16.91
   7   2 -12  925.79   32.54
   7  -2 -12  984.18   32.39
   7   2 -11   69.48    8.18
   7  -2 -11   67.23    7.98
   7   2 -10  111.99    9.85
   7  -2 -10  112.11    9.67
  -7  -2  10  114.11    7.62
  -7  -2   9   94.79    6.77
   7   2  -9  112.89    9.61
   7  -2  -9  107.82    9.27
  -7  -2   8  247.40   11.32
  -7   2   8  273.42   10.00
   7   2  -8  252.76   14.09
   7  -2  -8  265.96   14.07
  -7  -2   7   66.54    5.86
   7   2  -7   63.99    7.16
  -7   2   7   69.07    5.00
   7  -2  -7   56.77    6.73
  -7  -2   6   74.19    6.10
   7   2  -6   96.30    8.42
  -7   2   6   80.64    5.60
   7  -2  -6   72.95    7.44
  -7  -2   5  118.71    7.82
   7   2  -5  119.17    9.00
   7  -2  -5  103.47    8.32
   7   2  -5  125.43    4.70
  -7   2   5  122.54    7.07
  -7  -2   4  155.21    9.15
   7   2  -4  156.68    4.93
   7  -2  -4  166.17   10.17
  -7   2   4  163.53    8.59
   7   2  -4  168.58   10.65
  -7  -2   3  240.80   11.56
   7   2  -3  270.37   12.96
   7  -2  -3  228.82   12.03
  -7   2   3  239.49   10.70
  -7  -2   2  399.50   15.67
   7   2  -2  394.04   16.16
   7  -2  -2  400.91   16.23
  -7   2   2  397.24   14.61
  -7  -2   1  210.33   11.05
   7   2  -1  192.43   10.96
   7  -2  -1  203.61   11.37
  -7   2   1  196.44   10.21
  -7   2   0  868.11   24.98
  -7  -2   0  900.21   25.97
   7   2   0  860.25   25.90
  -7   2  -1  318.13   13.96
  -7  -2  -1  311.74   14.22
  -7   2  -2 1126.07   31.09
  -7  -2  -2 1113.38   31.21
  -7   2  -3  342.52   15.46
  -7  -2  -3  332.41   15.35
  -7   2  -4    7.01    3.54
  -7  -2  -4    1.95    3.89
  -7   2  -5    7.99    4.42
  -7  -2  -5    4.84    3.46
  -7  -2  -6  101.87    9.24
  -7   2  -6  111.22    9.52
  -7  -2  -7    8.28    4.20
  -7   2  -7    7.94    3.78
  -7   2  -8  129.33   10.83
  -7  -2  -8  132.37   10.77
  -7  -2  -9  160.24   12.18
  -7   2  -9  163.62   12.58
  -7   2 -10   89.63    9.71
  -7  -2 -10  127.83   11.27
  -7  -2 -11    4.00    3.75
  -7  -2 -12  110.64   11.11
  -7  -2 -13   94.42   10.57
  -7  -2 -13   90.40   10.43
  -7   2 -13   92.97   10.92
  -7   2 -14  630.19   28.62
  -7  -2 -14  568.23   26.46
  -7  -2 -15   35.49    8.13
   7  -3 -17   10.62    5.30
   7   3 -16   15.43    5.92
   7  -3 -16   22.40    6.55
   7   3 -15    4.24    5.42
   7  -3 -15   11.66    5.58
   7   3 -14  219.03   15.57
   7  -3 -14  224.97   15.06
   7   3 -13   15.07    5.52
   7  -3 -13   -1.46    3.61
   7   3 -12   98.02   10.01
   7  -3 -12  108.50   10.04
   7   3 -11   34.12    6.67
   7  -3 -11   32.85    5.91
  -7  -3  10   75.72    6.43
   7   3 -10   66.45    7.89
   7  -3 -10   77.27    8.13
   7   3  -9  129.49   10.39
   7  -3  -9  125.79   10.05
  -7  -3   9  126.31    8.29
   7   3  -8 1045.77   31.63
   7  -3  -8  996.77   30.28
  -7  -3   8 1019.70   27.61
  -7  -3   7   42.28    5.09
   7   3  -7   39.49    5.95
  -7   3   7   41.43    3.69
   7  -3  -7   36.07    5.44
  -7  -3   6  593.80   19.54
   7   3  -6  625.51   22.18
   7  -3  -6  613.14   21.58
   7   3  -6  626.47   15.63
  -7   3   6  614.54   17.14
   7   3  -5   48.96    3.35
  -7  -3   5   53.08    5.45
   7   3  -5   34.94    5.29
  -7   3   5   46.06    4.33
   7  -3  -5   45.81    5.71
  -7  -3   4  467.31   16.65
   7   3  -4  413.25   10.90
   7   3  -4  481.87   18.04
   7  -3  -4  448.98   17.28
  -7   3   4  453.21   14.74
  -7  -3   3   33.15    4.86
   7   3  -3   34.91    5.29
   7  -3  -3   43.91    5.61
  -7   3   3   32.44    3.92
  -7  -3   2   33.03    4.94
   7   3  -2   36.16    5.51
   7  -3  -2   40.45    5.62
  -7   3   2   35.71    4.42
  -7   3   1   19.55    3.47
   7   3  -1   19.09    4.21
  -7  -3   1   11.93    3.75
   7  -3  -1   13.50    4.00
  -7   3   0   13.26    3.88
   7   3   0    1.28    2.89
  -7  -3   0    3.05    3.22
  -7  -3  -1   11.43    3.90
  -7   3  -1    8.95    3.47
   7   3   1    8.18    3.32
  -7   3  -2  210.86   11.56
  -7  -3  -2  210.22   11.86
  -7   3  -3   21.47    4.70
  -7  -3  -3   19.79    4.59
  -7   3  -4  625.69   22.37
  -7  -3  -4  648.53   22.93
  -7   3  -5   28.75    5.74
  -7  -3  -5   30.57    5.44
  -7   3  -6  682.43   24.94
  -7  -3  -6  680.75   24.76
  -7  -3  -7  173.49   12.20
  -7   3  -7  166.55   11.95
  -7  -3  -8 1177.06   36.38
  -7   3  -8 1202.68   36.85
  -7  -3  -9    8.09    4.01
  -7   3  -9    7.04    4.33
  -7  -3 -10   21.98    5.74
  -7  -3 -11   -5.21    4.55
  -7  -3 -12  220.03   15.69
  -7   3 -12  227.37   16.12
  -7   3 -13   13.36    5.48
  -7  -3 -13   15.92    5.75
  -7  -3 -13    4.53    4.55
  -7   3 -14   80.71   10.63
  -7  -3 -14   87.94   10.56
  -7  -3 -15   70.64    9.41
   7  -4 -17    5.01    4.86
   7   4 -16   74.56   10.38
   7  -4 -16   62.05    8.90
   7   4 -15   78.86   10.11
   7  -4 -15   98.89   10.51
   7   4 -14  544.96   25.48
   7  -4 -14  557.15   24.24
   7   4 -13   46.81    7.75
   7  -4 -13   38.19    6.40
   7   4 -12  304.17   17.53
   7  -4 -12  273.79   15.91
   7   4 -11  228.88   14.75
   7  -4 -11  254.34   14.62
  -7  -4  11  215.97   11.54
   7   4 -10  397.10   19.27
   7  -4 -10  423.35   18.65
  -7  -4  10  414.05   16.26
   7   4  -9  295.87   15.91
   7  -4  -9  330.99   16.01
  -7  -4   9  306.53   13.73
   7   4  -8  113.79    9.96
   7  -4  -8  110.25    9.10
  -7  -4   8  100.11    7.62
   7   4  -7  140.63   10.40
   7  -4  -7  144.11    9.92
  -7  -4   7  146.25    9.22
  -7  -4   6  316.01   13.84
  -7   4   6  308.15   10.95
   7   4  -6  314.84   15.20
   7  -4  -6  323.10   14.90
   7   4  -6  386.35   11.44
  -7   4   5   22.24    3.18
  -7  -4   5   16.17    4.04
   7   4  -5   10.53    3.85
   7   4  -5   23.79    2.59
   7  -4  -5   20.20    4.03
  -7  -4   4  128.21    8.70
  -7   4   4  122.10    7.08
   7   4  -4  124.90    9.24
   7  -4  -4  127.06    9.10
   7   4  -4  135.08    5.64
  -7  -4   3  113.59    8.23
  -7   4   3  104.70    6.86
   7   4  -3  122.20    9.05
   7  -4  -3  108.33    8.17
  -7  -4   2 1056.67   29.56
  -7   4   2 1110.01   28.00
   7   4  -2 1066.69   29.69
   7  -4  -2 1070.11   29.86
  -7  -4   1  128.39    8.92
  -7   4   1  119.35    7.80
   7   4  -1  104.11    8.09
   7  -4  -1  110.31    8.21
  -7  -4   0  103.12    8.25
  -7   4   0  128.75    8.43
   7   4   0  122.84    8.76
  -7   4  -1    7.35    3.47
   7   4   1   -0.63    3.21
  -7  -4  -1   -0.56    3.80
  -7  -4  -2 1074.48   30.59
  -7   4  -2 1023.42   29.37
  -7  -4  -3  338.33   15.83
  -7   4  -3  383.54   16.29
  -7  -4  -4   43.76    6.52
  -7   4  -4   48.09    6.60
  -7   4  -5   80.83    8.21
  -7  -4  -5   80.66    8.13
  -7   4  -6    4.97    4.03
  -7  -4  -6    2.95    3.27
  -7  -4  -7    0.85    4.01
  -7   4  -7    7.46    4.25
  -7  -4  -8  224.66   14.22
  -7   4  -8  204.34   13.93
  -7  -4  -9   29.10    6.01
  -7  -4 -10  400.29   19.86
  -7  -4 -11   43.24    7.15
  -7  -4 -12  368.90   19.95
  -7   4 -12  367.73   20.66
  -7  -4 -13    7.96    4.20
  -7   4 -13    8.18    4.45
  -7  -4 -13    5.70    4.33
  -7   4 -14  350.16   21.25
  -7  -4 -14  293.29   18.20
  -7  -4 -14  289.03   18.56
  -7  -4 -15   36.70    7.58
   7  -5 -17  115.84   11.86
   7   5 -16  115.85   12.40
   7  -5 -16  122.88   11.93
   7   5 -15   89.26   10.94
   7  -5 -15   89.55    9.83
   7   5 -14    8.59    5.90
   7  -5 -14   13.61    4.79
   7   5 -13   15.76    5.43
   7  -5 -13    3.95    3.86
   7   5 -12  111.26   10.92
   7  -5 -12  108.89    9.88
   7   5 -11   18.05    5.13
   7  -5 -11   27.53    5.55
   7   5 -10   25.10    5.66
   7  -5 -10   23.39    5.20
   7   5  -9  354.59   17.74
   7  -5  -9  377.72   17.00
  -7  -5   9  380.62   15.92
   7   5  -8 1108.60   33.53
   7  -5  -8 1139.51   32.34
  -7  -5   8 1094.98   30.50
   7   5  -7  791.54   26.56
   7  -5  -7  795.85   25.53
  -7  -5   7  790.66   24.42
  -7   5   6   24.11    3.00
  -7  -5   6   25.38    4.42
   7   5  -6   25.54    3.21
   7   5  -6   26.89    5.61
   7  -5  -6   27.49    4.88
  -7  -5   5  307.87   13.96
   7   5  -5  311.74   14.85
   7   5  -5  326.15   10.59
  -7   5   5  296.67   10.95
   7  -5  -5  322.30   14.51
  -7  -5   4  996.15   27.90
   7   5  -4  972.68   28.72
   7   5  -4  936.35   21.92
  -7   5   4  979.40   24.24
   7  -5  -4  969.40   28.11
  -7  -5   3  557.21   19.74
   7   5  -3  591.14   15.05
   7   5  -3  606.45   20.75
  -7   5   3  547.79   17.23
   7  -5  -3  555.11   19.84
  -7   5   2   12.15    3.26
  -7  -5   2    9.12    3.75
   7   5  -2   15.01    4.24
   7  -5  -2    4.83    3.22
  -7   5   1    9.51    3.13
  -7  -5   1    6.46    3.82
   7   5  -1    7.89    3.96
  -7  -5   0  380.26   16.49
   7   5   0  400.92   16.18
  -7   5   0  409.69   15.59
  -7   5  -1   62.25    6.32
  -7  -5  -1   73.98    7.34
   7   5   1   81.33    7.04
  -7   5  -2   23.35    4.82
  -7  -5  -2   12.73    4.18
  -7   5  -3  188.81   11.36
  -7  -5  -3  179.98   11.68
  -7   5  -4  444.20   18.54
  -7  -5  -4  454.96   19.10
  -7   5  -5  421.17   18.58
  -7  -5  -5  450.41   19.16
  -7   5  -6   84.52    8.66
  -7  -5  -6   85.44    8.75
  -7  -5  -7  366.98   17.85
  -7   5  -7  351.26   17.90
  -7  -5  -8  527.16   22.36
  -7  -5  -9  260.80   15.84
  -7  -5 -10   65.78    8.53
  -7  -5 -11   -3.17    4.13
  -7  -5 -12    1.64    4.35
  -7   5 -12    6.10    5.61
  -7  -5 -12    8.46    4.87
  -7  -5 -13    8.41    5.60
  -7  -5 -13    4.87    4.54
  -7   5 -13   -1.95    5.32
  -7  -5 -14   71.18    9.70
  -7  -5 -14   53.66    8.36
   7   6 -15   57.80    9.17
   7  -6 -15   55.55    7.91
   7  -6 -14  115.29   10.59
   7   6 -14  123.67   12.41
   7   6 -13  591.69   26.23
   7  -6 -13  575.91   23.90
   7   6 -12   24.17    6.64
   7  -6 -12    6.54    3.79
   7   6 -11  134.31   11.40
   7  -6 -11  118.21    9.98
   7   6 -10  282.00   16.18
   7  -6 -10  263.63   14.39
   7   6  -9  450.61   20.18
   7  -6  -9  437.15   18.38
   7   6  -8  150.00   11.22
   7  -6  -8  126.53    9.39
  -7  -6   8  163.07   10.32
  -7  -6   7   72.84    7.16
   7   6  -7   83.39    8.31
   7  -6  -7   79.50    7.86
   7   6  -7  102.39    6.55
  -7  -6   6   16.52    4.04
   7   6  -6   22.12    4.98
   7   6  -6   14.75    2.79
   7  -6  -6   15.76    3.85
  -7   6   5   72.87    4.97
  -7  -6   5   54.65    6.47
   7   6  -5   68.29    4.90
   7   6  -5   73.14    7.49
   7  -6  -5   65.94    6.76
  -7  -6   4   22.96    4.21
   7   6  -4   31.23    3.47
   7   6  -4   23.83    4.74
  -7   6   4   19.57    3.07
   7  -6  -4   18.60    4.11
  -7  -6   3  659.59   22.00
   7   6  -3  674.71   17.38
   7   6  -3  675.29   22.36
   7  -6  -3  621.19   21.41
  -7   6   3  624.64   18.63
  -7   6   2  495.14   16.65
  -7  -6   2  537.22   19.58
   7   6  -2  488.62   18.56
   7  -6  -2  540.82   19.23
  -7   6   1  888.15   24.65
  -7  -6   1  851.90   26.63
   7   6  -1  870.51   26.18
  -7   6   0    2.84    2.71
  -7  -6   0    3.62    3.69
   7   6   0    3.86    3.16
  -7   6  -1  664.18   22.55
  -7  -6  -1  719.63   24.75
  -7   6  -1  789.20   16.78
   7   6   1  720.98   23.18
  -7   6  -2  143.83    9.57
  -7  -6  -2  121.29    9.46
  -7  -6  -3  301.16   15.17
  -7   6  -3  292.33   14.40
  -7  -6  -4   39.47    6.18
  -7   6  -4   38.78    5.86
  -7  -6  -5   78.92    8.22
  -7   6  -5   76.27    8.13
  -7  -6  -6   -2.84    4.63
  -7  -6  -7   56.56    7.31
  -7  -6  -8   55.22    7.63
  -7  -6  -9  378.00   19.18
  -7  -6 -10  108.63   10.44
  -7  -6 -11  162.26   13.06
  -7  -6 -12  143.83   11.73
  -7   6 -12  161.06   14.01
  -7  -6 -12  135.47   11.87
  -7  -6 -13  670.19   28.53
  -7   6 -13  722.74   31.00
  -7  -6 -14   41.15    7.61
   7   7 -15  191.69   15.61
   7   7 -14   -0.55    4.06
   7  -7 -14    5.22    3.70
   7   7 -13    4.54    5.00
   7  -7 -13   -0.22    3.55
   7   7 -12    7.42    4.96
   7  -7 -12    5.61    3.67
   7   7 -11  203.58   14.43
   7  -7 -11  244.90   14.09
   7   7 -10   12.51    4.95
   7  -7 -10    3.05    3.41
   7   7  -9  100.55    9.69
   7  -7  -9  125.82    9.59
   7   7  -8    1.09    3.24
   7  -7  -8   -3.46    3.60
   7   7  -7 1365.07   37.94
   7  -7  -7 1352.12   35.88
   7   7  -7 1324.96   32.12
  -7  -7   7 1348.77   36.26
   7   7  -6  193.07   12.03
   7   7  -6  199.05    9.24
   7  -7  -6  194.26   11.21
  -7  -7   6  184.73   11.41
   7   7  -5  957.75   29.08
   7   7  -5 1044.13   24.73
   7  -7  -5  880.27   27.36
  -7  -7   5  923.71   28.48
   7   7  -4  152.16   10.32
   7   7  -4  167.06    7.90
   7  -7  -4  147.86    9.68
  -7   7   4  139.61    7.40
  -7  -7   4  129.98    9.53
  -7  -7   3  424.15   17.21
   7   7  -3  365.01   12.68
   7   7  -3  366.78   16.01
  -7   7   3  379.96   13.54
   7  -7  -3  383.95   15.81
  -7  -7   2   69.90    7.26
   7   7  -2   85.47    7.57
  -7   7   2   70.67    5.99
  -7   7   1   29.61    4.61
  -7  -7   1   37.97    5.81
   7   7  -1   21.78    4.41
  -7   7   0   30.38    4.66
  -7  -7   0   27.70    5.40
   7   7   0   26.58    4.88
  -7   7  -1   86.13    4.48
  -7  -7  -1   78.71    8.23
  -7   7  -1   83.59    7.31
   7   7   1   78.75    7.24
  -7   7  -2   18.30    4.15
  -7  -7  -2   17.42    4.97
  -7   7  -3  825.56   26.86
  -7  -7  -3  892.81   28.47
  -7  -7  -4   -2.95    3.64
  -7  -7  -5   85.59    8.67
  -7  -7  -6    5.55    3.50
  -7  -7  -7 1235.16   37.21
  -7  -7  -8   31.64    6.19
  -7  -7  -9  259.65   15.77
  -7  -7 -10   -0.49    4.07
  -7  -7 -11    5.92    4.19
  -7  -7 -12    4.88    4.22
  -7   7 -12   -0.01    4.58
  -7   7 -13   20.75    7.03
  -7  -7 -13   20.90    6.03
  -7  -7 -14    8.29    5.51
   7   8 -15    4.35    5.03
   7   8 -14  139.31   12.98
   7   8 -13  617.82   27.37
   7  -8 -13  643.94   24.88
   7   8 -12   67.44    9.01
   7  -8 -12   68.68    7.80
   7   8 -11  293.45   17.16
   7  -8 -11  281.19   15.01
   7   8 -10  172.55   12.65
   7  -8 -10  168.00   11.27
   7   8  -9  606.75   24.25
   7  -8  -9  617.50   22.23
   7   8  -8  116.26   10.22
   7   8  -8  102.08    7.88
   7  -8  -8  121.06    9.20
   7   8  -7   85.71    8.78
   7   8  -7   77.28    6.37
   7  -8  -7   70.94    7.02
  -7  -8   6    2.31    3.42
   7   8  -6    1.63    3.57
   7   8  -6    1.55    2.37
   7  -8  -6    8.37    3.24
  -7  -8   5    1.70    3.54
   7   8  -5    1.36    3.53
   7   8  -5    0.69    2.36
   7  -8  -5   -0.13    3.00
  -7  -8   4    5.87    4.10
   7   8  -4   18.15    3.41
   7   8  -4   25.03    5.19
   7  -8  -4   18.85    4.23
  -7  -8   3  177.93   11.27
   7   8  -3  170.44    8.47
   7   8  -3  163.81   10.61
   7  -8  -3  175.66   10.54
  -7  -8   2  840.16   27.23
   7   8  -2  893.59   22.99
   7   8  -2  893.79   26.63
  -7  -8   1  374.39   16.84
   7   8  -1  406.28   16.30
  -7  -8   0  429.70   18.28
   7   8   0  415.33   16.58
  -7  -8  -1 1121.21   33.88
  -7   8  -1 1248.12   26.11
   7   8   1 1186.59   31.97
  -7  -8  -2  468.39   19.78
  -7  -8  -3  562.02   22.26
  -7  -8  -4  282.38   15.27
  -7  -8  -5  243.97   14.49
  -7  -8  -6   48.46    7.00
  -7  -8  -7  125.07   10.73
  -7  -8  -8   14.29    4.84
  -7  -8  -9  270.55   16.22
  -7  -8 -10   14.33    5.39
  -7   8 -11   13.85    5.72
  -7  -8 -11   -0.84    4.28
  -7  -8 -12   66.03    8.98
  -7   8 -12   87.63   10.50
  -7   8 -13  773.07   32.64
  -7  -8 -13  674.31   28.87
   7   9 -15  184.02   15.62
   7   9 -14   18.49    6.47
   7   9 -13    4.29    5.09
   7   9 -12   48.86    8.37
   7   9 -11   51.72    8.43
   7  -9 -11   37.37    5.93
   7   9 -10   18.47    5.46
   7  -9 -10   19.29    4.48
   7   9  -9  103.22   10.04
   7  -9  -9   79.67    7.69
   7   9  -8 1129.66   34.73
   7   9  -8 1084.11   30.23
   7  -9  -8 1164.87   32.16
   7   9  -7  340.32   16.91
   7  -9  -7  350.69   15.44
   7   9  -7  346.89   14.33
   7   9  -6  425.09   18.74
   7   9  -6  472.31   16.50
   7  -9  -6  440.49   17.43
  -7  -9   6  456.88   19.20
  -7  -9   5   49.63    6.98
   7   9  -5   53.14    6.54
   7   9  -5   60.15    5.55
   7  -9  -5   70.06    6.89
   7   9  -4 1430.82   37.90
   7   9  -4 1456.58   33.97
   7  -9  -4 1416.78   36.52
  -7  -9   4 1425.53   38.91
   7   9  -3  222.06   10.42
   7   9  -3  219.29   12.10
  -7  -9   3  237.04   13.43
  -7  -9   2  279.60   14.62
   7   9  -2  287.11   11.86
   7   9  -2  274.94   13.53
  -7  -9   1  233.92   13.44
   7   9  -1  247.51   12.44
  -7  -9   0   11.01    4.78
   7   9   0   21.42    4.43
  -7  -9  -1  191.16   12.27
   7   9   1  191.47   10.86
  -7   9  -2    1.65    1.94
  -7  -9  -2   11.03    4.78
  -7  -9  -3  183.03   12.47
  -7  -9  -4 1175.59   35.44
  -7  -9  -5  105.35    9.61
  -7  -9  -6  384.16   18.79
  -7  -9  -7  269.98   15.74
  -7  -9  -8  534.23   23.10
  -7  -9  -9   69.13    8.43
  -7  -9 -10  142.73   12.14
  -7  -9 -11   54.47    8.21
  -7   9 -11   49.98    8.20
  -7  -9 -12    4.03    3.86
  -7   9 -12   -3.03    5.16
  -7  -9 -13   10.12    4.94
   7  10 -14  414.90   22.99
   7  10 -13    1.57    4.85
   7  10 -12  216.50   15.61
   7  10 -11   14.83    5.75
   7  10 -10  510.05   23.12
   7 -10 -10  514.41   20.06
   7  10  -9   13.72    4.93
   7  10  -9   22.87    4.58
   7 -10  -9   17.58    4.13
   7  10  -8   59.04    7.70
   7  10  -8   62.56    6.69
   7 -10  -8   61.92    6.71
   7  10  -7   81.82    8.56
   7  10  -7   69.43    6.74
   7 -10  -7   74.83    7.19
   7  10  -6   77.76    8.21
   7  10  -6   70.63    6.32
   7 -10  -6   92.33    7.75
  -7 -10   5   61.46    7.59
   7  10  -5   63.27    7.16
   7  10  -5   63.06    6.01
   7 -10  -5   64.24    6.46
  -7 -10   4    5.12    3.91
   7  10  -4    4.21    3.09
   7  10  -4    7.77    3.92
  -7 -10   3   24.71    5.75
   7  10  -3   29.23    4.31
   7  10  -3   26.66    5.06
  -7 -10   2 1528.13   41.94
   7  10  -2 1617.11   37.51
   7  10  -2 1592.85   39.77
   7  10  -1   20.12    4.36
  -7 -10   1   22.55    5.33
  -7 -10   0  519.03   21.27
   7  10   0  555.23   19.49
  -7 -10  -1   98.09    9.19
   7  10   1   75.84    6.81
  -7 -10  -2 2173.46   52.90
  -7  10  -2 2051.88   43.37
  -7 -10  -3    6.89    4.77
  -7 -10  -4  559.97   23.17
  -7 -10  -5   48.94    7.42
  -7 -10  -6    5.00    4.40
  -7 -10  -7   16.93    5.92
  -7 -10  -8    2.22    4.33
  -7 -10  -9    7.83    5.00
  -7 -10 -10  215.19   15.03
  -7 -10 -11   -3.77    4.67
  -7  10 -11   -2.15    4.15
  -7 -10 -12  236.74   16.05
  -7  10 -12  232.89   17.10
   7  11 -14  147.86   13.96
   7  11 -13   36.94    7.54
   7  11 -12   16.15    4.94
   7  11 -11   61.52    8.48
   7  11 -10   34.84    6.96
   7  11 -10   28.88    5.45
   7  11  -9   48.67    7.48
   7  11  -9   41.86    5.95
   7  11  -8  700.82   26.59
   7  11  -8  772.58   24.80
   7 -11  -8  719.94   23.87
   7  11  -7  415.71   18.81
   7  11  -7  417.29   16.89
   7 -11  -7  367.42   15.97
   7  11  -6  507.03   20.82
   7  11  -6  524.36   18.85
   7 -11  -6  489.80   18.57
   7  11  -5  493.98   20.17
   7  11  -5  546.73   18.79
  -7 -11   5  510.19   21.54
   7  11  -4 1471.13   39.20
   7  11  -4 1514.66   36.72
  -7 -11   4 1444.77   40.84
  -7 -11   3   75.83    8.44
   7  11  -3   82.58    6.92
   7  11  -3   75.74    7.52
  -7 -11   2  587.51   23.19
   7  11  -2  601.07   19.87
   7  11  -2  613.50   21.30
  -7 -11   1  131.08   10.74
   7  11  -1  115.82    8.61
  -7 -11   0   15.17    5.15
   7  11   0   13.95    3.85
  -7 -11  -1   23.39    5.03
   7  11   1   26.74    4.53
  -7 -11  -2  139.29   11.13
  -7  11  -3   65.68    5.67
  -7 -11  -3   78.69    8.74
  -7 -11  -4  742.50   27.55
  -7 -11  -5   32.82    6.36
  -7 -11  -6  288.21   16.51
  -7 -11  -7  391.18   19.66
  -7 -11  -8  540.46   23.82
  -7 -11  -9    9.61    4.80
  -7  11 -10   58.79    8.71
  -7 -11 -10   79.84    9.48
  -7 -11 -11   22.97    6.31
  -7  11 -11   14.10    5.60
  -7  11 -12  121.73   12.79
  -7 -11 -12  103.41   11.17
   7  12 -14  240.32   17.59
   7  12 -13  652.89   29.03
   7  12 -12  186.06   14.78
   7  12 -11  194.53   14.48
   7  12 -11  206.80   13.24
   7  12 -10   20.08    5.85
   7  12 -10   15.74    4.57
   7  12  -9  251.48   15.60
   7  12  -9  215.03   13.09
   7  12  -8   27.18    6.21
   7  12  -8   28.06    5.24
   7  12  -7   34.56    6.42
   7  12  -7   28.93    5.22
   7  12  -6   31.52    5.79
   7  12  -6   39.57    5.93
   7  12  -5   66.24    6.65
   7  12  -5   61.46    7.22
  -7 -12   4   86.34    9.14
   7  12  -4   78.99    7.16
   7  12  -4   78.98    7.78
   7  12  -3  176.35   10.52
   7  12  -3  178.65   11.11
  -7 -12   3  172.30   12.34
   7  12  -2  432.98   17.53
   7  12  -2  445.46   17.21
  -7 -12   2  428.21   19.86
  -7 -12   1  442.89   20.14
   7  12  -1  449.85   17.46
  -7 -12   0  348.59   17.53
   7  12   0  346.73   14.93
  -7 -12  -1 1076.61   34.12
   7  12   1 1080.24   29.71
  -7 -12  -2  570.30   23.45
  -7 -12  -3  252.00   15.23
  -7 -12  -4    6.69    4.36
  -7 -12  -5    9.64    5.02
  -7 -12  -6   69.68    8.48
  -7 -12  -7    8.34    4.62
  -7 -12  -8   34.58    6.73
  -7 -12  -9  155.05   12.79
  -7  12 -10   20.84    6.87
  -7 -12 -10   12.29    5.01
  -7 -12 -11   32.30    6.70
  -7  12 -11   42.48    8.46
   7  13 -13   14.64    6.75
   7  13 -12   79.05   10.32
   7  13 -12   52.15    7.75
   7  13 -11   57.36    8.48
   7  13 -11   43.36    6.54
   7  13 -10    7.07    4.65
   7  13 -10    5.82    4.01
   7  13  -9  150.21   12.05
   7  13  -9  147.11   11.31
   7  13  -8   22.35    5.80
   7  13  -8    7.12    3.41
   7  13  -7  719.77   26.74
   7  13  -7  789.17   25.95
   7  13  -6   14.51    4.53
   7  13  -6    6.56    3.89
   7  13  -5  496.52   20.27
   7  13  -5  478.06   18.86
  -7 -13   4   -0.30    4.32
   7  13  -4    0.92    3.38
   7  13  -4    1.32    3.06
   7  13  -3  791.61   25.11
   7  13  -3  760.33   25.08
  -7 -13   3  764.37   28.27
  -7 -13   2    6.24    3.87
   7  13  -2   15.03    4.18
   7  13  -2    6.04    3.36
  -7 -13   1    2.53    4.53
   7  13  -1   -0.21    2.70
  -7 -13   0   79.60    8.88
   7  13   0   80.74    7.19
  -7 -13  -1   75.08    8.65
   7  13   1  105.95    8.14
  -7 -13  -2   54.10    7.92
  -7 -13  -3  471.24   21.63
  -7 -13  -4    5.15    4.67
  -7 -13  -5  387.13   20.03
  -7 -13  -6   24.10    6.10
  -7 -13  -7  502.22   23.23
  -7 -13  -8   20.53    5.67
  -7  13  -9  298.04   18.65
  -7 -13  -9  309.17   18.32
  -7  13 -10  139.82   13.22
  -7 -13 -10  141.41   12.49
  -7 -13 -11   80.56    9.72
  -7  13 -11   85.24   10.70
   7  14 -13  503.52   25.56
   7  14 -13  473.37   22.98
   7  14 -12  106.22   11.58
   7  14 -12   89.90   10.15
   7  14 -11  173.21   14.18
   7  14 -11  187.91   13.50
   7  14 -10  172.71   13.65
   7  14 -10  202.00   13.72
   7  14  -9  368.38   19.41
   7  14  -9  364.62   18.12
   7  14  -8   -0.68    4.01
   7  14  -8   -2.80    3.36
   7  14  -7   71.07    8.08
   7  14  -7   62.17    7.32
   7  14  -6   23.07    5.25
   7  14  -6   23.49    4.73
   7  14  -5    6.70    3.72
   7  14  -5   -2.58    3.33
  -7 -14   4   73.01    8.91
   7  14  -4   66.96    7.18
   7  14  -4   55.66    6.76
   7  14  -3  257.88   13.78
   7  14  -3  241.23   13.26
  -7 -14   3  248.24   15.57
  -7 -14   2   77.20    9.00
   7  14  -2   70.85    7.46
   7  14  -2   71.11    7.04
  -7 -14   1  513.86   22.95
   7  14  -1  541.90   19.65
  -7 -14   0   28.34    6.15
  -7 -14  -1  353.09   18.62
  -7 -14  -2   62.85    8.45
  -7 -14  -3  873.45   31.30
  -7 -14  -4   76.72    9.34
  -7 -14  -5   -2.16    4.97
  -7 -14  -6    2.99    4.28
  -7 -14  -7    1.70    4.26
  -7 -14  -8   18.01    6.07
  -7  14  -8   12.03    5.88
  -7  14  -9  248.26   17.18
  -7 -14  -9  255.83   16.77
  -7  14 -10   47.11    8.51
  -7 -14 -10   37.98    6.78
  -7  14 -11  246.27   18.11
   7  15 -13   16.28    6.78
   7  15 -13    5.20    4.68
   7  15 -12   24.27    6.48
   7  15 -12   18.95    6.13
   7  15 -11   23.59    6.60
   7  15 -11   46.97    7.39
   7  15 -10   95.43   10.46
   7  15 -10   82.15    9.18
   7  15  -9  217.38   14.90
   7  15  -9  212.51   14.10
   7  15  -8  170.31   12.82
   7  15  -8  163.69   12.16
   7  15  -7  438.39   20.40
   7  15  -7  464.57   20.08
   7  15  -6  183.74   12.52
   7  15  -6  170.24   11.88
   7  15  -5  167.90   11.67
   7  15  -5  158.09   11.14
   7  15  -4  133.27   10.43
   7  15  -4  121.90    9.58
  -7 -15   4  109.00   10.90
   7  15  -3  636.15   23.22
   7  15  -3  577.72   21.53
  -7 -15   3  597.99   25.50
  -7 -15   2   34.43    6.91
   7  15  -2   21.51    4.83
  -7 -15   1   83.35    9.64
  -7 -15   0   14.55    5.47
  -7 -15  -1   44.17    7.24
  -7 -15  -2   33.72    6.56
  -7 -15  -3  162.90   13.24
  -7 -15  -4  147.46   12.51
  -7 -15  -5  205.42   14.75
  -7 -15  -6  171.35   13.63
  -7 -15  -7   60.92    8.96
  -7  15  -8  367.32   20.50
  -7 -15  -8  370.76   20.54
  -7 -15  -9   93.81   10.71
  -7  15  -9   99.65   11.24
  -7  15 -10   88.25   11.07
  -7 -15 -10   84.34    9.94
   7  16 -13   14.96    5.73
   7  16 -12  362.77   21.43
   7  16 -12  430.29   21.92
   7  16 -11    9.10    5.52
   7  16 -11    9.49    5.00
   7  16 -10  230.31   15.98
   7  16 -10  233.10   15.34
   7  16  -9  138.54   12.13
   7  16  -9  139.54   11.79
   7  16  -8  177.20   13.35
   7  16  -8  188.28   13.25
   7  16  -7    9.27    4.74
   7  16  -7    8.85    4.25
   7  16  -6    8.34    4.42
   7  16  -6    4.53    3.81
   7  16  -5   21.01    5.04
   7  16  -5   18.97    4.79
   7  16  -4   74.16    8.46
  -7 -16   4   79.52    9.37
   7  16  -3  122.40   10.34
  -7 -16   3  127.47   12.00
   7  16  -2  206.81   13.14
  -7 -16   2  211.16   14.97
  -7 -16   1   24.86    5.95
  -7 -16   0  328.09   18.64
  -7 -16  -1    6.47    4.88
  -7 -16  -2  609.19   26.12
  -7 -16  -3   68.09    8.72
  -7 -16  -4   56.45    8.61
  -7 -16  -5   -1.62    4.65
  -7 -16  -6   29.66    6.88
  -7 -16  -7   15.46    5.80
  -7  16  -7   12.83    5.05
  -7  16  -8  168.90   14.19
  -7 -16  -8  208.35   15.49
  -7 -16  -9    5.43    3.91
  -7  16  -9    7.46    5.03
  -7  16 -10  182.49   15.53
   7  17 -12   18.18    6.54
   7  17 -12   21.00    6.06
   7  17 -11    7.58    4.32
   7  17 -11   11.67    4.77
   7  17 -10    1.43    4.85
   7  17 -10    3.01    4.40
   7  17  -9   28.13    6.53
   7  17  -9   22.34    5.92
   7  17  -8  195.30   13.86
   7  17  -8  225.35   14.95
   7  17  -7   18.72    5.68
   7  17  -6  671.99   26.08
   7  17  -5    2.13    3.59
   7  17  -4  273.92   15.84
  -7 -17   4  237.85   16.56
   7  17  -3    9.27    5.10
  -7 -17   3    5.90    5.14
  -7 -17   2   57.29    8.99
   7  17  -2   45.21    7.06
  -7 -17   1   12.54    5.46
  -7 -17   0    6.55    4.97
  -7 -17  -1   18.41    5.74
  -7 -17  -2   88.53   10.32
  -7 -17  -3   19.50    6.13
  -7 -17  -4  204.68   15.37
  -7 -17  -5   86.84   10.50
  -7 -17  -6  264.24   17.60
  -7  17  -6  240.03   15.99
  -7 -17  -7   15.73    5.64
  -7  17  -7    8.38    4.56
  -7  17  -8  715.18   29.80
  -7 -17  -8  682.32   29.25
  -7  17  -9    8.42    4.88
   7  18 -11   99.90   11.01
   7  18 -10   55.71    8.24
   7  18  -9  165.21   13.35
   7  18  -8  147.87   12.41
   7  18  -7    1.53    4.50
   7  18  -6    0.42    4.15
   7  18  -5   24.84    5.89
   7  18  -4   10.86    5.27
  -7 -18   4   16.07    6.78
   7  18  -3  168.10   12.72
  -7 -18   3  170.60   14.37
   7  18  -2  249.59   15.40
  -7 -18   2  228.17   16.37
  -7 -18   1  257.86   17.42
  -7 -18   0  131.56   12.27
  -7 -18  -1   92.71   10.45
  -7 -18  -2  227.98   16.09
  -7 -18  -3  189.22   14.90
  -7 -18  -4   29.11    6.85
  -7 -18  -5    2.83    4.71
  -7 -18  -6   62.61    9.53
  -7 -18  -7    2.55    4.36
  -7  18  -7    8.44    4.78
  -7 -18  -8   62.16    9.25
  -7  18  -8   55.39    8.66
  -7  18  -9   -4.02    5.13
   7  19  -9  141.55   12.94
   7  19  -8  105.96   11.25
   7  19  -7  152.58   12.84
   7  19  -6   -4.29    4.88
   7  19  -5  151.50   12.57
  -7 -19   4  100.56   11.65
   7  19  -4   86.08    9.91
   7  19  -3  491.37   22.89
  -7 -19   3  489.90   25.19
  -7 -19   2   26.93    7.08
  -7 -19   1    6.74    4.88
  -7 -19   0    6.43    5.07
  -7 -19  -1   39.09    7.60
  -7 -19  -2    6.11    4.66
  -7 -19  -3   62.47    9.31
  -7 -19  -4   58.96    9.21
  -7 -19  -5  410.04   22.82
  -7 -19  -6    1.83    4.84
  -7 -19  -7  373.48   21.63
   7  20  -8    2.60    5.36
   7  20  -7   11.87    5.37
   7  20  -6    4.63    4.51
   7  20  -5   13.86    4.97
  -7 -20   4   39.45    7.94
   7  20  -4   65.26    9.03
   7  20  -3  361.35   19.76
  -7 -20   3  367.31   21.66
  -7 -20   2   23.34    6.65
  -7 -20   1  351.20   21.30
  -7 -20   0   58.07    9.55
  -7 -20  -1  317.14   19.79
  -7 -20  -2    1.45    4.81
  -7 -20  -3  225.76   16.87
  -7 -20  -4   21.78    6.87
  -7 -20  -5    2.16    4.39
   7  21  -6  275.88   18.22
   7  21  -5   61.92    8.91
   7  21  -4  103.18   11.25
   7  21  -3  118.44   11.78
  -7 -21   1   -0.41    4.98
  -7 -21   0   69.44   10.07
  -7 -21  -1   14.17    5.62
  -7 -21  -2    3.16    4.50
   8   0 -16   28.43    7.13
   8   0 -15    7.07    4.41
   8   0 -14  773.74   31.14
   8   0 -13   -5.96    5.16
   8   0 -12  518.34   23.55
   8   0 -11   -4.49    3.98
   8   0 -10  327.60   17.36
   8   0  -9    1.90    3.43
  -8   0   8  394.28   14.78
   8   0  -8  387.39   18.45
   8   0  -7   -2.21    3.63
  -8   0   7    1.57    2.51
   8   0  -6   32.83    6.31
  -8   0   6   17.13    3.80
   8   0  -5    1.96    3.61
  -8   0   5   -1.56    2.56
   8   0  -4  164.04   11.14
  -8   0   4  163.93    9.70
  -8   0   3  -29.14    4.74
   8   0  -3   -4.19    4.24
   8   0  -2 1354.45   35.73
  -8   0   2 1186.89   32.65
  -8   0   1   -1.45    3.08
   8   0  -1   -4.10    3.46
   8   0   0 1939.26   47.51
  -8   0   0 1984.81   46.88
  -8   0  -1    0.44    3.03
  -8   0  -2 1223.67   34.62
  -8   0  -3    4.68    3.83
  -8   0  -4  198.56   12.91
  -8   0  -5   -2.77    3.86
  -8   0  -6  188.67   12.93
  -8   0  -7    1.35    4.70
  -8   0  -8  484.35   22.27
  -8   0  -9    6.29    4.80
  -8   0 -10   21.36    5.85
  -8   0 -11   -1.42    4.05
  -8   0 -12  369.30   21.15
  -8   0 -13   -4.24    5.14
   8  -1 -16  150.95   13.81
   8   1 -16  133.34   13.31
   8   1 -15   34.12    7.50
   8  -1 -15   29.82    7.16
   8   1 -14  159.45   13.77
   8  -1 -14  128.79   12.23
   8   1 -13    1.53    4.41
   8  -1 -13    7.29    4.94
   8   1 -12  137.07   12.05
   8  -1 -12  143.85   12.01
   8   1 -11   15.80    5.25
   8  -1 -11   18.41    5.89
   8   1 -10   30.63    6.15
   8  -1 -10   31.61    6.04
   8   1  -9  210.05   13.62
   8  -1  -9  201.26   13.20
  -8  -1   8 1697.15   39.67
   8   1  -8 1705.46   45.43
   8  -1  -8 1676.37   44.83
  -8  -1   7  207.12   10.56
   8   1  -7  206.99   12.98
   8  -1  -7  181.05   12.06
  -8   1   7  196.72    9.79
  -8  -1   6 1423.61   35.39
   8   1  -6 1408.07   39.11
   8  -1  -6 1420.13   39.00
  -8   1   6 1460.75   34.39
  -8  -1   5  389.72   15.57
   8   1  -5  384.12   17.38
   8  -1  -5  374.36   16.99
  -8   1   5  369.60   14.43
  -8  -1   4  834.92   25.09
   8   1  -4  828.86   27.08
   8  -1  -4  857.90   27.23
  -8   1   4  860.84   24.50
  -8  -1   3  466.89   17.53
   8   1  -3  463.05   18.74
   8  -1  -3  439.97   18.43
  -8   1   3  421.99   16.38
  -8  -1   2   26.06    4.78
  -8   1   2   23.48    4.37
   8   1  -2   20.69    4.92
   8  -1  -2   21.54    5.16
  -8  -1   1   70.21    6.93
  -8   1   1   77.91    7.15
   8   1  -1   87.56    8.13
   8  -1  -1   69.52    7.33
  -8  -1   0   13.20    4.32
  -8   1   0   18.62    4.42
   8   1   0   21.88    4.70
  -8  -1  -1   37.12    5.72
  -8   1  -1   44.23    5.93
  -8   1  -2  268.09   14.02
  -8  -1  -2  259.31   13.94
  -8   1  -3  289.34   15.02
  -8  -1  -3  269.62   14.54
  -8  -1  -4  190.92   12.46
  -8   1  -4  186.43   12.41
  -8  -1  -5  242.77   14.30
  -8   1  -5  195.04   12.97
  -8  -1  -6  298.40   16.50
  -8   1  -6  285.75   16.14
  -8  -1  -7  178.71   12.95
  -8   1  -7  181.59   13.26
  -8   1  -8  567.47   24.23
  -8  -1  -8  552.00   24.08
  -8   1  -9  139.47   12.28
  -8  -1  -9  127.91   11.65
  -8   1 -10   37.54    7.23
  -8  -1 -10   27.50    6.71
  -8   1 -11    8.93    4.81
  -8  -1 -11    9.50    5.24
  -8  -1 -12  150.11   13.41
  -8  -1 -13   -1.78    5.22
  -8  -1 -13    3.89    5.37
  -8   1 -13   -5.26    5.59
   8  -2 -16    1.55    4.44
   8   2 -15  246.65   17.71
   8  -2 -15  244.63   16.89
   8   2 -14  225.35   16.27
   8  -2 -14  218.71   15.68
   8   2 -13  262.78   17.24
   8  -2 -13  285.47   17.39
   8   2 -12  227.46   15.57
   8  -2 -12  233.29   15.27
   8   2 -11  338.61   18.51
   8  -2 -11  361.00   18.49
   8   2 -10  389.29   19.49
   8  -2 -10  394.17   19.18
  -8  -2   9  390.60   15.33
   8   2  -9  370.29   18.55
   8  -2  -9  397.97   18.83
   8   2  -8   35.15    6.28
  -8  -2   8   42.05    5.18
   8  -2  -8   52.14    7.18
  -8   2   7   28.86    3.80
   8   2  -7   30.79    6.05
  -8  -2   7   34.38    5.04
   8  -2  -7   37.61    6.51
  -8   2   6    5.70    2.94
   8   2  -6    2.87    3.79
  -8  -2   6    3.63    3.12
   8  -2  -6    4.42    4.25
  -8   2   5    5.68    2.71
   8   2  -5    7.63    4.32
  -8  -2   5    9.20    3.65
   8  -2  -5    6.77    4.20
  -8   2   4    1.73    2.41
   8   2  -4   10.90    4.73
   8  -2  -4   -1.65    3.71
  -8  -2   4    2.55    3.18
  -8  -2   3  991.43   27.50
   8   2  -3  833.04   27.06
   8  -2  -3  802.41   26.62
  -8   2   3  799.94   24.08
  -8  -2   2  572.54   20.20
   8   2  -2  541.46   20.85
   8  -2  -2  575.04   21.04
  -8   2   2  524.48   18.68
  -8   2   1  188.59   10.87
  -8  -2   1  202.44   11.66
   8   2  -1  209.37   12.26
   8  -2  -1  213.22   12.32
  -8   2   0  145.20    9.86
  -8  -2   0  163.25   10.72
   8   2   0  154.81   10.58
  -8   2  -1  432.06   17.71
  -8  -2  -1  435.48   18.20
  -8   2  -2  425.61   17.92
  -8  -2  -2  391.87   17.58
  -8   2  -3  568.35   21.82
  -8  -2  -3  563.29   21.97
  -8   2  -4   -5.58    4.50
  -8  -2  -4   -2.33    4.19
  -8  -2  -5    2.54    3.97
  -8   2  -5    5.22    3.67
  -8  -2  -6    0.89    4.17
  -8   2  -6    5.04    4.48
  -8  -2  -7   70.59    8.95
  -8   2  -7   66.90    8.58
  -8  -2  -8   68.52    9.02
  -8   2  -8   80.00    9.52
  -8   2  -9  125.63   11.60
  -8  -2  -9  142.82   12.35
  -8  -2 -10   65.70    8.41
  -8   2 -10   49.69    7.96
  -8  -2 -11  205.21   15.24
  -8  -2 -12  136.05   12.81
  -8  -2 -13  208.12   15.86
  -8   2 -13  206.20   16.28
  -8  -2 -13  209.44   16.10
   8  -3 -16    7.37    5.05
   8   3 -15  155.19   14.35
   8  -3 -15  163.43   13.75
   8   3 -14   -0.18    4.12
   8  -3 -14   22.22    6.69
   8   3 -13    9.85    5.31
   8  -3 -13    6.08    4.96
   8   3 -12    6.93    4.83
   8  -3 -12    7.52    4.86
   8   3 -11    5.99    4.41
   8  -3 -11   -3.56    4.61
   8   3 -10   10.33    4.45
   8  -3 -10    5.37    4.11
  -8  -3   9  899.18   26.28
   8   3  -9  904.48   30.82
   8  -3  -9  882.52   29.83
  -8  -3   8   12.49    3.85
   8   3  -8   22.87    5.48
   8  -3  -8   17.39    4.63
  -8  -3   7  713.11   22.81
   8   3  -7  730.37   26.10
   8  -3  -7  688.70   24.89
  -8  -3   6   17.08    3.92
   8   3  -6   11.65    3.90
   8  -3  -6   16.57    4.58
  -8   3   6   11.97    2.96
  -8  -3   5  750.50   23.92
   8   3  -5  771.03   26.13
   8  -3  -5  765.93   25.55
  -8   3   5  751.13   21.57
  -8  -3   4   39.32    5.50
   8   3  -4   42.84    6.28
   8  -3  -4   39.18    5.78
  -8   3   4   45.88    4.88
  -8   3   3  650.74   20.72
  -8  -3   3  705.30   23.00
   8   3  -3  626.17   22.83
   8  -3  -3  664.64   23.41
  -8   3   2   50.77    5.48
   8   3  -2   54.10    7.00
  -8  -3   2   40.96    5.72
   8  -3  -2   40.87    5.99
  -8   3   1   76.64    7.04
  -8  -3   1  100.54    8.22
   8   3  -1  106.33    8.88
   8  -3  -1   85.43    8.12
  -8  -3   0    6.78    3.27
   8   3   0    5.23    3.66
  -8   3   0    5.17    3.59
  -8   3  -1  104.02    8.39
  -8  -3  -1  106.70    9.04
  -8  -3  -2    3.11    3.36
  -8   3  -2    7.10    4.01
  -8   3  -3  555.80   21.56
  -8  -3  -3  533.73   21.40
  -8   3  -4   10.51    3.88
  -8  -3  -4    7.94    4.44
  -8  -3  -5  409.48   18.88
  -8   3  -5  347.42   17.65
  -8   3  -6  334.63   17.70
  -8  -3  -6  351.66   17.98
  -8   3  -7  869.65   30.96
  -8  -3  -7  922.83   31.95
  -8  -3  -8   25.99    6.07
  -8   3  -8   31.73    6.48
  -8  -3  -9  491.82   23.06
  -8   3  -9  472.74   22.83
  -8   3 -10    1.77    4.71
  -8  -3 -10   12.63    5.64
  -8  -3 -11  131.14   12.27
  -8  -3 -12   -0.06    3.87
  -8  -3 -13   20.16    6.78
  -8  -3 -13   13.89    5.80
  -8   3 -13   15.17    6.27
   8  -4 -16    0.24    4.05
   8   4 -15  185.80   15.37
   8  -4 -15  150.82   13.22
   8   4 -14  104.87   11.67
   8  -4 -14  103.48   10.90
   8   4 -13  740.38   30.42
   8  -4 -13  753.41   29.17
   8   4 -12  103.51   10.82
   8  -4 -12  116.16   10.78
   8   4 -11  141.46   12.30
   8  -4 -11  128.62   11.00
  -8  -4  10    5.54    3.52
   8   4 -10    3.52    4.25
   8  -4 -10    3.21    3.68
  -8  -4   9  293.25   14.01
   8   4  -9  281.60   16.31
   8  -4  -9  308.00   16.15
  -8  -4   8   89.58    7.67
   8  -4  -8  112.05    9.73
   8   4  -8   99.03    9.54
  -8  -4   7   29.26    4.91
   8   4  -7   46.78    7.06
   8  -4  -7   32.69    5.62
  -8  -4   6  236.03   12.36
  -8   4   6  237.33   10.13
   8   4  -6  219.38   13.36
   8  -4  -6  219.38   13.07
  -8   4   5   11.06    2.82
  -8  -4   5    9.74    3.50
   8   4  -5   17.19    4.92
   8  -4  -5   14.79    4.72
  -8  -4   4  139.06    9.62
  -8   4   4  134.29    8.17
   8   4  -4  146.05   10.43
   8  -4  -4  154.11   10.51
  -8  -4   3  503.13   19.25
  -8   4   3  457.36   16.63
   8   4  -3  441.02   18.74
   8  -4  -3  476.71   19.21
  -8   4   2    8.23    3.37
  -8  -4   2    0.29    3.01
   8   4  -2   -3.81    3.72
   8  -4  -2    1.08    3.15
  -8  -4   1  451.52   18.68
  -8   4   1  458.67   17.49
   8   4  -1  491.58   19.24
  -8  -4   0  160.64   10.77
  -8   4   0  150.53    9.75
   8   4   0  151.35   10.53
  -8  -4  -1 1170.60   33.79
  -8   4  -1 1147.30   32.48
  -8  -4  -2    2.12    3.95
  -8   4  -2   10.20    4.40
  -8  -4  -3  339.34   16.80
  -8   4  -3  321.46   15.94
  -8  -4  -4   13.35    4.52
  -8   4  -4    2.97    3.84
  -8   4  -5    2.68    3.87
  -8  -4  -5    4.07    4.12
  -8   4  -6   41.40    7.05
  -8  -4  -6   39.93    7.16
  -8   4  -7    7.78    5.27
  -8  -4  -7   13.66    5.60
  -8   4  -8   75.16    9.05
  -8  -4  -8   72.39    9.28
  -8  -4  -9  278.98   17.04
  -8   4  -9  250.29   16.52
  -8  -4 -10   -0.21    4.17
  -8  -4 -11   76.63    9.44
  -8  -4 -12  108.41   11.58
  -8  -4 -13  460.78   24.20
  -8  -4 -13  463.40   23.43
  -8  -4 -14   63.41    8.96
   8  -5 -16   50.47    8.39
   8   5 -15  324.61   20.60
   8  -5 -15  295.32   18.32
   8   5 -14   60.88    9.37
   8  -5 -14   66.95    8.94
   8   5 -13    8.24    5.89
   8  -5 -13    1.07    3.88
   8   5 -12   85.61   10.41
   8  -5 -12   73.60    8.66
   8   5 -11   60.31    8.15
   8  -5 -11   58.73    7.74
  -8  -5  10   -2.76    3.48
   8   5 -10    1.09    4.24
   8  -5 -10    2.81    3.33
  -8  -5   9   29.95    5.19
   8   5  -9   26.78    6.19
   8  -5  -9   21.09    5.12
  -8  -5   8  217.79   12.43
   8   5  -8  219.06   13.95
   8  -5  -8  223.74   13.38
  -8  -5   7  233.48   12.62
   8   5  -7  223.61   13.81
   8  -5  -7  226.21   13.21
  -8  -5   6  243.74   12.95
   8   5  -6  230.69   13.90
   8  -5  -6  241.00   13.52
  -8  -5   5   75.29    7.32
  -8   5   5   71.81    5.61
   8   5  -5   67.80    7.43
   8  -5  -5   78.21    7.82
  -8  -5   4  280.04   14.00
   8   5  -4  270.45   14.40
  -8   5   4  275.45   11.73
   8  -5  -4  257.24   13.87
  -8  -5   3  169.66   10.96
   8   5  -3  154.03   10.99
  -8   5   3  151.10    8.99
   8  -5  -3  161.12   10.74
  -8  -5   2  365.74   16.42
   8   5  -2  318.44   15.40
  -8   5   2  317.13   13.65
   8  -5  -2  302.11   15.06
  -8   5   1   27.73    4.77
  -8  -5   1   24.84    5.58
   8   5  -1   24.49    4.91
  -8   5   0   43.00    5.46
   8   5   0   47.71    6.40
  -8  -5   0   40.68    6.46
  -8   5  -1   29.35    5.37
   8   5   1   39.91    6.06
  -8  -5  -1   25.00    5.49
  -8  -5  -2  105.50    9.48
  -8   5  -2  109.73    8.96
  -8  -5  -3   68.11    7.77
  -8   5  -3   57.91    6.91
  -8   5  -4  377.28   18.11
  -8  -5  -4  427.95   19.37
  -8  -5  -5    9.46    4.36
  -8   5  -5   13.94    4.94
  -8   5  -6  768.98   28.06
  -8  -5  -6  721.77   27.38
  -8  -5  -7  497.73   22.53
  -8   5  -7  503.06   22.61
  -8  -5  -8  446.33   21.53
  -8  -5  -9    0.09    4.22
  -8  -5 -10   19.09    5.23
  -8  -5 -11  111.27   11.66
  -8  -5 -12   39.07    7.80
  -8  -5 -13    2.10    4.31
  -8  -5 -13    1.76    4.55
   8   6 -15    0.33    4.36
   8  -6 -15    0.30    3.68
   8   6 -14  616.81   28.54
   8  -6 -14  591.34   25.73
   8   6 -13  236.81   16.54
   8  -6 -13  215.11   14.81
   8   6 -12  310.10   18.64
   8  -6 -12  328.89   17.76
  -8  -6  11   -1.83    3.89
   8   6 -11   -1.13    4.61
   8  -6 -11    8.62    4.22
   8   6 -10  285.92   17.08
   8  -6 -10  309.89   16.37
  -8  -6  10  303.97   15.26
   8   6  -9  157.27   12.36
   8  -6  -9  164.92   11.68
  -8  -6   9  156.58   10.76
  -8  -6   8   14.20    4.30
   8   6  -8   12.35    5.05
   8  -6  -8    5.97    4.05
  -8  -6   7   25.12    5.13
   8   6  -7   30.78    6.14
   8  -6  -7   16.12    4.56
  -8  -6   6   22.14    4.66
   8   6  -6   22.01    5.19
   8  -6  -6   17.43    4.45
  -8  -6   5   -0.13    3.22
   8   6  -5   -2.76    4.11
  -8   6   5    0.46    1.93
   8  -6  -5    2.29    3.50
  -8  -6   4   75.66    7.70
   8   6  -4   66.26    7.74
  -8   6   4   63.85    5.56
   8  -6  -4   74.44    7.60
  -8  -6   3   86.60    8.01
   8   6  -3   71.77    7.55
   8  -6  -3   66.42    7.30
  -8   6   3   83.98    6.57
  -8  -6   2 1514.43   40.52
   8   6  -2 1558.40   40.31
  -8   6   2 1533.86   37.39
  -8  -6   1   -3.86    3.92
   8   6  -1   -1.34    3.73
  -8   6   1    0.78    2.89
  -8   6   0  499.46   18.75
  -8  -6   0  503.22   20.72
   8   6   0  526.98   20.03
  -8   6  -1   44.57    5.82
  -8  -6  -1   36.79    6.08
   8   6   1   37.39    5.68
  -8   6  -2 1116.90   32.90
  -8  -6  -2 1169.68   34.80
  -8  -6  -3    3.89    4.04
  -8   6  -3    3.66    3.92
  -8   6  -4   40.33    6.44
  -8  -6  -4   37.33    6.57
  -8  -6  -5  105.68   10.09
  -8   6  -5  121.73   10.54
  -8   6  -6   47.63    7.45
  -8  -6  -6   36.62    6.60
  -8  -6  -7   13.61    5.53
  -8  -6  -8   34.30    6.84
  -8  -6  -9   41.06    7.60
  -8  -6 -10  242.93   17.48
  -8  -6 -11    7.59    5.04
  -8   6 -12  314.72   20.22
  -8  -6 -12  301.93   19.34
  -8  -6 -13  134.39   13.07
   8   7 -14   10.51    6.42
   8  -7 -14   12.05    4.59
   8   7 -13   17.17    5.66
   8  -7 -13   15.45    5.49
   8   7 -12   62.36    8.86
   8  -7 -12   67.77    8.44
  -8  -7  11   14.23    4.72
   8   7 -11   17.69    6.19
   8  -7 -11   18.87    5.14
   8   7 -10  208.83   14.66
   8  -7 -10  225.64   13.76
  -8  -7  10  223.12   13.24
  -8  -7   9    2.25    3.49
   8   7  -9   15.33    5.96
   8  -7  -9   10.71    4.32
   8   7  -8  995.69   32.94
   8  -7  -8  981.91   30.84
  -8  -7   8  991.66   30.83
  -8  -7   7    4.57    3.83
   8   7  -7    4.65    4.51
   8  -7  -7    6.15    3.87
  -8  -7   6  205.03   12.53
   8   7  -6  224.01   13.82
   8  -7  -6  202.19   12.33
  -8  -7   5   79.52    7.94
   8   7  -5   68.21    7.50
   8  -7  -5  100.51    8.52
  -8  -7   4 1384.86   37.86
   8   7  -4 1397.68   31.21
   8   7  -4 1393.21   38.37
  -8   7   4 1354.90   32.55
   8  -7  -4 1341.98   37.03
  -8  -7   3   32.19    5.56
   8   7  -3   37.76    6.18
  -8   7   3   43.09    4.80
   8  -7  -3   58.07    7.05
  -8  -7   2   15.01    4.87
  -8   7   2    3.22    3.07
   8   7  -2    3.22    3.44
  -8  -7   1   10.65    4.61
  -8   7   1   13.55    3.76
   8   7  -1    6.36    3.54
  -8  -7   0    9.78    4.55
   8   7   0   15.86    4.59
  -8   7   0   14.27    4.01
  -8   7  -1    3.19    2.99
  -8  -7  -1   -1.77    3.46
   8   7   1   -1.31    3.75
  -8   7  -2   80.89    8.10
  -8  -7  -2   80.72    8.96
  -8  -7  -3   67.35    7.98
  -8   7  -3   59.81    7.18
  -8   7  -4 1115.70   34.56
  -8  -7  -4 1153.32   35.73
  -8  -7  -5   28.73    6.50
  -8  -7  -6  486.55   21.95
  -8  -7  -7    8.26    5.63
  -8  -7  -8 1110.70   36.86
  -8  -7  -9   10.68    5.08
  -8  -7 -10  157.34   13.43
  -8  -7 -11   12.07    4.97
  -8  -7 -12   11.23    5.89
  -8   7 -12    8.91    5.53
  -8  -7 -13   10.67    5.11
   8   8 -14  212.15   16.59
   8   8 -13  318.01   19.74
   8  -8 -13  314.36   17.57
   8   8 -12  243.03   16.67
   8  -8 -12  228.01   14.45
   8   8 -11  114.29   11.53
   8  -8 -11  101.90    9.75
  -8  -8  11  105.03    9.66
   8   8 -10  806.95   30.36
   8  -8 -10  801.05   27.78
  -8  -8  10  789.05   27.61
   8   8  -9  113.33   10.86
   8  -8  -9  132.45   10.38
  -8  -8   9  130.26   10.51
  -8  -8   8   10.79    4.77
   8   8  -8    8.74    4.86
   8  -8  -8    2.52    3.77
  -8  -8   7    5.88    3.57
   8   8  -7    2.20    4.13
   8  -8  -7   13.77    4.63
  -8  -8   6    2.78    3.14
   8   8  -6    8.25    4.38
   8  -8  -6    7.23    3.48
  -8  -8   5   -1.31    3.83
   8   8  -5    3.81    2.32
   8   8  -5    4.12    3.60
   8  -8  -5   -2.13    3.65
   8   8  -4   60.30    5.16
  -8  -8   4   65.43    7.80
   8   8  -4   66.72    7.58
   8  -8  -4   57.65    7.14
  -8  -8   3  196.16   12.58
   8   8  -3  192.17   12.09
  -8  -8   2 1010.67   31.34
  -8   8   2  944.72   27.00
   8   8  -2  992.45   30.02
  -8   8   1  476.12   17.99
  -8  -8   1  474.28   20.24
   8   8  -1  463.51   19.01
  -8  -8   0   95.18    9.26
   8   8   0   86.91    7.90
  -8   8   0  105.91    8.41
  -8  -8  -1  376.79   18.27
   8   8   1  357.33   16.24
  -8  -8  -2 1277.20   37.96
  -8  -8  -3  108.60   10.18
  -8  -8  -4   65.20    8.43
  -8  -8  -5   65.99    8.38
  -8  -8  -6   37.06    7.02
  -8  -8  -7   21.06    5.73
  -8  -8  -8   25.09    6.80
  -8  -8  -9   52.37    7.86
  -8  -8 -10  205.51   15.21
  -8  -8 -11   61.55    8.82
  -8  -8 -12  216.93   16.27
  -8  -8 -13  230.43   16.85
   8   9 -14   12.96    5.84
   8   9 -13   63.58    9.58
   8   9 -12   -0.94    4.42
   8   9 -11  155.65   13.03
   8  -9 -11  137.40   10.93
   8   9 -10   -3.07    4.45
   8  -9 -10    3.46    3.99
  -8  -9  10    3.89    4.09
   8   9  -9  111.22   10.69
   8  -9  -9  109.15    9.41
  -8  -9   9  102.96    9.75
   8   9  -8  221.51   14.34
   8  -9  -8  198.50   12.63
  -8  -9   8  199.85   13.18
   8   9  -7 1171.48   35.95
   8  -9  -7 1146.08   33.49
  -8  -9   7 1123.22   34.78
  -8  -9   6    7.60    4.25
   8   9  -6    7.86    2.67
   8   9  -6    6.12    3.86
   8  -9  -6    4.37    3.29
  -8  -9   5  499.04   20.98
   8   9  -5  482.91   20.47
   8   9  -5  503.87   16.74
   8  -9  -5  472.50   19.44
  -8  -9   4  239.39   14.33
   8   9  -4  255.30   11.18
   8   9  -4  247.83   14.02
  -8  -9   3  444.95   19.78
   8   9  -3  441.83   15.25
   8   9  -3  423.04   18.58
  -8  -9   2    5.53    4.36
   8   9  -2   11.32    4.24
  -8  -9   1  147.92   11.37
   8   9  -1  164.88   10.99
  -8  -9   0  170.31   12.35
   8   9   0  171.29   10.90
  -8  -9  -1   77.72    8.79
   8   9   1   74.90    7.68
  -8  -9  -2   26.98    6.17
  -8  -9  -3  353.75   18.38
  -8  -9  -4  363.30   18.83
  -8  -9  -5  332.74   18.30
  -8  -9  -6   42.12    7.28
  -8  -9  -7  966.14   33.85
  -8  -9  -8  175.89   13.68
  -8  -9  -9   64.56    9.02
  -8  -9 -10    5.79    4.21
  -8  -9 -11  118.74   12.08
  -8  -9 -12   24.26    6.89
   8  10 -14   -5.96    5.88
   8  10 -13  700.64   30.72
   8  10 -12   -0.55    3.93
   8  10 -11  134.24   12.46
   8  10 -10   -0.97    4.92
   8 -10 -10    2.72    3.62
   8  10  -9  570.07   24.91
   8 -10  -9  616.05   23.10
  -8 -10   9  592.36   24.27
  -8 -10   8   10.33    4.54
   8  10  -8    7.19    4.29
   8 -10  -8    2.99    3.22
  -8 -10   7    5.50    4.12
   8  10  -7    5.92    4.77
   8  10  -7   -2.41    2.63
   8 -10  -7    1.69    3.05
  -8 -10   6   51.45    7.20
   8  10  -6   55.46    5.79
   8  10  -6   47.71    6.90
   8 -10  -6   43.41    5.96
  -8 -10   5  108.08   10.09
   8  10  -5  145.85   10.94
   8  10  -5  122.06    8.13
   8 -10  -5  142.15   10.22
  -8 -10   4   35.72    6.57
   8  10  -4   48.27    5.39
   8  10  -4   49.02    6.68
  -8 -10   3  415.18   19.55
   8  10  -3  414.03   15.56
   8  10  -3  425.93   18.58
  -8 -10   2   -1.83    3.82
   8  10  -2    3.82    3.74
  -8 -10   1 1353.58   39.04
   8  10  -1 1275.32   35.95
  -8 -10   0    0.34    4.23
   8  10   0    2.43    3.17
  -8 -10  -1 1703.68   47.39
   8  10   1 1830.49   44.50
  -8 -10  -2   55.88    8.00
  -8 -10  -3  657.39   26.29
  -8 -10  -4    6.97    4.58
  -8 -10  -5  192.44   13.99
  -8 -10  -6   21.32    5.45
  -8 -10  -7    2.19    4.51
  -8 -10  -8   28.83    6.45
  -8 -10  -9  168.34   13.61
  -8 -10 -10   24.41    6.37
  -8  10 -11   74.46   10.38
  -8 -10 -11   64.30    9.63
  -8 -10 -12    3.43    4.75
   8  11 -13   31.47    7.84
   8  11 -12   67.00    9.65
   8  11 -11    3.95    5.02
   8  11 -10   63.93    8.67
   8  11  -9  164.57   13.08
   8  11  -8  118.24   10.91
   8 -11  -8  133.52   10.07
  -8 -11   8  134.38   11.37
   8  11  -7  420.62   20.21
   8  11  -7  451.86   17.42
   8 -11  -7  440.21   18.61
  -8 -11   7  432.71   20.50
  -8 -11   6    0.01    4.35
   8  11  -6   18.26    4.03
   8  11  -6   11.45    4.38
   8 -11  -6    4.63    3.03
   8  11  -5  283.90   15.62
   8  11  -5  308.60   13.65
  -8 -11   5  296.43   16.80
  -8 -11   4  396.20   19.19
   8  11  -4  386.63   15.45
   8  11  -4  369.66   17.58
  -8 -11   3  544.59   23.32
   8  11  -3  592.41   19.68
   8  11  -3  577.77   22.02
  -8 -11   2   16.09    5.71
   8  11  -2    9.44    3.77
  -8 -11   1    6.54    4.62
   8  11  -1    7.90    3.63
  -8 -11   0   17.85    5.44
   8  11   0   21.83    4.68
  -8 -11  -1   51.96    7.88
   8  11   1   65.30    6.99
  -8 -11  -2   18.04    5.63
  -8 -11  -3  233.41   15.32
  -8 -11  -4  220.55   14.97
  -8 -11  -5  170.79   13.36
  -8 -11  -6   31.43    6.76
  -8 -11  -7  548.14   24.79
  -8 -11  -8   93.08   10.41
  -8 -11  -9  171.00   14.05
  -8 -11 -10   77.02   10.17
  -8 -11 -11  119.36   12.25
  -8 -11 -12   16.47    6.68
   8  12 -13   39.00    8.50
   8  12 -12  316.73   19.80
   8  12 -11   22.37    6.42
   8  12 -10  386.69   20.81
   8  12  -9  137.01   12.11
   8  12  -8   19.62    5.71
  -8 -12   8   12.29    5.81
  -8 -12   7    9.97    4.96
   8  12  -7   18.32    5.60
   8  12  -7    8.62    3.77
  -8 -12   6   -5.61    4.97
   8  12  -6    2.99    3.05
   8  12  -6    3.09    4.66
  -8 -12   5   33.34    6.47
   8  12  -5   29.39    4.84
   8  12  -5   24.58    5.42
  -8 -12   4   43.51    7.37
   8  12  -4   48.04    5.87
   8  12  -4   29.58    5.66
  -8 -12   3  391.16   19.81
   8  12  -3  412.36   16.50
   8  12  -3  370.88   17.36
  -8 -12   2  343.31   18.31
   8  12  -2  360.23   16.78
  -8 -12   1   30.13    6.26
   8  12  -1   27.04    4.92
  -8 -12   0  268.15   16.17
   8  12   0  267.10   13.97
  -8 -12  -1   57.74    8.28
  -8 -12  -2 1152.43   37.39
  -8 -12  -3  121.46   11.37
  -8 -12  -4   90.09    9.93
  -8 -12  -5    5.44    4.76
  -8 -12  -6    6.52    5.51
  -8 -12  -7   66.85    9.30
  -8 -12  -8    4.71    5.43
  -8 -12  -9   21.32    6.67
  -8 -12 -10  232.15   16.70
  -8  12 -10  204.51   16.50
  -8 -12 -11   40.52    8.22
   8  13 -12   14.77    5.24
   8  13 -11    8.89    5.05
   8  13 -10   18.34    6.56
   8  13  -9   47.09    7.92
   8  13  -8  454.12   21.79
   8  13  -8  467.82   19.35
  -8 -13   8  443.22   22.10
  -8 -13   7   46.22    7.77
   8  13  -7   68.31    8.61
   8  13  -7   58.88    7.02
   8  13  -6  388.41   19.18
   8  13  -6  391.99   16.99
  -8 -13   6  358.83   19.41
  -8 -13   5   32.31    6.67
   8  13  -5   24.60    4.74
   8  13  -5   32.42    5.70
   8  13  -4  701.48   23.65
   8  13  -4  658.99   24.80
  -8 -13   4  703.81   27.84
  -8 -13   3  130.31   11.74
   8  13  -3  135.02    9.56
   8  13  -3  130.97   10.11
  -8 -13   2   38.15    6.75
   8  13  -2   40.78    6.14
  -8 -13   1   62.74    8.62
   8  13  -1   48.63    6.36
  -8 -13   0    5.66    4.86
   8  13   0   20.64    4.86
  -8 -13  -1   32.07    6.73
  -8 -13  -2   21.59    6.73
  -8 -13  -3   97.70   10.66
  -8 -13  -4  233.74   16.01
  -8 -13  -5   -0.50    4.48
  -8 -13  -6  422.75   21.80
  -8 -13  -7   -2.46    4.24
  -8 -13  -8  865.64   33.18
  -8 -13  -9    8.09    5.29
  -8  13 -10   87.88   11.56
  -8 -13 -10  103.37   11.55
  -8 -13 -11    8.84    5.11
   8  14 -12   67.50    9.95
   8  14 -11   50.16    8.53
   8  14 -10   19.36    6.26
   8  14  -9   54.96    8.14
   8  14  -8  130.77   11.88
   8  14  -8  139.33   10.77
   8  14  -7   50.88    6.80
   8  14  -7   40.83    7.02
  -8 -14   7   49.34    8.51
  -8 -14   6   12.45    5.23
   8  14  -6    3.44    3.57
   8  14  -6    5.24    4.31
  -8 -14   5    8.03    5.19
   8  14  -5   11.99    3.75
   8  14  -5   10.57    4.36
  -8 -14   4   20.63    6.06
   8  14  -4   20.13    5.11
   8  14  -4   19.75    5.21
  -8 -14   3   11.81    4.89
   8  14  -3   25.13    5.23
   8  14  -3   25.34    5.56
  -8 -14   2  212.83   15.04
   8  14  -2  232.48   13.29
  -8 -14   1   95.52    9.99
   8  14  -1   95.45    8.36
  -8 -14   0  302.33   17.78
  -8 -14  -1   37.93    7.57
  -8 -14  -2  418.54   21.43
  -8 -14  -3    5.56    4.31
  -8 -14  -4   77.35    9.68
  -8 -14  -5   58.79    8.62
  -8 -14  -6  161.12   13.73
  -8 -14  -7   70.26    9.46
  -8 -14  -8  121.12   12.22
  -8  14  -9   44.25    8.67
  -8 -14  -9   26.09    6.74
  -8 -14 -10   34.90    7.46
   8  15 -12   62.00    9.74
   8  15 -11   -3.79    5.08
   8  15 -10    5.42    4.29
   8  15  -9   47.88    7.66
   8  15  -8  192.10   14.11
   8  15  -8  188.93   13.04
   8  15  -7  310.78   17.56
   8  15  -7  275.13   15.29
  -8 -15   7  274.24   17.90
   8  15  -6  141.82   11.73
   8  15  -6  157.45   11.40
  -8 -15   6  161.58   13.78
   8  15  -5  225.45   13.60
   8  15  -5  240.80   14.64
  -8 -15   5  214.11   15.52
  -8 -15   4  120.39   11.71
   8  15  -4  128.73   10.06
   8  15  -4  128.36   10.41
  -8 -15   3  128.75   12.25
   8  15  -3  122.23    9.87
  -8 -15   2  128.81   11.98
  -8 -15   1   -4.25    5.24
  -8 -15   0   -3.14    4.62
  -8 -15  -1   -1.25    3.93
  -8 -15  -2  123.35   11.97
  -8 -15  -3   68.69    9.29
  -8 -15  -4   69.23    9.69
  -8 -15  -5  139.02   13.01
  -8 -15  -6  285.64   18.51
  -8 -15  -7  238.15   17.03
  -8  15  -8  236.73   17.12
  -8 -15  -8  236.12   16.97
  -8 -15  -9  115.11   12.07
  -8  15  -9  105.60   11.98
   8  16 -11  193.43   15.62
   8  16 -10   -1.34    5.07
   8  16  -9  101.96   10.66
   8  16  -8    3.77    4.85
   8  16  -8    3.13    4.12
   8  16  -7   25.65    6.03
   8  16  -7   30.49    6.24
  -8 -16   7   32.17    7.26
  -8 -16   6   43.07    8.03
   8  16  -6   27.91    5.88
   8  16  -6   32.82    6.40
  -8 -16   5   37.69    8.24
   8  16  -5   34.87    6.32
  -8 -16   4   11.14    5.04
   8  16  -4    2.87    3.60
   8  16  -3  230.82   13.96
  -8 -16   3  255.17   17.16
  -8 -16   2   21.76    6.64
  -8 -16   1  182.52   14.38
  -8 -16   0   21.05    6.46
  -8 -16  -1  241.80   16.93
  -8 -16  -2   49.15    8.60
  -8 -16  -3  352.63   20.72
  -8 -16  -4   -0.93    4.07
  -8 -16  -5   -6.81    5.98
  -8 -16  -6   -1.02    4.74
  -8 -16  -7   22.87    7.00
  -8 -16  -8   58.79    9.14
  -8  16  -8   62.78    9.47
   8  17 -11   10.37    6.22
   8  17 -10    5.58    4.45
   8  17  -9  311.49   18.88
   8  17  -8   -1.19    4.24
   8  17  -7  191.77   13.53
  -8 -17   7  208.81   16.10
  -8 -17   6   89.45   10.86
   8  17  -6   91.20    9.55
   8  17  -5  287.44   16.40
  -8 -17   5  316.01   19.71
  -8 -17   4   10.77    5.58
   8  17  -4    2.03    3.97
   8  17  -3  350.67   18.15
  -8 -17   3  346.25   20.60
  -8 -17   2    0.45    4.68
  -8 -17   1    2.80    4.65
  -8 -17   0   16.24    6.48
  -8 -17  -1   29.50    6.86
  -8 -17  -2    1.29    3.95
  -8 -17  -3  418.27   22.97
  -8 -17  -4   25.02    7.44
  -8 -17  -5  177.36   14.96
  -8 -17  -6   -4.57    5.34
  -8 -17  -7  349.15   21.12
  -8  17  -7  313.74   19.53
  -8  17  -8   -0.41    4.85
   8  18  -7    4.91    4.42
  -8 -18   7    4.83    5.41
  -8 -18   6  -11.91    6.18
   8  18  -6    3.52    4.04
  -8 -18   5    9.55    5.00
   8  18  -5   14.65    5.61
  -8 -18   4   -1.51    4.21
   8  18  -4   -0.79    3.82
  -8 -18   3  235.04   17.36
  -8 -18   2   17.16    6.20
  -8 -18   1  131.68   13.23
  -8 -18   0  198.78   15.57
  -8 -18  -1  278.38   18.59
  -8 -18  -2   34.63    7.33
  -8 -18  -3  158.92   14.35
  -8 -18  -4    8.13    4.70
  -8 -18  -5    1.15    5.02
  -8 -18  -6   33.04    7.06
   8  19  -7   21.83    5.46
   8  19  -6  291.62   17.57
  -8 -19   5   15.62    6.41
   8  19  -5   26.52    6.19
   8  19  -4  250.32   16.04
  -8 -19   4  224.56   17.32
  -8 -19   3   13.35    5.81
  -8 -19   2  242.30   17.74
  -8 -19   1    6.37    6.07
  -8 -19   0   11.44    5.41
  -8 -19  -1    0.36    4.70
  -8 -19  -2   42.56    8.48
  -8 -19  -3   48.20    8.67
   8  20  -6    3.45    4.60
   8  20  -5   14.11    4.93
   8  20  -4   60.32    8.68
   9   0 -15  368.64   21.80
   9   0 -14   -3.21    5.01
   9   0 -13  389.98   21.54
   9   0 -12   -1.94    4.54
   9   0 -11  652.75   27.15
   9   0 -10   -0.41    3.76
   9   0  -9  233.92   15.35
   9   0  -8    7.66    5.23
  -9   0   7    5.91    3.41
   9   0  -7    0.64    4.63
  -9   0   6   -2.67    3.02
   9   0  -6   -1.96    4.38
   9   0  -5  159.87   12.00
  -9   0   5  141.39    9.61
  -9   0   4    0.51    2.92
   9   0  -4   -2.34    4.02
   9   0  -3 1238.47   36.52
  -9   0   3 1284.42   34.61
  -9   0   2    0.80    2.96
   9   0  -2   -2.59    4.43
  -9   0   1   91.58    8.48
   9   0  -1   84.28    8.52
  -9   0   0    2.82    3.62
  -9   0  -1 1019.01   31.73
  -9   0  -2   -2.87    4.50
  -9   0  -3  512.32   21.79
  -9   0  -4   -5.25    5.05
  -9   0  -5   52.73    7.47
  -9   0  -6   -4.85    4.99
  -9   0  -7  183.53   14.02
  -9   0  -8   -3.58    4.97
  -9   0  -9  172.55   14.24
  -9   0 -10   -2.21    4.78
  -9   0 -11   41.89    7.94
  -9   0 -12    1.45    4.78
   9   1 -15  188.87   15.71
   9  -1 -15  200.13   16.04
   9   1 -14   53.45    9.41
   9  -1 -14   46.98    8.66
   9   1 -13   31.19    7.16
   9  -1 -13   27.60    6.86
   9   1 -12   18.01    6.10
   9  -1 -12   18.09    5.63
   9   1 -11    0.69    4.48
   9  -1 -11   11.16    5.34
   9   1 -10   13.26    4.95
   9  -1 -10    6.46    4.59
   9   1  -9  810.11   30.04
   9  -1  -9  805.71   29.64
  -9  -1   8  432.25   17.03
   9   1  -8  463.29   21.20
   9  -1  -8  423.89   20.38
  -9  -1   7  907.73   27.13
   9   1  -7  914.38   31.16
   9  -1  -7  899.40   30.71
  -9   1   7  941.24   26.25
  -9  -1   6  362.16   15.67
   9   1  -6  357.95   17.96
   9  -1  -6  386.35   18.36
  -9   1   6  356.44   14.91
  -9  -1   5 1703.22   41.66
   9   1  -5 1648.77   44.86
   9  -1  -5 1588.49   44.11
  -9   1   5 1661.85   40.20
  -9  -1   4  144.54    9.94
   9   1  -4  153.28   11.55
   9  -1  -4  154.66   11.61
  -9   1   4  151.60    9.82
  -9  -1   3  390.33   17.06
   9   1  -3  407.44   18.84
   9  -1  -3  405.90   18.58
  -9   1   3  416.70   16.99
  -9  -1   2   93.55    8.38
  -9   1   2   76.97    7.65
   9   1  -2   97.90    9.13
   9  -1  -2   78.68    8.33
  -9  -1   1   19.72    4.49
  -9   1   1   16.88    4.11
   9   1  -1   28.61    5.76
   9  -1  -1   22.79    5.49
  -9  -1   0   51.53    6.84
  -9   1   0   56.57    6.86
  -9   1  -1   58.37    7.41
  -9  -1  -1   57.24    7.35
  -9   1  -2  103.55    9.50
  -9  -1  -2  109.87    9.81
  -9  -1  -3  669.92   25.53
  -9   1  -3  686.27   25.76
  -9  -1  -4  167.36   12.32
  -9   1  -4  148.68   11.86
  -9   1  -5  116.09   10.78
  -9  -1  -5   93.66    9.77
  -9  -1  -6  653.60   26.72
  -9   1  -6  642.72   26.35
  -9  -1  -7  700.39   28.33
  -9   1  -7  752.95   29.26
  -9  -1  -8   76.60    9.74
  -9   1  -8   74.86    9.48
  -9   1  -9  200.07   15.21
  -9  -1  -9  207.30   15.42
  -9   1 -10   20.21    6.08
  -9  -1 -10   18.01    5.82
  -9   1 -11    8.11    4.48
  -9  -1 -11   16.56    5.82
  -9  -1 -12   38.36    8.32
   9  -2 -15   91.89   11.05
   9   2 -14  782.38   32.50
   9  -2 -14  758.71   31.45
   9   2 -13  258.45   17.54
   9  -2 -13  228.97   16.25
   9   2 -12   87.02   10.30
   9  -2 -12  101.77   10.87
   9   2 -11   80.76    9.59
   9  -2 -11   94.96   10.41
   9   2 -10  268.07   16.64
   9  -2 -10  275.09   16.49
   9  -2  -9  104.94   10.21
   9   2  -9   97.99   10.12
  -9  -2   8  197.97   11.53
   9   2  -8  215.01   14.44
   9  -2  -8  194.56   13.58
   9   2  -7    3.87    3.98
   9  -2  -7    1.71    3.58
  -9  -2   7    4.01    2.99
  -9   2   6   58.26    5.88
   9   2  -6   54.47    7.54
   9  -2  -6   54.93    7.36
  -9  -2   6   51.51    6.36
  -9   2   5   44.20    5.39
   9   2  -5   63.98    8.03
   9  -2  -5   48.85    6.97
  -9  -2   5   62.92    6.94
  -9   2   4    3.60    3.26
   9  -2  -4   -0.20    4.03
  -9  -2   4    5.02    3.52
  -9  -2   3   72.08    7.36
   9   2  -3   70.75    8.06
  -9   2   3   80.76    7.35
   9  -2  -3   58.99    7.40
  -9   2   2  669.01   23.02
  -9  -2   2  672.45   23.96
   9   2  -2  734.63   25.73
   9  -2  -2  703.14   25.32
  -9   2   1  149.43   10.45
  -9  -2   1  146.65   10.58
   9   2  -1  152.01   11.16
   9  -2  -1  188.91   12.49
  -9   2   0  717.93   24.84
  -9  -2   0  715.21   25.36
   9   2   0  755.85   26.29
  -9   2  -1  298.48   15.53
  -9  -2  -1  277.31   15.27
  -9   2  -2  542.48   22.12
  -9  -2  -2  535.18   22.28
  -9  -2  -3   46.43    7.56
  -9   2  -3   47.03    6.83
  -9  -2  -4  230.77   14.76
  -9   2  -4  231.89   14.64
  -9  -2  -5   26.60    6.14
  -9   2  -5   32.06    6.57
  -9  -2  -6  104.91   10.72
  -9   2  -6   81.57    9.51
  -9  -2  -7    1.17    4.80
  -9   2  -7   -1.32    4.37
  -9   2  -8  127.48   12.26
  -9  -2  -8  139.78   12.51
  -9  -2  -9   19.95    6.14
  -9   2  -9   28.70    6.18
  -9  -2 -10   50.58    8.30
  -9   2 -10   39.07    7.76
  -9  -2 -11   34.41    7.44
  -9  -2 -12  465.53   25.01
   9  -3 -15   51.81    8.86
   9   3 -14  115.47   12.51
   9  -3 -14  124.34   12.45
   9   3 -13   -8.72    5.24
   9  -3 -13   -6.17    5.24
   9   3 -12   49.78    8.42
   9  -3 -12   63.17    8.46
   9   3 -11   54.34    8.41
   9  -3 -11   37.05    7.01
   9   3 -10   44.91    7.98
   9  -3 -10   50.35    7.31
   9   3  -9    1.38    4.15
  -9  -3   9    7.93    3.22
   9  -3  -9   -2.04    4.11
  -9  -3   8 1037.60   30.52
   9   3  -8 1080.90   35.18
   9  -3  -8 1076.34   34.39
  -9  -3   7  221.86   12.47
   9   3  -7  207.04   14.02
   9  -3  -7  210.46   13.62
  -9   3   6  474.23   16.71
  -9  -3   6  469.76   18.93
   9   3  -6  465.91   20.92
   9  -3  -6  461.51   20.45
   9   3  -5    7.68    4.56
  -9  -3   5    6.87    3.93
   9  -3  -5    1.29    3.84
  -9   3   5    4.28    3.39
  -9   3   4 1110.46   30.13
  -9  -3   4 1062.58   32.12
   9   3  -4 1118.24   34.34
   9  -3  -4 1145.38   34.34
  -9   3   3   37.71    4.96
   9   3  -3   26.26    5.40
   9  -3  -3   35.57    5.95
  -9  -3   3   37.30    6.03
  -9   3   2  302.70   14.49
  -9  -3   2  325.58   15.95
   9   3  -2  310.65   16.02
   9  -3  -2  311.13   16.14
  -9  -3   1   -0.65    3.87
  -9   3   1    2.31    3.51
   9   3  -1   -7.34    5.16
  -9  -3   0   48.04    7.13
  -9   3   0   33.94    5.76
   9   3   0   44.89    6.79
  -9  -3  -1    1.58    3.44
  -9   3  -1    3.93    3.81
  -9   3  -2  188.17   12.58
  -9  -3  -2  199.18   13.17
  -9   3  -3   57.58    7.70
  -9  -3  -3   67.37    8.20
  -9   3  -4  378.37   18.73
  -9  -3  -4  339.60   18.23
  -9  -3  -5   32.44    6.71
  -9   3  -5   42.54    7.25
  -9   3  -6  908.73   32.12
  -9  -3  -6  839.62   31.28
  -9   3  -7    0.56    4.44
  -9  -3  -7    2.11    4.51
  -9  -3  -8  383.34   20.94
  -9   3  -8  370.79   20.43
  -9  -3  -9   14.61    4.73
  -9   3  -9    9.92    5.45
  -9  -3 -10   99.02   11.04
  -9   3 -10  112.26   12.04
  -9  -3 -11   27.37    7.07
  -9  -3 -12  131.95   13.43
   9  -4 -15    3.44    4.29
   9   4 -14  520.74   26.54
   9  -4 -14  558.66   26.15
   9   4 -13   14.13    6.69
   9  -4 -13   18.61    5.79
   9   4 -12  353.81   20.42
   9  -4 -12  337.72   19.03
   9   4 -11   81.74    9.89
   9  -4 -11   86.71    9.46
   9   4 -10  759.23   29.37
   9  -4 -10  671.48   27.03
  -9  -4   9    7.70    3.71
   9   4  -9   18.64    6.26
   9  -4  -9    4.02    4.00
  -9  -4   8   95.88    8.52
   9  -4  -8  109.73   10.22
   9   4  -8  109.06   10.57
  -9  -4   7   12.04    4.01
   9   4  -7    0.15    4.64
   9  -4  -7    5.77    4.09
  -9  -4   6   48.70    6.50
   9   4  -6   45.40    7.30
   9  -4  -6   37.84    6.53
  -9   4   5   20.51    3.85
  -9  -4   5   32.88    5.77
   9   4  -5   26.79    5.50
   9  -4  -5   26.62    5.62
  -9  -4   4  188.25   11.99
  -9   4   4  162.54    9.81
   9   4  -4  169.54   12.26
   9  -4  -4  166.83   11.90
  -9  -4   3  283.03   15.21
  -9   4   3  303.17   13.86
   9   4  -3  313.40   16.09
   9  -4  -3  271.43   15.23
  -9  -4   2  793.98   27.28
  -9   4   2  790.68   25.23
   9   4  -2  826.42   28.13
   9  -4  -2  834.09   27.90
   9   4  -1   46.36    6.61
  -9   4   1   40.32    5.97
  -9  -4   1   27.83    5.52
  -9  -4   0  880.38   29.47
  -9   4   0  897.61   28.33
   9   4   0  890.94   29.33
  -9  -4  -1  394.40   18.71
  -9   4  -1  361.85   17.17
  -9  -4  -2 1359.16   39.46
  -9   4  -2 1354.83   38.43
  -9  -4  -3  103.94    9.88
  -9   4  -3   95.54    9.51
  -9  -4  -4   12.18    5.12
  -9   4  -4   14.33    5.16
  -9   4  -5   11.67    5.31
  -9  -4  -5   16.80    5.26
  -9  -4  -6  141.73   12.22
  -9   4  -6  124.15   11.46
  -9   4  -7   55.87    8.58
  -9  -4  -7   64.86    8.82
  -9  -4  -8   48.50    8.18
  -9   4  -8   41.26    7.98
  -9  -4  -9  146.63   13.19
  -9   4  -9  127.39   12.60
  -9  -4 -10   78.69   10.03
  -9  -4 -11  106.89   12.00
   9  -5 -15   44.91    7.92
   9   5 -14   20.44    6.75
   9  -5 -14   19.58    6.13
   9   5 -13    0.60    4.68
   9  -5 -13   -0.30    4.38
   9   5 -12   71.84    9.58
   9  -5 -12   69.14    8.93
   9   5 -11   -3.46    5.31
   9  -5 -11    6.19    3.90
  -9  -5  10   51.44    6.76
   9   5 -10   57.90    8.74
   9  -5 -10   50.87    7.51
  -9  -5   9  145.69   10.59
   9   5  -9  141.24   12.30
   9  -5  -9  136.87   11.59
  -9  -5   8  286.37   14.81
   9   5  -8  265.36   16.15
   9  -5  -8  278.26   15.80
  -9  -5   7   49.95    6.48
   9   5  -7   45.12    6.91
   9  -5  -7   43.01    6.76
  -9  -5   6   92.04    8.81
   9   5  -6  103.32    9.77
   9  -5  -6   95.20    9.23
  -9  -5   5  133.35   10.47
   9   5  -5  188.06   12.87
  -9   5   5  168.00    9.50
   9  -5  -5  144.06   11.05
  -9  -5   4  853.21   28.19
   9   5  -4  845.26   28.95
  -9   5   4  838.06   24.80
   9  -5  -4  828.06   28.36
  -9  -5   3  137.01   10.79
   9   5  -3  146.23   11.04
  -9   5   3  133.53    9.05
   9  -5  -3  144.36   11.18
  -9   5   2   44.03    5.77
   9   5  -2   44.04    6.28
  -9  -5   2   49.01    7.12
  -9   5   1    4.33    3.11
   9   5  -1   -1.63    3.81
  -9  -5   1    1.31    3.97
  -9  -5   0   83.90    8.78
  -9   5   0   77.78    7.80
   9   5   0   99.25    9.31
  -9  -5  -1   12.28    4.59
  -9   5  -1    9.44    4.04
  -9  -5  -2   87.03    9.07
  -9   5  -2   81.51    8.55
  -9   5  -3  507.33   21.81
  -9  -5  -3  557.81   23.35
  -9   5  -4  353.21   18.28
  -9  -5  -4  348.82   18.41
  -9   5  -5  152.16   12.26
  -9  -5  -5  165.56   12.96
  -9  -5  -6  119.51   11.17
  -9   5  -6   93.95   10.25
  -9  -5  -7  390.94   20.64
  -9   5  -7  338.52   19.40
  -9  -5  -8  359.85   20.21
  -9  -5  -9  130.05   12.47
  -9  -5 -10    2.67    5.07
  -9  -5 -11   63.72    9.37
   9  -6 -15   60.36    8.89
   9   6 -14    8.67    6.41
   9  -6 -14   16.25    5.52
   9   6 -13  472.36   24.52
   9  -6 -13  423.92   21.84
   9   6 -12   17.07    6.29
   9  -6 -12   17.46    5.00
   9   6 -11  243.79   16.60
   9  -6 -11  208.52   14.42
  -9  -6  10   53.61    7.02
   9   6 -10   60.01    8.93
   9  -6 -10   52.30    7.51
  -9  -6   9  500.28   20.81
   9   6  -9  511.22   23.72
   9  -6  -9  522.74   22.53
  -9  -6   8    8.41    3.67
   9   6  -8    7.97    4.45
   9  -6  -8    3.96    3.93
  -9  -6   7    3.57    3.30
   9   6  -7   -3.49    4.70
   9  -6  -7    2.71    3.91
  -9  -6   6   18.63    4.92
   9   6  -6   15.77    4.89
   9  -6  -6    5.27    3.26
  -9  -6   5   17.11    4.89
   9   6  -5   13.27    5.21
   9  -6  -5   17.60    4.81
  -9  -6   4  148.33   11.01
   9   6  -4  163.62   12.00
   9  -6  -4  167.57   11.79
  -9   6   4  149.03    9.05
  -9  -6   3  442.22   19.65
   9   6  -3  425.15   19.46
   9  -6  -3  452.50   19.76
  -9   6   3  414.47   16.43
  -9   6   2   58.34    6.28
  -9  -6   2   70.81    8.34
   9   6  -2   62.02    7.56
  -9  -6   1  586.43   23.60
   9   6  -1  603.86   23.43
  -9   6   1  614.14   21.84
   9   6   0    6.47    3.62
  -9  -6   0   -0.25    3.87
  -9   6   0   10.09    4.07
  -9   6  -1  808.12   27.10
  -9  -6  -1  824.80   29.20
  -9   6  -2  307.85   16.15
  -9  -6  -2  343.15   18.03
  -9   6  -3  296.79   16.21
  -9  -6  -3  289.06   16.66
  -9   6  -4   24.93    5.99
  -9  -6  -4   38.40    6.83
  -9   6  -5  190.40   14.00
  -9  -6  -5  211.67   14.55
  -9  -6  -6   11.09    4.93
  -9   6  -6    5.06    4.47
  -9  -6  -7   10.96    5.67
  -9  -6  -8   42.01    8.10
  -9  -6  -9  121.85   11.99
  -9  -6 -10   78.78   10.18
  -9  -6 -11  134.39   13.30
   9  -7 -14   12.26    6.84
   9  -7 -13  126.88   11.67
   9   7 -13  118.75   12.50
   9   7 -12    2.24    4.92
   9  -7 -12    2.85    4.49
   9   7 -11   -1.63    5.30
   9  -7 -11    0.93    3.58
  -9  -7  10   -0.36    3.71
   9   7 -10   -0.45    4.78
   9  -7 -10    9.05    4.31
  -9  -7   9  208.17   13.41
   9   7  -9  209.19   14.94
   9  -7  -9  194.74   13.33
  -9  -7   8   39.77    6.26
   9   7  -8   36.01    7.17
   9  -7  -8   47.43    6.87
  -9  -7   7  642.19   24.41
   9   7  -7  644.31   26.14
   9  -7  -7  651.84   25.15
  -9  -7   6    6.60    4.23
   9   7  -6   -1.30    3.81
   9  -7  -6   -1.60    3.42
  -9  -7   5  201.85   13.08
   9   7  -5  214.15   13.86
   9  -7  -5  230.57   13.93
  -9  -7   4   21.98    5.32
  -9   7   4   16.96    3.62
   9   7  -4   16.82    5.01
   9  -7  -4   13.40    4.34
  -9  -7   3  371.42   18.30
  -9   7   3  365.01   15.23
   9   7  -3  383.06   18.35
  -9   7   2    9.01    3.41
  -9  -7   2    2.12    4.28
   9   7  -2   -2.85    3.74
  -9   7   1   65.71    7.00
  -9  -7   1   57.19    7.86
   9   7  -1   76.47    8.26
  -9   7   0    9.32    3.81
  -9  -7   0    5.54    4.08
   9   7   0    1.83    3.82
  -9   7  -1    9.01    4.36
  -9  -7  -1   14.62    5.15
  -9  -7  -2   22.28    5.95
  -9   7  -2   18.43    4.93
  -9  -7  -3  209.55   14.25
  -9   7  -3  192.68   12.95
  -9  -7  -4    2.85    3.58
  -9   7  -4    2.24    3.86
  -9  -7  -5  445.54   21.80
  -9  -7  -6   39.13    7.37
  -9  -7  -7  963.06   34.88
  -9  -7  -8   19.53    6.47
  -9  -7  -9   78.85    9.83
  -9  -7 -10    6.13    5.20
  -9  -7 -11  234.08   17.22
   9   8 -13  289.88   19.37
   9  -8 -13  292.69   17.46
   9   8 -12   89.13   10.87
   9  -8 -12  100.03   10.23
  -9  -8  11   44.86    6.91
   9   8 -11   22.60    6.49
   9  -8 -11   38.23    6.68
   9   8 -10  124.23   12.15
   9  -8 -10  126.80   11.08
  -9  -8  10  130.88   10.98
  -9  -8   9  285.02   16.02
   9   8  -9  248.06   16.52
   9  -8  -9  249.18   15.09
  -9  -8   8   -1.37    3.81
   9   8  -8    6.55    4.52
   9  -8  -8    6.61    3.95
  -9  -8   7   41.83    6.74
   9   8  -7   36.49    6.72
   9  -8  -7   61.18    7.75
  -9  -8   6    4.51    3.57
   9   8  -6    1.84    5.09
   9  -8  -6    4.35    3.88
  -9  -8   5   20.70    5.12
   9   8  -5    9.40    4.03
   9  -8  -5   14.47    4.61
  -9  -8   4   59.16    7.44
   9   8  -4   62.01    7.67
   9  -8  -4   68.00    7.97
  -9   8   3  457.44   17.39
  -9  -8   3  453.08   20.65
   9   8  -3  464.56   20.34
  -9  -8   2   96.73    9.69
   9   8  -2   91.93    9.04
  -9   8   2   97.87    8.05
  -9  -8   1  585.25   24.14
   9   8  -1  614.05   23.49
  -9   8   1  568.19   21.21
  -9   8   0   26.34    5.27
  -9  -8   0    8.75    4.17
   9   8   0   35.74    6.24
  -9   8  -1  299.61   15.81
  -9  -8  -1  323.46   17.91
  -9  -8  -2  201.30   14.07
  -9  -8  -3   59.68    8.15
  -9  -8  -4   43.18    7.23
  -9  -8  -5   51.56    8.14
  -9  -8  -6   18.57    5.89
  -9  -8  -7   35.26    7.59
  -9  -8  -8   37.48    7.61
  -9  -8  -9   53.93    9.11
  -9  -8 -10  126.14   12.77
  -9  -8 -11  112.53   12.42
   9   9 -13  105.47   12.17
   9   9 -12    0.17    4.56
  -9  -9  11    2.43    3.90
   9   9 -11   -0.87    4.85
   9  -9 -11   -0.96    4.69
   9   9 -10  124.14   12.32
   9  -9 -10  140.40   11.46
  -9  -9  10  151.25   12.07
  -9  -9   9   30.09    6.24
   9   9  -9   33.93    7.01
   9  -9  -9   18.03    5.26
  -9  -9   8  425.87   20.40
   9   9  -8  449.91   21.89
   9  -9  -8  457.62   20.47
  -9  -9   7    1.98    4.30
   9   9  -7    4.05    4.49
   9  -9  -7    3.48    3.69
  -9  -9   6  309.88   17.06
   9   9  -6  326.98   17.79
   9  -9  -6  324.66   16.79
  -9  -9   5    6.70    4.13
   9   9  -5    9.27    4.56
   9  -9  -5   10.48    4.76
  -9  -9   4  831.83   29.58
   9   9  -4  810.26   28.82
  -9  -9   3   28.48    5.93
   9   9  -3   26.44    6.03
  -9  -9   2    3.51    4.47
   9   9  -2    6.13    3.69
  -9  -9   1    4.89    4.63
   9   9  -1    7.55    4.42
  -9  -9   0  151.57   12.56
   9   9   0  151.95   11.10
  -9  -9  -1   46.92    7.71
  -9  -9  -2   49.14    8.18
  -9  -9  -3  175.75   13.55
  -9  -9  -4  304.77   18.10
  -9  -9  -5    4.19    4.38
  -9  -9  -6  191.44   14.67
  -9  -9  -7   61.62    9.05
  -9  -9  -8  817.91   32.33
  -9  -9  -9   -5.87    5.69
  -9  -9 -10   85.03   11.14
   9  10 -12  364.51   21.74
  -9 -10  11   -1.98    4.11
   9  10 -11    3.57    5.27
   9  10 -10  437.31   22.78
   9 -10 -10  426.77   20.28
  -9 -10  10  449.75   21.73
  -9 -10   9   11.41    4.92
   9  10  -9    7.39    4.67
   9 -10  -9    4.77    3.71
  -9 -10   8   12.83    5.68
   9  10  -8   13.56    4.98
   9 -10  -8    9.45    4.56
  -9 -10   7   33.58    6.69
   9  10  -7   38.04    6.70
   9 -10  -7   30.05    5.59
  -9 -10   6   15.84    5.01
   9  10  -6   19.00    5.33
   9 -10  -6   13.84    4.16
  -9 -10   5   16.28    4.97
   9  10  -5   14.59    4.81
  -9 -10   4  286.10   16.78
   9  10  -4  282.63   15.92
  -9 -10   3   36.68    7.25
   9  10  -3   32.43    6.03
  -9 -10   2  763.53   28.73
   9  10  -2  743.23   26.82
  -9 -10   1   98.01   10.01
   9  10  -1   85.61    8.59
  -9 -10   0  277.44   16.82
   9  10   0  279.57   15.19
  -9 -10  -1   19.89    5.42
  -9 -10  -2  884.89   32.54
  -9 -10  -3   -4.96    4.28
  -9 -10  -4   -1.41    4.30
  -9 -10  -5   11.05    5.84
  -9 -10  -6  133.55   12.81
  -9 -10  -7    7.78    4.92
  -9 -10  -8   36.63    7.94
  -9 -10  -9    8.06    4.99
  -9 -10 -10  237.58   17.36
  -9 -11  12   83.01    9.88
   9  11 -12   81.83   10.89
  -9 -11  11    2.01    4.40
   9  11 -11    0.01    5.33
  -9 -11  10  106.58   10.96
   9  11 -10  139.17   13.09
  -9 -11   9   31.04    6.54
   9  11  -9   39.83    7.78
   9  11  -8  328.30   18.79
   9 -11  -8  343.36   17.44
  -9 -11   8  326.31   18.51
  -9 -11   7  274.47   16.86
   9  11  -7  248.01   16.04
   9 -11  -7  282.90   15.54
  -9 -11   6  101.66   10.34
   9  11  -6  101.93   10.04
  -9 -11   5   32.82    6.59
   9  11  -5   34.27    6.51
  -9 -11   4  266.29   16.49
   9  11  -4  272.41   15.79
  -9 -11   3  118.78   11.02
   9  11  -3  101.10    9.58
  -9 -11   2    6.72    4.96
   9  11  -2    1.34    3.62
  -9 -11   1   12.09    5.40
   9  11  -1   10.15    4.70
  -9 -11   0   77.92    9.34
   9  11   0   61.29    7.46
  -9 -11  -1   84.94   10.06
  -9 -11  -2   56.83    9.04
  -9 -11  -3    3.32    4.69
  -9 -11  -4  104.86   11.15
  -9 -11  -5  188.17   14.76
  -9 -11  -6  321.94   19.46
  -9 -11  -7  197.22   15.24
  -9 -11  -8  408.73   22.48
  -9 -11  -9   59.11    9.37
  -9 -12  12   -3.83    4.84
   9  12 -12    0.32    4.72
  -9 -12  11   79.08   10.04
   9  12 -11   71.34    9.38
  -9 -12  10   44.07    7.60
   9  12 -10   52.82    8.68
   9  12  -9  246.56   16.81
  -9 -12   9  242.46   16.41
  -9 -12   8    2.47    4.48
   9  12  -8    9.08    4.63
  -9 -12   7    6.17    5.19
   9  12  -7    2.95    4.31
  -9 -12   6   23.39    6.64
   9  12  -6   10.18    4.80
  -9 -12   5   -0.98    4.45
   9  12  -5    0.46    3.91
  -9 -12   4    3.06    4.32
   9  12  -4    6.89    4.55
  -9 -12   3  169.34   13.34
   9  12  -3  163.22   12.05
  -9 -12   2   11.27    4.97
   9  12  -2   37.26    6.53
  -9 -12   1  557.46   25.00
   9  12  -1  553.85   22.42
  -9 -12   0   19.98    6.30
   9  12   0   22.62    5.14
  -9 -12  -1  491.38   23.72
  -9 -12  -2   57.87    8.81
  -9 -12  -3  263.40   17.51
  -9 -12  -4   11.31    5.35
  -9 -12  -5   74.49    9.70
  -9 -12  -6   29.28    7.11
  -9 -12  -7   31.38    7.69
  -9 -12  -8  121.04   12.32
  -9 -12  -9  134.57   13.36
  -9 -13  12    2.82    4.71
  -9 -13  11   -0.95    4.70
   9  13 -11    9.42    6.19
  -9 -13  10    0.02    4.78
   9  13 -10   10.13    5.29
   9  13  -9  284.20   18.28
  -9 -13   9  295.25   18.65
  -9 -13   8   71.16    9.83
   9  13  -8   58.10    8.42
   9  13  -7  360.29   19.47
  -9 -13   7  360.74   20.36
  -9 -13   6   -2.89    5.26
   9  13  -6    4.49    4.01
  -9 -13   5  302.86   18.51
   9  13  -5  320.00   17.66
  -9 -13   4    8.08    5.34
   9  13  -4   10.21    4.43
  -9 -13   3  205.93   15.35
   9  13  -3  231.65   14.42
  -9 -13   2   11.40    5.59
   9  13  -2   12.08    4.32
  -9 -13   1    9.60    5.84
   9  13  -1    0.69    3.34
  -9 -13   0   21.24    5.98
   9  13   0   24.58    5.27
  -9 -13  -1   22.65    6.61
  -9 -13  -2   16.20    6.11
  -9 -13  -3  105.80   11.66
  -9 -13  -4    5.64    5.86
  -9 -13  -5  189.46   15.01
  -9 -13  -6   36.96    7.71
  -9 -13  -7  553.24   26.93
  -9 -13  -8    8.41    5.39
  -9 -14  12   71.18    9.99
  -9 -14  11   61.91    9.53
   9  14 -11   66.69    9.79
  -9 -14  10    7.06    5.60
   9  14 -10    1.64    4.87
  -9 -14   9   79.57   10.72
   9  14  -9   89.01   10.54
  -9 -14   8    8.14    5.58
   9  14  -8    8.98    4.88
  -9 -14   7   -5.77    5.37
   9  14  -7    2.57    4.28
  -9 -14   6   33.96    7.27
   9  14  -6   30.23    6.43
  -9 -14   5   32.67    7.15
   9  14  -5   37.05    7.19
  -9 -14   4   44.71    8.02
   9  14  -4   25.56    5.75
  -9 -14   3  337.97   19.75
   9  14  -3  360.20   18.15
  -9 -14   2   99.58   10.76
   9  14  -2  106.96    9.69
  -9 -14   1   77.75    9.89
  -9 -14   0   66.41    8.79
  -9 -14  -1  486.47   24.31
  -9 -14  -2  126.75   12.77
  -9 -14  -3  151.17   13.93
  -9 -14  -4    6.82    5.01
  -9 -14  -5    0.97    4.50
  -9 -14  -6    1.90    4.76
  -9 -14  -7   25.65    7.79
  -9 -15  10    8.24    5.09
   9  15 -10   -1.81    5.47
   9  15  -9  219.14   16.11
  -9 -15   9  207.10   16.22
  -9 -15   8   88.58   11.11
   9  15  -8  108.57   11.15
  -9 -15   7    3.46    5.27
   9  15  -7    7.53    4.21
   9  15  -6  218.30   14.92
  -9 -15   6  193.33   15.44
  -9 -15   5   99.89   11.33
   9  15  -5  111.01   10.50
  -9 -15   4  147.62   13.52
   9  15  -4  122.11   10.77
  -9 -15   3   14.28    5.67
  -9 -15   2   27.17    7.21
  -9 -15   1   10.62    5.28
  -9 -15   0    4.21    6.02
  -9 -15  -1   26.71    7.02
  -9 -15  -2   69.55    9.96
  -9 -15  -3  404.49   22.75
  -9 -15  -4   53.80    8.85
  -9 -15  -5   31.73    7.15
  -9 -15  -6  103.89   12.13
   9  16 -10   80.11   10.32
  -9 -16   9   16.72    6.39
   9  16  -9    1.40    4.39
  -9 -16   8   22.61    6.76
   9  16  -8   23.69    6.48
  -9 -16   7   19.84    5.74
   9  16  -7   16.92    5.20
  -9 -16   6    4.95    5.62
  -9 -16   5    3.74    5.00
  -9 -16   4    9.84    5.58
  -9 -16   3   71.01    9.66
  -9 -16   2  154.57   14.02
  -9 -16   1   11.64    6.36
  -9 -16   0  324.15   20.13
  -9 -16  -1  149.22   14.08
  -9 -16  -2  250.47   17.95
  -9 -16  -3   -2.66    5.83
  -9 -16  -4  111.95   12.64
  -9 -16  -5   -3.58    5.67
  -9 -17   6  124.21   13.35
  -9 -17   5   31.38    7.30
  -9 -17   4  190.21   15.95
  -9 -17   3   62.14    9.48
  -9 -17   2  110.34   11.96
  -9 -17   1    8.20    5.13
  -9 -17   0   -1.31    5.38
  -9 -17  -1    1.77    4.83
  -9 -17  -2   41.49    8.24
  -9 -17  -3    0.72    5.08
  -9 -18   2  312.90   20.49
  -9 -18   1   14.80    6.03
  -9 -18   0  167.91   15.26
  10   0 -13   -0.91    4.83
  10   0 -12  151.90   13.53
  10   0 -11   -0.38    4.52
  10   0 -10  788.93   31.16
  10   0  -9   -5.37    4.20
  10   0  -8  118.56   11.28
  10   0  -7    1.60    4.19
 -10   0   6   15.13    4.04
  10   0  -6   10.48    5.00
 -10   0   5    1.06    3.40
  10   0  -5    3.00    3.98
 -10   0   4   77.68    7.84
  10   0  -4   70.97    9.10
 -10   0   3   -2.74    4.06
  10   0  -3    2.67    3.86
  10   0  -2  856.02   29.99
 -10   0   2  814.20   27.72
 -10   0   1   -0.16    4.05
  10   0  -1   -5.91    4.93
 -10   0   0  588.25   23.57
 -10   0  -1    4.08    4.14
 -10   0  -2  472.40   21.67
 -10   0  -3   -3.12    4.71
 -10   0  -4  313.14   18.17
 -10   0  -5    3.46    4.94
 -10   0  -6   39.57    7.83
 -10   0  -7    3.88    5.28
 -10   0  -8  162.58   13.89
 -10   0  -9    2.54    4.72
 -10   0 -10   64.43   10.07
  10  -1 -14    5.45    5.68
  10   1 -13    0.25    5.26
  10  -1 -13    5.53    4.89
  10   1 -12    3.44    4.94
  10  -1 -12    5.11    4.99
  10   1 -11    0.70    4.79
  10  -1 -11   22.73    6.99
  10   1 -10   16.00    5.87
  10  -1 -10   24.01    7.32
  10   1  -9  190.50   14.31
  10  -1  -9  188.13   14.21
  10   1  -8  716.58   28.64
  10  -1  -8  759.50   29.18
  10   1  -7  137.56   11.77
  10  -1  -7  128.02   11.34
 -10  -1   7  133.39    9.74
  10   1  -6  174.09   13.11
  10  -1  -6  139.84   11.92
 -10  -1   6  172.37   11.19
 -10   1   6  182.27   11.03
  10   1  -5  278.67   16.29
  10  -1  -5  280.64   16.58
 -10  -1   5  302.39   15.08
 -10   1   5  264.86   13.85
  10   1  -4  618.82   25.28
 -10  -1   4  620.30   23.12
  10  -1  -4  607.06   25.16
 -10   1   4  652.85   22.96
 -10  -1   3    3.14    3.57
 -10   1   3   -1.66    3.67
  10   1  -3   11.59    5.17
  10  -1  -3    2.91    4.14
  10   1  -2  189.60   13.69
  10  -1  -2  205.73   13.99
 -10  -1   2  196.29   12.82
 -10   1   2  210.91   12.92
 -10  -1   1   -3.70    3.62
  10   1  -1   -6.85    4.98
 -10   1   1   -1.96    3.78
 -10   1   0  160.59   11.82
 -10  -1   0  166.26   12.21
 -10   1  -1   10.99    4.97
 -10  -1  -1   12.43    5.49
 -10   1  -2   43.14    7.39
 -10  -1  -2   39.47    7.10
 -10  -1  -3  157.60   12.72
 -10   1  -3  192.79   13.89
 -10  -1  -4  262.65   16.87
 -10   1  -4  283.51   16.90
 -10   1  -5   26.36    6.45
 -10  -1  -5   17.96    5.42
 -10  -1  -6  720.63   29.63
 -10   1  -6  709.82   29.16
 -10  -1  -7  319.38   19.37
 -10   1  -7  301.03   18.96
 -10   1  -8  357.85   20.83
 -10  -1  -8  342.96   20.60
 -10   1  -9   76.11   10.07
 -10  -1  -9   74.01    9.94
 -10  -1 -10  187.47   15.69
 -10   1 -10  180.72   15.61
  10  -2 -14  223.69   16.98
  10   2 -13  167.64   14.80
  10  -2 -13  154.23   13.88
  10   2 -12   82.31   10.61
  10  -2 -12   98.68   11.01
  10   2 -11  167.31   14.27
  10  -2 -11  185.26   14.43
  10   2 -10  150.56   13.16
  10  -2 -10  172.27   13.91
  10   2  -9   59.97    8.64
  10  -2  -9   48.48    7.86
  10   2  -8   19.23    6.26
  10  -2  -8   16.02    5.58
  10   2  -7   75.21    9.06
  10  -2  -7   77.33    9.53
 -10  -2   7   73.41    7.72
  10   2  -6  122.57   11.20
  10  -2  -6   95.25    9.86
 -10  -2   6   96.05    8.75
 -10  -2   5   22.31    5.29
  10   2  -5   14.57    5.67
  10  -2  -5   15.89    6.06
 -10   2   5    5.38    3.49
 -10  -2   4   24.07    5.44
  10   2  -4   13.73    5.26
  10  -2  -4   17.97    5.31
 -10   2   4   13.46    4.36
 -10   2   3  499.92   20.10
 -10  -2   3  515.34   21.30
  10   2  -3  506.19   22.42
  10  -2  -3  533.66   22.87
 -10   2   2  365.08   17.19
 -10  -2   2  355.92   17.61
  10   2  -2  380.68   19.04
  10  -2  -2  379.59   19.06
 -10   2   1  119.75    9.95
 -10  -2   1  120.65   10.25
  10   2  -1  136.74   11.43
 -10   2   0  442.97   19.81
 -10  -2   0  441.40   20.40
 -10   2  -1 1139.40   35.82
 -10  -2  -1 1164.24   36.28
 -10   2  -2  537.87   23.07
 -10  -2  -2  518.20   22.94
 -10   2  -3   57.13    8.08
 -10  -2  -3   72.78    9.34
 -10  -2  -4   36.16    7.12
 -10   2  -4   44.88    7.19
 -10  -2  -5  135.90   12.40
 -10   2  -5  150.70   12.83
 -10  -2  -6   30.09    7.25
 -10   2  -6   35.60    7.62
 -10   2  -7   42.84    8.39
 -10  -2  -7   50.30    8.53
 -10  -2  -8   63.80    9.79
 -10   2  -8   61.04    9.29
 -10   2  -9  201.26   16.07
 -10  -2  -9  161.30   14.45
 -10   2 -10   23.77    7.23
 -10  -2 -10   25.00    6.97
  10  -3 -14    3.54    4.67
  10   3 -13   -3.54    4.31
  10  -3 -13   -2.92    5.24
  10   3 -12    1.19    4.62
  10  -3 -12   17.59    6.06
  10   3 -11   38.72    8.17
  10  -3 -11   21.78    6.18
  10   3 -10   17.43    6.32
  10  -3 -10   15.76    4.74
  10   3  -9  382.95   20.55
  10  -3  -9  327.28   18.76
  10   3  -8    3.54    5.27
  10  -3  -8    7.24    4.64
 -10  -3   8    3.34    3.60
 -10  -3   7  142.05   10.69
  10   3  -7  166.45   13.09
  10  -3  -7  167.30   12.80
  10   3  -6   29.85    6.30
  10  -3  -6   31.12    6.70
 -10  -3   6   28.06    5.15
 -10   3   5  860.97   26.31
 -10  -3   5  859.18   28.56
  10   3  -5  833.05   30.42
  10  -3  -5  788.26   29.55
 -10   3   4   10.68    3.57
  10   3  -4    9.62    4.91
  10  -3  -4   11.63    5.12
 -10  -3   4   17.36    4.65
 -10   3   3  239.02   13.42
 -10  -3   3  235.07   14.37
  10   3  -3  239.24   15.15
  10  -3  -3  264.18   15.76
 -10  -3   2    5.23    4.33
 -10   3   2   -0.48    3.36
  10   3  -2    0.35    3.71
  10  -3  -2   -5.10    5.11
 -10  -3   1   82.59    9.00
 -10   3   1   91.12    8.68
  10   3  -1  102.74    9.97
 -10   3   0  221.88   13.76
 -10  -3   0  253.30   15.09
 -10  -3  -1   -1.87    4.00
 -10   3  -1   10.53    4.72
 -10   3  -2    7.78    4.51
 -10  -3  -2    3.67    4.35
 -10   3  -3  501.93   22.61
 -10  -3  -3  516.69   23.34
 -10   3  -4   -0.03    3.95
 -10  -3  -4   -0.23    4.54
 -10  -3  -5  146.07   12.88
 -10   3  -5  122.91   11.60
 -10   3  -6   57.59    9.13
 -10  -3  -6   33.81    6.75
 -10   3  -7  658.11   28.66
 -10  -3  -7  675.03   28.91
 -10   3  -8  145.53   13.63
 -10  -3  -8  119.61   12.56
 -10   3  -9   45.63    8.57
 -10  -3  -9   38.19    7.81
 -10   3 -10    5.52    4.98
 -10  -3 -10    2.04    5.76
  10  -4 -14   45.43    8.45
  10   4 -13  235.15   17.56
  10  -4 -13  253.10   17.56
  10   4 -12    2.49    5.33
  10  -4 -12    5.23    4.72
  10   4 -11  182.01   14.73
  10  -4 -11  213.30   15.50
  10   4 -10   26.46    7.19
  10  -4 -10   53.19    8.29
  10   4  -9  341.57   19.95
  10  -4  -9  357.40   19.57
  10   4  -8    6.99    5.65
 -10  -4   8   13.21    3.92
  10  -4  -8   20.00    5.72
 -10  -4   7    5.69    4.34
  10  -4  -7    6.59    4.57
  10   4  -6    6.62    5.72
 -10  -4   6    0.71    3.30
  10  -4  -6   -2.70    4.34
  10   4  -5   10.80    4.93
  10  -4  -5   12.58    5.48
 -10  -4   5    9.40    4.72
 -10   4   4   25.79    4.70
  10   4  -4   32.65    6.96
  10  -4  -4   32.10    6.46
 -10  -4   4   29.64    6.28
 -10   4   3  433.70   18.34
 -10  -4   3  427.13   19.87
  10   4  -3  437.08   20.73
  10  -4  -3  452.72   21.03
 -10  -4   2  122.89   10.49
 -10   4   2  123.97    9.70
  10   4  -2  121.84   10.80
 -10   4   1  294.62   15.39
 -10  -4   1  275.04   16.08
  10   4  -1  279.66   16.28
 -10   4   0   76.84    8.34
 -10  -4   0   85.12    9.19
 -10  -4  -1  742.19   27.96
 -10   4  -1  714.17   26.61
 -10   4  -2   10.83    4.26
 -10  -4  -2   19.97    5.96
 -10  -4  -3  172.62   13.52
 -10   4  -3  163.89   12.61
 -10   4  -4  181.18   13.56
 -10  -4  -4  164.66   13.44
 -10  -4  -5  167.21   13.89
 -10   4  -5  194.20   14.44
 -10  -4  -6   44.08    7.84
 -10   4  -6   41.73    7.89
 -10   4  -7   28.83    7.53
 -10  -4  -7   37.86    8.52
 -10   4  -8    5.04    5.42
 -10  -4  -8   23.12    6.81
 -10  -4  -9   30.10    7.78
 -10   4  -9   18.69    6.91
 -10  -4 -10   27.99    7.98
  10  -5 -14   15.12    5.91
  10   5 -13   11.72    5.02
  10  -5 -13   27.16    6.80
  10   5 -12   -5.81    4.93
  10  -5 -12   -0.97    4.56
  10   5 -11   15.22    6.04
  10  -5 -11    5.30    4.43
  10   5 -10   13.92    5.86
  10  -5 -10   21.80    6.12
 -10  -5   9  301.66   16.08
  10   5  -9  291.13   18.25
  10  -5  -9  309.41   17.93
 -10  -5   8  442.51   19.89
  10   5  -8  464.32   22.62
  10  -5  -8  420.40   21.11
 -10  -5   7  282.11   15.78
  10   5  -7  295.43   17.33
  10  -5  -7  264.60   16.40
 -10  -5   6  149.74   11.38
  10   5  -6  118.36   11.11
  10  -5  -6   97.33   10.05
 -10  -5   5  234.93   14.52
  10   5  -5  211.23   14.35
  10  -5  -5  245.64   15.39
 -10  -5   4  325.84   17.39
  10   5  -4  316.59   17.58
 -10   5   4  327.40   15.00
  10  -5  -4  327.65   17.72
 -10  -5   3  265.44   15.67
  10   5  -3  273.45   16.33
 -10   5   3  253.24   13.51
  10  -5  -3  289.20   16.45
 -10   5   2   19.80    4.87
  10   5  -2   20.16    5.39
 -10  -5   2   25.14    5.92
 -10  -5   1   20.49    6.17
 -10   5   1   22.16    4.88
  10   5  -1   18.34    5.52
 -10  -5   0    0.40    4.03
 -10   5   0    4.60    3.99
 -10  -5  -1    6.55    5.15
 -10   5  -1    3.85    4.35
 -10  -5  -2   36.24    6.75
 -10   5  -2   34.33    6.40
 -10   5  -3   86.46    9.63
 -10  -5  -3   60.25    8.72
 -10   5  -4   90.96    9.85
 -10  -5  -4   69.89    9.10
 -10   5  -5  423.35   21.71
 -10  -5  -5  486.48   23.59
 -10  -5  -6  188.95   14.76
 -10   5  -6  190.67   14.82
 -10  -5  -7  362.42   21.13
 -10   5  -7  361.11   20.74
 -10  -5  -8   67.20    9.78
 -10  -5  -9   23.24    6.32
  10  -6 -14  174.05   14.89
  10  -6 -13    9.73    5.25
  10  -6 -12  134.00   12.41
  10   6 -12  143.96   13.85
  10   6 -11   -0.78    4.55
  10  -6 -11    5.24    4.39
  10   6 -10  483.65   24.24
  10  -6 -10  462.97   22.72
 -10  -6   9   34.69    6.25
  10   6  -9   39.58    8.01
  10  -6  -9   40.61    7.47
 -10  -6   8   60.09    7.70
  10   6  -8   58.14    8.79
  10  -6  -8   41.26    6.98
 -10  -6   7  192.01   13.12
  10   6  -7  203.10   14.69
  10  -6  -7  180.48   13.45
 -10  -6   6   47.55    7.05
  10   6  -6   40.76    7.00
  10  -6  -6   30.96    6.31
 -10  -6   5   23.88    5.26
  10   6  -5   20.46    5.68
  10  -6  -5   25.33    6.24
  10   6  -4  140.14   11.86
  10  -6  -4  127.26   11.25
 -10  -6   4  107.44   10.15
 -10  -6   3  143.12   11.77
  10   6  -3  151.08   12.23
 -10   6   3  123.59    9.35
 -10  -6   2  240.90   15.38
  10   6  -2  260.83   15.61
 -10   6   2  255.38   13.78
 -10   6   1  177.60   11.80
 -10  -6   1  174.36   13.08
  10   6  -1  162.42   12.19
 -10   6   0  166.47   11.82
 -10  -6   0  162.99   12.76
  10   6   0  175.26   12.81
 -10  -6  -1   35.77    7.01
 -10   6  -1   43.51    6.45
 -10   6  -2  621.58   24.92
 -10  -6  -2  599.27   25.80
 -10  -6  -3   15.69    5.67
 -10   6  -3   17.86    6.02
 -10   6  -4  108.95   10.67
 -10  -6  -4  125.95   12.36
 -10  -6  -5    7.13    5.36
 -10   6  -5    2.39    4.44
 -10  -6  -6  234.13   16.61
 -10   6  -6  232.95   16.45
 -10  -6  -7   70.84    9.91
 -10  -6  -8   45.44    8.35
 -10  -6  -9    7.12    5.38
  10  -7 -13   27.27    6.65
  10   7 -12   13.69    6.40
  10  -7 -12   11.74    4.82
  10   7 -11    3.71    4.83
  10  -7 -11    2.91    4.24
  10   7 -10   81.83   10.39
  10  -7 -10   90.38   10.18
 -10  -7   9    3.70    3.76
  10   7  -9    0.90    4.41
  10  -7  -9   -1.18    4.00
 -10  -7   8  248.74   15.20
  10   7  -8  222.32   15.98
  10  -7  -8  231.09   15.27
 -10  -7   7   23.65    6.02
  10   7  -7   32.24    6.29
  10  -7  -7   25.09    5.91
 -10  -7   6  497.92   22.15
  10   7  -6  505.58   23.27
  10  -7  -6  513.74   22.80
 -10  -7   5   24.26    5.78
  10   7  -5   14.18    4.23
  10  -7  -5   11.97    4.71
 -10  -7   4  666.13   26.69
  10   7  -4  715.34   27.61
  10  -7  -4  741.00   27.55
 -10   7   3    8.80    3.99
 -10  -7   3   10.99    5.28
  10   7  -3   19.05    5.76
 -10   7   2   45.19    6.14
 -10  -7   2   41.53    7.16
  10   7  -2   48.75    7.72
 -10   7   1   58.84    7.23
  10   7  -1   56.68    7.84
 -10  -7   1   42.46    7.25
 -10   7   0  393.80   18.55
 -10  -7   0  395.68   20.39
  10   7   0  419.63   19.92
 -10  -7  -1   33.29    7.05
 -10   7  -1   32.14    6.01
 -10  -7  -2  372.34   20.04
 -10   7  -2  350.15   18.21
 -10   7  -3    0.54    3.95
 -10  -7  -3    6.34    4.91
 -10   7  -4  244.58   16.24
 -10  -7  -4  289.29   17.94
 -10  -7  -5    0.75    4.50
 -10  -7  -6  392.52   21.90
 -10  -7  -7   11.39    5.60
 -10  -7  -8  368.36   21.69
 -10  -7  -9   -9.23    5.86
  10   8 -12  219.37   17.14
  10  -8 -12  222.24   15.64
  10   8 -11  106.55   12.30
  10  -8 -11   76.85    9.50
 -10  -8  10  120.68   10.97
  10   8 -10  127.17   12.54
  10  -8 -10  113.23   11.11
 -10  -8   9  125.41   11.22
  10   8  -9  133.32   12.73
  10  -8  -9  143.36   12.01
 -10  -8   8   16.35    5.63
  10   8  -8   27.35    7.37
  10  -8  -8   18.85    5.06
 -10  -8   7    3.10    4.04
  10   8  -7   -2.87    4.26
  10  -8  -7    2.07    3.65
 -10  -8   6   19.45    5.84
  10   8  -6    3.09    4.41
  10  -8  -6   19.36    5.54
 -10  -8   5    1.67    4.23
  10   8  -5    8.31    4.32
  10  -8  -5    7.64    4.65
 -10  -8   4  412.29   20.50
  10   8  -4  380.25   19.84
 -10  -8   3   64.34    8.75
  10   8  -3   65.63    8.18
 -10  -8   2  242.51   15.70
  10   8  -2  197.84   13.78
 -10   8   2  197.81   12.20
  10   8  -1  124.22   10.86
 -10  -8   1  121.39   11.53
 -10   8   1  126.21   10.18
 -10  -8   0  346.79   19.26
  10   8   0  369.76   18.64
 -10   8   0  343.96   17.20
 -10   8  -1  142.70   11.43
 -10  -8  -1  140.95   12.62
 -10  -8  -2  364.55   20.24
 -10  -8  -3  161.62   13.45
 -10  -8  -4   10.59    5.18
 -10  -8  -5   26.95    7.07
 -10  -8  -6  120.09   12.32
 -10  -8  -7   50.65    8.47
 -10  -8  -8  152.07   13.90
 -10  -8  -9   46.55    8.63
  10   9 -11   -1.02    5.85
  10  -9 -11    0.61    3.90
 -10  -9  10   63.95    8.66
  10   9 -10   64.58    9.33
  10  -9 -10   61.63    8.29
 -10  -9   9  325.87   18.49
  10   9  -9  357.47   20.62
  10  -9  -9  324.54   18.30
 -10  -9   8   99.85   10.35
  10   9  -8   72.45    9.88
  10  -9  -8   91.48    9.68
 -10  -9   7  294.91   17.37
  10   9  -7  298.76   17.88
  10  -9  -7  287.20   16.80
 -10  -9   6   71.98    8.91
  10   9  -6   54.74    8.32
  10  -9  -6   82.87    9.25
 -10  -9   5   92.19    9.95
  10   9  -5  103.22   10.47
 -10  -9   4  148.60   12.54
  10   9  -4  153.39   12.44
 -10  -9   3  367.18   19.73
  10   9  -3  361.30   18.98
 -10  -9   2   -0.04    4.35
  10   9  -2    1.88    3.57
 -10  -9   1   58.26    9.04
  10   9  -1   48.91    7.42
 -10  -9   0    0.59    4.58
  10   9   0  -11.37    5.10
 -10  -9  -1   12.26    5.37
 -10  -9  -2  299.08   18.23
 -10  -9  -3   69.07    9.68
 -10  -9  -4   31.65    7.47
 -10  -9  -5  317.08   19.71
 -10  -9  -6   63.48    9.70
 -10  -9  -7  260.44   18.24
 -10  -9  -8  145.60   13.91
  10  10 -11  246.42   18.04
 -10 -10  10   18.26    5.88
  10  10 -10   16.66    5.47
 -10 -10   9  351.74   19.40
  10  10  -9  284.88   18.91
  10 -10  -9  314.31   17.77
 -10 -10   8   -0.38    3.87
  10  10  -8    4.27    6.03
  10 -10  -8    3.69    4.27
 -10 -10   7   16.11    5.39
  10  10  -7   19.83    5.81
  10 -10  -7   30.27    6.17
 -10 -10   6    2.29    4.49
  10  10  -6   -1.39    4.58
 -10 -10   5   15.70    5.88
  10  10  -5   12.53    5.58
 -10 -10   4   11.67    5.54
  10  10  -4    7.13    4.36
 -10 -10   3  299.61   18.07
  10  10  -3  322.89   17.81
 -10 -10   2   11.82    5.56
  10  10  -2    1.60    4.17
 -10 -10   1  351.33   20.00
  10  10  -1  352.94   18.39
 -10 -10   0   -3.59    5.45
  10  10   0   12.34    4.93
 -10 -10  -1  242.06   16.48
 -10 -10  -2   12.40    6.10
 -10 -10  -3   81.97   10.44
 -10 -10  -4   23.12    6.39
 -10 -10  -5   51.98    8.72
 -10 -10  -6    4.58    4.79
 -10 -10  -7   59.27    9.73
 -10 -10  -8   22.21    7.03
 -10 -11  11    7.03    5.01
  10  11 -11    8.39    5.40
 -10 -11  10  207.52   15.28
  10  11 -10  188.80   15.48
 -10 -11   9  416.13   21.79
  10  11  -9  398.19   22.22
 -10 -11   8   24.48    6.30
  10  11  -8   44.47    8.01
  10 -11  -8   36.08    6.44
 -10 -11   7  134.80   12.45
  10  11  -7  138.13   12.80
 -10 -11   6  139.55   12.66
  10  11  -6  134.13   12.17
 -10 -11   5  196.84   14.88
  10  11  -5  211.40   14.83
 -10 -11   4   78.75    9.92
  10  11  -4   85.62    9.63
 -10 -11   3   95.30   10.54
  10  11  -3   85.95    9.69
 -10 -11   2    2.61    4.78
  10  11  -2    0.29    3.96
 -10 -11   1    5.88    5.33
  10  11  -1    9.96    5.04
 -10 -11   0   21.88    6.39
 -10 -11  -1    7.36    5.77
 -10 -11  -2   56.13    9.01
 -10 -11  -3  211.07   16.17
 -10 -11  -4   43.39    8.17
 -10 -11  -5   67.98    9.42
 -10 -11  -6   55.04    9.01
 -10 -11  -7  262.48   18.62
 -10 -12  11  113.51   12.03
 -10 -12  10   59.25    9.03
  10  12 -10   55.65    9.34
 -10 -12   9   25.62    6.15
  10  12  -9   21.74    6.77
 -10 -12   8   29.10    7.32
  10  12  -8   37.80    7.85
 -10 -12   7    1.36    5.14
  10  12  -7   11.06    5.57
 -10 -12   6   40.06    8.05
  10  12  -6   20.70    6.04
 -10 -12   5   -8.78    6.12
  10  12  -5    9.02    5.47
 -10 -12   4  182.95   14.65
  10  12  -4  185.74   13.69
 -10 -12   3  137.04   12.72
  10  12  -3  141.47   12.14
 -10 -12   2  189.74   14.80
  10  12  -2  151.14   12.18
 -10 -12   1   18.03    6.81
  10  12  -1    7.99    3.91
 -10 -12   0  436.53   23.19
 -10 -12  -1  334.52   20.48
 -10 -12  -2  272.66   18.53
 -10 -12  -3   14.48    5.69
 -10 -12  -4   -4.47    4.82
 -10 -12  -5   -0.05    4.97
 -10 -12  -6   74.09   10.24
 -10 -13  11    8.84    5.60
 -10 -13  10   74.87   10.06
  10  13 -10   74.03   10.63
 -10 -13   9   19.67    6.27
  10  13  -9   26.41    6.86
 -10 -13   8  463.38   24.07
  10  13  -8  457.21   23.77
 -10 -13   7   18.55    6.20
  10  13  -7   35.83    7.46
 -10 -13   6  231.22   16.67
  10  13  -6  221.04   15.76
 -10 -13   5   38.26    8.05
  10  13  -5   25.40    5.84
 -10 -13   4  231.51   16.77
  10  13  -4  252.40   15.94
 -10 -13   3   74.10    9.87
  10  13  -3   82.21    9.29
 -10 -13   2    2.55    5.15
  10  13  -2    2.81    3.79
 -10 -13   1    4.38    5.74
  10  13  -1    3.67    3.72
 -10 -13   0    8.17    4.90
 -10 -13  -1   11.57    6.48
 -10 -13  -2   52.21    8.98
 -10 -13  -3    4.55    4.94
 -10 -13  -4  107.36   12.21
 -10 -13  -5   55.57    8.77
 -10 -14   9   42.31    8.75
  10  14  -9   37.61    8.35
 -10 -14   8   42.59    8.39
  10  14  -8   32.96    7.20
 -10 -14   7   10.04    5.09
  10  14  -7    4.71    4.79
 -10 -14   6    4.02    5.02
  10  14  -6    0.87    4.71
 -10 -14   5    3.12    5.29
  10  14  -5    2.67    4.28
 -10 -14   4   38.31    8.24
  10  14  -4   32.03    6.63
 -10 -14   3   65.31    9.70
  10  14  -3   80.48    9.14
 -10 -14   2  236.09   17.41
 -10 -14   1  288.23   19.10
 -10 -14   0  205.90   16.42
 -10 -14  -1   23.29    6.71
 -10 -14  -2  251.66   18.22
 -10 -14  -3  126.33   13.27
 -10 -14  -4   79.18   10.54
  10  15  -9  164.98   14.68
  10  15  -8  376.84   21.61
 -10 -15   7  241.16   17.72
  10  15  -7  252.41   17.18
 -10 -15   6   49.56    8.88
  10  15  -6   50.83    8.21
 -10 -15   5  277.64   19.05
 -10 -15   4  125.52   12.81
 -10 -15   3  124.60   12.89
 -10 -15   2   -0.79    4.32
 -10 -15   1   40.04    8.45
 -10 -15   0   19.69    6.68
 -10 -15  -1   11.01    5.82
 -10 -15  -2   38.15    8.76
 -10 -15  -3  143.62   14.48
 -10 -16   4    6.71    5.61
 -10 -16   3  345.94   21.62
 -10 -16   2   47.71    9.19
 -10 -16   1  162.43   14.75
 -10 -16   0   19.69    6.46
  11   0 -12    6.70    6.51
  11   0 -11  186.64   15.49
  11   0 -10   -1.88    5.08
  11   0  -9   32.46    7.52
  11   0  -8   -0.49    4.00
  11   0  -7   73.80    9.73
  11   0  -6    2.17    4.15
 -11   0   5   24.91    5.49
  11   0  -5   17.63    5.69
 -11   0   4   -3.55    3.77
  11   0  -4    6.49    4.27
  11   0  -3  375.49   19.94
 -11   0   3  340.25   17.54
 -11   0   2    1.88    4.16
  11   0  -2    7.33    4.81
 -11   0   1  291.76   16.66
 -11   0   0   -1.69    4.03
 -11   0  -1 1254.00   39.50
 -11   0  -2    6.18    5.14
 -11   0  -3   35.11    7.09
 -11   0  -4   -1.16    4.98
 -11   0  -5   36.85    7.15
 -11   0  -6    3.69    4.60
 -11   0  -7   92.95   11.93
 -11   0  -8   -4.17    5.93
  11   1 -12   11.95    6.57
  11  -1 -12    4.33    5.19
  11   1 -11   95.74   11.40
  11  -1 -11   79.26   10.18
  11   1 -10   63.44    9.16
  11  -1 -10   52.26    8.53
  11   1  -9  281.93   18.46
  11  -1  -9  271.83   17.95
  11   1  -8  127.84   12.54
  11  -1  -8  136.85   12.78
  11   1  -7   98.97   10.98
  11  -1  -7  109.91   11.66
 -11  -1   6   13.76    4.34
  11   1  -6   18.32    5.72
  11  -1  -6   11.44    4.83
  11   1  -5  172.30   13.57
  11  -1  -5  189.13   14.34
 -11  -1   5  170.71   12.12
 -11   1   5  183.70   12.11
 -11  -1   4   74.50    8.50
 -11   1   4   83.36    8.65
  11   1  -4   83.74    9.89
  11  -1  -4   92.55   10.22
 -11  -1   3    9.68    4.34
  11   1  -3   17.03    6.70
  11  -1  -3    2.61    4.50
 -11   1   3    6.42    3.86
 -11   1   2   26.11    5.67
 -11  -1   2   42.70    7.02
  11   1  -2   41.55    7.53
  11  -1  -2   41.00    7.60
 -11   1   1  160.84   12.35
 -11  -1   1  144.09   11.97
 -11   1   0   37.87    6.60
 -11  -1   0   56.41    8.00
 -11   1  -1   63.67    9.10
 -11  -1  -1   66.53    8.99
 -11  -1  -2    2.25    4.17
 -11   1  -2    2.50    4.57
 -11  -1  -3  354.33   19.85
 -11   1  -3  330.27   19.07
 -11   1  -4   41.13    7.69
 -11  -1  -4   70.47    9.74
 -11   1  -5  124.49   12.23
 -11  -1  -5  130.06   12.64
 -11  -1  -6   54.37    8.90
 -11   1  -6   57.14    9.49
 -11   1  -7  536.32   26.69
 -11  -1  -7  544.38   26.91
 -11   1  -8   -4.21    5.27
 -11  -1  -8    1.43    4.85
  11   2 -12   22.96    6.95
  11  -2 -12   22.27    6.86
  11   2 -11   49.32    8.98
  11  -2 -11   55.48    8.84
  11   2 -10  503.71   25.33
  11  -2 -10  476.07   24.56
  11   2  -9  104.03   11.37
  11  -2  -9   76.58    9.80
  11   2  -8   10.92    5.53
  11  -2  -8    5.48    4.73
  11   2  -7   66.07    9.18
  11  -2  -7   71.99    9.56
 -11  -2   6    2.19    3.43
  11   2  -6    1.50    4.09
  11  -2  -6   -2.04    5.09
 -11  -2   5   24.01    5.65
  11   2  -5   20.11    5.71
  11  -2  -5   19.77    5.49
 -11   2   4   53.50    7.04
 -11  -2   4   39.32    6.42
  11   2  -4   36.16    6.87
  11  -2  -4   55.50    8.53
 -11   2   3  246.43   14.40
  11   2  -3  254.76   16.58
 -11  -2   3  237.39   15.01
  11  -2  -3  242.68   15.99
 -11   2   2  466.72   20.81
  11   2  -2  488.60   22.87
 -11  -2   2  444.73   20.90
 -11   2   1  161.87   12.21
 -11  -2   1  125.19   11.23
 -11   2   0  227.29   14.73
 -11  -2   0  211.44   14.69
 -11   2  -1  221.57   14.98
 -11  -2  -1  224.60   15.41
 -11  -2  -2  383.59   20.51
 -11   2  -2  410.92   20.86
 -11  -2  -3   41.12    7.47
 -11   2  -3   47.47    7.94
 -11  -2  -4   79.98   10.38
 -11   2  -4   91.98   10.90
 -11  -2  -5  112.56   12.17
 -11   2  -5   89.35   10.62
 -11   2  -6    4.71    5.58
 -11  -2  -6    0.01    4.80
 -11  -2  -7   11.91    6.73
 -11   2  -7    4.02    5.12
 -11  -2  -8    7.58    4.55
 -11   2  -8    4.19    4.64
  11  -3 -12    9.03    4.95
  11   3 -11   15.23    6.55
  11  -3 -11    4.21    5.22
  11   3 -10  147.48   13.91
  11  -3 -10  149.24   13.85
  11   3  -9   96.01   11.17
  11  -3  -9   99.29   10.96
  11   3  -8  368.71   21.26
  11  -3  -8  388.27   21.14
 -11  -3   7   -1.19    3.75
  11   3  -7    1.07    4.68
  11  -3  -7    6.81    4.74
 -11  -3   6  131.37   10.74
  11   3  -6  115.45   11.73
  11  -3  -6  122.97   11.66
 -11  -3   5   12.77    5.27
  11   3  -5    9.61    5.46
  11  -3  -5    1.11    4.23
 -11   3   4  540.34   21.44
 -11  -3   4  521.85   22.72
  11   3  -4  549.19   24.73
  11  -3  -4  513.54   23.87
 -11  -3   3   36.42    6.68
 -11   3   3   46.60    6.87
  11   3  -3   33.87    6.95
  11  -3  -3   33.05    6.50
 -11  -3   2   26.74    5.87
 -11   3   2   19.45    5.28
  11   3  -2   23.79    6.90
 -11  -3   1   33.67    6.61
 -11   3   1   50.92    7.21
 -11  -3   0   46.36    7.97
 -11   3   0   43.44    6.98
 -11   3  -1   -4.34    5.11
 -11  -3  -1    7.60    4.49
 -11   3  -2   56.81    8.17
 -11  -3  -2   67.34    9.08
 -11   3  -3    0.65    4.64
 -11  -3  -3    9.85    5.34
 -11  -3  -4  189.01   14.84
 -11   3  -4  190.65   14.76
 -11  -3  -5  110.97   12.15
 -11   3  -5  104.57   11.13
 -11   3  -6  474.64   24.44
 -11  -3  -6  454.88   24.46
 -11   3  -7   61.58    9.38
 -11  -3  -7   64.60    9.91
 -11   3  -8  191.64   16.24
 -11  -3  -8  193.51   16.09
  11  -4 -12   66.58    9.77
  11   4 -11   57.84    9.26
  11  -4 -11   46.39    8.35
  11   4 -10  238.13   17.37
  11  -4 -10  220.07   16.27
  11   4  -9   12.32    5.81
  11  -4  -9   11.16    4.59
  11   4  -8   49.26    8.66
  11  -4  -8   47.26    8.26
  11   4  -7   36.99    7.35
  11  -4  -7   31.23    7.44
 -11  -4   7   30.49    5.86
  11   4  -6   58.13    8.87
  11  -4  -6   43.29    7.64
 -11  -4   6   37.51    6.73
 -11  -4   5   58.21    7.94
  11   4  -5   58.62    8.87
  11  -4  -5   51.47    7.95
 -11  -4   4  256.58   15.71
  11   4  -4  252.28   16.65
  11  -4  -4  236.67   15.97
 -11   4   3    9.61    4.25
 -11  -4   3   11.99    5.14
  11   4  -3    7.52    4.29
 -11   4   2  120.29   10.25
 -11  -4   2  125.77   11.56
  11   4  -2  122.44   11.68
 -11   4   1   12.91    4.55
 -11  -4   1    4.51    4.56
  11   4  -1    1.07    5.03
 -11   4   0  484.61   21.85
 -11  -4   0  479.82   22.93
 -11   4  -1  111.10   10.87
 -11  -4  -1  116.49   11.57
 -11  -4  -2  361.95   19.99
 -11   4  -2  314.04   18.16
 -11   4  -3    7.23    5.21
 -11  -4  -3    7.03    5.77
 -11  -4  -4  174.68   14.41
 -11   4  -4  181.14   14.26
 -11  -4  -5  100.09   11.67
 -11   4  -5   90.36   10.44
 -11  -4  -6  251.17   18.19
 -11   4  -6  272.50   18.46
 -11   4  -7   25.51    7.05
 -11  -4  -7   20.85    7.47
 -11   4  -8   69.44   10.38
  11  -5 -12   -0.85    4.35
  11   5 -11    5.99    4.66
  11  -5 -11    6.74    4.84
  11   5 -10   98.99   11.48
  11  -5 -10  112.13   11.84
  11   5  -9  147.87   13.77
  11  -5  -9  143.94   13.13
  11   5  -8   85.46   10.27
 -11  -5   8   87.19    9.30
  11  -5  -8   85.56   10.08
 -11  -5   7  222.32   14.50
  11   5  -7  207.75   15.65
  11  -5  -7  227.54   15.85
 -11  -5   6  346.85   18.56
  11   5  -6  289.95   18.30
  11  -5  -6  314.08   18.62
 -11  -5   5  453.04   21.54
  11   5  -5  443.74   22.54
  11  -5  -5  435.26   21.92
 -11  -5   4  306.99   17.52
  11   5  -4  299.65   18.29
  11  -5  -4  309.03   18.17
 -11  -5   3  128.43   11.65
 -11   5   3  132.26   10.24
  11   5  -3  118.32   11.57
 -11  -5   2   40.53    7.34
 -11   5   2   41.14    6.07
  11   5  -2   45.73    7.52
 -11  -5   1  119.47   11.42
  11   5  -1  134.64   12.07
 -11   5   1  144.30   11.19
 -11  -5   0  213.68   15.33
 -11   5   0  212.05   14.07
 -11  -5  -1   -2.11    4.36
 -11   5  -1    4.35    4.46
 -11   5  -2   67.27    8.66
 -11  -5  -2   71.79    9.29
 -11   5  -3   49.93    8.05
 -11  -5  -3   41.55    8.05
 -11   5  -4   13.76    5.26
 -11  -5  -4   12.90    5.66
 -11  -5  -5   41.27    8.68
 -11   5  -5   37.03    7.73
 -11  -5  -6  413.08   23.43
 -11   5  -6  413.76   22.91
 -11   5  -7  240.04   17.75
 -11  -5  -7  246.79   18.20
  11  -6 -12   40.85    7.76
  11   6 -11  271.39   19.04
  11  -6 -11  297.15   18.90
  11   6 -10    3.48    5.47
  11  -6 -10   14.01    5.73
  11   6  -9  215.73   16.57
  11  -6  -9  175.79   14.29
  11   6  -8    4.40    5.03
 -11  -6   8    3.44    4.80
  11  -6  -8    8.74    4.99
  11   6  -7   -2.83    4.57
 -11  -6   7   -1.54    4.36
  11  -6  -7    1.14    4.28
  11   6  -6    4.96    4.99
 -11  -6   6   12.72    5.56
  11  -6  -6   13.27    6.15
  11   6  -5   19.82    6.85
 -11  -6   5   22.51    6.16
  11  -6  -5   10.80    5.75
 -11  -6   4  187.65   14.19
  11   6  -4  197.06   14.69
 -11  -6   3  375.26   19.99
  11   6  -3  347.94   19.63
 -11  -6   2    5.48    4.72
  11   6  -2    2.83    4.16
 -11   6   2    6.80    4.23
 -11   6   1  195.24   13.19
 -11  -6   1  167.81   13.67
  11   6  -1  159.49   13.26
 -11   6   0  201.07   13.78
 -11  -6   0  194.43   14.76
 -11   6  -1  316.26   17.80
 -11  -6  -1  317.05   18.87
 -11  -6  -2   40.85    7.87
 -11   6  -2   41.58    7.01
 -11   6  -3  151.79   12.93
 -11  -6  -3  155.09   13.78
 -11   6  -4    5.40    5.86
 -11  -6  -4    1.30    4.81
 -11  -6  -5  222.93   16.94
 -11   6  -5  259.88   17.55
 -11  -6  -6   64.79    9.73
 -11   6  -6   53.54    8.96
 -11  -6  -7    8.10    5.43
  11  -7 -12    4.42    4.20
  11  -7 -11   60.14    9.12
  11   7 -10   -2.79    5.02
  11  -7 -10   -1.05    4.78
  11   7  -9  483.44   25.00
  11  -7  -9  483.44   23.96
 -11  -7   8   24.87    6.08
  11   7  -8   21.80    6.07
  11  -7  -8   22.18    5.89
 -11  -7   7  231.30   15.62
  11   7  -7  261.39   17.37
  11  -7  -7  252.32   16.75
 -11  -7   6   17.97    5.99
  11   7  -6    8.02    4.86
  11  -7  -6   12.92    5.25
 -11  -7   5  501.14   23.76
  11   7  -5  535.30   24.85
  11  -7  -5  560.59   25.04
  11   7  -4   73.84    9.64
 -11  -7   4   63.26    9.01
 -11  -7   3  400.61   21.09
  11   7  -3  364.56   20.13
 -11   7   2   16.22    4.96
  11   7  -2   15.73    5.93
 -11  -7   2   16.64    6.08
 -11  -7   1   17.86    6.42
 -11   7   1   13.24    4.31
  11   7  -1   13.42    5.66
 -11   7   0    4.67    4.71
 -11  -7   0   -1.23    5.07
 -11  -7  -1    1.42    4.04
 -11   7  -1    5.16    4.63
 -11  -7  -2    1.60    5.15
 -11   7  -2    1.49    4.10
 -11  -7  -3  218.12   16.18
 -11   7  -3  207.01   15.15
 -11  -7  -4   26.73    7.15
 -11   7  -4   29.01    7.08
 -11  -7  -5  257.02   18.03
 -11  -7  -6   19.53    6.37
 -11  -7  -7  197.00   16.67
  11  -8 -12  136.38   12.85
  11  -8 -11  272.85   18.10
  11   8 -10   84.40   10.98
  11  -8 -10  104.41   11.00
 -11  -8   9   66.02    8.83
  11   8  -9   72.76   10.29
  11  -8  -9   75.38    9.79
 -11  -8   8   67.59    8.97
  11   8  -8   80.26   10.54
  11  -8  -8   85.98   10.52
 -11  -8   7   50.40    7.63
  11   8  -7   49.76    8.66
  11  -8  -7   34.34    6.64
 -11  -8   6   34.88    6.99
  11   8  -6   34.73    7.99
  11  -8  -6   51.45    8.33
 -11  -8   5   -0.91    4.11
  11   8  -5   -6.89    5.15
 -11  -8   4   78.45   10.13
  11   8  -4  117.12   11.48
 -11  -8   3  360.42   20.33
  11   8  -3  394.60   20.72
  11   8  -2   50.30    7.92
 -11  -8   2   50.72    7.86
  11   8  -1   87.33    9.78
 -11   8   1  103.55    9.94
 -11  -8   1  114.58   11.81
 -11   8   0  138.04   11.69
 -11  -8   0  132.43   12.54
 -11  -8  -1  136.76   13.04
 -11   8  -1  172.75   13.01
 -11  -8  -2   73.70   10.12
 -11  -8  -3  162.63   14.54
 -11  -8  -4   14.02    4.63
 -11  -8  -5   62.67    9.29
 -11  -8  -6   58.20    9.68
  11   9 -10   48.49    9.02
  11  -9 -10   54.93    8.31
 -11  -9   9  156.67   13.25
  11   9  -9  127.83   13.16
  11  -9  -9  167.50   13.67
 -11  -9   8  165.84   13.81
  11   9  -8  188.76   15.38
  11  -9  -8  194.26   14.56
 -11  -9   7   41.58    7.77
  11   9  -7   40.24    8.11
  11  -9  -7   63.90    8.86
 -11  -9   6  431.65   22.38
  11   9  -6  455.57   23.29
 -11  -9   5  195.60   14.91
  11   9  -5  173.63   14.21
 -11  -9   4  253.58   17.06
  11   9  -4  279.02   17.51
 -11  -9   3   22.45    6.71
  11   9  -3   29.46    6.68
 -11  -9   2   20.00    6.38
  11   9  -2   32.73    7.13
  11   9  -1   19.37    5.73
 -11  -9   1   11.25    5.60
 -11  -9   0   62.61    9.66
 -11  -9  -1    7.82    4.88
 -11  -9  -2  323.33   20.18
 -11  -9  -3   57.78    9.14
 -11  -9  -4   71.06   10.11
 -11  -9  -5   35.26    7.75
 -11 -10   9    8.22    4.87
  11  10  -9   24.39    6.74
  11 -10  -9   10.72    5.14
 -11 -10   8   58.45    8.84
  11  10  -8   44.39    8.42
  11 -10  -8   37.09    7.50
 -11 -10   7   -0.36    4.65
  11  10  -7   -2.59    5.03
 -11 -10   6   26.45    7.04
  11  10  -6   34.81    7.68
 -11 -10   5   -1.49    5.03
  11  10  -5    2.30    4.14
 -11 -10   4  139.93   13.28
  11  10  -4  143.05   12.81
 -11 -10   3    0.30    4.45
  11  10  -3    4.53    4.29
 -11 -10   2   49.13    8.56
  11  10  -2   52.81    8.24
 -11 -10   1   21.06    5.97
  11  10  -1    7.94    5.11
 -11 -10   0  334.44   20.46
 -11 -10  -1   22.29    6.83
 -11 -10  -2  190.22   15.79
 -11 -10  -3   10.11    5.56
 -11 -10  -4   43.79    8.92
 -11 -10  -5   -0.24    4.50
 -11 -11  10   51.02    8.72
 -11 -11   9  147.95   13.49
  11  11  -9  139.30   13.92
 -11 -11   8  242.13   17.10
  11  11  -8  249.01   17.91
 -11 -11   7   76.41   10.08
  11  11  -7   75.51   10.33
 -11 -11   6  290.31   18.75
  11  11  -6  293.10   18.76
 -11 -11   5   72.55    9.93
  11  11  -5   83.75   10.43
 -11 -11   4  372.77   21.61
  11  11  -4  399.29   21.34
 -11 -11   3  171.51   14.65
  11  11  -3  157.19   13.32
 -11 -11   2   57.11    9.10
  11  11  -2   59.18    8.35
 -11 -11   1   10.49    6.19
  11  11  -1    1.36    4.43
 -11 -11   0   18.08    6.49
 -11 -11  -1    9.28    5.34
 -11 -11  -2  334.44   20.95
 -11 -11  -3    5.98    5.54
 -11 -11  -4  138.93   13.88
 -11 -12  10  257.46   18.13
 -11 -12   9  150.18   13.80
 -11 -12   8   12.05    5.54
  11  12  -8    4.81    5.59
 -11 -12   7    9.91    6.09
  11  12  -7    8.22    5.21
 -11 -12   6   19.83    6.38
  11  12  -6   32.76    7.43
 -11 -12   5   11.91    5.92
  11  12  -5    4.33    4.78
 -11 -12   4   -0.84    4.55
  11  12  -4    5.20    4.59
 -11 -12   3  272.56   18.71
  11  12  -3  243.99   16.66
 -11 -12   2   63.25    9.72
  11  12  -2   57.28    8.49
 -11 -12   1  200.27   16.05
  11  12  -1  186.82   14.22
 -11 -12   0  118.56   12.73
 -11 -12  -1  199.19   16.47
 -11 -12  -2  153.00   14.34
 -11 -12  -3  141.75   14.17
 -11 -13   8   14.78    6.39
  11  13  -8    0.15    4.51
 -11 -13   7  164.17   14.92
  11  13  -7  168.37   14.54
 -11 -13   6   18.51    6.17
  11  13  -6   17.16    6.33
 -11 -13   5  402.21   23.05
  11  13  -5  393.00   21.63
 -11 -13   4   74.10   10.44
  11  13  -4   72.75    9.69
 -11 -13   3  141.17   14.06
  11  13  -3  147.06   12.92
 -11 -13   2    1.49    4.93
  11  13  -2   -4.46    5.14
 -11 -13   1   94.64   11.55
 -11 -13   0  -10.83    5.30
 -11 -13  -1   11.93    6.61
  11  14  -7   17.98    6.65
  11  14  -6    0.43    4.74
  11  14  -5   17.25    6.45
 -11 -14   4   24.93    7.17
  11  14  -4   17.40    6.14
 -11 -14   3  209.78   16.95
 -11 -14   2   30.06    7.57
  11  15  -7  103.44   11.67
  12   0  -9   -1.13    4.56
  12   0  -8   11.75    5.62
  12   0  -7   -5.88    5.43
  12   0  -6   34.11    7.41
  12   0  -5   -4.44    5.47
  12   0  -4  457.30   23.47
 -12   0   4  381.44   19.56
 -12   0   3    6.78    4.57
  12   0  -3    2.53    5.15
 -12   0   2  375.52   19.77
 -12   0   1    4.35    4.49
 -12   0   0  211.59   15.42
 -12   0  -1    1.75    4.74
 -12   0  -2  242.83   17.02
 -12   0  -3    2.58    4.53
 -12   0  -4   81.16   10.28
 -12   0  -5    0.18    5.42
 -12   0  -6   -6.20    5.26
  12  -1 -10  139.03   14.00
  12   1  -9   32.97    7.64
  12  -1  -9   16.08    6.48
  12   1  -8  171.61   15.08
  12  -1  -8  154.62   14.33
  12   1  -7    9.72    5.86
  12  -1  -7   29.54    7.23
  12   1  -6   63.81    9.18
  12  -1  -6  100.66   11.09
 -12  -1   5   21.79    5.36
  12   1  -5   19.80    6.19
  12  -1  -5   18.08    5.93
 -12   1   4  183.59   13.10
  12   1  -4  178.70   14.86
  12  -1  -4  179.02   14.91
 -12  -1   4  195.12   13.89
 -12   1   3   -6.22    5.22
 -12  -1   3   -0.90    4.19
  12   1  -3    2.82    5.08
  12  -1  -3    1.49    4.71
 -12   1   2    1.50    4.47
 -12  -1   2    3.31    4.52
 -12   1   1   58.60    8.42
 -12  -1   1   52.74    8.02
 -12  -1   0   22.86    5.99
 -12   1   0   25.91    6.27
 -12  -1  -1   16.88    6.35
 -12   1  -1   19.95    6.33
 -12  -1  -2   62.65    9.33
 -12   1  -2   85.39   10.53
 -12   1  -3    4.08    5.34
 -12  -1  -3    0.91    4.92
 -12   1  -4   91.54   10.98
 -12  -1  -4   99.11   11.75
 -12  -1  -5   23.03    7.23
 -12   1  -5   16.56    5.62
 -12   1  -6  224.56   17.44
  12  -2 -10   97.63   11.93
  12   2  -9  130.08   13.44
  12  -2  -9  134.59   13.61
  12   2  -8   11.43    5.98
  12  -2  -8   16.68    6.52
  12   2  -7   18.90    6.84
  12  -2  -7   32.15    7.44
  12   2  -6   18.73    6.27
  12  -2  -6   10.98    5.14
  12   2  -5  215.07   15.94
  12  -2  -5  196.52   15.53
 -12  -2   5  181.45   13.38
 -12  -2   4  109.92   10.74
  12   2  -4  114.86   12.03
  12  -2  -4  114.01   11.73
 -12   2   3  118.94   10.89
 -12  -2   3  107.62   10.75
  12   2  -3  125.69   12.37
 -12   2   2   42.26    7.31
 -12  -2   2   42.42    7.66
 -12   2   1  155.13   12.68
 -12  -2   1  147.28   12.43
 -12   2   0   33.74    6.76
 -12  -2   0   28.31    7.13
 -12  -2  -1  297.56   18.72
 -12   2  -1  331.51   19.30
 -12  -2  -2   16.27    6.25
 -12   2  -2   16.50    5.53
 -12  -2  -3    9.72    5.91
 -12   2  -3    4.97    5.63
 -12   2  -4   35.92    7.94
 -12  -2  -4   21.81    7.11
 -12  -2  -5  237.07   17.88
 -12   2  -5  225.98   17.35
 -12   2  -6   47.81    8.57
  12  -3 -10    1.36    4.70
  12   3  -9  390.31   22.98
  12  -3  -9  401.20   22.95
  12   3  -8    1.56    5.61
  12  -3  -8   -1.62    5.07
  12   3  -7  353.12   21.31
  12  -3  -7  318.01   19.79
 -12  -3   6   18.97    5.46
  12   3  -6   26.16    7.34
  12  -3  -6   17.48    6.22
  12   3  -5  472.93   24.62
 -12  -3   5  535.89   23.70
  12  -3  -5  522.68   25.41
 -12  -3   4    5.32    4.52
  12   3  -4    5.14    4.20
  12  -3  -4   10.40    4.73
 -12  -3   3   31.70    6.58
 -12   3   3   52.40    7.70
  12   3  -3   55.14    8.95
 -12  -3   2   32.90    6.51
  12   3  -2   32.97    7.65
 -12   3   2   26.40    5.80
 -12   3   1   75.45    8.83
 -12  -3   1   59.17    8.86
 -12   3   0    0.26    4.87
 -12  -3   0    0.35    4.45
 -12   3  -1   65.82    9.39
 -12  -3  -1   63.85    9.34
 -12   3  -2   88.34   10.34
 -12  -3  -2   80.97   10.30
 -12  -3  -3   91.78   11.22
 -12   3  -3   92.71   10.89
 -12  -3  -4    3.54    5.32
 -12   3  -4   -0.69    4.21
 -12   3  -5  249.76   18.03
 -12  -3  -5  234.47   17.84
  12   4  -9   70.72   10.52
  12  -4  -9   70.09   10.19
  12   4  -8    4.82    5.58
  12  -4  -8    3.39    4.56
  12   4  -7   -0.54    5.29
  12  -4  -7    5.53    4.94
 -12  -4   6    3.95    4.43
  12   4  -6    5.51    5.12
  12  -4  -6    1.49    4.59
 -12  -4   5   17.66    5.50
  12   4  -5   21.76    7.52
  12  -4  -5    9.75    5.84
 -12  -4   4   62.16    8.76
  12   4  -4   81.64   10.43
 -12  -4   3  264.84   17.13
  12   4  -3  259.30   17.47
 -12   4   2   53.13    7.63
 -12  -4   2   45.09    8.06
  12   4  -2   39.16    7.09
 -12   4   1  225.82   15.00
 -12  -4   1  220.28   15.88
 -12   4   0   -2.11    4.50
 -12  -4   0    4.88    4.63
 -12   4  -1  515.14   24.51
 -12  -4  -1  582.43   26.88
 -12   4  -2   57.28    8.69
 -12  -4  -2   84.01   10.62
 -12  -4  -3  127.54   13.23
 -12   4  -3  170.61   14.17
 -12  -4  -4   23.46    6.89
 -12   4  -4   14.11    6.01
 -12  -4  -5  112.02   12.47
 -12   4  -5  103.88   12.15
  12   5  -9  440.27   24.59
  12  -5  -9  414.99   23.22
  12   5  -8  149.82   14.31
  12  -5  -8  144.89   13.75
  12   5  -7   -0.46    4.70
  12  -5  -7    8.06    5.00
 -12  -5   7   -1.89    4.64
 -12  -5   6  176.21   13.89
  12   5  -6  219.46   16.71
  12  -5  -6  178.82   15.00
 -12  -5   5  280.07   17.44
  12   5  -5  237.46   17.27
  12  -5  -5  253.90   17.63
 -12  -5   4  409.00   21.56
  12   5  -4  441.03   23.28
 -12  -5   3   75.27    9.65
  12   5  -3  104.98   11.41
 -12  -5   2   81.22   10.17
 -12   5   2   79.53    8.93
  12   5  -2   75.86   10.18
 -12  -5   1   20.89    6.53
 -12   5   1   28.79    6.44
 -12  -5   0   78.44    9.98
 -12   5   0   54.25    8.26
 -12   5  -1    8.24    4.93
 -12  -5  -1    8.61    5.27
 -12   5  -2   58.14    8.95
 -12  -5  -2   76.06   10.89
 -12  -5  -3  184.52   15.69
 -12   5  -3  162.27   14.12
 -12  -5  -4  127.65   13.16
 -12   5  -4  106.07   11.75
 -12   5  -5  108.37   12.37
  12  -6  -9    4.12    5.74
  12   6  -8    7.77    5.58
  12  -6  -8    8.02    4.82
  12   6  -7    1.49    5.00
  12  -6  -7   -8.06    5.54
  12   6  -6   16.34    5.51
  12  -6  -6   36.69    7.58
 -12  -6   6   13.70    5.55
 -12  -6   5   35.06    6.99
  12   6  -5   28.07    7.38
 -12  -6   4  105.93   11.26
  12   6  -4  108.68   11.86
 -12  -6   3   12.44    5.55
  12   6  -3   25.54    6.25
 -12  -6   2  170.47   14.27
  12   6  -2  191.46   15.25
 -12  -6   1   -1.25    5.16
 -12   6   1   -2.16    4.25
 -12   6   0  631.99   26.42
 -12  -6   0  616.91   28.25
 -12  -6  -1   42.85    8.46
 -12   6  -1   56.00    8.25
 -12   6  -2  391.51   21.44
 -12  -6  -2  433.32   23.72
 -12   6  -3   30.18    7.49
 -12  -6  -3   21.01    6.72
 -12  -6  -4  150.68   14.40
 -12   6  -4  162.43   14.16
 -12   6  -5   -0.86    4.35
  12  -7  -9   -0.70    4.50
  12   7  -8  237.36   17.68
  12  -7  -8  188.08   15.33
  12   7  -7   10.55    6.05
 -12  -7   7   15.87    5.33
  12  -7  -7   21.24    6.38
 -12  -7   6  358.60   20.51
  12   7  -6  404.45   22.76
  12  -7  -6  391.42   21.80
  12   7  -5    9.86    5.55
 -12  -7   5    6.59    5.07
 -12  -7   4  184.50   14.78
  12   7  -4  175.51   14.76
 -12  -7   3   74.70    9.89
  12   7  -3   60.68    9.13
 -12  -7   2  176.05   14.83
  12   7  -2  194.20   15.27
 -12  -7   1   81.50   10.72
 -12   7   1   64.34    8.38
 -12  -7   0   32.55    7.91
 -12   7   0   36.05    7.10
 -12  -7  -1   10.54    5.89
 -12   7  -1   13.39    5.87
 -12  -7  -2  352.71   21.49
 -12   7  -2  316.29   19.27
 -12   7  -3    3.76    4.72
 -12  -7  -3    8.29    5.24
  12  -8  -9   56.72    8.80
  12   8  -8   54.78    9.29
 -12  -8   8   56.34    9.01
  12  -8  -8   51.97    8.82
  12   8  -7    5.75    4.78
 -12  -8   7   12.38    5.74
  12  -8  -7    6.04    5.53
  12   8  -6   21.77    7.41
 -12  -8   6   53.39    8.67
  12   8  -5   11.37    6.21
 -12  -8   5   12.53    5.10
  12   8  -4   48.24    8.40
 -12  -8   4   60.75    9.68
 -12  -8   3  157.45   13.93
  12   8  -3  158.28   14.10
 -12  -8   2   16.71    5.96
  12   8  -2    3.42    4.47
 -12  -8   1  105.26   11.70
 -12  -8   0  271.47   18.67
 -12  -8  -1  143.33   14.06
 -12  -8  -2   90.45   11.59
 -12  -8  -3   84.52   11.34
 -12  -9   8   25.48    6.92
  12  -9  -8   28.92    6.47
 -12  -9   7   50.84    8.48
  12   9  -7   49.38    8.63
 -12  -9   6  101.32   11.66
  12   9  -6  112.26   12.45
 -12  -9   5  428.77   23.52
  12   9  -5  451.21   23.96
  12   9  -4   53.07    9.15
 -12  -9   4   37.85    7.67
 -12  -9   3  242.12   17.70
  12   9  -3  232.66   17.04
 -12  -9   2   17.15    6.73
  12   9  -2    4.55    4.30
 -12  -9   1   42.95    8.92
 -12  -9   0    6.07    5.32
 -12  -9  -1   13.00    6.93
 -12  -9  -2   12.53    6.23
 -12 -10   8   10.82    5.65
 -12 -10   7   11.12    5.99
  12  10  -7   21.26    5.99
 -12 -10   6    8.58    6.13
  12  10  -6    8.34    5.68
 -12 -10   5   13.50    6.09
  12  10  -5    7.48    6.12
  12  10  -4    1.10    4.90
 -12 -10   4    1.20    4.91
 -12 -10   3  436.25   24.00
  12  10  -3  438.10   23.21
  12  10  -2    7.72    5.24
 -12 -10   2   14.47    5.50
 -12 -10   1  118.21   12.99
 -12 -10   0   28.35    7.45
 -12 -10  -1  306.01   20.41
 -12 -11   7  133.35   13.37
 -12 -11   6  100.53   12.09
  12  11  -6   86.63   11.10
 -12 -11   5  504.09   26.50
  12  11  -5  501.66   25.73
 -12 -11   4   34.04    8.15
  12  11  -4   22.10    6.57
 -12 -11   3   89.70   11.42
  12  11  -3   83.76   10.51
[truncated: 155,892 more chars]
