# Supplementary material
Source: MDPI journal article supplement (https://www.mdpi.com/2304-6740/9/5/34)
Supplement: s1 [file s1 › inorganics-1184848-supplementary/Comp2.cif]

 
data_vvm89_a
 
_audit_creation_method            'SHELXL-2018/3'
_shelx_SHELXL_version_number      '2018/3'
_chemical_name_systematic         ?
_chemical_name_common             ?
_chemical_melting_point           ?
_chemical_formula_moiety          ?
_chemical_formula_sum
 'C36 H52 Cl4 N8 O2 Ru2' 
_chemical_formula_weight          972.91

loop_
 _atom_type_symbol
 _atom_type_description
 _atom_type_scat_dispersion_real
 _atom_type_scat_dispersion_imag
 _atom_type_scat_source
 'C'  'C'   0.0033   0.0016
 'International Tables Vol C Tables 4.2.6.8 and 6.1.1.4'
 'H'  'H'   0.0000   0.0000
 'International Tables Vol C Tables 4.2.6.8 and 6.1.1.4'
 'N'  'N'   0.0061   0.0033
 'International Tables Vol C Tables 4.2.6.8 and 6.1.1.4'
 'Cl'  'Cl'   0.1484   0.1585
 'International Tables Vol C Tables 4.2.6.8 and 6.1.1.4'
 'Ru'  'Ru'  -1.2594   0.8363
 'International Tables Vol C Tables 4.2.6.8 and 6.1.1.4'
 'O'  'O'   0.0106   0.0060
 'International Tables Vol C Tables 4.2.6.8 and 6.1.1.4'
 
_space_group_crystal_system       monoclinic
_space_group_IT_number            14
_space_group_name_H-M_alt         'P 21/c'
_space_group_name_Hall            '-P 2ybc'
 
_shelx_space_group_comment
;
The symmetry employed for this shelxl refinement is uniquely defined
by the following loop, which should always be used as a source of
symmetry information in preference to the above space-group names.
They are only intended as comments.
;
 
loop_
 _space_group_symop_operation_xyz
 'x, y, z'
 '-x, y+1/2, -z+1/2'
 '-x, -y, -z'
 'x, -y-1/2, z-1/2'
 
_cell_length_a                    11.7136(4)
_cell_length_b                    10.3400(3)
_cell_length_c                    17.0882(6)
_cell_angle_alpha                 90
_cell_angle_beta                  101.060(4)
_cell_angle_gamma                 90
_cell_volume                      2031.26(12)
_cell_formula_units_Z             2
_cell_measurement_temperature     140(2)
_cell_measurement_reflns_used     4548
_cell_measurement_theta_min       2.52
_cell_measurement_theta_max       29.39
 
_exptl_crystal_description        block
_exptl_crystal_colour             yellow
_exptl_crystal_density_meas       ?
_exptl_crystal_density_method     ?
_exptl_crystal_density_diffrn     1.591          
_exptl_crystal_F_000              992
_exptl_transmission_factor_min    ?
_exptl_transmission_factor_max    ?
_exptl_crystal_size_max           0.21
_exptl_crystal_size_mid           0.19
_exptl_crystal_size_min           0.05
_exptl_absorpt_coefficient_mu     1.050
_shelx_estimated_absorpt_T_min    ?
_shelx_estimated_absorpt_T_max    ?
_exptl_absorpt_correction_type    multi-scan
_exptl_absorpt_correction_T_min   0.99288
_exptl_absorpt_correction_T_max   1.00000
_exptl_absorpt_process_details    
;
CrysAlisPro 1.171.40.84a (Rigaku Oxford Diffraction, 2020)
Empirical absorption correction using spherical harmonics,
implemented in SCALE3 ABSPACK scaling algorithm.
;
_exptl_absorpt_special_details    ?
_diffrn_radiation_probe          x-ray
_diffrn_radiation_source         'fine-focus sealed tube'
_diffrn_radiation_monochromator  graphite
_diffrn_measurement_device       'four-circle diffractometer'
_diffrn_detector                 'CCD plate'
_diffrn_detector_type            AtlasS2
_diffrn_ambient_temperature       140(2)
_diffrn_radiation_wavelength      0.71073
_diffrn_radiation_type            MoK\a
_diffrn_source                    'sealed X-ray tube'
_diffrn_measurement_device_type   'New Xcalibur, AtlasS2'
_diffrn_measurement_method        '\w scans'
_diffrn_detector_area_resol_mean  10.6
_diffrn_reflns_number             10166
_diffrn_reflns_av_unetI/netI      0.0305
_diffrn_reflns_av_R_equivalents   0.0204
_diffrn_reflns_limit_h_min        -14
_diffrn_reflns_limit_h_max        15
_diffrn_reflns_limit_k_min        -12
_diffrn_reflns_limit_k_max        13
_diffrn_reflns_limit_l_min        -16
_diffrn_reflns_limit_l_max        23
_diffrn_reflns_theta_min          1.771
_diffrn_reflns_theta_max          29.063
_diffrn_reflns_theta_full         25.242
_diffrn_measured_fraction_theta_max   0.837
_diffrn_measured_fraction_theta_full  1.000
_diffrn_reflns_Laue_measured_fraction_max    0.837
_diffrn_reflns_Laue_measured_fraction_full   1.000
_diffrn_reflns_point_group_measured_fraction_max   0.837
_diffrn_reflns_point_group_measured_fraction_full  1.000
_reflns_number_total              4548
_reflns_number_gt                 3941
_reflns_threshold_expression      'I > 2\s(I)'
_reflns_Friedel_coverage          0.000
_reflns_Friedel_fraction_max      .
_reflns_Friedel_fraction_full     .
 
_reflns_special_details
;
 Reflections were merged by SHELXL according to the crystal
 class for the calculation of statistics and refinement.
 
 _reflns_Friedel_fraction is defined as the number of unique
 Friedel pairs measured divided by the number that would be
 possible theoretically, ignoring centric projections and
 systematic absences.
;
 
_computing_data_collection        ?
_computing_cell_refinement        ?
_computing_data_reduction         ?
_computing_structure_solution     'SHELXT 2014/5 (Sheldrick, 2014)'
_computing_structure_refinement 'SHELXL-2018/3 (Sheldrick, 2018)'
_computing_molecular_graphics     ?
_computing_publication_material   ?
_refine_special_details           ?
_refine_ls_structure_factor_coef  Fsqd
_refine_ls_matrix_type            full
_refine_ls_weighting_scheme       calc
_refine_ls_weighting_details
'w=1/[\s^2^(Fo^2^)+(0.0256P)^2^+1.4377P] where P=(Fo^2^+2Fc^2^)/3'
_atom_sites_solution_primary      dial
_atom_sites_solution_secondary    difmap
_atom_sites_solution_hydrogens    geom
_refine_ls_hydrogen_treatment     mixed
_refine_ls_extinction_method      none
_refine_ls_extinction_coef        .
_refine_ls_number_reflns          4548
_refine_ls_number_parameters      241
_refine_ls_number_restraints      0
_refine_ls_R_factor_all           0.0348
_refine_ls_R_factor_gt            0.0267
_refine_ls_wR_factor_ref          0.0616
_refine_ls_wR_factor_gt           0.0591
_refine_ls_goodness_of_fit_ref    1.045
_refine_ls_restrained_S_all       1.045
_refine_ls_shift/su_max           0.002
_refine_ls_shift/su_mean          0.000
 
loop_
 _atom_site_label
 _atom_site_type_symbol
 _atom_site_fract_x
 _atom_site_fract_y
 _atom_site_fract_z
 _atom_site_U_iso_or_equiv
 _atom_site_adp_type
 _atom_site_occupancy
 _atom_site_site_symmetry_order  
 _atom_site_calc_flag
 _atom_site_refinement_flags_posn
 _atom_site_refinement_flags_adp
 _atom_site_refinement_flags_occupancy
 _atom_site_disorder_assembly
 _atom_site_disorder_group
Ru1 Ru 0.15675(2) 0.69719(2) 0.43902(2) 0.01206(6) Uani 1 1 d . . . . .
Cl1 Cl 0.08983(4) 0.47840(5) 0.41383(3) 0.01785(12) Uani 1 1 d . . . . .
N1 N 0.58845(15) 0.47600(17) 0.67203(11) 0.0143(4) Uani 1 1 d . . . . .
C1 C 0.66382(18) 0.4723(2) 0.62157(12) 0.0139(4) Uani 1 1 d . . . . .
H1 H 0.683424 0.544017 0.592010 0.017 Uiso 1 1 calc R U . . .
N2 N 0.70648(15) 0.35435(18) 0.61920(10) 0.0142(4) Uani 1 1 d . . . . .
C2 C 0.6538(2) 0.2797(2) 0.66889(15) 0.0237(5) Uani 1 1 d . . . . .
H2 H 0.666313 0.189711 0.678154 0.028 Uiso 1 1 calc R U . . .
N3 N 0.40565(14) 0.58965(17) 0.64204(10) 0.0137(4) Uani 1 1 d . . . . .
C3 C 0.5818(2) 0.3542(2) 0.70230(15) 0.0243(5) Uani 1 1 d . . . . .
H3 H 0.535583 0.327533 0.739413 0.029 Uiso 1 1 calc R U . . .
N4 N 0.26087(15) 0.62203(17) 0.54233(10) 0.0145(4) Uani 1 1 d . . . . .
C4 C 0.52344(17) 0.5890(2) 0.68890(13) 0.0148(4) Uani 1 1 d . . . . .
H4A H 0.564527 0.668090 0.677002 0.018 Uiso 1 1 calc R U . . .
H4B H 0.519909 0.590128 0.746318 0.018 Uiso 1 1 calc R U . . .
C5 C 0.30811(18) 0.5392(2) 0.66468(13) 0.0166(5) Uani 1 1 d . . . . .
H5 H 0.304102 0.498153 0.713827 0.020 Uiso 1 1 calc R U . . .
C6 C 0.21900(19) 0.5600(2) 0.60256(13) 0.0166(4) Uani 1 1 d . . . . .
H6 H 0.140318 0.535697 0.600756 0.020 Uiso 1 1 calc R U . . .
C7 C 0.37331(19) 0.6382(2) 0.56803(13) 0.0156(4) Uani 1 1 d . . . . .
H7 H 0.424401 0.678550 0.538494 0.019 Uiso 1 1 calc R U . . .
C8 C 0.1468(2) 0.8792(2) 0.50215(14) 0.0203(5) Uani 1 1 d . . . . .
C9 C 0.04595(19) 0.8032(2) 0.50598(14) 0.0187(5) Uani 1 1 d . . . . .
H9 H 0.035551 0.768695 0.558830 0.022 Uiso 1 1 calc R U . . .
C10 C -0.02240(18) 0.7530(2) 0.43698(13) 0.0158(4) Uani 1 1 d . . . . .
H10 H -0.080007 0.683849 0.442467 0.019 Uiso 1 1 calc R U . . .
C11 C 0.00334(19) 0.7773(2) 0.35940(13) 0.0158(4) Uani 1 1 d . . . . .
C12 C 0.10053(19) 0.8555(2) 0.35638(14) 0.0179(5) Uani 1 1 d . . . . .
H12 H 0.130656 0.858203 0.305473 0.021 Uiso 1 1 calc R U . . .
C13 C 0.1727(2) 0.9059(2) 0.42680(15) 0.0202(5) Uani 1 1 d . . . . .
H13 H 0.250074 0.943852 0.423299 0.024 Uiso 1 1 calc R U . . .
C14 C 0.2243(2) 0.9234(3) 0.57822(16) 0.0315(6) Uani 1 1 d . . . . .
H14A H 0.194800 1.005169 0.595510 0.047 Uiso 1 1 calc R U . . .
H14B H 0.303524 0.936019 0.568945 0.047 Uiso 1 1 calc R U . . .
H14C H 0.224882 0.857795 0.619685 0.047 Uiso 1 1 calc R U . . .
C15 C -0.0711(2) 0.7144(2) 0.28741(14) 0.0204(5) Uani 1 1 d . . . . .
H15 H -0.095754 0.628009 0.304591 0.024 Uiso 1 1 calc R U . . .
C16 C -0.0068(2) 0.6915(3) 0.21913(15) 0.0284(6) Uani 1 1 d . . . . .
H16A H -0.057863 0.645533 0.175869 0.043 Uiso 1 1 calc R U . . .
H16B H 0.062904 0.639484 0.238187 0.043 Uiso 1 1 calc R U . . .
H16C H 0.015855 0.774816 0.199397 0.043 Uiso 1 1 calc R U . . .
C17 C -0.1816(2) 0.7951(3) 0.26040(16) 0.0310(6) Uani 1 1 d . . . . .
H17A H -0.231506 0.752288 0.215229 0.046 Uiso 1 1 calc R U . . .
H17B H -0.160211 0.881238 0.244146 0.046 Uiso 1 1 calc R U . . .
H17C H -0.223501 0.803158 0.304565 0.046 Uiso 1 1 calc R U . . .
Cl1_2 Cl 0.57496(6) 0.93661(6) 0.64347(3) 0.02726(14) Uani 1 1 d . . . . .
O1_3 O 0.6060(2) 0.7292(2) 0.52399(13) 0.0440(5) Uani 1 1 d . . . . .
H1D_3 H 0.611(3) 0.801(3) 0.5602(18) 0.066 Uiso 1 1 calc R U . . .
C1_3 C 0.6541(3) 0.7637(3) 0.4597(2) 0.0482(8) Uani 1 1 d . . . . .
H1A_3 H 0.733077 0.796493 0.478509 0.072 Uiso 1 1 calc R U . . .
H1B_3 H 0.606493 0.831175 0.429029 0.072 Uiso 1 1 calc R U . . .
H1C_3 H 0.657016 0.687907 0.425670 0.072 Uiso 1 1 calc R U . . .
 
loop_
 _atom_site_aniso_label
 _atom_site_aniso_U_11
 _atom_site_aniso_U_22
 _atom_site_aniso_U_33
 _atom_site_aniso_U_23
 _atom_site_aniso_U_13
 _atom_site_aniso_U_12
Ru1 0.01045(9) 0.01282(9) 0.01322(9) 0.00088(7) 0.00308(6) 0.00069(7)
Cl1 0.0146(2) 0.0158(3) 0.0238(3) -0.0013(2) 0.0054(2) -0.0027(2)
N1 0.0115(8) 0.0161(9) 0.0165(9) 0.0015(8) 0.0057(7) 0.0014(7)
C1 0.0111(9) 0.0174(10) 0.0135(10) 0.0025(9) 0.0030(8) -0.0008(9)
N2 0.0109(8) 0.0169(9) 0.0152(9) 0.0008(8) 0.0041(7) 0.0005(7)
C2 0.0244(12) 0.0176(12) 0.0332(14) 0.0073(10) 0.0160(11) 0.0022(10)
N3 0.0106(8) 0.0158(9) 0.0149(9) -0.0004(7) 0.0029(7) 0.0002(7)
C3 0.0240(12) 0.0216(12) 0.0321(13) 0.0082(11) 0.0173(11) 0.0036(10)
N4 0.0138(8) 0.0151(9) 0.0145(9) 0.0004(8) 0.0028(7) 0.0020(7)
C4 0.0109(9) 0.0172(11) 0.0153(10) -0.0026(9) 0.0004(8) 0.0015(9)
C5 0.0161(10) 0.0193(11) 0.0158(11) 0.0016(9) 0.0068(9) -0.0007(9)
C6 0.0145(10) 0.0175(11) 0.0186(11) 0.0009(9) 0.0053(9) -0.0020(9)
C7 0.0143(10) 0.0174(11) 0.0155(11) 0.0001(9) 0.0037(9) 0.0009(9)
C8 0.0219(12) 0.0158(11) 0.0228(12) -0.0037(10) 0.0029(10) 0.0053(10)
C9 0.0199(11) 0.0196(11) 0.0178(11) 0.0007(10) 0.0065(9) 0.0065(10)
C10 0.0114(10) 0.0173(10) 0.0199(11) 0.0025(10) 0.0060(8) 0.0049(9)
C11 0.0148(10) 0.0148(11) 0.0175(11) 0.0022(9) 0.0025(9) 0.0067(9)
C12 0.0188(11) 0.0140(11) 0.0223(12) 0.0044(9) 0.0073(9) 0.0048(9)
C13 0.0194(11) 0.0089(10) 0.0326(13) 0.0023(10) 0.0054(10) 0.0011(9)
C14 0.0339(14) 0.0262(13) 0.0311(14) -0.0108(12) -0.0016(12) -0.0013(12)
C15 0.0212(11) 0.0211(12) 0.0180(11) 0.0036(10) 0.0015(9) 0.0011(10)
C16 0.0355(14) 0.0298(14) 0.0199(12) -0.0021(11) 0.0054(11) 0.0025(12)
C17 0.0227(13) 0.0408(16) 0.0257(13) -0.0005(12) -0.0050(11) 0.0065(12)
Cl1_2 0.0358(3) 0.0272(3) 0.0203(3) -0.0036(2) 0.0094(3) -0.0061(3)
O1_3 0.0626(15) 0.0268(10) 0.0511(13) -0.0003(10) 0.0318(12) -0.0003(10)
C1_3 0.068(2) 0.0342(16) 0.051(2) -0.0031(15) 0.0328(18) 0.0011(16)
 
_geom_special_details
;
 All esds (except the esd in the dihedral angle between two l.s. planes)
 are estimated using the full covariance matrix.  The cell esds are taken
 into account individually in the estimation of esds in distances, angles
 and torsion angles; correlations between esds in cell parameters are only
 used when they are defined by crystal symmetry.  An approximate (isotropic)
 treatment of cell esds is used for estimating esds involving l.s. planes.
;
 
loop_
 _geom_bond_atom_site_label_1
 _geom_bond_atom_site_label_2
 _geom_bond_distance
 _geom_bond_site_symmetry_2
 _geom_bond_publ_flag
Ru1 N4 2.0933(18) . ?
Ru1 N2 2.1099(17) 3_666 ?
Ru1 C10 2.170(2) . ?
Ru1 C12 2.179(2) . ?
Ru1 C13 2.180(2) . ?
Ru1 C9 2.183(2) . ?
Ru1 C8 2.183(2) . ?
Ru1 C11 2.197(2) . ?
Ru1 Cl1 2.4059(6) . ?
N1 C1 1.348(3) . ?
N1 C3 1.370(3) . ?
N1 C4 1.453(3) . ?
C1 N2 1.321(3) . ?
C1 H1 0.9500 . ?
N2 C2 1.378(3) . ?
C2 C3 1.348(3) . ?
C2 H2 0.9500 . ?
N3 C7 1.346(3) . ?
N3 C5 1.377(3) . ?
N3 C4 1.456(3) . ?
C3 H3 0.9500 . ?
N4 C7 1.317(3) . ?
N4 C6 1.380(3) . ?
C4 H4A 0.9900 . ?
C4 H4B 0.9900 . ?
C5 C6 1.356(3) . ?
C5 H5 0.9500 . ?
C6 H6 0.9500 . ?
C7 H7 0.9500 . ?
C8 C13 1.406(3) . ?
C8 C9 1.431(3) . ?
C8 C14 1.506(3) . ?
C9 C10 1.392(3) . ?
C9 H9 1.0000 . ?
C10 C11 1.437(3) . ?
C10 H10 1.0000 . ?
C11 C12 1.405(3) . ?
C11 C15 1.511(3) . ?
C12 C13 1.430(3) . ?
C12 H12 1.0000 . ?
C13 H13 1.0000 . ?
C14 H14A 0.9800 . ?
C14 H14B 0.9800 . ?
C14 H14C 0.9800 . ?
C15 C16 1.524(3) . ?
C15 C17 1.534(3) . ?
C15 H15 1.0000 . ?
C16 H16A 0.9800 . ?
C16 H16B 0.9800 . ?
C16 H16C 0.9800 . ?
C17 H17A 0.9800 . ?
C17 H17B 0.9800 . ?
C17 H17C 0.9800 . ?
O1_3 C1_3 1.375(3) . ?
O1_3 H1D_3 0.96(4) . ?
C1_3 H1A_3 0.9800 . ?
C1_3 H1B_3 0.9800 . ?
C1_3 H1C_3 0.9800 . ?
 
loop_
 _geom_angle_atom_site_label_1
 _geom_angle_atom_site_label_2
 _geom_angle_atom_site_label_3
 _geom_angle
 _geom_angle_site_symmetry_1
 _geom_angle_site_symmetry_3
 _geom_angle_publ_flag
N4 Ru1 N2 86.08(7) . 3_666 ?
N4 Ru1 C10 121.16(7) . . ?
N2 Ru1 C10 151.51(8) 3_666 . ?
N4 Ru1 C12 151.64(8) . . ?
N2 Ru1 C12 92.67(8) 3_666 . ?
C10 Ru1 C12 67.59(8) . . ?
N4 Ru1 C13 113.68(8) . . ?
N2 Ru1 C13 96.79(8) 3_666 . ?
C10 Ru1 C13 80.52(9) . . ?
C12 Ru1 C13 38.29(9) . . ?
N4 Ru1 C9 93.05(8) . . ?
N2 Ru1 C9 162.85(8) 3_666 . ?
C10 Ru1 C9 37.30(8) . . ?
C12 Ru1 C9 80.00(8) . . ?
C13 Ru1 C9 67.88(9) . . ?
N4 Ru1 C8 88.90(8) . . ?
N2 Ru1 C8 124.61(8) 3_666 . ?
C10 Ru1 C8 68.63(9) . . ?
C12 Ru1 C8 68.58(9) . . ?
C13 Ru1 C8 37.59(9) . . ?
C9 Ru1 C8 38.25(9) . . ?
N4 Ru1 C11 159.57(7) . . ?
N2 Ru1 C11 114.08(7) 3_666 . ?
C10 Ru1 C11 38.41(8) . . ?
C12 Ru1 C11 37.46(8) . . ?
C13 Ru1 C11 69.05(8) . . ?
C9 Ru1 C11 68.74(8) . . ?
C8 Ru1 C11 82.32(8) . . ?
N4 Ru1 Cl1 85.35(5) . . ?
N2 Ru1 Cl1 85.92(5) 3_666 . ?
C10 Ru1 Cl1 88.08(6) . . ?
C12 Ru1 Cl1 122.87(6) . . ?
C13 Ru1 Cl1 160.88(6) . . ?
C9 Ru1 Cl1 111.10(6) . . ?
C8 Ru1 Cl1 148.48(6) . . ?
C11 Ru1 Cl1 92.51(6) . . ?
C1 N1 C3 107.90(18) . . ?
C1 N1 C4 125.62(18) . . ?
C3 N1 C4 126.45(18) . . ?
N2 C1 N1 110.11(19) . . ?
N2 C1 H1 124.9 . . ?
N1 C1 H1 124.9 . . ?
C1 N2 C2 106.36(18) . . ?
C1 N2 Ru1 124.98(14) . 3_666 ?
C2 N2 Ru1 128.26(15) . 3_666 ?
C3 C2 N2 109.3(2) . . ?
C3 C2 H2 125.3 . . ?
N2 C2 H2 125.3 . . ?
C7 N3 C5 107.83(17) . . ?
C7 N3 C4 125.78(18) . . ?
C5 N3 C4 126.38(18) . . ?
C2 C3 N1 106.3(2) . . ?
C2 C3 H3 126.9 . . ?
N1 C3 H3 126.9 . . ?
C7 N4 C6 106.64(18) . . ?
C7 N4 Ru1 128.15(15) . . ?
C6 N4 Ru1 124.65(14) . . ?
N1 C4 N3 111.85(17) . . ?
N1 C4 H4A 109.2 . . ?
N3 C4 H4A 109.2 . . ?
N1 C4 H4B 109.2 . . ?
N3 C4 H4B 109.2 . . ?
H4A C4 H4B 107.9 . . ?
C6 C5 N3 105.99(19) . . ?
C6 C5 H5 127.0 . . ?
N3 C5 H5 127.0 . . ?
C5 C6 N4 109.10(18) . . ?
C5 C6 H6 125.4 . . ?
N4 C6 H6 125.4 . . ?
N4 C7 N3 110.43(19) . . ?
N4 C7 H7 124.8 . . ?
N3 C7 H7 124.8 . . ?
C13 C8 C9 118.4(2) . . ?
C13 C8 C14 122.0(2) . . ?
C9 C8 C14 119.6(2) . . ?
C13 C8 Ru1 71.08(13) . . ?
C9 C8 Ru1 70.86(13) . . ?
C14 C8 Ru1 127.42(16) . . ?
C10 C9 C8 120.8(2) . . ?
C10 C9 Ru1 70.86(12) . . ?
C8 C9 Ru1 70.89(12) . . ?
C10 C9 H9 118.8 . . ?
C8 C9 H9 118.8 . . ?
Ru1 C9 H9 118.8 . . ?
C9 C10 C11 121.9(2) . . ?
C9 C10 Ru1 71.84(12) . . ?
C11 C10 Ru1 71.81(12) . . ?
C9 C10 H10 118.4 . . ?
C11 C10 H10 118.4 . . ?
Ru1 C10 H10 118.4 . . ?
C12 C11 C10 116.7(2) . . ?
C12 C11 C15 124.2(2) . . ?
C10 C11 C15 119.05(19) . . ?
C12 C11 Ru1 70.58(12) . . ?
C10 C11 Ru1 69.78(12) . . ?
C15 C11 Ru1 128.12(15) . . ?
C11 C12 C13 122.1(2) . . ?
C11 C12 Ru1 71.96(12) . . ?
C13 C12 Ru1 70.88(12) . . ?
C11 C12 H12 118.1 . . ?
C13 C12 H12 118.1 . . ?
Ru1 C12 H12 118.1 . . ?
C8 C13 C12 120.2(2) . . ?
C8 C13 Ru1 71.33(13) . . ?
C12 C13 Ru1 70.83(12) . . ?
C8 C13 H13 119.3 . . ?
C12 C13 H13 119.3 . . ?
Ru1 C13 H13 119.3 . . ?
C8 C14 H14A 109.5 . . ?
C8 C14 H14B 109.5 . . ?
H14A C14 H14B 109.5 . . ?
C8 C14 H14C 109.5 . . ?
H14A C14 H14C 109.5 . . ?
H14B C14 H14C 109.5 . . ?
C11 C15 C16 113.4(2) . . ?
C11 C15 C17 109.42(19) . . ?
C16 C15 C17 111.5(2) . . ?
C11 C15 H15 107.4 . . ?
C16 C15 H15 107.4 . . ?
C17 C15 H15 107.4 . . ?
C15 C16 H16A 109.5 . . ?
C15 C16 H16B 109.5 . . ?
H16A C16 H16B 109.5 . . ?
C15 C16 H16C 109.5 . . ?
H16A C16 H16C 109.5 . . ?
H16B C16 H16C 109.5 . . ?
C15 C17 H17A 109.5 . . ?
C15 C17 H17B 109.5 . . ?
H17A C17 H17B 109.5 . . ?
C15 C17 H17C 109.5 . . ?
H17A C17 H17C 109.5 . . ?
H17B C17 H17C 109.5 . . ?
C1_3 O1_3 H1D_3 109.5 . . ?
O1_3 C1_3 H1A_3 109.5 . . ?
O1_3 C1_3 H1B_3 109.5 . . ?
H1A_3 C1_3 H1B_3 109.5 . . ?
O1_3 C1_3 H1C_3 109.5 . . ?
H1A_3 C1_3 H1C_3 109.5 . . ?
H1B_3 C1_3 H1C_3 109.5 . . ?
 
_refine_diff_density_max    1.081
_refine_diff_density_min   -0.589
_refine_diff_density_rms    0.078

_shelx_res_file
;
TITL vvm89.res in P2(1)/c; 140K; Xcalibur;
    vvm89_a.res
    created by SHELXL-2018/3 at 17:36:01 on 12-Mar-2021
CELL  0.71073  11.7136  10.3400  17.0882   90.000  101.060   90.000
ZERR    3.000   0.0004   0.0003   0.0006    0.000    0.004    0.000
LATT  1
SYMM -X, 1/2+Y, 1/2-Z
SFAC C H N CL RU O
UNIT 72 104 16 8 4 4
ACTA
LIST 4 ! automatically inserted. Change 6 to 4 for CHECKCIF!!
TEMP -133
L.S. 6

OMIT 0
BOND $H
FMAP 2

PLAN 20
WGHT    0.025600    1.437700
FVAR       0.39166
RU1   5    0.156750    0.697186    0.439019    11.00000    0.01045    0.01282 =
         0.01322    0.00088    0.00308    0.00069
CL1   4    0.089828    0.478399    0.413825    11.00000    0.01459    0.01584 =
         0.02384   -0.00125    0.00544   -0.00267
N1    3    0.588454    0.476005    0.672029    11.00000    0.01153    0.01609 =
         0.01653    0.00147    0.00568    0.00140
C1    1    0.663820    0.472288    0.621572    11.00000    0.01110    0.01738 =
         0.01354    0.00250    0.00302   -0.00076
AFIX  43
H1    2    0.683424    0.544017    0.592010    11.00000   -1.20000
AFIX   0
N2    3    0.706483    0.354351    0.619201    11.00000    0.01095    0.01693 =
         0.01525    0.00075    0.00407    0.00049
C2    1    0.653805    0.279652    0.668894    11.00000    0.02440    0.01761 =
         0.03321    0.00729    0.01599    0.00216
AFIX  43
H2    2    0.666313    0.189711    0.678154    11.00000   -1.20000
AFIX   0
N3    3    0.405654    0.589652    0.642040    11.00000    0.01064    0.01585 =
         0.01492   -0.00040    0.00286    0.00018
C3    1    0.581767    0.354175    0.702296    11.00000    0.02398    0.02163 =
         0.03211    0.00822    0.01725    0.00364
AFIX  43
H3    2    0.535583    0.327533    0.739413    11.00000   -1.20000
AFIX   0
N4    3    0.260871    0.622032    0.542331    11.00000    0.01383    0.01508 =
         0.01451    0.00036    0.00278    0.00196
C4    1    0.523437    0.588954    0.688900    11.00000    0.01093    0.01723 =
         0.01532   -0.00256    0.00036    0.00147
AFIX  23
H4A   2    0.564527    0.668090    0.677002    11.00000   -1.20000
H4B   2    0.519909    0.590128    0.746318    11.00000   -1.20000
AFIX   0
C5    1    0.308112    0.539177    0.664684    11.00000    0.01609    0.01932 =
         0.01580    0.00158    0.00684   -0.00065
AFIX  43
H5    2    0.304102    0.498153    0.713827    11.00000   -1.20000
AFIX   0
C6    1    0.219001    0.559965    0.602556    11.00000    0.01447    0.01750 =
         0.01864    0.00088    0.00533   -0.00199
AFIX  43
H6    2    0.140318    0.535697    0.600756    11.00000   -1.20000
AFIX   0
C7    1    0.373307    0.638241    0.568028    11.00000    0.01432    0.01743 =
         0.01547    0.00008    0.00370    0.00094
AFIX  43
H7    2    0.424401    0.678550    0.538494    11.00000   -1.20000
AFIX   0
C8    1    0.146807    0.879172    0.502155    11.00000    0.02191    0.01580 =
         0.02279   -0.00372    0.00294    0.00531
C9    1    0.045954    0.803200    0.505980    11.00000    0.01990    0.01956 =
         0.01781    0.00075    0.00652    0.00655
AFIX  13
H9    2    0.035551    0.768695    0.558830    11.00000   -1.20000
AFIX   0
C10   1   -0.022397    0.753022    0.436985    11.00000    0.01142    0.01727 =
         0.01992    0.00251    0.00599    0.00485
AFIX  13
H10   2   -0.080007    0.683849    0.442467    11.00000   -1.20000
AFIX   0
C11   1    0.003339    0.777269    0.359400    11.00000    0.01483    0.01477 =
         0.01748    0.00217    0.00246    0.00667
C12   1    0.100529    0.855480    0.356384    11.00000    0.01878    0.01398 =
         0.02232    0.00443    0.00732    0.00477
AFIX  13
H12   2    0.130656    0.858203    0.305473    11.00000   -1.20000
AFIX   0
C13   1    0.172675    0.905939    0.426795    11.00000    0.01938    0.00890 =
         0.03262    0.00235    0.00539    0.00110
AFIX  13
H13   2    0.250074    0.943852    0.423299    11.00000   -1.20000
AFIX   0
C14   1    0.224271    0.923403    0.578219    11.00000    0.03391    0.02621 =
         0.03115   -0.01078   -0.00162   -0.00127
AFIX 137
H14A  2    0.194800    1.005169    0.595510    11.00000   -1.50000
H14B  2    0.303524    0.936019    0.568945    11.00000   -1.50000
H14C  2    0.224882    0.857795    0.619685    11.00000   -1.50000
AFIX   0
C15   1   -0.071081    0.714387    0.287410    11.00000    0.02123    0.02105 =
         0.01800    0.00356    0.00153    0.00113
AFIX  13
H15   2   -0.095754    0.628009    0.304591    11.00000   -1.20000
AFIX   0
C16   1   -0.006814    0.691515    0.219125    11.00000    0.03553    0.02979 =
         0.01985   -0.00206    0.00540    0.00250
AFIX 137
H16A  2   -0.057863    0.645533    0.175869    11.00000   -1.50000
H16B  2    0.062904    0.639484    0.238187    11.00000   -1.50000
H16C  2    0.015855    0.774816    0.199397    11.00000   -1.50000
AFIX   0
C17   1   -0.181552    0.795054    0.260398    11.00000    0.02267    0.04078 =
         0.02566   -0.00049   -0.00498    0.00649
AFIX 137
H17A  2   -0.231506    0.752288    0.215229    11.00000   -1.50000
H17B  2   -0.160211    0.881238    0.244146    11.00000   -1.50000
H17C  2   -0.223501    0.803158    0.304565    11.00000   -1.50000
AFIX   0
RESI 2 M002
CL1   4    0.574962    0.936614    0.643470    11.00000    0.03580    0.02724 =
         0.02035   -0.00358    0.00941   -0.00607
RESI 3 M003
O1    6    0.605981    0.729234    0.523986    11.00000    0.06258    0.02682 =
         0.05107   -0.00033    0.03184   -0.00035
AFIX 148
H1D   2    0.611084    0.800568    0.560243    11.00000   -1.50000
AFIX   0
C1    1    0.654094    0.763674    0.459684    11.00000    0.06785    0.03425 =
         0.05093   -0.00312    0.03283    0.00107
AFIX 137
H1A   2    0.733077    0.796493    0.478509    11.00000   -1.50000
H1B   2    0.606493    0.831175    0.429029    11.00000   -1.50000
H1C   2    0.657016    0.687907    0.425670    11.00000   -1.50000
RESI 0
REM #####
AFIX   0
HKLF 4


REM  vvm89.res in P2(1)/c; 140K; Xcalibur;
REM wR2 = 0.0616, GooF = S = 1.045, Restrained GooF = 1.045 for all data
REM R1 = 0.0267 for 3941 Fo > 4sig(Fo) and 0.0348 for all 4548 data
REM 241 parameters refined using 0 restraints

END

WGHT      0.0256      1.4327

REM Highest difference peak  1.081,  deepest hole -0.589,  1-sigma level  0.078
Q1    1   0.6928  0.7585  0.5383  11.00000  0.05    1.08
Q2    1   0.2182  0.7846  0.4590  11.00000  0.05    0.55
Q3    1  -0.0069  0.8000  0.4687  11.00000  0.05    0.44
Q4    1   0.5596  0.5223  0.6774  11.00000  0.05    0.41
Q5    1   0.1827  0.7496  0.4076  11.00000  0.05    0.39
Q6    1   0.5879  0.7391  0.4570  11.00000  0.05    0.37
Q7    1   0.1644  0.7213  0.3732  11.00000  0.05    0.37
Q8    1   0.4537  0.5796  0.6613  11.00000  0.05    0.36
Q9    1   0.6264  0.4736  0.6490  11.00000  0.05    0.35
Q10   1   0.7550  0.2866  0.5872  11.00000  0.05    0.34
Q11   1  -0.0840  0.7174  0.4500  11.00000  0.05    0.34
Q12   1   0.3595  0.5669  0.6598  11.00000  0.05    0.34
Q13   1  -0.0417  0.6979  0.2529  11.00000  0.05    0.34
Q14   1   0.0782  0.7808  0.5111  11.00000  0.05    0.33
Q15   1   0.7571  0.3525  0.5973  11.00000  0.05    0.33
Q16   1   0.3111  0.6369  0.5526  11.00000  0.05    0.32
Q17   1   0.0614  0.7877  0.3567  11.00000  0.05    0.31
Q18   1   0.1702  0.8945  0.5416  11.00000  0.05    0.31
Q19   1   0.6371  0.9509  0.6678  11.00000  0.05    0.30
Q20   1   0.2398  0.6215  0.5833  11.00000  0.05    0.30
;
_shelx_res_checksum   35897

_shelx_hkl_file
;
   0   0   2 3897.01   49.29
   0   0  -2 3876.68   49.28
   0   0   3    0.36    2.05
   0   0  -3    0.28    1.79
   0   0  -4 1429.36   22.43
   0   0   4 1465.97   22.61
   0   0   5   -3.16    3.05
   0   0   6  950.69   18.55
   0   0   7   -0.13    3.00
   0   0   8 2466.09   39.90
   0   0   9   -0.97    3.16
   0   0 -10 1629.87   31.87
   0   0  10 1626.90   31.39
   0   0 -11    2.62    3.31
   0   0  11    4.57    3.56
   0   0 -12   13.49    4.19
   0   0  12   13.05    4.04
   0   0 -13   -1.30    3.32
   0   0  13   -0.01    3.53
   0   0  14 1426.49   32.74
   0   0  15    4.34    4.19
   0   0  16  556.29   20.34
   0   0  17    1.92    4.27
   0   0  18  115.90   10.34
   0   0  19   -6.16    4.71
   0   0  20   30.65    6.94
   0   0  21   -4.03    4.98
   0   0  22    1.05    5.19
   0  -1   0    1.11    1.04
   0   1  -1 2081.70   28.56
   0  -1   1 2237.69   28.69
   0  -1  -2 2650.91   34.19
   0   1  -2 2605.14   35.67
   0  -1   2 2636.42   35.67
   0   1   2 2682.00   34.18
   0  -1   3  313.16    7.80
   0   1   3  292.78    6.70
   0  -1  -3  301.60    6.67
   0   1  -3  300.39    7.65
   0  -1   4 1560.07   24.58
   0  -1  -4 1507.41   23.27
   0   1  -4 1532.04   24.47
   0  -1   5  313.87    9.41
   0   1  -5  322.04    9.27
   0  -1  -5  291.53    8.40
   0  -1   6 1035.18   20.30
   0   1   6 1063.86   19.17
   0  -1  -6 1005.80   19.17
   0   1  -6 1047.00   20.19
   0  -1   7 1377.76   25.77
   0   1   7 1398.86   24.65
   0  -1  -7 1364.83   24.79
   0   1  -7 1393.67   25.87
   0  -1  -8   15.90    3.34
   0   1  -8   23.09    3.79
   0  -1   8   16.54    3.77
   0   1   8   15.52    3.47
   0  -1   9  202.20    9.24
   0   1   9  195.90    8.72
   0  -1  -9  182.12    8.53
   0   1  -9  202.86    9.17
   0  -1  10  712.90   18.93
   0   1  10  694.33   18.08
   0   1 -10  735.38   19.11
   0  -1 -10  723.32   18.49
   0  -1  11  183.68    9.81
   0   1  11  176.43    9.13
   0  -1 -11  173.25    9.18
   0  -1  12 1400.54   31.03
   0  -1 -12 1415.71   30.54
   0   1  12 1432.68   30.40
   0  -1  13  107.66    8.60
   0  -1 -13  107.34    8.14
   0   1  13   93.81    7.58
   0  -1  14  954.68   26.06
   0   1  14  964.16   25.42
   0  -1  15   38.34    6.26
   0   1  15   18.98    4.67
   0   1  16   75.98    7.79
   0  -1  16   69.57    7.88
   0   1  17  115.24    9.82
   0  -1  17  107.61    9.63
   0  -1  18  196.16   13.19
   0   1  18  187.00   12.55
   0  -1  19    1.77    4.85
   0   1  19    5.30    4.85
   0  -1  20  462.73   21.56
   0   1  20  473.61   21.11
   0  -1  21   45.24    7.92
   0   1  21   63.16    9.40
   0  -1  22  137.62   13.03
   0   1  22  126.32   12.06
   0   2   0 2002.07   28.08
   0   2   0 2018.58   27.41
   0  -2   1  190.81    5.78
   0   2  -1  186.55    5.62
   0   2  -1  205.86    4.75
   0  -2   1  191.41    4.59
   0  -2   2 1298.18   18.13
   0   2   2 1244.92   18.33
   0   2  -2 1281.10   18.18
   0  -2   2 1248.15   20.58
   0   2  -2 1280.01   20.57
   0  -2  -3  113.54    4.08
   0  -2   3  111.91    3.94
   0   2  -3  108.80    5.09
   0  -2   3  112.98    5.60
   0   2   3  116.35    4.19
   0  -2  -4 4519.12   59.28
   0  -2   4 4563.32   62.50
   0   2  -4 4568.99   62.25
   0   2   4 4522.80   59.38
   0  -2   5  129.40    6.63
   0   2  -5  118.52    6.12
   0   2   5  109.23    5.31
   0  -2  -5  123.60    5.17
   0  -2   6  204.25    8.34
   0   2  -6  199.26    8.23
   0  -2  -6  197.76    7.04
   0  -2  -7   20.22    3.22
   0  -2   7   24.53    4.10
   0   2  -7   31.70    4.15
   0  -2   8 1142.20   24.35
   0   2  -8 1179.73   24.54
   0  -2  -8 1131.74   22.17
   0  -2  -9   18.33    3.48
   0   2   9   18.99    3.45
   0   2  -9   21.64    4.13
   0  -2   9   16.58    4.13
   0  -2  10  892.68   22.40
   0   2 -10  920.59   22.70
   0  -2 -10  907.04   20.80
   0   2  10  886.48   20.64
   0   2  11  103.22    7.11
   0   2 -11   97.42    7.82
   0  -2  11   91.42    7.35
   0  -2 -11   95.83    6.76
   0  -2  12  400.35   15.47
   0   2  12  417.03   14.34
   0  -2 -12  421.95   14.58
   0   2 -12  433.07   15.98
   0  -2  13  623.48   20.38
   0   2  13  623.22   18.90
   0  -2 -13  649.96   19.23
   0  -2  14  154.97   10.51
   0   2  14  166.02    9.95
   0   2  15   30.75    5.09
   0  -2  15   26.92    5.69
   0  -2  16  713.09   24.10
   0   2  16  696.01   22.45
   0  -2  17    3.01    4.46
   0   2  17   13.80    5.14
   0  -2  18  614.54   23.81
   0   2  18  586.60   21.82
   0   2  19  251.87   14.97
   0  -2  19  254.61   15.90
   0  -2  20    9.19    5.58
   0   2  20   13.73    5.40
   0   2  21  176.92   13.56
   0  -2  21  183.01   14.24
   0   2  22  145.46   12.59
   0   3   0    0.70    2.10
   0   3   0    0.78    2.42
   0  -3   1  558.53   12.20
   0   3  -1  556.72   12.09
   0   3  -1  548.69   10.57
   0   3  -2 6270.72   78.72
   0  -3   2 6280.57   82.19
   0   3  -2 6263.25   82.09
   0  -3   2 6092.42   78.74
   0   3   3  605.30   11.47
   0  -3   3  596.10   11.03
   0  -3   3  610.09   14.10
   0   3  -3  602.05   13.86
   0  -3   4  774.41   13.85
   0  -3   4  770.00   16.96
   0   3  -4  778.85   17.06
   0   3   4  794.98   14.15
   0  -3   5   60.07    3.71
   0  -3  -5   63.27    3.98
   0  -3   5   61.51    5.40
   0   3   5   59.85    4.02
   0   3  -5   64.27    4.99
   0  -3  -6  129.11    5.64
   0   3  -6  127.54    7.15
   0  -3   6  129.21    7.31
   0   3   6  127.01    5.80
   0  -3  -7 1292.35   22.95
   0  -3   7 1287.90   26.50
   0   3   7 1223.54   22.97
   0   3  -7 1299.45   26.37
   0  -3  -8  131.80    6.34
   0  -3   8  139.11    8.24
   0   3  -8  137.03    7.94
   0  -3   9 1647.78   33.40
   0   3  -9 1685.49   33.55
   0  -3  -9 1642.07   29.59
   0  -3  10  390.80   14.69
   0  -3 -10  389.09   12.46
   0   3 -10  400.20   14.57
   0  -3  11  949.14   25.07
   0  -3 -11  936.40   21.87
   0   3 -11  983.26   25.28
   0   3  11  959.54   22.30
   0  -3  12 1202.39   29.73
   0  -3 -12 1202.35   26.56
   0   3  12 1230.46   26.98
   0  -3 -13   52.89    5.70
   0  -3  13   48.76    6.50
   0   3  13   52.44    6.02
   0  -3 -14   92.78    7.36
   0  -3  14   96.10    8.78
   0   3  14   92.98    7.72
   0  -3  15  790.58   25.44
   0   3  15  707.84   21.83
   0  -3  16   21.81    5.69
   0   3  16   14.46    5.13
   0  -3  17  430.73   19.64
   0   3  17  407.23   17.19
   0  -3  18    4.37    4.89
   0   3  18   -6.56    5.09
   0   3  19  148.31   11.49
   0  -3  19  142.32   12.28
   0  -3  20    1.18    5.19
   0   3  20    5.68    4.82
   0   3  21   33.35    6.93
   0   4   0  720.34   15.21
   0   4   0  705.06   14.33
   0  -4   1  698.85   15.53
   0   4  -1  710.99   15.50
   0   4   1  703.54   14.81
   0   4  -1  685.33   13.64
   0   4  -2  165.24    5.74
   0   4  -2  157.47    7.00
   0  -4   2  163.88    7.29
   0  -4   2  153.45    5.54
   0   4  -3 1694.90   25.90
   0  -4   3 1687.33   25.67
   0  -4   3 1691.75   29.75
   0   4  -3 1694.82   29.65
   0   4   4   14.38    2.80
   0  -4   4    9.91    2.18
   0  -4   4   10.39    3.68
   0   4  -4    6.69    2.85
   0  -4   5 3049.46   43.25
   0  -4   5 3109.26   49.07
   0   4  -5 3117.02   49.00
   0   4   5 3088.31   43.75
   0  -4   6  182.63    6.52
   0  -4   6  173.77    8.86
   0   4  -6  188.07    9.03
   0   4   6  181.18    6.90
   0  -4   7  170.56    6.81
   0  -4   7  160.32    8.81
   0   4  -7  173.46    8.93
   0   4   7  159.06    6.93
   0  -4   8  229.37    8.36
   0  -4  -8  240.25    8.86
   0  -4   8  241.60   11.23
   0   4   8  226.01    8.80
   0   4  -8  270.07   11.65
   0  -4  -9 1355.79   26.04
   0  -4   9 1347.54   30.42
   0   4  -9 1430.09   30.76
   0  -4 -10   17.69    3.30
   0  -4  10   20.02    4.83
   0   4 -10   25.68    4.93
   0  -4 -11  383.50   12.88
   0  -4  11  391.77   15.91
   0  -4 -12   80.57    6.24
   0  -4  12   78.25    7.89
   0  -4 -13  362.64   13.69
   0  -4  13  352.45   16.28
   0   4  13  376.33   14.17
   0  -4 -14   -3.42    3.06
   0  -4  14   -4.21    4.83
   0   4  14    9.19    4.39
   0  -4  15  178.38   12.46
   0   4  15  181.16   10.85
   0  -4  16   12.73    5.40
   0   4  16   10.89    4.64
   0  -4  17    3.12    5.00
   0   4  17    1.72    4.37
   0  -4  18    6.90    4.86
   0   4  18   17.28    4.98
   0  -4  19  519.78   23.60
   0   4  19  477.79   19.85
   0  -4  20   15.79    6.22
   0   4  20    8.24    5.47
   0   5   0   -1.77    2.53
   0   5   0   -1.27    2.77
   0   5  -1 3313.50   49.68
   0   5   1 3281.16   48.52
   0   5  -1 3208.11   46.49
   0   5   1 3167.41   47.86
   0  -5   2  848.79   19.41
   0   5  -2  819.49   18.95
   0   5   2  839.82   17.89
   0   5  -2  850.85   16.33
   0   5  -3  140.35    5.58
   0   5  -3  146.22    7.62
   0  -5   3  132.51    7.38
   0  -5   3  134.35    5.58
   0   5   4    7.05    2.49
   0  -5   4    4.64    3.20
   0   5  -4    8.17    3.35
   0   5  -4    1.09    2.28
   0  -5   4    5.06    1.79
   0   5   5  728.33   15.04
   0  -5   5  717.15   14.57
   0  -5   5  716.11   19.05
   0   5  -5  748.51   19.14
   0  -5   6  308.64    8.95
   0   5  -6  325.25   12.52
   0  -5   6  302.51   12.32
   0   5   6  325.33    9.51
   0  -5   7 1548.67   26.34
   0  -5   7 1535.79   32.50
   0   5  -7 1606.25   32.78
   0   5   7 1544.91   26.96
   0   5   8    9.87    2.88
   0  -5   8   11.34    2.74
   0  -5   8   13.62    4.25
   0   5  -8    9.23    3.78
   0  -5   9 1323.39   25.15
   0  -5   9 1327.09   30.97
   0   5   9 1317.46   25.90
   0  -5  10   -0.05    3.93
   0  -5  10   -0.28    2.40
   0  -5 -11    2.08    2.89
   0  -5  11    0.10    3.79
   0  -5  11    1.90    2.81
   0  -5 -12    4.48    3.13
   0  -5  12    6.66    4.61
   0  -5  12    0.31    2.62
   0  -5 -13  300.62   12.59
   0  -5  13  296.55   15.26
   0  -5 -14   37.08    5.23
   0  -5  14   28.14    5.94
   0   5  14   30.61    5.09
   0  -5  15  399.96   18.88
   0   5  15  396.17   15.85
   0  -5  16  156.43   12.28
   0   5  16  138.81   10.02
   0  -5  17  277.24   16.77
   0   5  17  261.11   13.77
   0  -5  18   29.67    7.00
   0   5  18   26.41    5.80
   0  -5  19   59.64    9.10
   0   5  19   69.39    8.43
   0   6   0   31.46    3.90
   0   6   0   28.00    3.80
   0   6   1  408.11   12.64
   0   6  -1  402.77   13.07
   0   6   1  388.85   12.18
   0   6  -1  392.11   11.21
   0  -6   2   28.98    4.14
   0   6  -2   33.31    4.50
   0   6   2   31.85    3.85
   0   6  -2   40.13    3.74
   0   6   2   37.40    4.42
   0   6  -3  890.62   17.71
   0  -6   3  846.67   21.34
   0   6  -3  864.95   21.36
   0   6   3  862.98   19.38
   0   6  -4   11.49    3.65
   0  -6   4    4.84    3.81
   0   6  -4    5.16    2.07
   0  -6   4    7.89    2.12
   0   6   5  597.06   13.81
   0   6  -5  580.56   17.64
   0  -6   5  571.05   17.66
   0  -6   5  547.72   13.11
   0   6   6  420.63   11.43
   0  -6   6  415.03   11.13
   0   6  -6  445.23   15.59
   0  -6   6  420.27   15.41
   0  -6   7  745.25   16.27
   0   6  -7  782.19   22.02
   0  -6   7  751.58   21.93
   0   6   7  762.54   16.80
   0  -6   8  192.59    7.63
   0  -6   8  206.49   11.59
   0   6   8  196.46    8.23
   0   6   9   -1.81    2.58
   0  -6   9    6.53    4.36
   0  -6   9    0.03    2.08
   0   6  10   25.28    4.05
   0  -6  10   22.53    5.40
   0  -6  10   25.09    3.51
   0  -6  11  783.85   18.89
   0  -6  11  790.03   25.11
   0  -6  12   16.26    5.73
   0  -6  12    8.63    3.12
   0  -6  13 1356.98   29.12
   0  -6  13 1455.52   37.29
   0  -6  14    3.69    4.57
   0  -6  15  141.62   11.95
   0   6  15  132.38    9.47
   0  -6  16   80.77    9.86
   0   6  16   85.09    7.97
   0  -6  17   35.87    6.79
   0   6  17   24.63    6.01
   0  -6  18  149.58   13.50
   0   6  18  130.01   10.43
   0   7   0    4.98    2.87
   0   7   0    0.77    2.75
   0   7   1   38.53    4.58
   0   7  -1   34.39    4.43
   0   7   1   35.76    4.22
   0   7  -1   35.22    4.14
   0   7   2   56.91    5.20
   0   7  -2   63.63    5.91
   0   7  -2   61.34    5.11
   0   7   2   65.38    5.82
   0   7  -3  257.07    9.21
   0   7   3  257.55   10.28
   0  -7   3  252.31   11.79
   0   7  -3  271.67   11.89
   0   7   3  244.62   10.76
   0   7  -4  191.38    7.91
   0  -7   4  175.44   10.18
   0   7   4  176.47    8.53
   0   7  -4  192.78   10.22
   0   7   5   31.59    3.89
   0  -7   5   20.46    4.73
   0   7  -5   39.86    5.68
   0   7   6  375.17   11.17
   0  -7   6  349.72   10.63
   0  -7   6  358.48   14.87
   0  -7   7  259.66    9.06
   0  -7   7  241.91   12.85
   0   7   7  267.24    9.60
   0  -7   8  127.58    6.30
   0  -7   8  124.55    9.56
   0   7   8  121.33    6.73
   0  -7   9  348.72   11.03
   0  -7   9  338.44   15.97
   0   7   9  346.55   11.83
   0   7  10   22.37    3.96
   0  -7  10   25.06    5.71
   0  -7  10   20.64    3.14
   0  -7  11   21.89    6.37
   0  -7  11   16.63    3.18
   0  -7  12  153.49    8.08
   0  -7  12  158.28   12.32
   0  -7  13   -3.43    5.45
   0  -7  14  483.96   21.95
   0  -7  15   63.47    8.97
   0  -7  16   79.14   10.01
   0   7  16   72.02    7.51
   0  -7  17  336.84   19.46
   0   8   0  736.55   20.64
   0   8   0  704.92   18.51
   0   8   1    3.65    3.17
   0   8  -1    5.99    3.19
   0   8  -1   10.46    3.72
   0   8   1    6.00    3.54
   0   8  -2   62.66    6.24
   0   8   2   69.88    6.27
   0   8  -2   58.93    5.00
   0   8   2   64.53    6.20
   0   8  -3  373.69   12.09
   0   8   3  367.42   13.54
   0   8   3  372.81   14.27
   0  -8   4   34.01    5.79
   0   8   4   23.72    3.64
   0   8   4   28.69    4.66
   0   8  -4   35.24    4.37
   0   8   5  364.17   11.85
   0   8   5  381.78   13.72
   0  -8   5  365.75   15.63
   0   8   6  146.10    7.19
   0  -8   6  141.11   10.19
   0   8   7    6.77    3.13
   0  -8   7    4.41    2.45
   0  -8   7    3.72    4.41
   0  -8   8  258.11    9.47
   0  -8   8  253.64   14.04
   0   8   8  264.77    9.91
   0  -8   9  291.99   10.25
   0  -8   9  304.54   15.57
   0   8   9  297.79   11.03
   0  -8  10  449.37   19.66
   0   8  10  453.11   14.32
   0  -8  11  345.54   17.72
   0  -8  12    4.28    5.22
   0  -8  13   22.76    6.61
   0  -8  14  316.52   18.19
   0  -8  15   42.86    9.11
   0   9   0    2.05    3.06
   0   9  -1   99.93    7.12
   0   9   1   93.32    7.40
   0   9  -2  194.44    9.50
   0   9   2  179.54   10.26
   0   9   2  190.08   10.67
   0   9   3   37.03    4.93
   0   9  -3   24.51    3.89
   0   9   3   23.95    4.47
   0   9  -4 2024.26   36.31
   0   9   4 2044.51   39.93
   0   9   4 1986.76   41.22
   0   9   5    1.18    2.90
   0   9   5   -0.44    2.67
   0   9   5   -0.20    3.31
   0   9   6  751.53   18.37
   0   9   6  732.03   21.13
   0  -9   6  728.68   24.34
   0   9   7   -1.47    2.91
   0   9   7    2.21    2.77
   0  -9   7   -3.34    4.43
   0   9   8   62.63    5.30
   0  -9   8   71.85    8.88
   0  -9   9   65.49    8.66
   0   9   9   86.82    6.23
   0  -9  10  662.97   25.17
   0   9  10  659.10   17.67
   0  -9  11   52.01    8.23
   0  -9  12  385.72   19.85
   0  -9  13   13.10    5.43
   0  -9  14   50.10    8.49
   0  10   0  494.27   16.93
   0  10  -1   42.10    5.34
   0  10   1   57.07    5.95
   0  10   2  331.59   14.33
   0  10  -2  336.00   13.21
   0  10   3  378.79   16.02
   0  10  -3  356.84   13.31
   0  10   4  120.10    9.12
   0  10  -4  135.91    8.02
   0  10   5  133.25    9.98
   0  10   5  148.72    8.25
   0  10   6  323.72   15.96
   0  10   6  359.49   12.36
   0  10   7   -0.60    4.03
   0  10   7    3.01    3.34
   0 -10   8  638.73   24.54
   0  10   8  632.11   16.96
   0 -10   9    7.05    5.22
   0 -10  10  116.50   11.60
   0 -10  11  136.26   12.59
   0 -10  12    1.93    6.04
   0  11   0   -2.46    3.96
   0  11  -1   41.13    5.17
   0  11   1   41.29    6.27
   0  11  -2  251.63   11.78
   0  11   2  232.90   12.64
   0  11   3    6.43    4.40
   0  11  -3   -2.17    4.18
   0  11  -4   68.34    5.79
   0  11   4   74.00    8.12
   0  11   5   20.70    4.85
   0  11   6   74.04    8.42
   0  11   7    2.34    4.50
   0  11   8   83.59    9.22
   0  11   9  112.90   10.71
   0  11  10   31.11    6.84
   0 -11  10   42.68    7.62
   0  12   0  366.44   15.63
   0  12   1   -0.86    4.19
   0  12  -1   10.49    5.43
   0  12   2  116.54    9.86
   0  12   3   73.08    7.69
   0  12   4   17.27    5.77
   0  12   5  264.00   15.19
   0  12   6   31.58    6.69
   0  12   7  113.34   10.89
   0  12   8   82.58    9.44
   0  12   9   -3.65    5.40
   0  12  10   61.05    9.15
   0  13   4   21.77    5.76
   0  13   5  155.00   12.34
   0  13   6   28.61    5.97
   0  13   7  195.20   14.10
   0  13   8   32.66    6.98
  -1   0  23   -7.18    6.30
  -1   0  22  161.11   12.90
  -1   0  21   12.45    5.91
  -1   0  20  159.90   12.34
  -1   0  19    3.59    5.12
  -1   0  18   -2.15    4.40
  -1   0  17   -0.41    4.05
  -1   0  16   48.51    6.65
  -1   0  15    0.97    3.71
  -1   0  14 1647.70   34.90
  -1   0  13    2.15    3.51
  -1   0  12 1298.65   28.10
  -1   0  11   -1.00    3.15
  -1   0  10  750.20   18.35
  -1   0   9    1.86    2.99
   1   0  -9    0.76    2.74
  -1   0   8  841.74   17.97
   1   0  -8  841.13   17.88
   1   0  -7    3.92    2.48
  -1   0   7   -0.08    2.74
  -1   0   6 5174.47   68.69
   1   0  -6 5090.03   68.59
   1   0  -5    0.66    2.23
  -1   0   5    1.06    2.52
  -1   0   4    4.92    2.24
   1   0  -4    5.01    1.93
   1   0  -3    2.29    1.60
  -1   0   3    1.03    1.69
   1   0  -2  149.25    3.49
  -1   0   2  127.94    3.54
  -1   0   1    4.12    1.11
  -1   0   0  947.07   13.51
  -1   0  -1    1.76    1.33
   1   0   1    1.71    1.51
  -1   0  -2 9985.01  123.78
   1   0   2 9999.00  123.85
  -1   0  -3    1.47    2.24
   1   0   3    1.89    2.79
   1   0   4 2811.72   40.32
  -1   0  -4 2774.15   40.13
  -1   0  -5    2.60    2.81
   1   0   5    2.35    3.41
  -1   0  -6 2880.71   43.89
   1   0   6 2911.24   43.97
  -1   0  -7    2.48    2.90
   1   0   7    0.84    3.14
   1   0   8  435.70   13.36
  -1   0  -8  447.76   13.49
  -1   0  -9    0.52    2.89
   1   0   9   -3.50    3.34
  -1   0 -10  321.16   12.44
   1   0  10  304.68   12.28
  -1   0 -11   -2.58    3.31
   1   0  11    6.17    3.99
   1   0  12  263.96   12.32
  -1   0 -12  266.73   12.52
   1   0  13    4.35    3.96
   1   0  14   -0.07    3.93
   1   0  15   -3.81    4.39
   1   0  16  236.25   13.74
   1   0  17    0.29    4.43
   1   0  18  746.89   26.38
   1   0  19   -2.44    5.03
   1   0  20  257.41   16.42
   1   0  21   -3.36    5.30
  -1   1  23   -8.65    5.46
  -1   1  22   23.16    6.65
  -1  -1  22   28.29    7.11
  -1  -1  21   27.76    7.41
  -1   1  21   19.25    5.94
  -1  -1  20   86.73    9.79
  -1   1  20   78.56    8.48
  -1  -1  19   92.98    9.89
  -1   1  19   95.87    9.47
  -1   1  18  728.19   24.09
  -1  -1  18  766.28   25.71
  -1   1  17  241.43   13.08
  -1  -1  17  249.39   13.86
  -1  -1  16 1013.31   28.20
  -1   1  16  992.79   26.85
  -1   1  15  104.99    8.50
  -1  -1  15   90.43    8.10
   1  -1 -14    1.53    3.46
  -1   1  14    1.52    3.27
  -1  -1  14    1.25    3.81
  -1  -1  13  104.32    7.88
  -1   1  13  111.09    7.77
   1  -1 -13  105.10    7.66
  -1  -1  12 1040.23   25.17
   1  -1 -12 1046.80   24.74
   1   1 -12 1094.85   25.51
  -1   1  12 1065.37   24.18
   1  -1 -11    7.34    3.18
  -1  -1  11    4.38    3.24
   1   1 -11    8.63    3.48
  -1   1  11    5.34    3.08
  -1  -1  10 1043.60   23.38
  -1   1  10 1056.20   22.16
   1   1 -10 1102.46   23.75
   1  -1 -10 1015.60   22.68
  -1  -1   9  166.95    8.27
   1   1  -9  176.91    8.35
  -1   1   9  173.65    7.70
  -1  -1   8  421.21   12.47
   1   1  -8  429.48   12.49
  -1   1   8  423.26   11.51
  -1  -1   7   14.23    3.39
   1   1  -7   13.18    3.10
  -1   1   7   14.72    2.85
   1   1  -6   60.22    4.43
  -1   1   6   59.50    3.97
  -1  -1   6   54.29    4.71
  -1  -1   5 3562.08   49.45
   1   1  -5 3421.62   49.21
  -1   1   5 3548.13   46.93
   1   1  -4   91.06    4.49
  -1  -1   4   93.13    4.88
  -1   1   4   94.86    3.61
   1   1  -3    1.42    1.94
  -1  -1   3    2.82    2.50
  -1   1   3   -1.88    1.36
   1   1  -2 8746.40  109.93
  -1  -1   2 8924.05  109.71
  -1   1   1    2.66    1.88
   1  -1  -1    1.61    1.57
   1  -1   0 5291.85   66.65
  -1   1   0 5315.17   66.63
   1  -1   0 5295.34   65.47
  -1   1   0 5276.71   65.46
   1  -1   1   89.25    3.51
  -1   1  -1   98.21    3.81
   1  -1   1   97.91    3.62
  -1   1  -1   96.13    3.41
  -1  -1  -2    5.41    2.25
   1   1   2    0.58    2.36
   1  -1   2    7.01    2.58
  -1   1  -2    4.90    1.96
  -1  -1  -3  729.75   13.55
  -1   1  -3  724.05   13.93
   1  -1   3  746.61   14.22
   1   1   3  713.98   13.50
   1   1   4 3272.28   46.08
  -1   1  -4 3297.63   46.78
  -1  -1  -4 3265.88   45.91
   1  -1   4 3322.49   47.06
   1  -1   5  118.27    6.72
  -1  -1  -5  132.02    5.89
  -1   1  -5  138.57    6.48
   1   1   5  121.52    6.36
  -1  -1  -6 1238.77   22.91
   1  -1   6 1233.84   23.95
  -1   1  -6 1273.58   23.74
  -1  -1  -7  417.26   12.20
   1  -1   7  425.16   12.89
  -1  -1  -8 2700.50   43.58
   1  -1   8 2714.97   44.69
   1   1   8 2717.54   43.64
  -1  -1  -9  485.34   14.53
   1   1   9  478.19   14.55
   1  -1   9  494.92   15.23
  -1   1  -9  479.58   15.11
  -1   1 -10   93.15    7.12
   1  -1  10   97.27    7.28
  -1  -1 -10   93.78    6.64
   1   1  10   97.78    7.05
  -1  -1 -11   47.28    5.50
  -1   1 -11   40.16    5.05
   1   1  11   42.02    5.37
   1  -1  11   43.83    5.57
   1  -1  12  858.06   23.75
   1   1  12  865.02   23.20
  -1  -1 -12  911.52   23.57
   1   1  13   90.73    7.91
   1  -1  13   86.75    8.14
   1  -1  14 1002.18   27.70
   1   1  14 1009.42   27.24
   1   1  15    8.46    3.86
   1  -1  15   17.96    5.62
   1  -1  16  365.82   17.24
   1   1  16  373.51   16.92
   1  -1  17    6.23    5.26
   1   1  17   15.61    5.38
   1   1  18  160.70   12.21
   1  -1  18  137.20   11.50
   1  -1  19   87.23   10.28
   1   1  19   78.48   11.46
   1   1  20    2.97    4.88
   1  -1  20   25.11    6.61
   1  -1  21   24.37    7.03
   1   1  21   38.75    8.06
   1   1  22  385.44   20.73
  -1   2  22  193.41   13.84
  -1  -2  22  213.17   15.56
  -1  -2  21   28.46    6.97
  -1   2  21   28.85    6.52
  -1   2  20  171.66   12.37
  -1  -2  20  201.48   14.30
  -1  -2  19  481.91   21.15
  -1   2  19  438.95   18.69
  -1  -2  18   23.89    5.97
  -1   2  18   21.77    5.69
  -1  -2  17  226.90   13.79
  -1   2  17  229.36   12.36
  -1  -2  16  666.28   22.81
  -1   2  16  662.94   21.03
  -1  -2  15    5.81    4.49
  -1   2  15    0.24    3.58
  -1  -2  14 1348.84   32.29
  -1   2  14 1339.37   29.58
   1  -2 -14 1312.52   30.02
  -1  -2  13  161.31   10.09
  -1   2  13  148.06    8.74
   1  -2 -13  150.77    8.71
   1  -2 -12   28.02    4.34
  -1  -2  12   35.48    5.13
   1   2 -12   33.80    4.99
  -1   2  12   33.97    4.70
  -1  -2  11  926.79   23.23
   1  -2 -11  887.72   21.07
   1   2 -11  924.85   23.12
  -1   2  11  889.18   20.56
  -1  -2  10  158.22    8.83
   1   2 -10  167.39    8.84
  -1   2  10  160.83    7.58
   1  -2 -10  161.12    7.79
  -1  -2   9 1273.62   26.62
   1   2  -9 1306.97   26.87
   1  -2  -9 1235.24   23.99
  -1   2   9 1273.40   23.74
  -1  -2   8  335.39   11.58
   1  -2  -8  313.40    9.83
   1   2  -8  326.65   11.31
  -1   2   8  322.65    9.48
   1  -2  -7   18.04    2.81
  -1  -2   7   20.25    4.06
   1   2  -7   20.04    3.68
  -1   2   7   16.30    2.67
  -1  -2   6  135.36    7.03
   1   2  -6  130.37    6.57
   1  -2  -6  124.82    5.15
   1   2  -5  523.08   12.64
  -1  -2   5  515.42   12.87
   1  -2  -5  479.83    9.89
   1   2  -4 1140.98   20.10
  -1  -2   4 1109.74   20.28
   1  -2  -4 1102.76   16.41
   1  -2  -3   37.54    1.89
  -1   2   3   26.48    1.81
   1   2  -3   31.90    3.39
  -1  -2   3   21.73    3.66
   1   2  -2 1318.51   21.47
  -1  -2   2 1354.90   21.61
   1   2  -1 1398.41   21.45
   1  -2  -1 1339.38   19.06
  -1   2   1 1323.57   19.02
  -1   2   1 1375.39   21.34
   1  -2   0 3254.08   42.87
  -1   2   0 3235.61   42.92
  -1   2   0 3268.46   43.87
   1  -2   0 3322.49   43.93
  -1   2  -1 1800.20   26.24
   1  -2   1 1814.16   26.23
   1  -2   1 1814.40   26.37
  -1   2  -1 1814.66   26.34
   1  -2   2    4.40    2.18
  -1   2  -2    7.41    2.99
   1   2   2    4.81    2.74
  -1   2  -2    7.96    2.64
   1  -2   2    2.27    2.69
   1   2   3  220.33    6.99
   1  -2   3  213.27    6.75
   1  -2   3  218.56    7.50
  -1   2  -3  215.20    7.25
  -1  -2  -4  364.59    9.48
   1  -2   4  375.88   10.63
   1   2   4  362.93    9.67
  -1   2  -4  368.39   10.48
  -1  -2  -5 2377.80   35.89
   1  -2   5 2396.22   37.84
   1   2   5 2320.44   35.91
  -1   2  -5 2347.42   37.50
  -1  -2  -6 1197.90   22.38
   1  -2   6 1254.74   24.20
  -1   2  -6 1222.13   23.99
   1   2   6 1161.37   22.40
   1  -2   7  872.74   20.00
  -1   2  -7  858.94   19.89
   1   2   7  815.69   18.53
  -1  -2  -7  839.81   18.33
  -1  -2  -8    7.85    3.47
   1  -2   8    4.16    3.56
  -1   2  -8    8.20    3.46
   1  -2   9  156.04    8.95
  -1  -2  -9  164.61    8.18
  -1   2  -9  178.37    9.12
   1  -2  10 1946.84   38.01
   1   2  10 1898.31   35.83
  -1  -2 -10 1976.22   36.07
  -1   2 -10 1995.88   38.02
   1  -2  11  281.58   12.79
  -1  -2 -11  265.94   11.47
   1   2  11  259.47   11.53
   1  -2  12  818.48   23.48
  -1  -2 -12  822.85   21.95
   1   2  12  788.67   21.86
  -1  -2 -13   13.42    4.53
   1  -2  13   15.37    4.60
   1   2  13   10.46    4.31
   1   2  14   17.60    4.92
   1  -2  14    9.64    4.59
   1  -2  15  299.06   15.25
   1   2  15  293.13   14.52
   1  -2  16  105.81    9.70
   1   2  16   96.76    9.13
   1  -2  17  175.93   12.91
   1   2  17  166.52   11.75
   1  -2  18  355.32   18.32
   1   2  18  373.84   17.69
   1   2  19   24.90    6.39
   1  -2  19   30.03    7.50
   1  -2  20  523.29   23.76
   1   2  20  466.37   21.64
   1   2  21   62.48    9.12
   1   2  22   45.92    9.01
  -1   3  21  634.43   23.83
  -1  -3  21  681.88   27.70
  -1  -3  20  206.17   14.84
  -1   3  20  182.40   12.48
  -1  -3  19   41.57    7.11
  -1   3  19   37.03    6.58
  -1   3  18  131.41    9.75
  -1  -3  18  129.23   11.16
  -1  -3  17  293.77   16.25
  -1   3  17  305.21   14.39
  -1  -3  16   16.12    5.69
  -1   3  16   16.90    4.64
  -1  -3  15  356.63   16.40
  -1   3  15  340.63   13.91
   1  -3 -15  322.94   13.80
   1  -3 -14   39.42    4.89
  -1  -3  14   39.42    6.41
  -1   3  14   33.47    5.12
  -1  -3  13  115.91    9.14
   1  -3 -13  107.78    7.10
  -1   3  13  112.60    7.61
   1  -3 -12    3.08    4.18
  -1  -3  12   -2.63    4.16
  -1   3  12    2.60    2.83
   1  -3 -11   44.00    4.48
  -1  -3  11   54.14    6.36
   1   3 -11   51.49    5.88
  -1   3  11   47.55    4.66
  -1  -3  10  476.28   16.10
   1  -3 -10  458.43   12.98
  -1   3  10  472.34   13.18
   1   3 -10  481.83   15.93
  -1  -3   9  758.00   20.22
   1  -3  -9  787.87   17.05
   1   3  -9  816.23   20.79
   1   3  -8 1125.45   24.56
  -1  -3   8 1095.71   24.21
   1  -3  -8 1077.95   20.12
  -1  -3   7  799.77   19.13
   1   3  -7  802.10   19.48
   1  -3  -7  805.88   15.47
   1  -3  -6  312.98    7.88
   1   3  -6  308.75   10.94
  -1  -3   6  295.85   10.71
  -1  -3   5  619.30   10.92
   1  -3  -5  657.31   11.62
   1   3  -5  671.22   15.79
  -1  -3   5  620.59   15.71
  -1   3   5  597.95   11.45
  -1  -3   4  919.18   13.74
   1   3  -4  936.58   19.27
  -1  -3   4  910.99   19.13
  -1   3   4  926.46   14.17
  -1   3   3   -9.25    2.00
  -1  -3   3    2.43    1.24
  -1  -3   3   -0.18    3.44
   1   3  -3    5.50    2.88
   1   3  -2   33.89    2.17
  -1   3   2   35.02    2.67
  -1  -3   2   29.63    3.88
   1   3  -2   31.33    3.44
  -1   3   1 1017.37   18.82
  -1   3   1 1029.60   16.91
   1   3  -1 1065.45   19.02
  -1   3   0  712.45   13.94
   1  -3   0  688.87   13.81
   1  -3   0  678.21   13.11
  -1   3   0  688.43   13.04
  -1   3  -1   29.81    3.95
   1  -3   1   13.85    2.74
   1  -3   1   19.66    3.34
  -1   3  -1   16.13    2.77
  -1   3  -2   32.40    4.95
   1  -3   2    2.77    2.48
   1  -3   2   12.02    3.55
  -1   3  -2    5.25    2.59
   1   3   3  847.53   16.22
   1  -3   3  838.11   15.76
   1  -3   3  844.36   17.47
  -1   3  -3  837.18   17.27
   1   3   4 1629.80   26.39
   1  -3   4 1554.02   26.11
  -1   3  -4 1668.10   28.64
   1  -3   4 1658.46   28.79
   1  -3   5  404.81   10.89
  -1  -3  -5  412.37   11.12
   1  -3   5  418.67   12.59
  -1   3  -5  420.44   12.40
   1   3   5  423.98   11.27
  -1  -3  -6  616.75   14.66
   1  -3   6  609.86   16.24
  -1   3  -6  621.07   16.36
   1   3   6  605.22   14.54
   1   3   7   30.76    4.14
  -1  -3  -7   27.58    3.80
   1  -3   7   27.08    4.18
  -1   3  -7   28.20    4.41
   1   3   8    9.55    3.64
  -1  -3  -8    4.92    2.52
  -1   3  -8    7.17    3.51
   1  -3   8    5.30    3.74
  -1  -3  -9  592.42   15.95
   1  -3   9  556.15   17.67
  -1   3  -9  608.44   18.22
  -1  -3 -10   23.20    3.99
   1  -3  10   14.31    4.38
  -1   3 -10   15.09    4.01
  -1  -3 -11  658.67   18.63
   1  -3  11  680.13   20.92
  -1  -3 -12    5.15    3.27
   1  -3  12    5.55    3.76
   1   3  12    6.61    4.02
  -1  -3 -13  710.47   21.04
   1  -3  13  723.34   23.19
   1   3  13  745.83   21.68
   1  -3  14  233.02   13.30
   1   3  14  244.58   12.50
   1  -3  15   57.92    7.82
   1   3  15   49.14    6.48
   1  -3  16  234.09   14.39
   1   3  16  243.97   13.56
   1  -3  17  482.57   21.25
   1   3  17  484.93   19.77
   1  -3  18    8.96    6.20
   1   3  18   -4.17    4.97
   1  -3  19  553.40   24.39
   1   3  19  514.03   21.76
   1  -3  20   56.66    8.84
   1   3  20   52.83    8.29
   1   3  21   69.86    9.28
   1   3  22   -7.72    6.64
  -1  -4  20   14.74    6.34
  -1   4  20    3.58    4.22
  -1   4  19  174.46   11.58
  -1  -4  19  184.91   13.83
  -1  -4  18   38.03    7.05
  -1   4  18   36.44    6.01
  -1  -4  17  622.20   24.00
  -1   4  17  558.75   19.39
  -1  -4  16    9.71    5.77
  -1   4  16   10.64    4.48
   1  -4 -15  575.48   18.32
  -1  -4  15  585.35   22.04
  -1   4  15  586.05   18.43
   1  -4 -14  127.10    8.22
  -1  -4  14  129.73   10.05
  -1   4  14  121.03    8.03
   1  -4 -13  101.70    6.83
  -1  -4  13  106.28    8.80
  -1   4  13  109.27    7.46
   1  -4 -12   20.95    3.54
  -1  -4  12   12.49    4.70
  -1   4  12   24.23    4.13
   1  -4 -11  508.51   13.98
  -1  -4  11  466.33   17.13
  -1   4  11  508.92   14.39
   1  -4 -10  126.84    6.40
  -1  -4  10  134.25    8.85
   1   4 -10  135.92    8.91
   1  -4  -9 1206.91   22.65
  -1  -4   9 1217.40   28.12
   1   4  -9 1280.30   28.44
   1  -4  -8  366.00   10.09
  -1  -4   8  375.67   13.75
   1   4  -8  393.74   13.96
  -1  -4   7 2082.77   31.30
  -1  -4   7 2155.77   38.92
   1   4  -7 2208.49   38.86
  -1  -4   6 1395.59   21.39
   1   4  -6 1452.72   28.52
  -1  -4   6 1425.49   28.51
  -1   4   6 1391.37   22.20
  -1  -4   5  116.33    4.00
   1   4  -5  124.81    7.21
  -1  -4   5  111.62    6.94
  -1   4   5  117.76    4.37
  -1   4   4 1090.31   16.39
   1   4  -4 1098.19   22.36
  -1  -4   4 1036.47   22.04
  -1  -4   4  997.89   16.02
   1   4  -3 4938.55   63.20
  -1  -4   3 5004.41   70.43
   1   4  -3 5019.45   70.47
  -1   4   2  168.46    5.88
   1   4  -2  172.45    7.45
   1   4  -2  167.02    5.11
  -1   4   2  169.22    7.28
   1   4  -1 3614.11   52.38
  -1   4   1 3658.75   49.93
   1   4  -1 3445.40   48.03
  -1   4   1 3650.29   51.44
   1   4   0  614.83   14.47
  -1   4   0  621.95   13.48
   1  -4   0  613.62   13.57
  -1   4   0  627.28   13.74
  -1   4  -1  233.94    8.00
   1  -4   1  230.21    8.10
  -1   4  -1  219.54    7.32
   1  -4   1  230.02    7.68
  -1   4  -2  310.16    8.79
   1  -4   2  311.56    9.99
  -1   4  -2  303.06    9.75
   1  -4   2  294.41    8.75
  -1   4  -3   78.99    5.31
   1  -4   3   73.93    5.46
  -1   4  -3   72.65    4.27
   1  -4   3   72.58    4.48
   1   4   4  190.42    7.35
   1  -4   4  186.95    6.94
   1  -4   4  184.55    8.53
  -1   4  -4  202.51    8.58
   1  -4   5 1954.26   32.32
   1   4   5 2037.93   32.88
   1  -4   5 2084.34   36.36
  -1   4  -5 2116.87   36.31
   1  -4   6  201.09    7.92
   1  -4   6  210.67    9.72
   1   4   6  215.20    8.34
  -1   4  -6  222.60    9.93
   1  -4   7 3430.77   52.71
   1  -4   7 3538.54   57.10
  -1   4  -7 3695.01   57.47
   1   4   7 3539.25   53.08
   1  -4   8   93.52    6.06
  -1  -4  -8   98.83    6.25
   1  -4   8   97.23    7.46
  -1   4  -8   97.79    7.29
   1   4   8   95.59    6.44
  -1  -4  -9  604.57   16.50
   1  -4   9  631.40   19.47
  -1   4  -9  612.97   18.93
   1   4   9  578.04   16.46
  -1  -4 -10   66.49    5.76
   1   4  10   60.59    5.98
   1  -4  10   75.21    7.27
  -1  -4 -11  116.91    7.52
   1  -4  11  113.63    9.00
  -1  -4 -12   15.14    3.83
   1  -4  12   11.62    5.07
  -1  -4 -13  677.00   20.40
   1  -4  13  663.84   22.98
   1  -4  14  104.88    9.66
   1   4  14  102.29    8.36
   1  -4  15  219.64   13.91
   1   4  15  209.94   12.07
   1  -4  16    1.77    4.80
   1   4  16    3.20    4.20
   1  -4  17  370.11   19.12
   1   4  17  342.89   16.58
   1  -4  18    1.68    5.08
   1   4  18   -2.91    4.64
   1  -4  19   28.29    7.14
   1   4  19   33.74    6.98
   1   4  20    1.46    5.15
   1   4  21  170.61   13.54
  -1  -5  19   68.34    9.52
  -1  -5  18    7.41    5.94
  -1   5  18    0.90    3.89
  -1  -5  17   -1.94    4.71
  -1   5  17    2.48    3.83
  -1  -5  16   32.80    7.22
  -1   5  16   24.22    5.12
   1  -5 -15  577.87   18.28
  -1  -5  15  630.54   23.49
  -1   5  15  601.42   18.65
   1  -5 -14  144.87    8.63
  -1  -5  14  150.31   11.37
  -1   5  14  164.48    9.42
   1  -5 -13  563.43   16.55
  -1  -5  13  552.51   20.96
  -1   5  13  588.12   17.14
   1  -5 -12    3.28    3.14
  -1  -5  12    2.03    4.09
   1  -5 -11  797.20   18.64
  -1  -5  11  802.06   18.04
  -1  -5  11  826.19   24.41
  -1  -5  10  341.88   10.34
  -1  -5  10  343.03   14.90
  -1  -5   9  201.14    7.19
   1   5  -9  205.75   11.08
  -1  -5   9  194.30   10.92
  -1  -5   8   69.37    3.96
  -1  -5   8   67.63    6.63
   1   5  -8   74.60    6.91
  -1  -5   7 2804.03   39.24
  -1  -5   7 2810.69   48.82
   1   5  -7 2853.60   48.99
  -1   5   7 2746.95   40.31
  -1   5   6    1.75    1.89
  -1  -5   6    3.88    1.60
  -1  -5   6    6.89    3.61
   1   5  -6   -0.85    2.99
  -1  -5   5 2905.69   40.75
   1   5  -5 3131.85   50.04
  -1  -5   5 2970.84   49.49
  -1   5   5 3051.72   41.33
  -1   5   4  445.85    9.50
   1   5  -4  400.56    8.81
   1   5  -4  452.54   14.07
  -1  -5   4  428.31   13.82
   1   5  -3 1366.19   21.25
   1   5  -3 1380.79   27.38
  -1  -5   3 1347.99   27.10
  -1   5   3 1356.74   23.72
  -1   5   3 1368.25   26.71
   1   5  -2   69.96    5.51
  -1   5   2   67.13    4.24
   1   5  -2   75.56    4.00
  -1   5   2   71.97    5.31
  -1   5   1   19.14    2.78
   1   5  -1   25.12    3.75
   1   5  -1   18.93    2.89
  -1   5   1   17.32    2.94
   1   5   0  521.71   14.25
  -1   5   0  517.69   13.19
  -1   5   0  523.74   13.27
   1  -5   1 3207.57   48.95
  -1   5  -1 3272.82   49.23
   1   5   1 3281.30   49.63
  -1   5  -1 3244.70   47.85
   1  -5   1 3189.58   47.76
  -1   5  -2  318.56    9.63
  -1   5  -2  325.51   10.90
   1  -5   2  300.71   10.55
   1  -5   2  311.88    9.63
  -1   5  -3 3769.25   54.06
   1  -5   3 3735.98   57.00
  -1   5  -3 3777.63   57.03
   1  -5   3 3699.92   53.85
   1   5   4   98.33    5.76
  -1   5  -4  106.72    6.22
  -1   5  -4   98.79    6.60
   1  -5   4   90.28    6.60
   1  -5   4   94.77    5.31
   1   5   5  242.34    8.83
   1  -5   5  232.21    8.38
  -1   5  -5  255.65   10.74
   1  -5   5  224.69   10.24
   1   5   6   25.31    3.43
   1  -5   6   25.07    3.44
   1  -5   6   29.86    4.84
  -1   5  -6   22.46    4.09
   1  -5   7  415.36   12.26
   1  -5   7  423.72   15.33
   1   5   7  440.21   12.89
  -1   5  -7  465.13   15.80
   1  -5   8  125.69    7.02
   1  -5   8  133.48    8.98
   1   5   8  128.21    7.17
  -1   5  -8  136.36    9.04
   1  -5   9  503.84   14.83
   1  -5   9  509.80   18.03
   1   5   9  497.50   15.24
   1   5  10   69.80    6.34
   1  -5  10   68.02    7.49
   1  -5  10   63.20    5.62
   1  -5  11  640.88   18.67
   1  -5  11  740.37   23.45
  -1  -5 -12  166.23    9.63
   1  -5  12  159.74    9.42
   1  -5  12  185.96   11.90
  -1  -5 -13  263.56   12.43
   1  -5  13  227.42   11.69
   1  -5  13  286.82   15.23
   1  -5  14   11.37    5.18
   1  -5  15   17.49    6.47
   1   5  15   15.85    4.95
   1  -5  16   61.92    8.48
   1   5  16   73.27    7.92
   1  -5  17  149.43   12.75
   1   5  17  151.75   11.13
   1  -5  18   54.38    8.57
   1   5  18   49.06    7.36
   1   5  19  186.91   13.17
   1   5  20   -3.01    5.60
  -1  -6  18   66.28    9.99
  -1  -6  17  345.89   18.96
  -1   6  17  306.50   14.18
  -1  -6  16    3.37    5.95
  -1   6  16   10.59    4.24
  -1  -6  15   36.84    7.46
  -1   6  15   33.21    5.38
  -1  -6  14  249.61   15.20
  -1   6  14  250.06   11.42
  -1  -6  13   31.10    6.54
  -1  -6  13   44.62    4.73
  -1  -6  12   73.36    5.36
  -1  -6  12   73.76    8.67
  -1  -6  11  164.67    7.05
  -1  -6  11  160.67   11.14
  -1  -6  10   -1.79    3.83
  -1  -6  10    0.87    1.81
  -1  -6   9  868.32   25.09
  -1  -6   9  894.64   17.17
  -1   6   8   49.03    3.98
  -1  -6   8   49.61    3.41
  -1  -6   8   50.31    6.48
  -1   6   7   15.36    2.54
  -1  -6   7   10.28    1.95
  -1  -6   7   15.92    4.69
   1   6  -7   17.85    4.34
  -1   6   6   13.89    2.47
  -1  -6   6    9.39    4.25
   1   6  -6   13.79    3.83
  -1  -6   6   10.22    2.03
  -1   6   5  675.72   13.46
  -1  -6   5  663.29   19.35
   1   6  -5  687.52   19.51
   1   6  -4  555.81   11.91
  -1   6   4  569.02   14.13
   1   6  -4  558.10   16.97
  -1  -6   4  553.71   17.13
   1   6  -3    1.38    3.02
  -1   6   3   -0.77    2.24
   1   6  -3    1.87    2.24
  -1   6   3    0.45    3.14
   1   6  -2  178.99    8.92
  -1   6   2  168.48    7.23
  -1   6   2  168.34    8.38
   1   6  -2  178.69    6.68
   1   6  -1  603.49   16.83
  -1   6   1  597.34   15.34
  -1   6   1  608.67   15.99
   1   6  -1  603.12   13.86
  -1   6   0  654.58   16.55
   1   6   0  687.70   17.77
  -1   6   0  647.96   16.26
   1   6   0  650.45   15.26
   1  -6   1  917.69   21.16
  -1   6  -1  966.56   21.65
   1   6   1  956.33   21.82
  -1   6  -1  965.67   20.37
  -1   6  -2  724.11   16.88
  -1   6  -2  751.38   18.83
   1  -6   2  702.53   18.37
   1  -6   3   11.27    2.68
  -1   6  -3    7.59    2.57
   1  -6   3   16.19    3.88
  -1   6  -3   14.57    3.34
  -1   6  -4  115.56    6.34
  -1   6  -4  117.98    7.44
   1  -6   4  114.94    7.72
   1  -6   4  117.87    6.25
   1   6   5 1101.80   22.50
   1  -6   5 1068.42   21.91
  -1   6  -5 1142.20   26.13
   1  -6   5 1101.36   26.00
   1   6   6   28.29    3.93
   1  -6   6   23.28    3.44
   1  -6   6   26.93    5.14
  -1   6  -6   20.37    4.44
   1  -6   7  524.28   14.34
   1  -6   7  520.24   17.98
  -1   6  -7  563.41   18.47
   1   6   7  528.92   14.75
   1   6   8   40.08    4.85
   1  -6   8   39.42    4.47
   1  -6   8   46.69    6.49
   1  -6   9  357.49   12.35
   1  -6   9  370.37   15.90
   1   6   9  383.06   13.26
   1  -6  10  189.10    9.22
   1  -6  10  210.04   12.21
   1   6  10  192.37    9.81
   1   6  11   71.71    6.55
   1  -6  11   79.80    8.64
   1  -6  11   68.34    6.07
   1  -6  12    6.19    4.89
   1  -6  12    9.80    3.50
   1  -6  13  533.56   17.68
   1  -6  13  536.73   23.44
   1  -6  14    2.98    5.16
   1  -6  15  465.68   21.75
   1  -6  16   24.38    6.99
   1   6  16   18.59    5.51
   1  -6  17  503.93   23.37
   1   6  17  459.30   19.30
   1   6  18   -0.63    5.51
  -1  -7  17    9.31    4.96
  -1  -7  16   79.59   10.36
  -1  -7  15  517.92   22.90
  -1   7  15  524.76   17.37
  -1  -7  14   89.64   10.33
  -1  -7  13  213.35   13.98
  -1  -7  12  320.75   16.66
  -1  -7  11   12.51    2.29
  -1  -7  11   16.88    5.04
  -1  -7  10  198.25    7.25
  -1  -7  10  180.96   11.94
  -1  -7   9   97.71    4.90
  -1  -7   9   97.62    9.02
  -1   7   9   92.00    5.65
  -1   7   8   43.48    3.78
  -1  -7   8   50.95    3.59
  -1  -7   8   48.00    6.64
  -1  -7   7  603.51   20.43
  -1   7   7  624.39   13.79
  -1   7   6    2.76    2.21
  -1  -7   6    1.32    3.77
  -1   7   6    2.09    2.80
  -1   7   5 1197.50   21.16
  -1   7   5 1174.40   24.12
  -1  -7   5 1147.44   28.48
   1   7  -4   65.58    4.53
  -1   7   4   63.37    5.02
   1   7  -4   72.49    6.76
  -1   7   4   54.83    5.75
   1   7  -3  347.75    9.88
  -1   7   3  329.02   11.39
   1   7  -3  344.98   13.59
  -1   7   3  330.04   12.82
  -1   7   2    3.51    2.23
   1   7  -2    6.07    3.41
   1   7  -2    7.12    2.70
  -1   7   2    4.70    2.81
   1   7  -1  132.55    8.07
  -1   7   1  133.14    7.50
  -1   7   1  123.54    7.38
   1   7  -1  117.13    6.21
  -1   7   0  291.54   11.20
   1   7   0  308.91   12.19
  -1   7   0  274.26   10.66
   1   7   0  285.04   10.27
  -1   7  -1  212.05    9.85
   1   7   1  198.50    9.83
  -1   7  -1  198.39    8.95
   1   7   1  183.59    8.53
  -1   7  -2  237.22    9.68
   1  -7   2  227.84   10.60
   1   7   2  227.43   10.40
  -1   7  -2  230.55   10.52
  -1   7  -3   89.17    5.82
   1  -7   3  100.06    7.57
  -1   7  -3  105.86    7.39
   1   7   3  108.33    7.25
   1  -7   4   40.35    4.14
  -1   7  -4   44.10    4.25
   1  -7   4   50.84    5.64
  -1   7  -4   53.89    5.76
   1   7   5  802.88   19.23
  -1   7  -5  873.12   23.31
   1  -7   5  798.53   22.67
   1  -7   5  793.54   18.81
   1   7   6  101.00    6.46
   1  -7   6   88.45    5.88
   1  -7   6   86.91    7.84
   1  -7   7  165.45    7.93
   1  -7   7  159.54   10.30
   1   7   7  171.17    8.42
   1  -7   8  581.74   16.07
   1  -7   8  597.05   20.89
   1   7   8  610.15   16.70
   1  -7   9  287.64   11.18
   1  -7   9  292.99   14.90
   1   7   9  298.92   11.74
   1  -7  10  127.63    7.59
   1  -7  10  130.68   10.48
   1   7  10  125.58    8.08
   1  -7  11 1141.21   25.86
   1  -7  11 1151.25   32.76
   1   7  11 1146.53   26.74
   1  -7  12   39.73    4.96
   1  -7  12   47.53    7.55
   1  -7  13  126.20   11.26
   1  -7  14  147.10   12.78
   1  -7  15    7.62    6.19
   1  -7  16  331.24   19.18
   1   7  17   92.70    9.40
  -1  -8  16  153.76   13.92
  -1  -8  15   38.73    7.44
  -1  -8  14  321.26   18.55
  -1  -8  13    4.83    5.89
  -1  -8  12  382.17   18.93
  -1  -8  11   28.11    6.49
  -1  -8  10   53.77    7.92
  -1  -8   9  438.88   18.98
  -1   8   9  424.24   11.92
  -1  -8   8  699.92   23.82
  -1   8   8  703.27   15.60
  -1   8   7   58.02    4.09
  -1  -8   7   56.75    7.47
  -1   8   7   52.57    5.24
  -1   8   6 1112.72   20.59
  -1  -8   6 1055.23   28.88
  -1   8   6 1070.29   24.17
  -1   8   6 1035.11   27.92
  -1   8   5   12.88    2.69
  -1   8   5    8.51    3.11
  -1   8   5    2.90    3.47
   1   8  -4   82.98    5.25
  -1   8   4   63.21    5.40
  -1   8   4   68.99    6.98
   1   8  -3  376.23   11.26
  -1   8   3  363.94   13.09
  -1   8   3  374.46   14.43
  -1   8   2    2.66    2.55
   1   8  -2    3.38    2.89
  -1   8   2    4.67    3.23
   1   8  -1  591.33   18.84
  -1   8   1  565.92   17.09
   1   8  -1  555.11   15.11
  -1   8   1  548.38   16.99
  -1   8   0   60.79    5.80
   1   8   0   60.55    6.11
   1   8   0   54.31    5.39
  -1   8   0   64.71    6.13
   1   8   1   61.21    6.18
  -1   8  -1   63.80    6.09
  -1   8  -1   54.96    5.25
   1   8   1   49.72    5.03
  -1   8  -2  617.13   17.32
   1   8   2  603.60   17.65
  -1   8  -2  642.45   19.48
   1   8   2  619.70   19.01
  -1   8  -3   40.74    4.22
   1   8   3   51.22    5.65
   1  -8   3   47.56    5.92
  -1   8  -3   50.79    5.79
  -1   8  -4 1475.84   29.65
   1   8   4 1487.15   31.95
   1  -8   4 1464.21   33.50
   1   8   5  210.34    9.53
   1  -8   5  207.91   11.87
   1  -8   5  188.04    8.85
   1   8   6   70.78    5.72
   1  -8   6   66.95    7.70
   1  -8   6   63.00    5.25
   1   8   7  178.25    9.00
   1  -8   7  161.62   11.40
   1  -8   7  155.52    8.27
   1   8   8   38.66    4.81
   1  -8   8   34.21    5.97
   1  -8   8   34.24    4.41
   1   8   9   21.96    4.36
   1  -8   9   26.20    4.08
   1  -8   9   21.68    6.04
   1  -8  10  178.92    9.11
   1  -8  10  198.41   13.38
   1   8  10  191.85    9.76
   1   8  11   28.12    4.87
   1  -8  11   45.93    7.90
   1  -8  12  711.91   26.42
   1   8  12  720.90   21.07
   1  -8  13  102.10   11.04
   1  -8  14  307.76   18.20
   1  -8  15   10.20    6.17
  -1  -9  14   43.06    8.33
  -1  -9  13   32.10    6.89
  -1  -9  12   31.10    6.91
  -1  -9  11   89.52   10.35
  -1  -9  10  553.58   22.99
  -1   9   9    5.32    2.74
  -1   9   9   -0.23    3.28
  -1  -9   9    2.67    5.26
  -1   9   8  878.73   27.90
  -1   9   8  892.32   22.79
  -1  -9   8  880.58   28.29
  -1   9   8  930.28   18.82
  -1   9   7  280.53   14.66
  -1   9   7  289.91   12.18
  -1   9   7  303.26    9.56
  -1   9   6  284.76    9.26
  -1   9   6  279.58   11.88
  -1   9   6  269.92   13.97
  -1   9   5    0.34    2.31
  -1   9   5    1.44    2.50
  -1   9   5   -4.12    3.86
   1   9  -4  271.06    9.79
  -1   9   4  256.23   11.49
  -1   9   4  248.79   12.63
  -1   9   3   -0.82    2.53
   1   9  -3    2.47    3.21
  -1   9   3   -2.17    3.08
  -1   9   2 2402.84   44.75
   1   9  -2 2439.73   40.83
  -1   9   2 2432.84   45.65
  -1   9   1  154.60    9.50
   1   9  -1  150.25    8.18
  -1   9   1  147.70    8.81
  -1   9   0  442.01   16.38
  -1   9   0  439.14   15.58
   1   9   0  428.77   14.50
  -1   9  -1   -1.86    3.66
   1   9   1    1.98    3.30
   1   9   2   -1.94    3.30
  -1   9  -2    5.69    3.76
  -1   9  -3  112.24    7.27
   1   9   3  119.56    8.78
  -1   9  -4  118.92    7.68
   1  -9   4  141.57   10.90
   1   9   4  137.77    9.54
   1   9   5    9.41    3.77
   1  -9   5    6.75    4.54
   1   9   6  932.52   22.73
   1  -9   6  952.21   28.14
   1   9   7  202.91    9.66
   1  -9   7  183.08    9.17
   1  -9   7  177.06   12.31
   1  -9   8  551.12   21.94
   1   9   8  590.46   17.39
   1   9   9   13.20    3.80
   1  -9   9   11.84    5.42
   1   9  10    3.93    3.41
   1  -9  10    5.96    5.23
   1   9  11   -5.62    3.68
   1  -9  11    3.04    4.97
   1  -9  12  192.12   14.45
   1  -9  13    7.41    5.95
   1  -9  14  369.74   20.69
  -1 -10  12  171.73   14.43
  -1 -10  11    3.71    5.61
  -1 -10  10  162.69   13.28
  -1  10  10  171.72   13.29
  -1  10   9   34.42    7.09
  -1  10   8   61.79    7.72
  -1  10   7   19.11    6.16
  -1  10   6  864.45   18.81
  -1  10   6  876.11   27.18
  -1  10   5    4.64    2.60
  -1  10   5    7.90    4.32
   1  10  -4  602.56   16.17
  -1  10   4  572.86   20.48
   1  10  -3  107.59    6.92
  -1  10   3   94.59    8.23
   1  10  -2    7.15    3.24
  -1  10   2    3.19    3.39
   1  10  -1  134.59    8.32
  -1  10   1  152.09   10.02
  -1  10   0  575.71   18.69
   1  10   0  585.60   17.96
  -1  10  -1    5.38    3.50
   1  10   1    6.56    3.92
  -1  10  -2  627.88   19.35
   1  10   2  635.03   19.85
  -1  10  -3   16.03    3.81
   1  10   3   24.12    4.55
  -1  10  -4  823.77   22.22
   1  10   4  803.65   24.40
   1  10   5   35.73    5.61
   1  10   5   26.91    5.94
   1  10   6   89.78    7.13
   1 -10   6   79.73    8.71
   1  10   7    6.19    4.01
   1 -10   7   -2.04    4.60
   1 -10   8   98.51   10.31
   1  10   8  102.44    7.53
   1 -10   9  166.93   13.19
   1  10   9  155.69    9.01
   1 -10  10  737.92   27.90
   1 -10  11   33.63    7.54
   1 -10  12  256.50   17.10
  -1  11  11   52.16    8.85
  -1  11  10  368.73   19.84
  -1  11   9   10.44    6.26
  -1  11   8  206.90   14.26
  -1  11   7   68.33    8.82
  -1  11   6  168.49   12.09
  -1  11   5  163.88   11.36
  -1  11   4  121.33    9.87
  -1  11   3   20.99    4.40
   1  11  -3   25.66    4.38
   1  11  -2   85.97    6.97
  -1  11   2   84.85    8.17
  -1  11   1   21.32    4.95
   1  11  -1   22.84    4.40
  -1  11   0  312.54   14.34
   1  11   0  326.48   13.65
  -1  11  -1  126.69    9.44
   1  11   1  133.49    9.15
  -1  11  -2  354.86   14.59
   1  11   2  347.78   15.20
  -1  11  -3  160.22    9.62
   1  11   3  168.86   10.79
  -1  11  -4   26.46    4.29
   1  11   4   24.54    5.37
   1  11   5   27.60    5.30
   1  11   5   22.49    5.21
   1  11   6  153.34    9.37
   1  11   6  140.27   11.05
   1  11   7   -1.58    4.08
   1 -11   8  182.09   13.96
   1  11   8  188.21   13.12
   1 -11   9  134.29   12.63
   1 -11  10  246.74   16.88
  -1  12  10   16.14    6.76
  -1  12   9   30.31    7.58
  -1  12   8   12.48    5.02
  -1  12   7    2.17    4.64
  -1  12   6   28.35    5.84
  -1  12   5    5.24    3.89
  -1  12   4   76.09    7.92
  -1  12   3   93.90    8.78
  -1  12   2   20.72    5.15
  -1  12   1  172.04   11.33
  -1  12   0  136.75    9.98
  -1  12  -1    5.77    4.10
   1  12   1    2.14    4.03
   1  12   2  133.54    9.99
  -1  12  -2  113.93    8.19
   1  12   3   13.40    7.04
   1  12   4  176.55   12.40
   1  12   5   15.71    5.20
   1  12   6   17.26    4.84
   1  12   7  190.43   13.45
   1  12   8    3.29    4.41
   1  12   9  391.87   20.43
   1  12  10   86.97   10.52
  -1  13   8   64.65    9.00
  -1  13   7  158.45   12.93
  -1  13   6   65.50    8.90
  -1  13   5  286.29   16.49
  -1  13   4   27.43    7.01
  -1  13   3  111.36    9.86
  -1  13   2  361.77   17.32
   1  13   5   34.08    6.48
   1  13   6   33.04    7.47
   1  13   7   47.03    7.67
   1  13   8   47.12    8.25
  -2   0  23   -7.93    5.60
  -2   0  22   -5.70    6.31
  -2   0  21   -1.52    4.84
  -2   0  20  121.65   10.80
  -2   0  19    3.34    4.49
  -2   0  18  698.97   23.38
  -2   0  17    7.10    4.22
  -2   0  16  162.26   10.13
  -2   0  15    4.39    3.99
  -2   0  14  905.85   23.38
  -2   0  13    0.84    3.12
  -2   0  12 1904.06   35.24
   2   0 -11   -1.74    2.47
  -2   0  11    0.73    2.84
  -2   0  10 3116.11   48.48
   2   0 -10 3159.13   48.73
  -2   0   9   -0.36    2.54
   2   0  -9   -2.42    2.27
  -2   0   8  733.99   15.79
   2   0  -8  709.81   15.60
  -2   0   7    0.25    2.45
   2   0  -7    1.81    2.48
  -2   0   6    3.62    2.51
   2   0  -6    3.75    2.30
  -2   0   5    3.12    2.41
   2   0  -5   -0.49    1.94
  -2   0   4 9616.72  118.42
   2   0  -4 9494.29  118.56
  -2   0   3    1.13    1.76
   2   0  -3   -0.15    1.56
  -2   0   3    3.44    2.30
  -2   0   2 5303.84   67.28
   2   0  -2 5292.84   67.38
   2   0  -1    2.51    1.82
  -2   0   1   -1.74    2.20
   2   0   0    2.67    1.92
   2   0   0    3.49    2.32
  -2   0  -1    1.35    2.12
   2   0   1    2.82    2.68
  -2   0  -2  197.44    6.47
   2   0   2  197.89    6.73
  -2   0  -3   -1.72    2.57
   2   0   3   -3.30    3.54
  -2   0  -4 8727.32  113.30
   2   0   4 8811.49  113.72
  -2   0  -5    1.10    3.10
   2   0   5   -6.67    3.96
   2   0   6 4437.51   64.37
  -2   0  -6 4471.80   64.14
  -2   0  -7    2.57    2.90
   2   0   7    1.94    3.43
  -2   0  -8   41.75    4.60
   2   0   8   38.78    4.94
  -2   0  -9    2.93    2.93
   2   0   9   -1.48    3.55
  -2   0 -10 1033.90   24.74
   2   0  10  962.45   24.26
  -2   0 -11   -2.67    3.57
   2   0  11    3.03    4.12
   2   0  12 1161.69   28.89
   2   0  13    2.67    4.21
   2   0  14   12.73    4.50
   2   0  15    0.80    4.52
   2   0  16  107.61   10.22
   2   0  17    1.27    4.58
   2   0  18   52.87    8.00
   2   0  19    2.14    5.24
   2   0  20  203.87   15.23
  -2  -1  23   20.47    6.85
  -2  -1  22   90.42   10.42
  -2   1  22  106.13   10.24
  -2   1  21   25.66    6.09
  -2  -1  21   15.67    5.95
  -2  -1  20   -4.88    5.22
  -2   1  20    6.03    4.67
  -2  -1  19    1.36    4.45
  -2   1  19    4.13    4.86
  -2  -1  18   10.48    4.42
  -2   1  18   15.08    4.74
  -2  -1  17   95.85    8.73
  -2   1  17  108.85    8.75
  -2   1  16  573.61   19.07
  -2  -1  16  612.56   20.68
  -2   1  15  222.96   11.08
  -2  -1  15  223.84   11.91
  -2  -1  14  586.24   18.95
  -2   1  14  588.79   17.71
   2  -1 -14  589.67   18.81
   2   1 -14  634.11   19.44
  -2   1  13  207.62    9.73
  -2  -1  13  205.70   10.53
   2   1 -13  211.33   10.56
  -2  -1  12   31.51    4.82
  -2   1  12   23.79    3.78
   2   1 -12   32.40    4.66
  -2   1  11 2170.05   37.08
  -2  -1  11 2198.44   39.18
   2   1 -11 2262.09   39.63
  -2   1  10  615.44   15.18
  -2  -1  10  644.92   16.92
   2   1 -10  636.97   16.80
  -2  -1   9    2.67    2.94
   2   1  -9    1.71    2.86
  -2   1   9    0.70    2.37
  -2   1   8  776.19   15.66
  -2  -1   8  797.45   17.69
   2   1  -8  783.59   17.63
  -2   1   7  334.24    8.65
   2   1  -7  341.53   10.19
  -2  -1   7  323.81   10.01
  -2   1   6  688.57   12.59
  -2  -1   6  687.18   14.70
   2   1  -6  687.58   14.67
   2  -1  -6  693.98   12.55
  -2  -1   5  123.39    5.69
   2   1  -5  128.63    5.40
  -2   1   5  109.52    3.89
   2  -1  -5  114.72    3.89
   2   1  -4    7.06    2.45
  -2   1   4    5.37    1.48
  -2  -1   4    7.89    2.87
   2  -1  -4    7.67    1.41
  -2  -1   3 1034.92   17.14
   2   1  -3 1018.37   17.09
  -2   1   3 1017.94   17.80
  -2  -1   3 1022.65   14.78
   2   1  -2 3923.76   49.31
   2  -1  -2 3896.43   52.53
  -2   1   2 3883.40   52.56
  -2  -1   2 3968.08   49.30
  -2   1   1  732.38   13.46
   2  -1  -1  732.65   13.31
   2   1  -1  736.14   11.52
   2  -1  -1  731.63   11.26
  -2   1   0 2815.16   38.46
  -2   1   0 2768.40   36.60
   2  -1   0 2729.17   38.36
   2  -1   0 2750.73   36.48
  -2   1  -1   19.22    3.56
   2  -1   1   15.45    2.76
   2  -1   1   19.36    2.81
   2   1   1   15.26    3.32
  -2   1  -1   20.63    2.42
   2  -1   1   20.68    2.80
   2   1   2 8169.39  105.03
  -2  -1  -2 8188.17  105.26
  -2   1  -2 8216.21  104.38
   2  -1   2 8222.71  104.68
   2  -1   2 8285.20  104.48
  -2  -1  -3 1800.78   28.93
  -2   1  -3 1854.37   28.89
   2   1   3 1840.05   29.03
   2  -1   3 1851.26   29.16
  -2  -1  -4  319.90    9.52
  -2   1  -4  318.40    9.62
   2   1   4  308.99    9.78
   2  -1   4  307.10    9.73
   2  -1   5  447.19   12.65
   2   1   5  449.85   12.39
  -2  -1  -5  437.71   11.96
  -2   1  -5  455.32   12.41
   2   1   6    6.35    3.65
  -2   1  -6   17.26    3.89
  -2  -1  -6    6.07    2.82
   2  -1   6   10.05    4.12
   2  -1   7  422.40   13.46
   2   1   7  397.95   12.90
  -2   1  -7  407.32   12.99
  -2  -1  -7  412.44   12.71
  -2  -1  -8  704.51   18.16
   2  -1   8  727.94   19.18
  -2   1  -8  741.85   19.05
  -2   1  -9    1.87    3.05
  -2  -1  -9    1.97    3.16
   2   1   9   -0.40    3.13
   2  -1   9   -7.65    3.87
   2  -1  10  940.39   24.29
   2   1  10  958.48   24.02
  -2   1 -10 1003.36   24.58
  -2  -1 -10  978.46   23.69
  -2  -1 -11   27.70    4.72
  -2   1 -11   28.04    4.90
   2  -1  11   24.32    5.03
   2   1  11   28.73    5.19
   2  -1  12  139.96    9.56
   2   1  12  143.62    9.68
   2  -1  13   47.72    6.58
   2   1  13   38.14    6.07
   2   1  14  154.69   10.71
   2  -1  14  159.89   11.34
   2   1  15  102.25    9.10
   2  -1  15  108.72    9.73
   2  -1  16  352.35   17.45
   2   1  16  369.22   17.56
   2  -1  17   -1.61    5.31
   2   1  17    8.98    4.93
   2  -1  18  463.94   21.54
   2   1  18  477.58   21.28
   2  -1  19  149.41   12.79
   2   1  19  127.72   11.78
   2  -1  20  164.10   13.97
   2   1  20  155.92   13.08
   2   1  21    3.63    5.33
  -2  -2  22  246.71   15.99
  -2  -2  21   50.24    8.34
  -2   2  21   45.82    7.17
  -2   2  20  279.30   14.71
  -2  -2  20  263.29   16.14
  -2  -2  19   13.48    5.30
  -2   2  19    3.41    4.52
  -2  -2  18   52.84    7.62
  -2   2  18   64.35    7.11
  -2  -2  17  126.05   10.26
  -2   2  17  122.03    9.05
  -2  -2  16    0.83    3.85
  -2   2  16   -6.14    3.74
   2  -2 -15   85.21    7.26
  -2  -2  15   86.16    8.15
  -2   2  15   87.49    6.98
  -2  -2  14  940.86   25.55
  -2   2  14  892.99   22.24
   2  -2 -14  897.17   23.27
   2  -2 -13   11.13    3.64
  -2  -2  13   -0.22    3.50
   2   2 -13   10.02    3.79
  -2   2  13    6.61    3.36
  -2   2  12  771.26   18.53
  -2  -2  12  735.01   20.82
   2  -2 -12  745.45   19.03
   2   2 -12  772.88   21.16
   2  -2 -11    4.15    2.76
  -2  -2  11    3.62    3.10
   2   2 -11    8.82    3.24
  -2   2  11    8.00    2.94
  -2  -2  10  589.75   16.74
   2  -2 -10  521.80   14.41
  -2   2  10  576.95   13.95
   2   2 -10  604.68   17.03
  -2  -2   9  116.42    7.31
   2   2  -9  122.09    7.25
  -2   2   9  108.31    5.41
   2  -2  -9  116.65    6.09
   2  -2  -8   23.73    3.26
  -2  -2   8   30.27    4.11
   2   2  -8   23.45    3.65
  -2   2   8   24.18    2.99
  -2  -2   7 1045.48   21.40
   2   2  -7 1020.19   21.16
  -2   2   7 1032.53   17.31
  -2  -2   6    6.61    3.10
   2   2  -6   12.49    3.14
  -2   2   6   13.95    2.06
   2   2  -5   16.57    3.11
  -2  -2   5   17.36    3.77
  -2   2   5   19.07    1.81
   2   2  -4  549.28   12.58
  -2  -2   4  525.97   12.56
  -2   2   3  294.43    9.36
  -2  -2   3  303.44    8.89
   2   2  -3  285.23    8.44
   2  -2  -2  637.15   13.35
  -2   2   2  618.08   13.71
   2   2  -2  638.47   13.32
  -2   2   1  328.52    9.04
   2  -2  -1  336.18    8.91
   2  -2  -1  319.37    6.57
  -2   2   1  346.20    6.00
  -2   2   1  331.84    6.58
  -2   2   0    3.60    3.36
   2  -2   0    1.10    2.48
  -2   2   0    4.63    1.87
   2  -2   0    1.88    2.12
  -2   2   0    6.17    2.17
  -2   2  -1  677.72   14.02
   2  -2   1  660.94   13.73
   2  -2   1  681.82   12.95
  -2   2  -1  683.91   12.89
  -2   2  -1  677.30   12.52
   2   2   2  396.55   10.62
  -2   2  -2  373.67   10.27
   2  -2   2  364.81    9.93
  -2   2  -2  380.08    9.74
   2  -2   2  401.59    9.97
  -2   2  -2  380.09    9.43
   2   2   3 2973.22   43.78
   2  -2   3 2941.12   43.76
  -2   2  -3 2999.17   43.90
   2  -2   3 3053.78   44.06
  -2  -2  -4 1091.57   20.48
   2   2   4 1018.78   20.08
  -2   2  -4 1017.51   20.39
   2  -2   4 1008.73   20.40
   2   2   5   59.03    5.23
  -2  -2  -5   58.81    4.80
  -2   2  -5   55.67    4.87
   2  -2   5   63.73    5.49
  -2  -2  -6  234.08    9.01
   2  -2   6  226.44    9.46
   2   2   6  218.10    9.09
  -2   2  -6  229.18    9.36
  -2   2  -6  208.66    9.25
  -2  -2  -7 1270.96   25.46
  -2   2  -7 1278.76   26.62
  -2   2  -7 1290.12   26.50
   2   2   7 1285.03   25.89
   2  -2   7 1281.00   26.68
  -2  -2  -8  799.23   19.51
   2   2   8  772.74   19.46
   2  -2   8  795.47   20.48
  -2   2  -8  807.44   20.49
  -2  -2  -9  690.89   18.58
   2  -2   9  665.88   19.50
  -2   2  -9  722.99   19.81
  -2   2 -10    8.99    3.68
  -2  -2 -10    4.76    3.19
   2  -2  10    7.97    4.19
   2  -2  11   99.70    8.22
   2   2  11   83.44    7.21
  -2  -2 -11   95.94    7.41
   2  -2  12  970.32   26.64
   2   2  12  948.90   25.38
  -2  -2 -12  991.70   25.54
   2  -2  13  140.65   10.34
   2   2  13  128.32    9.54
   2  -2  14  788.62   25.50
   2   2  14  832.71   24.96
   2   2  15   21.00    5.63
   2  -2  15   25.47    6.12
   2  -2  16  156.50   12.26
   2   2  16  142.35   11.20
   2  -2  17  675.92   25.60
   2   2  17  636.53   23.98
   2  -2  18  140.94   12.74
   2   2  18  120.72   11.10
   2   2  19  141.87   12.31
   2  -2  19  147.29   12.88
   2   2  20  138.72   12.63
   2  -2  20  137.56   12.80
   2   2  21   -4.27    7.21
  -2  -3  21  272.55   17.17
  -2  -3  20  119.42   11.51
  -2   3  20  119.07    9.78
  -2   3  19  694.48   22.52
  -2  -3  19  714.77   26.31
  -2  -3  18   78.21    9.22
  -2   3  18   83.73    7.93
  -2  -3  17  161.10   11.70
  -2   3  17  188.93   10.59
  -2   3  16  530.08   17.33
  -2  -3  16  549.50   20.76
  -2  -3  15  280.44   14.47
  -2   3  15  273.40   11.87
   2  -3 -15  269.81   12.23
   2  -3 -14    3.74    2.82
  -2  -3  14   -3.33    3.98
  -2   3  14   -0.03    2.93
  -2  -3  13  304.64   13.81
   2  -3 -13  317.73   11.82
  -2   3  13  325.96   11.77
  -2  -3  12   69.08    6.80
   2  -3 -12   72.91    5.39
   2   3 -12   71.22    7.02
  -2   3  12   73.00    5.56
  -2  -3  11  820.15   22.26
  -2   3  11  818.21   18.16
   2   3 -11  908.58   23.17
   2  -3 -11  791.10   18.52
   2  -3 -10   31.82    3.61
  -2  -3  10   30.41    4.83
   2   3 -10   41.59    4.83
  -2   3  10   31.65    3.44
  -2  -3   9  201.68    9.80
   2   3  -9  200.63    9.60
  -2   3   9  205.45    7.11
   2  -3  -9  181.99    7.03
  -2  -3   8  587.65   16.48
   2   3  -8  581.03   16.40
  -2   3   8  573.16   12.00
   2  -3  -8  553.95   12.15
   2  -3  -7    0.00    1.61
  -2  -3   7   -1.74    3.17
   2   3  -7    3.80    3.17
  -2  -3   6 1607.46   29.43
   2   3  -6 1610.79   29.58
   2  -3  -6 1586.38   22.80
   2  -3  -5  788.50   11.85
  -2  -3   5  818.94   18.22
   2   3  -5  818.89   18.25
   2   3  -4  163.99    7.41
  -2  -3   4  167.36    7.87
  -2   3   3 1469.59   26.17
  -2   3   3 1444.01   20.17
   2   3  -3 1407.60   25.65
  -2   3   2 1877.16   30.28
  -2   3   2 1770.85   25.34
   2   3  -2 1882.24   30.33
  -2   3   1  690.83   14.74
   2  -3  -1  638.10   14.39
  -2   3   1  628.47   11.68
   2  -3  -1  642.16   11.80
   2  -3   0  708.15   15.19
  -2   3   0  709.66   15.19
   2  -3   0  696.60   13.44
  -2   3   0  728.98   13.58
  -2   3  -1 1137.11   20.72
   2  -3   1 1125.71   20.62
   2  -3   1 1159.99   19.95
  -2   3  -1 1124.52   19.77
  -2   3  -2  972.62   18.83
   2  -3   2  974.35   18.63
   2  -3   2  968.09   18.55
  -2   3  -2  938.10   18.31
   2   3   3  106.77    6.08
   2  -3   3  106.91    5.61
   2  -3   3  119.50    6.37
  -2   3  -3  110.32    5.88
   2  -3   4  664.48   15.54
   2   3   4  683.35   15.66
   2  -3   4  692.81   16.42
  -2   3  -4  668.32   16.08
   2  -3   5 2545.76   41.36
   2  -3   5 2673.50   42.92
  -2   3  -5 2678.79   42.87
   2   3   5 2631.69   41.47
   2  -3   6   10.68    3.27
   2   3   6   18.07    3.84
  -2  -3  -6   11.33    3.45
   2  -3   6   17.79    4.30
  -2   3  -6    7.96    3.51
  -2  -3  -7 1001.23   22.03
   2  -3   7  977.17   23.25
  -2   3  -7 1004.78   23.25
   2   3   7  977.77   21.82
  -2  -3  -8  669.42   17.81
   2  -3   8  687.46   19.53
  -2   3  -8  722.47   19.62
   2   3   8  667.22   18.02
  -2  -3  -9   86.53    6.55
   2   3   9   83.19    6.71
  -2   3  -9   95.74    7.50
   2  -3   9   82.73    7.46
  -2  -3 -10  257.33   11.33
   2  -3  10  259.78   12.56
   2   3  10  242.60   11.34
  -2   3 -10  259.29   12.34
  -2  -3 -11  420.32   15.23
   2  -3  11  400.62   16.19
  -2  -3 -12   -2.25    3.61
   2  -3  12   -0.19    3.97
   2  -3  13  664.53   22.80
   2   3  13  688.26   21.67
   2   3  14    5.32    4.70
   2  -3  14   -7.14    5.06
   2  -3  15  848.29   27.58
   2   3  15  783.19   25.09
   2   3  16   -1.24    4.74
   2  -3  16    3.23    5.07
   2   3  17    8.24    4.62
   2  -3  17   11.24    5.52
   2  -3  18  105.87   11.48
   2   3  18  124.59   11.25
   2  -3  19  391.90   20.81
   2   3  19  364.40   18.94
   2   3  20   34.12    7.52
   2   3  21  287.21   17.92
  -2  -4  21   73.14   10.02
  -2  -4  20   -6.92    4.97
  -2  -4  19    2.02    5.60
  -2   4  19    3.85    4.55
  -2  -4  18    3.78    4.87
  -2   4  18    7.06    4.31
  -2   4  17  179.92   10.38
  -2  -4  17  195.41   13.36
   2  -4 -16    8.47    4.11
  -2  -4  16   14.23    5.86
  -2   4  16   11.99    3.98
  -2  -4  15  748.68   24.77
  -2   4  15  738.74   19.83
   2  -4 -15  714.22   19.93
   2  -4 -14   17.99    3.57
  -2  -4  14    6.35    5.37
  -2   4  14   22.47    4.24
  -2  -4  13  979.50   27.25
   2  -4 -13  954.91   21.72
  -2   4  13  980.96   22.00
   2  -4 -12    1.12    2.49
  -2  -4  12    3.53    4.22
  -2   4  12    0.50    2.52
   2  -4 -11   13.04    2.69
  -2  -4  11   12.00    4.07
  -2   4  11    6.36    2.67
   2  -4 -10  122.29    5.77
   2   4 -10  126.32    8.60
  -2  -4  10  117.25    8.50
  -2   4  10  132.14    6.19
   2  -4  -9 2145.40   32.99
  -2  -4   9 2147.19   40.62
   2   4  -9 2221.82   41.06
   2  -4  -8  270.35    7.43
   2   4  -8  290.80   11.84
  -2  -4   8  272.98   11.68
  -2  -4   7  867.20   13.87
   2   4  -7  913.94   22.03
  -2  -4   7  907.07   21.77
   2   4  -6  213.72    9.70
  -2  -4   6  194.17    9.38
   2   4  -5  298.74   10.99
  -2  -4   5  308.54   11.30
   2   4  -4  508.02   14.45
  -2  -4   4  488.29   14.17
  -2   4   4  484.51    9.74
  -2   4   4  508.04   14.42
  -2   4   3  996.20   16.47
   2   4  -3  972.06   21.21
  -2   4   3 1003.98   21.26
  -2   4   2  368.04    8.61
   2   4  -2  372.85   11.48
  -2   4   2  364.48   11.34
   2   4  -2  324.99    7.05
   2   4  -1 2555.90   40.63
   2  -4  -1 2521.86   36.70
  -2   4   1 2550.00   36.88
   2  -4  -1 2538.11   39.86
  -2   4   1 2556.77   39.93
  -2   4   0  212.88    7.13
   2  -4   0  218.22    7.41
   2  -4   0  226.15    8.37
  -2   4   0  227.38    8.53
  -2   4  -1 3969.76   56.44
   2  -4   1 3919.22   55.50
  -2   4  -1 3905.19   55.50
   2  -4   1 3928.69   56.56
  -2   4  -2  291.90    9.79
   2  -4   2  284.21    9.42
   2  -4   2  272.85    9.30
  -2   4  -2  286.19    9.48
  -2   4  -3 1200.15   23.26
   2  -4   3 1178.88   22.67
   2  -4   3 1207.46   23.71
  -2   4  -3 1238.94   23.83
   2  -4   4  146.28    7.04
   2   4   4  152.60    7.38
   2  -4   4  156.30    8.00
  -2   4  -4  151.98    7.57
   2  -4   5  872.29   19.45
   2   4   5  906.68   19.81
   2  -4   5  935.11   21.59
  -2   4  -5  978.42   21.84
   2  -4   6   -0.35    2.57
   2   4   6    1.11    2.99
   2  -4   6    1.49    3.46
  -2   4  -6    4.82    2.97
   2  -4   7  183.96    8.63
   2  -4   7  199.15   10.05
  -2   4  -7  204.48    9.98
   2   4   7  197.51    9.08
   2  -4   8  147.43    8.39
   2  -4   8  147.36    9.19
   2   4   8  147.16    8.23
  -2   4  -8  153.86    9.10
  -2  -4  -9  804.23   20.86
   2  -4   9  766.68   20.44
   2  -4   9  788.23   22.53
  -2   4  -9  854.93   23.27
   2   4   9  789.38   20.79
  -2  -4 -10   42.71    5.36
   2   4  10   24.99    4.65
   2  -4  10   36.12    5.74
  -2  -4 -11 1095.02   26.75
   2  -4  11 1054.31   28.50
   2   4  11 1054.70   26.46
  -2  -4 -12   -0.13    3.30
   2  -4  12   -2.42    4.73
   2  -4  13   35.53    6.26
   2   4  14    0.17    4.12
   2  -4  14   -1.49    4.60
   2  -4  15  202.42   13.65
   2   4  15  219.87   13.17
   2  -4  16    0.65    5.16
   2   4  16    1.81    4.49
   2  -4  17  162.25   13.16
   2   4  17  169.89   12.22
   2  -4  18    9.73    5.21
   2   4  18   23.62    6.69
   2   4  19   38.90    8.04
   2   4  20    6.02    5.33
   2   4  21   60.66    8.91
  -2  -5  20  136.40   13.14
  -2  -5  19  292.95   17.91
  -2  -5  18   -0.92    5.10
  -2  -5  17  410.04   19.81
  -2   5  17  366.22   14.35
  -2  -5  16   60.66    8.14
  -2   5  16   58.46    6.08
   2  -5 -15   21.48    3.88
  -2  -5  15   26.23    6.22
  -2   5  15   20.67    4.25
   2  -5 -14    3.08    2.70
  -2  -5  14    3.01    4.51
  -2   5  14    2.88    2.92
   2  -5 -13  149.94    7.60
  -2  -5  13  158.75   11.25
  -2   5  13  162.02    8.11
   2  -5 -12  150.79    7.15
  -2  -5  12  146.62   10.53
  -2   5  12  143.35    7.23
  -2  -5  11  958.82   18.58
   2  -5 -11  950.74   19.58
  -2  -5  11  965.83   26.69
  -2   5  11  988.29   20.16
  -2  -5  10   78.70    4.14
  -2  -5  10   80.11    7.63
  -2  -5   9 1350.71   21.19
   2   5  -9 1396.78   31.41
  -2  -5   9 1351.03   31.04
  -2  -5   8    1.99    1.27
  -2  -5   8    2.28    3.66
   2   5  -8    4.39    3.33
  -2  -5   7   45.79    2.13
  -2  -5   7   55.22    6.06
   2   5  -7   50.20    5.61
   2   5  -6    3.86    3.23
  -2  -5   6    6.00    3.74
  -2   5   5 2640.21   45.71
   2   5  -5 2736.23   45.97
  -2  -5   5 2656.34   46.05
  -2   5   5 2718.87   38.61
  -2   5   5 2674.25   34.80
  -2   5   4   71.43    2.70
  -2   5   4   60.13    5.87
   2   5  -4   60.61    5.70
  -2   5   4   55.59    3.58
  -2   5   3 1928.23   34.96
   2   5  -3 1942.27   26.92
  -2   5   3 1969.25   30.14
   2   5  -3 1975.74   35.66
  -2   5   2   20.25    3.90
   2   5  -2   23.60    2.55
   2   5  -2   22.42    3.82
  -2   5   2   23.46    2.87
  -2   5   1  698.09   17.03
   2  -5  -1  705.05   15.07
  -2   5   1  693.92   15.03
   2   5  -1  725.93   18.05
  -2   5   0   -0.87    2.92
   2  -5   0    3.94    2.53
   2  -5   0    3.62    2.52
  -2   5   0    5.23    2.63
  -2   5  -1   71.29    5.85
   2  -5   1   68.28    5.26
   2  -5   1   58.13    4.85
  -2   5  -1   64.97    4.80
  -2   5  -2    0.72    3.00
   2  -5   2    3.15    2.45
   2  -5   2    4.10    3.00
  -2   5  -2   -2.46    2.74
  -2   5  -3 1310.53   25.77
   2  -5   3 1326.45   25.38
   2  -5   3 1320.81   26.56
  -2   5  -3 1371.96   26.77
   2   5   4    3.52    3.19
   2  -5   4    0.85    2.49
   2  -5   4    2.14    3.30
  -2   5  -4    4.99    3.06
   2   5   5 2418.38   40.69
   2  -5   5 2442.39   40.41
   2  -5   5 2471.65   43.39
  -2   5  -5 2504.09   43.32
   2   5   6   11.11    3.61
   2  -5   6    7.53    2.73
   2  -5   6    6.92    3.85
  -2   5  -6   13.52    3.38
   2  -5   7  150.75    7.84
   2  -5   7  169.40    9.77
   2   5   7  161.19    8.55
  -2   5  -7  164.58    9.49
   2  -5   8  108.12    7.12
   2  -5   8  115.48    8.50
  -2   5  -8  134.49    9.12
   2   5   8  107.64    7.26
   2  -5   9  184.00    9.34
   2  -5   9  196.32   11.34
   2   5   9  187.43    9.83
   2   5  10   -0.58    3.70
   2  -5  10   -1.38    2.89
   2  -5  10    3.37    4.30
   2  -5  11  492.06   17.03
   2  -5  11  518.33   19.83
   2   5  11  489.89   17.33
   2  -5  12  147.19    9.38
   2  -5  12  161.62   11.68
   2  -5  13  510.82   20.91
   2  -5  14    5.71    4.50
   2  -5  15  638.23   24.79
   2   5  15  605.14   21.85
   2  -5  16   37.72    7.74
   2   5  16   34.30    6.62
   2  -5  17   22.52    6.67
   2   5  17   13.40    5.31
   2  -5  18   75.42    9.91
   2   5  18   63.26    8.59
   2   5  19   79.45    9.86
   2   5  20   39.21    7.92
  -2  -6  18    9.13    6.55
  -2  -6  17  369.83   19.46
  -2  -6  16  261.42   15.92
  -2   6  16  223.09   10.77
  -2  -6  15  769.38   27.05
  -2   6  15  752.27   19.96
  -2  -6  14   27.84    6.34
  -2   6  14   21.28    4.10
  -2  -6  13  131.83    6.25
  -2  -6  13  126.51   10.75
  -2   6  13  131.58    7.54
  -2  -6  12  524.99   12.29
  -2  -6  12  478.35   19.58
  -2  -6  11   19.99    2.37
  -2  -6  11   25.68    5.97
  -2  -6  10  568.21   11.29
  -2  -6  10  563.12   20.06
  -2  -6   9  131.85    4.31
  -2  -6   9  151.31    9.89
  -2  -6   8    4.79    4.00
  -2  -6   7 1423.99   32.70
   2   6  -7 1530.28   33.27
  -2  -6   6  204.19   10.92
   2   6  -6  214.61   11.04
  -2   6   6  210.22    7.45
  -2   6   6  201.31    5.17
  -2   6   5  744.12   20.66
  -2   6   5  751.58   15.88
   2   6  -5  798.91   21.37
  -2   6   5  761.38   12.44
   2   6  -4  198.14    5.33
   2   6  -4  211.62   10.46
  -2   6   4  197.45    7.40
  -2   6   4  203.28   10.22
  -2   6   3   73.25    4.73
   2   6  -3   78.84    6.41
   2   6  -3   81.12    3.74
  -2   6   3   82.55    6.45
  -2   6   2  337.29   10.27
   2   6  -2  332.65   12.66
   2   6  -2  353.87    9.00
  -2   6   2  349.04   12.53
   2   6  -1  957.76   22.63
  -2   6   1  941.07   19.59
  -2   6   1  943.17   21.61
   2   6  -1  887.91   17.64
   2   6   0   50.71    5.43
   2  -6   0   50.17    4.52
  -2   6   0   54.50    4.84
  -2   6   0   43.35    4.45
  -2   6  -1  491.96   14.53
   2  -6   1  490.54   14.20
  -2   6  -1  468.24   13.83
   2  -6   1  473.09   14.16
  -2   6  -2  455.43   13.63
  -2   6  -2  458.38   14.08
   2  -6   2  435.86   13.88
   2  -6   2  446.57   13.57
  -2   6  -3 2204.43   38.75
   2  -6   3 2261.07   40.32
  -2   6  -3 2338.88   40.59
   2  -6   3 2278.15   38.68
  -2   6  -4  708.31   18.25
   2   6   4  701.98   18.26
   2  -6   4  725.29   18.02
  -2   6  -4  765.03   20.00
   2  -6   4  725.13   19.73
   2   6   5  259.86   10.45
   2  -6   5  252.52   10.08
   2  -6   5  237.53   11.33
  -2   6  -5  267.28   11.72
   2   6   6    1.60    3.10
   2  -6   6    5.47    2.44
   2  -6   6    4.85    3.49
  -2   6  -6    9.12    3.67
   2  -6   7  364.35   12.71
   2  -6   7  367.45   15.12
   2   6   7  374.47   13.12
   2   6   8   -0.03    3.22
   2  -6   8    1.35    2.88
   2  -6   8   -0.98    4.27
   2  -6   9  693.99   19.44
   2  -6   9  739.21   23.31
   2   6   9  736.85   20.22
   2   6  10    1.60    3.40
   2  -6  10    2.72    3.38
   2  -6  10    2.35    4.08
   2  -6  11  595.30   18.72
   2  -6  11  637.01   22.82
   2   6  11  599.45   19.37
   2   6  12   34.56    5.81
   2  -6  12   32.92    5.05
   2  -6  12   35.54    6.81
   2  -6  13   52.86    7.97
   2  -6  14   12.07    5.91
   2  -6  15  207.78   14.92
   2  -6  16    9.44    5.12
   2   6  16   -3.04    4.30
   2  -6  17  636.08   26.72
   2   6  17  596.16   23.43
   2   6  18   -1.46    5.12
   2   6  19  126.62   12.02
  -2  -7  17   38.68    6.71
  -2  -7  16  172.38   13.79
  -2  -7  15    9.37    5.42
  -2  -7  14  372.92   18.52
  -2   7  14  363.33   12.85
  -2  -7  13  274.28   15.63
  -2  -7  12   11.35    5.61
  -2  -7  11  403.02    8.77
  -2  -7  11  430.67   18.77
  -2  -7  10  430.20   18.27
  -2  -7   9    8.68    4.90
  -2   7   8  132.29    6.59
  -2  -7   8  139.23   10.14
  -2   7   7   65.59    7.09
  -2  -7   7   69.97    7.35
  -2   7   7   73.94    4.97
  -2   7   7   69.88    3.39
  -2   7   6  293.01   13.61
  -2   7   6  298.62    9.94
  -2   7   6  305.27    7.04
  -2   7   5   20.15    2.18
  -2   7   5   20.94    3.32
  -2   7   5   10.16    4.21
   2   7  -4  343.05    8.30
  -2   7   4  326.26   13.55
  -2   7   4  331.65   10.82
   2   7  -4  349.56   14.41
   2   7  -3  198.91    6.61
  -2   7   3  189.75    9.87
   2   7  -3  203.47   10.60
  -2   7   3  183.68    7.94
  -2   7   2    4.75    3.59
   2   7  -2    6.21    2.25
  -2   7   2    1.87    2.14
   2   7  -2    9.00    3.26
  -2   7   1  822.12   21.05
   2   7  -1  800.60   17.41
  -2   7   1  798.72   19.36
   2   7  -1  863.69   22.37
  -2   7   0   27.05    3.90
   2   7   0   27.54    3.65
   2   7   0   36.59    5.21
  -2   7   0   33.72    4.42
  -2   7  -1   23.36    4.12
   2   7   1   20.69    4.03
   2  -7   1   19.87    3.91
  -2   7  -1   17.51    3.77
  -2   7  -2  449.96   14.29
   2  -7   2  437.90   14.79
  -2   7  -2  470.08   15.14
   2  -7   2  444.79   14.24
  -2   7  -3  313.38   11.90
  -2   7  -3  299.54   12.39
   2  -7   3  280.43   12.04
   2  -7   3  316.79   11.57
  -2   7  -4  323.42   12.48
   2  -7   4  329.75   12.09
  -2   7  -4  362.22   14.03
   2  -7   4  322.39   13.49
   2   7   5   40.85    5.00
   2  -7   5   48.63    5.02
   2  -7   5   44.17    5.91
  -2   7  -5   46.27    5.75
   2   7   6   -2.46    3.24
   2  -7   6    0.67    3.88
   2  -7   6    0.73    2.91
   2   7   7   75.92    6.49
   2  -7   7   79.30    6.21
   2  -7   7   67.32    7.10
   2  -7   8  288.02   11.75
   2  -7   8  294.35   14.67
   2   7   8  270.60   11.80
   2  -7   9  262.60   11.39
   2  -7   9  245.03   13.79
   2   7   9  275.05   12.13
   2  -7  10  424.34   15.25
   2  -7  10  437.45   18.94
   2   7  10  423.18   15.67
   2  -7  11  206.55   10.84
   2  -7  11  223.82   13.87
   2   7  11  218.53   11.49
   2  -7  12  414.67   19.36
   2   7  12  403.85   16.21
   2  -7  13 1008.95   32.09
   2  -7  14   58.44    8.50
   2  -7  15  189.72   14.33
   2  -7  16  285.16   18.01
   2   7  17    9.01    5.50
   2   7  18  134.18   12.00
  -2  -8  16   -6.37    5.54
  -2  -8  15   77.78   10.13
  -2  -8  14  249.41   16.01
  -2  -8  13   32.55    7.05
  -2  -8  12   53.00    7.91
  -2  -8  11   57.85    8.15
  -2   8  10  250.92   10.04
  -2  -8  10  273.67   15.58
  -2  -8   9   73.85    8.42
  -2   8   9   66.98    5.20
  -2   8   8  223.92   13.26
  -2   8   8  226.96    9.38
  -2  -8   8  214.66   13.11
  -2   8   7  691.81   23.00
  -2   8   7  693.97   17.54
  -2   8   7  726.38   13.10
  -2   8   6   41.04    2.53
  -2   8   6   46.12    4.68
  -2   8   6   44.01    6.90
  -2   8   5   64.77    3.49
  -2   8   5   63.91    5.21
  -2   8   5   61.04    7.06
   2   8  -4  371.70    9.72
  -2   8   4  374.71   15.22
  -2   8   4  378.22   12.57
  -2   8   3   -2.78    3.79
   2   8  -3    0.85    2.10
  -2   8   3   -0.76    2.44
  -2   8   2  231.38   11.29
   2   8  -2  238.18    8.65
  -2   8   2  231.10   10.09
   2   8  -1  326.76   10.94
  -2   8   1  320.55   12.84
  -2   8   1  342.31   12.61
  -2   8   0   44.19    5.19
   2   8   0   42.85    4.39
  -2   8   0   48.75    5.32
  -2   8  -1  695.27   19.53
   2   8   1  692.08   18.29
  -2   8  -1  724.55   20.05
  -2   8  -2    6.34    2.76
   2  -8   2    8.75    3.84
  -2   8  -2   10.44    3.58
  -2   8  -3   14.87    4.37
   2  -8   3    9.23    4.28
  -2   8  -3    6.29    3.01
  -2   8  -4  591.18   17.99
   2  -8   4  589.65   19.54
   2  -8   4  591.33   17.46
   2   8   5  148.81    8.74
   2  -8   5  154.37   10.26
   2  -8   5  156.44    8.70
   2   8   6 1470.10   31.03
   2  -8   6 1470.61   34.95
   2  -8   6 1460.77   30.74
   2   8   7   25.88    5.09
   2  -8   7   19.52    3.66
   2  -8   7   21.01    5.64
   2  -8   8  325.09   13.00
   2  -8   8  334.54   16.31
   2   8   8  328.32   13.23
   2   8   9   91.33    7.44
   2  -8   9   96.86    9.86
   2  -8   9   86.32    6.90
   2   8  10   92.61    7.75
   2  -8  10  101.73   10.09
   2  -8  10  110.60    8.11
   2   8  11   38.45    5.75
   2  -8  11   42.01    7.31
   2  -8  12  371.38   19.18
   2   8  12  320.57   14.84
   2   8  13    7.38    4.75
   2  -8  13   10.57    5.52
   2  -8  14  339.60   19.41
   2  -8  15    9.91    5.98
  -2  -9  14  514.76   24.29
  -2  -9  13   -0.01    4.89
  -2  -9  12  374.49   19.64
  -2   9  11    7.27    6.10
  -2  -9  11    4.76    5.95
  -2   9  10   35.40    7.26
  -2  -9  10   23.78    6.51
  -2   9   9  170.03   12.52
  -2   9   8 1643.81   40.57
  -2   9   8 1651.74   32.09
  -2   9   7   78.06    8.50
  -2   9   7   82.93    6.39
  -2   9   7   90.66    4.16
  -2   9   6 1679.26   39.67
  -2   9   6 1739.72   33.70
  -2   9   6 1773.51   27.01
  -2   9   5  107.09    4.89
  -2   9   5  117.17    7.42
  -2   9   5   96.33    8.55
   2   9  -4  160.25    6.65
  -2   9   4  150.22    8.42
  -2   9   4  143.67    9.77
   2   9  -3  112.10    5.99
  -2   9   3  110.07    7.37
  -2   9   3  107.23    8.55
  -2   9   2  138.71    8.38
   2   9  -2  154.51    7.47
  -2   9   2  160.29   10.16
  -2   9   1   46.93    5.34
  -2   9   1   35.13    4.93
   2   9  -1   35.68    4.37
  -2   9   0 1919.77   38.52
   2   9   0 1898.94   35.63
  -2   9   0 1940.69   38.77
  -2   9  -1   -5.48    4.58
   2   9   1    0.19    2.96
  -2   9  -2 1132.70   27.13
   2   9   2 1111.63   26.27
   2  -9   3   10.79    4.30
  -2   9  -3   17.80    4.06
   2  -9   4   49.78    6.75
  -2   9  -4   41.95    5.57
   2   9   5   60.21    6.40
   2  -9   5   47.45    6.75
   2   9   6   92.19    7.35
   2  -9   6   98.10    9.15
   2  -9   6   82.08    6.78
   2   9   7    7.97    3.76
   2  -9   7    7.65    3.36
   2  -9   7    6.75    5.41
   2  -9   8  485.48   20.59
   2   9   8  499.23   16.97
   2   9   9    5.35    3.76
   2  -9   9   -0.73    4.56
   2  -9  10  285.75   16.62
   2   9  10  321.47   14.03
   2   9  11   -4.12    4.18
   2  -9  11    2.61    5.62
   2   9  12   61.82    6.93
   2  -9  12   70.80    8.91
   2  -9  13   10.45    6.21
  -2  10  13    4.81    5.56
  -2 -10  12  434.72   22.05
  -2  10  12  445.79   22.29
  -2  10  11   85.09   10.03
  -2  10  10  641.39   25.80
  -2  10   9  -10.34    6.10
  -2  10   8  135.79   11.27
  -2  10   7  442.73   19.59
  -2  10   6   17.82    4.96
  -2  10   5  124.30    5.48
  -2  10   5  114.45    7.90
  -2  10   5  106.02    9.24
   2  10  -4  671.49   15.67
  -2  10   4  675.42   20.06
  -2  10   4  657.72   22.54
  -2  10   3    7.92    2.77
   2  10  -3   17.88    3.53
  -2  10   3   15.64    4.64
  -2  10   2  897.45   25.84
   2  10  -2  920.79   20.93
  -2  10   1  229.01   12.12
   2  10  -1  248.10   10.68
  -2  10   0   50.55    6.26
   2  10   0   55.11    5.62
  -2  10  -1  110.40    7.98
   2  10   1  108.54    8.10
  -2  10  -2  193.80   10.66
   2  10   2  201.48   10.79
   2  10   3   31.39    5.41
  -2  10  -3   16.79    4.18
  -2  10  -4  601.98   19.85
   2  10   4  600.06   20.55
   2  10   5    5.53    3.97
   2 -10   5   -2.97    4.33
   2  10   6  345.85   14.47
   2 -10   6  355.56   17.60
   2  10   7   25.22    4.98
   2 -10   7   22.95    5.57
   2 -10   8  135.56   11.29
   2  10   8  141.13    9.46
   2  10   9   28.21    5.17
   2 -10   9   21.71    6.54
   2  10  10    7.55    4.35
   2 -10  10    4.31    5.70
   2 -10  11   61.74    9.47
   2 -10  12  335.94   19.52
  -2  11  11   26.02    7.29
  -2  11  10   -0.88    5.17
  -2  11   9    1.94    5.54
  -2  11   8   49.54    7.30
  -2  11   7    0.18    4.65
  -2  11   6  276.57   15.62
  -2  11   5  115.44    9.98
  -2  11   4    7.28    4.63
  -2  11   3  333.20   15.95
   2  11  -2   92.07    6.85
  -2  11   2   73.35    7.65
  -2  11   1   19.21    3.99
   2  11  -1   19.79    4.04
  -2  11   0    6.77    3.70
   2  11   0    8.62    3.42
  -2  11  -1  111.20    8.89
   2  11   1  115.63    8.48
  -2  11  -2  498.06   18.70
   2  11   2  501.13   18.21
   2  11   3    4.95    4.48
  -2  11  -3   -3.15    4.88
  -2  11  -4  652.12   21.57
   2  11   4  667.40   21.38
   2  11   4  679.79   23.03
   2  11   5   10.53    4.50
   2  11   5    4.21    4.31
   2  11   6    3.53    4.15
   2 -11   6   -0.24    4.68
   2  11   6   -0.69    4.48
   2  11   7  117.81    8.76
   2 -11   7  131.93   11.78
   2 -11   8  596.12   25.12
   2 -11   9    5.95    5.16
   2 -11  10  342.22   19.75
  -2  12   9  133.45   12.35
  -2  12   8   41.10    7.18
  -2  12   7   63.28    8.67
  -2  12   6   57.45    8.19
  -2  12   5   24.88    5.92
  -2  12   4  220.29   13.89
  -2  12   3   69.07    7.59
  -2  12   2  125.87   10.14
  -2  12   1   32.78    5.33
  -2  12   0   73.61    7.64
  -2  12  -1  162.35   10.67
  -2  12  -2   10.69    3.92
   2  12   2   21.19    5.02
  -2  12  -3   57.15    6.78
   2  12   3   62.23    7.46
   2  12   4  183.01   12.62
   2  12   5   16.93    4.44
   2  12   6  125.98   11.36
   2  12   7   35.91    6.48
   2  12   8   70.62    9.45
  -2  13   7   -5.08    5.43
  -2  13   6    9.37    5.18
  -2  13   5  334.84   18.43
  -2  13   4   79.33    8.98
  -2  13   3  380.07   18.72
  -2  13   2   57.19    7.50
  -2  13   1  255.41   14.69
  -3   0  22    7.39    5.20
  -3   0  21    5.32    5.27
  -3   0  20    3.94    4.52
  -3   0  19   -6.56    4.18
  -3   0  18   14.22    4.62
  -3   0  17   -1.39    3.79
  -3   0  16 1296.92   30.60
  -3   0  15    6.07    3.88
  -3   0  14  836.87   21.77
  -3   0  13    0.99    3.32
   3   0 -13    1.49    2.74
  -3   0  12   18.02    3.75
   3   0 -12   13.78    3.00
  -3   0  11   -3.37    2.84
   3   0 -11   -3.53    2.57
  -3   0  10 1219.53   23.63
   3   0 -10 1211.34   23.68
  -3   0   9    1.52    2.50
   3   0  -9    0.85    2.21
  -3   0   8  976.87   18.66
   3   0  -8  964.47   18.69
  -3   0   7   -4.11    2.47
   3   0  -7    0.88    2.00
   3   0  -6 1996.49   29.86
  -3   0   6 2020.22   29.81
  -3   0   5    1.38    2.22
   3   0  -5    2.19    1.90
  -3   0   5    2.77    2.81
   3   0  -4  368.96    8.24
  -3   0   4  393.30    9.49
   3   0  -3    0.03    2.25
  -3   0   3   -2.50    2.87
   3   0  -2 9748.36  122.67
  -3   0   2 9809.54  122.70
   3   0  -1   -4.41    2.54
  -3   0   1   -0.91    3.00
   3   0   0  576.75   12.77
   3   0   0  611.91   12.62
   3   0   1    0.96    3.23
  -3   0  -1    0.67    2.67
  -3   0  -2  945.73   18.22
   3   0   2  957.54   18.35
  -3   0  -3    1.65    2.83
   3   0   3    1.09    3.85
   3   0   4   41.21    4.97
  -3   0  -4   41.41    4.34
   3   0   5    3.39    3.92
  -3   0  -5   -2.30    2.96
   3   0   6 2086.62   36.41
  -3   0  -6 2072.75   36.09
  -3   0  -7    5.55    3.08
  -3   0  -8 2169.08   39.10
   3   0   8 2122.76   39.35
  -3   0  -9   -1.59    3.03
   3   0   9   -0.42    3.98
  -3   0 -10   27.60    4.74
   3   0  10   22.18    4.73
   3   0  11   -3.09    3.86
   3   0  12  127.25    9.64
   3   0  13   -4.68    4.07
   3   0  14   49.06    7.52
   3   0  15    2.71    4.49
   3   0  16  401.20   18.99
   3   0  17    1.06    4.81
   3   0  18  225.37   15.32
   3   0  19   -3.46    5.04
   3   0  20  282.02   18.12
  -3  -1  23   96.51   10.58
  -3  -1  22  257.62   16.14
  -3   1  21    2.46    4.35
  -3  -1  21   -3.81    4.82
  -3  -1  20  300.38   16.02
  -3   1  20  303.60   15.61
  -3   1  19   74.42    7.79
  -3  -1  19   69.15    8.22
  -3  -1  18   94.34    9.12
  -3   1  18   68.74    7.32
  -3  -1  17    5.22    4.46
  -3   1  17    5.95    3.77
  -3  -1  16  145.06    9.87
  -3   1  16  170.61    9.77
  -3   1  15   -0.39    3.26
  -3  -1  15    1.43    3.78
  -3   1  14  594.76   17.26
  -3  -1  14  603.63   18.70
   3   1 -14  602.33   18.71
  -3   1  13  432.16   13.73
  -3  -1  13  416.00   14.74
   3   1 -13  421.24   14.82
  -3   1  12 1833.47   32.71
  -3  -1  12 1819.13   34.82
   3   1 -12 1833.98   34.95
  -3   1  11    2.18    2.35
  -3  -1  11    2.79    2.87
   3   1 -11    4.65    2.83
  -3  -1  10  296.88   10.77
  -3   1  10  301.51    9.50
   3   1 -10  275.37   10.49
   3   1  -9 1775.07   31.44
  -3  -1   9 1803.52   31.42
  -3   1   9 1747.97   28.48
   3  -1  -9 1791.57   28.69
  -3   1   8    0.42    1.97
  -3  -1   8    3.18    2.64
   3  -1  -8    5.40    2.02
   3   1  -8    6.29    2.66
  -3   1   7  281.99    7.28
   3   1  -7  298.11    9.26
  -3  -1   7  300.60    9.41
   3  -1  -7  295.17    7.49
   3   1  -6 1911.94   30.03
  -3  -1   6 1881.17   29.94
  -3   1   6 1877.12   26.44
   3  -1  -6 1865.64   26.67
  -3   1   5 1150.80   16.70
   3   1  -5 1170.93   20.21
   3  -1  -5 1120.03   16.72
  -3  -1   5 1186.83   20.38
  -3   1   5 1131.27   21.21
  -3  -1   5 1155.67   18.62
   3   1  -4 2026.40   30.93
   3  -1  -4 2035.77   26.81
  -3   1   4 2115.19   32.20
  -3  -1   4 2064.42   28.99
   3  -1  -3  422.48   10.53
   3   1  -3  408.60    8.49
  -3   1   3  409.49   10.70
  -3  -1   3  423.31    8.59
  -3   1   2  648.38   13.63
   3  -1  -2  646.06   13.53
   3   1  -2  635.54   11.54
  -3  -1   2  653.09   11.76
   3   1  -1   16.10    2.60
   3  -1  -1   18.00    3.13
  -3   1   1   13.17    3.53
   3  -1  -1   12.97    2.59
   3  -1   0   67.65    4.49
  -3   1   0   72.26    5.20
  -3   1   0   70.59    4.20
   3  -1   0   73.81    4.31
   3  -1   1   38.76    4.01
   3  -1   1   39.82    3.94
  -3   1  -1   45.67    3.59
   3   1   1   37.41    4.78
   3   1   2  217.24    8.63
   3  -1   2  210.25    7.92
  -3   1  -2  225.39    7.55
   3  -1   2  240.69    8.09
  -3  -1  -3   39.59    4.41
   3  -1   3   44.14    4.64
   3   1   3   44.82    5.01
  -3   1  -3   38.12    3.89
  -3  -1  -4 2873.48   44.61
   3  -1   4 2923.84   44.35
  -3   1  -4 2887.96   44.19
   3  -1   4 2873.14   44.46
   3   1   4 2880.21   44.50
  -3  -1  -5  648.18   16.25
   3   1   5  654.48   16.31
   3  -1   5  651.79   16.52
  -3   1  -5  664.41   16.36
  -3  -1  -6 2134.86   36.75
   3  -1   6 2093.49   37.06
   3   1   6 2124.38   36.97
  -3   1  -6 2111.30   36.78
  -3  -1  -7  610.03   16.94
  -3   1  -7  632.00   17.21
   3  -1   7  622.13   17.58
   3   1   7  609.94   17.11
  -3   1  -8   38.31    4.81
  -3  -1  -8   42.14    5.27
   3   1   8   33.81    5.04
   3  -1   8   34.14    5.07
   3  -1   9  297.26   12.89
  -3  -1  -9  317.98   12.70
  -3   1  -9  321.07   12.90
   3  -1  10  508.26   17.62
  -3   1 -10  522.17   17.51
  -3  -1 -10  534.02   17.40
   3   1  10  509.03   17.33
   3  -1  11    6.86    3.79
   3   1  11   11.56    4.77
   3  -1  12  708.17   22.71
   3   1  12  728.12   22.47
   3   1  13  408.18   17.33
   3  -1  13  405.33   17.44
   3  -1  14  101.77    9.65
   3   1  14   91.92    8.80
   3   1  15   67.42    8.11
   3  -1  15   79.24    8.83
   3  -1  16   33.21    7.24
   3   1  16   25.22    6.81
   3  -1  17   84.73    9.50
   3   1  17   91.97   10.26
   3  -1  18  264.01   16.71
   3   1  18  248.95   15.96
   3  -1  19   -5.76    5.21
   3   1  19   10.63    5.83
   3   1  20  384.07   21.02
  -3  -2  23  135.18   12.95
  -3  -2  22   35.66    7.54
  -3  -2  21  158.79   13.12
  -3  -2  20   78.38    9.37
  -3   2  20   91.64    8.29
  -3  -2  19  100.50    9.92
  -3   2  19   95.08    8.35
  -3   2  18  509.97   18.11
  -3  -2  18  498.86   20.35
  -3  -2  17   30.15    5.94
  -3   2  17   43.93    5.55
  -3   2  16  272.14   11.90
  -3  -2  16  249.36   13.35
  -3  -2  15  282.25   13.59
  -3   2  15  260.27   11.16
   3  -2 -15  238.17   11.52
   3  -2 -14   11.53    3.38
  -3  -2  14    0.47    3.58
  -3   2  14    3.45    3.02
  -3  -2  13  994.23   25.13
  -3   2  13  966.45   21.52
   3  -2 -13  946.80   22.82
   3   2 -13 1059.77   25.97
  -3  -2  12    9.72    3.65
   3   2 -12    7.40    3.16
  -3   2  12   12.86    3.17
  -3  -2  11  259.99   11.22
  -3   2  11  249.02    8.71
   3   2 -11  253.41   11.09
  -3  -2  10  188.58    9.16
   3   2 -10  202.95    9.54
  -3   2  10  185.20    6.89
  -3  -2   9  160.48    8.25
   3   2  -9  166.74    8.26
  -3   2   9  162.95    5.90
  -3   2   8  117.86    4.48
   3   2  -8  117.96    6.74
  -3  -2   8  110.90    6.59
   3   2  -7  482.67   13.31
  -3   2   7  483.28    8.99
  -3  -2   7  479.51   13.21
  -3   2   6  201.85    4.44
   3   2  -6  230.92    8.48
  -3  -2   6  222.34    8.47
  -3  -2   6  213.96    5.65
   3   2  -5 1217.96   22.83
  -3  -2   5 1246.97   22.90
  -3  -2   5 1241.93   17.85
  -3   2   5 1208.25   23.45
   3   2  -4   -0.64    2.45
  -3   2   4   -3.56    3.80
  -3  -2   4   -0.38    1.42
   3  -2  -3 2748.79   35.90
   3   2  -3 2832.36   36.17
   3  -2  -3 2780.31   42.08
  -3   2   3 2858.60   42.38
   3   2  -3 2816.31   41.59
   3  -2  -2  750.37   15.73
  -3   2   2  740.69   15.94
   3   2  -2  709.20   11.83
   3  -2  -2  746.43   11.43
   3  -2  -2  709.49   11.09
  -3   2   1   35.54    4.83
   3  -2  -1   26.55    3.65
   3  -2  -1   27.06    2.55
  -3   2   1   25.24    2.48
   3  -2  -1   25.81    2.49
  -3   2   0   34.88    4.69
   3  -2   0   36.55    3.99
   3  -2   0   34.21    3.25
  -3   2   0   40.49    3.18
   3  -2   0   33.40    3.09
   3  -2   1   30.60    3.78
  -3   2  -1   28.26    4.73
   3  -2   1   34.78    3.68
  -3   2  -1   29.66    3.17
   3  -2   1   25.67    3.35
   3   2   2 2426.76   38.23
   3  -2   2 2297.27   37.47
  -3   2  -2 2419.21   36.03
   3  -2   2 2420.30   36.53
   3   2   3  300.81   10.27
   3  -2   3  308.88   10.41
   3  -2   3  313.07   10.12
  -3   2  -3  330.85    9.85
   3  -2   4    5.58    3.36
  -3   2  -4   -0.28    2.79
  -3  -2  -4    2.64    3.01
   3   2   4    1.95    3.58
   3  -2   4    0.46    3.33
  -3  -2  -5  334.15   11.45
  -3   2  -5  332.09   11.30
   3  -2   5  324.85   11.54
   3   2   5  327.15   11.28
  -3  -2  -6 1013.67   22.39
  -3   2  -6 1015.90   22.53
   3   2   6  997.19   22.40
   3  -2   6  995.63   22.82
  -3  -2  -7  352.57   12.54
  -3   2  -7  359.09   12.87
   3  -2   7  354.64   13.03
   3   2   7  326.34   12.42
  -3  -2  -8 1124.04   25.61
  -3   2  -8 1163.10   26.41
   3  -2   8 1126.92   26.40
   3   2   8 1124.70   25.71
  -3  -2  -9  267.46   11.63
  -3   2  -9  292.08   12.54
   3   2   9  257.26   11.77
   3  -2   9  253.90   11.99
  -3  -2 -10  927.61   23.94
   3   2  10  889.83   23.77
   3  -2  10  887.10   24.41
   3  -2  11 1023.28   27.39
   3  -2  12   -1.35    4.31
   3   2  12   -3.71    4.73
   3   2  13  122.31    9.94
   3  -2  13  124.38   10.20
   3  -2  14  306.80   15.87
   3   2  14  308.14   15.44
   3  -2  15   22.80    5.97
   3   2  15   11.56    5.31
   3  -2  16  702.53   26.18
   3   2  16  666.77   24.59
   3  -2  17   -5.87    5.06
   3   2  17    2.60    4.76
   3  -2  18  108.48   11.61
   3   2  18   98.04   10.78
   3   2  19   46.24    9.06
   3  -2  19   65.20    9.54
   3   2  20    4.49    5.32
  -3  -3  22   25.86    8.55
  -3  -3  21    4.23    4.91
  -3  -3  20   32.72    7.67
  -3   3  19  148.38    9.78
  -3  -3  19  157.59   13.51
  -3  -3  18  158.47   12.01
  -3   3  18  167.84    9.95
  -3  -3  17  462.93   19.51
  -3   3  17  440.41   15.69
   3  -3 -16   -4.73    3.22
  -3  -3  16    6.13    4.75
  -3   3  16    3.60    2.96
  -3  -3  15  191.16   11.87
  -3   3  15  168.31    8.58
   3  -3 -15  172.32    9.35
  -3  -3  14  263.31   13.36
  -3   3  14  265.74   10.37
   3  -3 -14  258.41   11.09
   3  -3 -13   35.50    4.67
  -3  -3  13   23.23    5.02
  -3   3  13   34.23    4.11
  -3  -3  12  180.07   10.20
  -3   3  12  164.46    7.22
   3   3 -12  178.62   10.28
   3  -3 -12  177.75    8.11
  -3  -3  11  265.52   11.90
  -3   3  11  253.76    8.35
   3   3 -11  269.51   12.02
   3  -3 -11  258.36    9.28
   3  -3 -10   17.34    3.02
  -3  -3  10   11.57    3.64
  -3   3  10   16.99    2.52
   3   3 -10   18.65    4.13
  -3   3   9  272.30    7.28
   3   3  -9  280.60   11.42
  -3  -3   9  270.15   11.35
   3  -3  -9  251.23    8.07
  -3  -3   8   43.55    4.96
   3   3  -8   54.26    5.24
  -3   3   8   47.74    2.72
   3  -3  -8   42.42    3.10
  -3   3   7  130.28    3.62
   3   3  -7  127.38    7.44
  -3  -3   7  129.72    7.40
   3  -3  -7  116.89    4.20
  -3   3   6  599.67   16.30
   3   3  -6  600.37   15.73
  -3  -3   6  629.00   16.15
   3  -3  -6  581.09    9.55
  -3   3   5   24.35    4.52
   3   3  -5   24.71    3.85
  -3   3   4 1561.06   28.83
   3   3  -4 1564.54   28.14
  -3   3   3   15.32    4.32
   3   3  -3    4.13    2.88
  -3   3   3    3.10    0.92
  -3   3   2   15.59    1.65
  -3   3   2   12.85    3.90
   3  -3  -2   17.68    3.66
   3  -3  -2   12.91    1.82
  -3   3   2   -1.40    2.10
  -3   3   1  354.58   11.13
   3  -3  -1  360.60   11.06
   3  -3  -1  367.31    8.40
  -3   3   1  359.61    8.25
  -3   3   1  368.31    7.57
  -3   3   0  590.89   14.81
   3  -3   0  619.03   14.92
   3  -3   0  595.05   12.43
  -3   3   0  608.28   12.50
  -3   3   0  621.56   11.92
  -3   3  -1 2745.22   42.41
   3  -3   1 2673.52   41.97
   3  -3   1 2696.38   39.90
  -3   3  -1 2711.02   39.89
  -3   3  -1 2721.62   39.14
  -3   3  -2  347.09   11.36
   3  -3   2  349.71   10.99
   3  -3   2  363.32   10.54
  -3   3  -2  346.58    9.84
  -3   3  -2  353.20   10.34
   3  -3   3  351.73   11.19
   3   3   3  352.55   11.57
   3  -3   3  364.07   11.21
  -3   3  -3  367.72   11.13
  -3   3  -3  366.79   10.80
   3  -3   4   -1.55    3.05
  -3   3  -4    7.96    3.23
   3   3   4   -3.17    3.55
   3  -3   4   -2.58    3.13
  -3   3  -4   -1.91    2.97
   3   3   5  252.26   10.31
   3  -3   5  257.22   10.36
   3  -3   5  257.72   10.45
  -3   3  -5  290.14   10.68
  -3   3  -5  274.95   10.70
   3  -3   6   21.09    3.94
  -3  -3  -6   26.26    4.23
   3   3   6   25.93    4.31
  -3   3  -6   24.55    3.94
  -3   3  -6   29.55    4.44
   3  -3   6   34.30    5.01
  -3  -3  -7 1613.93   32.03
   3  -3   7 1579.20   32.61
  -3   3  -7 1659.00   32.38
   3   3   7 1555.67   31.30
  -3  -3  -8   89.58    6.99
   3  -3   8   94.62    7.67
   3   3   8   99.08    7.34
  -3   3  -8  105.41    7.66
  -3  -3  -9 1751.47   35.02
   3  -3   9 1658.56   35.84
  -3   3  -9 1749.12   35.89
   3   3   9 1670.77   34.50
   3   3  10   51.53    6.32
  -3  -3 -10   66.53    6.46
   3  -3  10   58.73    6.86
   3  -3  11  290.12   14.21
   3   3  11  295.17   13.70
   3  -3  12    1.73    4.49
   3  -3  13  294.24   15.40
   3  -3  14   60.14    8.00
   3   3  14   59.52    7.63
   3  -3  15  612.16   23.77
   3   3  15  577.35   22.13
   3  -3  16    0.52    4.99
   3   3  16    8.67    5.56
   3  -3  17  225.20   15.40
   3   3  17  229.99   14.94
   3  -3  18   16.10    5.72
   3   3  18   12.33    5.63
   3   3  19   73.47    9.66
   3   3  20  100.19   11.29
  -3  -4  21  505.87   23.47
  -3  -4  20    0.70    5.12
  -3  -4  19  147.87   12.43
  -3  -4  18   94.54   10.33
  -3   4  18   75.74    6.92
  -3  -4  17   -0.21    4.69
  -3   4  17    7.23    3.90
  -3  -4  16   40.45    6.85
  -3   4  16   35.18    4.59
  -3  -4  15  140.21   10.74
  -3   4  15  149.57    7.90
   3  -4 -15  164.00    8.79
  -3  -4  14  157.52   11.00
  -3   4  14  150.13    7.58
   3  -4 -14  159.69    8.00
  -3   4  13  445.56   12.57
  -3  -4  13  433.32   17.34
   3  -4 -13  452.95   13.14
   3  -4 -12    0.58    2.31
  -3  -4  12    0.71    3.51
  -3   4  12    0.01    2.14
  -3  -4  11 1492.49   33.21
   3  -4 -11 1521.35   25.82
  -3   4  11 1481.34   25.10
   3   4 -10  233.26   11.45
  -3  -4  10  227.39   11.34
   3  -4 -10  224.73    7.10
  -3   4  10  212.56    6.81
   3  -4  -9  140.34    4.96
  -3  -4   9  145.14    8.83
   3   4  -9  156.93    9.09
  -3   4   9  146.39    5.02
   3  -4  -8  122.19    3.98
  -3  -4   8  110.05    7.77
   3   4  -8  121.48    7.87
  -3   4   8  122.21    4.15
   3   4  -7 2449.03   42.74
  -3  -4   7 2359.25   42.25
  -3   4   6  935.51   22.48
   3   4  -6  976.98   22.35
  -3  -4   6  959.46   22.27
  -3   4   6  918.92   13.69
  -3   4   5 2795.35   45.21
   3   4  -5 2814.51   45.22
  -3   4   5 2607.46   34.45
  -3   4   4   83.53    6.36
  -3   4   4   81.96    3.14
   3   4  -4   94.81    6.55
  -3   4   3 1248.22   25.09
  -3   4   3 1189.94   18.55
   3   4  -3 1243.43   25.09
  -3   4   2  362.49   11.92
   3  -4  -2  365.19   11.88
  -3   4   2  333.63    8.16
   3   4  -2  373.36   12.01
   3  -4  -2  360.11    8.44
  -3   4   2  373.71    6.82
  -3   4   1  307.55   10.78
   3  -4  -1  302.96   10.59
   3  -4  -1  304.82    8.24
  -3   4   1  271.01    7.84
  -3   4   1  302.58    7.11
  -3   4   0  313.15   10.81
   3  -4   0  290.85   10.37
   3  -4   0  290.62    8.70
  -3   4   0  289.65    7.83
  -3   4   0  297.41    8.82
   3  -4   1   21.32    3.85
  -3   4  -1   14.11    3.78
   3  -4   1   20.04    3.50
  -3   4  -1   25.05    3.49
  -3   4  -2  133.16    7.38
   3  -4   2  138.47    7.20
   3  -4   2  141.10    7.06
  -3   4  -2  139.07    6.85
   3   4   3 4529.20   66.38
  -3   4  -3 4496.13   66.11
   3  -4   3 4457.44   65.60
   3  -4   3 4537.86   65.38
  -3   4  -3 4474.16   65.24
   3   4   4  164.59    8.23
   3  -4   4  161.61    8.13
   3  -4   4  176.38    8.45
  -3   4  -4  174.75    8.46
   3  -4   5  862.77   20.50
   3   4   5  880.68   20.87
   3  -4   5  902.89   21.60
  -3   4  -5  952.79   22.06
   3  -4   6   62.45    5.70
   3   4   6   69.68    6.27
   3  -4   6   62.69    6.10
  -3   4  -6   55.58    5.36
   3  -4   7  159.83    8.78
   3  -4   7  174.67    9.68
   3   4   7  164.00    9.13
  -3   4  -7  194.68    9.82
  -3   4  -7  184.74    9.90
   3  -4   8    3.27    3.28
   3   4   8   -0.75    3.33
  -3   4  -8    0.73    3.00
  -3   4  -8    5.12    3.72
   3  -4   8    3.31    3.55
   3  -4   9  354.23   14.10
  -3  -4  -9  384.66   14.73
   3  -4   9  357.86   15.12
   3   4   9  358.84   14.31
   3  -4  10   18.32    4.66
   3   4  10   15.07    4.62
  -3  -4 -10    9.79    3.91
   3  -4  10   14.94    4.56
   3   4  11   98.15    8.35
   3  -4  11  105.23    9.25
   3   4  12   11.31    4.92
   3  -4  12   15.33    5.17
   3  -4  13 1066.57   31.08
   3  -4  14   55.94    7.80
   3  -4  15  389.37   19.18
   3   4  15  362.31   17.37
   3   4  16    2.12    5.05
   3  -4  16   -2.20    5.41
   3  -4  17  250.52   16.69
   3   4  17  240.56   16.11
   3   4  18   12.93    5.02
   3  -4  18   -2.14    5.93
   3   4  19  220.89   15.30
   3   4  20    4.41    6.60
  -3  -5  20   31.07    7.35
  -3  -5  19  180.32   14.02
  -3  -5  18  148.96   12.55
  -3  -5  17  682.81   25.50
  -3  -5  16   65.02    8.45
  -3   5  16   63.50    5.45
  -3   5  15 1380.79   27.30
  -3  -5  15 1419.51   36.68
   3  -5 -14  459.80   13.32
  -3  -5  14  446.79   18.85
  -3   5  14  416.51   12.42
   3  -5 -13  274.30    9.40
  -3  -5  13  268.92   14.29
  -3   5  13  274.44    9.33
   3  -5 -12  197.76    7.46
  -3  -5  12  180.66   11.48
  -3   5  12  191.34    7.38
  -3  -5  11 1020.86   17.24
   3  -5 -11 1016.60   18.73
  -3  -5  11 1025.73   27.55
  -3   5  11  999.49   18.73
  -3  -5  10   11.10    1.57
  -3  -5  10   11.19    4.20
  -3   5  10    8.90    2.12
   3   5  -9 1150.25   28.09
  -3  -5   9 1079.67   27.26
  -3  -5   8    1.51    3.67
   3   5  -8    1.52    3.08
  -3   5   7 1112.17   26.71
   3   5  -7 1137.98   26.78
  -3  -5   7 1096.33   26.39
  -3   5   7 1112.97   17.59
  -3   5   6   80.48    7.11
   3   5  -6   84.05    6.65
  -3   5   6   86.31    3.58
  -3   5   5  453.93   15.28
   3   5  -5  492.54   15.79
  -3   5   5  455.07    9.40
  -3   5   4  304.39   12.17
  -3   5   4  300.18    7.64
   3   5  -4  330.18   12.35
  -3   5   3 3210.98   51.28
   3   5  -3 3089.17   40.60
  -3   5   3 3187.66   43.92
   3   5  -3 3275.22   51.93
  -3   5   2   93.26    6.70
  -3   5   2   93.55    4.59
   3  -5  -2   93.60    4.64
   3   5  -2  104.06    6.98
   3  -5  -1 4501.98   66.34
  -3   5   1 4469.76   66.17
  -3   5   1 4394.53   61.56
   3  -5  -1 4449.08   61.45
   3  -5   0 1234.15   25.43
  -3   5   0 1245.41   25.26
   3  -5   0 1193.10   22.56
  -3   5   0 1186.12   22.62
  -3   5  -1 1189.04   24.54
   3  -5   1 1166.66   24.40
   3  -5   1 1138.27   22.85
  -3   5  -1 1150.82   22.79
  -3   5  -2  475.07   14.41
   3  -5   2  470.48   14.07
   3  -5   2  454.22   13.37
  -3   5  -2  458.70   13.38
  -3   5  -3    2.91    3.40
   3  -5   3    1.73    2.97
   3  -5   3    0.13    3.13
  -3   5  -3    5.03    2.80
   3   5   4    0.02    3.49
   3  -5   4    5.64    2.64
   3  -5   4    5.39    3.54
  -3   5  -4    7.41    3.01
   3   5   5  162.98    8.71
   3  -5   5  158.60    8.44
   3  -5   5  155.03    8.96
  -3   5  -5  170.81    9.05
   3   5   6   -2.90    3.44
   3  -5   6   -0.81    2.77
   3  -5   6    4.86    3.47
  -3   5  -6    4.78    3.51
   3  -5   7  903.74   22.84
   3  -5   7  946.55   25.02
  -3   5  -7 1058.54   25.90
   3   5   7  983.08   23.63
   3  -5   8    8.82    3.26
   3   5   8   -0.53    3.74
   3  -5   8   -1.11    3.80
   3  -5   9  649.82   19.73
   3  -5   9  654.79   21.43
   3   5   9  639.15   19.43
   3  -5  10   14.94    3.95
   3   5  10   13.47    4.48
   3  -5  10   14.60    5.42
   3  -5  11    7.11    3.75
   3   5  11    3.51    3.96
   3  -5  11    5.10    4.76
   3   5  12    6.68    4.50
   3  -5  12    0.12    4.82
   3  -5  13  167.78   12.50
   3  -5  14  100.27    9.97
   3  -5  15  345.72   18.61
   3  -5  16    1.81    5.67
   3   5  16    0.68    5.75
   3  -5  17  125.33   12.38
   3   5  17  109.57   10.70
   3   5  18   38.49    7.88
   3   5  19  116.66   11.93
   3   5  20   12.41    6.83
  -3  -6  19   81.89   10.44
  -3  -6  18   29.13    7.22
  -3  -6  17   -1.41    5.19
  -3  -6  16   41.65    7.84
  -3  -6  15  261.83   15.42
  -3   6  15  235.55    9.45
  -3  -6  14   56.33    8.16
  -3   6  14   46.68    4.53
  -3  -6  13  549.44   21.32
  -3   6  13  525.44   13.44
  -3  -6  12    7.47    1.50
  -3  -6  12    7.62    4.94
  -3   6  12    9.14    2.61
  -3  -6  11   82.64    8.07
  -3   6  11   88.47    4.81
  -3  -6  10  705.94   22.78
  -3  -6   9  128.84    9.42
  -3   6   8  524.19   18.80
  -3   6   8  553.21   11.62
  -3  -6   8  534.49   18.73
  -3   6   7   35.13    5.99
  -3   6   7   37.03    2.88
  -3   6   6    1.42    4.18
   3   6  -6    1.11    3.09
  -3   6   6    3.23    1.79
  -3   6   5  509.26   17.11
   3   6  -5  537.19   17.54
  -3   6   5  514.78   11.54
  -3   6   4   26.90    4.92
   3   6  -4   29.78    4.80
  -3   6   4   22.99    2.58
  -3   6   3 1679.35   33.97
   3   6  -3 1738.62   24.73
  -3   6   3 1711.46   28.29
   3   6  -3 1750.56   35.07
   3   6  -2  391.65    9.38
  -3   6   2  411.58   14.10
  -3   6   2  401.00   11.08
   3   6  -2  436.19   14.95
  -3   6   1   54.56    5.62
   3   6  -1   53.15    5.65
   3  -6  -1   58.33    4.47
  -3   6   1   51.93    4.07
  -3   6   0  122.88    6.50
   3  -6   0  110.79    6.20
   3  -6   0  112.03    7.12
  -3   6   0  109.29    7.29
  -3   6  -1  190.50    9.37
   3  -6   1  189.51    9.26
  -3   6  -1  190.13    8.54
   3  -6   1  182.47    8.51
  -3   6  -2   93.14    7.08
   3  -6   2   86.93    6.32
   3  -6   2   95.36    6.47
  -3   6  -2   86.39    6.25
  -3   6  -3  822.12   21.06
   3  -6   3  832.47   20.77
   3  -6   3  818.49   20.73
  -3   6  -3  841.41   20.87
   3   6   4    3.93    3.39
  -3   6  -4    3.28    3.79
   3  -6   4    2.83    2.99
   3  -6   4   -0.77    3.08
  -3   6  -4    7.47    3.25
   3   6   5  472.89   15.61
   3  -6   5  497.49   15.69
   3  -6   5  491.47   16.69
  -3   6  -5  549.18   17.50
   3   6   6  140.55    8.45
   3  -6   6  135.01    8.19
   3  -6   6  147.40    9.42
  -3   6  -6  158.41    9.63
   3  -6   7  787.76   21.06
   3  -6   7  785.26   23.26
   3   6   7  806.98   21.52
   3   6   8   35.19    5.27
   3  -6   8   38.90    4.69
   3  -6   8   33.41    5.86
   3  -6   9  317.12   13.41
   3  -6   9  344.24   15.81
   3   6   9  320.52   13.74
   3   6  10   42.69    6.13
   3  -6  10   43.28    5.67
   3  -6  10   54.79    7.34
   3  -6  11 1487.20   37.38
   3   6  11 1407.51   33.54
   3   6  12    4.93    4.48
   3  -6  12    4.72    5.37
   3  -6  13  732.56   26.56
   3   6  13  705.14   23.57
   3  -6  14   24.14    6.56
   3  -6  15   15.87    5.91
   3  -6  16   26.22    6.44
   3   6  17  118.94   11.00
   3   6  18   32.39    8.01
   3   6  19  118.61   11.65
  -3  -7  17  312.11   18.52
  -3  -7  16  151.27   13.01
  -3  -7  15   40.84    7.44
  -3  -7  14   32.06    6.72
  -3  -7  13    6.86    5.19
  -3   7  13   11.92    2.90
  -3  -7  12  187.94   13.05
  -3   7  12  178.72    7.22
  -3  -7  11   77.77    8.43
  -3   7  10   72.99    8.56
  -3  -7  10   77.19    8.54
  -3   7  10   78.64    4.69
  -3   7   9  219.52   12.88
  -3   7   9  229.53    7.87
  -3  -7   9  225.97   13.07
  -3   7   8  142.20   10.44
  -3   7   8  152.99    6.18
  -3   7   7  231.29   12.83
  -3   7   7  233.14    7.81
  -3   7   6  324.10   14.70
  -3   7   6  305.75    9.18
  -3   7   5    3.44    3.91
  -3   7   5    3.14    2.32
  -3   7   4    3.84    3.59
   3   7  -4    6.88    1.60
  -3   7   4    9.47    2.53
  -3   7   3  153.38    9.39
   3   7  -3  161.74    5.47
  -3   7   3  154.04    6.97
   3   7  -2  127.31    5.50
  -3   7   2  140.90    9.08
  -3   7   2  119.73    6.26
   3   7  -2  129.81    8.67
  -3   7   1  343.74   13.41
   3   7  -1  358.95   14.25
  -3   7   1  332.63   11.28
  -3   7   0    8.52    4.07
   3   7   0    3.13    2.95
   3  -7   0    0.48    2.75
  -3   7   0    2.81    2.56
  -3   7  -1 1793.17   35.61
   3  -7   1 1802.42   34.35
  -3   7  -1 1846.45   34.50
   3  -7   1 1868.07   35.97
  -3   7  -2  365.16   13.88
   3  -7   2  378.37   13.83
  -3   7  -2  381.99   13.73
   3  -7   2  375.17   13.56
   3  -7   3   86.52    6.68
  -3   7  -3   78.42    6.77
   3  -7   3   77.73    6.58
  -3   7  -3   79.79    6.74
   3   7   4  884.97   22.97
  -3   7  -4  868.04   22.88
   3  -7   4  906.90   22.75
   3  -7   4  868.22   23.53
  -3   7  -4  926.37   23.87
   3   7   5  255.11   11.52
   3  -7   5  237.27   12.01
   3  -7   5  242.73   11.06
   3   7   6  740.05   20.95
   3  -7   6  780.13   23.19
   3  -7   6  765.20   20.99
   3   7   7  352.80   14.01
   3  -7   7  317.66   14.72
   3  -7   7  321.79   13.35
   3   7   8   11.93    4.04
   3  -7   8    5.64    2.92
   3  -7   8    9.73    4.59
   3  -7   9  197.21   10.94
   3  -7   9  222.06   13.38
   3   7   9  216.39   11.47
   3  -7  10  329.51   16.69
   3   7  10  312.49   14.19
   3  -7  11  150.89   11.85
   3   7  11  169.18   10.64
   3  -7  12  574.48   23.56
   3   7  12  544.89   20.04
   3   7  13   -2.03    4.50
   3  -7  13    5.89    4.97
   3  -7  14  225.29   15.54
   3  -7  15  866.57   31.41
   3   7  18  166.69   13.46
  -3  -8  16  494.87   23.41
  -3  -8  15   38.79    8.29
  -3  -8  14   19.86    6.65
  -3  -8  13  558.23   23.64
  -3   8  12  319.04   17.58
  -3  -8  12  336.87   17.70
  -3   8  11   37.78    7.31
  -3  -8  11   26.43    6.17
  -3   8  10  635.81   23.85
  -3  -8  10  619.77   25.56
  -3   8   9   45.96    7.25
  -3   8   9   40.95    3.93
  -3   8   8  616.53   22.31
  -3   8   8  626.37   14.90
  -3   8   7    3.71    4.73
  -3   8   7    4.34    2.45
  -3   8   6  864.06   25.74
  -3   8   6  828.34   18.57
  -3   8   5  866.17   25.21
  -3   8   5  889.38   19.66
  -3   8   4   21.61    5.50
   3   8  -4   16.13    2.10
  -3   8   4   10.52    2.55
   3   8  -3  605.82   12.88
  -3   8   3  585.65   19.50
  -3   8   3  587.54   16.01
   3   8  -2  955.12   19.00
  -3   8   2  928.45   24.87
  -3   8   2  941.41   21.69
  -3   8   1   39.83    5.39
   3   8  -1   38.82    4.09
  -3   8   1   27.19    3.68
  -3   8   0 1133.96   27.67
  -3   8   0 1131.27   25.73
  -3   8  -1  142.63    8.90
  -3   8  -1  151.03    8.75
   3  -8   1  152.44    9.03
  -3   8  -2  167.49   10.05
   3  -8   2  161.54    9.47
  -3   8  -2  171.58    9.57
   3  -8   2  169.74    9.77
  -3   8  -3  271.69   12.44
   3  -8   3  272.32   12.43
   3  -8   3  276.22   12.78
  -3   8  -3  316.67   13.57
   3   8   4   30.51    5.62
   3  -8   4   22.14    4.82
   3  -8   4   31.24    4.83
  -3   8  -4   28.52    5.47
   3   8   5   88.22    7.76
   3  -8   5   77.26    7.67
   3  -8   5   78.33    7.00
   3   8   6  308.80   13.52
   3  -8   6  325.02   15.39
   3  -8   6  336.14   13.81
   3   8   7    3.02    3.73
   3  -8   7    4.78    3.28
   3  -8   7    6.80    4.94
   3  -8   8  871.73   24.22
   3  -8   8  922.20   28.03
   3   8   8  931.75   24.87
   3   8   9    0.42    4.18
   3  -8   9   -1.10    4.71
   3  -8  10  455.18   20.26
   3   8  10  427.24   16.91
   3   8  11   14.31    5.03
   3  -8  11    5.96    5.56
   3   8  12   27.12    5.73
   3  -8  12   21.43    6.03
   3   8  13   33.07    6.46
   3  -8  13   43.58    8.16
   3  -8  14  216.21   15.87
  -3  -9  14  290.64   17.91
  -3   9  14  303.01   18.99
  -3  -9  13    4.36    5.94
  -3   9  13    5.36    5.73
  -3   9  12  807.18   29.43
  -3   9  11  122.05   11.85
  -3   9  10  121.34   11.32
  -3   9   9   -3.46    4.86
  -3   9   8    1.11    4.93
  -3   9   7   14.16    3.39
  -3   9   7    9.63    5.44
  -3   9   6  957.71   21.74
  -3   9   6  934.85   28.16
  -3   9   5   31.68    1.73
  -3   9   5   38.71    4.54
  -3   9   5   41.69    6.43
   3   9  -4 1141.99   19.24
  -3   9   4 1122.29   25.01
  -3   9   4 1113.73   30.01
   3   9  -3   86.68    4.92
  -3   9   3   85.22    8.14
  -3   9   3   80.03    6.03
  -3   9   2   63.15    6.56
   3   9  -2   67.51    4.83
  -3   9   2   50.60    4.94
  -3   9   1   70.84    7.23
   3   9  -1   76.02    6.00
  -3   9   1   76.23    6.45
   3   9   0   75.41    5.82
  -3   9   0   82.81    7.66
  -3   9   0   73.17    6.64
   3   9   1   10.02    3.65
  -3   9  -1    1.44    4.06
  -3   9  -1    7.76    3.68
  -3   9  -2 1389.18   32.42
   3  -9   2 1368.50   32.09
  -3   9  -3  139.38    9.27
   3  -9   3  132.37    9.74
  -3   9  -4  944.12   25.85
   3   9   4  955.48   25.76
   3  -9   4  959.33   26.96
   3  -9   4  918.56   25.17
   3   9   5    4.38    4.10
   3  -9   5    3.70    4.68
   3  -9   5   -1.59    3.18
   3   9   6   36.99    5.69
   3  -9   6   38.93    6.64
   3   9   7   16.42    4.84
   3  -9   7    3.83    4.72
   3   9   8   19.37    5.08
   3  -9   8   10.68    5.56
   3  -9   9  151.66   11.97
   3   9   9  147.14   10.18
   3   9  10   62.54    7.26
   3  -9  10   68.64    8.94
   3   9  11   12.47    4.77
   3  -9  11   11.15    6.22
   3  -9  12  398.29   20.79
   3   9  12  341.25   16.77
   3   9  13    6.70    5.13
   3  -9  13    6.58    6.86
  -3  10  13   92.70   11.22
  -3  10  12   13.87    7.06
  -3  10  11    0.93    5.37
  -3  10  10  748.34   28.31
  -3  10   9    9.89    5.86
  -3  10   8 1159.04   34.38
  -3  10   7   10.60    5.73
  -3  10   6  168.97   12.34
  -3  10   5   60.22    7.56
  -3  10   4  181.20   12.25
  -3  10   4  149.31    8.73
   3  10  -3   20.79    3.05
  -3  10   3   16.87    4.26
  -3  10   3   12.31    2.99
  -3  10   2  351.38   13.96
  -3  10   2  331.01   15.53
   3  10  -2  364.09   11.62
  -3  10   1  203.58   12.30
   3  10  -1  202.59    9.27
  -3  10   0  883.76   25.88
   3  10   0  937.09   22.80
  -3  10  -1  319.74   14.65
   3  10   1  296.29   12.65
  -3  10  -2  546.80   19.73
   3  10   2  515.85   17.62
   3 -10   3    8.83    4.80
  -3  10  -3    1.27    5.31
  -3  10  -4  139.93   10.58
   3  10   4  137.32    9.82
   3 -10   4  131.04   10.39
   3  10   5   49.08    6.90
   3 -10   5   32.96    5.97
   3  10   6  670.86   21.67
   3 -10   6  680.92   24.45
   3  10   7   16.73    4.85
   3 -10   7   15.21    5.18
   3 -10   8  444.36   20.38
   3  10   8  437.98   17.47
   3  10   9    4.94    4.98
   3 -10   9   -0.01    4.99
   3 -10  10  123.29   11.87
   3  10  10  122.02    9.78
   3 -10  11   28.74    7.66
  -3  11  11   27.30    8.05
  -3  11  10   -2.28    6.11
  -3  11   9  108.22   11.28
  -3  11   8    2.62    5.75
  -3  11   7   97.56   10.10
  -3  11   6   85.40    9.60
  -3  11   5    9.50    5.29
  -3  11   4  541.46   21.56
  -3  11   3    1.30    4.64
  -3  11   2  216.27   13.24
  -3  11   1  217.15   13.12
   3  11   0   16.60    4.21
  -3  11   0   12.29    3.89
  -3  11  -1  109.79    9.28
   3  11   1  127.47    8.71
  -3  11  -2  223.72   12.92
   3  11   2  229.54   12.05
   3  11   3    1.45    4.19
  -3  11  -3   -2.05    4.92
  -3  11  -4  381.66   17.50
   3  11   4  382.85   17.06
   3  11   4  362.02   16.21
   3  11   5    5.87    5.29
   3 -11   5   10.44    5.34
   3  11   6  578.69   20.70
   3 -11   6  595.59   24.00
   3  11   7   21.95    5.35
   3 -11   7   32.42    7.27
   3 -11   8   19.68    6.89
   3 -11   9   69.64    9.65
   3 -11  10  341.28   19.84
  -3  12   9    3.98    5.39
  -3  12   8   35.03    7.20
  -3  12   7   12.64    6.08
  -3  12   6  106.42   10.83
  -3  12   5   32.23    5.29
  -3  12   4   45.30    6.85
  -3  12   3   88.83    9.18
  -3  12   2  249.30   14.84
  -3  12   1   18.08   10.26
  -3  12   0   96.57    9.18
  -3  12  -1    1.58    4.29
  -3  12  -2   60.38    6.69
  -3  12  -3  159.41   11.76
   3  12   4    3.02    4.93
   3  12   4   -0.91    4.49
  -3  12  -4   14.38    7.16
   3  12   5  206.33   13.44
   3  12   6   97.81   10.27
   3 -12   7   49.25    8.71
   3 -12   8  168.49   14.16
  -3  13   6  273.86   17.09
  -3  13   5   35.20    6.12
  -3  13   4   31.08    6.48
  -3  13   3  226.11   15.12
  -3  13   2   -7.76    6.64
  -3  13   1  402.22   19.09
  -3  13   0    8.82    4.54
  -4   0  21    6.88    5.00
  -4   0  20  317.50   15.58
  -4   0  19    5.74    4.65
  -4   0  18   -0.92    4.02
  -4   0  17   -3.68    3.72
  -4   0  16  152.24    9.44
  -4   0  15    2.35    3.37
  -4   0  14 1902.64   36.25
   4   0 -14 1928.86   36.43
  -4   0  13   -1.77    2.80
   4   0 -13    4.65    2.69
  -4   0  12 1996.62   35.43
   4   0 -12 2019.63   35.68
  -4   0  11   -3.27    2.73
   4   0 -11    3.02    2.46
  -4   0  10   31.43    3.70
   4   0 -10   30.69    3.55
  -4   0   9    0.73    2.42
   4   0  -9    1.90    2.10
   4   0  -8 3388.79   48.39
  -4   0   8 3351.62   48.22
  -4   0   8 3412.74   50.61
   4   0  -7   -0.54    1.90
  -4   0   7    2.04    2.21
  -4   0   7    2.50    2.85
   4   0  -6 4507.47   61.09
  -4   0   6 4681.87   63.64
   4   0  -5    2.15    1.85
  -4   0   5    3.08    2.89
   4   0  -4  502.44   11.88
  -4   0   4  494.68   11.83
   4   0  -3   -1.99    2.59
  -4   0   3    1.86    3.22
  -4   0   2   82.36    5.39
   4   0  -2   75.36    4.62
  -4   0   1   -2.65    3.65
   4   0  -1    3.30    2.78
   4   0   0 3642.84   52.75
   4   0   0 3718.13   52.74
   4   0   1    2.66    2.89
   4   0   1    3.46    3.74
  -4   0  -2 3486.17   51.77
   4   0   2 3472.70   51.28
   4   0   3    1.67    3.69
  -4   0  -3    4.34    3.09
   4   0   4    9.78    3.87
  -4   0  -4    8.03    3.10
   4   0   5    5.79    4.03
  -4   0  -5   -3.45    3.21
  -4   0  -6 1214.62   25.88
   4   0   6 1183.90   25.92
   4   0   7    1.79    3.80
  -4   0  -7    1.10    3.12
  -4   0  -8    0.75    3.09
   4   0   8    1.94    3.67
  -4   0  -9    1.14    3.03
   4   0   9   -0.36    3.65
   4   0  10 1333.92   31.78
   4   0  11   -6.30    4.72
   4   0  12  468.42   18.80
   4   0  13   -5.50    4.73
   4   0  14    7.12    5.30
   4   0  15    9.68    5.44
   4   0  16  249.87   15.89
   4   0  17   -2.18    5.16
   4   0  18  186.72   14.45
   4   0  19   -7.23    6.41
  -4  -1  22    1.88    4.86
  -4  -1  21  173.62   12.44
  -4  -1  20  257.48   14.68
  -4   1  20  241.54   13.04
  -4  -1  19  227.03   13.45
  -4   1  19  241.46   12.60
  -4  -1  18  350.44   15.87
  -4   1  18  342.41   14.36
  -4  -1  17   45.60    6.28
  -4   1  17   58.69    6.28
  -4  -1  16   35.78    5.89
  -4   1  16   32.65    4.86
  -4  -1  15  421.74   15.78
  -4   1  15  445.53   14.67
   4   1 -15  439.46   16.03
  -4  -1  14   -1.18    3.67
  -4   1  14   -0.10    2.98
   4   1 -14    1.75    2.88
  -4  -1  13  140.09    8.49
  -4   1  13  141.39    7.45
   4   1 -13  148.51    8.55
  -4  -1  12  663.30   18.11
  -4   1  12  654.17   15.98
   4   1 -12  680.29   18.36
  -4   1  11  111.66    5.88
  -4  -1  11  132.45    7.44
   4  -1 -11  120.91    5.95
   4   1 -11  114.85    7.02
  -4   1  10  925.63   18.25
   4   1 -10  932.04   20.80
  -4  -1  10  942.99   20.76
   4  -1 -10  946.67   18.37
  -4   1   9   -0.32    1.90
  -4  -1   9   -5.10    2.92
   4  -1  -9   -0.34    1.67
   4   1  -9   -3.20    2.27
  -4   1   8 2690.42   43.64
  -4  -1   8 2696.60   40.44
   4   1  -8 2699.35   41.85
  -4  -1   8 2719.13   41.80
  -4   1   8 2666.34   37.94
   4  -1  -8 2683.94   38.28
  -4   1   7 3073.41   47.44
  -4  -1   7 3112.61   44.25
   4  -1  -7 3021.23   41.69
   4   1  -7 3065.01   45.68
  -4  -1   7 3077.95   45.58
  -4  -1   6    6.17    2.44
  -4   1   6    1.48    3.25
   4   1  -6    0.06    2.29
   4  -1  -6    2.06    1.42
   4  -1  -5 1232.08   18.40
   4   1  -5 1243.88   21.99
  -4  -1   5 1292.50   20.88
  -4   1   5 1281.57   23.60
  -4  -1   4  656.03   12.82
   4   1  -4  640.94   13.82
   4   1  -4  634.44   12.78
  -4   1   4  633.87   14.85
   4  -1  -4  640.28   14.94
   4  -1  -3  926.61   18.63
  -4   1   3  927.90   18.58
   4   1  -3  917.62   16.53
  -4  -1   3  933.84   16.63
   4  -1  -2 3258.57   48.00
  -4   1   2 3392.30   48.27
   4   1  -2 3213.50   45.55
  -4  -1   2 3318.15   45.88
   4  -1  -1  588.21   13.90
   4   1  -1  595.54   12.87
  -4   1   1  616.84   14.44
   4  -1  -1  580.91   12.71
   4  -1   0  781.01   15.59
   4   1   0  777.88   15.73
   4  -1   0  755.12   16.54
  -4   1   0  777.79   17.14
  -4   1   0  742.67   15.70
  -4   1  -1  213.57    7.93
   4   1   1  209.30    8.89
   4  -1   1  213.35    8.38
   4  -1   1  218.99    7.99
   4  -1   2   49.23    4.70
   4  -1   2   37.81    4.38
   4   1   2   44.59    5.36
  -4   1  -2   39.71    4.05
  -4   1  -3  778.00   17.49
   4  -1   3  750.64   18.04
   4   1   3  721.40   17.65
  -4  -1  -3  767.93   18.14
   4  -1   3  769.95   17.51
  -4  -1  -4  168.36    8.16
   4   1   4  182.74    8.66
   4  -1   4  174.14    8.38
  -4   1  -4  178.26    8.22
   4   1   5    3.10    3.53
   4  -1   5   -1.00    3.59
  -4   1  -5    6.93    3.50
  -4  -1  -5    5.00    3.06
   4  -1   5    4.72    3.34
  -4  -1  -6 4301.35   65.49
   4   1   6 4288.96   65.47
  -4   1  -6 4239.77   65.01
   4  -1   6 4261.40   65.54
  -4   1  -7   23.99    4.11
  -4  -1  -7   27.82    4.56
   4   1   7   26.45    5.04
   4  -1   7   25.48    4.20
  -4  -1  -8 1502.10   31.54
   4  -1   8 1435.94   31.68
   4   1   8 1458.73   31.53
  -4   1  -8 1490.86   31.47
  -4  -1  -9  272.50   12.45
   4  -1   9  255.64   12.47
   4   1   9  263.76   12.44
  -4   1  -9  272.70   12.48
   4  -1  10   10.31    4.10
   4   1  11   14.74    4.82
   4  -1  11    2.76    4.33
   4   1  12  119.20    9.75
   4  -1  12  115.26    9.91
   4  -1  13   53.24    7.40
   4   1  13   38.53    6.59
   4   1  14  777.50   26.26
   4  -1  14  760.01   26.11
   4  -1  15   47.19    7.77
   4   1  15   51.77    7.82
   4   1  16  432.05   20.41
   4  -1  16  423.50   20.21
   4   1  17   11.38    5.56
   4  -1  17    5.98    5.23
   4  -1  18   61.27    9.37
   4   1  18   70.81    9.85
   4   1  19   78.89   10.11
  -4  -2  23    3.53    6.41
  -4  -2  22  237.29   15.85
  -4  -2  21  266.47   15.90
  -4  -2  20   75.32    8.90
  -4   2  19  104.03    8.04
  -4  -2  19  118.91   10.33
  -4  -2  18   53.65    7.28
  -4   2  18   46.70    5.95
  -4  -2  17    6.06    4.61
  -4   2  17    5.44    3.64
  -4  -2  16  145.21   10.29
  -4   2  16  152.19    8.48
   4  -2 -16  116.22    8.66
   4  -2 -15    0.17    3.09
  -4   2  15    1.86    2.91
  -4  -2  15    0.80    3.64
  -4  -2  14  141.55    9.35
  -4   2  14  147.48    7.60
   4   2 -14  151.44    9.57
  -4  -2  13    6.30    3.88
  -4   2  13    3.77    2.49
   4   2 -13    3.19    3.16
  -4  -2  12    0.81    3.13
  -4   2  12    2.99    2.34
   4   2 -12    5.08    2.96
   4   2 -11  560.56   16.73
  -4   2  11  517.71   12.32
  -4  -2  11  535.56   16.26
  -4   2  10   17.02    2.53
  -4  -2  10   22.40    4.08
   4   2 -10   17.63    3.70
   4   2  -9  330.98   11.67
  -4  -2   9  339.93   11.87
  -4   2   9  332.71    7.91
   4   2  -8   21.22    3.35
  -4  -2   8   19.48    3.62
  -4   2   8   20.08    1.93
  -4  -2   8   18.27    2.51
  -4   2   8   23.58    4.51
   4   2  -7  129.50    6.78
  -4  -2   7  137.99    7.11
  -4   2   7  127.29    7.60
  -4  -2   7  138.48    5.10
   4   2  -6 1547.33   27.93
  -4  -2   6 1539.80   23.21
  -4   2   6 1572.47   29.29
  -4  -2   5  107.28    4.03
   4   2  -5  108.77    5.91
  -4   2   5  104.49    6.69
  -4  -2   4 2014.36   28.34
   4  -2  -4 2007.69   33.75
   4   2  -4 1946.57   28.15
  -4   2   4 1962.69   33.51
   4   2  -4 2014.39   32.84
   4  -2  -3    4.88    3.10
   4   2  -3    4.52    2.00
  -4   2   3    2.89    3.54
   4  -2  -3    3.64    1.85
   4  -2  -3    5.68    1.35
   4  -2  -2   -2.66    3.05
  -4   2   2    8.01    3.94
   4   2  -2    3.70    2.05
   4  -2  -2    2.00    1.98
   4  -2  -2    6.83    1.86
   4  -2  -1  966.07   19.87
  -4   2   1  955.41   19.91
  -4   2   1  914.22   16.89
   4  -2  -1  947.26   16.56
   4  -2  -1  960.00   16.36
   4  -2   0  114.87    6.46
  -4   2   0  122.13    5.48
  -4   2   0  127.59    7.26
   4  -2   0  132.91    5.62
   4  -2   0  125.56    5.50
  -4   2  -1  339.79    9.71
   4  -2   1  317.64   10.71
  -4   2  -1  333.51   11.37
   4  -2   1  345.13    9.72
   4  -2   1  349.02    9.87
   4  -2   2 1956.45   34.30
   4   2   2 2000.55   34.74
  -4   2  -2 1990.03   32.54
   4  -2   2 1998.60   32.79
   4  -2   2 2043.24   32.66
   4   2   3  243.70    9.88
   4  -2   3  217.65    9.42
  -4   2  -3  235.77    9.01
   4  -2   3  236.21    9.29
   4  -2   3  250.53    9.21
   4  -2   4 5061.87   74.39
   4   2   4 5067.50   74.15
   4  -2   4 5124.43   73.60
  -4   2  -4 5180.52   73.08
   4  -2   5  343.17   12.52
  -4  -2  -5  336.14   12.47
   4  -2   5  329.45   12.10
  -4   2  -5  342.37   11.92
   4   2   5  336.91   12.46
  -4  -2  -6  234.22   10.75
  -4   2  -6  228.43   10.10
   4  -2   6  212.22   10.20
   4   2   6  213.46   10.18
  -4  -2  -7  717.45   19.88
   4   2   7  676.69   19.32
  -4   2  -7  724.21   19.70
   4  -2   7  685.25   19.63
  -4  -2  -8 1861.66   36.99
  -4   2  -8 1913.67   37.19
   4  -2   8 1808.10   37.34
   4   2   8 1835.56   36.88
  -4  -2  -9  119.43    8.55
  -4   2  -9  117.93    8.55
   4   2   9  115.08    8.60
   4  -2   9  110.40    8.53
   4   2  10  685.01   21.38
   4  -2  10  698.95   22.16
   4  -2  11   45.01    6.66
   4  -2  12  172.11   11.92
   4  -2  13  440.01   18.98
   4   2  13  402.33   17.89
   4   2  14  105.50    9.59
   4  -2  14  115.55   10.59
   4  -2  15  540.00   22.88
   4   2  15  546.45   22.22
   4  -2  16  282.75   16.95
   4   2  16  235.41   15.08
   4  -2  17   15.70    6.71
   4   2  17    2.80    5.19
   4  -2  18  302.25   18.45
   4   2  18  292.31   17.88
   4   2  19   16.19    6.58
  -4  -3  22    0.48    5.14
  -4  -3  21  202.02   14.77
  -4  -3  20  143.01   12.00
  -4  -3  19   97.71    9.75
  -4   3  18   78.82    6.90
  -4  -3  18   67.44    8.04
  -4   3  17   52.29    5.60
  -4  -3  17   41.55    6.91
  -4   3  16  108.34    7.02
  -4  -3  16  107.67    9.15
   4  -3 -16  114.29    8.14
  -4   3  15  265.04   10.19
  -4  -3  15  272.29   13.72
   4  -3 -15  258.93   11.46
   4  -3 -14   34.21    4.42
  -4  -3  14   42.62    6.09
  -4   3  14   33.58    3.83
  -4  -3  13  782.04   22.60
  -4   3  13  751.33   16.57
   4  -3 -13  764.99   18.51
   4   3 -12 1350.95   30.29
  -4   3  12 1281.77   22.32
  -4  -3  12 1287.63   29.60
   4  -3 -12 1228.35   24.68
   4  -3 -11    0.88    1.89
  -4   3  11    4.68    1.90
  -4  -3  11   -0.39    3.33
   4   3 -11    5.88    3.22
  -4   3  10 1154.21   18.40
   4   3 -10 1223.67   27.09
  -4  -3  10 1159.75   26.50
  -4  -3   9   65.20    5.98
   4   3  -9   67.58    5.75
  -4   3   9   62.80    2.60
  -4  -3   9   63.15    3.50
   4   3  -8  161.77    8.50
  -4  -3   8  176.50    8.94
  -4   3   8  164.75    9.35
  -4  -3   8  176.42    5.10
   4   3  -7  507.28   14.94
  -4   3   7  508.37   15.89
  -4  -3   7  510.22    8.99
   4   3  -6   17.15    3.61
  -4   3   6   13.42    4.26
  -4  -3   6   15.95    1.48
   4   3  -5  931.00   20.72
  -4   3   5  906.80   21.22
   4  -3  -4    6.48    1.08
  -4   3   4    5.16    3.46
   4   3  -4    7.74    1.47
   4   3  -4    3.67    2.65
   4   3  -3  444.95    8.65
   4  -3  -3  481.28   13.83
  -4   3   3  462.79   13.71
   4  -3  -3  438.14    7.92
   4  -3  -3  471.67    8.15
   4  -3  -2  131.42    7.27
  -4   3   2  135.90    7.88
   4  -3  -2  127.64    4.41
   4  -3  -2  137.98    4.42
  -4   3   1  124.51    4.84
  -4   3   1  121.34    7.13
   4  -3  -1  132.66    7.08
   4  -3  -1  132.42    5.18
   4  -3   0  307.58   10.95
  -4   3   0  312.94   11.11
  -4   3   0  323.85    8.70
   4  -3   0  316.72    8.98
   4  -3   1 1830.69   32.65
  -4   3  -1 1858.20   33.18
  -4   3  -1 1817.62   29.39
   4  -3   1 1831.58   30.08
   4  -3   2   17.19    3.62
  -4   3  -2   28.64    4.93
   4   3   2   20.32    4.45
  -4   3  -2   25.35    3.58
   4  -3   2   24.70    4.13
   4   3   3 1700.33   31.99
   4  -3   3 1634.43   31.23
  -4   3  -3 1714.04   29.83
   4  -3   3 1643.36   30.17
   4  -3   4  296.92   11.55
   4   3   4  298.86   11.70
  -4   3  -4  304.11   10.89
   4  -3   4  312.14   11.41
   4  -3   5 1041.98   24.22
   4   3   5 1013.63   23.77
  -4   3  -5 1088.44   23.60
   4  -3   5 1040.05   23.78
   4  -3   6   15.41    4.06
  -4   3  -6   21.55    4.37
   4   3   6   21.09    4.57
   4  -3   6   18.03    4.11
   4  -3   7  421.43   15.12
  -4  -3  -7  454.86   15.66
  -4   3  -7  465.81   15.70
   4  -3   7  425.42   15.44
   4   3   7  439.13   15.29
   4  -3   8  112.64    7.98
  -4  -3  -8  117.70    8.33
   4   3   8  123.95    8.80
   4  -3   8  116.19    8.69
  -4   3  -8  129.17    8.62
  -4  -3  -9  873.40   24.07
   4  -3   9  843.04   24.08
   4   3   9  832.16   23.39
   4  -3  10  197.55   11.99
   4   3  10  209.48   11.81
   4  -3  11  915.66   27.03
   4   3  11  894.76   25.93
   4  -3  12    7.52    4.91
   4  -3  13  202.26   13.33
   4  -3  14  174.67   12.94
   4   3  14  159.78   12.10
   4  -3  15  263.26   16.09
   4   3  15  226.96   14.61
   4   3  16   54.61    8.31
   4  -3  16   70.45    9.36
   4  -3  17  366.71   19.63
   4   3  17  336.86   18.83
   4   3  18    7.00    5.65
   4  -3  18    9.17    5.29
   4   3  19   77.19   10.23
  -4  -4  21    4.10    5.81
  -4  -4  20  153.97   12.75
  -4  -4  19  400.40   19.59
  -4  -4  18   14.72    5.92
  -4  -4  17 1102.81   31.99
  -4   4  16    3.85    2.54
  -4  -4  16    3.73    4.37
  -4   4  15  132.64    6.86
  -4  -4  15  128.97   10.13
   4  -4 -15  140.93    7.64
   4  -4 -14   25.95    3.59
  -4  -4  14   22.26    5.35
  -4   4  14   22.40    3.10
  -4   4  13  243.80    8.09
  -4  -4  13  247.09   12.96
   4  -4 -13  256.10    9.13
  -4  -4  12   54.59    6.53
  -4   4  12   53.55    3.59
   4  -4 -12   61.83    4.24
  -4   4  11  889.75   15.77
  -4  -4  11 1038.66   26.04
   4  -4 -11 1008.93   17.89
   4  -4 -10   22.95    2.41
  -4  -4  10   25.50    2.17
  -4   4  10   19.80    1.67
  -4  -4  10   25.06    4.68
   4   4 -10   27.42    4.60
  -4  -4   9 1272.91   17.88
  -4   4   9 1280.10   29.88
  -4  -4   9 1287.59   29.07
   4   4  -9 1333.13   29.49
   4  -4  -9 1286.43   19.19
  -4  -4   8  725.57   20.13
   4   4  -8  757.80   20.56
  -4   4   8  751.00   21.15
   4   4  -7  894.60   22.10
  -4   4   7  844.98   22.34
   4   4  -6  160.30    8.78
  -4   4   6  145.53    8.66
   4   4  -5 1240.39   26.59
  -4   4   5 1266.41   27.08
   4   4  -4    2.57    2.88
  -4   4   4   -1.62    3.69
   4   4  -3 3519.68   45.45
   4  -4  -3 3589.01   55.60
  -4   4   3 3580.29   55.32
   4   4  -3 3546.64   55.30
   4  -4  -3 3463.29   46.09
  -4   4   2   42.32    2.55
   4  -4  -2   49.81    5.26
  -4   4   2   35.57    4.93
   4  -4  -2   36.91    2.86
  -4   4   2   42.72    3.06
  -4   4   1  645.54   17.21
   4  -4  -1  654.19   17.38
   4  -4  -1  630.28   13.27
  -4   4   1  635.65   13.40
  -4   4   1  639.53   12.36
  -4   4   0  189.97    9.22
   4  -4   0  199.28    9.04
   4  -4   0  200.52    7.34
  -4   4   0  200.99    7.33
  -4   4   0  196.86    6.71
  -4   4  -1  231.07   10.23
   4  -4   1  252.08   10.33
   4  -4   1  233.73    8.53
  -4   4  -1  233.08    8.59
  -4   4  -1  250.64    8.30
  -4   4  -2  198.25    9.69
   4  -4   2  204.72    9.32
   4  -4   2  201.82    8.61
  -4   4  -2  197.46    8.35
  -4   4  -2  202.79    8.18
   4  -4   3   45.83    5.23
   4   4   3   42.90    5.27
  -4   4  -3   50.05    4.76
  -4   4  -3   43.95    4.58
   4  -4   3   41.51    4.82
   4  -4   4   -0.82    2.92
  -4   4  -4   -0.19    2.69
   4   4   4   -0.84    3.58
   4  -4   4    2.11    3.09
  -4   4  -4    4.25    3.20
   4  -4   5  462.65   15.15
   4   4   5  461.35   15.16
   4  -4   5  466.09   15.36
  -4   4  -5  470.91   15.26
  -4   4  -5  477.55   14.82
   4  -4   6   27.22    4.92
   4   4   6   32.04    4.95
  -4   4  -6   27.04    4.70
   4  -4   6   32.99    5.43
   4  -4   7 1864.74   37.55
   4  -4   7 1856.22   38.06
   4   4   7 1841.31   37.01
  -4   4  -7 1996.62   37.95
   4  -4   8    9.84    4.01
   4   4   8    6.59    3.85
  -4   4  -8   16.06    4.24
   4  -4   8    7.96    4.20
   4  -4   9   33.05    5.68
   4   4   9   26.82    5.12
   4  -4   9   29.51    5.77
   4   4  10   12.65    4.71
   4  -4  10   22.15    5.28
   4  -4  11  291.02   15.25
   4   4  11  281.96   14.32
   4   4  12   61.31    7.56
   4  -4  12   45.65    7.13
   4  -4  13  387.30   18.63
   4  -4  14  280.86   16.29
   4  -4  15  376.33   19.36
   4   4  15  354.43   18.18
   4   4  16   28.03    6.91
   4  -4  16   18.54    6.93
   4  -4  17  286.83   18.08
   4   4  17  257.45   16.17
   4   4  18    6.76    5.56
   4   4  19   -3.47    5.28
  -4  -5  20    3.66    5.17
  -4  -5  19   36.68    7.60
  -4  -5  18   25.67    6.32
  -4  -5  17  150.70   12.08
  -4  -5  16  124.22   10.65
  -4   5  15  404.88   11.43
  -4  -5  15  478.49   19.93
  -4   5  14   58.04    4.07
  -4  -5  14   70.78    8.06
   4  -5 -13 1187.63   20.79
  -4   5  13 1021.91   18.79
  -4  -5  13 1130.67   30.43
   4  -5 -12  147.76    5.49
  -4  -5  12  142.42    4.36
  -4   5  12  127.18    4.65
  -4  -5  12  129.84    9.57
  -4   5  11  291.33    6.43
  -4  -5  11  339.69   15.12
  -4   5  10   55.17    6.82
  -4  -5  10   57.66    6.75
  -4   5  10   45.22    1.87
  -4   5  10   45.15    1.89
  -4   5   9  557.57   19.19
  -4  -5   9  543.32   18.43
  -4   5   8   75.51    7.50
   4   5  -8   89.04    7.25
  -4   5   7 1336.73   30.79
   4   5  -7 1380.31   30.56
  -4   5   6  401.23   14.96
   4   5  -6  433.93   15.37
  -4   5   5  481.02   16.16
   4   5  -5  503.90   16.24
  -4   5   5  462.75    8.32
  -4   5   4   43.88    5.51
   4   5  -4   46.11    5.10
  -4   5   4   35.50    2.18
  -4   5   3   79.72    6.75
   4   5  -3   86.43    6.61
  -4   5   3   72.23    3.63
  -4   5   2    5.33    1.72
  -4   5   2    5.93    3.86
   4  -5  -2    5.53    3.17
   4  -5  -2    3.16    1.85
  -4   5   2   18.38    2.92
   4  -5  -1  818.08   20.57
  -4   5   1  761.87   20.05
   4  -5  -1  777.77   16.23
  -4   5   1  765.53   16.22
  -4   5   1  792.64   14.63
  -4   5   0    2.48    2.16
   4  -5   0   -2.22    3.23
  -4   5   0    2.39    3.79
   4  -5   0    1.76    2.23
  -4   5   0   -2.12    2.24
  -4   5  -1 4470.69   68.48
   4  -5   1 4579.13   68.73
   4  -5   1 4499.74   65.13
  -4   5  -1 4490.39   64.95
  -4   5  -1 4497.05   63.17
  -4   5  -2  271.61   11.53
   4  -5   2  271.01   11.22
   4  -5   2  287.90   10.63
  -4   5  -2  280.90   10.50
  -4   5  -2  288.81    9.85
  -4   5  -3  574.17   17.38
   4   5   3  618.32   18.05
   4  -5   3  581.31   17.17
   4  -5   3  576.59   16.60
  -4   5  -3  606.60   16.75
  -4   5  -3  614.06   15.96
   4  -5   4    8.31    3.29
  -4   5  -4   13.83    3.39
   4   5   4    8.14    4.09
   4  -5   4   13.86    3.94
  -4   5  -4   14.22    3.63
   4  -5   5  207.29   10.33
   4   5   5  200.97   10.29
   4  -5   5  208.26   10.43
  -4   5  -5  228.20   10.25
  -4   5  -5  218.98   10.60
   4   5   6  191.09   10.18
   4  -5   6  206.21   10.37
   4  -5   6  200.91   10.85
  -4   5  -6  217.75   10.90
  -4   5  -6  226.79   10.74
   4  -5   7   71.02    6.93
   4   5   7   80.54    7.23
  -4   5  -7   88.17    7.35
   4  -5   7   76.69    7.11
   4  -5   8    3.12    3.46
   4   5   8    4.12    4.13
   4  -5   8   -0.55    3.95
   4  -5   9  230.69   12.88
   4   5   9  226.27   12.11
   4   5  10   98.62    8.82
   4  -5  10   98.14    9.18
   4  -5  11  730.82   24.81
   4   5  11  716.19   23.34
   4   5  12   18.43    5.54
   4  -5  12   10.45    5.03
   4  -5  13  295.99   16.55
   4   5  13  299.56   15.84
   4  -5  14   10.36    6.14
   4  -5  15   21.99    6.72
   4  -5  16   21.85    6.42
   4   5  16    7.87    5.32
   4   5  17  193.66   14.56
   4   5  18   14.13    6.94
  -4  -6  19  382.85   20.55
  -4  -6  18   -0.40    5.39
  -4  -6  17  238.08   15.62
  -4  -6  16  303.61   17.03
  -4  -6  15   34.03    7.13
  -4  -6  14  131.75   11.00
  -4  -6  13   84.40    9.16
  -4   6  13   65.14    3.43
  -4   6  12   67.63    8.48
  -4   6  12   60.30    3.01
  -4  -6  12   76.28    8.49
  -4   6  11  891.92   26.55
  -4  -6  11  856.16   25.24
  -4   6  10   29.72    6.50
  -4   6  10   17.28    1.56
  -4  -6  10   28.66    5.86
  -4   6  10   25.38    1.62
  -4   6   9  221.02   12.72
  -4   6   9  146.38    3.69
  -4   6   9  170.48    3.73
  -4   6   8  457.32   17.49
  -4   6   8  374.95    7.03
  -4   6   7  208.54   11.70
  -4   6   7  217.57    5.23
  -4   6   6  862.02   23.89
  -4   6   6  814.99   13.82
  -4   6   5  139.65    9.45
  -4   6   5  129.99    4.87
   4   6  -5  157.00    9.57
  -4   6   4   56.37    6.47
  -4   6   4   64.86    3.81
   4   6  -4   61.81    6.31
  -4   6   3  977.05   24.82
   4   6  -3 1014.30   25.54
  -4   6   3  996.49   18.81
  -4   6   3 1034.04   14.67
  -4   6   2  255.05   11.64
   4  -6  -2  269.64    8.73
   4   6  -2  277.75   12.37
  -4   6   2  275.09    6.89
  -4   6   2  251.05    8.49
   4  -6  -1 2972.90   50.32
  -4   6   1 2902.84   50.09
   4  -6  -1 2910.98   44.46
  -4   6   1 2904.56   41.61
  -4   6   1 2855.82   44.54
  -4   6   0  365.26   13.79
   4  -6   0  387.32   14.16
   4  -6   0  379.62   11.78
  -4   6   0  375.60   10.45
  -4   6   0  375.60   11.83
  -4   6  -1  496.08   16.30
   4  -6   1  527.82   16.71
   4  -6   1  491.02   14.46
  -4   6  -1  503.35   13.22
  -4   6  -1  502.56   14.63
  -4   6  -2   -1.81    2.49
   4  -6   2    2.47    3.37
  -4   6  -2   -2.63    3.97
   4  -6   2   -0.56    2.96
  -4   6  -2    6.91    3.19
  -4   6  -3  207.91   10.90
   4  -6   3  206.83   10.41
   4  -6   3  208.54    9.99
  -4   6  -3  212.64    9.99
  -4   6  -3  210.98    9.30
  -4   6  -4    5.14    2.85
   4   6   4   13.35    4.71
   4  -6   4    7.08    3.63
   4  -6   4    6.49    3.43
  -4   6  -4    6.37    3.27
   4   6   5  308.01   13.15
   4  -6   5  294.38   12.76
   4  -6   5  279.77   13.43
  -4   6  -5  317.12   13.30
  -4   6  -5  318.35   12.64
  -4   6  -6   36.62    5.54
   4   6   6   17.06    4.71
   4  -6   6   18.45    4.70
   4  -6   6   27.44    4.85
   4  -6   7  729.46   21.62
   4   6   7  705.90   21.43
   4  -6   7  726.76   22.56
   4  -6   8  250.81   12.50
   4  -6   8  257.55   13.62
   4   6   8  275.66   13.48
   4  -6   9  131.46   10.44
   4   6   9  130.19    9.54
   4   6  10   52.04    7.13
   4  -6  10   54.19    7.21
   4  -6  11  168.18   12.36
   4   6  11  136.17   10.24
   4   6  12    5.65    4.30
   4  -6  12    0.84    4.70
   4  -6  13  917.82   30.70
   4   6  13  885.26   27.81
   4  -6  14    6.38    5.42
   4  -6  15  572.23   25.22
   4  -6  16    7.01    6.47
   4   6  17   26.09    7.05
   4   6  18   29.21    6.64
  -4  -7  17   69.52    9.95
  -4  -7  16   13.27    5.66
  -4  -7  15  455.85   21.49
  -4   7  14   96.57   10.63
  -4  -7  14  112.03   11.01
  -4   7  13  123.49   11.31
  -4  -7  13  124.11   11.00
  -4   7  12  180.87   13.22
  -4  -7  12  185.59   12.74
  -4   7  11   40.62    7.19
  -4   7  11   26.58    2.27
  -4   7  11   33.07    2.26
  -4   7  10   33.81    6.72
  -4   7  10   32.02    2.32
  -4   7  10   33.36    2.26
  -4   7   9   -0.03    4.92
  -4   7   9    2.94    1.40
  -4   7   8  292.47   14.87
  -4   7   8  306.94    7.28
  -4   7   7   -0.16    4.41
  -4   7   7    9.78    1.95
  -4   7   6  108.75    9.05
  -4   7   6  102.21    4.75
  -4   7   5  854.24   24.60
  -4   7   5  890.43   17.09
  -4   7   4  123.93    9.06
  -4   7   4  110.32    5.36
  -4   7   3   14.14    4.53
   4   7  -3   16.52    2.16
  -4   7   3   15.86    1.73
  -4   7   3   10.90    1.86
  -4   7   2  473.74   16.87
  -4   7   2  462.64   13.02
  -4   7   2  485.93   10.58
  -4   7   1  312.26   13.34
   4  -7  -1  295.57   10.63
  -4   7   1  303.98    8.86
  -4   7   1  313.70   10.87
  -4   7   0  137.47    9.10
   4  -7   0  137.55    8.64
   4  -7   0  140.10    7.53
  -4   7   0  129.39    7.42
  -4   7   0  142.06    6.67
  -4   7  -1  431.99   15.93
   4  -7   1  445.40   16.01
   4  -7   1  447.27   14.39
  -4   7  -1  462.81   14.70
  -4   7  -2    3.92    3.74
   4  -7   2   -6.22    3.56
   4  -7   2    1.94    3.09
  -4   7  -2    1.56    2.92
  -4   7  -3  541.42   18.43
   4  -7   3  563.63   18.20
   4  -7   3  536.69   17.42
  -4   7  -3  556.19   17.59
   4   7   4   53.12    6.27
  -4   7  -4   52.54    6.59
   4  -7   4   52.52    5.97
   4  -7   4   50.37    6.05
  -4   7  -4   62.17    6.61
   4   7   5  830.11   23.27
   4  -7   5  792.38   22.98
   4  -7   5  813.24   22.85
   4   7   6  668.18   20.80
   4  -7   6  653.10   21.43
   4  -7   6  657.08   20.58
   4   7   7   32.64    5.87
   4  -7   7   34.38    6.12
   4  -7   8  669.13   23.06
   4   7   8  646.27   21.05
   4  -7   9  630.28   23.05
   4   7   9  617.06   21.00
   4   7  10    1.73    4.52
   4  -7  10   -1.85    4.67
   4  -7  11  381.94   18.96
   4   7  11  356.28   16.59
   4  -7  12  302.65   17.46
   4   7  12  252.64   14.24
   4   7  13    6.79    5.16
   4  -7  13   14.17    6.65
   4   7  14  118.32   11.08
   4  -7  14  114.34   12.03
   4  -7  15    4.64    5.87
  -4  -8  16   68.44    9.74
  -4   8  15   28.70    7.59
  -4  -8  15   41.68    8.03
  -4   8  14  252.79   16.93
  -4  -8  14  254.15   16.25
  -4   8  13   93.46   10.58
  -4   8  12  174.59   13.49
  -4   8  11  733.57   26.81
  -4   8  10  170.87   12.66
  -4   8   9  108.73   10.10
  -4   8   8  568.54   21.70
  -4   8   8  563.09   12.39
  -4   8   7    2.18    4.31
  -4   8   7    6.34    2.28
  -4   8   6  173.90   11.55
  -4   8   6  182.69    7.07
  -4   8   5   43.86    6.65
  -4   8   5   47.42    4.08
   4   8  -4  299.97    5.86
  -4   8   4  326.97   14.94
  -4   8   4  341.17   10.72
   4   8  -3  239.15    6.96
  -4   8   3  243.66   12.87
  -4   8   3  235.72    9.31
  -4   8   3  254.24    6.47
   4   8  -2  111.69    5.66
  -4   8   2  112.62    8.90
  -4   8   2  115.06    7.05
  -4   8   2  116.50    5.08
  -4   8   1  122.38    9.38
  -4   8   1  134.58    6.21
  -4   8   1  123.09    7.36
  -4   8   0  125.39    9.12
   4  -8   0  126.38    7.74
  -4   8   0  126.70    7.81
  -4   8  -1   42.79    5.85
   4  -8   1   50.25    5.47
  -4   8  -1   43.98    5.37
  -4   8  -2 1077.92   28.26
   4  -8   2 1101.56   26.71
  -4   8  -2 1146.68   27.19
  -4   8  -3  128.89    9.36
   4  -8   3  131.72    9.03
   4   8   4  186.91   11.11
  -4   8  -4  180.98   11.21
   4  -8   4  171.45   10.51
   4   8   5   61.70    7.22
   4  -8   5   51.98    7.12
   4   8   6   38.27    6.01
   4  -8   6   38.81    6.34
   4   8   7   -2.30    4.04
   4  -8   7    3.01    4.37
   4   8   8  110.56    9.02
   4  -8   8  107.78    9.86
   4   8   9   19.70    5.04
   4  -8   9   13.94    5.18
   4  -8  10  767.65   26.94
   4   8  10  761.02   24.38
   4   8  11    7.72    5.01
   4  -8  11   20.55    6.39
   4  -8  12  591.25   24.58
   4   8  12  532.40   21.48
   4   8  13   27.21    7.92
   4  -8  13   24.44    6.61
   4   8  14    9.13    5.65
  -4   9  14    6.18    5.49
  -4   9  13  121.80   12.59
  -4   9  12  576.85   24.95
  -4   9  11   14.25    5.92
  -4   9  10 1362.34   38.33
  -4   9   9  110.39   10.65
  -4   9   8  606.34   23.37
  -4   9   7   13.29    5.89
  -4   9   6   60.10    8.00
  -4   9   6   61.63    4.90
  -4   9   5    5.09    4.61
  -4   9   5   14.78    3.11
   4   9  -4  693.30   11.50
  -4   9   4  703.24   23.71
  -4   9   4  714.72   18.08
  -4   9   3   81.10    8.00
   4   9  -3   79.31    4.33
  -4   9   3   88.15    4.06
  -4   9   3   65.78    5.52
  -4   9   2  932.71   26.91
   4   9  -2  943.02   19.45
  -4   9   2  966.85   23.18
  -4   9   2  991.01   18.68
  -4   9   1   -1.66    4.16
   4   9  -1    1.33    3.02
  -4   9   1    2.88    3.30
  -4   9   0  173.54   11.18
  -4   9   0  190.78   10.02
  -4   9  -1  124.13   10.00
   4  -9   1  149.79    9.30
  -4   9  -1  139.91    9.24
   4  -9   2   22.93    5.09
  -4   9  -2   22.18    5.69
   4  -9   3   27.56    5.64
  -4   9  -3   15.19    4.83
   4   9   4  978.44   27.46
  -4   9  -4  954.01   27.40
   4  -9   4  961.58   27.11
   4   9   5   30.38    5.67
   4  -9   5   27.53    5.65
   4   9   6  899.64   26.25
   4  -9   6  910.92   27.85
   4   9   7    5.83    4.22
   4  -9   7    6.61    4.99
   4   9   8    5.22    4.60
   4  -9   8    6.58    6.05
   4   9   9   25.60    5.90
   4  -9   9   22.50    6.32
   4   9  10   -5.88    7.18
   4  -9  10   14.45    6.03
   4   9  11    1.73    4.63
   4  -9  11    5.45    5.19
   4   9  12    8.06    4.84
   4  -9  12    6.92    5.42
   4   9  13    7.62    4.88
  -4  10  12   97.45   11.46
  -4  10  11  182.82   14.55
  -4  10  10   -0.26    5.60
  -4  10   9  119.80   11.49
  -4  10   8  167.14   12.89
  -4  10   7  123.33   10.90
  -4  10   6  819.74   27.51
  -4  10   5   92.46    9.68
  -4  10   4  566.21   21.85
  -4  10   3   48.03    7.12
  -4  10   2   43.64    6.96
   4  10  -2   31.07    3.74
  -4  10   2   49.25    6.15
  -4  10   1   21.47    5.46
   4  10  -1   18.73    3.61
  -4  10   0  242.72   13.63
   4  10   0  255.88   10.81
   4  10   1   10.28    4.09
  -4  10  -1    9.62    5.14
  -4  10  -2  534.86   20.56
   4 -10   2  516.11   19.20
   4 -10   3   68.86    7.71
  -4  10  -3   80.27    8.57
  -4  10  -4  348.49   16.47
   4  10   4  341.24   16.11
   4 -10   4  328.39   16.06
   4  10   5    8.44    4.86
   4 -10   5   16.58    5.32
   4  10   6    5.79    4.47
   4 -10   6    8.25    5.70
   4  10   7  194.51   12.38
   4 -10   7  217.12   14.27
   4 -10   8  295.23   16.78
   4  10   8  276.43   14.61
   4  10   9    5.84    4.80
   4 -10   9    7.29    5.92
   4 -10  10  344.36   19.10
   4  10  10  313.92   16.24
   4  10  11   33.29    6.89
   4 -10  11   62.29   10.07
  -4  11  10  208.18   15.68
  -4  11   9    3.18    5.45
  -4  11   8   28.28    7.29
  -4  11   7   36.80    7.18
  -4  11   6    9.66    9.69
  -4  11   5  101.13   10.06
  -4  11   4    1.00    4.84
  -4  11   3   16.55    6.17
  -4  11   2  395.50   18.72
  -4  11   1   21.56    5.39
  -4  11   0  491.22   20.33
   4  11   1   74.30    7.23
  -4  11  -1   69.34    9.28
   4  11   2    0.30    4.01
  -4  11  -2   -1.36    4.72
   4  11   3  119.62    9.17
  -4  11  -3  119.28   11.78
  -4  11  -4  236.12   14.75
   4  11   4  261.37   14.67
   4 -11   4  254.47   14.75
   4  11   5   -2.34    4.54
   4 -11   5    1.71    4.71
   4  11   6  406.14   18.25
   4 -11   6  405.13   19.70
   4  11   7   15.86    6.04
   4 -11   7   11.52    6.15
   4 -11   8  368.82   19.60
   4  11   8  372.54   17.59
   4 -11   9   28.38    7.84
  -4  12   8  209.89   15.38
  -4  12   7   27.27    6.56
  -4  12   6  201.16   14.69
  -4  12   5   24.42    6.38
  -4  12   4   43.94    7.74
  -4  12   3  347.49   18.61
  -4  12   2   -8.29    6.67
  -4  12   1  163.04   12.46
  -4  12   0  124.50   10.84
  -4  12  -1  142.33   12.22
  -4  12  -2  159.58   12.21
   4  12   3   12.87    5.66
  -4  12  -3    8.80    5.45
   4  12   4   92.85    9.87
   4  12   5  242.58   14.22
   4 -12   6    2.33    5.79
   4 -12   7  495.32   23.31
  -4  13   5  172.06   14.10
  -4  13   4  238.62   16.66
  -4  13   3   83.99   10.29
  -4  13   2   22.32    4.96
  -4  13   1    6.31    5.38
  -4  13   0   38.67    8.16
  -4  13  -1  209.65   14.28
  -5   0  20 1118.63   30.22
  -5   0  19   -2.56    3.79
  -5   0  18  359.79   15.05
  -5   0  17    1.61    3.85
  -5   0  16   13.11    4.31
  -5   0  15   -0.93    3.15
   5   0 -15    0.67    2.79
  -5   0  14  106.10    7.11
   5   0 -14  117.19    7.35
  -5   0  13    4.86    2.78
   5   0 -13    3.02    2.69
  -5   0  12 1117.07   23.40
   5   0 -12 1139.29   23.77
  -5   0  11   -2.49    2.92
  -5   0  11   -2.26    2.43
   5   0 -11    1.32    2.05
  -5   0  10 2148.57   37.58
  -5   0  10 2149.13   34.83
   5   0 -10 2112.77   34.80
  -5   0   9    1.98    2.94
   5   0  -9   -1.53    1.98
   5   0  -8   11.50    2.37
  -5   0   8   12.47    3.43
   5   0  -7    0.19    1.96
  -5   0   7   -5.86    3.27
   5   0  -6 2136.66   32.58
  -5   0   6 2179.80   34.97
   5   0  -5   -1.74    1.84
   5   0  -5   -1.54    2.52
  -5   0   5    3.98    2.99
   5   0  -4 4385.48   61.84
  -5   0   4 4355.97   61.51
  -5   0   3   -3.70    3.28
   5   0  -3    0.37    2.54
   5   0  -2 1150.90   22.16
  -5   0   2 1210.65   22.80
  -5   0   1    6.04    3.52
   5   0  -1    2.06    2.68
   5   0  -1   -2.93    3.46
   5   0   0  918.49   19.92
   5   0   0  951.87   20.05
   5   0   1    0.90    3.13
   5   0   1    5.56    3.73
   5   0   2  656.00   16.76
  -5   0  -2  647.92   16.89
   5   0   2  619.55   16.37
  -5   0  -3    0.34    3.12
   5   0   3   -2.94    3.59
  -5   0  -4 2772.05   45.94
   5   0   4 2672.01   45.33
   5   0   5   -1.25    3.52
  -5   0  -5    2.17    3.20
  -5   0  -6 1062.82   25.14
   5   0   6 1052.45   25.24
   5   0   7    1.87    4.16
  -5   0  -7   -0.24    3.22
   5   0   8   15.86    4.76
  -5   0  -8   24.93    5.09
   5   0   9   -2.42    3.89
   5   0  10    6.25    4.49
   5   0  11   -0.87    4.57
   5   0  12  384.05   17.72
   5   0  13    1.42    4.67
   5   0  14 1212.24   34.73
   5   0  15    3.83    4.93
   5   0  16  233.17   15.88
   5   0  17   -6.92    6.14
   5   0  18   87.68   10.57
  -5  -1  21   27.25    6.08
  -5  -1  20    0.10    4.34
  -5  -1  19   73.09    8.15
  -5   1  19   81.10    7.66
  -5   1  18  242.51   11.69
  -5  -1  18  232.77   13.08
  -5  -1  17   72.09    7.21
  -5   1  17   76.56    6.85
  -5  -1  16  980.18   25.76
  -5   1  16  991.64   23.54
  -5  -1  15   25.85    5.28
  -5   1  15   28.79    4.38
   5   1 -15   12.61    3.51
  -5  -1  14 1014.35   24.65
  -5   1  14 1014.69   22.14
   5   1 -14 1010.16   24.81
  -5  -1  13  751.66   19.93
  -5   1  13  736.96   17.40
   5   1 -13  724.39   19.72
  -5  -1  12   45.49    4.83
  -5  -1  12   62.39    5.61
  -5   1  12   49.27    4.18
   5  -1 -12   56.68    4.31
   5   1 -12   52.49    6.66
  -5  -1  11  103.37    6.48
  -5   1  11  112.75    7.71
   5   1 -11  107.87    6.71
  -5  -1  11  113.46    6.94
  -5   1  11  107.26    5.48
   5  -1 -11  108.78    5.56
  -5  -1  10   54.59    4.85
  -5   1  10   50.50    5.56
  -5  -1  10   50.11    4.72
  -5   1  10   56.87    3.88
   5  -1 -10   43.39    3.50
   5   1 -10   43.52    4.40
  -5  -1   9  174.84    7.49
  -5   1   9  175.35    8.84
   5   1  -9  184.19    8.05
   5  -1  -9  173.87    6.19
   5  -1  -8 1793.31   27.22
   5   1  -8 1776.62   30.96
  -5   1   8 1833.79   33.19
  -5  -1   8 1825.36   30.29
   5   1  -7  119.10    6.08
   5  -1  -7  114.38    4.48
  -5   1   7  118.61    7.07
  -5  -1   7  128.70    5.93
   5  -1  -6 1197.28   19.10
   5   1  -6 1229.55   22.71
  -5  -1   6 1245.27   21.83
  -5   1   6 1245.47   24.44
  -5  -1   5  365.27    9.88
   5   1  -5  369.30   10.53
   5  -1  -5  348.45    8.00
   5  -1  -5  355.81   11.40
   5   1  -5  354.33    9.88
  -5   1   5  364.02   11.49
   5  -1  -4  458.68   12.92
  -5   1   4  452.28   12.86
   5   1  -4  438.87   11.16
  -5  -1   4  457.53   11.36
   5   1  -3  624.17   13.91
   5  -1  -3  640.00   15.63
  -5   1   3  629.37   15.61
  -5  -1   3  655.52   14.36
   5  -1  -2  691.38   16.46
  -5   1   2  708.62   16.67
   5  -1  -2  671.43   15.18
   5   1  -2  665.11   14.80
   5  -1  -1  130.83    6.86
  -5   1   1  131.89    7.37
   5   1  -1  137.32    6.46
   5  -1  -1  121.59    6.30
   5   1   0 2571.16   40.02
   5  -1   0 2490.00   39.35
  -5   1   0 2553.27   41.42
   5  -1   0 2431.02   40.71
   5   1   0 2605.63   41.84
   5   1   1  710.91   17.77
   5  -1   1  727.32   17.72
  -5   1  -1  688.66   16.76
   5  -1   1  686.32   16.39
   5  -1   2  307.18   11.28
   5   1   2  293.24   11.29
  -5   1  -2  288.35   10.59
   5  -1   2  315.40   10.89
   5  -1   3   48.74    5.23
   5  -1   3   45.61    5.21
   5   1   3   40.73    5.30
  -5   1  -3   49.09    4.93
   5  -1   4   21.45    4.25
   5  -1   4    5.05    3.63
  -5  -1  -4   17.06    3.89
   5   1   4   21.12    5.05
  -5   1  -4   13.75    3.46
  -5   1  -5  130.16    8.00
  -5  -1  -5  138.89    8.42
   5  -1   5  132.89    8.04
   5   1   5  134.59    8.34
   5   1   6   97.82    7.39
  -5  -1  -6  109.18    7.62
   5  -1   6  109.37    7.91
   5  -1   6   92.37    7.40
  -5   1  -6   92.35    7.28
   5   1   7    9.96    4.59
  -5   1  -7   21.10    4.47
  -5  -1  -7    9.57    3.94
   5  -1   7    7.60    4.08
  -5  -1  -8 1729.16   36.20
   5  -1   8 1658.95   36.19
   5   1   8 1704.29   36.15
  -5   1  -8 1709.96   35.91
   5  -1   9  351.56   15.25
   5   1   9  364.90   15.48
   5  -1  10 1269.78   32.09
   5   1  10 1286.31   31.96
   5   1  11   -1.13    4.33
   5  -1  11   -4.08    4.41
   5   1  12   23.59    6.40
   5  -1  12   24.63    5.58
   5   1  13   79.33    9.04
   5  -1  13   82.20    9.18
   5   1  14  265.82   15.52
   5  -1  14  269.46   15.68
   5  -1  15   30.25    6.99
   5   1  15   18.44    6.18
   5   1  16  310.94   17.84
   5  -1  16  334.19   18.65
   5  -1  17   90.83   10.80
   5   1  17   73.31   10.29
   5  -1  18  417.89   22.52
   5   1  18  428.33   22.45
  -5  -2  22  150.31   12.45
  -5  -2  21   56.12    7.78
  -5  -2  20  176.26   12.58
  -5  -2  19   84.35    9.14
  -5  -2  18   57.14    7.10
  -5   2  18   67.38    6.11
  -5   2  17  406.66   13.96
  -5  -2  17  416.10   17.12
  -5  -2  16   12.15    4.30
  -5   2  16   21.67    3.95
  -5  -2  15   64.56    6.72
  -5   2  15   65.91    5.18
  -5  -2  14  101.16    8.07
  -5   2  14  102.48    5.97
   5   2 -14   90.84    7.64
  -5  -2  13   93.21    7.39
   5   2 -13   97.36    7.58
  -5   2  13  106.82    5.61
  -5  -2  12  499.55   13.87
  -5  -2  12  489.48   16.01
  -5   2  12  489.67   11.69
   5   2 -12  496.20   16.28
  -5   2  11   31.38    5.27
  -5  -2  11   33.04    3.75
  -5  -2  11   37.21    5.03
  -5   2  11   28.79    2.88
   5   2 -11   28.81    4.41
  -5  -2  10  505.18   12.88
  -5   2  10  514.02   16.81
   5   2 -10  520.74   15.58
  -5  -2  10  503.20   15.36
  -5   2   9  282.12   12.00
  -5  -2   9  284.74    8.79
   5   2  -9  290.32   10.96
  -5   2   8   13.46    4.01
  -5  -2   8    9.88    2.11
   5   2  -8   12.51    2.96
  -5   2   7 2142.71   37.66
  -5  -2   7 2162.11   31.53
   5   2  -7 2133.75   36.10
   5  -2  -7 2048.79   27.12
   5   2  -6   34.43    4.12
  -5   2   6   34.78    4.76
  -5  -2   6   40.29    3.17
  -5  -2   5   89.35    4.40
   5   2  -5   85.30    5.61
   5  -2  -5   75.66    2.51
   5   2  -5   85.95    4.28
   5  -2  -5   94.75    6.42
  -5   2   5   89.19    6.39
   5  -2  -4 1291.02   25.60
  -5   2   4 1256.90   25.28
   5   2  -4 1221.38   20.75
  -5   2   3  186.89    8.73
   5  -2  -3  190.18    8.59
   5   2  -3  185.63    6.55
   5  -2  -3  172.90    6.29
   5  -2  -2 2821.54   44.75
   5  -2  -2 2678.39   39.94
  -5   2   2 2803.10   44.61
   5   2  -2 2774.88   40.56
   5   2  -1   65.59    4.60
   5  -2  -1   63.72    5.30
  -5   2   1   50.75    5.36
   5  -2  -1   60.17    4.25
   5  -2   0  734.25   18.29
  -5   2   0  765.14   18.83
  -5   2   0  744.07   16.53
   5  -2   0  755.55   16.21
  -5   2  -1  687.04   17.91
  -5   2  -1  663.54   15.76
   5  -2   1  686.52   17.55
   5   2   1  673.60   18.04
   5  -2   1  675.75   15.74
   5  -2   1  688.27   15.95
  -5   2  -2  469.40   13.26
   5   2   2  467.76   14.81
   5  -2   2  439.42   14.12
   5  -2   2  482.07   13.44
   5  -2   2  469.22   13.25
   5  -2   3  101.34    7.07
   5   2   3   90.86    6.97
  -5   2  -3  101.69    6.41
   5  -2   3   89.00    6.32
   5  -2   3   98.28    6.57
   5   2   4  308.76   12.34
   5  -2   4  295.99   12.07
  -5   2  -4  291.56   11.24
   5  -2   4  305.52   11.51
   5  -2   4  292.33   11.47
   5  -2   5  110.29    7.76
  -5   2  -5  117.99    7.56
   5   2   5  112.42    8.09
   5  -2   5  102.80    7.51
  -5  -2  -6 1968.90   38.23
   5  -2   6 1883.01   37.53
   5   2   6 1824.13   36.89
   5  -2   6 1859.73   37.02
  -5   2  -6 1971.46   37.04
  -5  -2  -7  337.69   14.15
   5  -2   7  285.23   12.94
  -5   2  -7  330.18   13.33
   5   2   7  309.26   13.38
  -5  -2  -8  328.01   14.23
   5  -2   8  308.85   13.88
   5   2   8  303.30   13.78
   5  -2   9  545.33   19.18
   5   2   9  506.87   18.50
   5   2  10  509.40   19.07
   5  -2  10  502.13   19.16
   5   2  11   84.82    8.77
   5  -2  11   82.79    8.49
   5  -2  12  933.22   28.74
   5   2  13   -4.60    5.09
   5  -2  13    0.81    4.92
   5  -2  14  201.56   13.86
   5   2  14  207.18   14.09
   5   2  15  231.89   15.41
   5  -2  15  245.30   15.94
   5  -2  16    7.14    6.46
   5   2  16    4.64    5.21
   5  -2  17  232.87   16.13
   5   2  17  237.75   16.12
   5   2  18   59.37    8.92
  -5  -3  22  350.30   19.01
  -5  -3  21  204.61   14.57
  -5  -3  20   -3.65    5.81
  -5  -3  19  128.53   10.97
  -5  -3  18  284.77   15.47
  -5   3  17   85.91    5.99
  -5  -3  17   92.12    9.19
  -5  -3  16   26.48    5.64
  -5   3  16   25.87    3.70
   5  -3 -15    9.11    2.98
  -5  -3  15   14.96    4.88
  -5   3  15    8.08    2.74
  -5  -3  14  123.36    6.91
  -5  -3  14  131.92    9.39
  -5   3  14  122.28    5.71
   5  -3 -14  106.32    7.07
  -5  -3  13   54.19    6.28
  -5   3  13   52.39    3.61
  -5  -3  13   54.08    4.47
   5   3 -12  253.25   12.11
  -5  -3  12  262.46   12.29
  -5   3  12  257.57    6.80
  -5  -3  12  255.35    8.77
  -5   3  12  257.61   13.22
   5   3 -11  524.87   17.02
  -5  -3  11  538.25   17.40
  -5  -3  11  522.76   12.47
  -5   3  11  500.97   17.88
  -5  -3  10  359.66   13.53
   5   3 -10  366.46   13.90
  -5   3  10  357.29   14.60
  -5  -3  10  362.70    9.31
   5   3  -9  488.31   15.70
  -5  -3   9  486.31   10.53
  -5   3   9  488.54   16.69
  -5  -3   8 1616.71   24.13
   5   3  -8 1606.67   31.79
  -5   3   8 1561.67   32.84
  -5  -3   7  143.22    4.61
   5   3  -7  155.85    8.40
  -5   3   7  132.38    8.47
   5   3  -6    1.91    2.84
  -5   3   6    1.50    3.88
   5  -3  -5  805.94   13.10
   5   3  -5  792.49   19.40
   5   3  -5  791.38   13.62
  -5   3   5  781.01   20.02
   5  -3  -4    1.21    1.48
   5  -3  -4    8.16    3.67
  -5   3   4   -1.18    3.70
   5   3  -4    4.94    1.97
   5  -3  -4    0.44    0.91
   5   3  -4   -1.01    2.72
   5   3  -3 1028.53   18.12
  -5   3   3 1103.93   23.87
   5  -3  -3 1143.19   24.45
   5  -3  -3 1078.92   16.89
   5  -3  -3 1085.82   17.61
  -5   3   2   26.23    4.69
   5  -3  -2   30.46    4.50
   5   3  -2   22.15    2.90
   5  -3  -2   26.07    2.82
   5  -3  -2   25.67    2.58
   5  -3  -1 1195.85   25.28
  -5   3   1 1143.02   20.88
  -5   3   1 1206.90   25.37
   5  -3  -1 1163.11   20.47
   5  -3  -1 1169.21   20.63
   5  -3   0  178.37    8.94
  -5   3   0  181.94    7.19
  -5   3   0  196.76    9.61
   5  -3   0  178.19    7.11
   5  -3   0  183.37    6.98
  -5   3  -1   31.58    5.33
   5  -3   1   37.06    5.01
  -5   3  -1   30.20    3.84
   5  -3   1   31.71    3.83
   5   3   2  704.06   19.26
   5  -3   2  688.25   18.64
  -5   3  -2  696.48   16.62
   5  -3   2  698.71   17.10
   5   3   3  579.33   17.41
   5  -3   3  595.78   17.45
  -5   3  -3  601.76   15.94
   5  -3   3  601.53   16.36
   5  -3   4   44.75    5.63
  -5   3  -4   50.49    5.07
   5   3   4   51.58    5.54
   5  -3   4   46.50    5.17
   5  -3   5 2518.65   45.29
   5   3   5 2389.07   44.32
   5  -3   5 2407.30   43.84
  -5   3  -5 2551.21   43.45
   5  -3   6 1512.35   32.88
   5   3   6 1445.15   32.07
  -5   3  -6 1570.61   31.92
   5  -3   6 1489.32   32.31
   5  -3   7  660.42   20.40
   5  -3   7  635.04   20.01
  -5   3  -7  670.54   19.76
   5   3   7  618.76   19.58
   5  -3   8  309.43   14.15
   5   3   8  302.22   13.88
   5   3   9    2.81    4.29
   5  -3   9   -0.33    3.96
   5   3  10   20.03    5.58
   5  -3  10   31.28    5.69
   5  -3  11  787.66   25.64
   5   3  11  822.65   25.80
   5   3  12  398.36   18.17
   5  -3  12  407.08   18.62
   5  -3  13  654.74   24.62
   5  -3  14   16.31    5.97
   5   3  14   14.76    5.85
   5  -3  15  234.86   15.69
   5   3  15  208.34   14.58
   5   3  16  138.68   12.52
   5  -3  16  128.03   12.05
   5   3  17   28.18    7.42
   5  -3  17   34.81    8.00
   5   3  18  183.79   15.23
  -5  -4  21   36.12    7.78
  -5  -4  20  144.28   12.50
  -5  -4  19   43.60    7.46
  -5  -4  18  211.40   13.93
  -5  -4  17  568.97   22.16
  -5  -4  16   69.55    5.18
  -5  -4  16   68.25    7.89
  -5  -4  15 1077.46   21.03
  -5  -4  15 1031.72   29.08
  -5   4  15  901.02   17.79
  -5  -4  14  273.76    8.90
  -5  -4  14  272.26   14.02
  -5   4  14  240.23    6.86
   5  -4 -14  270.65    9.61
  -5  -4  13  677.03   13.95
  -5   4  13  653.65   22.47
  -5  -4  13  670.95   21.68
   5  -4 -13  660.67   14.74
  -5   4  12  230.52   12.97
  -5  -4  12  241.39    7.32
  -5  -4  12  251.92   12.72
   5  -4 -12  250.46    7.93
  -5   4  11  550.15   19.63
  -5  -4  11  579.70   11.04
  -5  -4  11  553.67   18.74
   5  -4 -11  552.30   11.70
  -5  -4  10  225.16    5.33
  -5   4  10  198.55   11.62
   5   4 -10  225.49   11.56
   5  -4 -10  213.01    5.83
  -5   4   9  872.45   24.20
   5   4  -9  892.24   23.42
   5  -4  -9  886.37   13.45
   5   4  -8   31.08    4.84
  -5   4   8   18.84    4.73
   5   4  -7  449.19   15.31
  -5   4   7  419.62   15.40
   5   4  -6  425.16   14.70
  -5   4   6  421.99   15.04
   5   4  -5  473.82   15.26
  -5   4   5  439.43   15.26
   5   4  -4   39.06    4.86
   5  -4  -4   33.10    1.75
   5   4  -4   32.15    2.25
   5  -4  -4   36.05    4.70
  -5   4   4   37.16    5.28
   5   4  -3  168.57    5.48
   5  -4  -3  165.85    5.05
  -5   4   3  167.87    9.13
   5  -4  -3  181.77    9.38
   5  -4  -2   47.41    3.33
  -5   4   2   55.17    5.94
   5  -4  -2   49.61    5.30
  -5   4   1 3560.36   57.93
  -5   4   1 3612.84   50.79
   5  -4  -1 3792.29   58.72
   5  -4  -1 3644.78   51.43
   5  -4   0    8.94    3.42
  -5   4   0    4.27    3.76
  -5   4   0   -0.62    2.26
   5  -4   0    4.10    2.64
  -5   4  -1 1063.04   25.06
   5  -4   1 1081.86   24.90
   5  -4   1 1052.01   21.65
  -5   4  -1 1054.33   21.05
  -5   4  -2   70.83    6.80
   5  -4   2   58.89    5.56
  -5   4  -2   63.97    4.99
   5  -4   2   63.53    5.43
   5  -4   3  112.64    7.77
   5   4   3  119.38    8.43
   5  -4   3  119.18    7.42
  -5   4  -3  112.41    6.80
   5  -4   4   23.86    4.54
  -5   4  -4   29.32    4.43
   5   4   4   33.09    5.13
   5  -4   4   23.15    4.41
   5  -4   5    3.78    3.12
  -5   4  -5    4.44    3.53
   5   4   5    2.84    4.10
   5  -4   5    1.99    3.49
   5  -4   6   45.06    5.77
   5   4   6   51.99    6.30
  -5   4  -6   56.35    5.83
   5  -4   6   51.31    5.93
   5  -4   7  365.93   15.15
   5  -4   7  372.44   15.18
  -5   4  -7  378.86   14.70
   5   4   7  346.19   14.68
   5   4   8   27.27    5.46
   5  -4   8   32.90    5.93
   5  -4   9 1010.69   28.07
   5   4   9  976.12   26.99
   5   4  10   22.68    4.91
   5  -4  10   23.02    6.39
   5  -4  11  242.22   14.26
   5   4  11  253.71   14.00
   5   4  12    5.43    4.50
   5  -4  12    8.91    5.48
   5   4  13   16.32    5.74
   5  -4  13   26.49    6.65
   5  -4  14   14.95    5.57
   5  -4  15  228.40   15.61
   5   4  16   44.94    8.28
   5  -4  16   42.03    7.80
   5   4  17  210.25   15.48
  -5  -5  20   -7.08    6.12
  -5  -5  19  485.47   22.26
  -5  -5  18  102.00   10.45
  -5  -5  17  240.77   14.95
  -5  -5  16   -4.40    4.99
  -5  -5  15  131.65   11.15
  -5   5  15  136.58   11.85
  -5  -5  14   -2.71    4.37
  -5   5  14   -6.28    5.25
  -5  -5  14    2.80    1.70
   5  -5 -13 1262.05   19.73
  -5  -5  13 1230.13   32.04
  -5   5  13 1302.18   34.01
   5  -5 -12   10.30    1.61
  -5  -5  12    7.59    3.92
  -5   5  12    5.63    4.57
  -5   5  11  799.14   25.19
  -5   5  10   85.86    8.42
  -5   5   9  936.77   26.29
  -5   5   8  135.10    9.51
   5   5  -7  231.80   11.69
  -5   5   7  249.49   12.49
   5   5  -6   66.84    6.42
  -5   5   6   53.89    6.38
   5   5  -5 2006.44   38.95
  -5   5   5 1928.11   38.68
   5   5  -4  187.39    4.26
   5   5  -4  210.77   10.66
  -5   5   4  207.50   10.64
   5   5  -3 1492.73   22.84
   5   5  -3 1540.61   32.30
   5  -5  -3 1503.57   23.51
   5  -5  -3 1580.06   32.63
  -5   5   3 1502.64   31.94
  -5   5   2  378.10    8.90
   5  -5  -2  418.38   14.95
  -5   5   2  410.80   14.75
   5  -5  -2  389.56   10.08
  -5   5   1  416.80   15.12
   5  -5  -1  440.24   15.31
   5  -5  -1  410.61   11.23
  -5   5   1  426.64   10.44
   5  -5   0   86.93    6.85
  -5   5   0   91.61    7.35
   5  -5   0   79.97    5.28
  -5   5   0   83.00    4.96
  -5   5  -1  331.09   13.49
   5  -5   1  332.43   13.18
   5  -5   1  321.56   11.02
  -5   5  -1  316.23   10.30
  -5   5  -2    4.67    4.34
   5  -5   2   -0.99    3.19
  -5   5  -2    3.94    2.48
   5  -5   2    3.66    3.19
   5   5   3  370.95   14.65
  -5   5  -3  384.37   14.85
   5  -5   3  376.75   14.38
   5  -5   3  360.12   13.12
  -5   5  -3  394.74   12.88
   5  -5   4   17.38    4.32
  -5   5  -4   20.42    4.08
   5   5   4   19.59    4.94
   5  -5   4   19.39    4.28
   5   5   5  809.87   22.76
   5  -5   5  814.90   22.74
   5  -5   5  776.03   21.91
  -5   5  -5  852.60   21.81
   5  -5   6   18.36    4.73
  -5   5  -6   21.32    4.20
   5   5   6   14.58    4.34
   5  -5   6   12.17    4.32
   5  -5   7  152.35    9.88
   5   5   7  142.02    9.81
   5   5   8   -1.87    4.07
   5  -5   8   -0.70    4.33
   5   5   9    1.61    4.66
   5  -5   9    5.31    4.52
   5  -5  10  150.79   11.07
   5   5  10  149.14   10.67
   5  -5  11  483.02   20.37
   5   5  11  425.56   18.57
   5   5  12   20.89    6.13
   5  -5  12   13.30    5.17
   5  -5  13  373.49   18.96
   5   5  13  357.73   17.80
   5  -5  14   34.56    7.67
   5  -5  15  311.94   18.28
   5  -5  16   13.43    6.22
   5   5  17    0.47    5.30
  -5  -6  19   60.81    9.61
  -5   6  18  177.69   14.95
  -5  -6  18  177.93   13.92
  -5   6  17  472.01   23.17
  -5  -6  17  462.94   21.67
  -5   6  16   31.91    7.41
  -5  -6  16   31.63    6.67
  -5   6  15  188.13   14.01
  -5  -6  15  197.11   13.90
  -5   6  14  413.94   19.90
  -5  -6  14  414.90   19.00
  -5   6  13   57.06    8.26
  -5  -6  13   54.99    7.66
  -5   6  12  242.87   14.33
  -5   6  11   33.85    6.72
  -5   6  10   17.03    5.60
  -5   6   9  152.83   10.78
  -5   6   8    5.40    4.67
  -5   6   7  845.51   24.79
  -5   6   6   88.88    8.23
  -5   6   5   29.02    5.37
  -5   6   4  652.47   20.65
  -5   6   4  691.08   13.20
  -5   6   3    1.91    4.14
   5  -6  -3    4.21    1.79
  -5   6   3   10.76    2.42
  -5   6   2   17.30    2.29
   5  -6  -2   10.10    4.09
  -5   6   2   15.35    4.66
   5  -6  -2   19.99    2.83
  -5   6   2   23.76    3.17
  -5   6   1  978.55   25.57
   5  -6  -1 1066.98   26.47
   5  -6  -1 1027.64   20.91
  -5   6   1 1017.76   18.71
  -5   6   1  999.38   20.65
  -5   6   0  422.11   15.86
   5  -6   0  455.02   16.36
   5  -6   0  448.09   13.18
  -5   6   0  430.00   13.03
  -5   6   0  454.63   11.98
  -5   6  -1 2321.23   44.65
   5  -6   1 2452.04   45.22
   5  -6   1 2356.20   40.47
  -5   6  -1 2356.10   38.44
  -5   6  -1 2344.87   40.44
  -5   6  -2  194.76   10.93
   5  -6   2  202.51   10.75
   5  -6   2  202.53    9.77
  -5   6  -2  191.78    9.39
  -5   6  -2  196.66    8.80
  -5   6  -3 1220.25   29.87
   5   6   3 1250.41   30.04
   5  -6   3 1249.93   29.50
   5  -6   3 1235.93   27.78
  -5   6  -3 1265.35   27.97
  -5   6  -3 1252.41   26.47
   5   6   4  149.88    9.81
   5  -6   4  147.14    9.38
   5  -6   4  153.79    9.55
  -5   6  -4  145.47    8.52
  -5   6  -4  146.15    9.24
   5   6   5    1.62    4.00
  -5   6  -5   -0.38    3.12
   5  -6   5    0.07    3.83
  -5   6  -5    6.95    3.86
   5   6   6   -0.13    4.07
   5  -6   6   -1.28    3.89
   5   6   7  620.79   20.80
   5  -6   7  623.18   21.24
   5  -6   8  302.55   14.87
   5   6   8  287.79   14.26
   5  -6   9  764.16   25.22
   5   6   9  745.72   23.96
   5   6  10   11.27    5.24
   5  -6  10   10.08    5.33
   5  -6  11  392.37   18.77
   5   6  11  348.26   16.98
   5   6  12   31.21    6.95
   5  -6  12   26.18    6.12
   5   6  13    1.58    4.97
   5  -6  13   16.17    5.75
   5   6  14   -3.68    5.49
   5  -6  14    3.74    5.64
   5  -6  15  374.14   21.15
   5   6  17  388.77   21.25
  -5   7  17   52.38    9.09
  -5  -7  17   37.35    7.76
  -5   7  16   70.01    9.89
  -5  -7  16   60.54    8.57
  -5   7  15   91.93   11.05
  -5   7  14    3.85    5.29
  -5   7  13  751.48   27.58
  -5   7  12  100.17   10.33
  -5   7  11  176.56   13.97
  -5   7  10   66.10    8.11
  -5   7   9   -2.57    4.49
  -5   7   8  280.39   14.84
  -5   7   7    4.51    4.45
  -5   7   6  332.76   15.56
  -5   7   6  335.49    7.27
  -5   7   5    6.84    4.59
  -5   7   5    3.58    1.58
  -5   7   4  140.40   10.04
  -5   7   4  126.68    5.28
  -5   7   3 1336.79   32.31
  -5   7   3 1361.57   19.36
  -5   7   3 1393.23   24.68
  -5   7   2   43.57    3.07
  -5   7   2   51.22    6.68
   5  -7  -2   48.19    4.32
  -5   7   2   37.65    3.99
  -5   7   1  600.32   20.04
   5  -7  -1  641.99   16.19
  -5   7   1  615.96   16.15
  -5   7   1  622.88   13.73
  -5   7   0  539.77   18.91
   5  -7   0  553.64   15.80
  -5   7   0  569.20   16.07
  -5   7   0  566.71   14.08
  -5   7  -1  251.49   12.77
   5  -7   1  274.72   11.27
  -5   7  -1  250.85   11.01
  -5   7  -1  278.77   10.11
  -5   7  -2  534.97   19.08
   5  -7   2  562.92   17.35
  -5   7  -2  572.09   17.41
  -5   7  -2  563.16   15.94
  -5   7  -3   73.75    6.40
  -5   7  -3   64.68    7.34
   5  -7   3   72.28    6.86
  -5   7  -3   73.60    6.63
  -5   7  -4   -1.10    3.32
   5   7   4    3.28    4.18
   5  -7   4   -0.09    3.74
   5   7   5  663.52   21.68
   5  -7   5  658.57   21.24
  -5   7  -5  695.73   20.48
   5   7   6  210.54   12.50
   5  -7   6  201.61   12.18
   5   7   7  163.87   11.06
   5  -7   7  178.66   11.61
   5  -7   8  276.97   15.02
   5   7   8  263.61   14.17
   5   7   9   33.42    6.11
   5  -7   9   29.40    5.69
   5  -7  10  746.20   26.27
   5   7  10  666.00   23.60
   5  -7  11  547.10   23.05
   5   7  11  505.80   20.79
   5   7  12   49.40    7.94
   5  -7  12   47.76    8.14
   5   7  13  122.43   11.38
   5  -7  13  139.28   12.75
   5  -7  14  170.39   13.96
   5   7  14  157.02   13.10
  -5   8  15  385.84   21.46
  -5   8  14   30.45    7.25
  -5   8  13   23.67    6.70
  -5   8  12  238.09   15.88
  -5   8  11   98.98   10.15
  -5   8  10  521.91   22.26
  -5   8   9  168.95   12.40
  -5   8   8    5.38    4.99
  -5   8   7   90.76    8.95
  -5   8   7  109.60    4.16
  -5   8   6  219.10   13.25
  -5   8   6  206.48    6.58
  -5   8   5    4.08    4.28
  -5   8   5   -3.67    2.45
  -5   8   4  417.90   17.85
  -5   8   4  453.50   12.23
  -5   8   3   24.99    5.67
   5   8  -3   28.76    2.80
  -5   8   3   33.60    2.00
  -5   8   3   33.75    4.12
  -5   8   2  306.52   14.62
  -5   8   2  359.60    8.96
  -5   8   2  350.15   12.08
  -5   8   1  460.14   18.17
   5  -8  -1  490.18   14.82
  -5   8   1  479.15   12.16
  -5   8   1  489.06   14.93
  -5   8   0  301.67   14.60
   5  -8   0  302.43   11.92
  -5   8   0  302.09   11.97
  -5   8   0  307.62   10.42
  -5   8  -1    4.40    2.90
  -5   8  -1    1.10    4.31
   5  -8   1    2.32    3.42
  -5   8  -1    1.76    3.22
  -5   8  -2  115.30    9.56
   5  -8   2  115.99    8.32
  -5   8  -2  133.99    8.85
  -5   8  -2  127.94    7.78
  -5   8  -3   12.47    3.91
  -5   8  -3    4.70    4.23
   5  -8   3    3.50    3.57
   5   8   4 1360.55   33.99
   5  -8   4 1351.06   32.52
  -5   8  -4 1386.72   30.71
   5   8   5   72.91    7.99
   5  -8   5   80.34    8.11
   5   8   6  650.77   22.27
   5  -8   6  644.08   22.28
   5   8   7   86.94    8.72
   5  -8   7   93.85    8.95
   5   8   8   65.54    8.25
   5  -8   8   68.45    8.26
   5   8   9   86.68    8.92
   5  -8   9   96.70   10.49
   5  -8  10  153.12   12.65
   5   8  10  137.66   11.29
   5   8  11   -2.51    4.70
   5  -8  11   11.47    6.15
   5   8  12  137.21   11.65
   5  -8  12  147.11   12.81
   5   8  13   29.98    7.21
   5  -8  13   26.40    6.81
   5   8  14  218.49   15.22
   5   8  15   10.05    6.05
  -5   9  13    0.57    5.53
  -5   9  12   50.66    8.06
  -5   9  11   30.40    7.56
  -5   9  10  690.39   26.48
  -5   9   9    8.90    5.06
  -5   9   8 1086.18   32.64
  -5   9   7  237.43   14.59
  -5   9   6  239.39   14.40
  -5   9   5  131.55   10.54
  -5   9   4    3.51    4.91
  -5   9   4    1.95    2.12
  -5   9   3    4.62    4.75
   5   9  -3    2.73    2.08
  -5   9   3    3.87    3.16
   5   9  -2  389.03   11.19
  -5   9   2  388.36   17.30
  -5   9   2  420.08   14.08
  -5   9   1    0.15    4.50
  -5   9   1    1.09    2.46
  -5   9   1    7.98    3.47
  -5   9   0  550.06   20.76
   5  -9   0  567.51   17.84
  -5   9   0  548.00   17.79
  -5   9   0  578.28   15.21
  -5   9  -1   -1.18    2.89
  -5   9  -1    3.09    4.45
   5  -9   1   -0.19    3.50
  -5   9  -1    5.00    4.05
  -5   9  -2   39.38    4.94
   5  -9   2   35.31    5.47
  -5   9  -2   33.97    5.94
  -5   9  -3    4.57    3.80
   5  -9   3   -2.01    3.71
  -5   9  -3    5.25    4.81
   5   9   4   27.53    6.04
   5  -9   4   30.02    5.85
   5   9   5   30.69    6.79
   5  -9   5   24.30    5.62
   5   9   6   88.36    9.18
   5  -9   6   90.41    9.12
   5   9   7   -6.53    5.06
   5  -9   7    3.01    4.75
   5  -9   8  511.30   21.71
   5   9   8  491.70   19.97
   5   9   9    4.40    5.12
   5  -9   9    9.10    5.53
   5  -9  10  208.40   14.75
   5   9  10  203.40   13.53
   5   9  11    4.78    5.14
   5  -9  11    8.48    6.88
   5   9  12   64.54    9.18
   5  -9  12   90.66   10.69
   5   9  13   10.14    5.89
   5   9  14   24.74    7.42
  -5  10  12  556.21   25.60
  -5  10  11    1.76    5.84
  -5  10  10  348.22   19.41
  -5  10   9  173.10   13.86
  -5  10   8   43.26    8.00
  -5  10   7   46.78    7.80
  -5  10   6  240.38   15.36
  -5  10   5   37.17    6.98
  -5  10   4  447.63   19.81
  -5  10   3  238.80   14.48
  -5  10   2  498.24   20.64
  -5  10   1    0.40    4.86
   5  10  -1   -1.05    2.96
  -5  10   0   23.09    5.94
   5  10   0   27.23    4.25
   5 -10   1   -0.55    3.60
  -5  10  -1    5.96    4.83
  -5  10  -2  327.51   16.82
   5 -10   2  357.59   15.69
   5 -10   3   14.61    5.03
  -5  10  -3   22.76    5.83
   5  10   4  511.98   20.82
   5 -10   4  503.76   20.14
   5  10   5    6.11    5.70
   5 -10   5    2.34    4.37
   5  10   6  295.38   15.82
   5 -10   6  298.57   16.29
   5  10   7    0.65    4.62
   5 -10   7   -6.88    5.95
   5  10   8   27.98    6.25
   5 -10   8   15.07    5.67
   5  10   9   21.37    6.26
   5 -10   9   36.74    7.73
   5  10  10   19.52    5.83
   5 -10  10    9.23    5.34
   5  10  11   13.47    5.95
  -5  11   9   56.48    8.62
  -5  11   8  354.03   19.70
  -5  11   7   54.86    8.91
  -5  11   6  150.35   13.05
  -5  11   5   42.62    7.19
  -5  11   4   58.64    8.51
  -5  11   3    7.31    5.83
  -5  11   2    5.78    8.66
  -5  11   1   -6.02    5.23
  -5  11   0  424.99   19.72
  -5  11  -1    4.21    4.97
  -5  11  -2  882.25   29.32
   5  11   3   91.51    9.65
   5 -11   3   95.03    9.29
  -5  11  -3   92.06    9.92
   5  11   4   67.09    8.44
   5 -11   4   59.32    8.04
   5  11   5  154.02   11.94
   5 -11   5  149.81   11.93
   5  11   6  355.03   17.90
   5 -11   6  354.69   18.58
   5  11   7   11.84    4.82
   5 -11   7   -1.15    5.17
   5 -11   8  287.53   17.37
   5  11   8  288.55   16.53
   5  11   9    9.99    6.46
   5 -11   9   -2.20    6.62
  -5  12   7   62.27    9.23
  -5  12   6   90.48   10.64
  -5  12   5  286.57   17.43
  -5  12   4  192.38   14.45
  -5  12   3   53.66    8.63
  -5  12   2   93.05   10.39
  -5  12   1  130.02   11.76
  -5  12   0   10.67    6.24
  -5  12  -1  376.58   19.81
  -5  12  -2   70.06    9.43
   5  12   3  114.19   11.19
  -5  12  -3  114.78   11.87
   5  12   4   50.13    7.93
   5  12   5    2.87    6.25
   5 -12   5    6.56    5.87
   5  12   6  167.09   12.60
   5 -12   6  168.41   13.64
   5 -12   7  100.90   10.72
  -5  13   3  204.85   15.07
  -5  13   2  122.34   12.11
  -5  13   1   70.51    9.91
  -5  13   0   22.93    7.23
  -5  13  -1   18.34    6.07
   5  13   2   60.29    8.97
  -6   0  21   10.27    6.01
  -6   0  20    5.70    4.77
  -6   0  19    4.68    4.84
  -6   0  19   -3.15    3.53
  -6   0  18 1783.90   40.66
  -6   0  18 1839.85   37.92
  -6   0  17   -4.14    4.10
  -6   0  17    0.14    3.77
  -6   0  16 2016.63   41.87
  -6   0  16 2058.52   39.17
   6   0 -16 2038.09   39.24
  -6   0  15    3.60    3.71
  -6   0  15    1.40    3.30
   6   0 -15    0.21    2.89
  -6   0  14   58.69    6.43
  -6   0  14   62.57    5.83
   6   0 -14   53.31    5.20
  -6   0  13    0.32    3.40
  -6   0  13    3.71    3.03
   6   0 -13    3.42    2.85
  -6   0  12  534.77   16.65
   6   0 -12  509.29   14.50
  -6   0  11    1.82    3.26
   6   0 -11   -1.41    2.12
   6   0 -10 1164.71   22.48
  -6   0  10 1154.17   25.04
   6   0  -9    1.88    1.96
  -6   0   9   -7.21    3.45
   6   0  -8 2176.45   34.64
  -6   0   8 2234.09   37.62
   6   0  -7    0.06    1.85
  -6   0   7   -0.49    3.01
   6   0  -6  659.26   14.63
   6   0  -6  713.60   17.06
  -6   0   6  711.07   16.84
  -6   0   5   -4.87    3.32
   6   0  -5   -1.24    2.54
   6   0  -4 2193.89   36.72
  -6   0   4 2191.11   36.55
   6   0  -3   -1.99    2.76
  -6   0   3    0.63    3.43
   6   0  -2 3713.77   56.38
  -6   0   2 3825.34   56.90
   6   0  -1    3.01    2.99
   6   0  -1    5.99    3.88
   6   0   0  263.78   10.31
   6   0   0  256.63   10.41
   6   0   1    5.65    3.36
   6   0   1   -2.39    3.34
   6   0   2  124.19    7.67
   6   0   2  130.42    7.88
   6   0   3    5.34    3.54
  -6   0  -3    3.67    3.05
   6   0   3   -0.55    3.64
  -6   0  -4   16.60    4.40
   6   0   4   15.69    4.21
  -6   0  -5    0.23    3.40
   6   0   5    1.52    4.09
  -6   0  -6  886.12   23.67
   6   0   6  869.52   23.57
   6   0   7   -3.32    4.33
   6   0   8  453.67   17.43
   6   0   9   -1.00    4.31
   6   0   9   -0.52    4.24
   6   0  10  187.43   11.94
   6   0  11    0.23    4.58
   6   0  12   59.44    8.13
   6   0  13    1.78    5.01
   6   0  14  251.21   15.80
   6   0  15    0.83    5.39
   6   0  16  731.18   28.79
   6   0  17   -0.69    5.46
  -6   1  22  429.13   21.37
  -6   1  21    1.71    4.94
  -6  -1  20  128.48   10.35
  -6   1  20  122.74   11.14
  -6  -1  20  123.40    9.92
  -6   1  19   61.48    8.36
  -6  -1  19   66.23    8.90
  -6  -1  19   61.57    7.28
  -6  -1  18   13.84    4.47
  -6   1  18   25.22    5.84
  -6  -1  18   30.02    5.55
  -6   1  18   34.38    5.09
  -6  -1  17  180.05   10.87
  -6   1  17  185.28   12.24
  -6  -1  17  176.21   10.67
  -6   1  17  179.70    9.30
  -6  -1  16  125.14    8.69
  -6   1  16  130.36   10.03
  -6  -1  16  109.43    8.32
  -6   1  16  123.04    7.37
   6   1 -16  114.79    8.63
  -6   1  15   99.53    8.66
  -6  -1  15   98.67    7.71
  -6  -1  15  105.94    7.88
  -6   1  15  108.76    6.80
   6   1 -15   99.23    7.62
  -6  -1  14  396.24   14.41
  -6   1  14  401.86   16.17
  -6   1  14  416.28   12.73
  -6  -1  14  387.74   14.38
   6  -1 -14  406.54   12.41
   6   1 -14  377.22   14.17
  -6  -1  13    7.03    3.49
  -6   1  13   13.37    4.70
  -6  -1  13    7.18    3.27
   6   1 -13    8.17    3.39
   6  -1 -13    5.15    2.36
  -6  -1  12  654.15   17.61
  -6   1  12  619.37   19.21
   6   1 -12  619.32   17.58
   6  -1 -12  668.12   15.27
  -6   1  11  395.31   14.49
  -6  -1  11  383.69   12.66
   6   1 -11  380.65   12.71
   6  -1 -11  404.86   10.89
  -6  -1  10   48.24    4.68
  -6   1  10   45.29    5.59
   6   1 -10   49.94    4.77
   6  -1 -10   49.21    3.59
   6  -1  -9  544.47   11.94
   6   1  -9  542.41   14.73
  -6   1   9  538.87   16.31
  -6  -1   9  538.74   14.25
   6   1  -8  878.26   19.42
   6  -1  -8  881.97   16.18
  -6   1   8  889.11   21.25
  -6  -1   8  900.07   19.06
   6  -1  -7   24.07    2.37
   6   1  -7   26.45    3.30
  -6   1   7   17.68    3.88
  -6  -1   7   23.01    3.46
  -6  -1   6 1123.20   21.37
   6   1  -6 1082.34   21.59
   6  -1  -6 1047.31   18.20
   6   1  -6 1059.56   21.14
   6  -1  -6 1110.55   23.71
  -6   1   6 1069.36   23.16
  -6   1   5   62.01    5.58
   6  -1  -5   69.52    5.72
  -6  -1   5   52.67    4.45
   6   1  -5   59.48    4.67
   6  -1  -4 2464.74   41.17
   6   1  -4 2379.76   38.42
  -6   1   4 2492.06   41.04
  -6  -1   4 2453.07   38.87
   6   1  -3   16.31    3.19
  -6  -1   3   18.37    3.82
  -6   1   3   19.01    4.76
   6  -1  -3   12.44    3.13
   6  -1  -3   17.35    3.59
   6  -1  -2 1213.39   25.18
  -6   1   2 1255.48   25.73
   6   1  -2 1231.23   23.81
   6  -1  -2 1207.76   23.81
   6  -1  -1   10.61    3.53
  -6   1   1    0.29    3.86
   6   1  -1    1.13    2.71
   6  -1  -1    8.98    3.69
   6  -1   0  429.62   13.12
   6   1   0  426.40   14.27
   6  -1   0  437.37   13.97
   6   1   0  445.52   13.41
   6   1   1   19.02    3.95
   6  -1   1   20.61    4.20
   6  -1   1   19.76    4.38
   6   1   1   15.46    4.24
   6  -1   2 2817.34   46.86
  -6   1  -2 2728.14   45.50
   6   1   2 2633.35   45.79
   6  -1   2 2614.37   44.42
   6   1   3  220.04   10.53
   6  -1   3  220.39   10.61
  -6   1  -3  208.80   10.01
   6  -1   3  207.84    9.72
   6  -1   4 3016.03   51.32
  -6   1  -4 3046.05   50.46
   6   1   4 2834.54   50.43
   6  -1   4 2947.70   50.05
   6  -1   5   90.27    7.36
   6  -1   5   97.01    7.65
   6   1   5   98.98    7.83
  -6   1  -5   95.66    7.40
  -6  -1  -5   93.62    7.69
   6  -1   6   62.74    6.69
  -6  -1  -6   62.78    6.76
  -6   1  -6   63.93    6.67
   6   1   6   51.45    6.38
   6   1   7  196.21   11.22
   6  -1   7  185.25   10.76
   6  -1   7  179.58   10.77
   6   1   8   17.11    5.03
   6  -1   8   21.20    5.22
   6   1   9    5.55    4.95
   6  -1   9   -0.75    4.34
   6  -1  10  705.35   24.01
   6   1  10  737.58   24.08
   6  -1  11  277.68   15.40
   6  -1  12 1227.40   34.22
   6   1  12 1195.36   33.96
   6   1  13    1.12    5.13
   6  -1  13   14.55    6.61
   6   1  14  155.94   12.63
   6  -1  14  164.17   13.03
   6   1  15  183.28   14.09
   6  -1  15  235.00   15.87
   6  -1  16   12.91    6.22
   6   1  16   19.51    6.49
   6   1  17   43.14    9.09
  -6   2  22   40.46    8.57
  -6   2  21  114.74   11.43
  -6  -2  21  116.63   10.38
  -6   2  20  291.40   17.18
  -6  -2  20  268.53   15.03
  -6   2  19   82.32    9.84
  -6  -2  19   79.64    7.77
  -6  -2  19   99.66    9.29
  -6  -2  18  164.82    9.96
  -6   2  18  148.69   12.01
  -6  -2  18  157.80   11.57
  -6   2  17   53.68    7.47
  -6  -2  17   57.62    6.11
  -6  -2  17   60.28    7.27
  -6   2  17   47.81    4.96
  -6   2  16   38.65    6.82
  -6  -2  16   32.54    5.18
  -6  -2  16   30.65    5.32
  -6   2  16   34.98    4.25
  -6  -2  15  198.00    9.86
  -6   2  15  185.05   11.93
  -6   2  15  197.39    8.14
  -6  -2  15  202.03   11.23
  -6  -2  14   75.84    6.13
  -6   2  14   72.12    7.80
  -6  -2  14   89.62    7.49
  -6   2  14   83.20    5.00
   6   2 -14   76.16    7.19
  -6  -2  13  179.19    8.57
  -6   2  13  157.55   10.55
  -6  -2  13  168.03    9.64
   6   2 -13  176.99   10.03
  -6  -2  12    7.88    2.67
  -6   2  12   10.64    4.49
   6   2 -12    8.93    3.25
  -6  -2  11   11.17    2.78
  -6   2  11    7.45    4.13
   6   2 -11   11.25    3.23
  -6   2  10 1395.56   31.01
  -6  -2  10 1435.77   25.66
   6   2 -10 1382.59   28.88
  -6  -2   9    8.49    2.31
  -6   2   9    5.86    3.87
   6   2  -9    8.57    2.87
   6  -2  -9    9.68    1.40
  -6  -2   8  905.95   18.05
  -6   2   8  914.59   22.74
   6   2  -8  893.97   21.09
   6  -2  -8  904.63   13.75
  -6  -2   7   97.99    5.13
   6  -2  -7   95.77    3.11
   6   2  -7  102.69    6.48
  -6   2   7   99.09    7.31
  -6  -2   6  147.41    6.23
   6   2  -6  145.02    7.61
   6  -2  -6  131.81    3.97
   6   2  -6  135.07    5.91
  -6   2   6  150.87    8.46
  -6  -2   5 1163.62   21.06
   6   2  -5 1101.39   23.49
  -6   2   5 1131.34   24.94
   6   2  -5 1097.69   20.60
   6  -2  -5 1207.84   25.71
  -6   2   4   78.12    6.46
   6   2  -4   75.15    4.69
   6  -2  -4   70.99    5.99
   6  -2  -4   70.36    4.70
   6  -2  -3  569.17   16.36
   6   2  -3  536.16   13.24
  -6   2   3  554.88   16.16
   6  -2  -3  551.90   13.19
   6  -2  -2  835.29   20.35
  -6   2   2  798.33   20.11
   6  -2  -2  766.57   16.87
   6   2  -2  805.82   17.34
  -6   2   1   95.22    7.12
   6  -2  -1   87.74    6.66
   6   2  -1   85.95    5.62
   6  -2  -1   89.59    5.73
   6  -2   0 3769.27   59.49
   6   2   0 3806.42   56.73
  -6   2   0 3805.33   59.85
   6  -2   0 3748.15   55.82
  -6   2  -1   99.19    6.42
   6  -2   1   83.74    6.73
   6   2   1   98.09    7.77
   6  -2   1   96.17    6.25
   6   2   2  299.51   12.46
   6  -2   2  303.03   12.37
  -6   2  -2  298.19   11.21
   6  -2   2  296.23   11.26
   6  -2   3 1283.83   28.60
   6   2   3 1233.57   28.07
  -6   2  -3 1289.90   26.87
   6  -2   3 1211.07   26.46
   6  -2   3 1280.79   26.81
   6  -2   4  644.08   19.33
   6   2   4  613.90   18.87
  -6   2  -4  640.61   18.12
   6  -2   4  641.42   18.18
   6  -2   4  602.85   18.03
  -6   2  -5  378.38   14.05
   6  -2   5  377.15   14.90
   6   2   5  357.59   14.42
   6  -2   5  370.85   13.99
   6  -2   5  345.38   13.91
  -6   2  -6 1396.44   30.63
   6  -2   6 1336.45   31.50
   6   2   6 1312.80   30.72
   6  -2   6 1299.35   30.38
   6   2   7   20.18    5.26
   6  -2   7   14.09    4.35
   6   2   8  823.87   24.45
   6  -2   8  799.13   24.09
   6   2   9   62.13    7.75
   6  -2   9   72.32    7.84
   6  -2  10  325.41   15.91
   6   2  10  346.05   16.37
   6   2  11  292.95   15.66
   6  -2  11  301.15   15.85
   6  -2  12  339.99   17.44
   6   2  13  149.53   12.07
   6  -2  13  156.53   12.63
   6   2  14  522.54   23.00
   6  -2  14  540.13   23.29
   6   2  15   13.55    5.86
   6  -2  15    9.85    5.76
   6   2  16  212.20   15.48
   6  -2  16  204.48   15.85
   6   2  17    1.80    5.65
  -6  -3  22  105.68   11.23
  -6   3  21   18.78    6.93
  -6  -3  21   20.95    6.31
  -6   3  20  245.34   16.39
  -6  -3  20  215.77   14.32
  -6   3  19  245.74   16.01
  -6  -3  19  237.32   14.61
  -6   3  18  254.73   15.74
  -6  -3  18  245.23   14.41
  -6  -3  17  374.93   13.45
  -6   3  17  361.96   18.07
  -6  -3  17  359.98   16.84
  -6  -3  16  324.99   12.07
  -6   3  16  283.78   15.69
  -6  -3  16  289.26   14.69
  -6   3  15   16.02    4.98
  -6  -3  15   22.95    3.60
  -6  -3  15   23.92    5.43
  -6  -3  14  364.38   11.65
  -6   3  14  364.81   16.83
  -6  -3  14  356.33   15.27
  -6  -3  13    2.30    2.37
  -6   3  13    3.53    4.22
  -6   3  12    1.66    4.27
  -6  -3  12    8.32    2.29
   6   3 -12    9.43    4.16
   6   3 -11   10.79    3.99
  -6  -3  11    5.44    2.11
  -6   3  11    1.03    3.94
   6   3 -10   71.09    6.29
  -6  -3  10   78.88    4.38
  -6   3  10   78.61    7.52
  -6  -3   9 1296.89   21.58
   6   3  -9 1254.27   28.06
  -6   3   9 1246.11   29.51
  -6  -3   8  443.46   10.25
   6   3  -8  455.56   15.19
  -6   3   8  433.15   15.79
  -6  -3   7  787.10   14.92
   6   3  -7  801.33   20.53
  -6   3   7  775.41   21.21
   6  -3  -6 1988.73   29.75
   6   3  -6 2043.28   37.26
  -6   3   6 1987.95   38.15
   6  -3  -5  413.84    9.59
   6   3  -5  411.51   10.00
   6  -3  -5  442.45   15.08
  -6   3   5  422.79   14.75
   6   3  -5  422.31   14.04
   6  -3  -4  302.61   12.24
   6   3  -4  261.85    8.02
  -6   3   4  269.53   11.59
   6  -3  -4  271.46    7.68
   6  -3  -4  273.33    6.52
   6  -3  -3  692.53   19.15
  -6   3   3  691.24   18.98
   6   3  -3  646.62   14.28
   6  -3  -3  639.20   13.56
   6  -3  -3  663.48   12.92
   6  -3  -2   26.62    4.61
  -6   3   2   29.10    5.14
   6   3  -2   32.26    3.57
   6  -3  -2   22.98    2.94
   6  -3  -2   29.06    3.14
   6  -3  -1 1597.45   32.03
   6   3  -1 1528.87   27.58
  -6   3   1 1530.89   31.76
   6  -3  -1 1515.59   26.48
   6  -3  -1 1594.95   27.07
   6  -3   0  587.57   17.54
  -6   3   0  609.67   18.19
  -6   3   0  554.59   14.86
   6  -3   0  586.34   14.63
   6  -3   0  600.12   14.76
   6  -3   1  361.30   13.65
  -6   3  -1  360.29   11.83
   6   3   1  367.54   14.24
  -6   3  -1  371.88   14.29
   6  -3   1  360.23   11.71
   6  -3   1  356.58   11.57
   6  -3   2   41.03    5.36
   6  -3   2   37.62    4.45
   6   3   2   37.69    5.64
  -6   3  -2   42.59    4.65
   6  -3   2   32.72    4.15
   6  -3   3    0.08    3.07
  -6   3  -3    4.90    2.91
   6   3   3    4.30    4.30
   6  -3   3    4.19    3.38
   6  -3   4   69.47    6.84
  -6   3  -4   70.61    6.18
   6   3   4   61.84    6.80
   6  -3   4   62.40    6.18
   6   3   5  712.23   21.42
   6  -3   5  754.48   22.05
   6  -3   5  726.76   20.78
  -6   3  -5  767.58   20.75
   6   3   6   70.21    7.24
  -6   3  -6   86.23    7.47
   6  -3   6   83.87    7.49
   6   3   7 1044.30   27.64
   6  -3   7 1049.24   27.63
   6   3   8   35.79    6.17
   6  -3   8   45.36    6.76
   6   3   9  549.44   20.56
   6  -3   9  594.04   21.33
   6  -3  10  307.08   15.60
   6   3  10  298.24   15.43
   6   3  11  187.37   12.51
   6  -3  11  171.92   12.19
   6   3  12   24.39    6.06
   6  -3  12   36.81    7.13
   6  -3  13  435.67   20.63
   6  -3  14   30.39    7.33
   6  -3  15  233.25   15.87
   6   3  15  240.94   16.34
   6   3  16   15.09    6.24
   6  -3  16   15.84    7.10
  -6  -4  21  296.64   17.85
  -6   4  20   15.01    6.57
  -6  -4  20   23.66    6.65
  -6   4  19  181.50   14.29
  -6  -4  19  146.68   12.38
  -6   4  18   15.36    5.91
  -6  -4  18   18.88    6.13
  -6   4  17   27.96    7.06
  -6  -4  17   19.17    5.23
  -6   4  16   60.68    8.64
  -6  -4  16   47.06    7.28
  -6   4  15  294.44   16.26
  -6  -4  15  285.83    9.32
  -6  -4  15  264.63   14.38
  -6   4  14    4.31    4.72
  -6  -4  14    1.42    2.04
  -6   4  13  629.39   22.60
  -6  -4  13  630.10   13.35
   6  -4 -13  623.37   14.14
  -6   4  12  433.74   18.15
  -6  -4  12  459.77   10.14
   6  -4 -12  452.77   10.86
  -6   4  11 1118.80   29.87
  -6  -4  11 1128.43   18.02
   6  -4 -11 1120.27   18.70
  -6   4  10  659.41   21.67
  -6  -4  10  694.14   11.65
   6  -4 -10  643.74   11.84
  -6   4   9    0.53    4.20
   6   4  -9    2.62    3.48
  -6   4   8   53.31    6.38
   6   4  -8   47.64    5.43
  -6   4   7 1353.16   31.09
   6   4  -7 1395.94   30.56
  -6   4   6  176.53   10.16
   6   4  -6  176.31    9.54
   6  -4  -6  164.58    3.94
   6   4  -5  581.33   11.19
  -6   4   5  565.99   18.09
   6   4  -5  610.73   18.27
   6  -4  -5  575.01   10.10
   6  -4  -4   55.51    2.69
   6  -4  -4   58.59    6.30
  -6   4   4   51.34    6.26
   6   4  -4   53.10    3.33
   6   4  -3  359.14    9.60
  -6   4   3  365.94   14.05
   6  -4  -3  393.86   14.64
   6  -4  -3  370.44    8.78
   6   4  -2   41.71    3.79
   6  -4  -2   33.65    5.01
  -6   4   2   40.89    5.70
   6  -4  -2   34.87    3.16
   6  -4  -1    5.75    3.43
  -6   4   1   -2.20    4.01
  -6   4   1    0.12    2.59
   6  -4  -1    0.53    1.97
  -6   4   0  142.47    9.32
  -6   4   0  128.06    6.66
   6  -4   0  135.19    8.57
   6  -4   0  133.47    6.75
   6  -4   1 1243.75   28.54
  -6   4  -1 1213.26   24.26
  -6   4  -1 1219.84   28.72
   6  -4   1 1207.98   24.77
   6  -4   2   32.79    5.12
  -6   4  -2   33.03    5.66
   6   4   2   35.27    5.74
  -6   4  -2   39.95    4.66
   6  -4   2   31.70    4.42
   6  -4   3 1473.94   32.55
   6   4   3 1474.14   32.96
  -6   4  -3 1498.87   29.67
   6  -4   3 1435.60   30.14
   6  -4   4  144.16    9.34
   6   4   4  145.18    9.66
   6  -4   4  152.90    8.93
  -6   4  -4  155.31    8.79
   6   4   5  229.71   12.02
  -6   4  -5  242.90   11.23
   6  -4   5  234.48   12.15
  -6   4  -6   10.79    3.91
   6   4   6   11.68    4.69
   6  -4   6    7.57    3.72
   6  -4   7  189.22   11.15
   6   4   7  166.17   11.04
   6   4   8    5.85    4.71
   6  -4   8   -1.05    4.03
   6   4   9   24.23    5.98
   6  -4   9   23.74    5.37
   6  -4  10  284.35   15.31
   6   4  10  270.69   15.03
   6  -4  11  697.44   25.06
   6   4  11  690.36   24.57
   6   4  12   91.26   10.07
   6  -4  12   90.80    9.68
   6  -4  13  689.28   26.47
   6   4  13  654.74   25.27
   6  -4  14    7.34    5.40
   6  -4  15    9.00    6.50
   6   4  16   39.74    8.07
  -6  -5  20   35.59    8.22
  -6  -5  19  289.80   17.44
  -6   5  19  335.72   19.94
  -6  -5  18   37.69    6.96
  -6   5  18   44.51    7.76
  -6  -5  17  796.04   27.95
  -6   5  17  843.81   30.37
  -6   5  16  221.84   15.21
  -6   5  15  475.68   21.50
  -6   5  14   30.00    6.79
  -6   5  13  169.78   12.27
  -6   5  12   76.67    8.86
  -6   5  11  691.33   23.59
  -6   5  10   75.95    8.16
  -6   5   9 1450.34   34.81
  -6   5   8   78.72    8.22
  -6   5   7  331.84   14.59
  -6   5   6  139.22    9.50
   6   5  -5   22.17    4.48
  -6   5   5   23.23    5.38
   6   5  -5   15.64    1.41
   6   5  -4   93.10    3.91
   6   5  -4   93.24    7.48
   6  -5  -4   98.14    3.67
   6  -5  -4  104.66    8.13
  -6   5   4   92.04    7.71
   6   5  -3 1270.75   21.47
  -6   5   3 1274.19   29.88
   6  -5  -3 1249.65   21.02
   6  -5  -3 1334.08   30.63
  -6   5   2  421.46   15.84
   6  -5  -2  434.07   11.24
   6  -5  -2  440.38   16.14
  -6   5   1  663.68   15.10
  -6   5   1  678.40   20.43
   6  -5  -1  688.29   15.86
   6  -5  -1  722.87   21.08
  -6   5   0  117.57    6.25
  -6   5   0  111.92    8.55
   6  -5   0  123.83    8.70
   6  -5   0  123.08    6.59
  -6   5  -1  569.48   19.22
   6  -5   1  615.69   19.41
   6  -5   1  586.43   16.03
  -6   5  -1  571.13   15.12
   6   5   2  450.35   16.98
  -6   5  -2  440.96   16.83
   6  -5   2  448.72   16.68
   6  -5   2  436.09   14.38
  -6   5  -2  434.06   13.63
   6   5   3   88.24    7.94
   6  -5   3   90.44    7.07
  -6   5  -3   90.73    6.64
   6   5   4  152.60   10.17
   6  -5   4  136.70    8.85
  -6   5  -4  142.23    8.38
   6   5   5  425.15   16.99
   6  -5   5  434.01   16.43
  -6   5  -5  465.16   16.09
   6   5   6  113.07    9.17
   6  -5   6  127.64    9.49
   6  -5   7  359.39   15.89
   6   5   7  352.63   15.86
   6   5   8   44.53    6.79
   6  -5   8   54.16    7.14
   6  -5   9  451.12   19.12
   6   5   9  440.21   18.70
   6   5  10    4.13    4.52
   6  -5  10    6.57    5.43
   6   5  11   30.54    6.60
   6  -5  11   35.22    6.98
   6   5  12   21.37    6.33
   6  -5  12   24.44    7.02
   6   5  13  121.09   11.81
   6  -5  13  129.11   12.15
   6   5  14    7.07    5.89
   6  -5  14   23.85    6.97
   6  -5  15  402.98   21.83
  -6   6  18  118.43   13.03
  -6   6  17    0.49    5.67
  -6   6  16   61.17    9.54
  -6   6  15  594.96   24.88
  -6   6  14  112.25   11.06
  -6   6  13  520.87   22.19
  -6   6  12  144.78   11.51
  -6   6  11  110.58   10.42
  -6   6  10  290.59   15.33
  -6   6   9  206.06   12.89
  -6   6   8   15.82    5.78
  -6   6   7   27.62    5.82
  -6   6   6    3.67    4.26
  -6   6   5  946.61   26.46
  -6   6   4   39.94    6.38
   6   6  -4   34.25    2.23
   6   6  -3  584.11   12.14
   6  -6  -3  564.50   12.60
  -6   6   3  539.98   19.14
  -6   6   2   27.64    3.03
   6  -6  -2   28.33    3.39
  -6   6   2   43.14    5.96
  -6   6   1   72.53    4.62
   6  -6  -1   73.58    5.07
  -6   6   1   65.46    7.30
  -6   6   0   33.82    3.79
  -6   6   0   34.41    5.90
   6  -6   0   32.07    3.98
  -6   6  -1  449.60   17.39
   6  -6   1  444.37   14.24
  -6   6  -1  426.22   13.02
  -6   6  -2   10.07    3.54
  -6   6  -2    5.63    4.57
   6  -6   2    7.43    3.49
   6   6   3 1317.16   32.29
   6  -6   3 1264.92   29.03
  -6   6  -3 1278.27   27.62
   6   6   4   85.35    8.32
  -6   6  -4   80.52    6.85
   6  -6   4   77.40    7.16
   6   6   5 1400.37   33.97
   6  -6   5 1360.66   32.34
  -6   6  -5 1422.05   31.55
   6   6   6    5.20    4.58
   6  -6   6    8.49    4.42
   6   6   7    5.38    4.35
   6  -6   7   -1.69    4.74
   6   6   8    3.83    4.62
   6  -6   8    2.42    4.28
   6  -6   9 1041.02   30.69
   6   6   9 1000.54   29.61
   6  -6  10  171.33   12.69
   6   6  10  165.91   11.73
   6  -6  11  294.78   16.69
   6   6  11  273.02   15.73
   6   6  12   41.67    7.40
   6  -6  12   33.60    7.25
   6   6  13    8.51    5.15
   6  -6  13    9.61    5.96
   6   6  14   56.35    9.22
   6  -6  14   77.15   10.23
  -6   7  16    7.23    6.62
  -6   7  15   63.65    9.03
  -6   7  14  150.98   12.83
  -6   7  13   -8.65    5.37
  -6   7  12  123.81   11.31
  -6   7  11    8.29    4.76
  -6   7  10   13.40   12.57
  -6   7   9  847.51   27.41
  -6   7   8   -3.47    4.45
  -6   7   7  237.64   13.71
  -6   7   6   91.91    8.98
  -6   7   5   17.04    5.58
  -6   7   4  630.46   21.54
  -6   7   3   25.33    5.81
  -6   7   2  319.02   15.02
  -6   7   2  327.82    8.72
   6  -7  -2  337.09   10.70
  -6   7   1  700.33   22.87
  -6   7   1  756.49   16.09
   6  -7  -1  750.89   18.18
  -6   7   0   10.08    2.90
  -6   7   0   16.63    5.54
   6  -7   0   11.06    3.35
  -6   7  -1  606.86   21.25
   6  -7   1  629.54   17.90
  -6   7  -1  610.56   16.23
  -6   7  -2  141.12   10.60
   6  -7   2  135.54    8.71
  -6   7  -2  138.01    7.88
   6   7   3    5.53    4.74
  -6   7  -3    5.97    3.34
  -6   7  -3    9.57    4.46
   6  -7   3    7.47    4.25
   6   7   4  439.41   18.22
   6  -7   4  443.98   17.01
  -6   7  -4  458.83   15.98
   6   7   5  132.45   10.38
   6  -7   5  129.92    9.61
   6   7   6    7.19    5.01
   6  -7   6    9.76    4.77
   6   7   7  400.32   17.99
   6  -7   7  419.35   18.15
   6  -7   8  277.98   15.42
   6   7   8  263.56   14.66
   6  -7   9  341.01   17.48
   6   7   9  287.87   15.76
   6  -7  10  276.27   16.16
   6   7  10  248.40   14.97
   6   7  11    6.19    5.39
   6  -7  11   13.28    6.48
   6   7  12   99.95   10.80
   6  -7  12  129.39   11.95
   6   7  13  120.28   11.64
   6  -7  13  137.06   13.11
   6   7  14   35.80    7.32
   6   7  15  158.69   14.34
  -6   8  15  227.54   16.75
  -6   8  14    1.65    5.65
  -6   8  13  175.46   14.56
  -6   8  12   15.91    6.50
  -6   8  11   58.62    8.95
  -6   8  10  119.67   11.18
  -6   8   9   47.09    7.85
  -6   8   8  708.32   25.34
  -6   8   7  655.71   23.97
  -6   8   6  280.34   15.39
  -6   8   5   64.14    8.06
  -6   8   4  222.50   13.30
  -6   8   3   82.38    8.99
  -6   8   2  451.95   18.96
  -6   8   2  496.19   11.15
   6  -8  -2  513.47   14.36
  -6   8   2  513.53   14.56
  -6   8   1   70.49    8.18
   6  -8  -1   70.80    5.61
  -6   8   1   78.30    4.91
  -6   8   1   82.97    6.29
  -6   8   0  466.65   19.36
   6  -8   0  491.75   15.65
  -6   8   0  503.63   13.75
  -6   8   0  483.52   15.67
  -6   8  -1   43.28    4.76
  -6   8  -1   39.73    6.77
   6  -8   1   40.06    5.56
  -6   8  -1   33.37    4.98
  -6   8  -2   61.66    5.81
  -6   8  -2   63.27    7.98
   6  -8   2   59.17    6.55
  -6   8  -2   51.04    5.97
  -6   8  -3   59.68    5.96
   6   8   3   65.54    7.83
   6  -8   3   54.72    6.61
  -6   8  -3   57.75    8.11
   6   8   4   -2.37    4.60
   6  -8   4    1.87    4.21
   6   8   5    5.83    4.88
   6  -8   5    5.15    4.58
   6   8   6  637.85   23.34
   6  -8   6  658.59   23.11
   6   8   7   46.37    7.36
   6  -8   7   59.37    8.22
   6  -8   8  732.71   25.90
   6   8   8  702.55   24.85
   6   8   9    1.52    4.95
   6  -8   9   -4.63    4.89
   6   8  10   45.02    7.39
   6  -8  10   52.58    8.25
   6   8  11   47.73    7.95
   6  -8  11   56.54    9.98
   6   8  12   10.04    5.83
   6  -8  12   14.14    7.13
   6   8  13   15.46    5.88
   6   8  14   17.73    7.16
   6   8  15   25.67    7.69
  -6   9  13  122.03   12.29
  -6   9  12  707.77   28.65
  -6   9  11   -9.27    6.45
  -6   9  10   50.35    8.55
  -6   9   9   11.52    6.23
  -6   9   8  628.21   24.61
  -6   9   7   65.21    9.19
  -6   9   6  714.65   25.73
  -6   9   5    4.63    4.82
  -6   9   4  108.39   10.13
  -6   9   3   20.70    6.17
  -6   9   2  131.64   10.88
  -6   9   1   82.04    8.80
  -6   9   1   74.21    6.42
  -6   9   0    3.69    4.75
   6  -9   0    4.11    3.68
  -6   9   0    0.24    3.72
   6  -9   1  105.66    7.90
  -6   9  -1  104.75    9.65
  -6   9  -2  406.30   19.06
   6  -9   2  403.86   16.01
   6   9   3   24.85    6.28
   6  -9   3   25.58    5.23
  -6   9  -3   15.67    5.72
   6   9   4  195.85   12.99
   6  -9   4  208.12   12.36
   6   9   5   11.67    5.58
   6  -9   5   12.38    4.86
   6   9   6    1.09    5.14
   6  -9   6    3.07    4.87
   6   9   7   79.79    9.41
   6  -9   7   71.55    8.78
   6   9   8    2.31    5.20
   6  -9   8    1.39    4.83
   6   9   9    5.17    5.64
   6  -9   9   -4.06    5.47
   6  -9  10  281.78   17.23
   6   9  10  284.37   16.82
   6   9  11   30.94    7.41
   6  -9  11   63.65   10.07
   6   9  12  466.49   22.19
   6   9  13    9.15    6.86
  -6  10  11   27.69    7.63
  -6  10  10  476.11   23.08
  -6  10   9   18.90    6.23
  -6  10   8  287.89   17.47
  -6  10   7   59.07    9.29
  -6  10   6   12.47    7.15
  -6  10   5   21.52    5.81
  -6  10   4   14.03    5.57
  -6  10   3  112.03   10.70
  -6  10   2  124.04   10.88
  -6  10   1   65.32    8.69
  -6  10   0  733.51   26.39
   6 -10   1    3.35    3.58
  -6  10  -1   -0.58    5.07
   6 -10   2  112.85    9.06
  -6  10  -2  106.33   10.55
   6  10   3   62.49    8.47
   6 -10   3   55.80    7.45
  -6  10  -3   55.32    8.65
   6  10   4   -3.85    5.45
   6 -10   4   10.93    4.81
   6  10   5   -3.18    5.16
   6 -10   5   10.51    5.34
   6  10   6  384.99   18.79
   6 -10   6  371.32   18.52
   6  10   7    4.50    5.63
   6 -10   7    4.66    4.90
   6 -10   8  334.58   18.58
   6  10   8  296.41   17.11
   6  10   9   -2.03    5.28
   6 -10   9    4.94    7.57
   6  10  10   93.32   10.42
   6 -10  10  106.10   11.64
   6  10  11    1.71    5.41
  -6  11   8    1.52    6.33
  -6  11   7   13.06    6.62
  -6  11   6  303.24   17.90
  -6  11   5    9.90    5.34
  -6  11   4  595.04   24.93
  -6  11   3  103.19   11.12
  -6  11   2  110.40   10.77
  -6  11   1  177.90   13.54
  -6  11   0   42.31    7.77
  -6  11  -1   16.75    6.78
  -6  11  -2  286.86   17.40
   6 -11   2  308.01   15.28
   6  11   3   39.89    7.93
   6 -11   3   42.34    7.45
  -6  11  -3   34.68    8.13
   6  11   4  657.47   25.84
   6 -11   4  680.19   24.66
   6  11   5   -7.10    6.58
   6 -11   5   -4.81    5.66
   6  11   6   68.16    9.01
   6 -11   6   70.75    9.04
   6  11   7  239.54   15.44
   6 -11   7  258.84   16.47
   6  11   8  111.23   11.06
   6 -11   8  109.86   11.18
   6  11   9   50.14    8.22
  -6  12   5  189.23   14.86
  -6  12   4   23.23    7.24
  -6  12   3  201.26   15.12
  -6  12   2   49.67    8.31
  -6  12   1   59.81    9.20
  -6  12   0  133.76   13.12
  -6  12  -1  245.91   16.90
   6  12   2   43.08    8.07
  -6  12  -2   27.15    7.41
   6  12   3  559.98   24.33
   6  12   4   39.19    7.89
   6  12   5  108.24   11.20
   6 -12   5  109.74   10.93
   6  12   6   27.67    6.53
   6 -12   6   30.68    7.81
  -6  13   0    5.63    5.74
  -6  13  -1  106.41   12.61
  -7   0  21    3.50    5.04
  -7   0  20   19.87    5.76
  -7   0  19   -3.52    4.18
  -7   0  18   23.32    5.67
  -7   0  17   -6.18    4.59
  -7   0  16  972.59   26.71
  -7   0  15   -0.98    3.96
   7   0 -15    0.23    2.80
  -7   0  14 2855.23   51.08
   7   0 -14 2776.98   46.94
  -7   0  13    4.90    3.71
   7   0 -13   -2.29    2.77
  -7   0  12   27.40    4.73
   7   0 -12   26.94    3.93
  -7   0  11   -5.81    3.66
   7   0 -11    1.22    2.02
   7   0 -10  957.42   20.17
  -7   0  10  941.98   22.58
   7   0  -9    0.65    2.04
  -7   0   9    4.78    3.21
   7   0  -8  287.48    9.53
  -7   0   8  313.87   11.66
   7   0  -7   -1.26    1.86
  -7   0   7   -5.01    3.30
   7   0  -6   53.51    4.20
   7   0  -6   50.89    5.00
  -7   0   6   56.61    5.34
   7   0  -5    0.23    2.78
  -7   0   5    2.65    3.40
   7   0  -4  741.31   18.56
  -7   0   4  721.17   18.51
  -7   0   3   -0.07    3.51
   7   0  -3    2.66    3.04
   7   0  -2    8.25    3.33
   7   0  -2    9.15    4.05
   7   0  -1    1.39    2.89
   7   0  -1   -3.48    3.32
   7   0   0 1739.29   34.08
   7   0   0 1815.94   34.25
   7   0   1    4.43    3.37
   7   0   1   -0.41    3.38
   7   0   2  853.71   22.26
   7   0   2  830.32   21.78
   7   0   3   -0.71    3.14
   7   0   3    4.25    4.19
   7   0   4  285.63   12.84
  -7   0  -4  282.08   12.89
   7   0   4  276.48   12.61
  -7   0  -5    3.48    3.85
   7   0   5    1.83    3.77
   7   0   6  244.83   12.72
   7   0   7    3.65    4.35
   7   0   8  115.65    9.57
   7   0   9   -1.61    4.44
   7   0  10 1440.39   37.22
   7   0  11   -5.87    5.70
   7   0  12  622.67   24.52
   7   0  13   -4.71    5.86
   7   0  14   28.96    6.49
   7   0  15    5.03    5.99
   7   0  16  233.40   16.84
  -7   1  22   49.35    8.58
  -7   1  21  263.54   16.37
  -7   1  20  248.57   15.45
  -7   1  19    9.78    5.06
  -7  -1  19   21.47    5.48
  -7  -1  19   13.29    4.68
  -7  -1  18  841.84   24.79
  -7   1  18  816.98   26.62
  -7  -1  17  160.63   10.29
  -7   1  17  150.37   11.10
  -7  -1  16  123.86    8.89
  -7   1  16  131.03   10.25
  -7   1  15  153.46   10.55
  -7  -1  15  166.07    9.76
   7   1 -15  142.37    8.97
  -7  -1  14  175.00    9.67
  -7   1  14  162.90   10.48
   7  -1 -14  163.49    7.54
   7   1 -14  160.65    9.19
  -7  -1  13   75.12    6.53
  -7   1  13   68.49    7.04
   7   1 -13   65.90    6.04
   7  -1 -13   75.69    4.97
  -7   1  12  268.97   12.69
  -7  -1  12  272.43   11.18
   7   1 -12  259.60   10.94
   7  -1 -12  276.64    9.14
  -7   1  11   28.84    4.95
  -7  -1  11   37.94    4.74
   7  -1 -11   40.37    3.59
   7   1 -11   38.77    4.49
   7  -1 -10  812.93   16.35
   7   1 -10  802.42   19.60
  -7   1  10  802.38   21.57
  -7  -1  10  839.12   19.78
   7   1  -9  923.27   20.98
   7  -1  -9  956.97   17.85
  -7  -1   9  939.16   20.93
  -7   1   9  962.54   23.46
  -7  -1   8  413.43   12.61
   7  -1  -8  393.51    9.96
   7   1  -8  404.50   12.60
  -7   1   8  415.47   14.31
  -7  -1   7  161.76    7.69
   7   1  -7  177.88    8.05
   7  -1  -7  164.01    6.09
  -7   1   7  168.78    8.90
  -7  -1   6   99.79    6.25
  -7   1   6  102.00    7.14
   7  -1  -6   93.78    4.67
   7   1  -6   97.69    6.04
   7   1  -6   96.25    6.11
   7  -1  -6   93.33    6.95
   7   1  -5   64.89    5.18
   7  -1  -5   65.23    5.82
  -7  -1   5   57.51    5.05
  -7   1   5   62.06    5.89
   7   1  -4 1827.30   32.96
   7  -1  -4 1950.51   35.72
  -7  -1   4 1875.59   33.34
  -7   1   4 1844.46   35.04
   7   1  -3   20.01    3.71
  -7   1   3   12.60    4.23
   7  -1  -3   16.47    3.57
   7  -1  -3   16.13    3.57
   7  -1  -2 2245.64   40.09
  -7   1   2 2229.47   40.41
   7  -1  -2 2181.70   38.09
   7   1  -2 2212.77   38.18
   7  -1  -1   54.65    5.52
  -7   1   1   56.23    6.10
   7   1  -1   58.00    5.35
   7   1  -1   51.62    6.11
   7  -1  -1   52.98    5.17
   7   1   0  334.39   12.18
   7  -1   0  306.70   12.32
   7   1   0  294.81   12.51
   7  -1   0  280.10   11.22
   7   1   1   -2.97    3.20
   7  -1   1   10.99    3.97
   7  -1   1    7.23    3.81
   7   1   1   -3.70    3.92
   7   1   2    7.32    3.68
   7  -1   2    6.89    3.15
   7  -1   2    2.64    3.49
   7   1   2   -5.02    4.14
   7  -1   3  114.29    8.28
  -7   1  -3  115.70    8.27
   7  -1   3  105.81    7.77
   7   1   3  112.40    8.25
   7  -1   4 1365.18   31.50
  -7   1  -4 1401.35   30.91
   7  -1   4 1276.80   29.60
   7   1   4 1278.34   30.35
  -7   1  -5   59.73    6.49
   7  -1   5   54.81    6.34
   7   1   5   48.60    6.41
   7   1   6  472.78   17.88
   7  -1   6  482.66   17.62
   7  -1   7   19.39    5.84
   7   1   7   23.28    5.61
   7  -1   7   17.18    5.08
   7   1   8   78.93    8.49
   7  -1   8   84.10    8.40
   7  -1   8   85.12    8.64
   7   1   9    2.06    4.65
   7  -1   9    4.99    4.82
   7  -1  10  179.93   12.59
   7   1  10  167.36   11.94
   7   1  11    8.16    4.95
   7  -1  11   13.09    5.83
   7  -1  12  313.00   17.27
   7   1  12  303.62   17.15
   7  -1  13  298.46   17.28
   7   1  13  284.02   17.26
   7   1  14  574.77   24.98
   7  -1  14  581.41   24.90
   7   1  15   47.74    8.56
   7  -1  15   56.52    9.72
   7   1  16  119.51   12.45
  -7   2  22   71.37   10.56
  -7   2  21   29.02    6.80
  -7   2  20   43.11    8.28
  -7  -2  20   31.34    6.32
  -7   2  19   89.10   10.13
  -7   2  18   56.95    8.59
  -7  -2  18   68.57    6.90
  -7  -2  17  183.80   10.08
  -7   2  17  172.71   12.49
  -7  -2  16  401.87   14.50
  -7   2  16  352.13   17.07
  -7   2  15    8.52    4.98
  -7  -2  15   -0.27    3.22
  -7   2  14  113.95    9.40
  -7  -2  14  132.35    7.74
   7   2 -14  116.34    8.40
  -7   2  13  203.16   11.96
  -7  -2  13  211.08    9.28
   7   2 -13  197.76   10.55
  -7   2  12  147.17    9.90
  -7  -2  12  159.28    7.85
   7   2 -12  151.44    9.01
  -7  -2  11  294.80   10.30
  -7   2  11  286.93   13.43
   7   2 -11  273.73   11.92
  -7  -2  10  453.42   12.81
  -7   2  10  429.89   16.01
   7   2 -10  411.78   14.43
   7  -2 -10  452.65    8.87
  -7  -2   9  145.22    6.88
   7   2  -9  129.91    7.77
   7  -2  -9  141.82    4.30
  -7   2   9  136.64    8.99
  -7  -2   8  414.93   11.77
   7  -2  -8  410.54    8.19
   7   2  -8  408.57   13.75
  -7   2   8  406.53   14.95
   7  -2  -7   31.86    2.35
   7   2  -7   41.34    4.52
  -7   2   7   35.38    5.27
  -7  -2   7   36.88    3.87
  -7  -2   6 2254.81   36.48
   7  -2  -6 2175.98   31.76
   7   2  -6 2270.80   39.60
   7   2  -6 2243.66   36.26
   7  -2  -6 2362.32   42.09
  -7   2   6 2217.80   41.02
  -7   2   5    6.81    3.73
   7   2  -5    3.17    2.41
   7  -2  -5    6.79    3.33
   7  -2  -5    2.15    2.61
   7  -2  -4  258.88   11.34
   7   2  -4  236.39    8.98
   7  -2  -4  240.02    9.05
  -7   2   4  244.22   11.13
   7  -2  -3  690.37   19.14
   7   2  -3  618.06   15.80
  -7   2   3  658.28   18.90
   7  -2  -3  632.41   15.60
   7  -2  -2  139.94    8.52
  -7   2   2  123.51    8.29
   7   2  -2  126.92    7.02
   7  -2  -2  123.55    6.80
   7  -2  -1  569.65   17.57
   7   2  -1  569.79   15.73
  -7   2   1  559.85   17.73
   7  -2  -1  554.83   15.24
   7  -2   0  716.45   20.17
  -7   2   0  710.03   20.33
   7   2   0  720.75   18.65
   7   2   0  699.44   20.44
   7  -2   0  659.99   17.42
   7  -2   1  146.39    9.01
   7   2   1  154.12    8.42
   7   2   1  145.90    9.27
   7  -2   1  152.96    8.36
   7  -2   2 2009.31   39.07
   7   2   2 1900.72   38.52
  -7   2  -2 1953.87   36.98
   7  -2   2 1861.29   35.99
  -7   2  -3  344.31   13.49
   7  -2   3  367.87   14.77
   7   2   3  345.43   14.40
   7  -2   3  337.12   13.24
   7  -2   3  355.25   13.52
  -7   2  -4  126.27    8.65
   7  -2   4  131.98    8.72
   7  -2   4  114.06    8.25
   7   2   4  117.32    8.75
  -7   2  -5  382.08   15.16
   7  -2   5  391.57   15.11
   7  -2   5  358.64   14.76
   7   2   5  354.99   15.36
   7   2   6  567.38   20.04
   7  -2   6  613.66   19.93
   7  -2   6  603.44   20.04
   7  -2   7  131.71   10.08
   7   2   7  148.97   10.61
   7   2   8  555.95   20.73
   7  -2   8  546.08   20.41
   7   2   9   -9.97    5.22
   7  -2   9    5.22    4.28
   7  -2  10  461.26   19.73
   7   2  10  449.41   19.59
   7   2  11   40.98    7.10
   7  -2  11   29.36    6.78
   7   2  12   86.08   10.12
   7  -2  12   95.83   10.49
   7   2  13  281.48   17.18
   7  -2  13  288.91   17.14
   7   2  14   42.56    8.35
   7  -2  14   38.71    8.21
   7   2  15   41.75    8.07
   7  -2  15   35.45    7.47
  -7   3  21   11.39    6.07
  -7   3  20   33.88    7.45
  -7   3  19    6.18    4.98
  -7   3  18   67.09    9.17
  -7   3  17   42.05    7.63
  -7   3  16  191.58   13.43
  -7  -3  16  190.82    9.00
  -7   3  15  419.64   18.87
  -7  -3  15  409.40   12.94
  -7  -3  14  109.28    6.43
  -7   3  14   91.85    9.26
  -7   3  13   80.35    8.24
  -7  -3  13   91.94    5.51
  -7   3  12 1091.28   29.61
  -7  -3  12 1146.35   22.04
  -7  -3  11  173.14    7.09
   7   3 -11  167.80    9.82
  -7   3  11  150.74   10.31
   7   3 -10   50.74    5.85
  -7   3  10   55.88    6.86
  -7  -3  10   54.87    4.04
   7   3  -9   49.82    5.60
  -7  -3   9   58.44    4.08
  -7   3   9   49.87    6.41
  -7  -3   8  100.19    5.19
   7   3  -8   98.31    7.39
  -7   3   8  102.06    8.22
   7  -3  -7  867.73   17.02
  -7   3   7  873.18   23.58
   7   3  -7  868.43   22.32
   7  -3  -6    6.84    2.21
   7  -3  -6    3.13    2.95
   7   3  -6    6.90    2.40
  -7   3   6   10.94    4.36
   7   3  -6   10.25    3.66
   7  -3  -6    3.85    0.84
   7  -3  -6    4.04    0.88
   7  -3  -5 2022.40   38.80
  -7   3   5 1846.90   37.34
   7   3  -5 1833.22   30.53
   7  -3  -5 1840.00   29.82
   7  -3  -5 1881.20   26.73
   7   3  -4  236.18    8.50
   7  -3  -4  265.28   12.24
  -7   3   4  248.83   11.78
   7  -3  -4  255.50    7.20
   7  -3  -4  240.61    8.14
   7  -3  -3  324.36   13.32
  -7   3   3  298.74   12.86
   7   3  -3  293.36    9.82
   7  -3  -3  284.99    9.27
   7  -3  -3  303.22    8.74
   7  -3  -2  453.83   16.02
  -7   3   2  459.53   16.24
   7   3  -2  457.12   13.07
   7  -3  -2  456.35   11.91
   7  -3  -2  438.42   12.30
   7  -3  -1  236.82   11.31
   7   3  -1  232.35    9.49
  -7   3   1  207.78   11.16
   7  -3  -1  210.98    8.54
   7  -3  -1  214.59    8.43
   7  -3   0  279.10   12.53
   7   3   0  270.79   10.66
  -7   3   0  264.95   12.57
   7  -3   0  283.22   10.43
   7  -3   0  282.82   10.46
   7  -3   1 2691.49   49.03
  -7   3  -1 2761.59   45.69
   7   3   1 2733.15   49.83
   7  -3   1 2615.44   44.57
   7  -3   1 2694.06   44.84
   7  -3   2   16.46    4.21
  -7   3  -2   12.53    3.53
   7  -3   2   10.72    3.33
   7   3   2    9.83    4.20
   7  -3   2   12.17    3.52
   7   3   3 1036.96   26.87
  -7   3  -3 1062.97   24.79
   7  -3   3  968.44   24.21
   7  -3   3  978.39   24.03
   7   3   4   68.44    7.43
  -7   3  -4   55.10    5.88
   7  -3   4   52.30    5.90
   7   3   5   13.09    4.64
  -7   3  -5   17.49    4.81
   7  -3   5    7.84    4.04
   7   3   6   33.20    6.14
   7  -3   6   26.23    5.51
   7   3   7   99.89    9.14
   7  -3   7  114.62    9.32
   7   3   8  644.58   22.66
   7  -3   8  646.48   22.50
   7   3   9  400.56   18.17
   7  -3   9  423.47   18.58
   7   3  10   31.69    7.06
   7  -3  10   22.21    6.25
   7   3  11  658.36   24.72
   7  -3  11  657.77   24.78
   7   3  12  246.42   15.50
   7  -3  12  275.67   16.54
   7   3  13   18.38    6.43
   7  -3  13   15.63    6.20
   7  -3  14  166.90   13.98
   7   3  15   88.98   10.70
   7  -3  15  128.84   12.80
  -7   4  20   44.03    8.95
  -7   4  19  678.19   27.70
  -7   4  18   30.73    7.42
  -7   4  17  210.08   14.55
  -7   4  16   95.07   10.32
  -7   4  15   32.63    6.71
  -7   4  14  161.11   12.26
  -7  -4  14  166.45    6.47
  -7   4  13  433.99   18.79
  -7  -4  13  414.54   10.14
  -7   4  12   31.48    6.37
  -7  -4  12   28.72    2.77
  -7   4  11 1102.90   30.26
  -7  -4  11 1099.66   18.44
  -7   4  10  391.44   16.72
  -7   4   9  970.32   26.99
   7  -4  -9 1007.69   15.99
  -7   4   8  149.44   10.20
   7   4  -8  157.67    9.75
   7  -4  -8  170.05    4.77
   7  -4  -7    7.01    1.54
  -7   4   7    0.40    3.95
   7   4  -7    1.83    3.04
   7   4  -6   56.34    3.61
  -7   4   6   50.65    6.38
   7   4  -6   62.54    6.33
   7  -4  -6   56.61    3.03
  -7   4   5 1231.86   29.16
   7   4  -5 1228.43   20.70
   7   4  -5 1295.75   28.81
   7  -4  -5 1305.42   19.79
  -7   4   4  104.45    8.37
   7   4  -4   87.86    4.94
   7  -4  -4  100.80    4.13
   7  -4  -4   99.65    4.73
  -7   4   3  502.44   17.57
   7   4  -3  495.40   12.81
   7  -4  -3  542.29   18.24
   7  -4  -3  502.61   11.63
   7  -4  -3  508.55   12.22
  -7   4   2  147.04    9.65
   7   4  -2  160.12    7.32
   7  -4  -2  175.61   10.44
   7  -4  -2  154.81    6.64
   7  -4  -2  171.30    7.01
   7  -4  -1  437.62   16.20
  -7   4   1  396.64   15.95
   7   4  -1  407.88   12.61
   7  -4  -1  406.35   12.01
  -7   4   0   36.87    6.19
  -7   4   0   30.39    4.32
   7  -4   0   33.86    3.99
   7   4   1  284.27   13.76
  -7   4  -1  294.61   14.03
  -7   4  -1  294.49   11.24
   7  -4   1  283.13   11.08
  -7   4  -2  120.95    7.66
   7   4   2  124.64    9.68
   7  -4   2  134.76    8.12
   7   4   3  311.14   14.43
  -7   4  -3  322.84   12.69
   7  -4   3  320.55   13.04
  -7   4  -4   45.58    5.50
   7   4   4   42.89    6.75
   7  -4   4   37.61    5.16
  -7   4  -5 1201.00   28.58
   7   4   5 1138.87   30.21
   7  -4   5 1167.18   28.84
   7   4   6   32.02    6.17
   7  -4   6   22.86    5.42
   7   4   7  508.63   19.86
   7  -4   7  517.89   19.49
   7   4   8   34.30    6.75
   7  -4   8   41.86    6.52
   7   4   9   49.32    7.35
   7  -4   9   61.37    8.05
   7   4  10   43.93    7.74
   7  -4  10   36.45    6.92
   7   4  11    9.00    5.33
   7  -4  11   11.30    5.96
   7   4  12   16.66    7.01
   7  -4  12   14.88    6.16
   7  -4  13  380.42   20.00
   7   4  13  380.74   19.83
   7   4  14    5.70    5.44
   7  -4  14   15.47    6.72
  -7   5  18   31.55    7.67
  -7   5  17  419.26   21.55
  -7   5  16  103.87   11.05
  -7   5  15  947.43   31.21
  -7   5  14   92.97   10.06
  -7   5  13  418.06   19.41
  -7   5  12   94.22    9.20
  -7   5  11   35.78    6.77
  -7   5  10   44.35    6.84
  -7   5   9  581.58   21.03
  -7   5   8   68.20    7.79
  -7   5   7  311.72   14.77
  -7   5   6   20.34    5.14
  -7   5   5  553.88   19.42
   7   5  -5  546.96   11.14
  -7   5   4   15.63    5.22
   7   5  -4   16.58    2.59
   7  -5  -4   16.91    1.96
  -7   5   3   15.11    4.52
   7   5  -3   18.84    3.08
   7  -5  -3   17.25    2.60
   7   5  -2   39.92    4.06
  -7   5   2   28.28    5.28
   7  -5  -2   41.74    3.79
  -7   5   1  546.97   19.39
  -7   5   1  524.63   14.23
   7  -5  -1  554.41   14.44
  -7   5   0   82.31    5.88
   7  -5   0   91.59    6.14
  -7   5   0   87.57    8.31
  -7   5  -1  462.38   18.10
  -7   5  -1  458.56   14.32
   7  -5   1  460.27   14.66
   7   5   2   86.78    8.41
  -7   5  -2   77.06    6.26
   7  -5   2   89.22    7.06
  -7   5  -2   78.50    8.19
  -7   5  -3  646.22   18.77
   7   5   3  685.30   22.46
   7  -5   3  633.50   19.30
   7   5   4  125.51    9.92
   7  -5   4  108.19    8.17
  -7   5  -4  117.90    8.15
   7   5   5  350.54   16.06
   7  -5   5  333.64   14.76
   7   5   6   12.18    4.93
   7  -5   6    9.09    4.62
   7   5   7   87.15    9.25
   7  -5   7   87.08    8.87
   7   5   8   74.15    8.66
   7  -5   8   72.40    8.57
   7  -5   9  671.39   24.34
   7   5   9  628.17   23.73
   7   5  10   47.00    7.58
   7  -5  10   41.32    7.73
   7  -5  11  351.62   18.45
   7   5  11  329.84   18.07
   7   5  12   16.68    6.05
   7  -5  12   26.10    6.59
   7   5  13   73.81    9.90
   7  -5  13   87.48   10.35
   7   5  14   12.78    6.88
   7  -5  14   16.93    6.27
  -7   6  17   85.67   10.79
  -7   6  16  170.33   14.22
  -7   6  15    1.06    5.17
  -7   6  14    3.88    5.48
  -7   6  13  126.75   11.38
  -7   6  12   -2.46    5.59
  -7   6  11  796.84   27.04
  -7   6  10   -1.88    4.64
  -7   6   9  539.61   21.01
  -7   6   8  403.25   17.82
  -7   6   7  279.21   14.77
  -7   6   6  186.26   11.81
  -7   6   5  200.79   12.05
   7   6  -5  174.67    4.34
   7  -6  -4    2.01    1.53
   7   6  -4    1.02    1.84
  -7   6   4    3.37    4.53
   7   6  -3 1316.55   23.19
  -7   6   3 1261.83   32.37
   7  -6  -3 1336.91   23.05
   7  -6  -2   28.64    3.44
   7   6  -2   30.88    3.74
  -7   6   2   12.62    4.62
  -7   6   1 1375.94   33.85
  -7   6   1 1316.82   25.35
   7  -6  -1 1402.73   26.71
  -7   6   0   22.11    3.73
   7  -6   0   21.61    3.59
  -7   6   0   23.17    5.55
  -7   6  -1  237.91   13.60
  -7   6  -1  224.73    9.78
   7  -6   1  249.92   10.94
  -7   6  -2  -11.60    5.48
   7   6   2   -3.21    4.84
  -7   6  -2    2.53    3.06
   7  -6   2    8.12    4.01
   7   6   3  335.17   15.94
   7  -6   3  313.86   13.47
  -7   6  -3  339.35   13.37
   7   6   4  246.73   13.82
   7  -6   4  243.15   12.29
  -7   6  -4  266.43   12.36
   7   6   5  893.05   27.39
   7  -6   5  895.59   25.76
   7   6   6   -5.56    5.14
   7  -6   6   -3.32    4.91
   7  -6   7  764.01   24.85
   7   6   7  723.22   24.98
   7   6   8  106.40   10.39
   7  -6   8   96.38    9.62
   7   6   9   65.78    8.87
   7  -6   9   71.62    8.84
   7   6  10    8.31    5.02
   7  -6  10   13.34    6.25
   7   6  11  150.65   12.46
   7  -6  11  158.23   12.90
   7   6  12   87.28   10.49
   7  -6  12  105.99   11.41
   7  -6  13  238.45   16.42
   7   6  13  247.66   16.52
   7   6  14  121.20   12.47
  -7   7  16   15.90    6.69
  -7   7  15  177.81   14.31
  -7   7  14   -3.07    6.01
  -7   7  13  152.49   13.04
  -7   7  12   44.97    7.61
  -7   7  11  196.17   13.84
  -7   7  10  434.41   20.19
  -7   7   9   66.45   14.50
  -7   7   8  185.61   12.88
  -7   7   7  759.77   25.72
  -7   7   6   12.73    5.54
  -7   7   5  373.52   17.31
  -7   7   4  304.01   15.38
   7   7  -4  288.37    6.85
   7   7  -3  281.54    8.41
  -7   7   3  245.90   14.03
   7  -7  -3  279.99    9.01
  -7   7   2  622.23   22.46
   7  -7  -2  671.49   16.22
  -7   7   1    8.97    2.88
   7  -7  -1   15.99    3.31
  -7   7   1   16.49    5.40
  -7   7   0  501.43   20.15
  -7   7   0  518.51   14.45
   7  -7   0  492.06   15.33
  -7   7  -1  469.05   14.60
  -7   7  -1  438.18   19.03
   7  -7   1  480.49   15.85
   7   7   2    2.53    4.83
  -7   7  -2    6.07    3.71
  -7   7  -2    1.16    4.84
   7  -7   2    0.50    3.30
   7   7   3  999.77   29.85
   7  -7   3  986.66   26.05
  -7   7  -3  971.43   24.54
   7   7   4  703.52   24.34
   7  -7   4  667.41   21.64
   7   7   5    0.43    4.78
   7  -7   5   -1.54    4.27
   7   7   6  447.40   19.56
   7  -7   6  467.22   19.18
   7   7   7  293.52   15.95
   7  -7   7  317.78   16.21
   7   7   8   92.46    9.55
   7  -7   8   93.08    9.24
   7  -7   9  409.46   19.47
   7   7   9  381.93   19.32
   7   7  10   32.51   11.27
   7  -7  10   27.67    6.81
   7   7  11   37.71    7.60
   7  -7  11   40.11    8.29
   7   7  12   29.79    7.75
   7  -7  12   42.06    8.46
   7   7  13    7.12    6.74
   7   7  14   78.79   10.45
  -7   8  14  537.24   25.33
  -7   8  13  155.45   13.35
  -7   8  12   95.39   10.81
  -7   8  11  125.37   11.86
  -7   8  10  131.70   12.00
  -7   8   9   19.85    5.59
  -7   8   8  228.63   14.60
  -7   8   7   -5.02    5.33
  -7   8   6  506.85   21.28
  -7   8   5  286.92   15.87
  -7   8   4  460.31   19.89
  -7   8   3  101.58   10.00
   7  -8  -2    3.69    2.67
  -7   8   2   12.89    5.78
   7  -8  -1   72.59    5.77
  -7   8   1   68.32    8.25
  -7   8   0  500.36   14.29
  -7   8   0  491.29   20.76
   7  -8   0  534.17   16.53
  -7   8  -1   15.01    3.62
  -7   8  -1   19.74    5.85
   7  -8   1   21.64    4.58
  -7   8  -2  492.24   21.07
   7  -8   2  504.05   17.71
  -7   8  -2  514.13   16.24
   7   8   3   66.53    8.23
  -7   8  -3   62.31    6.62
   7  -8   3   62.66    7.03
   7   8   4   48.72    7.68
   7  -8   4   48.94    6.83
   7   8   5   29.73    6.72
   7  -8   5   18.50    5.33
   7   8   6    5.84    4.93
   7  -8   6    6.29    4.28
   7   8   7  170.74   13.10
   7  -8   7  191.05   13.05
   7  -8   8  346.84   18.27
   7   8   8  332.02   17.83
   7   8   9   51.28    8.16
   7  -8   9   71.46    8.87
   7  -8  10  805.60   29.59
   7   8  10  721.32   27.63
   7   8  11   -1.77    5.83
   7  -8  11   -3.12    5.57
   7   8  12  103.94   11.67
   7   8  13   21.64    7.35
  -7   9  12  279.96   17.94
  -7   9  11   38.69    8.20
  -7   9  10  619.11   26.19
  -7   9   9   21.32    7.43
  -7   9   8   90.67   10.36
  -7   9   7    5.48    5.76
  -7   9   6  149.36   12.66
  -7   9   5   35.78    7.67
  -7   9   4  671.03   25.22
  -7   9   3   -2.50    5.33
  -7   9   2  318.72   17.25
   7  -9  -1    1.42    2.97
  -7   9   1    9.31    5.97
  -7   9   0  152.99   12.37
   7  -9   0  146.29    8.93
   7  -9   1   11.96    4.00
  -7   9  -1    4.92    5.09
   7  -9   2   64.21    7.02
  -7   9  -2   54.63    8.31
   7   9   3    0.07    5.14
   7  -9   3   -3.81    3.67
   7   9   4  225.19   14.67
   7  -9   4  221.76   13.06
   7   9   5    5.77    5.44
   7  -9   5    3.95    4.15
   7   9   6  300.04   17.21
   7  -9   6  305.70   16.11
   7   9   7   41.90    8.06
   7  -9   7   35.57    7.20
   7  -9   8  357.94   18.61
   7   9   8  353.80   18.82
   7   9   9   15.95    6.21
   7  -9   9   10.97    5.68
   7   9  10   18.15    6.58
   7  -9  10   13.58    6.62
   7   9  11   54.31    8.75
  -7  10  10   13.32    6.83
  -7  10   9   14.35    6.55
  -7  10   8  506.29   23.65
  -7  10   7    0.01    5.37
  -7  10   6  693.81   27.29
  -7  10   5    2.91    6.11
  -7  10   4   61.15    9.07
  -7  10   3    8.28    5.23
  -7  10   2   11.72    5.26
  -7  10   1    5.47    5.92
   7 -10   0  155.30    9.56
  -7  10   0  133.56   15.18
   7 -10   1  103.76    8.46
  -7  10  -1  117.34   11.78
   7  10   2  813.42   29.01
  -7  10  -2  782.91   28.88
   7 -10   2  853.99   25.45
   7  10   3   12.26    6.48
   7 -10   3   41.53    7.04
   7  10   4  164.45   13.26
   7 -10   4  176.27   12.37
   7  10   5   81.35   10.00
   7 -10   5   88.31    9.71
   7  10   6   -2.06    5.39
   7 -10   6   10.52    5.62
   7  10   7   47.70    8.48
   7 -10   7   27.67    7.16
   7  10   8  137.96   12.28
   7 -10   8  152.95   13.40
   7  10   9   91.87   10.99
   7 -10   9  105.99   11.07
   7  10  10  358.94   19.91
  -7  11   7   76.92   10.79
  -7  11   6   30.89    8.72
  -7  11   5   44.10    8.83
  -7  11   4  143.36   13.16
  -7  11   3    3.29    5.25
  -7  11   2  693.84   27.46
  -7  11   1   69.72   10.13
  -7  11   0  302.02   18.24
  -7  11  -1  164.99   13.32
   7  11   2    2.07    5.68
  -7  11  -2   -4.25    5.90
   7  11   3   14.01    6.38
   7  11   4  333.15   18.73
   7 -11   4  321.24   16.89
   7  11   5   10.80    7.70
   7 -11   5   16.16    5.90
   7  11   6  257.71   16.63
   7 -11   6  260.53   16.39
   7  11   7    2.24    6.44
   7 -11   7  -11.58    6.92
   7  11   8  192.75   15.01
  -7  12   2   24.65    8.48
  -7  12   1   92.67   11.74
  -7  12   0   98.18   11.91
  -7  12  -1   18.13    7.91
  -7  12  -2  134.24   13.34
   7  12   2  147.53   13.84
   7  12   3   46.74    8.86
  -8   0  20  771.30   26.33
  -8   0  19   -7.19    5.17
  -8   0  18   88.26    8.64
  -8   0  17    4.22    4.74
  -8   0  16   56.25    7.06
  -8   0  15   -8.04    4.41
  -8   0  14  573.86   18.93
   8   0 -14  547.44   16.12
  -8   0  13   -2.00    3.66
   8   0 -13   -2.39    2.82
  -8   0  12  607.81   18.84
   8   0 -12  595.74   16.02
  -8   0  11   -1.69    3.29
   8   0 -11    1.02    2.25
   8   0 -10  101.64    6.10
  -8   0  10  101.54    7.38
   8   0  -9    2.57    2.36
  -8   0   9   -1.77    3.47
  -8   0   8  207.49   10.00
   8   0  -8  185.98    8.00
   8   0  -7    1.06    2.14
   8   0  -7    7.45    3.46
  -8   0   7    2.59    3.42
   8   0  -6 1117.09   25.48
  -8   0   6 1081.79   25.03
   8   0  -5    3.14    3.25
  -8   0   5    5.99    3.49
   8   0  -4  439.50   14.74
  -8   0   4  426.04   14.74
  -8   0   3    8.87    4.18
   8   0  -3    2.10    3.08
   8   0  -3   -1.75    3.85
   8   0  -2  105.42    7.32
   8   0  -2  102.00    7.80
   8   0  -1   -0.20    2.98
   8   0  -1   -1.72    3.49
   8   0   0  120.30    8.23
   8   0   0  116.04    8.19
   8   0   1    3.94    3.43
   8   0   1    2.20    3.94
   8   0   2  831.69   23.04
   8   0   2  772.62   22.05
   8   0   3   -3.00    3.77
   8   0   4 1169.12   29.24
   8   0   5    2.23    4.41
   8   0   6  469.99   18.58
   8   0   7    1.92    5.15
   8   0   8   11.27    5.42
   8   0   9    8.16    5.16
   8   0  10  118.07   10.89
   8   0  10   97.21   10.10
   8   0  11    2.11    5.31
   8   0  12  728.98   27.77
   8   0  13  -10.25    6.59
   8   0  14  412.39   21.74
  -8   1  21   46.07    8.08
  -8   1  20    6.45    5.14
  -8   1  19  306.45   16.65
  -8   1  18  237.29   14.26
  -8  -1  18  247.69   13.02
  -8  -1  17   -1.92    3.71
  -8   1  17   -5.67    5.33
  -8   1  16  862.27   26.41
  -8  -1  16  891.26   24.29
  -8  -1  15  406.33   15.31
  -8   1  15  418.13   17.35
  -8  -1  14  352.11   13.76
  -8   1  14  331.86   15.12
   8   1 -14  315.50   13.12
  -8  -1  13   90.18    6.99
  -8   1  13   86.56    7.93
   8   1 -13   81.72    6.66
   8  -1 -13   77.28    5.07
  -8   1  12   95.74    8.12
  -8  -1  12   97.19    7.03
   8   1 -12   82.19    6.53
   8  -1 -12   93.73    5.39
  -8  -1  11   44.94    4.96
  -8   1  11   48.80    6.19
   8   1 -11   49.57    5.03
   8  -1 -11   47.02    3.84
  -8  -1  10  314.09   11.87
   8  -1 -10  322.51    9.47
   8   1 -10  307.39   11.66
  -8   1  10  312.13   13.34
   8  -1  -9   33.73    3.28
   8   1  -9   30.03    4.18
  -8  -1   9   35.14    4.56
  -8   1   9   25.13    4.70
  -8  -1   8  529.39   15.37
   8   1  -8  520.14   15.17
   8  -1  -8  508.83   12.47
  -8   1   8  545.85   17.30
   8   1  -7   56.99    5.07
   8  -1  -7   63.94    4.21
  -8   1   7   60.43    6.11
   8   1  -7   59.61    5.37
  -8  -1   7   58.72    5.40
   8  -1  -7   59.32    6.07
   8   1  -6 1289.09   26.81
   8  -1  -6 1328.85   29.26
  -8   1   6 1256.45   28.49
  -8  -1   6 1299.22   27.11
   8  -1  -5  141.60    8.75
   8   1  -5  143.73    8.03
  -8  -1   5  145.56    8.14
  -8   1   5  130.76    8.59
   8  -1  -4   -3.05    3.43
  -8   1   4    9.98    4.10
   8   1  -4    4.16    3.17
   8  -1  -4    5.23    3.74
  -8   1   3   89.33    7.48
   8   1  -3   92.61    6.69
   8  -1  -3   95.64    7.29
   8  -1  -3   85.65    6.77
   8  -1  -2  698.71   20.04
   8   1  -2  711.43   19.02
   8  -1  -2  699.12   18.94
  -8   1   2  675.37   20.06
   8   1  -2  649.04   20.08
   8  -1  -1   97.28    7.48
   8   1  -1   89.44    7.66
   8   1  -1   99.73    7.06
   8  -1  -1   80.86    6.71
   8   1   0 1503.41   31.57
   8  -1   0 1503.80   32.61
   8   1   0 1502.31   32.76
   8  -1   0 1446.53   30.85
   8   1   1   13.87    3.81
   8  -1   1   19.01    4.28
   8  -1   1   14.62    4.12
   8   1   1   13.77    4.26
   8   1   2  774.65   22.65
   8   1   2  820.83   22.76
   8  -1   2  780.72   21.84
   8   1   3   18.26    4.48
   8  -1   3   18.20    4.88
   8   1   3    8.81    4.23
   8  -1   4   59.28    6.88
   8   1   4   56.63    7.07
   8  -1   5   59.55    7.14
   8   1   5   50.85    6.92
   8  -1   6   40.60    6.42
   8   1   6   46.05    6.81
   8   1   7  126.10   10.42
   8  -1   7  138.99   10.75
   8  -1   7  134.53   10.43
   8  -1   8 1265.83   33.48
   8  -1   8 1234.18   33.40
   8   1   8 1224.41   33.41
   8   1   9    5.40    5.00
   8  -1   9   -1.17    4.93
   8   1  10  138.55   11.60
   8  -1  10  119.52   11.02
   8   1  11   71.75    9.52
   8  -1  11   57.03    8.28
   8   1  12   25.49    6.68
   8  -1  12   26.51    7.11
   8   1  13   15.60    6.64
   8  -1  13   29.10    6.94
   8  -1  14  114.24   12.31
   8   1  14  124.41   12.43
  -8   2  21   -7.31    6.26
  -8   2  20  101.77   11.05
  -8   2  19   53.24    8.01
  -8   2  18  133.03   11.68
  -8   2  17   -2.16    4.82
  -8  -2  17   -1.26    3.21
  -8   2  16   61.09    7.55
  -8  -2  16   56.41    5.87
  -8   2  15  294.04   15.28
  -8  -2  15  336.29   12.83
  -8  -2  14  435.92   14.45
  -8   2  14  397.30   17.34
   8   2 -13  171.10   10.06
  -8  -2  13  171.49    8.64
  -8   2  13  179.97   11.53
  -8  -2  12  307.24   11.33
  -8   2  12  304.89   14.41
   8   2 -12  288.59   12.77
  -8  -2  11  365.33   12.29
  -8   2  11  352.44   15.28
   8   2 -11  351.52   13.74
   8  -2 -11  370.29    8.19
  -8   2  10   10.72    4.12
  -8  -2  10   18.64    3.42
   8   2 -10   13.80    3.83
   8  -2 -10   12.56    1.65
  -8  -2   9  997.83   21.47
   8   2  -9  946.54   23.57
   8  -2  -9  944.89   15.80
  -8   2   9  948.97   25.24
  -8  -2   8  106.59    6.46
   8  -2  -8  102.11    4.13
   8   2  -8  109.49    7.39
  -8   2   8   94.29    7.90
  -8   2   7  546.05   18.07
  -8  -2   7  571.48   15.25
   8   2  -7  533.85   16.48
   8  -2  -7  504.43   11.08
   8   2  -7  535.31   14.71
   8  -2  -7  576.99   18.57
  -8   2   6  294.94   13.03
   8  -2  -6  270.00   10.28
   8   2  -6  277.50   11.50
   8   2  -6  285.72   10.55
   8  -2  -6  286.71   12.82
  -8   2   5   39.43    5.72
   8  -2  -5   39.22    5.36
   8   2  -5   36.63    4.15
   8  -2  -5   34.05    4.14
   8  -2  -4 3018.02   51.74
   8   2  -4 2755.15   46.02
  -8   2   4 2900.48   51.06
   8  -2  -4 2809.54   45.84
   8   2  -3  329.15   11.86
   8  -2  -3  347.86   13.96
  -8   2   3  319.61   13.73
   8  -2  -3  317.18   11.39
   8  -2  -2  570.30   18.45
   8   2  -2  558.55   16.17
  -8   2   2  562.33   18.66
   8  -2  -2  537.12   15.65
   8  -2  -1  431.04   15.91
  -8   2   1  422.10   16.16
   8   2  -1  437.33   14.50
   8   2  -1  411.55   16.08
   8  -2  -1  427.01   14.00
   8  -2   0  166.43   10.08
   8   2   0  162.11    8.96
   8   2   0  171.60   10.63
   8  -2   0  147.49    8.62
   8   2   1 1454.79   31.14
   8   2   1 1426.33   32.76
   8  -2   1 1381.70   29.88
   8   2   2  603.95   18.75
   8   2   2  589.00   19.88
   8  -2   2  564.09   18.00
   8  -2   3   -1.12    3.87
  -8   2  -3    9.79    4.31
   8   2   3   -2.95    4.42
   8   2   4  499.52   18.63
   8  -2   4  503.33   17.64
   8  -2   4  443.99   16.81
   8  -2   5  163.54   10.50
   8  -2   5  148.22    9.96
   8   2   5  169.20   11.32
   8  -2   6  499.21   18.82
   8  -2   6  478.88   18.62
   8   2   6  497.61   19.35
   8  -2   7  154.57   11.20
   8   2   7  163.46   11.80
   8   2   8   42.31    7.27
   8  -2   8   39.80    6.81
   8  -2   9  215.94   13.84
   8   2   9  217.80   14.12
   8  -2  10  269.56   15.79
   8   2  10  255.55   15.57
   8   2  11  146.74   12.26
   8  -2  11  139.60   12.12
   8   2  12  162.57   13.53
   8  -2  12  171.66   13.56
   8   2  13   13.78    6.12
   8  -2  13   13.15    6.75
   8   2  14   44.37    8.59
   8  -2  14   74.23   10.21
  -8   3  20   65.72    9.99
  -8   3  19  159.17   13.35
  -8   3  18  215.47   14.76
  -8   3  17   46.92    7.68
  -8   3  16   57.07    7.81
  -8  -3  15   18.73    3.50
  -8   3  15    9.64    4.77
  -8  -3  14   31.91    4.09
  -8   3  14   21.94    6.03
  -8  -3  13  653.13   16.19
  -8   3  13  611.48   22.32
  -8  -3  12   23.03    3.33
  -8   3  12   11.85    5.12
  -8  -3  11  740.24   17.04
  -8   3  11  715.50   23.20
  -8  -3  10  462.55   12.80
   8   3 -10  471.01   16.89
  -8   3  10  461.06   18.12
   8   3  -9   49.67    5.78
  -8  -3   9   39.79    3.98
  -8   3   9   39.35    6.08
   8  -3  -8  112.45    5.93
  -8   3   8  115.26    9.13
   8   3  -8  121.95    8.27
   8  -3  -7   17.94    2.96
   8   3  -7   16.04    3.03
  -8   3   7   14.14    4.77
   8   3  -7   25.95    4.57
   8  -3  -7   11.05    1.11
  -8   3   6  116.28    8.96
   8  -3  -6  103.61    5.74
   8   3  -6  103.51    5.92
   8   3  -6  109.70    7.85
   8  -3  -6  103.05    3.94
   8   3  -5  864.56   19.39
  -8   3   5  903.35   24.77
   8  -3  -5  922.17   19.29
   8  -3  -5  922.21   16.54
   8   3  -4   34.42    3.90
  -8   3   4   37.28    5.36
   8  -3  -4   46.84    4.23
   8  -3  -4   42.40    3.60
  -8   3   3 1080.55   27.65
   8   3  -3 1069.43   22.98
   8  -3  -3 1098.15   22.38
   8  -3  -3 1091.27   21.15
   8   3  -2  116.97    7.04
  -8   3   2  117.51    9.18
   8  -3  -2  125.52    6.52
   8  -3  -2  116.66    6.83
   8   3  -1  296.80   11.55
  -8   3   1  286.31   13.72
   8  -3  -1  288.54   10.99
   8  -3  -1  287.69   10.61
  -8   3   0   69.07    7.73
   8   3   0   69.55    6.18
   8  -3   0   71.48    6.12
   8   3   0   64.33    7.34
   8  -3   0   72.00    5.88
   8   3   1  512.71   16.51
   8   3   1  518.12   18.94
   8  -3   1  479.70   15.61
   8  -3   1  518.09   16.19
   8   3   2  147.00   10.42
  -8   3  -2  171.81    9.83
   8  -3   2  164.03    9.43
   8  -3   2  165.98    9.43
  -8   3  -3 1989.05   39.60
   8   3   3 1973.91   42.04
   8  -3   3 1904.96   38.75
   8  -3   3 1950.15   38.81
   8   3   4  139.48   10.37
   8  -3   4  119.22    8.98
   8  -3   5  595.44   20.15
   8   3   5  614.95   21.77
   8  -3   6  204.41   12.25
   8   3   6  200.33   12.65
   8   3   7    1.17    4.95
   8  -3   7   14.05    4.89
   8   3   8   37.48    7.01
   8  -3   8   33.02    5.96
   8   3   9  184.06   13.23
   8  -3   9  222.16   14.14
   8   3  10   65.47    9.16
   8  -3  10   69.78    8.86
   8   3  11  121.56   11.56
   8  -3  11  119.10   11.31
   8   3  12   79.47   10.20
   8  -3  12   76.04    9.43
   8   3  13  281.58   17.70
   8  -3  13  281.82   17.77
   8  -3  14  132.41   13.05
  -8   4  19  113.51   11.54
  -8   4  18   -5.59    6.00
  -8   4  17  771.62   28.49
  -8   4  16   19.06    6.06
  -8   4  15  417.04   19.97
  -8   4  14   72.95    8.91
  -8   4  13   33.97    6.75
  -8   4  12    0.72    5.25
  -8   4  11  346.83   16.62
  -8   4  10   20.71    5.80
   8  -4 -10   19.31    2.38
  -8   4   9  141.02   10.55
   8  -4  -9  141.53    5.12
  -8   4   8  227.20   12.85
   8  -4  -8  227.37    6.78
  -8   4   7 1311.85   32.51
   8  -4  -7 1349.58   22.13
   8   4  -6   85.91    4.99
  -8   4   6   82.69    8.27
   8  -4  -6   90.32    4.58
  -8   4   5  336.79   15.06
   8   4  -5  327.33   10.17
   8  -4  -5  338.40    7.76
   8  -4  -5  355.66    9.85
   8   4  -4   -1.28    2.34
  -8   4   4   -7.56    4.81
   8  -4  -4    2.20    2.25
   8  -4  -4    1.24    1.80
   8   4  -3  192.23    8.52
  -8   4   3  189.82   11.34
   8  -4  -3  199.26    8.08
   8  -4  -3  186.26    7.25
  -8   4   2    4.63    5.02
   8   4  -2    7.05    3.12
   8  -4  -2    2.79    2.67
   8  -4  -2    4.17    2.29
   8   4  -1  558.94   16.30
  -8   4   1  560.09   20.17
   8  -4  -1  579.47   15.68
   8  -4  -1  574.61   15.56
   8   4   0   44.92    5.31
  -8   4   0   53.83    7.18
   8  -4   0   56.96    5.49
   8  -4   0   39.60    4.87
   8   4   1  305.28   15.05
  -8   4  -1  291.08   12.40
   8  -4   1  292.98   12.01
   8   4   2   31.02    6.08
  -8   4  -2   34.87    5.19
   8  -4   2   32.32    5.04
   8   4   3  478.91   19.00
  -8   4  -3  490.61   16.90
   8  -4   3  460.71   16.70
   8   4   4   15.85    5.03
   8  -4   4   20.88    4.80
   8   4   5   43.14    7.56
   8  -4   5   43.23    6.61
   8   4   6  106.44   10.08
   8  -4   6   73.78    7.95
   8   4   7  655.05   23.87
   8  -4   7  655.84   22.91
   8  -4   8  252.33   14.53
   8   4   8  254.72   15.08
   8   4   9  547.07   22.59
   8  -4   9  552.96   22.32
   8   4  10    8.43    5.68
   8  -4  10   10.68    5.33
   8  -4  11  202.80   14.38
   8   4  11  188.60   14.25
   8   4  12   71.16    9.93
   8  -4  12   52.63    8.37
   8   4  13    3.95    5.84
   8  -4  13    9.74    6.06
   8   4  14   49.15    8.79
  -8   5  18   57.90    9.16
  -8   5  17    6.34    5.76
  -8   5  16    7.29    5.83
  -8   5  15  130.36   12.07
  -8   5  14   -2.14    5.20
  -8   5  13  769.32   27.15
  -8   5  12   -0.02    4.86
  -8   5  11  934.19   28.95
  -8   5  10    7.58    5.17
  -8   5   9   28.26    6.02
  -8   5   8    2.44    4.50
  -8   5   7  336.61   15.93
   8   5  -6   39.85    3.15
  -8   5   6   39.74    6.66
  -8   5   5  566.38   20.23
   8   5  -5  549.21   12.41
   8  -5  -4    2.36    2.24
   8   5  -4    2.69    2.29
  -8   5   4   -4.19    4.42
  -8   5   3  273.68   14.09
   8   5  -3  260.09    9.45
   8  -5  -3  279.55    8.78
   8   5  -2   55.43    4.92
  -8   5   2   50.76    7.07
   8  -5  -2   56.44    4.50
  -8   5   1  447.13   18.50
   8   5  -1  472.99   14.54
   8  -5  -1  466.44   13.87
  -8   5   0   64.75    8.27
  -8   5   0   57.09    5.42
   8  -5   0   59.77    5.35
  -8   5  -1   29.72    6.41
  -8   5  -1   32.02    4.87
   8   5   1   27.50    6.04
   8  -5   1   31.61    4.83
  -8   5  -2  253.95   11.75
   8   5   2  289.79   15.00
   8  -5   2  265.73   12.09
  -8   5  -3  892.48   23.99
   8   5   3  906.05   27.55
   8  -5   3  909.88   24.40
   8   5   4    6.77    4.82
   8  -5   4    3.18    4.08
   8   5   5  666.46   23.85
   8  -5   5  693.71   22.35
   8   5   6   -1.89    5.27
   8  -5   6    8.26    4.36
   8  -5   7  631.20   22.77
   8   5   7  612.64   23.50
   8   5   8   64.91    8.89
   8  -5   8   59.25    8.37
   8   5   9   10.36    5.69
   8  -5   9   15.66    6.34
   8   5  10    1.04    5.60
   8  -5  10    2.56    5.14
   8  -5  11  282.42   17.35
   8   5  11  288.15   17.74
   8   5  12  137.83   12.97
   8  -5  12  143.56   12.81
   8  -5  13  530.21   24.87
   8   5  13  525.97   24.63
  -8   6  16   22.36    6.60
  -8   6  15  177.68   14.32
  -8   6  14  489.69   22.66
  -8   6  13  465.80   21.66
  -8   6  12   96.29   10.49
  -8   6  11   47.67    7.91
  -8   6  10   -1.84    5.13
  -8   6   9 1047.67   31.35
  -8   6   8   17.70    5.80
  -8   6   7  948.12   28.78
  -8   6   6  181.65   12.36
  -8   6   5   34.79    6.37
   8   6  -5   36.52    2.82
   8  -6  -4    2.09    1.75
   8   6  -4    3.52    2.41
  -8   6   4    6.11    4.64
   8   6  -3   98.72    5.74
   8  -6  -3   88.93    5.11
  -8   6   3   93.85    9.19
   8  -6  -2   14.48    2.94
   8   6  -2    4.66    2.81
  -8   6   2   17.17    6.08
  -8   6   1  702.64   24.51
   8   6  -1  747.75   18.90
   8  -6  -1  762.21   18.65
  -8   6   0    8.93    5.25
  -8   6   0    2.45    3.25
   8  -6   0    8.89    3.12
  -8   6  -1  636.18   23.30
  -8   6  -1  637.83   18.23
   8  -6   1  657.84   18.90
   8   6   2   -1.27    4.74
  -8   6  -2    0.83    3.15
   8  -6   2   -0.28    3.30
  -8   6  -3  156.05    9.67
   8   6   3  166.19   12.08
   8  -6   3  153.41    9.76
   8   6   4    2.84    5.25
   8  -6   4   -1.99    3.90
   8   6   5  304.55   16.29
   8  -6   5  306.92   14.91
   8   6   6  141.94   11.71
   8  -6   6  156.40   11.16
   8  -6   7  760.66   25.67
   8   6   7  730.00   26.39
   8   6   8   27.98    7.19
   8  -6   8   46.26    7.47
   8  -6   9  360.83   18.31
   8   6   9  331.54   18.44
   8   6  10   70.31    9.10
   8  -6  10   75.77    9.37
   8   6  11   11.35    6.30
   8  -6  11   12.32    6.57
   8   6  12   45.64    8.91
   8  -6  12   73.53   10.34
  -8   7  15   75.54   10.28
  -8   7  14  167.82   13.93
  -8   7  13   98.31   11.15
  -8   7  12   91.58   10.31
  -8   7  11  146.40   12.78
  -8   7  10  136.64   11.90
  -8   7   9  239.31   15.13
  -8   7   8  445.77   20.13
  -8   7   7   46.87    8.17
  -8   7   6  312.96   16.69
  -8   7   5 1040.44   30.99
  -8   7   4   13.41    5.87
  -8   7   3  662.57   24.40
   8   7  -3  713.69   15.83
   8  -7  -3  713.55   15.82
  -8   7   2  491.90   20.82
   8   7  -2  482.27   13.84
   8  -7  -2  513.37   14.18
   8  -7  -1   21.08    3.85
  -8   7   1   18.27    5.89
  -8   7   0  475.48   20.75
  -8   7   0  460.02   14.57
   8  -7   0  497.27   15.72
  -8   7  -1    2.64    3.42
   8  -7   1    9.25    4.09
  -8   7  -1   15.38    5.87
  -8   7  -2  157.43   12.41
  -8   7  -2  150.45    9.15
   8   7   2  160.85   12.31
   8  -7   2  161.71    9.90
   8   7   3  246.79   15.08
   8  -7   3  251.38   12.76
   8   7   4    7.54    5.30
   8  -7   4   10.04    5.04
   8   7   5  797.15   27.65
   8  -7   5  767.22   24.89
   8   7   6  281.68   16.19
   8  -7   6  266.34   14.92
   8   7   7   85.31    9.67
   8  -7   7   82.07    9.21
   8  -7   8  634.35   24.39
   8   7   8  630.15   25.31
   8   7   9   58.02    8.79
   8  -7   9   48.60    8.30
   8   7  10   42.61    8.53
   8  -7  10   43.70    7.78
   8   7  11   62.68    9.13
   8  -7  11   61.47    9.24
   8   7  12   36.66    7.95
  -8   8  13   23.34    7.36
  -8   8  12  604.87   26.11
  -8   8  11  227.95   15.75
  -8   8  10  622.26   25.70
  -8   8   9  108.38   10.94
  -8   8   8    1.21    5.39
  -8   8   7  131.30   11.77
  -8   8   6  331.74   17.70
  -8   8   5   -0.03    5.48
  -8   8   4  763.87   27.01
   8  -8  -3   22.31    3.21
  -8   8   3    4.32    4.99
  -8   8   2  841.16   28.49
   8  -8  -2  880.33   20.18
   8  -8  -1   -2.32    2.67
  -8   8   1    0.64    5.36
   8  -8   0   98.41    7.29
  -8   8   0   75.80    9.10
   8  -8   1   10.09    4.17
  -8   8  -1    9.07    5.14
  -8   8  -2  450.43   21.02
   8   8   2  467.78   21.05
   8  -8   2  448.47   16.84
   8   8   3   13.97    6.55
   8  -8   3    7.23    4.37
   8   8   4  805.38   28.19
   8  -8   4  786.98   24.86
   8   8   5   13.01    5.82
   8  -8   5    6.14    4.24
   8   8   6   48.37    8.27
   8  -8   6   60.95    7.73
   8   8   7    6.57    5.54
   8  -8   7   -0.09    5.30
   8   8   8   -3.18    6.12
   8  -8   8   16.07    6.07
   8   8   9   58.63    9.03
   8  -8   9   51.63    8.86
   8   8  10   42.88    8.42
   8  -8  10   43.56    8.67
   8   8  11   74.35   10.64
  -8   9  11   35.99    7.73
  -8   9  10  339.39   19.53
  -8   9   9   40.65    7.58
  -8   9   8  253.88   16.52
  -8   9   7   63.92    8.92
  -8   9   6  136.46   12.62
  -8   9   5    6.41    5.77
  -8   9   4   20.91    5.57
  -8   9   3   37.23    7.75
  -8   9   2  244.87   16.09
  -8   9   1    1.16    5.49
  -8   9   0  273.88   17.00
   8  -9   0  279.57   12.34
   8  -9   1    8.86    4.05
  -8   9  -1   24.24    7.10
  -8   9  -2  229.46   15.76
   8   9   2  269.70   16.62
   8  -9   2  244.17   12.97
   8   9   3   11.26    6.23
   8  -9   3    7.93    4.00
   8   9   4    4.50    5.35
   8  -9   4    4.91    4.41
   8   9   5   17.85    6.90
   8  -9   5   24.97    6.14
   8   9   6   30.25    8.10
   8  -9   6   20.87    5.60
   8   9   7    0.58    5.17
   8  -9   7   -0.48    4.80
   8  -9   8  403.08   20.31
   8   9   8  385.19   20.55
   8   9   9   -2.00    5.28
   8  -9   9   -2.28    5.03
  -8  10   8    1.46    6.06
  -8  10   7   65.71    9.50
  -8  10   6  128.73   12.63
  -8  10   5  112.74   11.52
  -8  10   4  749.90   28.81
  -8  10   3   15.16    6.45
  -8  10   2  194.33   14.61
  -8  10   1   19.40    6.34
  -8  10   0    3.90    6.03
  -8  10  -1    7.29    6.04
   8  10   2   45.28    8.96
  -8  10  -2   26.44    7.10
   8  10   3    9.52    5.69
   8 -10   3    0.90    4.15
   8  10   4  336.28   19.02
   8 -10   4  311.95   16.19
   8  10   5  -12.26    6.48
   8 -10   5   12.82    4.93
   8  10   6  438.82   21.98
   8 -10   6  477.09   21.47
   8  10   7   19.38    7.81
   8 -10   7   14.34    6.03
   8 -10   8   13.43    5.46
  -8  11   3   84.50   10.76
  -8  11   2  237.74   16.95
  -8  11   1    8.30    6.89
  -8  11   0  922.11   34.00
   8  11   1   -0.91    6.70
  -8  11  -1   -6.22    6.65
   8  11   2  429.43   22.21
   8  11   3    4.22    6.02
  -9   0  19   -2.20    4.83
  -9   0  18  755.71   24.87
  -9   0  17   -0.58    4.19
  -9   0  16  194.88   11.68
  -9   0  15    0.27    3.80
  -9   0  14    8.59    4.10
  -9   0  13   -2.86    3.89
   9   0 -12  176.90    8.38
  -9   0  12  172.38   10.27
   9   0 -11   -0.10    2.30
  -9   0  11    2.93    4.08
  -9   0  10  554.84   17.89
   9   0 -10  524.29   14.71
   9   0  -9   -0.61    2.33
  -9   0   9   -4.12    3.85
  -9   0   8  695.45   19.97
   9   0  -8  667.15   17.08
   9   0  -7   -0.98    2.25
   9   0  -7    7.97    3.71
  -9   0   7    1.47    3.68
  -9   0   6   -2.05    3.96
   9   0  -6    1.92    3.29
   9   0  -5    4.23    3.56
  -9   0   5    3.16    3.66
   9   0  -4  365.10   14.25
  -9   0   4  371.83   14.66
   9   0  -4  349.69   14.41
   9   0  -3   -3.23    3.21
   9   0  -3    0.87    3.96
   9   0  -2  387.89   14.87
   9   0  -2  341.74   14.41
   9   0  -1    2.86    3.27
   9   0  -1   -0.39    5.35
   9   0   0  490.69   17.51
   9   0   1    1.02    4.34
   9   0   2 1041.61   27.59
   9   0   3    2.50    4.10
   9   0   4  294.74   14.60
   9   0   5   -0.88    4.51
   9   0   6  800.62   25.93
   9   0   7   -0.04    4.97
   9   0   8  615.35   23.63
   9   0   9   -3.35    4.94
   9   0  10  150.02   12.58
   9   0  10  139.25   12.35
   9   0  11   -3.75    5.97
   9   0  12   61.35    9.55
   9   0  13    1.43    5.49
  -9   1  20  198.30   13.79
  -9   1  19    2.96    4.67
  -9   1  18    4.13    4.77
  -9  -1  17   34.26    5.77
  -9   1  17   31.04    6.45
  -9  -1  16  203.05   11.36
  -9   1  16  193.35   12.22
  -9  -1  15   87.75    7.48
  -9   1  15   62.78    7.65
  -9  -1  14  746.08   21.37
  -9   1  14  738.46   23.60
   9   1 -13  124.04    7.95
  -9   1  13  116.01    9.17
  -9  -1  13  132.06    8.63
  -9  -1  12  771.30   20.99
   9   1 -12  710.11   19.87
   9  -1 -12  745.28   16.66
  -9   1  12  715.87   22.38
  -9  -1  11  495.08   16.11
   9  -1 -11  479.35   12.41
   9   1 -11  448.54   15.08
  -9   1  11  456.08   17.21
   9   1 -10    9.04    3.10
   9  -1 -10    9.57    2.37
  -9   1  10   15.47    4.84
  -9  -1  10   11.09    3.87
   9  -1  -9    2.45    1.99
   9   1  -9   -4.87    2.80
  -9   1   9   -1.64    3.83
  -9  -1   9   -3.19    3.49
   9   1  -8   -0.86    2.48
   9  -1  -8   -5.09    2.16
  -9  -1   8   -0.32    3.32
  -9   1   8    2.28    3.90
   9  -1  -7   43.52    4.08
   9   1  -7   44.18    5.02
   9  -1  -7   43.33    5.67
  -9  -1   7   43.23    5.34
   9   1  -7   51.80    5.70
  -9   1   7   47.85    6.30
   9   1  -6  731.60   20.23
   9  -1  -6  789.37   22.52
  -9   1   6  769.57   22.17
  -9  -1   6  765.10   20.66
   9   1  -5   84.37    6.75
   9  -1  -5   88.09    7.52
  -9   1   5   72.02    7.09
   9  -1  -5   81.68    7.18
   9   1  -4  394.95   14.37
   9  -1  -4  406.72   15.59
  -9   1   4  391.66   15.61
   9  -1  -4  385.70   14.41
   9   1  -3   20.14    4.19
  -9   1   3   16.09    5.09
   9  -1  -3   26.43    4.91
   9  -1  -3   22.58    4.69
   9   1  -2    3.11    3.30
   9  -1  -2   -2.19    3.81
   9   1  -2   -0.49    3.97
   9  -1  -1  133.07    8.90
   9   1  -1  155.18    9.43
   9   1  -1  134.45    9.54
   9   1   0  439.25   16.92
   9   1   0  443.72   16.11
   9  -1   0  427.14   15.87
   9  -1   1   22.26    5.25
   9   1   1   15.68    4.64
   9   1   2  974.86   26.96
   9  -1   2  948.06   25.66
   9  -1   3    1.22    3.99
   9   1   3    2.85    4.60
   9  -1   4  814.29   24.61
   9   1   4  846.84   25.69
   9  -1   5  104.29    9.57
   9   1   5   94.98    9.20
   9  -1   6   64.68    7.96
   9   1   6   68.44    8.30
   9  -1   7  100.88    9.73
   9   1   7   83.36    9.16
   9  -1   7   85.31    9.08
   9  -1   8  352.64   17.57
   9  -1   8  327.63   17.08
   9   1   8  325.35   17.20
   9  -1   9  487.49   21.54
   9   1   9  526.43   22.36
   9  -1  10  498.36   22.32
   9   1  10  516.89   22.71
   9   1  11   36.66    7.47
   9  -1  11   41.50    7.93
   9  -1  12  252.31   16.83
   9   1  12  270.83   17.52
   9   1  13  138.55   13.13
   9  -1  13  151.94   13.42
  -9   2  21  289.78   18.04
  -9   2  20    8.09    5.42
  -9   2  19   39.71    7.68
  -9   2  18  111.51   10.88
  -9   2  17   38.24    7.24
  -9   2  16  342.11   17.12
  -9  -2  15   86.10    6.99
  -9   2  15   81.38    8.73
  -9  -2  14  148.16    8.68
  -9   2  14  138.21   10.54
  -9  -2  13  133.22    7.98
  -9   2  13  140.40   10.74
  -9  -2  12  214.61    9.90
  -9   2  12  196.32   12.03
   9   2 -12  194.61   10.67
  -9   2  11   17.02    5.15
  -9  -2  11   11.12    3.39
   9   2 -11   19.94    4.40
   9  -2 -11   15.07    2.00
  -9  -2  10  472.86   14.85
   9   2 -10  421.60   15.53
   9  -2 -10  458.99    9.83
  -9   2  10  445.04   17.38
   9  -2  -9   68.99    3.69
   9   2  -9   68.70    6.23
  -9   2   9   70.64    7.44
  -9  -2   9   75.21    6.18
  -9  -2   8  416.13   13.84
  -9   2   8  397.27   16.19
   9   2  -8  406.61   14.83
   9  -2  -8  408.83   10.00
  -9   2   7  807.69   23.22
   9  -2  -7  767.57   19.46
   9  -2  -7  738.07   15.48
   9   2  -7  750.23   21.03
   9   2  -7  778.89   19.67
   9   2  -6  259.66   10.87
  -9   2   6  243.52   12.42
   9  -2  -6  258.29   10.63
   9   2  -5  439.93   14.45
  -9   2   5  444.35   17.05
   9  -2  -5  457.94   14.40
   9   2  -4  153.65    8.59
  -9   2   4  148.69   10.13
   9  -2  -4  167.30    8.78
   9   2  -3    8.68    3.44
  -9   2   3    7.81    4.90
   9  -2  -3    4.87    3.48
   9   2  -2 1817.20   39.32
   9   2  -2 1825.77   35.94
  -9   2   2 1755.34   38.79
   9  -2  -2 1833.99   35.25
   9   2  -1   13.46    3.68
   9   2  -1   12.85    5.03
   9  -2  -1   16.76    4.33
   9   2   0  960.32   24.76
   9   2   0  946.32   26.71
   9  -2   0  931.93   23.99
   9   2   1  107.57    8.35
   9  -2   1   83.22    7.23
   9   2   1  100.75    8.94
   9  -2   2    1.19    3.82
   9   2   2   11.82    5.42
   9   2   3  811.04   25.21
   9  -2   3  791.21   23.34
   9  -2   4  183.94   11.45
   9  -2   4  190.31   11.59
   9   2   4  204.52   12.66
   9  -2   5    4.39    4.98
   9   2   5   -1.32    4.87
   9  -2   5    8.60    4.64
   9  -2   6  580.41   21.21
   9  -2   6  517.50   20.38
   9   2   6  572.82   22.03
   9  -2   7  252.39   14.50
   9   2   7  238.17   14.69
   9   2   8   49.92    7.83
   9  -2   8   44.74    7.49
   9  -2   9  242.07   15.34
   9   2   9  236.83   15.33
   9   2  10    5.89    5.29
   9  -2  10    2.99    5.59
   9   2  11   71.42    9.56
   9  -2  11   87.45   10.37
   9   2  12  116.14   11.99
   9  -2  12  135.06   12.98
   9   2  13   34.49    8.27
   9  -2  13   51.42    9.51
  -9   3  20  140.12   13.17
  -9   3  19  154.35   13.07
  -9   3  18    6.66    5.73
  -9   3  17  219.83   14.86
  -9   3  16  186.81   13.39
  -9   3  15  239.31   14.58
  -9   3  14  132.73   10.91
  -9  -3  13    2.22    2.69
  -9   3  13    4.76    4.46
  -9   3  12  133.66   10.77
  -9  -3  12  157.74    7.94
  -9   3  11  833.09   26.01
  -9  -3  11  863.50   19.93
  -9   3  10   11.60    5.00
  -9   3   9  973.86   27.64
   9  -3  -9  992.63   21.19
  -9   3   8   58.61    7.20
   9  -3  -8   62.41    4.89
  -9   3   7  408.63   16.88
   9  -3  -7  435.06   12.57
   9   3  -7  421.13   12.91
   9  -3  -7  419.08    8.60
   9   3  -6  161.01    8.09
  -9   3   6  160.79   10.70
   9  -3  -6  173.78    7.94
   9  -3  -6  170.74    6.28
  -9   3   5    2.56    4.40
   9   3  -5    1.19    2.68
   9  -3  -5    1.67    2.84
   9  -3  -5    0.90    2.04
   9   3  -4   18.56    3.61
  -9   3   4   15.66    4.89
   9  -3  -4   23.05    3.98
   9  -3  -4   15.88    3.02
  -9   3   3  643.56   21.82
   9   3  -3  660.97   18.25
   9  -3  -3  657.29   16.30
   9  -3  -3  646.81   17.23
  -9   3   2   27.39    5.96
   9   3  -2   28.40    4.68
   9  -3  -2   29.44    4.36
   9  -3  -2   33.40    4.30
  -9   3   1 1219.33   31.61
   9   3  -1 1256.98   28.21
   9   3  -1 1261.94   32.15
   9  -3  -1 1220.29   27.04
   9  -3  -1 1186.71   26.09
   9   3   0   53.83    5.95
   9   3   0   44.27    6.64
   9  -3   0   46.05    5.35
   9  -3   0   53.90    5.73
   9   3   1  534.27   18.05
   9   3   1  516.67   19.90
   9  -3   1  498.52   16.78
   9  -3   1  538.36   17.54
   9  -3   2   12.70    4.47
   9   3   2    1.11    4.53
   9  -3   2   10.74    4.13
   9   3   3  195.03   12.40
   9  -3   3  182.21   11.01
   9  -3   3  189.52   11.12
   9   3   4  125.37   10.65
   9  -3   4  134.55    9.63
   9  -3   4  114.28    8.92
   9  -3   5  792.22   25.02
   9   3   5  855.81   27.16
   9  -3   6  185.61   12.11
   9   3   6  186.53   12.91
   9  -3   7  581.70   22.15
   9   3   7  593.99   23.34
   9   3   8   53.22    8.17
   9  -3   8   59.05    8.30
   9   3   9   17.35    6.84
   9  -3   9   12.65    5.86
   9   3  10   20.17    6.73
   9  -3  10   19.34    6.36
   9   3  11   -0.42    5.42
   9  -3  11    2.27    5.43
   9   3  12   96.50   11.58
   9  -3  12  107.58   11.51
  -9   4  18   10.96    5.99
  -9   4  17    5.50    6.22
  -9   4  16   -1.45    5.04
  -9   4  15  369.40   18.82
  -9   4  14   36.55    6.79
  -9   4  13 1295.53   35.72
  -9   4  12   53.95    8.07
  -9   4  11   41.93    7.49
   9  -4 -11   35.00    3.11
  -9   4  10   17.71    6.13
   9  -4 -10   17.49    2.49
  -9   4   9  511.27   20.09
   9  -4  -9  527.35   12.22
  -9   4   8    3.17    4.41
   9  -4  -8    2.45    2.23
   9   4  -7  214.70    8.49
  -9   4   7  230.17   13.32
   9  -4  -7  240.57    8.03
   9   4  -6   12.13    2.97
  -9   4   6   12.90    4.96
   9  -4  -6   12.03    2.62
   9  -4  -6    9.17    1.52
  -9   4   5  220.13   13.02
   9   4  -5  205.59    8.85
   9  -4  -5  229.37    7.11
   9  -4  -5  226.84    8.57
   9   4  -4   18.66    3.65
  -9   4   4   25.31    6.13
   9  -4  -4   24.64    3.59
   9  -4  -4   24.74    3.03
  -9   4   3 1210.94   32.34
   9   4  -3 1247.82   26.54
   9  -4  -3 1302.90   25.77
   9  -4  -3 1291.73   24.63
  -9   4   2   11.52    5.44
   9   4  -2    3.64    3.06
   9  -4  -2    0.41    2.76
   9  -4  -2    1.28    2.71
  -9   4   1   38.55    6.64
   9   4  -1   18.03    3.93
   9  -4  -1   29.75    4.43
   9  -4  -1   26.47    4.17
  -9   4   0   26.92    6.19
   9   4   0   36.06    5.25
   9  -4   0   37.20    5.19
   9   4   0   44.71    7.39
   9  -4   0   35.19    4.60
   9   4   1  934.96   24.53
   9   4   1  939.51   28.36
   9  -4   1  901.64   23.59
   9   4   2   -5.29    5.05
  -9   4  -2   -1.71    3.64
   9  -4   2   -0.76    3.43
   9   4   3  418.01   18.55
   9  -4   3  419.19   16.45
   9   4   4   87.98    9.41
   9  -4   4   79.81    8.13
   9   4   5  267.22   15.23
   9  -4   5  263.32   14.17
   9   4   6   13.16    6.02
   9  -4   6    0.93    4.48
   9   4   7   42.48    7.36
   9  -4   7   41.18    7.03
   9   4   8   89.93   10.42
   9  -4   8   77.87    9.03
   9   4   9  340.89   18.58
   9  -4   9  310.94   17.15
   9   4  10   59.23    9.16
   9  -4  10   68.84    9.21
   9  -4  11  753.21   28.75
   9   4  11  729.82   28.72
   9   4  12   23.09    7.33
   9  -4  12   24.93    6.95
  -9   5  17  170.08   14.04
  -9   5  16  118.71   11.88
  -9   5  15    3.90    5.62
  -9   5  14    2.06    5.07
  -9   5  13  157.65   12.68
  -9   5  12   -5.76    5.22
  -9   5  11  392.77   18.83
  -9   5  10   68.11    8.52
  -9   5   9  489.01   20.36
  -9   5   8  173.71   12.11
  -9   5   7  139.33   11.04
  -9   5   6    2.25    4.63
   9   5  -6    1.24    2.14
  -9   5   5  223.16   13.49
   9  -5  -5  187.11    5.56
   9   5  -5  193.15    8.06
   9  -5  -4   85.89    4.66
   9   5  -4   78.52    5.55
  -9   5   4   91.77    9.14
  -9   5   3  440.62   19.02
   9   5  -3  417.54   13.40
   9  -5  -3  450.70   12.34
  -9   5   2   66.98    8.34
   9   5  -2   61.67    5.54
   9  -5  -2   65.28    5.15
  -9   5   1  269.77   15.26
   9   5  -1  276.97   11.82
   9  -5  -1  278.64   11.03
  -9   5   0   41.33    7.47
   9   5   0   18.82    4.21
   9   5   0   32.37    6.95
   9  -5   0   27.01    4.57
   9   5   1  495.21   17.14
   9   5   1  529.02   21.35
   9  -5   1  514.80   17.14
   9   5   2    2.49    5.38
  -9   5  -2    5.96    3.92
   9  -5   2   -2.77    3.77
   9   5   3   19.02    6.54
   9  -5   3    9.71    4.00
   9   5   4   59.86    8.13
   9  -5   4   66.75    7.51
   9   5   5  462.21   20.50
   9  -5   5  444.10   18.44
   9   5   6    3.33    5.06
   9  -5   6    6.49    5.14
   9  -5   7  962.35   29.96
   9   5   7 1026.33   32.42
   9   5   8   31.55    7.26
   9  -5   8   37.55    7.23
   9  -5   9  297.32   17.06
   9   5   9  295.87   17.72
   9   5  10    6.33    6.14
   9  -5  10    5.59    5.91
   9   5  11   17.89    6.98
   9  -5  11   10.94    5.58
   9  -5  12    7.88    7.04
  -9   6  15  293.61   18.04
  -9   6  14   25.72    7.12
  -9   6  13  276.06   17.02
  -9   6  12  170.05   13.50
  -9   6  11  445.47   20.85
  -9   6  10   40.01    7.47
  -9   6   9  120.10   11.12
  -9   6   8   -4.46    5.38
  -9   6   7  972.22   30.26
  -9   6   6   -3.58    5.26
  -9   6   5 1160.32   31.36
   9  -6  -5  740.61   12.10
   9  -6  -4   45.50    3.36
   9   6  -4   35.44    3.91
  -9   6   4   32.39    6.44
   9   6  -3  284.22   10.45
  -9   6   3  269.55   15.49
   9  -6  -3  277.92    9.40
  -9   6   2   32.95    6.94
   9   6  -2   32.93    4.51
   9  -6  -2   34.88    4.14
   9   6  -1   47.04    5.41
  -9   6   1   36.80    7.47
   9  -6  -1   48.19    4.92
   9  -6   0   86.76    6.89
   9   6   0   89.52    7.36
  -9   6   0  101.82   10.50
  -9   6  -1  404.49   15.34
   9   6   1  419.21   19.82
   9  -6   1  419.92   15.45
  -9   6  -2   80.69    7.71
   9   6   2   67.88    8.25
   9  -6   2   89.39    7.40
   9   6   3  964.25   30.46
   9  -6   3  937.35   26.20
   9   6   4   58.88    8.28
   9  -6   4   63.19    7.56
   9   6   5  318.98   17.37
   9  -6   5  276.22   14.65
   9   6   6   91.92   10.59
   9  -6   6   91.74    9.18
   9   6   7   55.65    8.92
   9  -6   7   60.58    7.87
   9   6   8  152.14   12.85
   9  -6   8  171.28   12.84
   9  -6   9  187.02   14.06
   9   6   9  162.75   13.62
   9   6  10   49.32    8.39
   9  -6  10   43.37    7.79
   9   6  11  150.76   13.85
   9  -6  11  176.64   14.23
  -9   7  14  308.28   18.99
  -9   7  13   38.56    7.90
  -9   7  12  274.28   17.49
  -9   7  11  435.39   21.63
  -9   7  10   12.57    6.45
  -9   7   9  403.36   19.86
  -9   7   8  190.27   13.91
  -9   7   7   47.90    7.97
  -9   7   6  911.83   30.04
  -9   7   5   15.11    6.18
  -9   7   4  471.09   20.84
  -9   7   3  572.20   23.28
   9  -7  -3  585.57   14.58
   9  -7  -2   44.30    4.51
  -9   7   2   37.02    7.11
  -9   7   1 1157.42   34.84
   9  -7  -1 1202.41   26.08
  -9   7   0  249.65   15.92
   9  -7   0  236.91   11.03
   9   7   1    3.87    5.82
   9  -7   1    0.29    3.32
  -9   7  -1    4.12    5.00
   9   7   2  687.77   26.05
   9  -7   2  650.78   20.85
   9   7   3  179.45   13.72
   9  -7   3  190.43   11.31
   9   7   4   77.26    9.79
   9  -7   4   76.36    7.75
   9   7   5   77.71    9.29
   9  -7   5   80.68    8.56
   9   7   6   15.13    6.56
   9  -7   6    7.90    4.75
   9  -7   7  284.96   16.27
   9   7   7  281.09   17.43
   9   7   8   61.49    9.16
   9  -7   8   44.69    7.72
   9   7   9   31.49    7.56
   9  -7   9   23.54    6.73
   9  -7  10  122.76   12.04
  -9   8  11    4.81    6.15
  -9   8  10  564.15   24.94
  -9   8   9   83.39   10.11
  -9   8   8  509.27   23.32
  -9   8   7   47.84    8.30
  -9   8   6   18.43    6.54
  -9   8   5   -5.27    5.91
  -9   8   4  472.51   21.82
  -9   8   3   27.36    6.76
  -9   8   2  664.45   26.30
   9  -8  -1   -1.38    2.75
  -9   8   1   -6.05    5.51
  -9   8   0  191.50   14.56
   9  -8   0  198.65   10.43
   9   8   1    8.95    6.58
   9  -8   1    0.99    3.13
  -9   8  -1   10.36    6.48
   9   8   2    6.61    6.12
   9  -8   2   -2.39    3.68
   9   8   3   48.37    8.64
   9  -8   3   29.63    6.02
   9   8   4  208.68   14.73
   9  -8   4  186.69   12.38
   9   8   5  161.33   13.65
   9  -8   5  143.86   11.30
   9   8   6  564.12   24.55
   9  -8   6  543.56   22.21
   9   8   7    3.86    6.01
   9  -8   7    3.93    5.11
   9   8   8   73.36   10.07
   9  -8   8   91.29   10.39
   9  -8   9   28.96    7.35
  -9   9   9   26.04    7.03
  -9   9   8   95.72   11.02
  -9   9   7   -5.82    6.28
  -9   9   6  215.17   15.87
  -9   9   5   13.07    6.68
  -9   9   4  373.34   19.94
  -9   9   3   -0.79    5.35
  -9   9   2  141.88   12.87
  -9   9   1    7.80    6.54
  -9   9   0  110.80   12.00
   9   9   1   37.40    8.42
  -9   9  -1   47.65    9.95
   9   9   2  292.34   18.04
   9  -9   2  303.89   14.61
   9   9   3   28.71    7.85
   9  -9   3   33.44    6.23
   9   9   4  440.85   21.88
   9  -9   4  406.89   18.36
   9   9   5    3.78    6.24
   9  -9   5   14.14    5.50
   9   9   6  222.54   16.35
   9  -9   6  198.88   13.80
   9  -9   7   29.24    7.49
   9  -9   8   31.05    7.28
  -9  10   4   49.55    9.22
  -9  10   3   -2.54    5.41
  -9  10   2  720.61   29.42
  -9  10   1   13.68    6.58
  -9  10   0  552.23   25.80
   9  10   1   84.20   10.61
  -9  10  -1   93.99   11.72
   9  10   2   -0.97    5.74
 -10   0  18  268.57   14.68
 -10   0  17    2.83    4.23
 -10   0  16  991.31   28.25
 -10   0  15   -0.48    4.19
 -10   0  14  140.30   10.12
 -10   0  13   -5.16    3.74
 -10   0  12   22.09    5.02
  10   0 -11   -1.91    2.59
 -10   0  11    1.86    3.73
  10   0 -10   -0.36    2.43
 -10   0  10   -6.41    4.19
  10   0  -9    2.41    2.67
 -10   0   9    2.01    3.92
 -10   0   8  280.94   13.37
  10   0  -8  259.74   10.66
 -10   0   7   -5.80    4.53
 -10   0   6  543.04   18.79
 -10   0   5    2.47    4.21
  10   0  -5    0.41    3.91
  10   0  -4  134.97    9.67
  10   0  -3    3.35    4.45
  10   0  -2  306.92   14.33
  10   0  -1    2.34    3.92
  10   0   0  148.20   10.42
  10   0   1    3.04    4.57
  10   0   2 1208.72   31.48
  10   0   3    2.77    4.76
  10   0   4 1632.16   39.29
  10   0   5    5.00    4.75
  10   0   6    1.16    5.03
  10   0   7  -12.76    6.17
  10   0   8  914.02   30.38
  10   0   9  -15.35    6.63
  10   0   9    8.34    6.16
  10   0  10  961.40   32.68
  10   0  10  935.57   32.39
  10   0  11   11.65    6.66
  10   0  12   29.13    7.19
 -10   1  19  159.21   12.67
 -10   1  18  265.52   15.47
 -10   1  17   44.15    7.23
 -10  -1  16   30.69    5.23
 -10   1  16   30.71    6.42
 -10  -1  15    9.99    4.00
 -10   1  15   10.52    4.94
 -10  -1  14    4.78    3.86
 -10   1  14    3.00    4.00
 -10   1  13    7.25    4.30
 -10  -1  13   17.04    4.68
 -10   1  12  504.63   19.26
 -10  -1  12  538.05   17.96
 -10  -1  11  109.32    8.06
  10   1 -11  103.67    7.47
 -10   1  11  105.91    9.07
 -10  -1  10 1282.64   29.35
 -10   1  10 1245.35   31.16
  10   1 -10 1194.35   27.48
  10  -1 -10 1213.06   23.73
 -10  -1   9  150.98    9.55
 -10   1   9  137.45    9.76
  10  -1  -9  150.63    7.16
  10   1  -9  154.52    8.84
 -10   1   8  138.75    9.99
 -10  -1   8  144.65    9.43
  10   1  -8  142.63    8.58
  10  -1  -8  157.01    7.45
  10   1  -8  140.04    9.09
  10   1  -7    0.64    2.65
  10   1  -7    1.66    3.15
 -10  -1   7   11.08    4.59
 -10   1   7    5.10    4.64
  10   1  -6  179.75   10.32
 -10   1   6  174.30   11.05
  10  -1  -6  175.29   10.20
  10   1  -5   18.52    4.06
 -10   1   5   26.73    5.71
  10  -1  -5   28.19    4.97
  10   1  -4  534.86   18.10
  10   1  -4  519.82   19.31
 -10   1   4  513.56   19.00
  10  -1  -4  533.00   17.78
  10   1  -3    1.03    3.47
  10   1  -3   -0.85    4.24
  10  -1  -3   -3.45    4.00
  10  -1  -2 1196.32   28.98
  10   1  -2 1200.61   30.89
  10   1  -1  123.80    9.70
  10  -1  -1  140.42    9.56
  10  -1   0  103.27    8.81
  10   1   0  101.13    9.10
  10  -1   1   53.53    7.03
  10   1   1   50.80    7.15
  10  -1   2    7.61    8.13
  10   1   2    6.38    5.10
  10  -1   3  210.71   12.52
  10   1   3  196.59   12.74
  10  -1   4  775.99   25.10
  10   1   4  736.83   25.15
  10  -1   5   11.93    5.55
  10   1   5   -4.40    4.77
  10   1   6  841.34   28.04
  10  -1   6  819.66   27.20
  10  -1   7   80.24    9.16
  10   1   7   80.40    9.65
  10  -1   7   61.56    8.34
  10  -1   8  117.26   11.06
  10   1   8  115.96   11.28
  10  -1   8  126.66   11.37
  10   1   9   38.34    7.84
  10  -1   9   50.02    8.43
  10   1  10   14.36    6.45
  10  -1  10    6.70    5.43
  10  -1  11  236.65   16.45
  10   1  11  224.35   16.44
  10   1  11  216.59   16.16
  10  -1  12  201.93   15.63
 -10   2  20   22.80    6.90
 -10   2  19   77.60    9.62
 -10   2  18   27.56    6.71
 -10   2  17  340.36   17.93
 -10   2  16  163.62   12.54
 -10   2  15    1.95    5.09
 -10  -2  14  475.98   16.07
 -10   2  14  488.00   20.08
 -10  -2  13  124.39    8.32
 -10   2  13  107.15    9.56
 -10  -2  12  666.48   19.31
 -10   2  12  640.66   22.63
 -10   2  11  455.57   18.54
 -10  -2  11  441.85   15.32
 -10  -2  10  131.71    8.43
  10   2 -10  118.07    8.76
 -10   2  10  117.94    9.76
 -10  -2   9  110.33    7.94
  10  -2  -9   96.32    4.84
  10   2  -9   90.37    7.41
 -10   2   9  104.24    8.99
 -10   2   8 1983.17   42.37
  10  -2  -8 1985.63   37.27
  10   2  -8 1956.21   39.33
  10  -2  -8 1870.27   30.87
  10   2  -8 1969.24   37.42
  10  -2  -7    9.41    3.66
  10   2  -7    9.90    3.62
  10  -2  -7    7.79    2.43
  10   2  -7    4.46    3.01
 -10   2   7   10.82    4.90
  10   2  -6  309.71   12.77
 -10   2   6  315.56   15.32
  10  -2  -6  318.44   12.59
 -10   2   5   29.50    5.97
  10   2  -5   22.78    4.48
  10  -2  -5   28.80    4.82
 -10   2   4  112.69    9.93
  10   2  -4  120.05    8.41
  10  -2  -4  124.88    8.26
  10   2  -3 1131.55   27.43
  10   2  -3 1136.91   30.75
 -10   2   3 1163.86   30.91
  10  -2  -3 1179.06   27.33
  10   2  -2  160.59    9.84
  10   2  -2  167.83   11.64
  10  -2  -2  176.75   10.12
  10   2  -1  166.22   11.35
  10  -2  -1  150.74    9.54
  10   2   0  925.79   27.43
  10  -2   0  897.41   24.72
  10  -2   1   45.19    6.27
  10   2   1   47.19    7.22
  10   2   2  501.22   20.15
  10  -2   2  525.12   19.20
  10  -2   3   11.33    4.97
  10   2   3   15.76    6.33
  10  -2   3   10.00    4.96
  10  -2   4    6.42    4.49
  10   2   4    7.76    5.32
  10  -2   4    5.31    4.31
  10   2   5  180.86   13.08
  10  -2   5  183.40   12.33
  10  -2   5  157.78   11.62
  10  -2   6  172.58   12.48
  10  -2   6  137.24   11.10
  10   2   6  154.43   12.28
  10  -2   7  151.09   12.08
  10   2   7  161.09   12.56
  10   2   8  149.19   12.66
  10  -2   8  134.97   11.93
  10   2   9   22.79    7.14
  10  -2   9    3.71    5.20
  10   2  10   62.42    9.78
  10  -2  10   69.30    9.45
  10   2  11   94.42   12.25
  10  -2  11  116.51   12.05
 -10   3  19   37.00    7.49
 -10   3  18  130.16   11.85
 -10   3  17   57.36    8.81
 -10   3  16   -8.27    5.97
 -10   3  15  436.43   20.26
 -10   3  14  240.67   14.99
 -10   3  13  383.65   18.30
 -10   3  12   46.34    7.32
 -10  -3  12   33.78    4.73
 -10   3  11    1.05    4.60
 -10   3  10    4.19    4.63
  10  -3 -10    4.84    2.74
 -10   3   9 1159.82   31.88
  10  -3  -9 1195.02   24.78
  10  -3  -8   51.48    4.93
 -10   3   8   53.38    7.09
  10  -3  -8   47.70    2.71
  10  -3  -7 1024.34   22.01
 -10   3   7  973.83   28.02
  10   3  -7  928.31   22.24
  10  -3  -7  834.42   16.46
  10  -3  -7  975.01   17.27
  10   3  -6  123.71    7.73
 -10   3   6  108.32    9.79
  10  -3  -6  108.84    6.90
  10  -3  -6  107.33    5.44
  10   3  -5  316.71   12.61
 -10   3   5  335.00   16.21
  10  -3  -5  357.54   12.62
  10  -3  -5  346.75   10.75
  10   3  -4  172.77    9.51
 -10   3   4  179.40   12.15
  10  -3  -4  179.96    9.32
  10  -3  -4  179.62    8.07
  10   3  -3   -3.22    3.50
 -10   3   3   -3.28    4.70
  10  -3  -3   -3.03    3.27
  10  -3  -3    1.18    2.54
 -10   3   2  143.74   11.31
  10   3  -2  140.25    9.08
  10   3  -2  146.80   11.25
  10  -3  -2  151.28    8.96
  10  -3  -2  141.79    8.17
  10   3  -1  747.32   21.85
  10   3  -1  752.25   25.33
  10  -3  -1  764.98   21.45
  10  -3  -1  735.69   20.42
  10   3   0   42.64    7.11
  10  -3   0   46.58    6.18
  10  -3   0   51.17    5.91
  10   3   1  625.24   22.99
  10  -3   1  613.93   19.87
  10  -3   1  656.36   20.55
  10  -3   2    6.73    4.45
  10   3   2    5.24    5.79
  10  -3   2    1.21    4.14
  10  -3   3    8.77    5.15
  10   3   3    3.56    5.73
  10  -3   3    5.92    4.41
  10  -3   4  155.82   10.96
  10  -3   4  163.15   11.39
  10   3   4  188.85   13.26
  10   3   5   24.08    6.28
  10  -3   5   30.13    5.95
  10  -3   6  493.09   20.64
  10   3   6  530.48   22.47
  10  -3   7  416.49   19.31
  10   3   7  419.43   20.60
  10  -3   8  198.69   14.05
  10   3   8  183.53   14.32
  10   3   9  378.08   20.34
  10  -3   9  362.76   19.09
  10   3  10   83.65   10.62
  10  -3  10   70.48    9.52
  10   3  11  118.77   12.49
  10  -3  11  114.12   12.28
 -10   4  18   59.51    9.35
 -10   4  17  141.55   12.89
 -10   4  16   35.73    7.42
 -10   4  15    4.83    4.89
 -10   4  14   10.79    6.13
 -10   4  13  134.37   11.67
 -10   4  12   48.55    7.54
 -10   4  11  702.79   25.26
 -10   4  10    2.86    4.77
 -10   4   9  195.97   13.13
  10  -4  -9  226.63    8.23
 -10   4   8    0.95    4.92
  10  -4  -8    4.24    2.48
  10   4  -7  221.00    9.37
 -10   4   7  203.69   13.00
  10  -4  -7  243.74    9.07
  10   4  -6   42.96    4.94
 -10   4   6   43.05    7.19
  10  -4  -6   55.07    4.78
  10  -4  -6   40.72    3.05
  10   4  -5  159.82    8.46
 -10   4   5  184.02   12.62
  10  -4  -5  179.65    8.19
  10  -4  -5  162.28    6.69
  10   4  -4  267.84   11.35
 -10   4   4  296.52   15.78
  10  -4  -4  287.49    9.96
  10  -4  -4  318.26   11.53
  10   4  -3  186.58    9.75
 -10   4   3  176.95   12.57
  10  -4  -3  185.08    9.23
  10  -4  -3  188.44    8.75
 -10   4   2   58.70    7.67
  10   4  -2   56.84    5.93
  10  -4  -2   52.93    5.75
  10  -4  -2   49.16    5.09
 -10   4   1  768.42   26.24
  10   4  -1  763.24   21.84
  10   4  -1  752.48   25.96
  10  -4  -1  766.11   20.90
  10  -4  -1  780.75   20.69
  10  -4   0    1.83    3.71
  10   4   0    3.84    5.50
  10  -4   0    1.08    3.38
  10   4   1  226.04   14.26
  10  -4   1  210.44   11.35
  10  -4   1  221.80   11.59
  10   4   2   11.76    5.69
  10  -4   2   12.76    4.38
  10   4   3  445.90   20.16
  10  -4   3  468.25   18.22
  10   4   4   76.86    9.46
  10  -4   4   67.79    8.30
  10   4   5  930.31   30.46
  10  -4   5  923.21   28.17
  10   4   6   37.42    7.93
  10  -4   6   34.06    6.80
  10   4   7  260.06   16.42
  10  -4   7  289.15   16.48
  10   4   8    5.06    5.82
  10  -4   8   -0.79    5.13
  10   4   9   58.39    8.78
  10  -4   9   55.51    8.70
  10   4  10  137.44   13.03
  10  -4  10  138.50   12.56
  10  -4  11  151.24   13.46
 -10   5  16   -4.42    6.09
 -10   5  15  474.63   22.88
 -10   5  14  135.90   12.63
 -10   5  13   93.64   10.59
 -10   5  12    1.37    5.69
 -10   5  11   33.16    7.09
 -10   5  10   20.09    6.47
 -10   5   9  112.46   10.91
 -10   5   8   12.86    5.88
 -10   5   7  317.52   17.08
 -10   5   6   30.46    6.44
 -10   5   5  792.81   26.81
  10   5  -5  716.28   18.12
  10  -5  -5  741.35   14.48
  10   5  -4   14.98    3.56
 -10   5   4    5.61    4.94
  10  -5  -4   15.80    2.94
  10   5  -3  152.19    8.58
 -10   5   3  146.42   11.86
  10  -5  -3  152.77    7.49
 -10   5   2   66.81    8.99
  10   5  -2   48.40    5.40
  10  -5  -2   44.55    4.75
  10   5  -1  279.36   16.23
  10   5  -1  286.35   12.61
 -10   5   1  266.71   16.00
  10  -5  -1  271.71   11.54
  10   5   0   40.99    7.89
  10  -5   0   30.43    4.87
  10   5   1  470.01   21.26
  10  -5   1  445.89   16.48
  10   5   2  191.01   13.71
  10  -5   2  158.89   10.35
  10   5   3  400.38   19.66
  10  -5   3  372.78   16.37
  10   5   4    9.95    6.72
  10  -5   4    2.67    4.25
  10   5   5  218.37   15.01
  10  -5   5  222.04   13.72
  10   5   6   90.75   10.65
  10  -5   6   83.30    9.19
  10  -5   7  216.45   13.94
  10   5   7  220.49   15.54
  10   5   8   21.91    6.52
  10  -5   8   27.91    7.29
  10  -5   9  511.07   23.13
  10   5   9  542.67   25.00
  10  -5  10   39.21    7.59
 -10   6  14   22.79    7.06
 -10   6  13  193.45   14.89
 -10   6  12   -6.48    5.93
 -10   6  11  356.86   19.15
 -10   6  10  119.88   11.76
 -10   6   9  239.04   15.50
 -10   6   8   52.53    8.04
 -10   6   7    6.16    5.92
 -10   6   6   20.08    6.78
 -10   6   5  581.49   23.69
 -10   6   4   -5.12    5.92
 -10   6   3 1518.31   40.70
  10  -6  -3 1529.60   28.16
  10  -6  -2   32.37    4.21
 -10   6   2   23.37    6.99
 -10   6   1  192.91   14.10
  10  -6  -1  202.09    9.88
 -10   6   0   33.44    7.33
  10   6   0   36.64    7.67
  10  -6   0   36.63    5.01
  10   6   1  305.67   17.60
  10  -6   1  285.95   13.01
  10   6   2   64.56    9.49
  10  -6   2   52.58    6.50
  10   6   3  311.92   17.92
  10  -6   3  314.47   14.97
  10   6   4   16.70    6.19
  10  -6   4   16.69    5.29
  10   6   5  373.06   19.75
  10  -6   5  319.79   16.51
  10   6   6   29.30    7.88
  10  -6   6   38.44    6.89
  10  -6   7  187.68   13.62
  10   6   7  192.20   14.95
  10   6   8   16.14    7.22
  10  -6   8    3.93    5.45
  10  -6   9   11.23    5.66
  10  -6  10   37.43    8.20
 -10   7  12  347.11   20.24
 -10   7  11   22.92    7.16
 -10   7  10  311.09   18.68
 -10   7   9  341.41   19.21
 -10   7   8   64.85    9.31
 -10   7   7  642.54   26.12
 -10   7   6  205.03   14.96
 -10   7   5   66.73    9.66
 -10   7   4  561.20   24.07
 -10   7   3    7.79    5.51
 -10   7   2  210.83   15.21
  10  -7  -1   68.75    6.10
 -10   7   1   60.83    9.26
  10   7   0    8.35    6.45
  10  -7   0    8.21    3.67
 -10   7   0   14.87    6.27
  10   7   1  644.53   26.25
  10  -7   1  636.72   20.52
  10   7   2  234.48   16.05
  10  -7   2  229.25   12.52
  10   7   3   54.28    8.66
  10  -7   3   58.17    7.17
  10   7   4  314.57   18.53
  10  -7   4  291.52   15.15
  10   7   5   27.81    7.61
  10  -7   5   32.94    6.50
  10   7   6   61.96    9.06
  10  -7   6   61.61    7.75
  10   7   7  113.55   12.53
  10  -7   7  110.03   11.03
  10  -7   8    1.33    5.92
  10  -7   9   49.59    8.33
 -10   8   9   15.49    7.09
 -10   8   8  239.41   16.54
 -10   8   7   21.91    6.64
 -10   8   6  553.67   24.96
 -10   8   5    5.35    6.08
 -10   8   4  153.81   13.49
 -10   8   3   21.48    7.07
 -10   8   2  148.81   13.42
 -10   8   1  112.15   12.10
 -10   8   0  392.33   21.27
  10   8   0  407.43   21.12
  10   8   1    7.61    6.72
  10   8   2  217.93   15.93
  10  -8   2  240.37   13.02
  10   8   3    2.98    5.59
  10  -8   3    7.03    4.55
  10   8   4   41.95    8.92
  10  -8   4   38.61    6.86
  10   8   5  102.47   11.36
  10  -8   5   92.57    9.49
  10  -8   6   18.21    6.35
  10  -8   7   88.18   10.38
  10  -8   8  215.67   15.20
 -10   9   5   35.36    7.86
 -10   9   4   70.43    9.71
 -10   9   3   -4.47    5.85
 -10   9   2  356.22   21.05
 -10   9   1   24.98    7.85
  10   9   0   99.52   12.02
 -10   9   0   92.45   11.36
  10   9   1    4.91    6.60
  10  -9   6  220.77   15.19
  10  -9   7    1.04    5.35
 -11   0  16   62.02    7.98
 -11   0  15    5.08    4.42
 -11   0  14  262.58   14.03
 -11   0  13   -1.00    4.06
 -11   0  12  894.96   26.13
 -11   0  11    0.65    4.20
 -11   0  10  560.04   20.16
  11   0  -9   -0.04    2.82
 -11   0   9    1.39    4.38
  11   0  -8    1.68    5.36
 -11   0   8   -0.56    4.24
 -11   0   7    3.11    4.67
  11   0  -6   23.03    5.66
  11   0  -5    1.04    4.32
  11   0  -4  716.11   23.00
  11   0  -3    4.68    4.81
  11   0  -2  804.56   24.72
  11   0  -1   -2.30    4.42
  11   0   0   -0.08    4.55
  11   0   1    3.23    4.60
  11   0   2  807.67   26.12
  11   0   3   -0.90    5.04
  11   0   4  779.09   26.71
  11   0   5   -2.30    5.38
  11   0   6  612.99   24.63
  11   0   7    1.31    5.26
  11   0   8   19.04    6.77
  11   0   9    0.15    5.56
  11   0   9    0.58    5.04
  11   0  10  460.78   23.19
  11   0  10  437.38   22.64
 -11   1  18  296.18   16.69
 -11   1  17   55.82    7.56
 -11   1  16  308.80   16.80
 -11   1  15    8.37    5.19
 -11  -1  15   13.48    4.11
 -11   1  14   14.35    5.70
 -11  -1  14   18.86    4.82
 -11   1  13   11.18    5.00
 -11  -1  13   16.06    5.03
 -11  -1  12   10.69    4.63
 -11   1  12   -2.30    4.28
 -11  -1  11    1.34    3.79
 -11   1  11   11.25    5.10
 -11   1  10  549.96   20.60
 -11  -1  10  542.48   19.12
  11   1  -9   10.62    3.50
 -11  -1   9    8.19    4.43
 -11   1   9   10.91    5.32
 -11   1   8 1488.04   36.12
  11  -1  -8 1507.26   33.89
  11   1  -8 1421.61   32.04
 -11   1   7   25.80    5.89
  11  -1  -7   15.15    5.17
 -11   1   6   57.97    7.75
  11  -1  -6   54.06    6.80
 -11   1   5    6.52    4.62
  11   1  -5    3.51    4.46
  11  -1  -5    8.99    4.32
  11  -1  -4  190.45   11.37
  11   1  -4  178.43   11.81
  11  -1  -3  231.69   12.35
  11   1  -3  215.89   12.90
  11   1  -2  385.62   17.25
  11  -1  -2  385.80   16.12
  11  -1  -1   44.19    6.64
  11   1  -1   56.73    7.73
  11   1   0  712.07   24.34
  11  -1   0  748.43   23.75
  11  -1   1   13.52    5.30
  11   1   1   13.89    5.39
  11   1   2  568.05   22.06
  11  -1   2  572.54   21.49
  11  -1   3   -2.37    4.65
  11   1   3   -1.36    4.73
  11  -1   4    7.11    5.75
  11   1   4   -0.52    4.95
  11   1   5  231.18   14.89
  11  -1   5  219.33   14.47
  11   1   6  497.79   22.16
  11  -1   6  498.64   21.62
  11  -1   6  502.32   21.85
  11  -1   7   33.18    7.36
  11   1   7   39.54    7.92
  11  -1   7   44.31    7.77
  11  -1   8  514.56   23.14
  11  -1   8  495.73   22.82
  11   1   8  476.52   22.70
  11   1   9   61.58   10.09
  11  -1   9   48.88    8.98
  11   1  10   67.08   10.15
  11  -1  10   86.07   10.80
 -11   2  19    4.80    5.63
 -11   2  18  250.68   16.09
 -11   2  17  114.65   10.94
 -11   2  16   51.39    7.59
 -11   2  15  188.00   13.19
 -11   2  14  361.35   17.98
 -11   2  13    3.96    5.20
 -11  -2  13    3.51    3.55
 -11   2  12  510.76   20.94
 -11  -2  12  537.16   18.14
 -11   2  11  330.38   16.61
 -11  -2  11  349.75   14.36
 -11   2  10  948.09   28.62
 -11   2   9  563.92   21.42
  11  -2  -9  573.26   18.22
 -11   2   8   51.45    7.41
  11   2  -8   34.65    5.14
  11  -2  -8   40.37    5.42
  11   2  -7   57.63    6.36
 -11   2   7   65.50    8.54
  11  -2  -7   70.96    6.61
  11   2  -6 1123.43   28.21
  11  -2  -6 1211.43   28.14
 -11   2   6 1204.16   32.79
 -11   2   5   28.64    6.22
  11  -2  -5   22.88    4.43
 -11   2   4  391.74   17.84
  11   2  -4  367.12   17.46
  11  -2  -4  365.05   14.73
  11   2  -3  108.61   10.17
  11  -2  -3  117.60    8.81
  11   2  -2   56.66    7.83
  11  -2  -2   53.86    6.81
  11   2  -1  528.97   21.04
  11  -2  -1  533.77   18.86
  11  -2   0    9.11    4.57
  11   2   0   -6.86    4.97
  11  -2   1  108.37    9.34
  11   2   1   99.27    9.95
  11   2   2  403.57   19.01
  11  -2   2  390.01   17.30
  11  -2   3   25.04    5.93
  11   2   3   37.65    7.06
  11  -2   3   41.76    7.07
  11   2   4  635.07   24.56
  11  -2   4  605.04   22.53
  11  -2   4  615.05   22.88
  11  -2   5   79.56    9.13
  11   2   5   83.72    9.57
  11  -2   5   60.05    7.90
  11  -2   6   79.09    9.35
  11   2   6   64.12    9.15
  11  -2   6   74.39    8.85
  11   2   7  156.13   13.54
  11  -2   7  121.96   11.27
  11   2   8   22.60    7.78
  11  -2   8   26.33    6.95
  11  -2   9  208.54   15.39
  11   2   9  217.69   15.90
  11  -2  10   76.98   10.26
 -11   3  18   46.08    8.68
 -11   3  17  240.61   15.85
 -11   3  16  108.31   11.08
 -11   3  15   61.19    8.53
 -11   3  14   86.40    9.65
 -11   3  13  775.20   27.37
 -11   3  12   30.97    7.07
 -11   3  11  455.49   20.16
 -11   3  10  376.87   18.16
  11  -3 -10  396.61   13.43
 -11   3   9   45.26    7.74
  11  -3  -9   45.72    5.27
 -11   3   8   86.63    9.49
  11  -3  -8   72.70    5.83
  11   3  -7  546.89   17.48
 -11   3   7  557.25   21.96
  11  -3  -7  586.40   17.16
  11  -3  -7  549.61   13.16
  11   3  -6  150.57    9.23
 -11   3   6  150.92   11.73
  11  -3  -6  149.64    7.00
  11  -3  -6  176.89    9.19
  11   3  -5  847.10   23.30
 -11   3   5  919.99   29.07
  11  -3  -5  954.92   23.35
  11  -3  -5  912.38   20.44
 -11   3   4   71.65    9.03
  11   3  -4   77.20    7.24
  11  -3  -4   76.01    6.75
  11  -3  -4   81.87    6.13
 -11   3   3  397.43   18.83
  11   3  -3  386.92   18.50
  11  -3  -3  388.16   13.73
  11  -3  -3  406.34   15.25
  11   3  -2  202.96   13.73
  11  -3  -2  209.72   11.11
  11  -3  -2  189.67   10.02
  11   3  -1    3.56    5.22
  11  -3  -1    9.46    4.45
  11  -3  -1    4.30    3.40
  11   3   0  414.43   19.28
  11  -3   0  375.45   15.44
  11  -3   0  386.99   16.13
  11   3   1  181.79   13.09
  11  -3   1  190.76   11.40
  11  -3   1  184.54   11.55
  11  -3   2   52.06    7.19
  11   3   2   53.06    8.07
  11  -3   2   47.65    6.57
  11   3   3  247.10   15.33
  11  -3   3  237.05   13.66
  11  -3   3  234.71   13.57
  11  -3   4   51.89    7.47
  11   3   4   50.94    8.45
  11  -3   4   53.44    7.33
  11   3   5   81.50   10.07
  11  -3   5   89.30    9.60
  11   3   6   23.89    6.20
  11  -3   6   10.62    5.39
  11   3   7    2.84    6.19
  11  -3   7    7.06    5.05
  11   3   8  104.76   11.61
  11  -3   8  118.34   11.73
  11   3   9   16.08    7.82
  11  -3   9   28.17    7.38
  11  -3  10  195.31   15.31
 -11   4  16  102.13   11.31
 -11   4  15   32.98    7.67
 -11   4  14   -1.83    5.41
 -11   4  13   -8.64    5.80
 -11   4  12    5.67    5.81
 -11   4  11   36.09    7.39
 -11   4  10    3.92    5.20
 -11   4   9  404.22   19.37
 -11   4   8   29.00    6.92
 -11   4   7  495.18   21.51
  11  -4  -7  519.72   14.78
 -11   4   6   29.92    6.89
  11  -4  -6   29.71    4.10
 -11   4   5   33.88    6.67
  11  -4  -5   48.06    5.01
  11  -4  -5   41.98    4.11
  11   4  -4    0.30    3.45
 -11   4   4   12.43    6.61
  11  -4  -4    1.68    3.28
  11  -4  -4    5.43    2.87
  11   4  -3  249.17   12.16
 -11   4   3  256.02   15.94
  11  -4  -3  274.00   11.95
  11  -4  -3  258.84   10.82
 -11   4   2  107.75   10.78
  11   4  -2  103.29   10.62
  11  -4  -2  117.24    8.28
  11  -4  -2  108.26    7.56
  11   4  -1  474.21   21.35
  11  -4  -1  481.28   17.03
  11  -4  -1  470.94   16.32
  11   4   0   15.06    6.12
  11  -4   0   19.46    5.02
  11  -4   0   12.89    4.61
  11   4   1  415.82   20.02
  11  -4   1  446.78   17.40
  11  -4   1  408.64   16.59
  11   4   2  133.60   11.71
  11  -4   2  116.83    9.38
  11   4   3  268.81   16.43
  11  -4   3  248.91   13.83
  11   4   4   86.01    9.97
  11  -4   4   80.12    8.97
  11   4   5   72.25   10.10
  11  -4   5   61.58    7.92
  11   4   6   40.82    8.30
  11  -4   6   35.75    6.72
  11  -4   7  468.89   21.57
  11   4   7  470.89   22.76
  11   4   8   26.86    8.91
  11  -4   8   12.60    6.45
  11  -4   9  661.77   27.02
 -11   5  15  193.56   15.08
 -11   5  14   -0.38    5.16
 -11   5  13  311.03   18.45
 -11   5  12   11.90    5.85
 -11   5  11  149.92   12.90
 -11   5  10    3.95    5.48
 -11   5   9   -4.36    5.55
 -11   5   8    7.28    5.12
 -11   5   7  143.81   12.26
 -11   5   6   36.37    7.77
 -11   5   5  207.48   14.49
 -11   5   4   -5.91    5.91
 -11   5   3  730.85   27.36
  11  -5  -3  726.76   18.46
 -11   5   2   11.16    6.23
  11   5  -2    7.64    5.76
  11  -5  -2    2.34    2.65
  11   5  -1  204.51   14.70
  11  -5  -1  186.75   10.07
  11   5   0    1.29    5.46
  11  -5   0   10.08    4.14
  11   5   1  229.04   15.44
  11  -5   1  217.45   12.05
  11   5   2    9.26    6.63
  11  -5   2   20.58    5.32
  11   5   3  628.98   25.37
  11  -5   3  567.13   21.06
  11   5   4   20.01    6.66
  11  -5   4    7.65    4.67
  11  -5   5  519.63   21.60
  11   5   5  571.13   24.90
  11   5   6    7.77    6.04
  11  -5   6    5.76    5.50
  11   5   7  127.66   12.79
  11  -5   7  134.19   12.03
  11  -5   8    1.12    5.20
  11  -5   9  121.72   12.13
 -11   6  12   -1.42    5.23
 -11   6  11  331.36   19.26
 -11   6  10   30.14    7.34
 -11   6   9  487.91   22.91
 -11   6   8   11.36    6.40
 -11   6   7  227.47   15.49
 -11   6   6   74.01    9.53
 -11   6   5   96.41   10.83
 -11   6   4   10.47    7.09
 -11   6   3  209.92   15.35
 -11   6   2   13.18    5.82
 -11   6   1  880.07   31.25
  11   6  -1  914.50   31.49
  11  -6  -1  845.74   22.41
  11   6   0   43.61    7.93
  11  -6   0   41.57    5.54
  11   6   1  409.27   20.91
  11  -6   1  426.82   16.81
  11   6   2   -2.34    5.49
  11  -6   2    0.73    5.59
  11   6   3   -9.93    6.46
  11  -6   3   -4.80    4.02
  11   6   4  184.38   14.60
  11  -6   4  167.34   12.07
  11   6   5  156.82   13.72
  11  -6   5  137.21   11.23
  11  -6   6  223.82   14.81
  11   6   6  226.95   16.33
  11  -6   7   42.12    7.98
  11  -6   8   14.74    6.59
  11  -6   9  182.02   14.88
 -11   7  10  214.35   16.37
 -11   7   9   13.26    7.04
 -11   7   8  299.50   18.49
 -11   7   7  189.84   14.83
 -11   7   6  137.11   13.16
 -11   7   5  610.64   26.60
 -11   7   4   40.72    8.55
 -11   7   3  128.66   12.52
 -11   7   2  365.70   20.43
 -11   7   1   44.12    9.08
  11   7  -1   49.01    8.97
  11   7   0   78.89   10.11
  11   7   1   89.12   11.12
  11   7   2    2.68    5.48
  11  -7   2    1.76    3.68
  11   7   3  323.99   19.34
  11  -7   3  290.22   15.08
  11  -7   4   12.92    5.01
  11  -7   5   72.51    8.79
  11  -7   6  103.89   10.71
  11  -7   7   -1.33    4.98
  11  -7   8   32.92    7.45
 -11   8   5   -3.73    6.13
 -11   8   4  618.56   27.52
 -11   8   3   12.46    6.96
 -11   8   2   90.82   11.45
  11   8  -1   44.24    8.92
 -11   8   1   45.28    9.51
  11  -8   6    1.89    4.91
  11  -8   7   70.73   10.26
 -12   0  15   12.09    5.89
 -12   0  14   13.16    5.72
 -12   0  13    3.33    5.05
 -12   0  12  114.96   10.11
 -12   0  11    3.24    4.59
 -12   0  10  734.24   24.63
 -12   0   9   -3.58    5.00
 -12   0   8  296.21   15.33
  12   0  -7    0.83    4.49
  12   0  -6  131.48   10.34
  12   0  -5   -3.17    4.37
  12   0  -4  177.68   11.97
  12   0  -3   -0.99    4.65
  12   0  -2  108.76    9.76
  12   0  -1   -1.24    4.76
  12   0   0 1563.76   39.00
  12   0   1    3.13    5.42
  12   0   2   93.90    9.83
  12   0   3  -10.01    6.03
  12   0   4  668.08   25.67
  12   0   5   -4.20    5.30
  12   0   6 1083.34   34.82
  12   0   7    6.26    6.87
  12   0   8  324.98   19.42
  12   0   8  385.86   21.21
 -12   1  16  256.92   15.44
 -12   1  15    3.36    4.68
 -12   1  14  545.07   22.26
 -12  -1  13   70.99    7.73
 -12   1  13   80.08    9.00
 -12   1  12  274.31   15.36
 -12  -1  12  274.43   14.54
 -12  -1  11   -0.30    3.89
 -12   1  11    5.53    4.88
 -12  -1  10    1.32    3.95
 -12   1  10    7.74    5.07
 -12   1   9    4.33    4.68
  12  -1  -9    1.71    4.21
 -12   1   8  206.45   13.41
  12  -1  -8  191.63   11.71
 -12   1   7   15.09    5.50
  12  -1  -7    9.76    4.67
  12  -1  -6 1138.29   29.63
  12   1  -6 1091.89   31.26
  12   1  -5   -7.90    5.43
  12  -1  -5   -2.08    4.31
  12  -1  -4  287.41   14.27
  12   1  -4  284.75   15.56
  12  -1  -3   48.15    6.86
  12   1  -3   43.32    7.33
  12  -1  -2   -2.02    4.50
  12   1  -2   -7.60    5.42
  12   1  -1  156.70   12.00
  12  -1  -1  170.99   11.68
  12   1   0  355.33   17.91
  12  -1   0  362.90   16.91
  12  -1   1   40.23    6.96
  12   1   1   67.82    8.39
  12  -1   2  762.55   26.06
  12   1   2  760.14   27.05
  12  -1   3    0.07    4.87
  12   1   3   -1.93    5.77
  12   1   4  264.14   16.36
  12  -1   4  274.58   16.27
  12  -1   5   58.59    8.90
  12   1   5   65.07    9.84
  12  -1   6   18.60    7.27
  12   1   6    6.66    5.65
  12  -1   6    9.21    5.66
  12  -1   7  280.86   17.49
  12  -1   7  261.02   16.72
  12   1   7  270.08   17.59
  12  -1   8   91.90   11.22
  12   1   8  103.28   11.90
  12  -1   8  104.25   11.59
 -12   2  17   13.80    6.50
 -12   2  16  138.88   12.22
 -12   2  15   86.16    9.80
 -12   2  14   -2.85    5.15
 -12   2  13  279.47   16.29
 -12   2  12  534.87   22.18
 -12   2  11   20.33    5.89
  12  -2 -11   23.43    4.78
 -12   2  10  484.03   20.96
  12  -2 -10  522.73   17.96
 -12   2   9   15.00    5.57
  12  -2  -9   23.74    4.56
  12  -2  -8  215.26   11.41
 -12   2   8  221.90   14.28
  12  -2  -7  282.94   13.29
 -12   2   7  268.35   15.62
 -12   2   6    9.43    5.20
  12  -2  -6    7.52    4.30
 -12   2   5  365.62   18.08
  12   2  -5  340.29   17.38
  12  -2  -5  347.60   14.76
  12   2  -4 1003.53   30.94
  12  -2  -4 1023.82   27.35
  12   2  -3   28.10    6.97
  12  -2  -3   28.15    5.84
  12   2  -2  513.60   21.48
  12  -2  -2  521.13   19.28
  12  -2  -1   -7.04    5.35
  12   2  -1    0.45    5.10
  12  -2   0   26.61    6.15
  12   2   0   33.69    7.32
  12   2   1  200.35   14.19
  12  -2   1  198.35   12.90
  12   2   2  177.84   13.36
  12  -2   2  148.34   11.12
  12  -2   2  164.66   11.88
  12  -2   3   41.61    7.39
  12   2   3   64.48    8.96
  12  -2   3   50.46    7.16
  12   2   4  181.78   14.00
  12  -2   4  159.48   12.45
  12  -2   4  169.28   12.78
  12  -2   5   13.08    6.88
  12   2   5    5.38    6.00
  12  -2   5    7.26    5.09
  12  -2   6  153.70   12.87
  12   2   6  155.45   13.79
  12  -2   6  147.66   12.65
  12   2   7   16.31    7.16
  12  -2   7    8.20    5.30
  12  -2   8  138.52   12.61
 -12   3  17  170.34   14.00
 -12   3  16   81.98   10.39
 -12   3  15  104.04   11.19
 -12   3  14   29.53    7.25
 -12   3  13   83.02    9.62
 -12   3  12   70.60    9.09
 -12   3  11  473.04   21.36
 -12   3  10   44.65    7.86
 -12   3   9  460.16   21.05
 -12   3   8  490.58   21.70
  12  -3  -8  529.14   16.90
 -12   3   7   12.65    6.07
  12  -3  -7    5.33    3.35
 -12   3   6  198.41   14.08
  12  -3  -6  189.46   10.30
 -12   3   5  434.90   20.59
  12  -3  -5  479.95   16.82
  12  -3  -5  476.95   14.81
 -12   3   4   21.18    6.20
  12   3  -4    1.45    5.00
  12  -3  -4    6.86    3.88
  12  -3  -4    7.08    3.26
  12   3  -3  906.90   30.18
  12  -3  -3  921.40   25.28
  12  -3  -3  925.34   23.75
  12   3  -2   30.71    7.16
  12  -3  -2   43.66    6.26
  12  -3  -2   31.54    4.98
  12   3  -1  227.87   14.99
  12  -3  -1  219.23   11.85
  12  -3  -1  198.80   11.96
  12  -3   0    8.42    4.41
  12   3   0    2.35    5.37
  12  -3   0   20.38    5.43
  12  -3   1   -3.54    4.49
  12   3   1   -5.19    5.10
  12  -3   1    9.44    4.70
  12   3   2  348.80   18.91
  12  -3   2  301.69   15.44
  12  -3   2  317.29   16.28
  12  -3   3   83.18    9.28
  12   3   3   92.80   10.60
  12  -3   3   74.42    8.51
  12  -3   4  172.90   12.74
  12  -3   4  203.25   13.63
  12   3   4  196.65   15.03
  12   3   5   66.50    9.97
  12  -3   5   50.81    7.51
  12   3   6   37.58    8.46
  12  -3   6   32.66    7.17
  12  -3   7  141.05   12.62
  12  -3   8   37.01    7.95
 -12   4  15  419.45   21.80
 -12   4  14   16.21    6.50
 -12   4  13  240.29   16.08
 -12   4  12    7.18    5.74
 -12   4  11   17.84    6.84
 -12   4  10   -0.93    5.26
 -12   4   9   -2.91    5.43
 -12   4   8    2.98    5.87
 -12   4   7  320.80   18.10
 -12   4   6   33.88    7.30
 -12   4   5 1053.68   33.98
  12  -4  -5 1114.11   26.26
 -12   4   4    1.74    5.22
  12  -4  -4    5.95    3.98
  12   4  -3  126.91   11.83
  12  -4  -3  121.27    8.66
  12  -4  -3  102.14    7.31
  12  -4  -2   28.49    5.51
  12   4  -2   24.69    6.95
  12  -4  -2   34.16    5.15
  12   4  -1   71.55    9.36
  12  -4  -1   67.20    7.36
  12  -4  -1   70.14    7.17
  12   4   0  181.95   14.25
  12  -4   0  202.32   12.11
  12  -4   0  198.49   11.63
  12   4   1  287.07   17.35
  12  -4   1  268.93   14.14
  12  -4   1  264.28   13.95
  12   4   2   14.66    7.02
  12  -4   2    8.20    4.67
  12   4   3  479.68   22.75
  12  -4   3  404.34   18.41
  12   4   4  135.22   12.89
  12  -4   4  136.03   11.22
  12   4   5  329.75   19.49
  12  -4   5  275.01   16.13
  12  -4   6   86.38   10.10
  12  -4   7   -2.17    5.00
  12  -4   8   41.51    7.70
 -12   5  13   48.94    9.58
 -12   5  12   19.80    6.83
 -12   5  11   94.85   10.97
 -12   5  10  114.45   11.70
 -12   5   9  218.88   15.81
 -12   5   8   18.74    6.36
 -12   5   7  148.30   12.92
 -12   5   6    4.30    5.33
 -12   5   5    6.80    6.50
 -12   5   4   19.74    7.17
 -12   5   3  341.36   19.60
  12   5  -3  342.80   19.48
  12   5  -2    8.17    5.66
  12   5  -1  611.30   25.88
  12   5   0   71.05   10.11
  12  -5   0   60.98    6.96
  12   5   1  588.71   25.35
  12  -5   1  533.96   19.88
  12   5   2    0.30    5.56
  12  -5   2    8.03    4.36
  12   5   3   53.55    9.65
  12  -5   3   40.79    6.77
  12   5   4  115.98   12.74
  12  -5   4  103.92   10.01
  12  -5   5  350.07   18.33
  12  -5   6   13.41    5.04
  12  -5   7  440.74   21.78
  12  -5   8    7.39    5.23
 -12   6  10   -3.75    5.42
 -12   6   9  269.46   17.70
 -12   6   8  104.85   11.62
 -12   6   7  604.19   26.46
 -12   6   6  121.00   12.60
 -12   6   5  179.07   14.83
 -12   6   4   41.49    8.54
 -12   6   3    7.68    6.32
  12   6  -2   68.71   10.36
  12   6  -1   21.81    7.14
  12   6   0   42.07    8.47
  12   6   1  550.89   25.22
  12   6   2   -3.47    6.60
  12  -6   2   -7.34    4.17
  12  -6   3  387.00   17.90
  12  -6   4   15.26    5.73
  12  -6   5   -3.35    4.99
  12  -6   6   80.55    9.84
  12  -6   7   21.06    6.08
  12  -7   6  -12.59    6.16
 -13   0  13    8.31    5.47
 -13   0  12    9.02    6.59
 -13   0  11  -12.08    5.42
 -13   0  10   17.55    5.65
  13   0  -9    1.99    4.73
  13   0  -8  274.61   15.28
  13   0  -7    3.81    4.89
  13   0  -6  955.31   29.06
  13   0  -5    2.49    5.47
  13   0  -4   67.29    8.23
  13   0  -3   -1.72    5.44
  13   0  -2   26.96    6.27
  13   0  -1   -3.02    5.12
  13   0   0  571.45   22.99
  13   0   1    3.92    5.29
  13   0   2 1050.25   33.16
  13   0   3    9.28    5.99
  13   0   4   68.74   10.98
  13   0   5   10.56    6.64
  13   0   6  234.57   16.59
 -13   1  15   20.82    7.14
 -13   1  14  151.53   12.48
 -13   1  13   12.44    6.61
 -13   1  12  643.16   25.05
 -13  -1  12  677.64   23.77
 -13   1  11   -1.31    4.96
  13  -1 -11    0.35    4.19
 -13   1  10  269.21   15.93
  13  -1 -10  256.51   14.20
 -13   1   9    2.36    5.34
  13  -1  -9   10.96    5.35
 -13   1   8    8.04    5.50
  13  -1  -8    1.60    4.60
  13   1  -8    3.64    5.20
  13   1  -7   15.69    5.65
  13  -1  -7    5.63    4.81
  13   1  -6  137.48   11.58
  13  -1  -6  145.22   10.64
  13   1  -5  123.90   10.92
  13  -1  -5  140.95   10.84
  13  -1  -4  360.64   17.02
  13   1  -4  360.44   18.10
  13  -1  -3   50.29    6.93
  13   1  -3   56.53    8.77
  13   1  -2  203.61   13.74
  13  -1  -2  225.34   13.86
  13  -1  -1   27.04    6.33
  13   1  -1   32.73    6.73
  13  -1   0    8.49    5.65
  13   1   0   -5.42    5.50
  13  -1   1  314.05   17.16
  13   1   1  323.82   17.99
  13  -1   2  202.57   14.18
  13   1   2  188.90   14.29
  13  -1   3   17.94    7.09
  13   1   3   10.77    6.07
  13   1   4  532.96   24.48
  13  -1   4  500.91   22.98
  13  -1   5   16.21    6.07
  13   1   5   10.47    6.34
  13  -1   5   14.54    6.64
  13  -1   6  123.34   12.45
  13  -1   6  117.63   12.11
  13  -1   7   38.85    8.28
 -13   2  16  188.55   14.53
 -13   2  15   54.50    8.41
 -13   2  14  374.72   19.68
 -13   2  13  123.38   11.60
 -13   2  12   29.37    7.10
 -13   2  11  206.68   14.64
 -13   2  10  581.51   24.19
 -13   2   9   25.97    6.94
  13  -2  -9   32.07    5.27
 -13   2   8  443.95   20.90
  13  -2  -8  453.91   17.35
 -13   2   7   17.48    5.86
  13  -2  -7   20.89    5.48
  13   2  -6  118.47   11.20
  13  -2  -6  123.41    9.45
  13   2  -5  630.40   24.85
  13  -2  -5  597.95   20.99
  13   2  -4    4.34    5.43
  13  -2  -4   -3.39    4.19
  13   2  -3  213.65   14.58
  13  -2  -3  254.66   13.86
  13   2  -2  232.66   15.16
  13  -2  -2  236.41   13.57
  13  -2  -1    3.24    4.69
  13   2  -1   -9.92    6.37
  13   2   0  299.20   17.66
  13  -2   0  315.33   16.59
  13  -2   1    6.86    5.58
  13   2   1   -0.40    5.99
  13  -2   1    1.87    4.54
  13  -2   2   11.55    5.55
  13   2   2   10.45    6.71
  13  -2   2   16.85    5.92
  13  -2   3   52.32    8.61
  13   2   3   42.06    8.87
  13  -2   3   38.03    7.06
  13  -2   4    1.50    5.71
  13   2   4    0.79    5.68
  13  -2   4   21.28    6.70
  13  -2   5  152.44   13.11
  13   2   5  158.51   14.21
  13  -2   5  149.51   12.52
  13  -2   6    9.83    6.44
  13  -2   6   16.45    7.02
  13  -2   7   21.41    6.97
 -13   3  15  389.73   20.87
 -13   3  14   86.51   10.58
 -13   3  13   64.58    9.43
 -13   3  12   10.25    6.07
 -13   3  11   29.58    7.16
 -13   3  10   11.42    6.32
 -13   3   9  256.92   16.72
 -13   3   8  121.92   12.20
 -13   3   7  452.83   21.85
 -13   3   6   18.23    6.82
  13  -3  -6   15.35    4.80
  13   3  -5  164.89   13.68
  13  -3  -5  173.18   10.80
  13   3  -4  149.40   12.76
  13  -3  -4  136.71    9.96
  13   3  -3  257.69   16.32
  13  -3  -3  288.28   15.00
  13  -3  -2  115.17    9.77
  13   3  -2  126.10   11.96
  13  -3  -2  125.13    9.19
  13   3  -1  397.26   20.57
  13  -3  -1  378.17   16.31
  13  -3  -1  374.88   17.28
  13  -3   0    9.18    4.91
  13   3   0   -6.35    5.43
  13  -3   0    8.99    4.94
  13  -3   1   78.14    8.91
  13   3   1   87.56   10.87
  13  -3   1   87.83    8.77
  13  -3   2   66.74    8.55
  13   3   2   80.49   10.72
  13  -3   2   60.32    8.15
  13  -3   3   11.61    5.80
  13   3   3    1.11    5.69
  13  -3   3   17.65    5.61
  13  -3   4  157.71   12.90
  13  -3   5   -0.09    5.06
  13  -3   6  167.66   13.88
  13  -3   7   66.50    9.48
 -13   4  12   64.59    9.66
 -13   4  11  213.71   15.74
 -13   4  10   26.68    7.30
 -13   4   9   34.42    8.13
 -13   4   8   18.65    7.06
 -13   4   7   16.07    7.04
 -13   4   6   -6.24    6.23
 -13   4   5  183.08   14.67
  13   4  -5  182.29   14.36
  13   4  -4   32.19    7.97
  13   4  -3  626.17   26.33
  13  -4  -3  619.09   20.70
  13   4  -2   10.58    7.21
  13  -4  -2   17.60    5.25
  13   4  -1  549.75   24.47
  13  -4  -1  527.70   20.08
  13  -4   0   56.46    7.80
  13   4   0   60.21    9.45
  13  -4   0   55.69    6.77
  13   4   1   63.97    9.38
  13  -4   1   65.69    8.17
  13   4   2   72.32   10.42
  13  -4   2   75.25    8.57
  13  -4   3  258.73   15.55
  13  -4   4    6.60    5.21
  13  -4   5  249.40   16.16
  13  -4   6   36.23    7.86
  13  -4   7  236.31   16.66
 -13   5   9  195.21   15.36
 -13   5   8   54.32    9.97
 -13   5   7  533.75   25.20
 -13   5   6    0.15    6.66
 -13   5   5  186.39   15.52
 -13   5   4   51.78    9.81
  13   5  -4   51.72    9.24
  13   5  -3   16.80    7.23
  13   5  -2   37.54    8.20
  13   5  -1  270.22   18.01
  13  -5   3  631.68   24.07
  13  -5   4   26.01    6.74
  13  -5   5  -12.14    6.26
  13  -5   6   49.40    8.76
 -14   0  12  215.61   14.83
  14   0 -11    6.93    5.25
  14   0 -10   15.16    6.28
  14   0  -9    0.54    6.27
  14   0  -8    3.72    5.97
  14   0  -7   -4.97    4.70
  14   0  -6  223.47   14.31
  14   0  -5   -2.94    4.96
  14   0  -4 1250.27   35.56
  14   0  -3    5.08    5.62
  14   0  -2  176.85   13.55
  14   0  -1    0.07    5.47
  14   0   0  105.76   11.05
  14   0   1    4.92    5.84
  14   0   2  315.08   18.35
  14   0   3   -8.59    6.07
 -14   1  13   16.67    6.46
 -14   1  12   21.27    6.94
 -14   1  11   80.94    9.90
 -14   1  10  267.95   16.75
  14   1  -9   28.92    7.49
  14  -1  -9   13.73    5.28
  14  -1  -8  214.26   13.40
  14   1  -8  205.85   14.36
  14   1  -7   11.67    5.97
  14  -1  -7    6.72    4.94
  14   1  -6   62.23    8.78
  14  -1  -6   38.95    7.15
  14   1  -5  188.08   13.89
  14  -1  -5  194.50   13.20
  14  -1  -4   18.78    6.03
  14   1  -4   30.45    7.25
  14  -1  -3  126.17   11.17
  14   1  -3  128.11   11.69
  14   1  -2  400.77   20.19
  14  -1  -2  430.94   19.65
  14  -1  -1    6.47    5.48
  14   1  -1   -1.47    5.15
  14   1   0  336.26   19.05
  14  -1   0  326.34   18.08
  14  -1   1    7.86    5.51
  14   1   1    8.51    5.31
  14  -1   2   34.66    8.26
  14   1   2   43.32    8.51
  14  -1   3  235.96   15.93
  14  -1   4   35.38    8.25
  14  -1   4   44.95    8.84
  14  -1   5   51.96    8.55
 -14   2  14  346.67   19.70
 -14   2  13   40.88    8.00
 -14   2  12  119.46   12.40
 -14   2  11   52.47    8.48
 -14   2  10   -6.99    6.12
 -14   2   9   61.61    9.01
  14   2  -8  306.64   18.16
  14   2  -7   66.72    9.59
  14   2  -6  203.78   14.51
  14  -2  -6  219.75   13.06
  14   2  -5   14.29    6.07
  14  -2  -5   -5.42    4.60
  14  -2  -4   48.29    7.59
  14   2  -4   51.26    8.78
  14   2  -3  164.87   13.87
  14  -2  -3  161.06   11.84
  14  -2  -2   61.91    8.91
  14   2  -2   48.77    8.55
  14   2  -1  321.42   18.75
  14  -2  -1  320.66   16.89
  14  -2  -1  311.51   15.98
  14  -2   0   31.98    7.68
  14   2   0   25.08    6.81
  14  -2   0   19.24    5.42
  14  -2   1    0.16    5.30
  14   2   1   10.56    6.31
  14  -2   1    3.57    4.91
  14  -2   2   96.13   10.51
  14  -2   2   91.75    9.92
  14  -2   3    6.23    6.08
  14  -2   3    6.76    5.89
  14  -2   4   47.62    8.19
  14  -2   4   36.41    7.87
  14  -2   5   27.28    7.03
 -14   3  12  103.85   11.91
 -14   3  11   57.66    9.91
 -14   3  10   60.68   10.06
 -14   3   9   62.79    9.74
 -14   3   8   22.39    7.22
 -14   3   7  222.01   16.47
  14   3  -7  226.71   15.79
  14   3  -6  118.55   12.48
  14   3  -5  158.86   13.75
  14   3  -4   15.50    6.70
  14   3  -3  194.79   15.04
  14  -3  -3  183.76   12.30
  14   3  -2  300.71   18.28
  14  -3  -2  290.75   15.48
  14  -3  -1   15.00    6.36
  14   3  -1   16.12    5.83
  14  -3   0   86.37    9.58
  14   3   0   88.80   11.30
  14  -3   1  115.80   10.82
  14  -3   1  126.08   10.55
  14  -3   2   18.89    6.99
  14  -3   2    5.13    5.38
  14  -3   3   62.79    9.08
  14  -3   3   71.66    9.22
  14  -3   4   16.41    5.84
  14  -3   5   33.78    7.45
  14   4  -6   41.23    9.09
  14   4  -5   16.60    7.67
  14   4  -4  142.96   13.71
  14  -4   4   40.54    7.82
  15   0  -9   -3.18    5.51
  15   0  -8  159.76   12.76
  15   0  -7    9.70    5.96
  15   0  -6    5.44    5.29
  15   0  -5   -3.27    6.05
  15   0  -4   53.27    9.04
  15   0  -3   -3.24    5.36
  15   0  -2 1121.32   35.21
  15   0  -1    3.59    6.33
  15   0   0  271.11   17.81
  15   1 -11    8.60    5.96
  15   1 -10   16.72    6.82
  15   1  -9  165.73   13.65
  15   1  -8  158.73   13.18
  15   1  -7   35.67    7.81
  15   1  -6  323.78   18.27
  15  -1  -6  329.58   17.57
  15  -1  -5   16.83    6.40
  15   1  -5   19.07    6.39
  15   1  -4  168.87   13.59
  15  -1  -4  184.00   13.41
  15   1  -3  223.48   15.84
  15  -1  -3  234.48   15.16
  15  -1  -2   16.64    6.11
  15   1  -2   -8.34    6.01
  15  -1  -1   80.29   10.58
  15   1  -1   70.52   10.02
  15  -1   0  189.91   14.56
  15  -1   1   14.62    6.29
  15  -1   3   11.99    6.57
  15   2 -10   83.98   10.47
  15   2  -9  111.23   11.80
  15   2  -8   42.51    8.34
  15   2  -7   84.48   10.79
  15   2  -6    0.08    5.50
  15   2  -5   67.23    9.97
  15   2  -4  151.81   13.46
  15  -2  -3   45.46    7.27
  15  -2  -2   86.03    9.82
  15  -2  -1   26.41    7.49
  15  -2   0   23.90    6.57
  15  -2   1  136.49   12.31
  15  -2   2   10.67    5.40
  15  -3   1   44.76    7.39
   0   0   0    0.00    0.00


TITL vvm89 in P2(1)/c
REM P2(1)/c (#14 in standard setting)
CELL 0.71073  11.713553  10.340050  17.088153  90.0000 101.0595  90.0000
ZERR    3.00   0.000403   0.000287   0.000600   0.0000   0.0036   0.0000
LATT  1
SYMM -x, y+1/2,-z+1/2
SFAC C H N Cl Ru
UNIT 102.00 180.00 24.00 6.00 6.00
TREF
HKLF 4
END
_computing_structure_solution     'SHELXT 2014/5 (Sheldrick, 2014)'
;
_shelx_hkl_checksum   31556
