# Supplementary material
Source: MDPI journal article supplement (https://www.mdpi.com/2304-6740/9/5/34)
Supplement: s1 [file s1 › inorganics-1184848-supplementary/Comp3.cif]

 
data_mvv571_c
 
_audit_creation_method            'SHELXL-2017/1'
_shelx_SHELXL_version_number      '2017/1'
_chemical_name_systematic         ?
_chemical_name_common             ?
_chemical_melting_point           ?
_chemical_formula_moiety          ?
_chemical_formula_sum
 'C17 H20 Cl2 N2 Ru' 
_chemical_formula_weight          424.32

loop_
 _atom_type_symbol
 _atom_type_description
 _atom_type_scat_dispersion_real
 _atom_type_scat_dispersion_imag
 _atom_type_scat_source
 'C'  'C'   0.0033   0.0016
 'International Tables Vol C Tables 4.2.6.8 and 6.1.1.4'
 'H'  'H'   0.0000   0.0000
 'International Tables Vol C Tables 4.2.6.8 and 6.1.1.4'
 'N'  'N'   0.0061   0.0033
 'International Tables Vol C Tables 4.2.6.8 and 6.1.1.4'
 'O'  'O'   0.0106   0.0060
 'International Tables Vol C Tables 4.2.6.8 and 6.1.1.4'
 'Cl'  'Cl'   0.1484   0.1585
 'International Tables Vol C Tables 4.2.6.8 and 6.1.1.4'
 'Ru'  'Ru'  -1.2594   0.8363
 'International Tables Vol C Tables 4.2.6.8 and 6.1.1.4'
 
_space_group_crystal_system       orthorhombic
_space_group_IT_number            33
_space_group_name_H-M_alt         'P n a 21'
_space_group_name_Hall            'P 2c -2n'
 
_shelx_space_group_comment
;
The symmetry employed for this shelxl refinement is uniquely defined
by the following loop, which should always be used as a source of
symmetry information in preference to the above space-group names.
They are only intended as comments.
;
 
loop_
 _space_group_symop_operation_xyz
 'x, y, z'
 '-x, -y, z+1/2'
 'x+1/2, -y+1/2, z'
 '-x+1/2, y+1/2, z+1/2'
 
_cell_length_a                    6.8320(3)
_cell_length_b                    18.2051(8)
_cell_length_c                    13.6361(5)
_cell_angle_alpha                 90
_cell_angle_beta                  90
_cell_angle_gamma                 90
_cell_volume                      1696.02(12)
_cell_formula_units_Z             4
_cell_measurement_temperature     140(2)
_cell_measurement_reflns_used   5620
_cell_measurement_theta_min     3.1700
_cell_measurement_theta_max     28.7130
 
_exptl_crystal_description        'rhombus'
_exptl_crystal_colour             'red'
_exptl_crystal_density_meas       ?
_exptl_crystal_density_method     ?
_exptl_crystal_density_diffrn     1.662          
_exptl_crystal_F_000              856
_exptl_transmission_factor_min    ?
_exptl_transmission_factor_max    ?
_exptl_crystal_size_max           0.150
_exptl_crystal_size_mid           0.100
_exptl_crystal_size_min           0.015
_exptl_absorpt_coefficient_mu     1.237
_shelx_estimated_absorpt_T_min    ?
_shelx_estimated_absorpt_T_max    ?
_exptl_absorpt_correction_T_min                   0.98693
_exptl_absorpt_correction_T_max                   1.00000
_exptl_absorpt_correction_type            multi-scan
_exptl_absorpt_process_details
;
CrysAlisPro 1.171.40.67a (Rigaku Oxford Diffraction, 2019)
Empirical absorption correction using spherical harmonics,
 implemented in SCALE3 ABSPACK scaling algorithm.
;
_exptl_absorpt_special_details    ?
_diffrn_ambient_temperature       140(2)
_diffrn_radiation_wavelength      0.71073
_diffrn_radiation_type            MoK\a
_diffrn_source                    ?
_diffrn_measurement_device_type 'New Xcalibur, AtlasS2'
_diffrn_measurement_method        ?
_diffrn_detector_area_resol_mean  ?
_diffrn_reflns_number             8203
_diffrn_reflns_av_unetI/netI      0.0258
_diffrn_reflns_av_R_equivalents   0.0210
_diffrn_reflns_limit_h_min        -8
_diffrn_reflns_limit_h_max        7
_diffrn_reflns_limit_k_min        -18
_diffrn_reflns_limit_k_max        24
_diffrn_reflns_limit_l_min        -17
_diffrn_reflns_limit_l_max        13
_diffrn_reflns_theta_min          2.237
_diffrn_reflns_theta_max          28.797
_diffrn_reflns_theta_full         25.500
_diffrn_measured_fraction_theta_max   0.873
_diffrn_measured_fraction_theta_full  0.999
_diffrn_reflns_Laue_measured_fraction_max    0.873
_diffrn_reflns_Laue_measured_fraction_full   0.999
_diffrn_reflns_point_group_measured_fraction_max   0.710
_diffrn_reflns_point_group_measured_fraction_full  0.861
_reflns_number_total              3157
_reflns_number_gt                 3046
_reflns_threshold_expression      'I > 2\s(I)'
_reflns_Friedel_coverage          0.563
_reflns_Friedel_fraction_max      0.533
_reflns_Friedel_fraction_full     0.709
 
_reflns_special_details
;
 Reflections were merged by SHELXL according to the crystal
 class for the calculation of statistics and refinement.
 
 _reflns_Friedel_fraction is defined as the number of unique
 Friedel pairs measured divided by the number that would be
 possible theoretically, ignoring centric projections and
 systematic absences.
;
 
_computing_data_collection        ?
_computing_cell_refinement        ?
_computing_data_reduction         ?
_computing_structure_solution     'SHELXT 2014/5 (Sheldrick, 2014)'
_computing_structure_refinement 'SHELXL-2017/1 (Sheldrick, 2017)'
_computing_molecular_graphics     ?
_computing_publication_material   ?
_refine_special_details           ?
_refine_ls_structure_factor_coef  Fsqd
_refine_ls_matrix_type            full
_refine_ls_weighting_scheme       calc
_refine_ls_weighting_details
'w=1/[\s^2^(Fo^2^)+(0.0158P)^2^+0.3279P] where P=(Fo^2^+2Fc^2^)/3'
_atom_sites_solution_primary      ?
_atom_sites_solution_secondary    ?
_atom_sites_solution_hydrogens    geom
_refine_ls_hydrogen_treatment     constr
_refine_ls_extinction_method      none
_refine_ls_extinction_coef        .
_refine_ls_abs_structure_details
;
 Flack x determined using 1057 quotients [(I+)-(I-)]/[(I+)+(I-)]
 (Parsons, Flack and Wagner, Acta Cryst. B69 (2013) 249-259).
;
_refine_ls_abs_structure_Flack    0.007(18)
_chemical_absolute_configuration  ?
_refine_ls_number_reflns          3157
_refine_ls_number_parameters      202
_refine_ls_number_restraints      1
_refine_ls_R_factor_all           0.0207
_refine_ls_R_factor_gt            0.0193
_refine_ls_wR_factor_ref          0.0406
_refine_ls_wR_factor_gt           0.0401
_refine_ls_goodness_of_fit_ref    1.073
_refine_ls_restrained_S_all       1.073
_refine_ls_shift/su_max           0.000
_refine_ls_shift/su_mean          0.000
 
loop_
 _atom_site_label
 _atom_site_type_symbol
 _atom_site_fract_x
 _atom_site_fract_y
 _atom_site_fract_z
 _atom_site_U_iso_or_equiv
 _atom_site_adp_type
 _atom_site_occupancy
 _atom_site_site_symmetry_order  
 _atom_site_calc_flag
 _atom_site_refinement_flags_posn
 _atom_site_refinement_flags_adp
 _atom_site_refinement_flags_occupancy
 _atom_site_disorder_assembly
 _atom_site_disorder_group
Ru1 Ru 0.35380(3) 0.44077(2) 0.41392(2) 0.01522(7) Uani 1 1 d . . . . .
Cl1 Cl 0.61771(11) 0.44548(4) 0.53343(6) 0.01930(17) Uani 1 1 d . . . . .
Cl2 Cl 0.56508(12) 0.36264(5) 0.31701(6) 0.02449(19) Uani 1 1 d . . . . .
N1 N 0.2716(4) 0.34486(14) 0.49094(19) 0.0172(6) Uani 1 1 d . . . . .
N2 N 0.2047(4) 0.22868(15) 0.5223(2) 0.0244(6) Uani 1 1 d . . . . .
H2 H 0.189221 0.181241 0.512613 0.029 Uiso 1 1 calc R U . . .
C1 C 0.2581(5) 0.27766(18) 0.4548(2) 0.0211(7) Uani 1 1 d . . . . .
H1 H 0.283693 0.265647 0.388274 0.025 Uiso 1 1 calc R U . . .
C2 C 0.2189(5) 0.33913(18) 0.5898(2) 0.0183(7) Uani 1 1 d . . . . .
C3 C 0.1777(5) 0.26513(18) 0.6098(2) 0.0205(7) Uani 1 1 d . . . . .
C4 C 0.1229(5) 0.2410(2) 0.7026(3) 0.0277(9) Uani 1 1 d . . . . .
H4 H 0.097329 0.190660 0.715670 0.033 Uiso 1 1 calc R U . . .
C5 C 0.1075(5) 0.2932(2) 0.7742(3) 0.0307(9) Uani 1 1 d . . . . .
H5 H 0.067955 0.278952 0.838173 0.037 Uiso 1 1 calc R U . . .
C6 C 0.1488(5) 0.3678(2) 0.7553(3) 0.0299(9) Uani 1 1 d . . . . .
H6 H 0.137467 0.402399 0.807141 0.036 Uiso 1 1 calc R U . . .
C7 C 0.2050(5) 0.39192(19) 0.6640(2) 0.0210(7) Uani 1 1 d . . . . .
H7 H 0.233178 0.442203 0.651900 0.025 Uiso 1 1 calc R U . . .
C8 C 0.0713(6) 0.4009(3) 0.2233(3) 0.0382(10) Uani 1 1 d . . . . .
H8A H -0.015644 0.424819 0.175912 0.057 Uiso 1 1 calc R U . . .
H8B H 0.000346 0.361322 0.256676 0.057 Uiso 1 1 calc R U . . .
H8C H 0.184803 0.380399 0.188972 0.057 Uiso 1 1 calc R U . . .
C9 C 0.1390(5) 0.4562(2) 0.2974(3) 0.0254(8) Uani 1 1 d . . . . .
C10 C 0.0490(5) 0.46255(18) 0.3898(2) 0.0242(8) Uani 1 1 d . . . . .
H10 H -0.061109 0.432535 0.404181 0.029 Uiso 1 1 calc R U . . .
C11 C 0.1162(5) 0.51171(18) 0.4614(3) 0.0223(7) Uani 1 1 d . . . . .
H11 H 0.050087 0.514945 0.522585 0.027 Uiso 1 1 calc R U . . .
C12 C 0.2820(6) 0.55669(17) 0.4435(2) 0.0221(8) Uani 1 1 d . . . . .
C13 C 0.3740(5) 0.5510(2) 0.3504(3) 0.0246(8) Uani 1 1 d . . . . .
H13 H 0.483870 0.581122 0.335839 0.030 Uiso 1 1 calc R U . . .
C14 C 0.3050(5) 0.5019(2) 0.2805(2) 0.0269(8) Uani 1 1 d . . . . .
H14 H 0.370676 0.498742 0.219288 0.032 Uiso 1 1 calc R U . . .
C15 C 0.3531(5) 0.60808(19) 0.5226(3) 0.0296(9) Uani 1 1 d . . . . .
H15 H 0.345794 0.581584 0.586732 0.036 Uiso 1 1 calc R U . . .
C16 C 0.5635(6) 0.6346(2) 0.5083(3) 0.0413(10) Uani 1 1 d . . . . .
H16A H 0.602654 0.664678 0.564659 0.062 Uiso 1 1 calc R U . . .
H16B H 0.571764 0.664100 0.448327 0.062 Uiso 1 1 calc R U . . .
H16C H 0.650958 0.592168 0.502883 0.062 Uiso 1 1 calc R U . . .
C17 C 0.2132(7) 0.6743(2) 0.5273(3) 0.0408(10) Uani 1 1 d . . . . .
H17A H 0.246217 0.704795 0.584218 0.061 Uiso 1 1 calc R U . . .
H17B H 0.078099 0.656843 0.533423 0.061 Uiso 1 1 calc R U . . .
H17C H 0.226301 0.703542 0.467295 0.061 Uiso 1 1 calc R U . . .
 
loop_
 _atom_site_aniso_label
 _atom_site_aniso_U_11
 _atom_site_aniso_U_22
 _atom_site_aniso_U_33
 _atom_site_aniso_U_23
 _atom_site_aniso_U_13
 _atom_site_aniso_U_12
Ru1 0.01624(11) 0.01558(11) 0.01386(11) 0.00379(16) 0.00147(13) 0.00077(9)
Cl1 0.0195(4) 0.0175(4) 0.0209(4) -0.0015(4) -0.0028(3) 0.0008(3)
Cl2 0.0257(4) 0.0291(4) 0.0187(4) -0.0006(4) 0.0042(3) 0.0062(4)
N1 0.0197(14) 0.0145(13) 0.0175(13) 0.0025(12) -0.0003(11) -0.0007(11)
N2 0.0231(15) 0.0166(14) 0.0336(16) 0.0043(14) -0.0067(13) -0.0036(12)
C1 0.0184(17) 0.0197(16) 0.0251(16) 0.0006(15) -0.0035(13) -0.0033(14)
C2 0.0143(16) 0.0224(17) 0.0182(15) 0.0069(15) -0.0030(13) 0.0004(14)
C3 0.0137(15) 0.0198(17) 0.0279(18) 0.0080(16) -0.0048(14) -0.0029(14)
C4 0.0182(18) 0.029(2) 0.035(2) 0.0180(19) -0.0058(15) -0.0068(15)
C5 0.0190(19) 0.049(2) 0.0242(19) 0.018(2) 0.0016(14) -0.0010(17)
C6 0.023(2) 0.046(2) 0.0209(17) 0.0010(18) 0.0019(14) 0.0088(17)
C7 0.0203(18) 0.0225(17) 0.0203(17) 0.0032(16) 0.0018(13) 0.0041(14)
C8 0.037(2) 0.051(3) 0.0268(19) -0.005(2) -0.0116(18) 0.001(2)
C9 0.0249(19) 0.030(2) 0.0216(17) 0.0072(17) -0.0067(14) 0.0071(15)
C10 0.0164(16) 0.0230(16) 0.033(2) 0.0083(16) -0.0008(14) 0.0020(14)
C11 0.0221(18) 0.0219(17) 0.0229(16) 0.0071(16) 0.0049(14) 0.0077(15)
C12 0.0248(19) 0.0156(16) 0.026(2) 0.0064(15) -0.0026(14) 0.0071(14)
C13 0.025(2) 0.0226(19) 0.026(2) 0.0142(17) 0.0012(15) -0.0009(15)
C14 0.029(2) 0.034(2) 0.0182(16) 0.0126(17) 0.0013(14) 0.0093(16)
C15 0.043(2) 0.0160(16) 0.030(2) 0.0056(17) -0.0044(16) 0.0012(15)
C16 0.047(3) 0.0213(18) 0.056(3) 0.001(2) -0.015(2) -0.0045(18)
C17 0.061(3) 0.0201(19) 0.041(2) 0.002(2) 0.001(2) 0.0103(19)
 
_geom_special_details
;
 All esds (except the esd in the dihedral angle between two l.s. planes)
 are estimated using the full covariance matrix.  The cell esds are taken
 into account individually in the estimation of esds in distances, angles
 and torsion angles; correlations between esds in cell parameters are only
 used when they are defined by crystal symmetry.  An approximate (isotropic)
 treatment of cell esds is used for estimating esds involving l.s. planes.
;
 
loop_
 _geom_bond_atom_site_label_1
 _geom_bond_atom_site_label_2
 _geom_bond_distance
 _geom_bond_site_symmetry_2
 _geom_bond_publ_flag
Ru1 N1 2.114(3) . ?
Ru1 C10 2.145(3) . ?
Ru1 C14 2.159(3) . ?
Ru1 C11 2.173(3) . ?
Ru1 C9 2.181(3) . ?
Ru1 C13 2.191(3) . ?
Ru1 C12 2.204(3) . ?
Ru1 Cl2 2.4193(8) . ?
Ru1 Cl1 2.4319(8) . ?
N1 C1 1.322(4) . ?
N1 C2 1.399(4) . ?
N2 C1 1.332(4) . ?
N2 C3 1.377(5) . ?
N2 H2 0.8800 . ?
C1 H1 0.9500 . ?
C2 C7 1.399(5) . ?
C2 C3 1.403(5) . ?
C3 C4 1.392(5) . ?
C4 C5 1.366(5) . ?
C4 H4 0.9500 . ?
C5 C6 1.411(6) . ?
C5 H5 0.9500 . ?
C6 C7 1.374(5) . ?
C6 H6 0.9500 . ?
C7 H7 0.9500 . ?
C8 C9 1.499(5) . ?
C8 H8A 0.9800 . ?
C8 H8B 0.9800 . ?
C8 H8C 0.9800 . ?
C9 C10 1.407(5) . ?
C9 C14 1.426(5) . ?
C10 C11 1.402(5) . ?
C10 H10 0.9500 . ?
C11 C12 1.419(5) . ?
C11 H11 0.9500 . ?
C12 C13 1.419(5) . ?
C12 C15 1.508(5) . ?
C13 C14 1.390(5) . ?
C13 H13 0.9500 . ?
C14 H14 0.9500 . ?
C15 C16 1.529(5) . ?
C15 C17 1.540(5) . ?
C15 H15 1.0000 . ?
C16 H16A 0.9800 . ?
C16 H16B 0.9800 . ?
C16 H16C 0.9800 . ?
C17 H17A 0.9800 . ?
C17 H17B 0.9800 . ?
C17 H17C 0.9800 . ?
 
loop_
 _geom_angle_atom_site_label_1
 _geom_angle_atom_site_label_2
 _geom_angle_atom_site_label_3
 _geom_angle
 _geom_angle_site_symmetry_1
 _geom_angle_site_symmetry_3
 _geom_angle_publ_flag
N1 Ru1 C10 88.33(11) . . ?
N1 Ru1 C14 143.49(13) . . ?
C10 Ru1 C14 68.01(13) . . ?
N1 Ru1 C11 98.29(11) . . ?
C10 Ru1 C11 37.88(12) . . ?
C14 Ru1 C11 80.17(13) . . ?
N1 Ru1 C9 106.82(12) . . ?
C10 Ru1 C9 37.95(12) . . ?
C14 Ru1 C9 38.36(13) . . ?
C11 Ru1 C9 68.79(13) . . ?
N1 Ru1 C13 165.98(13) . . ?
C10 Ru1 C13 80.29(13) . . ?
C14 Ru1 C13 37.26(14) . . ?
C11 Ru1 C13 67.69(13) . . ?
C9 Ru1 C13 68.71(14) . . ?
N1 Ru1 C12 129.88(12) . . ?
C10 Ru1 C12 68.59(13) . . ?
C14 Ru1 C12 68.01(13) . . ?
C11 Ru1 C12 37.84(13) . . ?
C9 Ru1 C12 81.98(13) . . ?
C13 Ru1 C12 37.68(13) . . ?
N1 Ru1 Cl2 86.80(7) . . ?
C10 Ru1 Cl2 127.18(9) . . ?
C14 Ru1 Cl2 86.29(10) . . ?
C11 Ru1 Cl2 163.32(10) . . ?
C9 Ru1 Cl2 94.54(10) . . ?
C13 Ru1 Cl2 106.58(11) . . ?
C12 Ru1 Cl2 142.71(10) . . ?
N1 Ru1 Cl1 83.87(8) . . ?
C10 Ru1 Cl1 144.67(9) . . ?
C14 Ru1 Cl1 131.38(10) . . ?
C11 Ru1 Cl1 109.45(10) . . ?
C9 Ru1 Cl1 169.28(10) . . ?
C13 Ru1 Cl1 100.70(10) . . ?
C12 Ru1 Cl1 90.50(9) . . ?
Cl2 Ru1 Cl1 86.81(3) . . ?
C1 N1 C2 105.8(3) . . ?
C1 N1 Ru1 126.7(2) . . ?
C2 N1 Ru1 127.5(2) . . ?
C1 N2 C3 108.2(3) . . ?
C1 N2 H2 125.9 . . ?
C3 N2 H2 125.9 . . ?
N1 C1 N2 112.4(3) . . ?
N1 C1 H1 123.8 . . ?
N2 C1 H1 123.8 . . ?
C7 C2 N1 131.6(3) . . ?
C7 C2 C3 120.4(3) . . ?
N1 C2 C3 108.1(3) . . ?
N2 C3 C4 132.2(3) . . ?
N2 C3 C2 105.5(3) . . ?
C4 C3 C2 122.2(3) . . ?
C5 C4 C3 116.8(3) . . ?
C5 C4 H4 121.6 . . ?
C3 C4 H4 121.6 . . ?
C4 C5 C6 121.6(3) . . ?
C4 C5 H5 119.2 . . ?
C6 C5 H5 119.2 . . ?
C7 C6 C5 121.9(4) . . ?
C7 C6 H6 119.0 . . ?
C5 C6 H6 119.0 . . ?
C6 C7 C2 117.1(3) . . ?
C6 C7 H7 121.5 . . ?
C2 C7 H7 121.5 . . ?
C9 C8 H8A 109.5 . . ?
C9 C8 H8B 109.5 . . ?
H8A C8 H8B 109.5 . . ?
C9 C8 H8C 109.5 . . ?
H8A C8 H8C 109.5 . . ?
H8B C8 H8C 109.5 . . ?
C10 C9 C14 116.3(3) . . ?
C10 C9 C8 121.6(3) . . ?
C14 C9 C8 121.9(3) . . ?
C10 C9 Ru1 69.65(19) . . ?
C14 C9 Ru1 69.97(19) . . ?
C8 C9 Ru1 127.8(3) . . ?
C11 C10 C9 122.2(3) . . ?
C11 C10 Ru1 72.15(19) . . ?
C9 C10 Ru1 72.39(19) . . ?
C11 C10 H10 118.9 . . ?
C9 C10 H10 118.9 . . ?
Ru1 C10 H10 129.1 . . ?
C10 C11 C12 120.6(3) . . ?
C10 C11 Ru1 69.98(19) . . ?
C12 C11 Ru1 72.24(19) . . ?
C10 C11 H11 119.7 . . ?
C12 C11 H11 119.7 . . ?
Ru1 C11 H11 130.8 . . ?
C13 C12 C11 117.8(3) . . ?
C13 C12 C15 122.8(3) . . ?
C11 C12 C15 119.4(3) . . ?
C13 C12 Ru1 70.7(2) . . ?
C11 C12 Ru1 69.92(18) . . ?
C15 C12 Ru1 130.8(2) . . ?
C14 C13 C12 120.6(3) . . ?
C14 C13 Ru1 70.12(19) . . ?
C12 C13 Ru1 71.66(19) . . ?
C14 C13 H13 119.7 . . ?
C12 C13 H13 119.7 . . ?
Ru1 C13 H13 131.4 . . ?
C13 C14 C9 122.4(3) . . ?
C13 C14 Ru1 72.6(2) . . ?
C9 C14 Ru1 71.7(2) . . ?
C13 C14 H14 118.8 . . ?
C9 C14 H14 118.8 . . ?
Ru1 C14 H14 129.5 . . ?
C12 C15 C16 114.1(3) . . ?
C12 C15 C17 108.4(3) . . ?
C16 C15 C17 109.9(3) . . ?
C12 C15 H15 108.1 . . ?
C16 C15 H15 108.1 . . ?
C17 C15 H15 108.1 . . ?
C15 C16 H16A 109.5 . . ?
C15 C16 H16B 109.5 . . ?
H16A C16 H16B 109.5 . . ?
C15 C16 H16C 109.5 . . ?
H16A C16 H16C 109.5 . . ?
H16B C16 H16C 109.5 . . ?
C15 C17 H17A 109.5 . . ?
C15 C17 H17B 109.5 . . ?
H17A C17 H17B 109.5 . . ?
C15 C17 H17C 109.5 . . ?
H17A C17 H17C 109.5 . . ?
H17B C17 H17C 109.5 . . ?
 
_refine_diff_density_max    0.322
_refine_diff_density_min   -0.302
_refine_diff_density_rms    0.058

_shelx_res_file
;
TITL mvv571 in Pna2(1); 140K; Xcalibur
    mvv571_c.res
    created by SHELXL-2017/1 at 16:44:51 on 27-Feb-2020
CELL  0.71073   6.8320  18.2051  13.6361   90.000   90.000   90.000
ZERR    4.000   0.0003   0.0008   0.0005    0.000    0.000    0.000
LATT -1
SYMM -X, -Y, 1/2+Z
SYMM 1/2+X, 1/2-Y, Z
SYMM 1/2-X, 1/2+Y, 1/2+Z
SFAC C  H  N O CL RU
UNIT 68 80 8 0 8  4
LIST 4 ! automatically inserted. Change 6 to 4 for CHECKCIF!!
TEMP -133
L.S. 6
BOND $H
FMAP 2
PLAN 5
OMIT 0
ACTA 51
WGHT    0.015800    0.327900
FVAR       0.44400
RU1   6    0.353801    0.440766    0.413917    11.00000    0.01624    0.01558 =
         0.01386    0.00379    0.00147    0.00077
CL1   5    0.617707    0.445478    0.533428    11.00000    0.01952    0.01748 =
         0.02091   -0.00148   -0.00284    0.00085
CL2   5    0.565080    0.362637    0.317010    11.00000    0.02568    0.02914 =
         0.01865   -0.00058    0.00419    0.00621
N1    3    0.271601    0.344856    0.490938    11.00000    0.01967    0.01447 =
         0.01749    0.00245   -0.00029   -0.00069
N2    3    0.204666    0.228681    0.522279    11.00000    0.02315    0.01656 =
         0.03363    0.00425   -0.00670   -0.00361
AFIX  43
H2    2    0.189221    0.181241    0.512613    11.00000   -1.20000
AFIX   0
C1    1    0.258120    0.277660    0.454849    11.00000    0.01840    0.01970 =
         0.02512    0.00061   -0.00350   -0.00333
AFIX  43
H1    2    0.283693    0.265647    0.388274    11.00000   -1.20000
AFIX   0
C2    1    0.218940    0.339133    0.589800    11.00000    0.01430    0.02239 =
         0.01820    0.00695   -0.00305    0.00040
C3    1    0.177745    0.265131    0.609758    11.00000    0.01371    0.01978 =
         0.02790    0.00802   -0.00481   -0.00290
C4    1    0.122860    0.241020    0.702643    11.00000    0.01817    0.02950 =
         0.03541    0.01800   -0.00585   -0.00676
AFIX  43
H4    2    0.097329    0.190660    0.715670    11.00000   -1.20000
AFIX   0
C5    1    0.107468    0.293220    0.774150    11.00000    0.01904    0.04875 =
         0.02420    0.01772    0.00163   -0.00095
AFIX  43
H5    2    0.067955    0.278952    0.838173    11.00000   -1.20000
AFIX   0
C6    1    0.148817    0.367826    0.755268    11.00000    0.02298    0.04566 =
         0.02095    0.00101    0.00192    0.00877
AFIX  43
H6    2    0.137467    0.402399    0.807141    11.00000   -1.20000
AFIX   0
C7    1    0.205014    0.391917    0.664039    11.00000    0.02029    0.02250 =
         0.02034    0.00320    0.00183    0.00412
AFIX  43
H7    2    0.233178    0.442203    0.651900    11.00000   -1.20000
AFIX   0
C8    1    0.071263    0.400891    0.223331    11.00000    0.03688    0.05097 =
         0.02680   -0.00534   -0.01158    0.00125
AFIX 137
H8A   2   -0.015644    0.424819    0.175912    11.00000   -1.50000
H8B   2    0.000346    0.361322    0.256676    11.00000   -1.50000
H8C   2    0.184803    0.380399    0.188972    11.00000   -1.50000
AFIX   0
C9    1    0.138992    0.456153    0.297405    11.00000    0.02487    0.02970 =
         0.02156    0.00717   -0.00666    0.00707
C10   1    0.048968    0.462551    0.389827    11.00000    0.01637    0.02302 =
         0.03314    0.00834   -0.00077    0.00200
AFIX  43
H10   2   -0.061109    0.432535    0.404181    11.00000   -1.20000
AFIX   0
C11   1    0.116176    0.511707    0.461442    11.00000    0.02211    0.02191 =
         0.02289    0.00707    0.00488    0.00774
AFIX  43
H11   2    0.050087    0.514945    0.522585    11.00000   -1.20000
AFIX   0
C12   1    0.282044    0.556686    0.443455    11.00000    0.02484    0.01558 =
         0.02580    0.00636   -0.00260    0.00708
C13   1    0.374042    0.551044    0.350441    11.00000    0.02502    0.02261 =
         0.02612    0.01417    0.00116   -0.00094
AFIX  43
H13   2    0.483870    0.581122    0.335839    11.00000   -1.20000
AFIX   0
C14   1    0.304957    0.501933    0.280536    11.00000    0.02876    0.03381 =
         0.01823    0.01263    0.00131    0.00927
AFIX  43
H14   2    0.370676    0.498742    0.219288    11.00000   -1.20000
AFIX   0
C15   1    0.353068    0.608081    0.522597    11.00000    0.04257    0.01595 =
         0.03033    0.00560   -0.00438    0.00123
AFIX  13
H15   2    0.345794    0.581584    0.586732    11.00000   -1.20000
AFIX   0
C16   1    0.563507    0.634642    0.508336    11.00000    0.04651    0.02129 =
         0.05597    0.00136   -0.01508   -0.00446
AFIX 137
H16A  2    0.602654    0.664678    0.564659    11.00000   -1.50000
H16B  2    0.571764    0.664100    0.448327    11.00000   -1.50000
H16C  2    0.650958    0.592168    0.502883    11.00000   -1.50000
AFIX   0
C17   1    0.213203    0.674340    0.527312    11.00000    0.06116    0.02010 =
         0.04128    0.00186    0.00073    0.01026
AFIX 137
H17A  2    0.246217    0.704795    0.584218    11.00000   -1.50000
H17B  2    0.078099    0.656843    0.533423    11.00000   -1.50000
H17C  2    0.226301    0.703542    0.467295    11.00000   -1.50000
AFIX   0
HKLF 4


REM  mvv571 in Pna2(1); 140K; Xcalibur
REM R1 =  0.0193 for    3046 Fo > 4sig(Fo)  and  0.0207 for all    3157 data
REM    202 parameters refined using      1 restraints

END

WGHT      0.0158      0.3279

REM Highest difference peak  0.322,  deepest hole -0.302,  1-sigma level  0.058
Q1    1   0.4757  0.4712  0.4147  11.00000  0.05    0.32
Q2    1   0.3536  0.4244  0.3418  11.00000  0.05    0.26
Q3    1   0.2397  0.2979  0.6164  11.00000  0.05    0.26
Q4    1   0.0766  0.5061  0.4125  11.00000  0.05    0.25
Q5    1   0.5118  0.5124  0.3646  11.00000  0.05    0.24
;
_shelx_res_checksum    5658

_shelx_hkl_file
;
   0   0 -17    6.17    5.28
   0   0 -16  741.72   30.76
   0   0 -16  797.41   25.18
   0   0 -15   -0.75    4.78
   0   0 -15    1.11    2.60
   0   0 -14  349.05   14.94
   0   0 -14  297.94   17.65
   0   0 -13   -1.64    3.03
   0   0 -13    0.17    4.04
   0   0 -12  545.63   17.73
   0   0 -12  518.74   21.18
   0   0 -11    3.19    4.26
   0   0 -11    2.46    2.40
   0   0 -10 3355.90   61.75
   0   0 -10 3356.65   55.38
   0   0  -9    6.39    3.37
   0   0  -9    4.00    2.13
   0   0  -8 3928.66   60.18
   0   0  -8 3925.08   65.23
   0   0  -7   -0.27    2.83
   0   0  -7   -0.64    1.92
   0   0  -6  720.51   15.89
   0   0  -6  735.06   18.49
   0   0  -5    2.26    1.85
   0   0  -4  701.28   13.64
   0   0  -3    2.56    1.61
   0   0  -2 9669.36  123.25
   0   0   2 9999.00  127.34
   0   0   3    1.66    1.33
   0   0   4  802.28   14.96
   0   0   5    1.75    1.66
   0   0   6  711.32   15.66
   0   0   7    2.14    1.98
   0   0   8 3712.05   57.47
   0  -1 -17   93.24   11.67
   0   1 -17  100.69   11.83
   0   1 -16   -0.25    4.47
   0   1 -16    2.21    2.95
   0  -1 -16    3.20    5.27
   0   1 -15   25.91    4.95
   0  -1 -15   28.28    7.22
   0   1 -15   39.49    8.07
   0  -1 -15   23.27    4.26
   0   1 -14    2.39    2.70
   0   1 -14   -2.36    4.26
   0  -1 -14    1.71    4.61
   0  -1 -14   -0.13    2.48
   0   1 -13  145.99    9.62
   0  -1 -13  135.32    8.65
   0   1 -13  124.77   10.85
   0  -1 -13  139.84   11.58
   0  -1 -12    4.70    2.71
   0   1 -12    4.83    3.09
   0  -1 -12   11.63    4.75
   0   1 -12    0.60    3.38
   0   1 -11  783.39   21.79
   0   1 -11  797.37   25.44
   0  -1 -11  773.84   20.28
   0  -1 -11  786.71   25.42
   0  -1 -10    5.69    3.76
   0  -1 -10    2.35    2.20
   0   1 -10    5.08    3.79
   0   1 -10    4.45    2.69
   0  -1  -9  535.39   18.56
   0  -1  -9  533.50   14.78
   0   1  -9  531.69   16.00
   0   1  -9  548.32   18.62
   0  -1  -8    0.89    2.83
   0   1  -8    2.59    2.57
   0  -1  -8    2.47    1.74
   0  -1  -7  218.44   10.27
   0  -1  -7  203.04    7.59
   0   1  -7  203.12    8.49
   0   1  -6    0.69    2.03
   0  -1  -6   -0.58    1.61
   0  -1  -6    4.81    3.01
   0   1  -5  129.83    5.95
   0  -1  -5  148.19    7.22
   0  -1  -5  136.18    5.15
   0  -1  -4   -0.32    1.31
   0   1  -4    3.88    2.13
   0  -1  -4    5.76    2.62
   0  -1  -3  983.01   18.09
   0  -1  -3  978.17   15.19
   0   1  -3  985.73   17.21
   0   1  -2    0.52    1.22
   0  -1  -2    2.25    1.52
   0   1   2    0.68    1.30
   0  -1   2    1.69    1.31
   0   1   3  941.56   14.77
   0  -1   3  957.01   16.74
   0   1   3  958.79   17.61
   0  -1   4    0.83    1.96
   0   1   4    2.06    1.52
   0  -1   5  135.53    6.00
   0   1   5  129.97    5.01
   0  -1   6    1.96    1.80
   0   1   6    2.89    1.63
   0  -1   7  231.05    9.11
   0  -1   8    2.55    2.53
   0  -1   9  545.99   16.20
   0   2 -17   -2.31    4.75
   0  -2 -17    5.46    5.83
   0   2 -16  663.64   28.71
   0  -2 -16  604.65   27.90
   0   2 -16  647.66   24.01
   0  -2 -15   -1.01    2.56
   0   2 -15    2.31    4.19
   0  -2 -15   -3.89    5.00
   0   2 -15   -4.09    3.69
   0   2 -14  293.48   14.71
   0  -2 -14  303.97   12.79
   0  -2 -14  310.23   17.90
   0   2 -14  287.69   17.29
   0   2 -13    3.10    4.05
   0  -2 -13   -0.83    2.33
   0   2 -13   -1.75    2.86
   0  -2 -13   -0.71    4.45
   0  -2 -12  235.81   10.28
   0  -2 -12  220.74   13.70
   0   2 -12  237.03   12.24
   0   2 -12  241.68   14.20
   0   2 -11    7.76    3.52
   0  -2 -11    0.35    3.72
   0   2 -11    8.63    4.29
   0  -2 -11    0.63    1.87
   0  -2 -10  571.81   15.36
   0  -2 -10  557.50   20.23
   0   2 -10  568.00   17.96
   0   2  -9    0.69    2.33
   0  -2  -9    1.19    1.60
   0  -2  -9   -0.03    2.87
   0   2  -8 2550.36   44.90
   0  -2  -8 2607.01   40.81
   0  -2  -8 2600.46   48.21
   0  -2  -7    1.20    2.68
   0  -2  -7    0.02    1.47
   0   2  -7    0.03    2.31
   0  -2  -6 1517.42   24.76
   0   2  -6 1539.70   28.68
   0  -2  -6 1551.49   30.72
   0  -2  -5    0.06    1.16
   0   2  -5    0.72    2.19
   0  -2  -5   -0.87    2.47
   0  -2  -4 1876.25   31.63
   0  -2  -4 1811.74   26.09
   0   2  -4 1869.65   30.53
   0  -2  -3   -0.44    2.18
   0   2  -3    8.90    2.31
   0   2  -2 6350.61   84.45
   0   2  -1    0.21    1.16
   0  -2   0 4396.49   57.15
   0  -2   1    1.14    1.36
   0  -2   2 6190.43   82.63
   0   2   2 6248.24   83.06
   0  -2   3    1.84    1.92
   0   2   3    2.36    2.02
   0  -2   4 1846.18   30.37
   0   2   4 1840.76   31.34
   0   2   5    1.64    2.41
   0  -2   5    4.01    2.17
   0  -2   6 1512.51   28.42
   0  -2   7   -0.54    2.09
   0  -2   8 2562.18   44.79
   0  -2   9    0.42    2.09
   0  -2  10  592.57   18.41
   0   3 -17  522.18   22.74
   0   3 -17  527.19   26.62
   0   3 -16   -2.89    3.66
   0  -3 -16    4.16    4.89
   0   3 -16   -1.08    4.32
   0   3 -15  657.14   24.19
   0   3 -15  679.97   28.16
   0  -3 -15  662.17   28.07
   0  -3 -14   -2.74    2.28
   0   3 -14    3.46    4.22
   0  -3 -14   -4.88    4.91
   0   3 -14   -2.75    3.27
   0   3 -13  558.87   23.22
   0  -3 -13  571.68   23.93
   0  -3 -13  592.53   17.00
   0  -3 -13  604.39   17.18
   0   3 -13  577.26   21.00
   0  -3 -12   -0.54    2.02
   0  -3 -12    1.71    3.70
   0   3 -12   -0.69    2.68
   0   3 -12    0.95    3.48
   0  -3 -11 1322.37   35.07
   0  -3 -11 1311.99   26.28
   0   3 -11 1352.31   32.08
   0  -3 -10   -0.71    2.33
   0  -3 -10    1.58    3.41
   0   3 -10    1.75    2.78
   0   3  -9 3277.84   55.98
   0  -3  -9 3189.03   49.08
   0  -3  -9 3314.90   59.46
   0   3  -8    2.69    2.62
   0  -3  -8    2.59    3.31
   0  -3  -8    0.51    1.25
   0  -3  -7 2685.30   39.46
   0   3  -7 2699.54   46.14
   0  -3  -7 2672.05   48.20
   0   3  -6    2.99    2.57
   0  -3  -6    3.34    1.42
   0  -3  -6    2.44    2.78
   0   3  -5 1955.83   33.73
   0  -3  -5 1931.92   34.78
   0  -3  -5 1902.81   27.23
   0   3  -4    4.00    2.62
   0   3  -3 1242.76   22.49
   0   3  -2   -0.24    1.87
   0   3  -1 5367.48   71.52
   0  -3  -1 5321.73   68.56
   0   3   0    1.45    1.21
   0  -3   0    0.79    1.14
   0   3   1 5075.38   65.51
   0  -3   1 5118.48   68.34
   0  -3   2    3.16    2.05
   0  -3   3 1168.71   21.51
   0   3   3 1189.29   21.90
   0   3   4    0.64    2.01
   0  -3   4   -0.15    2.30
   0   3   5 1958.31   35.22
   0  -3   5 1983.34   34.23
   0   3   6    1.66    2.19
   0  -3   6    4.85    2.50
   0  -3   7 2635.92   45.61
   0  -3   8   -0.94    1.99
   0  -3   9 3393.65   58.03
   0  -3  10    1.94    2.31
   0   4 -17    1.66    5.24
   0   4 -17   10.38    5.68
   0   4 -16  124.68   11.14
   0   4 -16  133.52   13.16
   0   4 -15   -0.37    3.67
   0   4 -15   12.50    5.87
   0  -4 -14  109.15    6.65
   0   4 -14   93.68   10.34
   0   4 -14  106.26    9.64
   0  -4 -14   94.57   10.80
   0  -4 -13    2.29    2.23
   0  -4 -13    0.73    3.78
   0   4 -13   -0.35    3.05
   0  -4 -12  544.18   14.52
   0  -4 -12  515.67   14.23
   0  -4 -12  517.25   21.78
   0   4 -12  522.07   19.65
   0  -4 -11    1.46    3.58
   0  -4 -11    1.56    1.45
   0  -4 -11   -0.04    1.65
   0   4 -11    5.24    3.31
   0   4 -10   82.57    7.25
   0  -4 -10   72.86    4.41
   0  -4 -10   69.85    7.41
   0  -4 -10   71.99    4.42
   0  -4  -9    4.40    1.60
   0   4  -9   14.73    4.12
   0  -4  -9    3.65    3.62
   0  -4  -9    5.69    1.73
   0   4  -8   44.90    5.14
   0  -4  -8   30.53    4.92
   0  -4  -8   35.80    2.63
   0  -4  -8   34.46    2.56
   0   4  -7    5.01    3.41
   0  -4  -7    0.31    2.78
   0  -4  -7    2.90    1.31
   0  -4  -7    1.67    1.07
   0  -4  -6  644.75   11.01
   0  -4  -6  632.87   10.95
   0   4  -6  687.19   17.86
   0   4  -5   -1.35    3.69
   0   4  -4  690.43   16.48
   0   4  -3    2.06    2.36
   0   4  -2  338.84    9.60
   0  -4  -1    2.76    1.20
   0   4  -1    5.54    2.17
   0   4   0   48.03    3.04
   0  -4   0   71.92    3.38
   0  -4   1    1.62    1.79
   0   4   1    3.22    1.31
   0  -4   2  341.78    9.49
   0  -4   3    3.82    2.71
   0  -4   4  673.83   16.11
   0   4   4  656.21   16.39
   0   4   5   -0.95    2.24
   0  -4   5    4.57    2.54
   0   4   6  661.48   18.45
   0  -4   6  654.13   17.67
   0   4   7    3.16    2.81
   0  -4   7    3.81    2.82
   0  -4   8   37.89    4.79
   0  -4   9    4.89    2.93
   0  -4  10   85.68    7.31
   0  -4  11    4.84    3.43
   0   5 -17  890.16   31.97
   0   5 -16    2.59    4.07
   0   5 -16   -1.48    5.13
   0   5 -15  879.78   32.44
   0   5 -15  847.40   29.36
   0   5 -14    1.90    3.51
   0  -5 -13  167.57    7.13
   0   5 -13  167.00   11.83
   0  -5 -12    0.23    1.41
   0   5 -12   -2.02    3.33
   0  -5 -12   -1.50    1.23
   0   5 -11  725.46   23.58
   0  -5 -11  730.27   15.59
   0  -5 -11  762.98   15.77
   0  -5 -10    2.10    1.41
   0   5 -10    0.08    2.94
   0  -5 -10    1.34    1.39
   0   5  -9 3121.85   56.70
   0  -5  -9 3149.39   44.60
   0  -5  -9 3138.33   44.50
   0   5  -8   -2.43    2.74
   0  -5  -8    1.76    0.94
   0  -5  -8    3.32    1.11
   0  -5  -7 6802.69   87.52
   0  -5  -7 6795.75   87.45
   0   5  -7 6941.76  101.14
   0   5  -6    1.08    2.85
   0   5  -5 2040.93   37.16
   0   5  -4    1.25    2.64
   0   5  -3 2830.92   44.94
   0   5  -2    1.66    2.43
   0  -5  -2    1.85    1.00
   0  -5  -1 6219.72   82.35
   0   5  -1 6308.21   85.42
   0  -5   0    6.51    2.04
   0   5   0    3.49    1.94
   0   5   1 6422.47   84.72
   0  -5   1 6457.98   87.52
   0   5   2    1.70    1.04
   0  -5   2    3.61    2.42
   0  -5   3 2928.31   46.24
   0   5   4    0.28    1.77
   0  -5   4   -0.33    2.17
   0  -5   5 2046.06   36.98
   0   5   5 2029.91   37.56
   0   5   6    1.33    2.43
   0  -5   6    3.91    2.77
   0   5   7 6835.17  102.76
   0  -5   7 6843.47  101.61
   0   5   8    7.72    3.59
   0  -5   8   -1.11    2.48
   0  -5   9 3143.15   56.88
   0  -5  10    7.34    3.37
   0   6 -17    7.62    5.52
   0   6 -16  341.38   19.05
   0   6 -16  369.13   21.57
   0   6 -15    8.02    4.38
   0   6 -14  185.17   13.36
   0   6 -13    1.25    3.94
   0  -6 -12  120.65    4.64
   0  -6 -12  109.96    4.48
   0   6 -12  111.91    9.76
   0  -6 -11    0.70    1.04
   0   6 -11    7.15    3.71
   0  -6 -11    2.53    1.07
   0  -6 -10  721.85   12.36
   0  -6 -10  722.35   12.42
   0   6 -10  679.36   22.64
   0   6  -9    6.31    3.56
   0   6  -8  958.12   25.51
   0   6  -7    2.06    3.15
   0   6  -6 1571.38   32.68
   0   6  -5    3.34    3.06
   0   6  -4 2687.36   45.46
   0  -6  -3    0.73    0.81
   0   6  -3    2.81    2.57
   0  -6  -2  487.16    9.57
   0   6  -2  503.37   13.36
   0   6  -1    1.52    2.11
   0  -6  -1   -0.90    1.47
   0  -6   0 1696.85   27.59
   0   6   0 1678.03   27.68
   0   6   1    2.20    1.73
   0  -6   1    5.74    2.24
   0  -6   2  497.50   13.34
   0   6   2  503.90    9.76
   0   6   3    0.43    0.78
   0  -6   3    0.94    2.40
   0  -6   4 2648.65   44.82
   0  -6   5    1.95    2.31
   0   6   5   -0.69    2.25
   0  -6   6 1473.24   31.58
   0   6   6 1533.92   32.61
   0  -6   7    4.27    3.42
   0   6   7    1.80    2.48
   0  -6   8  977.20   25.92
   0   6   8  947.00   26.30
   0  -6   9    4.75    3.25
   0   7 -17  210.01   15.95
   0   7 -16    4.32    4.51
   0   7 -16    9.41    5.79
   0   7 -15  129.94   12.06
   0   7 -14    2.61    4.28
   0   7 -13  180.21   13.02
   0   7 -12    4.03    3.56
   0   7 -11  246.20   14.02
   0   7 -10    4.25    3.84
   0   7  -9  937.39   26.78
   0   7  -8    3.11    3.30
   0   7  -7  993.08   25.86
   0   7  -6    3.35    3.12
   0   7  -5  398.72   14.20
   0   7  -4    2.19    2.83
   0   7  -3  588.53   15.93
   0  -7  -3  543.34   10.04
   0  -7  -2    1.29    1.29
   0   7  -2    0.14    2.46
   0   7  -1 1155.45   22.40
   0  -7  -1 1116.04   20.07
   0   7   0    0.98    2.12
   0  -7   0    1.70    1.83
   0  -7   1 1098.58   21.91
   0   7   1 1112.51   19.91
   0  -7   2    0.84    2.13
   0   7   2    2.08    1.46
   0  -7   3  591.29   16.24
   0   7   3  604.43   10.77
   0  -7   4    2.52    2.42
   0   7   5  416.32   14.74
   0  -7   5  395.19   14.20
   0  -7   6    1.41    2.90
   0   7   6    6.52    2.95
   0  -7   7 1049.28   26.76
   0   7   7 1039.36   27.27
   0   7   8    3.37    2.55
   0  -7   8    0.03    2.56
   0   8 -17   -0.68    5.04
   0   8 -16  962.76   34.79
   0   8 -15    0.62    4.87
   0   8 -14  729.64   28.15
   0   8 -13   -3.01    4.23
   0   8 -12  317.96   17.06
   0   8 -11    4.51    3.69
   0   8 -10  741.37   24.79
   0   8  -9    3.28    3.63
   0   8  -8 2420.52   48.63
   0   8  -7    0.97    2.84
   0   8  -6 3119.71   55.66
   0   8  -5    1.18    2.87
   0   8  -4 2379.70   43.33
   0  -8  -3    4.76    1.44
   0   8  -3    3.52    3.10
   0   8  -2 4897.14   71.13
   0  -8  -2 4605.33   65.00
   0  -8  -1    2.31    1.86
   0   8  -1    6.89    2.97
   0   8   0 1723.22   30.02
   0  -8   0 1704.00   29.78
   0  -8   1    2.95    2.52
   0   8   1   71.35    4.82
   0  -8   2 4835.90   72.43
   0   8   2 4858.99   66.95
   0  -8   3    0.80    2.43
   0   8   3    3.65    1.37
   0   8   4 2261.28   31.07
   0  -8   4 2308.29   42.11
   0  -8   5    3.46    2.63
   0   8   6 3103.18   56.65
   0  -8   6 3166.64   56.29
   0   8   7    3.07    2.57
   0  -8   7    4.62    3.02
   0   9 -16   -7.80    4.83
   0   9 -15  116.76   12.04
   0   9 -14   -2.78    4.82
   0   9 -13  123.01   11.62
   0   9 -12    0.10    4.28
   0   9 -11   18.88    5.58
   0   9 -10    5.86    4.15
   0   9  -9   19.95    4.99
   0   9  -8   -0.71    3.31
   0   9  -7  359.97   15.54
   0   9  -6    2.10    3.15
   0   9  -5  770.93   22.00
   0   9  -4    3.71    3.15
   0  -9  -3  653.27   13.18
   0   9  -3  679.80   18.75
   0   9  -2    1.20    2.70
   0  -9  -2   -0.62    1.56
   0  -9  -1  127.84    6.06
   0   9  -1  127.08    6.98
   0   9   0    0.45    2.10
   0  -9   0    1.09    1.94
   0  -9   1  148.82    7.44
   0   9   1  136.91    6.30
   0   9   2    1.20    1.76
   0  -9   2   -0.67    2.28
   0  -9   3  682.87   19.17
   0   9   3  692.75   13.64
   0   9   4    1.78    0.95
   0  -9   4    4.55    2.98
   0  -9   5  827.75   22.99
   0   9   6    3.61    2.71
   0  -9   6    6.08    3.23
   0  -9   7  347.15   15.34
   0   9   7  331.36   15.23
   0  10 -15    0.52    4.75
   0  10 -14  276.91   17.95
   0  10 -13    2.69    5.27
   0  10 -12  476.43   21.97
   0  10 -11    6.15    4.96
   0  10 -10 1798.77   44.04
   0  10  -9    3.32    3.69
   0  10  -8 1193.87   32.37
   0  10  -7    1.91    3.08
   0  10  -6  655.87   21.44
   0  10  -5    1.72    2.97
   0  10  -4  502.55   17.09
   0 -10  -3    0.97    1.26
   0  10  -3   -0.42    2.75
   0  10  -2 3076.63   51.38
   0 -10  -2 2930.87   45.55
   0 -10  -1    4.75    2.11
   0  10  -1    7.85    3.11
   0 -10   0 6036.86   87.42
   0  10   0 6087.77   87.46
   0 -10   1   11.26    3.07
   0  10   1    7.63    2.64
   0  10   2 3058.28   46.68
   0 -10   2 3090.90   52.16
   0 -10   3    2.43    2.75
   0  10   3    5.16    1.79
   0  10   4  459.07    9.93
   0 -10   4  478.03   16.55
   0 -10   5    3.53    2.57
   0  10   6  647.26   21.54
   0 -10   6  635.03   21.00
   0  11 -15  411.99   22.90
   0  11 -14   -9.74    5.05
   0  11 -13  327.28   19.39
   0  11 -12    3.52    4.32
   0  11 -11  637.31   25.61
   0  11 -10    0.36    4.10
   0  11  -9  991.83   30.59
   0  11  -8   -0.41    3.31
   0  11  -7 1043.78   29.97
   0  11  -6   -0.72    2.95
   0  11  -5  333.64   14.88
   0  11  -4    0.11    2.87
   0  11  -3  533.70   17.54
   0 -11  -3  506.55   12.44
   0 -11  -2    3.51    1.72
   0  11  -2    4.27    2.78
   0 -11  -1 2556.81   43.04
   0  11  -1 2651.54   46.00
   0 -11   0    9.06    2.73
   0  11   0   15.04    3.34
   0  11   1 2715.94   44.63
   0 -11   1 2688.48   47.11
   0  11   2    2.43    1.94
   0 -11   2    1.57    2.68
   0 -11   3  588.87   18.65
   0  11   3  592.29   13.73
   0 -11   4    3.36    2.76
   0  11   4    2.99    1.30
   0  11   5  321.53    6.81
   0 -11   5  334.91   14.71
   0  11   5  318.88    6.86
   0  12 -14   30.64    6.84
   0  12 -13   -3.30    4.08
   0  12 -12   20.37    5.64
   0  12 -11    0.16    4.62
   0  12 -10  241.21   15.24
   0  12  -9   -3.37    3.60
   0  12  -8  433.50   19.30
   0  12  -7    0.71    3.76
   0  12  -6   -0.66    3.29
   0  12  -5    1.41    3.01
   0  12  -4   28.51    5.02
   0  12  -3    4.19    3.24
   0 -12  -2  562.58   14.94
   0  12  -2  568.04   18.08
   0 -12  -1    6.16    2.54
   0  12  -1    2.32    2.74
   0 -12   0  673.10   18.61
   0  12   0  717.45   18.95
   0 -12   1    0.95    2.24
   0  12   1    2.64    2.53
   0 -12   2  543.48   17.80
   0  12   2  547.23   14.68
   0 -12   3   -0.51    2.69
   0  12   3    3.00    1.83
   0 -12   4   19.04    4.13
   0  12   4   23.40    2.55
   0  12   5   -0.15    0.98
   0  13 -13  299.39   19.19
   0  13 -12    7.02    5.56
   0  13 -11  686.27   27.73
   0  13 -10    8.41    4.86
   0  13  -9 2616.84   57.99
   0  13  -8   15.68    5.38
   0  13  -7 1051.40   31.28
   0  13  -6    1.78    3.28
   0  13  -5  209.60   12.40
   0  13  -4    3.03    3.29
   0  13  -3  941.10   25.87
   0  13  -2    7.08    3.51
   0 -13  -2    5.51    2.31
   0  13  -1 3062.97   53.41
   0 -13  -1 2969.38   50.56
   0 -13   0   10.02    3.37
   0  13   0    6.58    3.06
   0 -13   1 3034.22   53.75
   0  13   1 3048.52   51.04
   0 -13   2    4.09    2.92
   0  13   2    7.48    2.57
   0 -13   3  972.87   26.64
   0  13   3  995.57   21.02
   0  13   4    1.09    1.37
   0  13   5  189.77    6.06
   0  14 -13    0.98    5.14
   0  14 -12  182.47   14.89
   0  14 -11   11.13    6.25
   0  14 -10  160.64   13.53
   0  14  -9    9.88    5.12
   0  14  -8  167.34   12.67
   0  14  -7   -0.31    3.73
   0  14  -6  305.17   16.00
   0  14  -5    1.80    3.65
   0  14  -4   31.58    5.41
   0  14  -3    3.11    3.21
   0 -14  -2  737.12   19.09
   0  14  -2  785.20   23.01
   0 -14  -1    1.73    2.20
   0  14  -1    9.99    3.63
   0 -14   0  681.01   20.02
   0  14   0  721.39   20.47
   0 -14   1    8.06    3.32
   0  14   1    7.04    3.14
   0  14   2  787.19   19.94
   0 -14   2  811.65   23.66
   0  14   3    0.77    2.14
   0  14   4   29.77    3.23
   0  14   5    2.31    1.45
   0  15 -12   -4.30    5.45
   0  15 -11   77.54   10.07
   0  15 -10   12.27    6.14
   0  15  -9  486.59   22.92
   0  15  -8   -0.39    4.25
   0  15  -7  917.46   30.42
   0  15  -6    3.47    4.15
   0  15  -5  280.06   15.32
   0  15  -4   -2.18    3.08
   0  15  -3  236.16   13.01
   0  15  -2    1.02    3.55
   0 -15  -1  401.56   14.61
   0  15  -1  412.69   16.13
   0  15   0    4.98    3.00
   0 -15   0    6.18    3.01
   0  15   1  430.01   15.13
   0 -15   1  417.40   16.29
   0  15   2   -0.82    2.18
   0  15   3  247.69   10.08
   0  15   4   -0.99    1.80
   0  15   5  288.45    8.90
   0  15   6    2.15    0.80
   0  15   6    1.16    0.66
   0  16 -11    1.88    4.20
   0  16 -10  643.25   28.03
   0  16  -9    5.97    5.63
   0  16  -8 1123.18   36.08
   0  16  -7    3.72    5.28
   0  16  -6  690.47   25.88
   0  16  -5   -2.50    3.83
   0  16  -4  400.09   18.20
   0  16  -3   12.64    4.50
   0  16  -2  917.13   27.09
   0  16  -1    6.22    4.09
   0  16   0 1489.48   33.74
   0 -16   0 1379.26   32.88
   0 -16   1   13.89    4.14
   0  16   1   12.36    3.63
   0  16   2  914.25   23.48
   0  16   3    4.20    2.46
   0  16   4  426.06   13.12
   0  16   5    0.82    1.53
   0  16   6  674.21   12.15
   0  17 -10   -3.64    5.06
   0  17  -9   29.95    7.22
   0  17  -8    2.71    4.50
   0  17  -7   43.56    7.42
   0  17  -6   -3.74    4.74
   0  17  -5   71.52    8.51
   0  17  -4   -4.32    3.51
   0  17  -3  215.31   13.15
   0  17  -2    0.72    3.43
   0  17  -1  134.22    9.79
   0  17   0    3.34    3.24
   0  17   1  127.30    8.85
   0  17   2    1.55    2.42
   0  17   3  229.53   10.54
   0  17   4    2.85    2.11
   0  17   5   68.08    4.76
   0  18  -9    8.42    5.74
   0  18  -8 1004.31   35.45
   0  18  -7    7.26    5.32
   0  18  -6  691.14   27.52
   0  18  -5   16.84    5.25
   0  18  -4  439.42   20.20
   0  18  -3    4.60    4.13
   0  18  -2 1123.03   31.98
   0  18  -1    4.83    4.11
   0  18   0 1729.55   39.62
   0  18   1    6.30    3.62
   0  18   2 1268.58   30.28
   0  18   3    3.91    2.64
   0  18   4  445.10   14.38
   0  19  -8   11.63    5.69
   0  19  -7  377.14   21.06
   0  19  -6    2.13    4.07
   0  19  -5  477.87   22.37
   0  19  -4   -3.09    3.86
   0  19  -3  266.95   15.58
   0  19  -2    0.44    3.57
   0  19  -1  195.56   12.50
   0  19   0   16.63    4.42
   0  19   1  209.54   12.05
   0  19   2    0.94    2.96
   0  19   3  276.99   12.33
   0  20  -7   -3.62    4.43
   0  20  -6   66.14    9.22
   0  20  -5    4.85    4.83
   0  20  -4    9.61    4.67
   0  20  -3   -5.09    4.44
   0  20  -2   85.86    9.38
   0  20  -1    2.76    3.30
   0  20   0  428.81   18.81
   0  20   1   -0.90    2.97
   0  20   2   90.22    7.81
   0  21  -6    8.67    5.06
   0  21  -5  371.71   20.72
   0  21  -4   -4.22    4.56
   0  21  -3  260.23   16.55
   0  21  -2    1.63    3.92
   0  21  -1  419.98   19.72
   0  21   0    6.49    3.98
   0  21   1  416.13   18.00
   0  21   2    3.92    3.24
   0  22  -5   -0.99    4.44
   0  22  -4  201.99   15.19
   0  22  -3   13.38    5.23
   0  22  -2   15.16    5.01
   0  22  -1    0.55    4.11
   0  22   0   14.45    4.60
   0  22   1    6.42    3.60
   0  23  -4    3.41    4.43
   0  23  -3   41.72    7.66
   0  23  -2    1.21    4.66
   0  23  -1  368.32   19.42
   0  24  -3   13.37    6.22
   0  24  -2  339.77   19.73
  -1   0 -17    0.64    4.37
  -1   0 -16   -3.51    4.71
   1   0 -16    0.58    4.44
   1   0 -16    1.15    2.98
   1   0 -15    1.51    4.66
  -1   0 -15   -1.88    2.85
   1   0 -15    1.75    2.65
  -1   0 -15    3.24    4.38
  -1   0 -14    1.63    3.05
   1   0 -14    2.74    2.93
   1   0 -14   -0.91    4.77
  -1   0 -14    0.16    4.04
   1   0 -13    3.21    2.68
  -1   0 -13    2.95    2.56
   1   0 -13    3.99    4.26
   1   0 -13    0.30    2.54
  -1   0 -13   -3.11    3.61
   1   0 -12    2.23    2.53
   1   0 -12    3.60    4.02
  -1   0 -12    2.46    3.61
   1   0 -12    3.69    2.86
  -1   0 -12    3.41    2.55
  -1   0 -11    0.02    2.16
   1   0 -11   -0.66    3.64
  -1   0 -11   -0.97    3.07
   1   0 -11    1.36    2.21
   1   0 -11    4.36    2.76
  -1   0 -10    3.41    3.25
   1   0 -10    0.02    2.20
  -1   0 -10    1.06    2.37
   1   0 -10    9.73    4.07
  -1   0  -9    0.96    2.18
   1   0  -9    4.19    2.31
   1   0  -9    2.81    3.70
  -1   0  -9    4.96    3.10
  -1   0  -8    0.46    1.86
   1   0  -8    5.07    3.17
   1   0  -8    3.47    2.27
  -1   0  -8   -2.47    2.67
   1   0  -7    0.28    1.96
  -1   0  -7   -1.53    2.28
  -1   0  -7    1.07    2.49
   1   0  -6    3.83    2.18
  -1   0  -6    1.55    2.12
  -1   0  -6   -0.38    2.36
  -1   0  -5    0.69    2.05
  -1   0  -5    3.25    2.24
   1   0  -5   -0.27    1.87
   1   0  -5   -0.45    2.00
  -1   0  -4    1.99    1.82
   1   0  -4   -0.94    1.82
  -1   0  -4    0.08    1.84
  -1   0  -3    2.37    2.00
   1   0  -3    1.13    1.81
  -1   0  -3    2.65    1.70
  -1   0  -2    0.28    1.11
  -1   0  -2    7.25    1.89
  -1   0  -1    4.84    1.53
   1   0  -1   13.23    1.94
  -1   0   0    1.37    1.33
   1   0   0    3.10    1.51
   1   0   1    0.88    1.41
  -1   0   1    2.24    1.59
   1   0   2    1.47    1.65
  -1   0   2    7.19    2.04
   1   0   3    4.04    2.11
   1   0   4   -0.19    1.91
   1   0   5    1.54    1.86
   1   0   6   -0.86    1.84
   1   0   7   -2.41    2.08
   1   0   8    1.46    1.96
   1   0   9    1.83    1.96
   1   0  10    2.76    2.35
   1   0  11   -0.91    2.11
   1   0  12    1.37    2.32
   1   0  13   -4.10    3.11
  -1  -1 -17  227.54   17.15
  -1   1 -17  247.92   17.75
   1   1 -16  162.77   11.77
  -1   1 -16  205.41   12.78
   1   1 -16  193.00   15.67
  -1  -1 -16  173.76   14.69
  -1   1 -16  159.61   13.85
   1  -1 -16  189.96   15.89
   1   1 -15  441.84   23.05
   1  -1 -15  443.62   17.55
  -1   1 -15  430.71   21.57
   1   1 -15  478.79   19.40
  -1   1 -15  473.43   19.06
  -1  -1 -15  400.50   21.06
  -1  -1 -15  458.98   17.39
   1  -1 -15  448.65   23.31
  -1  -1 -14  215.45   14.53
   1   1 -14  211.85   15.25
  -1   1 -14  212.57   12.17
   1   1 -14  223.32   12.63
   1  -1 -14  202.68   14.94
  -1   1 -14  221.70   14.67
  -1  -1 -14  213.60   11.32
   1  -1 -14  231.67   11.99
  -1   1 -13  557.63   22.53
  -1   1 -13  596.84   20.24
   1   1 -13  573.41   24.11
  -1  -1 -13  553.70   22.65
   1  -1 -13  571.10   18.95
   1  -1 -13  541.86   23.51
   1   1 -13  569.95   19.88
   1  -1 -13  575.17   18.82
  -1  -1 -13  599.17   18.96
  -1  -1 -12  302.75   15.65
  -1   1 -12  297.97   15.44
   1  -1 -12  325.09   17.12
   1   1 -12  308.83   16.76
  -1   1 -12  322.60   14.12
   1  -1 -12  307.33   12.94
   1   1 -12  326.63   14.13
   1  -1 -12  316.88   13.22
  -1  -1 -12  324.51   13.08
   1   1 -11  623.16   19.47
  -1   1 -11  633.56   21.68
   1  -1 -11  652.29   18.53
   1  -1 -11  603.27   18.16
   1   1 -11  634.92   23.11
  -1   1 -11  614.18   19.19
  -1  -1 -11  620.46   17.98
  -1  -1 -11  640.90   22.14
   1  -1 -11  624.46   23.08
  -1  -1 -10 1265.74   26.97
  -1  -1 -10 1291.54   31.79
  -1   1 -10 1300.90   28.96
   1   1 -10 1253.51   28.88
   1  -1 -10 1274.18   27.49
  -1   1 -10 1309.85   31.65
   1  -1 -10 1284.29   33.24
   1   1 -10 1268.84   32.93
   1  -1 -10 1259.37   27.46
  -1   1  -9  446.53   14.80
   1   1  -9  484.93   15.47
   1  -1  -9  461.29   13.98
  -1  -1  -9  472.17   16.79
  -1   1  -9  470.97   16.59
   1  -1  -9  487.00   18.25
   1  -1  -9  467.51   14.22
  -1  -1  -9  464.97   13.77
  -1  -1  -8 1231.15   24.63
  -1   1  -8 1271.83   26.58
   1  -1  -8 1296.38   30.46
   1  -1  -8 1219.52   25.18
   1  -1  -8 1251.20   25.18
  -1   1  -8 1290.78   28.41
  -1  -1  -8 1247.19   28.43
   1   1  -8 1276.75   26.88
  -1  -1  -7  959.39   19.72
  -1  -1  -7  942.58   22.52
   1  -1  -7  964.36   24.18
   1  -1  -7  934.76   20.13
   1  -1  -7  969.51   20.25
  -1   1  -7  954.79   22.20
   1   1  -7  966.26   21.67
  -1   1  -7  940.07   21.21
  -1  -1  -6  204.40    7.37
   1  -1  -6  198.32    7.54
   1  -1  -6  193.45    9.36
   1   1  -6  193.60    8.18
   1  -1  -6  202.06    7.72
  -1  -1  -6  194.77    8.63
  -1   1  -6  197.88    8.16
   1   1  -5 3483.07   52.53
  -1  -1  -5 3472.41   52.64
   1  -1  -5 3428.38   50.73
   1  -1  -5 3441.60   54.63
  -1  -1  -5 3455.00   50.08
  -1   1  -5 3484.76   52.23
  -1  -1  -4  175.57    6.61
  -1   1  -4  169.68    6.63
   1  -1  -4  170.19    6.15
  -1  -1  -4  153.25    5.54
   1  -1  -4  155.90    7.11
   1  -1  -3 3482.80   48.86
  -1  -1  -3 3431.72   48.25
  -1   1  -3 3465.63   50.04
   1   1  -3 3469.20   50.24
   1  -1  -3 3451.65   50.80
  -1  -1  -3 3472.08   48.89
   1  -1  -2 2774.12   40.18
   1  -1  -2 2886.66   40.98
  -1  -1  -2 2830.52   39.77
   1   1  -2 2806.71   41.19
  -1   1  -2 2862.88   41.11
  -1  -1  -1 6023.91   80.34
   1  -1  -1 6136.34   79.73
   1  -1  -1 6108.03   80.70
  -1   1  -1 6194.68   81.25
   1   1  -1 6046.01   81.24
   1   1   0 3616.95   49.98
   1  -1   0 3584.13   49.97
  -1  -1   0 3722.18   49.88
  -1   1   0 3630.41   49.99
  -1  -1   1 6103.49   81.02
   1   1   1 6058.80   80.16
   1  -1   1 6040.50   80.95
  -1   1   1 6152.68   80.58
   1   1   2 2815.48   39.84
   1   1   2 2853.47   39.45
  -1   1   2 2876.05   40.44
   1  -1   2 2845.57   41.21
   1   1   3 3369.49   47.22
   1  -1   3 3311.68   48.76
  -1   1   3 3434.31   47.80
   1   1   3 3406.23   47.84
   1   1   4  140.18    5.95
   1   1   4  138.99    5.21
   1  -1   4  140.19    6.03
   1  -1   5 3471.90   52.02
   1   1   5 3437.20   49.87
   1  -1   6  173.17    7.46
   1   1   6  163.49    6.57
   1   1   7  984.89   20.01
   1  -1   7  963.74   21.50
   1   1   8 1253.30   24.68
   1  -1   8 1260.43   26.47
   1   1   9  453.26   13.47
   1  -1   9  453.00   14.77
   1  -1  10 1292.85   28.85
   1   1  10 1276.54   26.98
   1  -1  11  614.05   19.04
   1   1  11  595.49   17.48
   1   1  12  318.79   12.85
   1  -1  12  319.45   13.89
   1  -1  13  554.67   19.48
  -1   2 -17   97.78   12.06
  -1   2 -16  218.48   13.66
  -1  -2 -16  215.58   16.04
   1   2 -16  221.35   16.88
   1  -2 -16  228.14   17.41
   1   2 -16  212.55   13.76
  -1   2 -16  198.98   15.37
  -1   2 -15   73.69    7.89
  -1  -2 -15   70.04    9.32
  -1   2 -15   61.48    8.97
   1   2 -15   72.69   10.12
   1   2 -15   72.81    8.08
   1  -2 -15   67.90    6.60
   1  -2 -15   71.30    9.78
   1   2 -14  405.74   17.83
  -1  -2 -14  374.91   19.49
  -1  -2 -14  431.29   15.55
  -1   2 -14  383.45   19.37
   1  -2 -14  388.52   20.80
   1  -2 -14  415.80   15.69
  -1   2 -14  437.75   18.25
   1   2 -14  373.09   20.35
  -1   2 -13  290.49   16.00
   1  -2 -13  304.14   12.84
  -1   2 -13  289.16   14.27
   1  -2 -13  279.68   12.42
   1  -2 -13  280.51   16.77
  -1  -2 -13  321.92   12.82
  -1  -2 -13  269.04   15.76
   1   2 -13  323.44   17.80
   1   2 -13  293.14   14.47
  -1  -2 -12  745.28   25.53
   1   2 -12  774.73   27.00
  -1   2 -12  783.89   23.47
  -1   2 -12  740.60   25.09
  -1  -2 -12  799.01   20.61
   1  -2 -12  754.85   26.94
   1  -2 -12  731.67   20.51
   1   2 -12  748.17   23.18
   1  -2 -12  781.89   20.91
   1   2 -11  307.15   13.63
  -1  -2 -11  300.40   11.47
  -1   2 -11  326.65   15.16
  -1  -2 -11  307.78   15.11
   1  -2 -11  312.41   11.88
  -1   2 -11  306.02   13.52
   1  -2 -11  341.02   16.74
   1  -2 -11  319.43   12.16
   1   2 -10  408.49   15.27
  -1   2 -10  376.16   15.58
   1  -2 -10  397.05   12.97
   1  -2 -10  397.10   17.30
  -1   2 -10  400.06   14.95
  -1  -2 -10  390.90   16.29
  -1  -2 -10  393.28   12.67
   1  -2 -10  392.34   13.01
  -1   2  -9  855.73   23.25
  -1  -2  -9  880.47   19.48
   1  -2  -9  857.04   19.64
   1  -2  -9  828.59   19.62
  -1  -2  -9  844.30   23.78
   1   2  -9  865.55   22.44
  -1   2  -9  828.03   21.89
   1  -2  -9  861.13   25.17
   1  -2  -8  214.41    8.30
  -1  -2  -8  204.41    7.93
   1  -2  -8  220.37    8.53
  -1  -2  -8  212.80   10.56
   1   2  -8  228.28   10.16
  -1   2  -8  221.31    9.94
   1  -2  -8  202.89   11.00
   1  -2  -7  800.59   17.05
  -1  -2  -7  793.02   20.35
   1  -2  -7  744.14   16.81
  -1  -2  -7  762.34   16.33
   1   2  -7  775.84   19.53
  -1   2  -7  773.23   19.24
   1  -2  -7  756.33   21.14
  -1  -2  -6 1747.85   28.46
   1   2  -6 1754.45   32.39
   1  -2  -6 1749.99   29.00
   1  -2  -6 1773.77   34.43
  -1  -2  -6 1769.05   32.83
  -1   2  -6 1763.22   32.14
   1  -2  -6 1688.87   29.01
  -1   2  -5   33.62    3.79
  -1  -2  -5   30.97    3.49
   1  -2  -5   29.50    2.82
  -1  -2  -5   30.87    2.67
   1  -2  -5   30.40    4.10
   1   2  -5   32.41    3.87
  -1  -2  -4 2785.62   39.95
  -1   2  -4 2879.24   43.95
   1   2  -4 2830.01   43.91
   1  -2  -4 2765.13   40.87
   1  -2  -4 2829.95   44.89
  -1   2  -3  544.45   12.86
   1  -2  -3  550.62   11.27
  -1  -2  -3  549.59   10.60
   1  -2  -3  556.43   13.29
   1  -2  -2  392.82    8.79
   1  -2  -2  388.08    9.59
   1   2  -2  392.44    9.95
  -1   2  -2  390.26    9.97
  -1  -2  -2  402.22    8.36
  -1   2  -1 1613.62   25.39
   1  -2  -1 1588.14   24.45
  -1  -2  -1 1596.91   23.94
   1   2  -1 1568.56   25.41
  -1  -2   0 1789.19   26.87
  -1   2   0 1792.75   27.15
   1  -2   0 1783.87   27.12
   1   2   0 1754.56   26.85
  -1   2   1 1592.06   24.47
   1   2   1 1566.45   23.92
  -1   2   1 1606.91   24.08
  -1  -2   1 1579.61   25.18
   1  -2   1 1593.82   25.26
   1   2   2  346.54    7.65
  -1   2   2  348.61    8.10
   1  -2   2  347.99    9.28
  -1   2   2  361.11    9.01
   1  -2   3  533.26   12.59
   1   2   3  510.43   10.12
  -1   2   3  535.64   12.86
   1   2   3  532.39   11.88
  -1   2   3  533.50   10.89
   1  -2   4 2782.37   43.17
   1   2   4 2712.06   39.39
   1   2   4 2853.12   42.79
   1   2   5   33.43    3.66
   1   2   5   28.25    2.48
   1  -2   5   34.82    3.66
   1  -2   6 1727.75   31.83
   1   2   6 1744.64   28.15
   1   2   7  778.10   16.39
   1  -2   7  774.40   19.31
   1  -2   8  188.28    9.14
   1   2   8  186.67    7.37
   1   2   9  839.40   18.92
   1  -2   9  859.46   22.21
   1   2  10  358.14   11.83
   1  -2  10  364.06   14.24
   1  -2  11  326.58   13.91
   1   2  11  311.33   11.50
   1  -2  12  739.60   22.71
   1   2  12  737.10   19.67
  -1   3 -17   14.32    5.26
  -1   3 -17   20.45    6.82
   1   3 -17   11.72    5.11
  -1   3 -16  233.42   16.52
   1   3 -16  263.53   18.37
   1   3 -16  265.94   15.81
   1  -3 -16  249.64   18.69
  -1   3 -16  244.56   14.93
   1  -3 -15   51.64    9.07
   1   3 -15   61.50    9.29
   1   3 -15   59.72    7.92
  -1   3 -15   59.23    8.76
  -1   3 -15   53.55    7.13
   1  -3 -14  195.67   10.06
   1   3 -14  192.82   14.53
  -1   3 -14  218.36   14.48
  -1  -3 -14  199.60   14.41
   1  -3 -14  199.65   14.93
  -1   3 -14  189.62   12.30
  -1  -3 -14  203.20    9.95
   1   3 -14  198.75   12.78
   1  -3 -13  198.47    9.65
   1  -3 -13  174.39   13.41
   1   3 -13  160.63   11.02
   1  -3 -13  182.81    9.54
  -1  -3 -13  163.93   12.50
  -1  -3 -13  189.52    9.17
   1   3 -13  200.16   14.14
  -1   3 -13  191.05   13.08
  -1   3 -13  169.31   11.30
  -1  -3 -12  176.69    8.62
  -1   3 -12  179.61   11.20
  -1  -3 -12  190.61   12.65
   1   3 -12  176.07   11.23
   1  -3 -12  200.27    9.35
   1  -3 -12  188.11   13.30
   1  -3 -12  177.09    9.07
  -1   3 -12  175.12   11.83
  -1   3 -11   87.28    8.16
   1   3 -11   72.22    7.17
   1  -3 -11   79.19    5.65
  -1  -3 -11   81.65    8.06
  -1  -3 -11   73.04    5.32
   1  -3 -11   81.36    8.48
   1  -3 -11   73.06    5.44
  -1   3 -11   71.66    6.89
  -1  -3 -10   46.63    4.06
   1  -3 -10   40.40    6.27
  -1   3 -10   46.38    5.53
   1  -3 -10   38.00    3.77
  -1  -3 -10   46.17    6.06
   1  -3 -10   42.60    4.04
   1   3 -10   50.78    5.78
  -1   3  -9  219.27   10.81
   1   3  -9  232.13   11.22
  -1  -3  -9  221.31    8.13
   1  -3  -9  227.40   12.37
   1  -3  -9  200.84    8.27
   1  -3  -9  215.75    8.37
  -1  -3  -9  218.89   11.50
  -1   3  -8  358.87   13.40
   1  -3  -8  363.09   10.63
  -1  -3  -8  350.80   13.91
   1  -3  -8  363.45   14.91
   1  -3  -8  349.09   10.61
   1   3  -8  355.95   13.44
  -1  -3  -8  371.40   10.22
  -1   3  -7  716.73   19.10
   1  -3  -7  701.66   15.42
   1   3  -7  735.54   19.44
  -1  -3  -7  707.12   19.55
  -1  -3  -7  709.81   14.71
   1  -3  -7  719.79   20.75
   1  -3  -7  725.25   15.45
   1  -3  -6 1153.38   20.92
  -1  -3  -6 1186.70   20.08
   1  -3  -6 1166.47   26.55
  -1   3  -6 1167.54   24.87
   1   3  -6 1155.65   25.12
  -1   3  -5  451.82   13.27
  -1  -3  -5  419.81    9.21
   1  -3  -5  421.35   10.03
   1  -3  -5  430.16   13.68
   1   3  -5  416.00   12.86
   1  -3  -4  263.45    7.12
   1   3  -4  262.10    9.43
   1  -3  -4  265.07    9.79
  -1   3  -4  265.80    9.36
  -1  -3  -4  259.97    6.40
  -1  -3  -3 1788.44   26.14
   1  -3  -3 1813.73   30.72
   1  -3  -3 1760.15   27.10
   1   3  -3 1791.94   30.54
  -1   3  -3 1827.62   30.64
  -1  -3  -2   96.47    3.59
   1  -3  -2   82.59    3.79
  -1   3  -2   90.76    4.88
  -1  -3  -1 3248.82   44.64
  -1   3  -1 3248.72   46.75
   1  -3  -1 3135.99   45.09
   1   3  -1 3229.56   46.50
   1   3   0    7.06    1.96
   1  -3   0    3.09    1.80
  -1   3   0    5.34    1.93
  -1  -3   0    3.75    1.83
   1  -3   1 3127.52   45.67
  -1   3   1 3170.04   44.35
   1   3   1 3116.73   43.68
   1   3   2  109.02    3.90
  -1   3   2   99.72    5.00
  -1   3   2  101.58    4.18
   1  -3   2   99.07    5.11
  -1   3   3 1716.57   29.39
   1   3   3 1684.61   25.00
   1  -3   3 1727.73   29.45
  -1   3   3 1714.70   26.03
  -1   3   4  270.14    7.15
   1   3   4  262.86    9.01
   1  -3   4  261.70    9.33
  -1   3   4  260.67    9.63
   1   3   4  255.75    6.33
   1  -3   5  450.08   13.14
   1   3   5  442.27    9.44
  -1   3   5  451.66   13.88
   1   3   5  439.06   12.97
   1   3   6 1163.32   25.06
   1   3   6 1152.74   19.70
   1  -3   6 1178.50   24.87
   1   3   7  714.19   19.45
   1   3   7  718.11   14.69
   1  -3   7  738.02   19.40
   1   3   8  347.97    9.79
   1  -3   8  343.43   13.00
   1  -3   9  216.43   10.63
   1   3   9  209.33    7.82
   1   3  10   43.00    3.90
   1  -3  10   47.85    5.37
   1  -3  11   81.16    7.18
   1   3  11   80.07    5.40
   1   4 -17  313.43   18.34
  -1   4 -17  324.86   18.33
  -1   4 -17  309.98   19.82
  -1   4 -16  210.92   15.93
   1   4 -16  212.25   16.66
   1  -4 -16  225.06   17.35
   1   4 -16  240.00   15.28
  -1   4 -16  230.18   14.87
   1  -4 -15  341.70   20.49
  -1   4 -15  314.44   18.45
  -1   4 -15  339.23   17.59
   1   4 -15  350.26   20.64
   1   4 -15  328.08   17.44
   1   4 -14  476.69   20.42
   1  -4 -14  469.17   23.22
  -1   4 -14  451.55   19.77
  -1   4 -14  473.96   21.62
   1   4 -14  442.42   22.19
   1  -4 -14  503.44   15.60
  -1  -4 -13  191.65    8.60
   1  -4 -13  190.44    8.95
   1  -4 -13  173.10   13.94
  -1   4 -13  178.18   11.89
  -1   4 -13  191.56   13.05
   1   4 -13  182.81   12.08
   1  -4 -12 1022.32   32.50
  -1  -4 -12 1061.93   22.36
   1  -4 -12 1040.88   23.01
   1  -4 -12 1056.41   23.40
   1   4 -12 1002.88   29.01
  -1   4 -12  990.89   28.76
  -1   4 -11  319.59   14.89
   1  -4 -11  340.83   11.24
  -1  -4 -11  349.07   10.86
   1  -4 -11  334.46   11.37
   1   4 -11  345.21   15.41
   1  -4 -11  321.08   16.58
   1   4 -10 1258.99   31.06
  -1  -4 -10 1269.49   23.73
   1  -4 -10 1235.44   24.73
   1  -4 -10 1283.41   33.96
  -1   4 -10 1279.34   31.00
   1  -4 -10 1267.46   24.60
  -1  -4  -9  837.50   17.01
   1  -4  -9  825.58   25.17
  -1   4  -9  844.25   23.30
   1   4  -9  815.32   23.21
   1  -4  -9  817.82   17.97
   1  -4  -9  844.45   17.79
   1   4  -8 1673.33   34.64
   1  -4  -8 1611.20   27.62
   1  -4  -8 1624.23   36.36
  -1  -4  -8 1620.10   26.68
   1  -4  -8 1609.60   27.87
  -1   4  -8 1666.51   34.44
   1  -4  -7 1089.36   20.29
   1   4  -7 1127.62   26.05
  -1   4  -7 1109.01   25.84
   1  -4  -7 1131.46   20.21
   1  -4  -7 1137.69   27.67
  -1  -4  -7 1118.11   19.07
  -1  -4  -6 1112.42   18.30
  -1   4  -6 1128.68   25.09
   1  -4  -6 1112.02   19.68
   1   4  -6 1134.25   25.26
   1  -4  -6 1107.18   26.12
   1  -4  -5 1013.99   18.05
   1   4  -5 1013.81   23.00
   1  -4  -5 1051.45   23.99
  -1  -4  -5 1066.21   16.77
  -1   4  -5 1064.53   23.18
  -1   4  -4 2635.65   42.98
  -1  -4  -4 2615.56   35.90
   1  -4  -4 2537.83   37.34
   1   4  -4 2623.81   43.07
  -1  -4  -3 1641.94   23.78
   1   4  -3 1650.18   29.32
   1  -4  -3 1580.42   24.90
  -1   4  -3 1625.66   29.16
  -1  -4  -2 1757.12   25.91
   1  -4  -2 1700.27   26.72
  -1   4  -2 1800.00   30.04
   1   4  -2 1760.96   29.77
   1  -4  -1 1254.34   21.23
  -1   4  -1 1323.22   23.10
   1  -4   0  508.48   11.63
  -1   4   0  512.27   11.69
   1   4   0  519.38   11.41
   1  -4   1 1382.35   24.07
  -1   4   1 1403.14   22.77
   1   4   1 1369.49   22.12
   1  -4   2 1642.70   28.61
   1   4   2 1650.29   24.87
  -1   4   2 1674.38   25.72
  -1   4   3 1674.87   25.45
  -1   4   3 1707.39   29.75
   1   4   3 1636.92   24.21
   1  -4   3 1614.66   29.59
   1  -4   4 2607.35   42.68
   1   4   4 2561.97   42.10
   1   4   4 2554.23   35.58
  -1   4   4 2595.67   37.14
  -1   4   4 2607.00   43.12
   1   4   5 1017.98   16.44
  -1   4   5 1078.34   23.85
   1   4   5 1043.49   22.78
   1  -4   5 1053.64   23.07
   1   4   6 1043.23   17.27
  -1   4   6 1096.11   25.43
   1   4   6 1055.65   24.14
   1  -4   6 1025.97   24.01
   1   4   7 1092.21   18.77
   1   4   7 1151.35   26.52
   1  -4   7 1132.43   26.03
   1   4   8 1619.77   34.80
   1   4   8 1611.88   26.31
   1  -4   8 1642.08   34.23
   1  -4   9  885.29   23.90
   1   4   9  830.05   16.87
   1   4  10 1237.17   23.11
   1  -4  10 1247.88   30.71
  -1   5 -17   25.28    6.90
  -1   5 -17   34.19    7.50
   1   5 -17   35.30    6.88
   1   5 -16   11.75    5.08
  -1   5 -16   10.80    5.63
  -1   5 -16    6.76    3.99
   1   5 -16    7.88    4.16
   1   5 -15   41.30    8.32
  -1   5 -15   31.51    7.07
   1   5 -15   32.89    6.64
  -1   5 -15   36.51    6.50
  -1   5 -14   33.66    6.20
   1  -5 -14   41.71    7.91
  -1   5 -14   34.63    7.01
   1   5 -14   40.43    6.93
  -1  -5 -13   80.47    4.98
   1  -5 -13   78.96    5.34
   1   5 -13   77.44    8.28
   1  -5 -13   68.88    9.04
  -1   5 -13   74.78    7.93
   1  -5 -12   15.90    2.78
   1  -5 -12   14.66    2.60
   1   5 -12   18.96    4.93
   1  -5 -12    9.91    4.50
  -1   5 -12    8.74    3.53
  -1  -5 -12   21.85    2.79
   1  -5 -11  107.47    5.80
  -1   5 -11  115.62    9.28
   1   5 -11  108.95    9.01
  -1  -5 -11  113.17    5.39
   1  -5 -11  103.55    5.60
   1  -5 -11  108.60    9.96
   1  -5 -10   88.98    5.06
  -1   5 -10   89.65    8.06
   1   5 -10   87.75    7.84
  -1  -5 -10   84.95    4.39
   1  -5 -10   88.43    4.92
   1  -5 -10   90.72    8.80
   1  -5  -9  136.51    5.83
   1  -5  -9  144.65   10.29
   1   5  -9  149.56    9.86
  -1   5  -9  133.05    9.04
  -1  -5  -9  151.65    5.43
   1  -5  -9  139.75    6.00
  -1   5  -8  133.49    8.79
   1  -5  -8  127.84    9.18
   1  -5  -8  135.39    5.49
   1   5  -8  147.04    9.16
   1  -5  -8  126.54    5.22
  -1  -5  -8  131.70    4.66
  -1   5  -7  453.29   15.57
   1  -5  -7  415.05   15.92
   1   5  -7  442.75   15.47
  -1  -5  -7  439.78    8.85
   1  -5  -7  433.49   10.03
   1  -5  -7  426.27   10.17
   1  -5  -6   33.00    2.48
  -1   5  -6   34.97    4.61
  -1  -5  -6   37.84    2.05
   1   5  -6   36.53    4.72
   1   5  -5  141.61    7.98
   1  -5  -5  137.62    4.86
  -1  -5  -5  137.35    3.76
  -1   5  -5  163.01    8.42
  -1  -5  -4  116.27    3.48
   1  -5  -4  110.46    4.21
   1   5  -4  112.42    6.84
  -1   5  -4  108.23    6.64
  -1   5  -3  282.60   10.12
   1  -5  -3  257.88    6.95
   1   5  -3  283.79   10.08
   1   5  -2 1039.02   20.80
  -1   5  -2 1013.79   20.78
   1  -5  -2  981.14   17.58
   1   5  -1   76.87    4.73
  -1   5  -1   72.91    4.86
   1  -5  -1   66.63    3.96
  -1   5   0  821.82   16.51
   1  -5   0  803.69   16.31
  -1   5   1   73.68    4.04
   1   5   1   73.25    3.86
   1  -5   1   70.55    4.65
  -1   5   2 1021.27   17.81
   1   5   2  995.06   16.95
   1  -5   2  985.82   20.48
   1   5   3  263.75    6.24
  -1   5   3  261.11    7.03
   1  -5   3  247.02    9.48
  -1   5   3  258.20    9.60
   1   5   4  104.60    3.36
  -1   5   4   96.74    6.33
  -1   5   4  111.21    4.22
   1  -5   4  103.50    6.49
   1   5   5  126.01    3.56
  -1   5   5  133.45    7.82
  -1   5   5  133.24    4.62
   1   5   5  136.91    7.57
   1  -5   5  131.65    7.50
   1   5   6   41.57    4.72
   1  -5   6   40.87    4.74
   1   5   6   37.14    1.94
  -1   5   6   43.12    5.00
   1  -5   7  416.95   15.03
   1   5   7  397.34    8.21
  -1   5   7  422.01   15.81
   1   5   7  427.67   15.29
   1  -5   8  138.59    8.82
   1   5   8  130.02    4.51
   1   5   8  130.62    8.81
   1   5   9  136.73    9.49
   1  -5   9  142.79    9.21
   1  -5  10   91.95    7.93
  -1   6 -17  314.48   20.15
  -1   6 -17  292.61   18.33
   1   6 -17  304.95   18.78
  -1   6 -16   80.68   10.18
   1   6 -16   59.48    8.89
   1   6 -16   95.19   12.00
  -1   6 -16   73.41   10.01
  -1   6 -15  354.78   18.92
   1   6 -15  357.31   19.12
  -1   6 -15  362.87   20.15
   1   6 -14  299.37   16.93
  -1   6 -14  306.95   16.95
  -1   6 -13  127.38   10.60
   1   6 -13  114.44   10.32
   1  -6 -12  473.15   12.34
   1  -6 -12  472.54   12.08
  -1  -6 -12  462.51   10.37
   1   6 -12  430.84   18.98
  -1   6 -12  480.91   19.96
  -1  -6 -12  476.76   10.56
  -1   6 -11  200.84   12.31
   1   6 -11  182.96   11.89
   1  -6 -11  192.93    7.12
   1  -6 -11  200.82    7.10
  -1  -6 -11  197.67    5.81
  -1  -6 -11  187.57    5.65
  -1  -6 -10  793.52   13.59
  -1   6 -10  747.28   24.00
   1  -6 -10  779.28   15.52
   1   6 -10  759.21   24.29
   1  -6 -10  743.57   15.64
  -1  -6  -9  409.13    7.88
   1   6  -9  396.18   16.47
   1  -6  -9  389.38    9.79
  -1   6  -9  400.43   16.28
   1  -6  -9  395.59    9.68
  -1   6  -8  548.00   18.59
   1  -6  -8  543.69   11.29
   1  -6  -8  533.50   11.41
   1   6  -8  550.25   18.74
   1  -6  -7 1500.52   23.14
   1   6  -7 1499.37   32.87
  -1   6  -7 1481.01   32.65
   1  -6  -7 1433.43   23.21
   1   6  -6 1529.64   32.44
  -1   6  -6 1556.40   32.46
   1  -6  -6 1486.48   23.33
   1   6  -5  412.57   14.16
  -1   6  -5  423.64   14.39
   1  -6  -5  394.97    8.78
   1   6  -4 1728.47   32.46
   1  -6  -4 1588.18   25.03
  -1   6  -4 1662.92   32.01
   1  -6  -3 1870.32   29.14
  -1   6  -3 1946.49   34.82
   1   6  -3 1943.10   34.79
   1   6  -2 2340.76   39.01
   1  -6  -2 2272.96   35.09
  -1   6  -2 2389.38   39.27
   1   6  -1 1453.39   26.13
  -1   6  -1 1430.61   26.31
   1  -6  -1 1379.95   24.19
   1   6   0  156.86    6.39
  -1   6   0  164.41    6.83
   1  -6   0  141.37    6.26
   1   6   1 1468.30   24.57
   1  -6   1 1479.06   26.88
   1   6   1 1455.74   24.61
  -1   6   1 1494.53   25.28
  -1   6   2 2294.73   34.68
   1  -6   2 2258.02   38.29
   1   6   2 2250.46   33.74
   1  -6   3 2003.55   35.96
   1   6   3 2020.72   29.53
  -1   6   3 2025.73   30.77
  -1   6   4 1649.39   31.93
   1   6   4 1572.42   22.93
   1  -6   4 1590.86   31.29
  -1   6   4 1595.67   24.73
  -1   6   5  445.90   14.97
   1  -6   5  422.28   14.45
  -1   6   5  419.81    9.06
  -1   6   6 1652.56   34.45
   1  -6   6 1574.08   33.50
   1   6   6 1524.33   33.14
  -1   6   7 1455.60   33.56
   1  -6   7 1461.51   32.60
   1   6   7 1479.11   32.77
   1  -6   8  591.74   19.39
   1   6   8  557.13   19.17
  -1   6   8  585.29   20.16
   1   6   9  410.81   16.80
   1  -6   9  392.62   16.13
  -1   7 -17   48.15    8.61
   1   7 -17   56.99    8.73
  -1   7 -16  340.60   19.78
   1   7 -16  346.39   19.81
  -1   7 -16  347.73   20.66
  -1   7 -15  105.21   10.88
  -1   7 -15   96.94   10.76
   1   7 -15  100.34   11.05
   1   7 -14  214.87   14.66
  -1   7 -14  200.08   14.11
  -1   7 -13  442.10   20.46
   1   7 -13  465.33   20.89
   1  -7 -12  129.82    4.81
  -1   7 -12  144.95   11.46
   1   7 -12  122.96   10.52
   1  -7 -11  650.19   12.53
  -1   7 -11  659.15   23.49
   1  -7 -11  639.04   12.65
   1   7 -11  647.55   23.37
   1  -7 -10  113.84    4.17
   1  -7 -10  107.62    4.17
   1   7 -10  104.03    9.07
  -1   7 -10  114.55    9.38
   1  -7  -9  458.57    9.22
   1   7  -9  436.07   17.64
   1  -7  -9  442.73    9.29
  -1   7  -9  453.94   17.96
   1  -7  -8  534.60   10.10
   1  -7  -8  529.20   10.21
  -1   7  -8  549.29   19.15
   1   7  -8  530.84   19.03
   1   7  -7  611.54   19.83
   1  -7  -7  598.80   11.13
  -1   7  -7  650.70   20.21
   1  -7  -7  614.69   11.08
   1   7  -6 1439.28   31.74
   1  -7  -6 1392.56   21.58
  -1   7  -6 1438.49   31.76
  -1   7  -5 2375.14   44.11
   1  -7  -5 2370.15   34.34
   1   7  -5 2436.09   44.26
  -1   7  -4 1275.19   27.68
   1   7  -4 1241.86   27.29
   1  -7  -4 1229.94   20.47
   1  -7  -3 2830.53   42.36
  -1   7  -3 3017.95   49.19
   1   7  -3 3009.12   49.03
   1   7  -2 1529.33   29.51
   1  -7  -2 1509.33   25.68
  -1   7  -2 1570.14   29.83
   1  -7  -1 1380.36   25.22
  -1   7  -1 1474.93   27.59
   1   7  -1 1494.13   27.35
  -1   7   0  444.25   12.23
   1  -7   0  457.60   12.29
   1   7   0  440.02   11.89
   1   7   1 1411.22   24.50
  -1   7   1 1427.60   25.22
   1  -7   1 1375.66   26.65
   1   7   2 1610.81   25.95
   1   7   2 1584.54   25.98
  -1   7   2 1608.29   26.85
   1  -7   2 1591.63   30.29
   1  -7   3 2983.20   49.36
   1   7   3 2919.77   41.83
  -1   7   3 2994.03   43.26
   1   7   3 2938.44   41.71
   1  -7   4 1253.82   27.58
  -1   7   4 1281.16   28.18
   1   7   4 1248.25   19.18
  -1   7   4 1274.51   20.98
   1   7   4 1267.09   19.04
  -1   7   5 2432.67   45.05
   1  -7   5 2409.43   44.73
  -1   7   5 2414.58   34.80
   1   7   6 1451.03   32.28
  -1   7   6 1466.95   32.86
   1  -7   6 1446.15   32.23
   1   7   7  678.68   21.03
   1  -7   7  657.41   20.67
  -1   7   7  672.34   21.26
   1   7   8  539.06   19.21
   1  -7   8  558.72   19.33
  -1   7   8  553.24   19.98
   1   8 -16    3.83    4.57
  -1   8 -16   19.96    6.94
  -1   8 -16    7.39    4.73
  -1   8 -15    4.24    4.05
   1   8 -15   -2.20    4.67
  -1   8 -14   69.68    9.44
   1   8 -14   78.36    9.66
  -1   8 -13   27.85    6.27
   1   8 -13   29.04    6.29
   1   8 -12   96.51    9.70
  -1   8 -12   99.90   10.02
   1   8 -11   82.39    8.57
  -1   8 -11   74.67    8.20
   1   8 -10  180.51   12.08
  -1   8 -10  179.75   11.96
  -1   8  -9  219.61   12.83
   1   8  -9  224.65   12.90
  -1   8  -8   44.34    6.03
   1   8  -8   46.05    6.05
  -1   8  -7   15.30    3.98
   1  -8  -7   12.02    1.18
   1   8  -7   12.42    3.70
   1  -8  -6   69.60    2.96
  -1   8  -6   84.25    7.30
   1   8  -6   81.48    7.16
  -1   8  -5    9.50    3.39
   1   8  -5   10.23    3.36
   1  -8  -5    2.98    1.18
   1   8  -4    8.35    3.44
   1  -8  -4    7.69    1.56
  -1   8  -4   10.02    3.53
  -1   8  -3   87.63    6.54
   1  -8  -3   81.31    4.32
   1   8  -3   90.19    6.53
   1  -8  -2  132.76    5.83
   1   8  -2  136.50    7.54
  -1   8  -2  135.88    7.71
   1  -8  -1  116.82    5.96
  -1   8  -1  111.90    6.60
   1   8  -1  129.97    6.81
   1   8   0    7.74    2.47
  -1   8   0    4.61    2.46
   1  -8   0    6.62    2.41
   1  -8   1  121.86    6.70
   1   8   1  121.69    5.91
  -1   8   1  117.35    5.98
   1   8   2  133.97    5.66
   1  -8   2  150.66    7.93
   1   8   2  141.28    5.81
  -1   8   2  138.42    6.11
   1  -8   3   76.49    5.97
   1   8   3   81.49    3.94
  -1   8   3   83.76    4.41
   1   8   3   78.43    3.80
  -1   8   4   14.59    1.97
   1  -8   4   11.89    3.25
   1   8   4   14.95    1.69
   1   8   4   15.33    1.58
   1  -8   5    4.84    2.36
  -1   8   5    5.91    1.24
  -1   8   5    2.56    2.35
  -1   8   6   65.32    2.87
  -1   8   6   87.31    7.31
   1   8   6   76.45    6.76
   1  -8   6   72.10    6.54
  -1   8   7   11.27    3.71
   1  -8   7   18.04    4.00
   1   8   7   12.10    3.45
   1   8   8   53.60    6.37
   1   9 -16  322.54   20.15
  -1   9 -16  361.28   21.34
   1   9 -15  239.87   16.85
  -1   9 -15  219.60   16.47
  -1   9 -14  228.18   16.02
   1   9 -14  235.15   16.38
  -1   9 -13  793.04   29.48
   1   9 -13  842.81   30.17
  -1   9 -12  154.66   12.41
   1   9 -12  154.29   12.29
  -1   9 -11  998.04   31.28
   1   9 -11 1018.71   31.64
   1   9 -10  393.89   18.27
  -1   9 -10  389.45   18.12
  -1   9  -9  489.10   19.74
   1   9  -9  502.71   20.05
  -1   9  -8  511.50   19.48
   1   9  -8  480.63   18.94
  -1   9  -7  732.82   23.15
   1   9  -7  777.47   23.82
   1  -9  -6  625.41   11.21
   1   9  -6  646.38   20.88
  -1   9  -6  632.46   20.51
  -1   9  -5 1022.13   26.17
   1   9  -5  990.38   25.87
   1  -9  -5  976.06   17.06
   1  -9  -4  512.50   11.61
  -1   9  -4  540.14   17.38
   1   9  -4  519.19   17.03
  -1   9  -3 1720.35   34.47
   1  -9  -3 1651.70   28.13
   1   9  -3 1692.73   34.02
  -1   9  -2  851.60   21.39
   1   9  -2  878.50   21.37
   1  -9  -2  853.81   18.12
  -1   9  -1 1812.77   33.83
   1   9  -1 1768.69   33.04
   1  -9  -1 1727.03   31.18
  -1   9   0 1921.29   34.36
   1   9   0 1927.51   33.95
   1  -9   0 1855.82   34.06
  -1   9   1 1820.45   31.97
   1  -9   1 1782.13   33.67
   1   9   1 1762.70   31.09
   1  -9   2  886.08   21.78
   1   9   2  864.90   17.81
   1   9   2  858.96   17.79
  -1   9   2  886.53   18.61
   1  -9   3 1660.90   34.27
   1   9   3 1660.91   27.37
   1   9   3 1690.35   27.29
  -1   9   3 1691.76   28.42
   1   9   4  530.62   10.80
  -1   9   4  523.17   11.94
   1   9   4  529.96   10.67
   1  -9   4  534.33   17.44
   1   9   5  946.53   14.16
   1  -9   5  987.81   25.65
  -1   9   5  998.10   26.30
  -1   9   5  961.38   16.85
   1   9   5  946.55   14.28
  -1   9   6  685.98   21.66
  -1   9   6  649.81   11.55
   1  -9   6  631.66   20.60
   1   9   7  771.85   24.00
  -1  10 -15  141.40   13.42
   1  10 -15  149.19   13.69
   1  10 -14  110.94   11.51
  -1  10 -14  109.04   11.58
   1  10 -13   49.44    8.08
  -1  10 -13   59.39    8.67
  -1  10 -12  298.72   17.67
   1  10 -12  321.12   17.96
  -1  10 -11   39.32    6.81
   1  10 -11   33.55    6.72
   1  10 -10  400.53   18.97
  -1  10 -10  424.83   19.53
   1  10  -9  259.55   14.65
  -1  10  -9  243.29   14.14
  -1  10  -8  203.09   12.57
   1  10  -8  196.96   12.31
  -1  10  -7  386.09   16.70
   1  10  -7  379.92   16.55
   1  10  -6  121.57    9.21
  -1  10  -6  129.78    9.46
   1 -10  -6  124.62    4.06
   1 -10  -5  343.28    8.64
   1  10  -5  345.11   14.87
  -1  10  -5  388.88   15.54
  -1  10  -4  192.96   10.60
   1  10  -4  199.73   10.69
   1 -10  -4  192.74    6.80
   1  10  -3  350.33   13.69
  -1  10  -3  343.78   13.64
   1 -10  -3  333.99   10.02
   1 -10  -2  401.52   11.86
  -1  10  -2  442.46   14.92
   1  10  -2  427.16   14.51
   1  10  -1  243.32   10.28
  -1  10  -1  243.41   10.51
   1 -10  -1  217.41    8.90
   1  10   0  190.03    8.58
   1 -10   0  179.71    8.47
  -1  10   0  187.02    8.68
  -1  10   1  263.72    9.97
   1  10   1  228.08    9.01
   1 -10   1  272.09   10.87
   1  10   2  409.52   11.57
  -1  10   2  426.58   12.27
   1 -10   2  430.35   14.73
   1  10   3  335.70    9.60
   1 -10   3  359.34   13.93
  -1  10   3  353.19   10.41
   1  10   3  332.79    9.46
   1 -10   4  210.17   11.07
   1  10   4  200.52    6.35
  -1  10   4  209.55    7.18
   1  10   4  204.53    6.29
  -1  10   5  318.41   14.58
  -1  10   5  351.23    8.90
   1  10   5  348.88    7.07
   1 -10   5  363.11   15.11
   1  10   5  360.69    7.27
  -1  10   6  118.82    9.22
   1 -10   6  132.34    9.42
  -1  10   6  121.06    4.01
  -1  11 -15  222.25   17.17
  -1  11 -14   35.24    7.40
   1  11 -14   33.71    7.20
  -1  11 -13  206.27   15.40
   1  11 -13  206.44   15.69
   1  11 -12   69.65    9.01
  -1  11 -12   75.19    9.52
  -1  11 -11  126.83   11.30
   1  11 -11  121.84   11.18
  -1  11 -10  583.37   23.89
   1  11 -10  615.74   24.27
  -1  11  -9   36.04    6.35
   1  11  -9   38.08    6.43
  -1  11  -8  403.80   18.28
   1  11  -8  427.79   18.66
  -1  11  -7  280.41   14.61
   1  11  -7  291.64   14.82
   1  11  -6   69.50    7.49
   1 -11  -6   59.80    2.87
  -1  11  -6   55.13    6.80
   1  11  -5 1415.15   33.87
   1 -11  -5 1363.10   23.34
  -1  11  -5 1441.40   33.98
   1 -11  -4    4.22    1.60
  -1  11  -4    3.68    3.61
   1  11  -4    4.27    3.98
  -1  11  -3 1422.64   32.10
   1 -11  -3 1392.43   26.18
   1  11  -3 1445.35   32.25
  -1  11  -2  473.69   16.21
   1  11  -2  475.02   16.09
   1 -11  -2  482.15   13.63
  -1  11  -1  138.19    8.19
   1 -11  -1  127.99    7.03
   1  11  -1  129.03    7.90
   1  11   0 1550.07   30.67
  -1  11   0 1525.89   30.92
   1 -11   0 1517.21   30.90
   1 -11   1  118.26    7.59
   1  11   1  127.00    6.97
  -1  11   1  127.89    7.28
   1  11   2  487.26   13.44
   1 -11   2  524.79   17.01
  -1  11   2  508.82   14.23
   1  11   3 1414.49   25.75
  -1  11   3 1481.57   27.11
   1 -11   3 1467.13   32.80
   1  11   3 1437.39   25.99
  -1  11   4    1.81    1.52
   1 -11   4    5.09    2.96
   1  11   4    3.77    1.49
   1  11   4    3.82    1.55
   1 -11   5 1417.58   34.09
   1  11   5 1438.20   21.99
   1  11   5 1416.13   21.75
  -1  11   5 1418.89   24.17
  -1  11   6   55.44    2.81
  -1  12 -14  420.72   23.06
   1  12 -14  417.21   22.89
   1  12 -13  165.16   14.40
  -1  12 -13  158.93   13.77
  -1  12 -12  476.96   23.31
   1  12 -12  445.95   22.57
   1  12 -11  486.13   22.87
  -1  12 -11  491.48   22.82
   1  12 -10  488.83   22.11
  -1  12 -10  487.24   22.06
   1  12  -9  916.44   30.35
  -1  12  -9  878.13   29.46
  -1  12  -8  199.77   13.28
   1  12  -8  229.80   14.07
   1  12  -7  594.91   22.37
  -1  12  -7  591.81   22.23
   1  12  -6 1249.81   32.66
   1 -12  -6 1160.07   19.32
  -1  12  -6 1221.24   32.29
  -1  12  -5   97.58    8.37
   1 -12  -5   78.11    4.20
   1  12  -5   82.81    7.86
   1 -12  -4 1060.77   21.31
  -1  12  -4 1133.50   29.29
   1  12  -4 1113.39   28.95
   1  12  -3  200.81   10.99
   1 -12  -3  188.24    8.03
  -1  12  -3  204.30   11.13
   1 -12  -2 1047.43   23.17
   1  12  -2 1081.98   26.86
  -1  12  -2 1105.30   27.22
   1 -12  -1 1232.65   26.87
   1  12  -1 1293.48   28.88
  -1  12  -1 1301.43   29.36
  -1  12   0  651.43   18.66
   1  12   0  658.45   18.41
   1 -12   0  687.38   19.04
   1  12   1 1270.98   26.75
  -1  12   1 1298.45   27.61
   1 -12   1 1292.04   29.22
   1 -12   2 1051.77   26.84
  -1  12   2 1109.73   23.94
   1  12   2 1102.20   23.07
   1  12   3  188.22    7.68
   1 -12   3  185.49   10.63
  -1  12   3  200.53    8.39
   1  12   3  182.87    7.58
   1 -12   4 1167.68   29.75
  -1  12   4 1154.52   22.40
   1  12   4 1149.90   21.30
   1  12   4 1102.25   20.95
   1  12   5   80.09    3.62
   1  12   5   82.16    3.74
  -1  12   5   78.90    4.39
  -1  12   6 1292.87   20.99
  -1  13 -13   10.65    5.36
   1  13 -13   10.07    4.99
   1  13 -12   41.95    7.78
  -1  13 -12   44.74    7.76
   1  13 -11   -2.27    5.27
  -1  13 -11   13.51    5.51
   1  13 -10   52.89    8.01
  -1  13 -10   52.74    8.32
  -1  13  -9   85.15    9.53
   1  13  -9   78.55    8.98
   1  13  -8   23.99    5.83
  -1  13  -8   13.38    4.58
  -1  13  -7   48.96    6.85
   1  13  -7   50.84    7.18
   1 -13  -6    4.13    1.27
  -1  13  -6    7.00    3.79
   1  13  -6    3.28    3.55
   1  13  -5  106.74    9.09
   1 -13  -5  104.69    5.16
  -1  13  -5  106.77    9.42
   1 -13  -4   13.21    2.35
  -1  13  -4   12.12    3.86
   1  13  -4   19.80    4.70
  -1  13  -3   32.20    5.25
   1 -13  -3   24.48    3.23
   1  13  -3   25.11    4.77
   1  13  -2  137.37    9.02
  -1  13  -2  136.96    9.11
   1 -13  -2  128.01    7.25
   1 -13  -1   67.10    5.61
  -1  13  -1   59.54    6.17
   1  13  -1   68.48    6.18
  -1  13   0   56.35    5.66
   1  13   0   53.17    5.39
   1 -13   0   54.75    5.37
   1  13   1   66.32    5.59
  -1  13   1   75.98    6.20
   1 -13   1   68.99    6.28
  -1  13   2  130.80    7.44
   1 -13   2  129.43    8.93
   1  13   2  127.16    7.01
   1  13   3   26.05    3.24
   1 -13   3   24.97    4.31
   1  13   3   33.11    3.71
  -1  13   3   24.73    3.44
  -1  13   4   15.65    2.67
   1  13   4   13.96    2.37
   1  13   4   14.46    2.42
   1  13   5  108.34    4.59
   1  13   5  118.20    4.80
  -1  13   5  117.71    5.65
  -1  13   6    5.06    1.41
   1  14 -12  335.88   20.12
  -1  14 -12  322.11   19.97
   1  14 -11  222.21   16.12
  -1  14 -11  223.46   16.10
  -1  14 -10  271.72   17.40
   1  14 -10  264.79   17.16
   1  14  -9  629.91   25.71
  -1  14  -9  635.18   25.85
   1  14  -8  575.47   24.00
  -1  14  -8  580.93   23.89
   1  14  -7  402.63   19.28
  -1  14  -7  441.74   19.93
   1  14  -6  529.01   21.24
  -1  14  -6  534.37   21.39
   1 -14  -6  481.08   11.05
  -1  14  -5  227.42   13.36
   1  14  -5  206.70   12.83
   1 -14  -5  201.33    7.69
  -1  14  -4  688.73   23.30
   1  14  -4  705.34   23.39
   1 -14  -4  677.94   16.85
  -1  14  -3   45.56    6.33
   1 -14  -3   53.29    4.73
   1  14  -3   56.88    6.66
   1 -14  -2  497.84   15.77
  -1  14  -2  536.67   19.06
   1  14  -2  528.97   18.59
  -1  14  -1  579.19   19.27
   1  14  -1  560.72   18.59
   1 -14  -1  536.98   17.09
   1  14   0  121.53    8.12
  -1  14   0  112.61    8.03
   1 -14   0  111.29    7.84
  -1  14   1  588.03   18.00
   1 -14   1  547.77   18.73
   1  14   1  565.79   17.18
   1 -14   2  504.87   18.46
  -1  14   2  514.20   16.02
   1  14   2  493.75   15.22
   1  14   3   53.40    4.69
   1  14   3   49.66    4.54
  -1  14   3   56.47    5.03
   1  14   4  715.73   16.80
   1  14   4  748.13   17.11
  -1  14   4  763.36   18.18
   1  14   5  213.12    7.07
   1  14   5  215.81    7.13
  -1  14   5  206.90    7.91
  -1  14   6  462.75   10.84
   1  15 -12  188.98   15.67
  -1  15 -12  187.24   15.67
  -1  15 -11  111.07   11.85
   1  15 -11   76.53   10.55
   1  15 -10  412.40   21.87
  -1  15 -10  400.15   21.61
  -1  15  -9  167.73   13.70
   1  15  -9  161.70   13.39
   1  15  -8  249.13   16.03
  -1  15  -8  253.23   16.15
  -1  15  -7  425.62   20.49
   1  15  -7  416.40   19.99
  -1  15  -6   69.46    8.27
   1  15  -6   64.76    8.90
  -1  15  -5  517.32   20.98
   1 -15  -5  481.07   13.11
   1  15  -5  482.41   20.53
   1 -15  -4  125.03    6.87
  -1  15  -4  135.35   10.48
   1  15  -4  119.67    9.77
   1 -15  -3  791.08   20.42
  -1  15  -3  841.99   26.02
   1  15  -3  844.43   25.74
   1 -15  -2  358.51   13.64
  -1  15  -2  401.61   16.88
   1  15  -2  392.56   16.42
   1 -15  -1  137.09    8.63
   1  15  -1  130.92    9.01
  -1  15  -1  133.56    9.35
   1  15   0  971.57   25.51
  -1  15   0  975.75   26.05
   1 -15   0  944.97   25.50
   1 -15   1  145.27    9.65
  -1  15   1  136.42    8.84
   1  15   1  121.46    8.02
  -1  15   2  388.22   14.23
   1  15   2  392.72   13.82
   1  15   3  849.81   20.48
   1  15   3  806.15   20.25
  -1  15   3  850.21   21.33
   1  15   4  111.06    6.18
   1  15   4  112.35    6.30
  -1  15   4  123.26    7.02
   1  15   5  512.58   12.41
   1  15   5  528.17   12.62
  -1  15   5  482.62   13.51
   1  15   6   54.66    2.30
   1  15   6   57.73    2.41
  -1  15   6   58.17    3.71
  -1  16 -11   54.69    8.95
   1  16 -11   55.99    8.98
   1  16 -10   60.24    9.05
  -1  16 -10   71.07    9.85
   1  16  -9   34.37    7.51
  -1  16  -9   28.13    6.08
   1  16  -8  104.47   11.07
  -1  16  -8   96.66   10.60
   1  16  -7  266.12   16.44
  -1  16  -7  242.51   15.88
   1  16  -6  289.48   16.52
  -1  16  -6  327.92   17.54
   1  16  -5   42.28    7.05
   1 -16  -5   39.88    3.72
  -1  16  -5   36.22    6.28
  -1  16  -4  353.28   17.29
   1  16  -4  360.35   17.20
   1 -16  -4  338.02   12.09
   1  16  -3  258.32   14.19
  -1  16  -3  260.86   14.35
   1 -16  -3  252.07   10.95
   1  16  -2  134.05    9.82
  -1  16  -2  131.98   10.03
   1 -16  -2  133.31    8.44
   1  16  -1   97.23    8.24
  -1  16  -1  113.37    8.99
   1 -16  -1  114.57    8.11
  -1  16   0   14.10    4.05
   1 -16   0   18.06    3.95
   1  16   0   12.05    3.57
  -1  16   1  124.84    8.77
   1  16   1  137.96    8.91
  -1  16   2  132.40    8.60
   1  16   2  130.58    8.15
   1  16   3  283.78   11.34
  -1  16   3  281.68   11.88
   1  16   3  259.83   10.91
   1  16   4  356.70   11.86
   1  16   4  353.33   11.78
  -1  16   4  352.65   12.53
  -1  16   5   41.59    4.04
   1  16   5   48.55    3.76
   1  16   5   47.58    3.79
  -1  16   6  337.52    9.67
   1  17 -10  154.50   14.43
  -1  17 -10  151.75   14.25
  -1  17  -9  292.70   18.80
   1  17  -9  285.35   18.70
  -1  17  -8  522.95   24.53
   1  17  -8  448.09   22.62
   1  17  -7  404.08   21.05
  -1  17  -7  419.74   21.11
   1  17  -6  501.92   22.88
  -1  17  -6  525.20   23.05
  -1  17  -5  795.35   28.21
   1  17  -5  822.06   28.52
   1  17  -4  195.70   13.23
  -1  17  -4  214.96   14.06
   1  17  -3  682.33   24.28
  -1  17  -3  669.38   24.35
   1 -17  -3  657.23   19.36
   1 -17  -2  372.22   14.80
   1  17  -2  393.21   17.65
  -1  17  -2  364.72   17.17
   1  17  -1  657.96   22.42
  -1  17  -1  670.22   22.89
   1 -17  -1  660.25   21.12
  -1  17   0  629.84   21.46
   1  17   0  630.87   21.03
   1  17   1  655.05   20.65
  -1  17   1  636.17   20.84
   1  17   2  373.68   14.55
  -1  17   2  385.54   15.12
   1  17   3  656.96   18.40
  -1  17   3  519.21   17.39
   1  17   3  562.08   17.19
   1  17   4  137.39    7.53
  -1  17   4  158.80    8.54
   1  17   5  811.13   18.09
  -1  17   5  824.59   19.69
  -1  18  -9   11.75    6.13
   1  18  -9   21.10    6.23
   1  18  -8   50.88    8.53
  -1  18  -8   52.61    8.69
   1  18  -7   35.05    7.11
  -1  18  -7   27.39    7.03
   1  18  -6  149.84   12.73
  -1  18  -6  151.87   12.87
   1  18  -5   28.47    6.69
  -1  18  -5   25.32    6.29
  -1  18  -4  179.12   13.15
   1  18  -4  165.19   12.62
   1  18  -3   78.90    8.80
  -1  18  -3   71.85    8.54
   1 -18  -2   48.32    5.70
   1  18  -2   52.53    6.81
  -1  18  -2   45.63    6.71
  -1  18  -1  117.74    9.72
   1  18  -1  111.02    9.37
   1  18   0    4.43    3.46
  -1  18   0    9.25    4.50
   1  18   1  105.72    8.41
  -1  18   1  121.26    9.12
   1  18   2   46.07    5.53
  -1  18   2   47.11    5.76
   1  18   3   67.14    6.02
  -1  18   3   84.83    7.02
  -1  18   4  148.95    8.60
   1  18   4  164.32    8.41
   1  19  -8  191.59   15.34
  -1  19  -8  204.44   16.23
  -1  19  -7  122.91   12.52
   1  19  -7  139.45   13.04
  -1  19  -6  236.99   16.36
   1  19  -6  210.14   15.73
  -1  19  -5  202.07   14.77
   1  19  -5  193.73   14.33
   1  19  -4   70.63    9.06
  -1  19  -4   85.28    9.64
   1  19  -3  282.12   16.22
  -1  19  -3  282.50   16.32
   1  19  -2  273.83   15.42
  -1  19  -2  280.88   15.77
   1  19  -1  447.56   19.07
  -1  19  -1  408.44   18.61
  -1  19   0  150.71   10.93
   1  19   0  160.62   10.93
   1  19   1  430.81   17.51
  -1  19   1  450.71   18.13
   1  19   2  252.41   12.60
  -1  19   2  272.45   13.39
   1  19   3  292.14   12.79
  -1  19   3  321.98   13.91
   1  20  -7  253.24   17.91
  -1  20  -7  252.14   17.61
  -1  20  -6  200.46   15.60
   1  20  -6  197.31   15.09
   1  20  -5  269.39   17.32
  -1  20  -5  270.71   17.45
   1  20  -4  366.54   19.84
  -1  20  -4  383.88   20.29
  -1  20  -3  256.23   16.00
   1  20  -3  219.42   14.78
   1  20  -2  238.42   14.94
  -1  20  -2  227.06   14.78
  -1  20  -1  261.93   15.19
   1  20  -1  246.31   14.51
  -1  20   0  248.08   14.24
   1  20   0  262.86   14.45
   1  20   1  229.91   13.06
  -1  20   1  240.88   13.45
   1  20   2  234.23   12.50
  -1  20   2  224.53   12.50
  -1  20   3  260.84   12.96
  -1  21  -6   41.28    7.95
   1  21  -6   18.84    5.98
   1  21  -5   54.22    8.78
  -1  21  -5   43.20    8.14
   1  21  -4   51.48    7.97
  -1  21  -4   32.43    7.16
   1  21  -3   17.49    5.88
  -1  21  -3   26.07    6.72
   1  21  -2    8.52    4.78
  -1  21  -2    3.87    3.99
   1  21  -1   34.09    6.34
  -1  21  -1   30.54    6.33
  -1  21   0   88.52    8.99
   1  21   0   76.18    8.23
   1  21   1   40.27    5.99
  -1  21   1   35.28    5.69
  -1  21   2   10.70    3.85
   1  22  -5   45.65    9.05
  -1  22  -5   66.27    9.74
  -1  22  -4  373.63   20.98
   1  22  -4  351.84   20.08
  -1  22  -3  136.74   12.47
   1  22  -3  165.87   13.78
   1  22  -2  121.92   11.43
  -1  22  -2  130.84   11.80
   1  22  -1  261.30   15.94
  -1  22  -1  301.35   17.09
   1  22   0   71.59    8.45
  -1  22   0   62.98    8.00
  -1  22   1  290.34   15.73
   1  23  -4   71.79    9.86
  -1  23  -4   70.73    9.77
  -1  23  -3   70.81    9.61
   1  23  -3   63.41    8.95
   1  23  -2   63.91    9.02
  -1  23  -2   66.61    9.37
  -1  23  -1  147.34   12.76
   1  23  -1  151.64   12.60
   1  24  -3    6.70    4.56
  -1  24  -3   13.29    5.57
  -1  24  -2   36.30    7.47
   1  24  -2   46.47    7.64
  -2   0 -17  193.05   15.35
   2   0 -16  157.46   15.02
   2   0 -16  151.42   11.16
  -2   0 -16  138.83   12.69
   2   0 -15  930.88   28.34
   2   0 -15  961.99   35.42
  -2   0 -15 1001.26   28.65
  -2   0 -15  881.38   31.18
   2   0 -14   72.50    7.55
  -2   0 -14   57.82    7.88
  -2   0 -14   66.91    7.08
   2   0 -14   53.26    8.87
  -2   0 -13 2311.46   51.29
   2   0 -13 2328.41   55.52
  -2   0 -13 2399.54   47.72
   2   0 -13 2363.10   48.40
   2   0 -12  192.95   13.67
  -2   0 -12  217.69   11.51
   2   0 -12  193.47   11.20
  -2   0 -12  198.44   12.30
   2   0 -12  219.19   11.68
   2   0 -11  572.07   19.12
  -2   0 -11  550.93   18.21
  -2   0 -11  571.30   20.08
   2   0 -11  564.30   18.74
   2   0 -11  554.01   22.23
   2   0 -10   23.18    3.88
  -2   0 -10   23.76    4.04
   2   0 -10   26.52    4.27
  -2   0 -10   20.40    4.06
   2   0 -10   24.72    5.67
   2   0  -9  503.87   16.43
   2   0  -9  497.28   16.45
  -2   0  -9  490.81   16.54
   2   0  -9  501.10   18.96
  -2   0  -9  495.41   15.83
  -2   0  -8  170.50    8.72
   2   0  -8  176.96    9.01
  -2   0  -8  162.26    8.39
   2   0  -8  181.96    9.25
   2   0  -7 2076.35   38.80
  -2   0  -7 2160.54   38.21
  -2   0  -7 2103.81   37.53
   2   0  -6  373.70   12.60
  -2   0  -6  375.12   11.34
  -2   0  -6  363.11   11.93
  -2   0  -5 6428.93   88.17
  -2   0  -5 6451.36   91.17
   2   0  -5 6362.46   91.97
  -2   0  -4  581.92   12.20
   2   0  -4  592.89   15.34
  -2   0  -4  598.40   15.01
   2   0  -3 4788.15   70.56
  -2   0  -3 4933.50   70.25
  -2   0  -2 2146.43   35.23
   2   0  -2 2126.30   35.46
  -2   0  -1 2674.42   42.31
   2   0  -1 2746.73   42.51
  -2   0   0 2068.98   34.50
   2   0   0 2097.57   34.57
  -2   0   1 2525.02   39.85
   2   0   1 2466.60   39.60
  -2   0   2 2202.75   35.91
   2   0   2 2121.11   35.17
  -2   0   3 4810.25   69.39
   2   0   3 4717.31   68.55
  -2   0   4  619.36   15.66
   2   0   4  605.08   15.03
   2   0   5 6311.64   89.65
   2   0   6  389.53   12.33
   2   0   7 2010.00   36.53
   2   0   8  174.68    8.64
   2   0   9  444.79   14.82
   2   0  10   18.02    3.43
   2   0  11  553.10   18.01
   2   0  12  209.32   11.11
   2   0  13 2350.16   47.02
  -2   1 -17   21.74    6.79
   2   1 -16   89.13   11.61
   2   1 -16   76.57    8.45
   2  -1 -16   97.32   11.69
  -2   1 -16   69.54    9.27
  -2   1 -16   83.17    8.64
   2  -1 -15   38.79    5.63
   2   1 -15   35.96    5.85
  -2   1 -15   40.22    7.59
   2  -1 -15   42.43    8.76
  -2  -1 -15   42.45    7.38
  -2   1 -15   31.71    5.32
   2   1 -15   28.29    6.99
  -2  -1 -15   37.41    5.46
   2   1 -14  214.85   12.96
   2  -1 -14  238.21   12.73
   2  -1 -14  225.35   16.42
  -2  -1 -14  197.58   13.65
  -2   1 -14  241.82   13.44
  -2   1 -14  215.36   14.01
  -2  -1 -14  220.64   11.90
   2   1 -14  230.30   16.43
   2  -1 -13   88.90    7.78
  -2  -1 -13   77.24    8.40
  -2  -1 -13   93.44    7.64
  -2   1 -13   95.72    8.61
   2   1 -13   72.37    9.37
   2   1 -13   89.32    8.56
  -2   1 -13   79.63    8.43
   2  -1 -13   88.24    7.99
   2  -1 -13   92.86   10.46
  -2   1 -12  207.25   11.56
   2   1 -12  206.25   11.78
   2  -1 -12  204.01   11.02
  -2  -1 -12  216.64   11.09
  -2  -1 -12  182.21   11.88
   2  -1 -12  196.55   13.89
  -2   1 -12  200.74   12.22
   2   1 -12  198.12   13.81
   2  -1 -12  195.13   10.94
   2  -1 -11    6.05    4.50
   2   1 -11    7.44    4.44
  -2   1 -11   -1.48    3.36
  -2   1 -11    4.12    3.31
   2  -1 -11    2.75    2.66
   2   1 -11    2.85    2.60
   2   1 -11    0.10    2.62
  -2  -1 -11    4.03    2.51
  -2  -1 -11   -3.16    3.32
   2  -1 -11    3.79    2.94
  -2  -1 -10   37.47    4.40
  -2   1 -10   37.88    5.13
   2  -1 -10   31.96    4.31
   2  -1 -10   38.57    4.80
   2   1 -10   38.20    5.13
   2   1 -10   42.05    5.42
   2  -1 -10   44.17    6.50
  -2  -1 -10   34.85    5.32
  -2   1 -10   35.13    4.77
   2   1  -9  114.59    7.94
  -2   1  -9  128.09    8.19
   2   1  -9  126.05    8.19
  -2   1  -9  128.48    8.07
  -2  -1  -9  121.41    7.32
   2  -1  -9  112.67    7.42
   2  -1  -9  115.20    7.48
  -2  -1  -9  119.53    8.14
   2  -1  -9  130.89    9.89
  -2   1  -8  127.65    7.49
   2  -1  -8  126.54    7.46
   2   1  -8  121.65    7.79
  -2   1  -8  126.82    7.73
  -2  -1  -8  125.02    7.13
   2   1  -8  116.76    7.62
   2  -1  -8  122.70    8.89
  -2  -1  -8  126.47    7.67
   2  -1  -7   15.07    2.98
   2  -1  -7   23.92    4.46
  -2   1  -7   18.36    3.10
  -2  -1  -7   18.35    3.10
  -2   1  -7   17.85    3.31
  -2  -1  -7   22.32    3.14
   2   1  -7   16.75    3.20
  -2   1  -6  387.99   12.99
   2  -1  -6  401.23   12.81
  -2  -1  -6  418.70   12.35
   2   1  -6  405.38   13.54
  -2  -1  -6  395.38   12.19
   2  -1  -6  413.05   14.46
  -2   1  -6  427.78   11.95
  -2   1  -5  158.12    6.22
   2  -1  -5  172.40    7.92
   2   1  -5  162.03    8.00
  -2   1  -5  153.55    7.68
   2  -1  -5  154.65    8.36
  -2  -1  -5  152.70    7.10
  -2  -1  -4 1611.83   28.62
  -2   1  -4 1595.33   25.21
   2  -1  -4 1592.52   29.31
   2  -1  -4 1614.64   29.93
  -2   1  -4 1606.03   29.76
   2   1  -4 1623.22   30.13
  -2  -1  -3  276.72    9.14
  -2   1  -3  282.58    9.73
   2  -1  -3  291.37    9.61
  -2   1  -3  271.53    6.10
   2   1  -3  282.13    9.84
   2  -1  -2 1838.70   32.08
   2   1  -2 1892.43   32.38
  -2  -1  -2 1884.06   31.57
  -2   1  -2 1908.44   32.43
  -2  -1  -1 1066.32   21.02
  -2   1  -1 1086.12   21.42
   2  -1  -1 1098.63   21.24
   2  -1  -1 1071.12   17.92
   2   1  -1 1082.05   21.31
   2  -1   0 1505.38   21.91
  -2   1   0 1605.88   27.78
   2   1   0 1616.62   27.64
   2  -1   0 1527.01   27.58
  -2  -1   0 1629.09   27.69
   2   1   1 1055.16   20.86
  -2   1   1 1069.15   21.14
  -2  -1   1 1066.63   21.25
   2  -1   1 1073.46   21.18
   2  -1   2 1871.27   32.09
  -2   1   2 1922.56   32.07
   2   1   2 1849.90   31.36
  -2  -1   2 1871.29   32.50
   2  -1   3  268.98    9.43
  -2  -1   3  288.76   10.09
   2   1   3  275.91    9.14
  -2   1   3  283.45    9.64
   2   1   3  280.71    7.21
  -2   1   4 1592.95   28.87
   2  -1   4 1583.41   29.37
   2   1   4 1555.99   28.12
   2   1   4 1600.65   26.08
  -2   1   5  164.83    7.60
   2   1   5  152.81    6.99
   2  -1   5  161.77    7.78
   2  -1   6  396.40   12.86
   2   1   6  403.49   12.15
   2  -1   7   11.55    3.00
   2   1   7   12.07    2.94
   2  -1   8  112.33    7.27
   2   1   8  118.67    6.87
   2  -1   9  106.94    7.93
   2   1   9  114.12    7.03
   2  -1  10   28.95    4.40
   2   1  10   36.79    4.47
   2   1  11    5.50    3.11
   2  -1  11    0.83    2.15
   2   1  12  198.09   10.47
   2  -1  12  198.13   11.12
   2   1  13  101.53    7.82
  -2   2 -17  126.03   12.34
  -2   2 -16    8.71    4.41
   2   2 -16   10.09    4.36
   2   2 -16   25.03    6.94
  -2   2 -16   18.02    4.93
   2  -2 -16   17.77    7.32
   2  -2 -15  323.71   14.89
   2   2 -15  301.53   16.28
   2  -2 -15  286.00   19.03
  -2   2 -15  295.88   17.31
   2   2 -15  298.28   19.51
  -2   2 -15  304.66   16.08
  -2  -2 -14   90.32    7.40
  -2   2 -14   75.71    8.73
   2   2 -14   94.44   10.82
  -2   2 -14   95.67    8.94
   2  -2 -14   96.77   11.57
   2   2 -14   95.79    9.13
   2  -2 -14   84.51    7.44
   2   2 -13  712.38   24.33
   2  -2 -13  809.65   23.06
   2  -2 -13  746.67   28.70
  -2   2 -13  752.80   24.52
   2  -2 -13  698.63   22.00
   2   2 -13  720.20   28.04
  -2  -2 -13  770.93   22.02
  -2   2 -13  739.09   25.45
  -2   2 -12   59.98    7.11
   2   2 -12   53.52    6.44
   2  -2 -12   56.66    5.94
  -2   2 -12   56.87    6.57
  -2  -2 -12   56.89    5.62
   2   2 -12   48.31    7.73
   2  -2 -12   55.86    8.10
   2  -2 -12   63.39    6.19
  -2   2 -11 1072.05   28.80
   2  -2 -11 1095.35   32.63
   2   2 -11 1099.10   29.36
   2  -2 -11 1106.84   26.43
  -2   2 -11 1100.76   28.80
  -2  -2 -11 1124.76   26.08
   2  -2 -11 1084.81   26.65
   2   2 -11 1075.07   28.94
  -2   2 -10   13.30    3.78
   2  -2 -10   10.55    4.30
   2  -2 -10   15.62    3.32
   2   2 -10   11.72    3.48
   2  -2 -10   13.86    3.10
   2   2 -10   15.07    3.84
  -2  -2 -10   10.09    2.84
  -2   2 -10    6.71    2.89
  -2   2  -9  431.34   15.17
   2  -2  -9  433.70   17.70
   2   2  -9  458.53   16.52
   2  -2  -9  410.93   14.13
  -2   2  -9  422.13   15.51
   2   2  -9  441.24   16.07
   2  -2  -9  405.21   13.86
  -2  -2  -9  430.13   13.62
   2   2  -8  237.73   11.41
   2  -2  -8  230.87   12.23
  -2   2  -8  244.62   11.04
   2   2  -8  217.74   10.79
   2  -2  -8  231.06    9.89
  -2  -2  -8  227.84    9.25
  -2   2  -8  233.67   10.18
  -2   2  -7  680.87   19.00
  -2  -2  -7  688.47   16.86
  -2   2  -7  706.89   17.57
   2  -2  -7  734.71   21.30
   2   2  -7  697.76   19.58
   2   2  -7  726.68   19.76
   2  -2  -7  691.08   17.84
   2   2  -6  180.54    9.13
   2  -2  -6  166.09    9.32
   2  -2  -6  165.70    7.74
  -2   2  -6  183.09    9.05
  -2   2  -6  175.39    7.38
  -2  -2  -6  171.30    7.37
   2  -2  -5 1736.89   33.72
   2   2  -5 1776.46   33.72
   2  -2  -5 1759.20   31.67
  -2   2  -5 1775.14   33.23
  -2  -2  -5 1747.86   30.57
   2  -2  -4  109.35    6.39
   2  -2  -4   96.22    5.74
  -2  -2  -4   98.31    5.37
  -2   2  -4  109.85    6.49
   2   2  -4   98.20    6.33
   2  -2  -3 2677.26   42.47
   2   2  -3 2727.81   44.00
  -2   2  -3 2687.64   43.92
   2  -2  -3 2665.43   42.39
  -2  -2  -3 2644.45   41.70
   2  -2  -2  878.13   18.52
  -2  -2  -2  875.48   18.01
   2  -2  -2  875.29   17.18
   2   2  -2  893.02   19.38
  -2   2  -2  878.70   19.18
   2   2  -1  935.36   19.74
  -2  -2  -1  940.46   19.03
   2  -2  -1  930.63   19.35
   2  -2  -1  941.73   16.42
  -2   2  -1  955.70   19.96
  -2   2   0  104.60    5.89
   2   2   0  105.12    5.62
  -2  -2   0   90.99    5.38
   2  -2   0  112.74    5.81
  -2   2   1  988.00   20.09
   2  -2   1  967.31   20.25
   2   2   1  998.58   19.70
  -2  -2   1  980.63   20.24
  -2  -2   2  843.96   18.73
  -2   2   2  861.20   18.10
   2  -2   2  807.89   18.34
   2   2   2  821.85   17.27
  -2  -2   3 2562.78   42.81
   2  -2   3 2657.55   42.78
  -2   2   3 2618.54   41.45
   2   2   3 2568.45   40.51
   2   2   4   98.15    4.98
   2  -2   4   94.92    6.03
   2   2   4  100.80    5.32
  -2   2   4  107.29    5.81
   2   2   5 1688.85   29.71
  -2   2   5 1691.72   30.63
   2   2   5 1693.75   29.68
   2  -2   5 1732.64   32.28
   2  -2   6  198.55    9.16
   2   2   6  180.66    8.05
   2   2   6  187.20    7.66
   2   2   7  675.32   16.61
   2  -2   7  689.95   18.91
   2  -2   8  218.93   10.44
   2   2   8  228.87    9.19
   2  -2   9  400.33   14.93
   2   2   9  399.13   12.91
   2  -2  10   13.23    3.62
   2   2  10   15.11    3.11
   2   2  11 1073.53   25.18
   2  -2  11 1122.77   28.88
   2   2  12   56.10    5.42
   2   2  13  751.87   21.38
  -2   3 -17   44.74    7.99
   2   3 -17   69.71    9.32
   2   3 -16  228.22   14.93
  -2   3 -16  241.14   15.11
  -2   3 -16  215.59   15.66
   2   3 -16  241.20   18.18
   2   3 -15   81.15    8.97
   2  -3 -15   96.40   11.38
  -2   3 -15   95.89   10.13
   2   3 -15   88.89   11.15
  -2   3 -15   92.64    9.22
   2   3 -14 1078.02   32.34
   2  -3 -14 1142.66   28.27
  -2   3 -14 1029.58   32.55
   2   3 -14 1071.63   36.52
   2  -3 -14 1094.04   37.23
  -2  -3 -14 1127.34   27.17
  -2   3 -14 1112.91   32.38
   2   3 -13  214.56   13.16
   2  -3 -13  219.76   11.05
  -2   3 -13  202.86   12.69
   2  -3 -13  201.86   10.88
   2  -3 -13  215.36   15.22
  -2  -3 -13  236.15   10.92
  -2   3 -13  207.20   13.08
   2  -3 -12  915.22   30.82
  -2   3 -12  876.83   26.73
   2  -3 -12  890.37   23.73
  -2  -3 -12  909.23   22.71
   2  -3 -12  902.23   23.42
   2   3 -12  903.45   27.30
  -2   3 -12  901.51   27.17
   2  -3 -11   75.79    6.21
   2   3 -11   74.32    7.47
  -2   3 -11   75.93    7.44
   2  -3 -11   72.97    6.02
   2  -3 -11   75.50    8.45
  -2  -3 -11   69.19    5.65
  -2   3 -11   72.38    7.40
   2  -3 -10  936.25   23.41
   2   3 -10 1003.57   27.55
   2   3 -10  958.92   26.74
   2  -3 -10  966.04   29.25
  -2   3 -10  952.65   26.45
  -2  -3 -10 1026.64   22.80
  -2   3 -10 1030.43   26.49
   2  -3 -10 1005.26   23.52
   2   3  -9   45.91    5.70
   2  -3  -9   49.67    4.69
  -2   3  -9   49.07    5.34
   2  -3  -9   34.90    5.62
   2   3  -9   50.95    5.74
  -2   3  -9   43.68    5.38
  -2  -3  -9   52.08    4.49
   2  -3  -9   45.63    4.50
   2  -3  -8  500.27   18.26
  -2   3  -8  473.46   16.44
   2   3  -8  508.67   17.32
   2   3  -8  486.35   16.88
   2  -3  -8  480.44   14.47
  -2  -3  -8  508.94   13.83
   2  -3  -7  153.78    7.51
   2   3  -7  161.42    9.25
   2  -3  -7  167.00    9.98
  -2   3  -7  174.13    9.30
  -2  -3  -7  155.74    6.99
   2   3  -7  162.96    9.11
   2  -3  -6 2746.70   48.61
  -2   3  -6 2726.11   47.39
   2   3  -6 2730.11   47.92
  -2  -3  -6 2706.57   42.82
   2  -3  -6 2662.39   44.02
  -2  -3  -5   92.38    5.13
   2   3  -5   97.13    6.74
   2  -3  -5   92.92    5.53
   2  -3  -5  105.10    6.99
  -2   3  -5   94.98    6.59
   2  -3  -4 4682.99   69.48
   2   3  -4 4805.84   72.76
  -2   3  -4 4954.30   72.62
  -2  -3  -4 4760.65   68.26
   2  -3  -4 4821.89   71.59
   2  -3  -3  269.66    9.15
   2   3  -3  256.25    9.94
  -2  -3  -3  246.83    8.38
   2  -3  -3  263.62    9.27
  -2   3  -3  263.29   10.05
  -2   3  -2 1566.53   28.88
  -2  -3  -2 1526.74   26.69
   2  -3  -2 1497.69   27.21
   2   3  -2 1542.21   28.72
   2  -3  -2 1516.20   26.17
  -2  -3  -1  274.90    8.98
   2   3  -1  262.00    9.44
  -2   3  -1  264.43    9.52
   2  -3  -1  273.95    9.16
  -2  -3   0  243.55    8.64
  -2   3   0  238.26    6.12
   2  -3   0  239.08    8.79
   2   3   0  249.18    8.66
  -2   3   0  241.92    8.85
   2   3   1  283.44    9.04
  -2   3   1  279.40    9.45
  -2   3   1  283.18    7.70
   2  -3   1  281.88    9.68
  -2  -3   1  270.78    9.63
  -2   3   2 1507.45   27.43
  -2  -3   2 1531.01   28.50
   2  -3   2 1502.92   28.46
   2   3   2 1532.78   26.76
  -2   3   2 1523.12   26.06
   2  -3   3  241.27    9.53
  -2   3   3  257.09    8.93
   2   3   3  242.93    8.21
   2   3   4 4769.56   68.65
   2  -3   4 4778.18   71.89
   2   3   4 4727.56   67.95
  -2   3   4 4865.28   69.33
  -2   3   5   95.96    5.60
   2   3   5   92.29    5.54
   2  -3   5   97.72    6.61
   2   3   5  101.43    5.30
   2  -3   6 2714.01   47.41
  -2   3   6 2743.69   43.94
   2   3   6 2653.47   42.34
   2   3   6 2733.10   45.35
   2   3   7  154.51    6.84
   2  -3   7  141.32    8.42
   2   3   7  146.31    7.96
   2  -3   8  469.17   16.34
   2   3   8  495.11   13.55
   2  -3   9   50.42    5.47
   2   3   9   48.84    4.41
   2  -3  10  970.86   26.41
   2   3  10  930.76   21.53
   2   3  11   61.92    5.38
   2   3  12  925.47   22.55
   2   4 -17   28.38    7.04
  -2   4 -17   14.53    5.52
  -2   4 -17   32.92    7.20
   2   4 -16   17.87    5.84
  -2   4 -16   16.12    5.44
  -2   4 -16   12.34    5.09
   2  -4 -15    6.80    4.80
   2   4 -15    3.10    3.74
  -2   4 -15    6.96    4.59
   2   4 -15   11.92    5.02
  -2   4 -15   15.24    5.48
   2  -4 -14   17.21    3.60
  -2   4 -14   28.76    6.24
   2  -4 -14   14.86    6.08
  -2   4 -14   19.90    4.96
   2   4 -14   21.71    5.43
   2  -4 -13   38.97    7.17
   2   4 -13   49.51    6.97
  -2   4 -13   51.33    6.87
  -2   4 -13   39.77    6.51
   2  -4 -13   47.10    5.06
  -2  -4 -13   46.31    4.70
  -2  -4 -12   20.19    3.70
   2  -4 -12   26.48    4.12
   2   4 -12   20.00    4.82
  -2   4 -12   21.14    5.28
  -2   4 -12   19.69    5.00
   2  -4 -12   20.10    5.91
   2  -4 -12   19.69    3.75
   2  -4 -11  176.94    9.12
  -2   4 -11  194.87   11.92
   2  -4 -11  182.99   12.87
   2  -4 -11  192.82    9.29
  -2   4 -11  182.93   11.12
  -2  -4 -11  193.93    8.69
   2   4 -11  200.36   12.26
  -2  -4 -10  155.32    7.46
   2   4 -10  153.50   10.25
   2  -4 -10  150.43   11.39
   2  -4 -10  147.62    7.84
  -2   4 -10  155.63   10.19
   2  -4 -10  141.76    7.87
  -2   4  -9  184.10   10.70
   2  -4  -9  191.33   11.90
   2   4  -9  188.29   10.87
   2  -4  -9  180.91    8.54
   2  -4  -9  186.97    8.45
  -2  -4  -9  182.00    8.07
   2   4  -9  196.45   11.12
   2  -4  -8   94.16    5.91
   2   4  -8  106.06    7.91
  -2   4  -8  100.04    7.91
   2  -4  -8  109.82    8.73
  -2  -4  -8  104.32    5.62
   2   4  -8   93.86    7.52
  -2   4  -7  108.77    7.72
   2  -4  -7  105.74    6.03
  -2  -4  -7  113.27    5.68
   2   4  -7  115.12    8.07
   2  -4  -7  118.94    8.47
   2   4  -7  124.71    8.37
   2  -4  -6  111.88    6.08
   2   4  -6  116.41    7.74
   2   4  -6  124.85    7.86
  -2   4  -6  116.34    7.75
   2  -4  -6  127.63    8.32
  -2  -4  -6  114.86    5.60
  -2  -4  -5    4.84    1.69
   2   4  -5    4.00    2.62
   2  -4  -5    4.39    1.96
   2  -4  -5    0.76    2.75
  -2   4  -5    3.99    3.03
   2   4  -4  229.47   10.05
  -2   4  -4  230.34    9.97
  -2  -4  -4  220.00    7.70
   2  -4  -4  238.16    9.77
   2  -4  -4  229.65    8.51
   2   4  -3  362.32   12.23
  -2  -4  -3  326.50    9.67
  -2   4  -3  344.96   11.90
   2  -4  -3  350.42   10.56
  -2   4  -2  268.55   10.27
  -2  -4  -2  265.98    8.77
   2   4  -2  285.85   10.42
   2  -4  -2  288.92    9.42
  -2   4  -1  690.73   16.91
   2   4  -1  723.88   17.15
  -2  -4  -1  699.85   15.85
   2  -4  -1  690.78   16.22
  -2  -4   0  411.01   11.81
   2  -4   0  400.92   11.82
  -2   4   0  414.89   12.14
   2   4   0  400.53   11.74
   2  -4   1  658.08   16.45
  -2  -4   1  680.99   16.63
   2   4   1  706.08   15.87
  -2   4   1  707.56   14.48
  -2   4   1  703.63   16.29
  -2   4   2  280.37    9.48
   2   4   2  275.34    8.95
  -2   4   2  286.12    9.12
   2  -4   2  283.01   10.23
  -2   4   3  346.43   10.95
   2  -4   3  337.18   11.66
   2   4   3  325.53    9.63
  -2   4   3  338.48   10.36
  -2   4   4  227.96    8.42
   2   4   4  219.85    7.61
  -2   4   4  217.38    9.30
   2  -4   4  231.64    9.84
  -2   4   5    2.02    1.96
   2  -4   5    4.03    2.28
   2   4   5    2.83    2.06
   2   4   5    2.85    1.53
   2  -4   6  108.91    7.55
   2   4   6  110.24    5.35
  -2   4   6  104.20    5.79
   2   4   6  117.10    7.04
   2   4   7  109.29    5.43
   2  -4   7  106.07    7.56
   2   4   7  111.60    7.20
   2  -4   8  101.36    7.61
   2   4   8   95.02    5.29
   2   4   8  101.57    7.33
   2  -4   9  189.23   10.69
   2   4   9  180.73    7.60
   2   4  10  157.52    7.36
   2  -4  10  155.81   10.19
   2   4  11  193.54    8.47
   2   4  12   23.25    3.58
  -2   5 -17   15.19    5.92
   2   5 -17   19.23    5.74
  -2   5 -17   16.55    5.60
   2   5 -16   84.64   10.00
  -2   5 -16  108.05   11.07
  -2   5 -16   84.21   10.06
   2   5 -15   21.29    5.72
   2  -5 -15   26.82    7.23
  -2   5 -15   11.97    4.93
  -2   5 -15   24.79    6.04
   2  -5 -14  548.00   25.74
  -2   5 -14  503.35   21.92
   2   5 -14  511.13   22.41
  -2   5 -14  522.88   22.42
   2  -5 -13   73.37    5.86
   2   5 -13   62.62    7.81
  -2  -5 -13   75.01    5.31
  -2   5 -13   66.92    7.87
  -2   5 -13   66.95    8.11
   2  -5 -13   73.62    9.33
   2  -5 -12 2117.86   51.66
   2  -5 -12 2158.85   39.27
   2  -5 -12 2092.17   39.53
  -2  -5 -12 2216.25   37.56
  -2   5 -12 2116.29   48.12
  -2   5 -12 2092.46   46.32
   2   5 -12 2119.89   48.16
   2  -5 -11  139.09    7.53
   2   5 -11  117.84    9.70
  -2   5 -11  140.61   10.46
   2  -5 -11  118.67   10.47
   2  -5 -11  124.79    7.35
  -2  -5 -11  129.11    6.57
   2  -5 -10  873.58   20.35
   2  -5 -10  821.96   20.26
  -2  -5 -10  877.88   18.97
  -2   5 -10  833.60   25.66
   2   5 -10  854.89   26.07
   2  -5 -10  840.31   27.50
   2  -5  -9  377.54   12.26
  -2  -5  -9  388.87   11.11
  -2   5  -9  392.05   16.14
   2  -5  -9  361.70   16.74
   2   5  -9  378.36   16.06
   2   5  -8  828.33   23.89
   2  -5  -8  800.08   18.88
  -2  -5  -8  828.75   17.37
  -2   5  -8  828.60   23.84
   2  -5  -8  801.01   24.54
   2  -5  -7  109.32    5.94
  -2  -5  -7  114.18    5.37
   2   5  -7  109.31    8.07
  -2   5  -7  107.82    8.01
   2  -5  -7  104.98    8.08
   2  -5  -6 2569.77   42.10
   2  -5  -6 2604.79   48.31
  -2  -5  -6 2600.21   40.25
  -2   5  -6 2679.44   48.32
   2   5  -6 2720.73   48.65
   2   5  -6 2618.04   48.15
   2   5  -5    5.42    3.15
  -2   5  -5    3.13    2.99
   2  -5  -5    3.73    1.97
  -2  -5  -5    1.04    1.46
   2   5  -5   -0.46    2.60
   2   5  -4 3644.05   58.70
  -2   5  -4 3670.46   58.62
  -2  -5  -4 3542.59   52.11
   2  -5  -4 3463.86   53.67
   2   5  -3  309.59   11.63
  -2   5  -3  299.38   11.51
  -2  -5  -3  289.77    8.97
   2  -5  -3  299.23    9.76
   2   5  -2 3377.30   53.44
  -2  -5  -2 3278.13   49.72
  -2   5  -2 3387.92   53.45
   2  -5  -2 3258.15   50.90
   2  -5  -1  373.56   11.53
  -2  -5  -1  383.74   11.19
  -2   5  -1  405.24   12.62
   2   5  -1  386.39   12.04
   2  -5   0  280.09    9.90
  -2  -5   0  273.68    9.68
   2   5   0  273.60    9.71
  -2   5   0  290.15   10.17
   2   5   1  367.88   10.97
  -2   5   1  380.85   11.63
   2  -5   1  377.44   12.06
  -2   5   2 3259.58   50.21
   2  -5   2 3276.53   52.43
  -2   5   2 3233.71   50.00
   2   5   2 3230.90   49.04
   2   5   3  280.82    8.82
  -2   5   3  291.26    9.65
  -2   5   3  268.98   10.12
   2  -5   3  274.80   10.93
   2   5   4 3495.94   52.15
  -2   5   4 3550.33   53.86
   2  -5   4 3624.85   58.35
  -2   5   4 3636.20   57.37
  -2   5   5    4.91    2.89
  -2   5   5    2.45    1.79
   2  -5   5    5.33    2.70
   2   5   5    2.52    2.08
   2   5   5    3.64    1.48
  -2   5   6 2656.19   48.60
  -2   5   6 2650.78   42.51
   2   5   6 2591.95   40.42
   2   5   6 2677.62   46.72
   2  -5   6 2785.70   48.93
   2  -5   7  112.32    7.88
   2   5   7  104.54    7.35
   2   5   7  107.61    5.14
   2   5   8  838.64   22.99
   2  -5   8  830.99   23.77
   2   5   8  800.26   16.93
   2  -5   9  414.30   16.55
   2   5   9  375.41   15.43
   2   5   9  385.66   10.89
   2   5  10  829.76   18.05
   2   5  11  134.18    6.48
   2   5  12 2113.24   36.48
  -2   6 -17   93.30   11.41
   2   6 -17   81.77   10.23
  -2   6 -17   95.04   11.00
   2   6 -16    0.44    4.58
  -2   6 -16    7.97    4.47
  -2   6 -16   -0.50    5.36
   2   6 -15   53.65    8.18
  -2   6 -15   64.04    8.78
  -2   6 -15   53.73    8.10
   2   6 -14   29.75    6.48
  -2   6 -14   24.96    5.89
  -2   6 -14   28.70    6.40
   2  -6 -13  346.95   12.07
  -2   6 -13  335.09   17.72
  -2   6 -13  351.55   17.21
   2   6 -13  343.34   17.90
  -2   6 -12   25.70    5.81
   2  -6 -12   19.83    3.22
  -2  -6 -12   23.72    2.94
   2   6 -12   16.39    5.23
   2  -6 -11  487.93   21.63
  -2   6 -11  482.23   19.87
   2   6 -11  493.68   20.24
  -2  -6 -11  502.48   12.51
   2  -6 -11  453.75   14.00
   2  -6 -11  496.91   14.26
  -2  -6 -10   95.36    5.10
   2  -6 -10   90.04    5.58
   2   6 -10   90.46    8.42
  -2   6 -10  102.23    8.99
   2  -6 -10   91.25    9.27
   2  -6 -10   99.08    6.00
  -2   6  -9  346.82   15.61
   2  -6  -9  339.51   11.21
  -2  -6  -9  366.74    9.91
   2   6  -9  358.83   16.02
   2  -6  -8  140.50    6.81
  -2  -6  -8  158.32    6.02
  -2   6  -8  141.88    9.74
   2   6  -8  149.78   10.13
   2   6  -7  372.92   15.33
  -2  -6  -7  387.85    9.92
  -2   6  -7  385.51   15.42
   2  -6  -7  344.41   10.91
  -2  -6  -6   15.30    2.09
   2   6  -6   10.25    3.53
   2  -6  -6   10.83    2.22
  -2   6  -6   20.29    4.21
   2  -6  -5  826.89   18.26
  -2   6  -5  868.30   22.94
   2   6  -5  894.36   23.11
  -2  -6  -5  854.39   16.87
  -2   6  -4  279.48   11.77
   2  -6  -4  264.51    9.20
   2   6  -4  282.84   11.64
  -2  -6  -4  268.82    8.32
   2   6  -4  274.92   11.66
  -2   6  -3 1867.25   35.45
   2   6  -3 1825.57   35.06
  -2  -6  -3 1799.19   30.24
   2  -6  -3 1785.24   31.48
  -2  -6  -2  193.38    7.48
   2   6  -2  204.36    9.21
   2  -6  -2  187.11    7.82
  -2   6  -2  213.58    9.46
   2   6  -1 1622.04   30.64
   2  -6  -1 1564.50   29.43
  -2   6  -1 1660.85   31.24
  -2   6   0  136.31    7.16
   2   6   0  134.16    6.92
   2  -6   0  133.07    7.05
   2  -6   1 1584.50   30.78
   2   6   1 1628.32   29.21
  -2   6   1 1607.72   29.88
   2  -6   2  201.91    9.29
   2   6   2  209.02    7.88
  -2   6   2  216.09    8.57
  -2   6   2  195.48    8.41
  -2   6   3 1827.00   31.94
   2   6   3 1816.41   30.61
   2  -6   3 1788.46   35.09
  -2   6   3 1841.92   33.87
  -2   6   4  269.61   11.07
   2  -6   4  285.41   11.74
  -2   6   4  278.14    9.42
   2   6   4  263.37    8.39
   2  -6   5  861.65   22.70
  -2   6   5  880.54   22.64
  -2   6   5  853.10   18.33
   2   6   5  816.65   16.58
  -2   6   6   16.45    2.52
   2  -6   6   20.13    3.88
   2   6   6   19.15    3.86
  -2   6   6   17.74    3.85
   2   6   6   17.90    2.29
   2   6   7  387.58    9.93
   2   6   7  396.83   14.94
  -2   6   7  411.32   16.13
   2  -6   7  409.57   15.91
  -2   6   7  387.30   11.37
   2   6   8  153.24    9.61
   2  -6   8  168.94   10.37
   2   6   8  138.66    5.61
   2   6   9  375.02    9.86
   2   6   9  357.82   15.46
   2   6  10  102.63    4.99
   2   6  11  468.23   11.83
  -2   7 -17   28.33    7.18
  -2   7 -17   30.26    7.40
  -2   7 -16   38.98    7.70
  -2   7 -16   34.95    7.37
   2   7 -16   29.43    6.88
   2   7 -15   25.88    6.83
  -2   7 -15   31.31    7.01
  -2   7 -15   31.61    7.29
   2   7 -14  157.83   12.87
  -2   7 -14  150.98   12.65
  -2   7 -14  156.34   12.26
   2   7 -13   52.23    7.71
  -2   7 -13   68.86    8.57
   2   7 -12  396.05   19.43
  -2   7 -12  377.40   18.51
   2  -7 -12  408.74   12.12
  -2  -7 -11   88.69    3.98
   2  -7 -11   86.32    5.30
  -2   7 -11   90.88    9.10
   2   7 -11   84.67    8.75
   2  -7 -11   84.51    5.30
   2   7 -10  357.28   16.94
   2  -7 -10  347.24   11.09
  -2   7 -10  349.34   16.68
  -2  -7 -10  388.18    8.98
   2  -7 -10  354.54   11.05
   2   7  -9    3.37    3.41
  -2   7  -9    9.78    4.12
   2  -7  -9    3.81    1.82
  -2  -7  -9    4.56    1.27
   2   7  -8  110.72    8.89
  -2   7  -8   99.19    8.44
  -2  -7  -8  102.10    4.37
   2  -7  -8   96.98    5.46
   2   7  -7   48.53    5.98
  -2   7  -7   54.36    6.29
  -2  -7  -7   52.68    3.16
   2  -7  -7   47.62    3.79
  -2   7  -6  389.41   15.47
   2   7  -6  420.65   16.05
  -2  -7  -6  400.42    9.80
   2  -7  -6  380.65   11.21
   2   7  -5   22.08    4.50
  -2  -7  -5   23.49    2.38
  -2   7  -5   18.38    4.20
   2  -7  -5   21.32    2.79
  -2  -7  -4 1168.52   21.23
   2  -7  -4 1100.74   22.39
  -2   7  -4 1151.22   27.59
   2   7  -4 1167.90   27.25
   2   7  -3    9.89    3.37
  -2   7  -3    9.65    3.29
   2  -7  -3    7.18    2.17
   2   7  -3    8.20    2.76
   2   7  -2  119.02    7.32
   2  -7  -2  108.59    6.15
  -2   7  -2  117.52    7.39
  -2   7  -1  137.49    7.80
   2   7  -1  138.19    7.48
   2  -7  -1  126.39    6.89
   2  -7   0  813.91   19.96
   2   7   0  844.41   19.75
  -2   7   0  884.04   20.55
   2  -7   1  130.45    7.50
  -2   7   1  126.18    6.87
   2   7   1  116.90    6.33
   2  -7   2  111.22    7.24
   2   7   2  123.75    6.11
  -2   7   2  126.94    6.67
  -2   7   3    6.57    2.52
  -2   7   3    7.12    2.64
   2  -7   3    6.56    2.86
   2   7   3    8.66    2.20
   2   7   4 1172.97   21.97
   2  -7   4 1216.37   27.96
  -2   7   4 1197.16   23.54
  -2   7   4 1234.16   27.39
   2   7   5   18.95    2.36
  -2   7   5   21.53    3.83
  -2   7   5   18.43    2.87
   2  -7   5   17.56    3.65
  -2   7   6  387.61   15.39
   2  -7   6  419.56   15.88
   2   7   6  387.43    9.73
   2   7   6  418.30   15.20
  -2   7   6  402.87   11.44
  -2   7   7   48.54    3.86
   2  -7   7   66.26    6.85
   2   7   7   53.33    5.79
   2   7   7   55.06    3.28
  -2   7   7   49.83    5.93
   2   7   8  103.87    4.34
   2   7   8  116.02    8.59
   2   7   9    2.61    1.28
   2   7  10  368.08    8.74
  -2   8 -17  158.12   14.45
   2   8 -16    6.77    4.90
  -2   8 -16    5.73    4.68
  -2   8 -16    7.68    5.58
   2   8 -15  333.80   19.71
  -2   8 -15  317.13   19.24
  -2   8 -15  315.97   18.35
   2   8 -14   11.81    5.37
  -2   8 -14   -0.25    4.02
  -2   8 -13  916.93   31.35
   2   8 -13  894.95   31.32
   2   8 -12  126.54   11.27
  -2   8 -12  137.82   11.69
  -2   8 -11 1427.53   38.60
   2   8 -11 1448.89   39.01
   2  -8 -11 1434.06   25.68
   2   8 -10  238.85   14.19
   2  -8 -10  261.37    8.62
  -2   8 -10  274.41   15.13
   2  -8 -10  245.39    8.53
   2  -8  -9  510.79   13.03
  -2   8  -9  526.60   20.65
   2   8  -9  542.28   20.84
   2   8  -8  146.89   10.44
  -2   8  -8  143.76   10.43
   2  -8  -8  129.35    6.08
  -2   8  -7  811.53   24.62
   2  -8  -7  782.52   17.36
   2   8  -7  826.54   24.75
   2   8  -6   38.88    5.64
  -2   8  -6   34.94    5.37
   2  -8  -6   32.97    3.22
   2   8  -5 2064.00   41.28
  -2   8  -5 2029.14   41.20
   2  -8  -5 1937.87   33.64
   2  -8  -4   48.30    4.04
   2   8  -4   55.06    5.88
  -2   8  -4   53.36    5.92
   2   8  -3 4407.11   68.90
   2  -8  -3 4097.28   63.32
  -2   8  -3 4275.81   68.84
   2   8  -2  452.36   14.93
   2  -8  -2  425.62   12.99
  -2   8  -2  451.73   15.18
   2   8  -2  475.67   15.17
   2   8  -1 2245.92   40.33
   2  -8  -1 2174.30   38.83
  -2   8  -1 2255.03   40.75
   2   8   0  320.56   11.54
   2  -8   0  314.55   11.79
  -2   8   0  358.89   12.58
   2  -8   1 2194.64   40.40
  -2   8   1 2269.64   39.42
   2   8   1 2234.42   38.46
   2  -8   2  458.99   15.18
   2   8   2  465.59   13.01
  -2   8   2  475.71   13.85
  -2   8   3 4329.94   67.43
   2   8   3 4142.18   61.85
  -2   8   3 4223.68   63.41
   2  -8   3 4232.26   68.65
   2   8   4   53.37    3.94
  -2   8   4   54.56    4.46
  -2   8   4   47.65    5.27
   2  -8   4   51.79    5.56
  -2   8   5 2080.96   41.38
  -2   8   5 2034.24   34.60
   2   8   5 1987.89   32.20
   2  -8   5 2079.22   41.79
  -2   8   6   31.65    3.24
  -2   8   6   30.13    4.82
   2   8   6   32.70    2.57
   2  -8   6   42.22    5.28
  -2   8   7  868.79   18.17
   2   8   7  841.59   15.25
   2   8   7  855.99   24.77
  -2   8   7  911.28   26.18
   2   8   8  149.62    4.56
   2   8   8  152.64   10.16
   2   8   9  503.30    8.95
  -2   9 -16    7.42    5.61
   2   9 -15   28.40    6.75
  -2   9 -15   28.61    7.23
   2   9 -14   53.19    8.59
  -2   9 -14   65.32    9.46
  -2   9 -13   64.92    9.08
   2   9 -13   56.98    8.58
  -2   9 -12   87.89    9.83
   2   9 -12   84.82    9.53
   2  -9 -11   30.46    2.63
  -2   9 -11   42.27    6.87
   2   9 -11   30.97    6.34
   2   9 -10  264.71   15.24
  -2   9 -10  272.22   15.57
   2  -9 -10  254.61    7.94
   2  -9 -10  248.50    7.73
   2   9  -9   71.78    8.07
   2  -9  -9   68.05    4.11
  -2   9  -9   63.62    7.76
   2   9  -8  120.32    9.88
  -2   9  -8  119.03    9.74
   2  -9  -8  120.30    5.59
   2   9  -7   64.04    7.19
  -2   9  -7   61.99    7.10
   2  -9  -7   60.45    4.07
  -2   9  -6    8.53    3.82
   2  -9  -6   13.99    2.34
   2   9  -6   14.64    4.43
   2   9  -5   12.57    4.18
  -2   9  -5    4.30    3.18
   2  -9  -5    7.48    2.00
   2   9  -4  189.72   10.47
   2  -9  -4  175.06    7.58
  -2   9  -4  173.30   10.19
  -2   9  -3  442.76   16.13
   2  -9  -3  424.77   12.88
   2   9  -3  440.21   15.80
   2   9  -2  350.72   13.25
  -2   9  -2  324.86   13.09
   2  -9  -2  317.90   11.25
   2   9  -2  334.48   13.22
   2   9  -1  228.36   10.17
   2  -9  -1  226.74    9.71
  -2   9  -1  223.09   10.48
   2   9  -1  221.95   10.19
   2   9   0  608.25   16.91
   2  -9   0  570.51   16.81
   2   9   0  577.90   16.56
  -2   9   0  618.07   17.42
   2   9   1  218.86    9.16
   2  -9   1  209.73   10.13
  -2   9   1  215.73    9.58
   2  -9   2  350.18   13.52
   2   9   2  312.84   10.72
  -2   9   2  328.53   11.57
   2  -9   3  454.41   16.19
  -2   9   3  448.58   13.37
   2   9   3  443.41   12.46
   2   9   4  173.19    7.00
  -2   9   4  188.77    8.08
  -2   9   4  182.64   10.10
   2  -9   4  168.66   10.01
   2   9   5    4.16    1.61
  -2   9   5   11.54    2.48
  -2   9   5   10.41    3.53
   2  -9   5   11.16    3.42
   2   9   6   17.36    2.05
  -2   9   6   20.37    2.81
  -2   9   6   12.29    2.97
  -2   9   7   58.52    4.03
   2   9   7   65.82    2.96
   2   9   7   64.15    6.82
  -2  10 -16   40.73    8.35
  -2  10 -15  450.67   23.84
   2  10 -15  432.98   23.38
   2  10 -14   73.30   10.28
  -2  10 -14   83.52   10.72
  -2  10 -13  880.75   32.60
   2  10 -13  944.17   33.43
  -2  10 -12   47.07    7.79
   2  10 -12   44.64    8.11
   2  10 -11  521.50   23.01
  -2  10 -11  562.27   23.79
  -2  10 -10   28.91    6.01
   2 -10 -10   29.61    2.25
   2  10 -10   24.69    5.84
   2 -10  -9   53.02    3.36
  -2  10  -9   52.97    7.21
   2  10  -9   57.34    7.55
   2  10  -8   24.75    5.51
   2 -10  -8   11.66    1.93
  -2  10  -8    9.70    4.00
   2  10  -7  272.23   14.40
   2 -10  -7  267.46    8.70
  -2  10  -7  266.18   14.20
   2 -10  -6  242.32    8.63
  -2  10  -6  251.70   13.48
   2  10  -6  250.23   13.30
   2 -10  -5 3035.23   48.67
  -2  10  -5 3253.25   58.97
   2  10  -5 3172.74   58.28
  -2  10  -4  241.34   12.38
   2 -10  -4  214.81    8.79
   2  10  -4  235.85   12.17
   2 -10  -3 2700.98   45.71
  -2  10  -3 2810.82   52.01
   2  10  -3 2829.62   51.28
   2 -10  -2  192.64    8.84
   2  10  -2  197.28   10.32
  -2  10  -2  194.64   10.39
   2  10  -2  205.24   10.33
   2 -10  -1  368.89   13.05
   2  10  -1  398.61   14.31
  -2  10  -1  402.99   14.69
   2  10  -1  387.06   14.21
   2  10   0   41.78    4.68
   2  10   0   52.98    5.14
  -2  10   0   41.16    4.67
   2 -10   0   43.20    4.70
   2 -10   1  390.22   14.22
   2  10   1  373.11   12.69
  -2  10   1  371.74   13.19
   2  10   1  388.33   12.81
   2 -10   2  204.11   10.49
  -2  10   2  207.73    9.32
   2  10   2  198.30    8.64
   2  10   2  213.26    8.84
   2 -10   3 2915.58   52.36
   2  10   3 2760.69   44.88
  -2  10   3 2821.82   46.89
   2  10   3 2775.40   45.04
   2  10   4  244.59    8.62
  -2  10   4  254.77    9.72
  -2  10   4  239.29   12.11
   2  10   4  242.62    8.44
   2 -10   4  255.63   12.59
   2  10   5 3178.35   47.68
   2 -10   5 3199.32   59.51
  -2  10   5 3236.81   50.49
  -2  10   5 3314.56   59.61
   2  10   5 3171.98   47.34
   2  10   6  250.06    7.06
  -2  10   6  251.99    8.86
   2  10   6  255.96    7.23
  -2  10   7  262.39    8.68
   2  10   7  259.76    5.85
   2  10   7  261.33    5.83
  -2  11 -14  354.81   20.99
   2  11 -14  351.44   21.09
   2  11 -13   74.61   10.07
  -2  11 -13   70.08   10.17
   2  11 -12  697.33   28.31
  -2  11 -12  679.70   27.94
   2  11 -11  141.70   12.35
  -2  11 -11  132.66   12.04
   2  11 -10  473.07   21.97
  -2  11 -10  526.82   22.82
   2 -11  -9   78.81    3.65
  -2  11  -9   78.83    8.76
   2  11  -9   75.32    8.78
   2  11  -8  872.48   28.17
   2 -11  -8  837.02   16.60
  -2  11  -8  869.75   28.34
   2 -11  -7   15.95    2.24
   2  11  -7   28.94    5.87
  -2  11  -7   24.22    5.32
   2  11  -6  803.90   25.70
   2 -11  -6  774.14   17.43
  -2  11  -6  825.92   25.82
   2 -11  -5  126.39    6.51
  -2  11  -5  138.46   10.13
   2  11  -5  134.66    9.80
   2 -11  -4  940.49   21.27
  -2  11  -4  998.80   27.39
   2  11  -4  989.07   27.02
   2  11  -3   26.97    4.77
   2 -11  -3   22.68    3.38
  -2  11  -3   35.20    5.51
   2 -11  -2 1081.09   24.59
  -2  11  -2 1126.97   27.94
   2  11  -2 1063.46   26.98
   2 -11  -1  136.56    8.04
  -2  11  -1  152.42    9.16
   2  11  -1  129.38    8.27
   2  11  -1  145.73    8.65
   2  11   0  743.99   20.22
   2 -11   0  713.65   20.22
   2  11   0  749.44   20.05
  -2  11   0  742.69   20.68
   2 -11   1  139.33    8.77
   2  11   1  134.36    7.67
  -2  11   1  135.50    8.14
   2  11   1  143.15    8.04
   2 -11   2 1074.74   27.22
   2  11   2 1076.40   23.52
  -2  11   2 1068.31   24.60
   2  11   2 1048.54   23.52
   2  11   3   30.93    3.58
   2 -11   3   35.07    5.05
  -2  11   3   33.77    4.16
   2  11   3   28.64    3.42
   2  11   4  989.11   20.70
   2 -11   4  998.61   27.44
  -2  11   4 1020.14   22.38
   2  11   4  977.24   20.41
  -2  11   5  138.87    6.94
   2  11   5  129.76    5.82
   2  11   5  128.04    5.70
  -2  11   5  133.62    9.74
  -2  11   6  820.87   18.14
   2  11   6  786.82   14.92
   2  11   6  804.90   15.21
  -2  11   7   20.49    2.63
  -2  11   8  807.95   16.16
  -2  12 -13  147.12   13.39
   2  12 -13  123.27   12.65
  -2  12 -12   11.27    5.51
   2  12 -12    8.80    5.16
   2  12 -11   63.59    9.12
  -2  12 -11   68.86    9.15
  -2  12 -10   55.04    8.06
   2  12 -10   61.44    8.57
  -2  12  -9   53.58    7.98
   2  12  -9   48.87    7.77
   2 -12  -8   10.97    1.76
  -2  12  -8   12.71    5.04
   2  12  -8   10.04    4.94
   2 -12  -7   64.04    4.13
   2  12  -7   68.35    7.98
  -2  12  -7   72.23    8.39
   2 -12  -6   24.25    2.87
  -2  12  -6   17.28    5.08
   2  12  -6   22.48    5.42
   2 -12  -5  365.02   11.87
  -2  12  -5  425.50   17.83
   2  12  -5  422.93   17.69
   2 -12  -4  187.45    8.53
  -2  12  -4  190.62   11.60
   2  12  -4  196.08   11.73
   2 -12  -3  156.56    8.20
  -2  12  -3  157.42   10.35
   2  12  -3  162.07   10.13
   2  12  -2    1.07    2.92
   2 -12  -2    1.59    2.13
  -2  12  -2   -1.50    2.85
   2  12  -1    7.81    3.00
   2 -12  -1    9.40    3.24
   2  12  -1    4.25    2.36
  -2  12  -1    5.45    3.27
   2 -12   0   92.84    7.10
  -2  12   0  104.91    7.64
   2  12   0  102.34    7.21
   2  12   0   98.39    7.20
   2 -12   1    7.61    2.57
   2  12   1    6.95    2.70
   2  12   1    5.02    2.41
  -2  12   1    5.48    2.71
   2  12   2    1.24    1.99
   2 -12   2    2.91    3.06
   2  12   2   -1.82    2.07
  -2  12   2   -0.96    2.44
   2 -12   3  171.63   10.62
   2  12   3  165.78    7.88
  -2  12   3  177.79    8.81
   2  12   3  160.79    7.87
   2  12   4  182.08    7.87
  -2  12   4  196.10    8.88
   2  12   4  186.77    7.86
   2  12   5  397.95   11.10
  -2  12   5  409.86   12.74
   2  12   5  400.71   10.90
   2  12   6   26.52    2.48
   2  12   6   23.55    2.29
  -2  12   6   24.15    2.99
  -2  12   7   69.06    4.44
  -2  12   8   11.15    1.88
   2  13 -13   42.09    8.75
  -2  13 -13   32.49    6.85
   2  13 -12  774.98   31.32
  -2  13 -12  765.63   30.93
   2  13 -11    5.07    4.53
  -2  13 -11   19.42    6.11
  -2  13 -10  739.91   28.82
   2  13 -10  743.70   29.22
   2  13  -9   72.33    9.03
  -2  13  -9   82.13    9.70
   2  13  -8  339.17   18.09
  -2  13  -8  367.73   18.69
   2 -13  -7  161.41    6.59
  -2  13  -7  171.31   12.50
   2  13  -7  179.16   12.77
   2  13  -6 1423.23   37.29
   2 -13  -6 1358.38   26.34
  -2  13  -6 1469.79   37.91
   2  13  -5   95.94    9.32
   2 -13  -5  103.67    6.30
  -2  13  -5  106.23    9.42
   2  13  -4 2715.52   53.80
   2 -13  -4 2550.32   45.11
  -2  13  -4 2763.05   54.47
   2 -13  -3  190.89    9.34
  -2  13  -3  202.78   12.03
   2  13  -3  201.95   11.83
   2 -13  -2  586.73   17.85
  -2  13  -2  603.31   20.63
   2  13  -2  616.47   20.36
   2  13  -1   26.92    4.56
   2 -13  -1   24.66    3.97
   2  13  -1   30.40    4.44
  -2  13  -1   32.79    5.05
   2 -13   0  158.17    9.53
   2  13   0  150.51    9.11
  -2  13   0  158.19    9.57
   2  13   0  162.44    9.43
   2  13   1   31.30    4.39
   2 -13   1   20.52    3.99
  -2  13   1   28.26    4.39
   2  13   1   27.26    4.22
   2  13   2  621.18   17.71
  -2  13   2  634.87   18.72
   2  13   2  598.98   17.68
   2 -13   2  616.14   20.81
   2  13   3  217.11    9.50
  -2  13   3  222.31   10.26
   2  13   3  203.82    9.16
   2  13   4 2712.58   44.89
   2  13   4 2701.94   44.62
  -2  13   4 2783.02   47.20
   2  13   5  110.94    5.82
  -2  13   5  114.49    6.77
   2  13   5  103.90    5.51
   2  13   6 1305.51   22.70
  -2  13   6 1420.07   26.87
   2  13   6 1431.70   23.40
  -2  13   7  169.29    6.88
  -2  13   8  326.00    8.53
   2  14 -12    4.52    5.48
  -2  14 -12   20.54    6.62
   2  14 -11   44.38    8.05
  -2  14 -11   32.45    7.06
   2  14 -10   21.56    6.23
  -2  14 -10   10.02    5.18
   2  14  -9  126.42   11.95
  -2  14  -9  116.83   11.32
   2  14  -8   38.88    6.94
  -2  14  -8   31.29    6.62
   2  14  -7  478.28   21.40
  -2  14  -7  471.42   21.38
   2  14  -6  156.02   11.84
   2 -14  -6  148.08    7.10
  -2  14  -6  155.50   11.99
   2  14  -5  550.29   21.66
  -2  14  -5  560.85   22.01
   2 -14  -5  502.02   14.90
   2 -14  -4  141.29    7.89
  -2  14  -4  164.89   11.55
   2  14  -4  171.81   11.71
   2  14  -3  259.40   13.90
   2 -14  -3  218.77   10.36
  -2  14  -3  244.88   13.61
  -2  14  -2   63.96    7.12
   2 -14  -2   68.23    6.11
   2  14  -2   59.57    6.86
   2 -14  -1  160.49    9.46
   2  14  -1  136.60    9.22
  -2  14  -1  160.86   10.34
   2  14  -1  158.08    9.94
   2  14   0    0.68    2.50
   2 -14   0   -0.65    2.19
   2  14   0    2.85    2.63
  -2  14   0    0.88    2.67
   2  14   1  146.11    8.82
   2 -14   1  141.79    9.60
  -2  14   1  157.38    9.61
   2  14   1  147.93    8.82
   2  14   2   67.77    5.82
   2  14   2   53.85    5.36
  -2  14   2   63.51    6.14
   2  14   3  241.14   10.27
   2  14   3  227.61   10.11
  -2  14   3  222.30   10.61
   2  14   4  156.49    7.74
   2  14   4  147.28    7.49
  -2  14   4  161.35    8.62
  -2  14   5  555.55   15.97
   2  14   5  531.68   13.71
   2  14   5  542.44   14.02
   2  14   6  168.02    5.96
  -2  14   6  165.87    7.83
   2  14   6  158.12    5.91
  -2  14   7  478.11   12.47
  -2  15 -11   60.92    9.58
   2  15 -11   56.74    9.05
  -2  15 -10  250.32   17.25
   2  15 -10  249.05   17.46
   2  15  -9   42.54    7.78
  -2  15  -9   44.73    8.19
   2  15  -8  150.24   12.75
  -2  15  -8  135.23   12.15
   2  15  -7   13.99    5.10
  -2  15  -7    8.43    4.02
   2  15  -6  579.26   23.83
  -2  15  -6  619.35   24.58
   2  15  -5   30.07    6.13
   2 -15  -5   23.97    3.44
  -2  15  -5   25.03    5.71
   2 -15  -4  627.06   18.29
   2  15  -4  697.82   24.45
  -2  15  -4  698.66   24.73
   2  15  -3  140.70   10.61
   2 -15  -3  121.81    7.98
  -2  15  -3  147.59   10.87
   2  15  -2  408.61   17.30
  -2  15  -2  409.15   17.58
   2 -15  -2  378.39   14.86
   2  15  -1   42.75    5.84
   2 -15  -1   44.13    5.42
  -2  15  -1   41.01    6.04
   2  15   0    8.26    3.23
   2 -15   0    7.93    3.47
   2  15   0    5.14    3.02
  -2  15   0    7.54    3.37
   2  15   1   33.91    4.86
   2  15   1   39.94    5.27
  -2  15   1   34.60    5.13
   2  15   2  395.46   14.57
   2  15   2  375.21   14.43
  -2  15   2  389.44   15.32
   2  15   3  121.36    7.48
   2  15   3  126.07    7.78
  -2  15   3  137.09    8.54
   2  15   4  648.22   17.34
   2  15   4  662.75   17.72
  -2  15   4  677.25   19.26
  -2  15   5   21.20    3.66
   2  15   5   22.75    3.11
   2  15   5   22.55    3.02
   2  15   6  608.06   13.06
  -2  15   6  554.24   15.61
  -2  15   7   18.32    2.53
  -2  16 -10   19.34    5.78
   2  16 -10   12.12    5.88
   2  16  -9  294.45   18.54
  -2  16  -9  284.86   18.37
   2  16  -8   91.82   10.66
  -2  16  -8   90.64   10.78
  -2  16  -7  537.78   24.01
   2  16  -7  501.30   23.29
   2  16  -6  167.09   13.13
  -2  16  -6  164.14   12.89
  -2  16  -5 1351.67   38.23
   2  16  -5 1341.68   37.68
  -2  16  -4  125.46   10.77
   2 -16  -4  127.88    8.03
   2  16  -4  136.53   11.30
   2 -16  -3  829.65   23.15
  -2  16  -3  921.35   28.94
   2  16  -3  891.31   28.02
   2 -16  -2   87.59    7.43
  -2  16  -2   91.95    8.91
   2  16  -2   91.72    8.68
   2 -16  -1  641.74   21.10
  -2  16  -1  656.35   22.79
   2  16  -1  614.78   21.69
   2  16   0   20.96    4.40
   2  16   0   10.89    3.45
  -2  16   0    8.05    4.02
   2  16   1  618.67   20.01
   2  16   1  593.67   19.94
  -2  16   1  627.38   21.08
  -2  16   2   86.23    7.63
   2  16   2   86.61    7.15
   2  16   2   95.55    7.41
   2  16   3  871.10   22.60
  -2  16   3  905.37   24.34
   2  16   3  914.05   23.31
   2  16   4  125.63    7.39
   2  16   4  119.47    7.28
  -2  16   4   98.51    7.36
   2  16   5 1300.08   24.58
  -2  16   5 1005.23   25.14
  -2  16   6  164.65    8.14
   2  17  -9    9.19    5.42
  -2  17  -9    3.11    4.58
   2  17  -8   62.55    9.24
  -2  17  -8   69.75    9.47
   2  17  -7   68.31    8.95
  -2  17  -7   78.31    9.73
   2  17  -6   56.48    8.56
  -2  17  -6   65.39    8.83
   2  17  -5   52.06    7.69
  -2  17  -5   50.00    8.03
   2  17  -4    6.19    4.11
  -2  17  -4    4.50    4.36
   2 -17  -3   18.47    3.68
   2  17  -3   32.74    6.07
  -2  17  -3   33.69    6.40
   2 -17  -2  126.41    9.06
   2  17  -2  138.80   10.67
  -2  17  -2  124.64   10.44
   2  17  -1   30.45    5.69
  -2  17  -1   27.69    5.70
   2  17   0   75.94    7.62
  -2  17   0   76.18    7.84
   2  17   1   17.98    4.21
   2  17   1   29.49    4.98
  -2  17   1   28.46    5.43
   2  17   2  132.02    8.88
   2  17   2  126.66    8.79
  -2  17   2  134.80    9.33
   2  17   3   13.46    3.40
  -2  17   3   23.39    3.98
   2  17   3   15.40    3.45
  -2  17   4    3.89    2.70
   2  17   4    7.08    2.50
  -2  17   5   48.72    5.07
  -2  18  -9  253.07   18.14
   2  18  -9  244.12   17.66
   2  18  -8   95.22   10.95
  -2  18  -8   76.61   10.02
   2  18  -7  301.98   18.59
  -2  18  -7  304.43   19.12
   2  18  -6   33.05    7.12
  -2  18  -6   24.36    6.67
   2  18  -5  497.54   22.82
  -2  18  -5  451.23   22.14
   2  18  -4   10.06    4.66
  -2  18  -4   22.27    6.05
   2  18  -3 1111.25   33.41
  -2  18  -3 1057.24   33.29
   2  18  -2  118.51   10.18
  -2  18  -2  127.31   10.99
   2  18  -1  645.05   23.39
  -2  18  -1  696.55   24.71
   2  18   0  551.14   20.62
  -2  18   0  570.07   21.57
   2  18   1  629.26   21.44
  -2  18   1  668.08   22.92
  -2  18   2  126.98    9.69
   2  18   2  124.58    8.96
   2  18   3 1055.08   26.65
  -2  18   3 1083.16   28.32
  -2  18   4   11.36    3.69
   2  18   4   12.39    3.19
   2  19  -8  158.09   14.63
  -2  19  -8  200.85   16.45
   2  19  -7   30.59    6.97
  -2  19  -7   15.36    5.85
   2  19  -6  222.26   15.96
  -2  19  -6  224.21   16.43
   2  19  -5   30.33    6.49
  -2  19  -5   27.77    6.99
   2  19  -4  266.49   16.62
  -2  19  -4  275.01   16.98
   2  19  -3   58.87    8.33
  -2  19  -3   61.50    8.31
   2  19  -2  438.26   20.06
  -2  19  -2  482.06   21.37
   2  19  -1   80.07    8.41
  -2  19  -1   86.40    9.28
   2  19   0  446.09   18.92
  -2  19   0  466.41   19.89
   2  19   1   79.25    7.83
  -2  19   1   94.28    8.92
   2  19   2  456.79   17.60
  -2  19   2  445.36   18.38
   2  19   3   49.84    5.57
  -2  19   3   47.93    6.14
   2  20  -7   23.02    6.75
  -2  20  -7   22.54    6.63
   2  20  -6   15.16    5.89
  -2  20  -6   17.01    5.85
   2  20  -5  106.32   11.11
  -2  20  -5  127.34   12.74
   2  20  -4   20.14    5.73
  -2  20  -4   24.73    6.56
   2  20  -3  167.68   13.21
  -2  20  -3  158.78   12.99
   2  20  -2    6.88    4.23
  -2  20  -2    5.77    4.70
   2  20  -1   65.41    8.19
  -2  20  -1   95.49    9.70
   2  20   0    2.24    3.29
  -2  20   0    6.06    3.76
   2  20   1   80.67    7.95
  -2  20   1   72.27    7.92
   2  20   2    0.39    3.03
  -2  20   2    3.64    3.26
  -2  20   3  181.60   11.44
   2  21  -6  435.55   23.80
   2  21  -5   18.96    6.07
  -2  21  -5   20.83    6.32
   2  21  -4  607.63   26.61
  -2  21  -4  671.49   28.27
  -2  21  -3   49.98    8.41
   2  21  -3   46.75    8.08
   2  21  -2  574.04   24.42
  -2  21  -2  591.35   25.08
   2  21  -1   49.73    7.43
  -2  21  -1   36.44    6.81
   2  21   0  282.42   15.79
  -2  21   0  284.37   16.31
   2  21   1   43.88    6.44
  -2  21   1   51.97    7.38
  -2  21   2  617.27   22.76
   2  22  -5   18.19    5.94
   2  22  -4   18.93    6.00
  -2  22  -4   10.58    5.49
   2  22  -3   11.63    5.44
  -2  22  -3    7.47    5.43
   2  22  -2    3.58    4.37
  -2  22  -2   11.54    5.15
   2  22  -1  184.80   13.52
  -2  22  -1  157.98   13.02
   2  22   0   42.27    7.01
  -2  22   0   40.58    7.06
  -2  22   1  175.61   12.66
   2  23  -3   55.23    8.68
  -2  23  -3   43.73    8.49
   2  23  -2  204.72   15.04
  -2  23  -2  181.71   14.63
   2  23  -1   -4.71    5.15
  -2  23  -1    4.86    5.21
   3   0 -15    0.73    3.30
   3   0 -15   -2.49    4.60
  -3   0 -15   -1.00    3.17
   3   0 -14    5.87    3.45
   3   0 -14    7.82    5.61
  -3   0 -14    5.35    3.95
   3   0 -13    1.03    2.98
  -3   0 -13   -1.38    2.83
   3   0 -13   -0.62    4.81
   3   0 -12    2.39    3.15
   3   0 -12   -3.01    4.66
  -3   0 -12    2.04    2.61
   3   0 -11    1.56    2.86
   3   0 -11   -0.31    3.94
  -3   0 -11    1.86    2.71
   3   0 -10    3.28    2.83
  -3   0 -10    0.71    2.63
   3   0 -10    4.35    4.31
   3   0 -10    8.82    3.83
  -3   0  -9    1.04    2.32
   3   0  -9   -1.69    2.64
   3   0  -9    2.00    3.44
   3   0  -8    5.06    2.78
  -3   0  -8    4.98    2.88
  -3   0  -7    1.36    2.39
   3   0  -7   -0.68    2.33
  -3   0  -6   -1.29    2.25
   3   0  -6    3.64    2.88
  -3   0  -5   -0.49    2.51
   3   0  -5    2.29    2.60
  -3   0  -4   -0.25    2.58
   3   0  -4    3.15    2.84
  -3   0  -3    4.82    2.94
   3   0  -3    1.25    2.26
  -3   0  -2   -1.72    3.03
   3   0  -2    3.10    2.44
   3   0  -1    4.79    2.81
  -3   0  -1    0.14    3.06
   3   0   0    0.01    2.54
  -3   0   0   -1.83    2.92
   3   0   1    4.56    2.66
  -3   0   1    0.31    2.74
   3   0   2    3.84    2.70
  -3   0   2   -0.40    2.52
   3   0   3    9.71    3.14
  -3   0   3   -2.13    3.12
  -3   0   4    5.55    2.77
   3   0   4    1.22    2.41
  -3   0   5    2.46    2.83
   3   0   5   -0.46    2.01
   3   0   6    2.38    2.70
   3   0   7    0.94    2.14
   3   0   8   -0.45    2.68
   3   0   9   -1.38    2.43
   3   0  10    6.22    3.22
   3   0  11    2.27    2.86
   3   1 -16  512.76   22.58
   3  -1 -15  186.02   12.37
   3   1 -15  204.51   16.60
  -3   1 -15  173.69   12.96
   3  -1 -15  170.22   15.17
   3   1 -15  186.73   13.12
  -3   1 -15  186.63   12.67
   3  -1 -14  518.21   20.42
  -3   1 -14  521.63   21.49
   3  -1 -14  532.88   25.62
   3   1 -14  532.61   21.76
   3   1 -14  541.19   25.87
  -3   1 -14  574.01   22.11
  -3  -1 -14  574.11   20.80
   3  -1 -13  167.34   13.91
  -3   1 -13  146.27   10.76
   3   1 -13  142.11   10.76
  -3   1 -13  151.47   10.97
  -3  -1 -13  158.09   10.39
   3   1 -13  169.93   13.90
   3  -1 -13  153.33   10.60
   3  -1 -12  342.66   18.85
  -3   1 -12  362.00   16.37
   3  -1 -12  382.82   16.40
  -3  -1 -12  372.30   15.65
   3   1 -12  379.95   19.62
  -3   1 -12  377.03   16.32
   3   1 -12  370.76   16.91
   3  -1 -11   90.82    7.99
  -3   1 -11  103.92    8.57
   3  -1 -11   85.54    9.29
   3   1 -11  100.21   10.18
  -3  -1 -11   95.14    7.59
  -3   1 -11  101.08    8.05
   3  -1 -11   83.77    7.64
   3   1 -11   94.59    8.45
   3  -1 -10  996.88   26.68
   3  -1 -10  987.35   30.28
   3  -1 -10  995.54   27.20
  -3   1 -10  993.33   27.31
  -3  -1 -10 1017.56   26.12
   3   1 -10 1011.68   27.83
  -3   1 -10 1032.60   25.74
  -3  -1  -9   36.12    4.67
   3   1  -9   28.87    5.07
   3  -1  -9   24.74    5.29
  -3   1  -9   38.81    4.46
  -3   1  -9   36.82    5.07
   3  -1  -9   32.93    4.62
   3  -1  -8 1596.60   34.67
   3   1  -8 1591.29   35.60
  -3   1  -8 1581.66   34.61
  -3  -1  -8 1582.39   33.31
   3  -1  -8 1530.25   36.47
  -3   1  -8 1583.80   30.70
  -3   1  -7   98.54    5.55
   3  -1  -7   97.85    7.29
   3   1  -7  102.09    7.82
  -3   1  -7   94.79    7.26
   3  -1  -7   89.33    7.60
  -3  -1  -7   88.12    6.61
   3  -1  -6 1939.00   38.10
   3   1  -6 2017.14   39.36
   3  -1  -6 1875.44   38.29
  -3   1  -6 1920.13   37.98
  -3  -1  -6 1898.15   36.86
   3  -1  -5 1439.96   30.95
   3   1  -5 1465.86   31.58
   3  -1  -5 1488.10   30.73
  -3  -1  -5 1465.07   30.12
  -3   1  -5 1475.02   31.20
  -3  -1  -4 1328.12   28.18
   3  -1  -4 1333.21   28.83
   3   1  -4 1365.36   29.60
   3  -1  -4 1331.42   27.30
  -3   1  -4 1352.57   29.00
  -3  -1  -3 1119.04   24.74
   3  -1  -3 1151.22   25.55
   3   1  -3 1088.67   25.54
  -3   1  -3 1115.11   25.30
  -3  -1  -2 3356.78   54.54
   3   1  -2 3417.77   55.43
   3  -1  -2 3332.69   55.07
  -3   1  -2 3360.23   55.31
   3  -1  -1  255.13   10.48
  -3   1  -1  258.07   10.72
   3   1  -1  258.78   10.53
  -3  -1  -1  262.95   10.51
   3  -1  -1  251.28    7.34
   3   1   0 3328.62   52.84
  -3   1   0 3294.24   53.08
  -3  -1   0 3154.29   52.53
   3  -1   0 3131.22   43.72
   3  -1   0 3311.61   52.86
  -3   1   1  247.86   10.44
  -3  -1   1  249.60   10.46
   3  -1   1  250.06   10.27
   3   1   1  246.08   10.08
  -3   1   2 3446.94   55.14
   3  -1   2 3322.56   54.86
  -3  -1   2 3317.69   55.22
   3   1   2 3372.42   54.48
   3  -1   3 1097.33   24.55
   3   1   3 1069.27   17.67
  -3   1   3 1090.79   24.66
   3   1   3 1056.90   23.81
  -3  -1   3 1127.53   25.16
   3  -1   4 1347.60   28.56
  -3  -1   4 1326.53   28.69
   3   1   4 1324.95   27.53
  -3   1   4 1320.92   28.35
   3   1   4 1286.31   21.66
  -3   1   5 1462.00   30.52
  -3  -1   5 1402.19   30.85
   3  -1   5 1474.36   30.97
   3   1   5 1445.62   29.69
  -3   1   6 1861.49   36.66
   3  -1   6 1870.66   36.88
   3   1   6 1827.07   35.67
   3  -1   7   76.48    6.41
   3   1   7   79.90    6.14
   3   1   8 1488.69   31.77
   3  -1   8 1502.69   33.16
   3  -1   9   32.55    4.94
   3   1   9   22.33    3.88
   3   1  10 1035.13   26.32
   3  -1  10 1031.75   27.51
   3   1  11   87.80    7.37
   3   1  12  355.15   15.01
   3   2 -16   39.53    7.10
  -3   2 -16   57.39    8.53
  -3   2 -16   37.59    6.87
   3   2 -15  282.16   16.67
   3  -2 -15  307.43   15.41
  -3   2 -15  276.75   16.30
   3  -2 -15  281.63   19.25
  -3   2 -15  314.03   17.00
   3   2 -15  326.17   20.86
   3  -2 -14  213.65   12.62
   3  -2 -14  205.65   15.95
  -3   2 -14  249.90   14.83
  -3   2 -14  206.42   13.42
  -3  -2 -14  231.86   12.45
   3   2 -14  217.31   16.68
   3   2 -14  226.73   14.40
   3  -2 -13  348.45   19.88
  -3   2 -13  324.49   16.46
  -3   2 -13  326.79   15.90
   3   2 -13  357.08   19.97
  -3  -2 -13  354.46   15.12
   3   2 -13  336.08   16.88
   3  -2 -13  328.58   15.23
  -3   2 -12   30.36    5.05
   3  -2 -12   22.40    5.75
   3   2 -12   23.16    6.55
   3  -2 -12   25.75    4.34
   3   2 -12   36.59    5.84
  -3  -2 -12   41.40    5.44
  -3   2 -12   41.18    6.17
   3  -2 -11  287.29   16.38
   3  -2 -11  272.59   13.40
  -3   2 -11  289.44   13.32
  -3   2 -11  320.92   15.18
   3   2 -11  270.83   14.28
  -3  -2 -11  293.40   13.05
   3  -2 -11  301.92   13.74
   3   2 -10   14.42    4.46
  -3  -2 -10    4.86    2.33
  -3   2 -10    8.50    3.16
  -3   2 -10    9.26    3.66
   3  -2 -10    7.53    3.38
   3  -2 -10   16.25    5.32
   3  -2  -9  496.77   19.71
  -3   2  -9  502.62   15.77
   3  -2  -9  509.49   17.72
  -3   2  -9  499.61   18.36
   3   2  -9  492.55   18.73
  -3  -2  -9  513.81   16.74
   3   2  -9  505.41   18.54
   3  -2  -8  199.27   11.56
   3  -2  -8  195.91   10.40
  -3   2  -8  186.86    8.51
  -3   2  -8  197.92   10.95
   3   2  -8  216.05   11.77
  -3  -2  -8  197.92    9.81
   3  -2  -7 1262.63   30.76
   3  -2  -7 1283.64   29.23
  -3   2  -7 1253.28   24.60
  -3   2  -7 1304.30   30.37
   3   2  -7 1321.52   31.21
  -3  -2  -7 1266.02   27.88
   3  -2  -6  938.76   23.68
  -3   2  -6  982.22   18.79
   3  -2  -6  917.10   24.33
   3   2  -6  956.08   25.01
  -3  -2  -6  968.66   22.88
  -3   2  -6  961.65   24.56
  -3  -2  -5  741.48   19.23
   3  -2  -5  719.88   19.88
   3   2  -5  751.92   21.07
  -3   2  -5  733.19   14.03
  -3   2  -5  765.76   20.74
   3  -2  -5  749.62   19.98
   3  -2  -4  806.59   19.82
  -3  -2  -4  825.40   20.34
   3  -2  -4  826.39   21.15
   3   2  -4  870.98   22.50
  -3   2  -4  835.00   21.66
   3  -2  -3 1072.80   22.31
  -3  -2  -3 1111.36   24.26
   3  -2  -3 1096.00   24.88
   3   2  -3 1120.02   25.80
  -3   2  -3 1125.99   25.63
   3  -2  -2   96.87    6.46
   3  -2  -2  100.84    5.23
  -3  -2  -2  106.55    6.83
   3   2  -2   97.28    6.95
  -3   2  -2  114.48    7.33
  -3   2  -1 1363.15   28.53
   3   2  -1 1391.29   28.48
   3  -2  -1 1369.21   28.16
   3  -2  -1 1320.95   22.47
  -3  -2  -1 1363.44   27.88
  -3   2   0   95.49    6.70
   3   2   0   93.44    6.56
  -3  -2   0   95.43    6.68
   3  -2   0   96.96    6.54
   3   2   1 1289.61   26.91
  -3   2   1 1298.52   27.46
  -3  -2   1 1280.18   27.30
   3  -2   1 1282.07   27.58
  -3   2   2   90.90    6.64
   3  -2   2  103.49    6.95
  -3  -2   2  107.47    7.12
   3   2   2   90.55    6.12
  -3  -2   3 1137.35   25.83
   3  -2   3 1093.30   25.37
   3   2   3 1118.06   24.40
  -3   2   3 1155.65   25.26
  -3  -2   4  855.64   21.96
   3  -2   4  880.81   21.93
   3   2   4  840.12   16.71
   3   2   4  843.43   20.40
  -3   2   4  839.72   21.17
   3  -2   5  742.69   20.29
   3   2   5  734.56   18.81
   3   2   5  733.73   16.11
  -3   2   5  710.54   19.38
  -3   2   6  946.62   23.16
   3  -2   6  947.40   24.06
   3   2   6  900.36   21.90
   3   2   6  928.25   19.96
   3  -2   7 1272.01   29.36
   3   2   7 1205.91   26.83
   3  -2   8  193.58   10.78
   3   2   8  181.78    9.20
   3  -2   9  484.93   17.75
   3   2   9  477.49   15.91
   3  -2  10    6.50    2.68
   3   2  10   14.58    3.61
   3   2  11  298.54   12.86
   3   2  12   42.63    5.16
   3   3 -17   10.80    5.93
   3   3 -16   68.74    8.91
  -3   3 -16   74.43    9.23
  -3   3 -16   66.06    8.43
   3  -3 -15   13.58    6.24
  -3   3 -15   10.95    4.98
   3   3 -15   10.86    6.74
  -3   3 -15    7.06    4.70
   3   3 -15   10.49    4.46
   3   3 -14   83.54    9.35
   3   3 -14   91.05   11.28
  -3   3 -14   74.20    8.51
   3  -3 -14   61.74    9.74
  -3   3 -14   75.01    8.57
   3  -3 -14   76.11    7.40
   3   3 -13   88.52    9.11
  -3   3 -13   81.42    8.02
   3  -3 -13  109.17   11.53
  -3   3 -13   78.83    8.50
  -3  -3 -13   94.96    7.62
   3  -3 -13   98.34    8.03
   3   3 -12  153.10   11.34
  -3   3 -12  154.88   10.30
   3  -3 -12  156.06   10.33
   3  -3 -12  162.82   13.04
  -3   3 -12  160.10   11.29
  -3  -3 -12  158.80    9.55
   3  -3 -12  160.71    9.97
   3  -3 -11  284.81   13.04
  -3   3 -11  301.49   13.64
   3   3 -11  310.49   15.72
   3  -3 -11  287.95   16.53
   3  -3 -11  291.55   13.58
  -3   3 -11  305.46   15.20
  -3  -3 -11  310.94   12.96
  -3  -3 -10  227.84   10.77
  -3   3 -10  235.19   11.22
   3  -3 -10  230.92   14.09
   3  -3 -10  226.95   11.59
   3   3 -10  232.35   13.07
  -3   3 -10  229.38   12.89
   3   3  -9    4.85    3.63
  -3  -3  -9   10.45    3.17
   3  -3  -9    5.46    3.80
  -3   3  -9    5.22    2.46
   3  -3  -9    9.95    3.55
  -3   3  -9    3.74    3.75
   3  -3  -8  506.24   19.07
  -3   3  -8  505.63   14.66
   3  -3  -8  507.59   16.76
  -3   3  -8  481.84   17.91
   3   3  -8  518.14   18.83
  -3  -3  -8  485.09   15.51
  -3  -3  -7  266.86   10.91
  -3   3  -7  261.58    9.24
   3  -3  -7  249.39   12.59
   3  -3  -7  241.27   11.18
  -3   3  -7  263.84   12.56
   3   3  -7  262.02   12.75
  -3  -3  -6  459.28   14.50
   3  -3  -6  476.17   15.53
   3  -3  -6  470.55   16.42
  -3   3  -6  470.43   16.67
   3   3  -6  498.11   17.40
  -3   3  -6  464.41   11.65
  -3   3  -5   56.31    3.24
   3  -3  -5   58.61    5.27
  -3  -3  -5   54.60    4.90
   3   3  -5   57.52    5.82
   3  -3  -5   55.03    5.40
  -3   3  -5   58.76    5.99
   3  -3  -4  170.93    8.70
   3  -3  -4  156.33    8.01
  -3  -3  -4  176.33    8.50
  -3   3  -4  167.81    4.54
   3   3  -4  173.95    9.37
  -3   3  -4  174.67    9.50
  -3  -3  -3  245.52   10.11
   3  -3  -3  263.88   10.68
   3  -3  -3  246.64    9.33
   3   3  -3  238.10   10.86
  -3   3  -3  241.13   10.83
  -3  -3  -2  349.03   12.15
   3   3  -2  388.33   13.56
   3  -3  -2  342.89   12.39
   3  -3  -2  349.47   10.28
  -3   3  -2  348.19   12.97
   3   3  -1 1536.60   30.98
  -3  -3  -1 1490.62   29.83
  -3   3  -1 1516.89   31.02
   3  -3  -1 1474.75   30.32
  -3   3   0 2032.07   37.38
   3   3   0 2034.11   37.07
  -3  -3   0 1964.65   36.63
   3  -3   0 1935.37   36.91
   3   3   1 1514.32   30.58
  -3   3   1 1596.32   31.34
   3  -3   1 1550.08   31.57
  -3  -3   1 1518.71   30.99
  -3  -3   2  337.66   12.74
  -3   3   2  324.13   12.11
   3  -3   2  339.68   12.60
   3   3   2  328.44   11.83
  -3  -3   3  236.04   10.93
  -3   3   3  245.39   10.46
   3  -3   3  244.00   10.88
   3   3   3  254.92   10.14
   3  -3   4  161.66    8.91
  -3   3   4  156.56    8.34
   3   3   4  157.04    7.92
   3  -3   5   71.20    6.12
   3   3   5   55.81    4.28
   3   3   5   64.39    5.18
  -3   3   5   68.37    5.64
   3  -3   6  471.30   16.41
   3   3   6  425.46   13.76
  -3   3   6  457.33   15.01
   3   3   6  452.59   13.42
   3  -3   7  239.52   11.87
  -3   3   7  280.82   11.63
   3   3   7  251.64   10.39
   3   3   7  261.08   10.43
   3  -3   8  469.01   17.29
   3   3   8  485.81   15.11
   3  -3   9    3.41    2.67
   3   3   9    6.02    2.58
   3   3  10  219.03   10.35
   3   3  11  273.65   11.88
   3   3  12  149.42    8.93
   3   4 -17  383.22   21.17
  -3   4 -16   18.92    6.28
  -3   4 -16   25.75    6.53
   3   4 -16   18.16    6.21
   3   4 -15  450.48   22.08
  -3   4 -15  449.19   20.65
  -3   4 -15  471.44   22.28
   3   4 -15  457.03   24.63
   3  -4 -15  484.50   25.62
   3  -4 -14   94.26    7.83
   3   4 -14   88.19    9.95
  -3   4 -14   82.44    8.52
   3  -4 -14   74.73    9.94
  -3   4 -14   86.88    9.53
  -3   4 -13  458.47   19.15
  -3   4 -13  503.91   21.54
   3  -4 -13  469.75   23.46
   3   4 -13  475.30   21.21
   3  -4 -13  502.41   18.02
  -3  -4 -13  499.86   16.85
  -3   4 -12  391.17   16.53
   3  -4 -12  389.82   15.86
  -3   4 -12  400.47   18.65
   3  -4 -12  399.75   15.63
   3  -4 -12  439.81   21.35
   3   4 -12  365.38   18.04
  -3  -4 -12  426.94   15.11
  -3   4 -11  868.02   24.43
   3  -4 -11  829.60   23.70
   3  -4 -11  877.52   23.71
  -3   4 -11  876.69   27.53
  -3  -4 -11  875.46   22.58
   3  -4 -11  833.66   29.16
   3   4 -11  858.67   27.59
   3  -4 -10  333.37   13.87
   3  -4 -10  320.54   16.71
  -3   4 -10  349.70   16.36
  -3  -4 -10  369.79   13.37
   3   4 -10  358.21   16.62
  -3   4 -10  348.14   13.85
   3  -4  -9 1258.49   29.58
   3  -4  -9 1281.18   34.29
   3   4  -9 1305.44   33.41
  -3   4  -9 1323.62   33.47
  -3  -4  -9 1337.59   28.40
  -3   4  -9 1332.04   28.61
  -3  -4  -8  162.17    8.35
   3  -4  -8  151.23    8.78
   3  -4  -8  143.97   10.20
  -3   4  -8  168.55   10.60
  -3   4  -8  164.77    8.04
   3   4  -8  153.31   10.21
  -3  -4  -7 1481.96   29.86
   3  -4  -7 1449.79   31.34
   3  -4  -7 1490.72   34.45
  -3   4  -7 1492.59   34.49
  -3   4  -7 1510.65   27.87
   3   4  -7 1515.85   35.15
   3  -4  -6  738.47   20.05
  -3  -4  -6  752.26   19.01
   3  -4  -6  723.01   21.34
  -3   4  -6  785.11   22.60
   3   4  -6  792.95   23.14
   3  -4  -5 2293.56   41.66
  -3  -4  -5 2212.58   39.83
  -3   4  -5 2291.13   44.32
   3  -4  -5 2300.24   42.52
   3   4  -5 2346.59   44.73
  -3  -4  -4 1220.05   25.97
  -3   4  -4 1274.55   29.19
   3   4  -4 1314.10   29.61
   3  -4  -4 1263.17   26.99
   3  -4  -4 1269.88   27.26
   3  -4  -3 1634.09   30.81
  -3  -4  -3 1619.40   31.60
   3   4  -3 1751.79   34.92
  -3   4  -3 1690.68   34.46
   3  -4  -3 1702.95   32.98
   3   4  -2  794.05   20.99
  -3  -4  -2  792.28   19.48
  -3   4  -2  791.08   20.92
   3  -4  -2  794.15   20.14
  -3   4  -1 1837.96   26.82
   3   4  -1 1943.81   36.37
  -3  -4  -1 1840.68   34.81
   3  -4  -1 1829.09   35.50
  -3   4  -1 1935.71   36.62
   3   4   0  193.69    9.32
   3  -4   0  199.45    9.52
  -3   4   0  203.80    9.70
  -3   4   0  191.47    5.96
  -3  -4   0  196.08    9.43
  -3  -4   1 1897.66   36.12
  -3   4   1 1887.71   36.04
   3   4   1 1872.61   35.62
   3  -4   1 1903.80   36.48
  -3   4   1 1901.09   30.54
  -3  -4   2  766.55   20.52
   3  -4   2  780.55   20.61
   3   4   2  769.40   19.43
  -3   4   2  791.26   20.10
  -3   4   3 1618.71   32.46
   3  -4   3 1634.41   34.11
  -3  -4   3 1699.85   34.16
   3   4   3 1647.27   31.50
   3  -4   4 1311.13   29.20
  -3   4   4 1247.84   27.03
   3   4   4 1237.73   26.07
   3  -4   5 2237.94   43.16
   3   4   5 2184.88   38.01
   3   4   5 2172.51   38.87
  -3   4   5 2226.02   40.35
   3  -4   6  741.10   21.81
   3   4   6  762.05   19.01
   3   4   6  734.68   18.65
  -3   4   6  762.53   19.95
   3   4   7 1513.01   30.93
  -3   4   7 1486.95   31.03
   3  -4   7 1556.40   34.86
   3   4   7 1425.03   29.32
   3  -4   8  170.74   10.45
   3   4   8  165.97    8.33
   3   4   8  173.60    9.32
   3   4   9 1262.51   27.16
   3   4  10  338.69   12.60
   3   4  11  820.92   21.35
   3   5 -17   28.66    7.97
  -3   5 -17   38.59    8.00
   3   5 -16   47.08    8.03
  -3   5 -16   58.19    8.19
  -3   5 -16   48.49    8.48
   3   5 -15   57.20    8.54
  -3   5 -15   56.65    7.79
  -3   5 -15   74.39    9.53
   3  -5 -15   75.05   10.73
   3   5 -14   35.85    6.77
  -3   5 -14   28.99    5.98
   3  -5 -14   31.24    7.32
  -3   5 -14   31.76    6.05
   3  -5 -13   33.65    4.67
   3   5 -13   23.76    5.63
   3  -5 -13   25.50    6.65
  -3   5 -13   24.91    6.33
  -3   5 -13   28.54    5.27
   3  -5 -12    8.71    4.53
   3   5 -12   14.00    5.09
  -3  -5 -12   10.40    2.90
   3  -5 -12   16.61    3.65
  -3   5 -12   11.90    3.94
  -3   5 -12   13.45    4.44
   3   5 -11   -3.84    3.65
  -3  -5 -11    3.42    2.12
   3  -5 -11    6.70    2.88
  -3   5 -11    4.01    3.27
  -3   5 -11   11.81    4.52
   3  -5 -11    6.55    4.80
   3  -5 -11    8.05    2.85
  -3  -5 -10  114.15    7.08
   3  -5 -10  107.48    7.76
   3   5 -10  116.29    9.84
  -3   5 -10  118.01    9.65
  -3   5 -10  136.06    8.69
   3  -5 -10  115.11   10.11
   3   5  -9   49.54    6.86
  -3  -5  -9   52.29    4.80
  -3   5  -9   46.13    4.86
   3  -5  -9   37.02    4.67
   3  -5  -9   54.90    6.88
  -3   5  -9   59.43    7.35
   3  -5  -8   24.80    4.85
   3  -5  -8   32.31    4.36
  -3  -5  -8   34.85    3.95
   3   5  -8   22.69    4.57
  -3   5  -8   27.30    5.06
   3  -5  -7   70.46    5.81
  -3  -5  -7   74.32    5.50
   3  -5  -7   68.21    6.94
  -3   5  -7   70.34    7.10
   3   5  -7   84.00    7.69
  -3  -5  -6  211.15    9.06
  -3   5  -6  218.51   11.71
   3   5  -6  218.93   11.73
   3  -5  -6  202.15   10.89
   3  -5  -6  195.30    9.59
   3  -5  -5  161.37    9.02
   3  -5  -5  136.05    7.88
  -3  -5  -5  144.40    7.55
  -3   5  -5  147.02    9.37
   3   5  -5  161.32    9.74
  -3  -5  -4   91.32    5.97
  -3   5  -4  103.27    7.75
   3   5  -4  101.31    7.64
   3  -5  -4   87.45    6.34
   3  -5  -3   22.16    3.69
  -3  -5  -3   16.22    3.11
   3   5  -3   16.45    3.46
  -3   5  -3   22.54    4.14
   3   5  -2  415.98   14.66
   3  -5  -2  386.04   13.45
  -3  -5  -2  385.98   12.92
  -3   5  -2  415.48   14.67
  -3   5  -1   40.88    4.96
  -3  -5  -1   30.04    4.25
   3   5  -1   31.68    4.16
   3  -5  -1   28.50    4.20
  -3  -5   0  130.99    7.67
  -3   5   0  137.41    5.44
   3   5   0  127.00    7.57
  -3   5   0  140.16    8.21
   3  -5   0  131.30    7.77
  -3   5   1   34.69    4.69
  -3  -5   1   27.15    4.30
   3   5   1   26.42    4.09
   3  -5   1   26.61    4.10
  -3   5   1   26.97    2.90
   3   5   2  435.57   13.78
   3  -5   2  422.85   14.87
  -3  -5   2  423.99   14.71
  -3   5   2  419.07   14.14
  -3   5   2  434.80   12.36
   3   5   3   14.78    3.10
  -3   5   3   24.31    3.44
  -3   5   3   21.20    3.81
   3  -5   3   22.19    3.88
   3  -5   4  102.61    7.55
  -3   5   4  102.28    6.89
   3   5   4   97.40    6.26
   3  -5   5  157.98    9.54
  -3   5   5  141.77    7.96
   3   5   5  141.22    7.33
   3  -5   6  220.31   11.42
   3   5   6  194.60    8.63
   3   5   6  203.63    9.54
  -3   5   6  206.87    9.72
  -3   5   7   73.02    6.04
   3  -5   7   88.98    7.79
   3   5   7   69.13    6.02
   3   5   7   76.03    5.41
   3   5   8   29.46    3.65
   3   5   8   29.09    4.42
   3   5   9   43.14    5.49
   3   5   9   39.05    4.27
   3   5  10  106.19    6.62
   3   5  11    5.66    2.38
   3   6 -16   34.69    7.63
  -3   6 -16   10.11    4.94
  -3   6 -15  252.61   15.60
   3   6 -15  224.19   16.04
  -3   6 -15  239.92   16.46
   3   6 -14    9.23    5.32
  -3   6 -14   17.55    5.57
  -3   6 -14   12.54    4.56
   3  -6 -13  162.93   14.39
  -3   6 -13  156.40   12.58
   3   6 -13  139.20   12.07
  -3   6 -13  162.76   11.38
  -3  -6 -12  379.90   12.84
  -3   6 -12  366.95   18.54
   3  -6 -12  394.67   14.62
  -3   6 -12  389.82   16.70
   3  -6 -12  368.09   19.98
   3   6 -12  384.14   19.22
   3  -6 -11  461.57   16.19
   3  -6 -11  471.87   21.89
  -3  -6 -11  473.00   14.40
  -3   6 -11  480.19   20.85
   3   6 -11  505.91   21.40
  -3   6 -11  484.75   17.80
   3  -6 -11  516.51   16.51
   3  -6 -10  334.44   13.28
   3  -6 -10  352.07   17.74
  -3  -6 -10  329.51   11.68
  -3   6 -10  345.42   17.19
   3   6 -10  374.07   17.95
   3  -6  -9 1205.23   33.73
   3  -6  -9 1193.02   27.78
  -3  -6  -9 1246.54   25.71
   3   6  -9 1252.62   33.81
  -3   6  -9 1283.69   33.74
  -3  -6  -8  271.55   10.28
  -3   6  -8  261.22   13.90
   3  -6  -8  265.85   11.32
   3   6  -8  289.81   14.57
  -3  -6  -7 1139.52   24.27
   3  -6  -7 1141.49   26.15
  -3   6  -7 1195.24   30.93
   3   6  -7 1190.64   30.94
   3   6  -6  281.47   13.61
  -3  -6  -6  277.73   10.31
  -3   6  -6  288.61   13.66
   3  -6  -6  272.57   11.20
  -3  -6  -5  373.41   12.30
  -3   6  -5  406.49   16.04
   3  -6  -5  398.39   13.64
   3   6  -5  404.77   15.92
  -3   6  -4  275.77   12.74
  -3  -6  -4  258.52   10.08
   3  -6  -4  254.92   10.73
   3   6  -4  265.63   12.49
  -3   6  -3 1130.27   27.66
   3  -6  -3 1082.86   25.10
   3   6  -3 1175.20   27.83
  -3  -6  -3 1132.94   24.36
  -3  -6  -2  827.27   20.34
   3  -6  -2  839.75   21.30
   3   6  -2  875.31   22.80
  -3   6  -2  862.70   22.87
  -3  -6  -1 2019.17   37.87
   3  -6  -1 2009.34   38.51
   3   6  -1 2102.02   39.51
  -3   6  -1 2079.79   39.90
  -3  -6   0  469.03   15.30
   3   6   0  509.94   15.86
   3  -6   0  485.05   15.83
  -3   6   0  513.26   16.39
  -3   6   0  531.10   12.63
   3   6   1 2070.43   38.49
  -3   6   1 2113.69   39.55
  -3   6   1 2049.22   34.80
   3  -6   1 2117.26   40.17
  -3  -6   1 2083.34   39.40
  -3   6   2  822.46   19.13
   3   6   2  852.16   20.76
  -3   6   2  846.17   21.42
   3  -6   2  846.10   22.50
   3   6   3 1139.15   24.83
  -3   6   3 1147.49   25.88
   3  -6   3 1190.66   28.16
  -3   6   3 1145.47   25.01
   3  -6   4  257.50   12.21
  -3   6   4  229.58   10.25
  -3   6   4  249.41   10.84
   3   6   4  236.81    9.69
   3  -6   5  394.93   15.45
  -3   6   5  370.85   13.04
   3   6   5  345.66   11.81
   3  -6   6  291.00   13.62
   3   6   6  296.52   12.12
   3   6   6  280.05   10.31
  -3   6   6  277.54   11.32
  -3   6   7 1119.50   25.27
   3   6   7 1105.44   23.46
   3   6   7 1105.46   27.02
   3   6   8  266.44   12.57
  -3   6   8  267.08   11.18
   3   6   8  253.81    9.81
   3   6   9 1203.70   25.12
   3   6   9 1240.85   30.96
   3   6  10  333.80   11.49
   3   6  11  444.59   13.58
   3   7 -16  216.31   16.53
  -3   7 -16  188.76   15.56
   3   7 -15   26.98    6.51
  -3   7 -15   17.40    6.42
  -3   7 -15   21.15    5.87
  -3   7 -14  201.12   13.36
   3   7 -14  170.48   14.08
  -3   7 -14  165.40   13.98
   3   7 -13  240.56   16.17
  -3   7 -13  238.33   15.89
  -3   7 -13  246.28   14.05
   3   7 -12  427.69   20.93
  -3   7 -12  437.66   20.79
  -3   7 -12  405.89   17.39
   3  -7 -12  438.46   14.95
  -3  -7 -11  782.43   18.31
  -3   7 -11  784.75   27.76
   3   7 -11  780.03   27.71
  -3  -7 -10  859.01   19.29
  -3   7 -10  809.96   27.70
   3  -7 -10  808.58   21.51
   3   7 -10  819.60   27.76
  -3  -7  -9  233.72    9.05
  -3   7  -9  206.23   13.06
   3  -7  -9  214.07   10.08
   3   7  -9  235.32   13.94
   3   7  -8  997.13   29.09
  -3   7  -8  971.58   28.66
  -3  -7  -8  960.00   21.05
   3  -7  -8  918.33   22.97
   3   7  -7   36.66    5.86
  -3  -7  -7   33.96    3.70
  -3   7  -7   39.15    5.95
   3  -7  -7   33.69    4.21
  -3   7  -6  811.12   24.66
  -3  -7  -6  809.61   19.00
   3  -7  -6  787.94   20.53
   3   7  -6  830.52   24.73
  -3  -7  -5   19.94    3.09
   3   7  -5   20.55    3.89
  -3   7  -5   21.18    4.58
   3  -7  -5   18.72    3.29
   3   7  -4  773.28   22.70
  -3  -7  -4  749.48   18.60
  -3   7  -4  743.16   22.35
   3  -7  -4  756.78   19.84
  -3  -7  -3  289.68   11.01
   3  -7  -3  296.90   11.79
  -3   7  -3  317.10   13.78
   3   7  -3  311.97   13.46
  -3  -7  -2 1858.13   34.99
   3  -7  -2 1787.15   35.72
  -3   7  -2 1843.39   38.07
   3   7  -2 1928.02   38.23
  -3  -7  -1  574.94   16.83
   3  -7  -1  580.69   17.63
   3   7  -1  621.03   18.57
  -3   7  -1  616.69   18.70
   3  -7   0 3082.38   53.68
   3   7   0 3122.52   53.16
  -3   7   0 3121.70   54.03
   3   7   1  577.93   17.10
   3  -7   1  574.82   17.95
  -3   7   1  575.97   15.03
  -3   7   1  568.32   17.51
  -3   7   2 1877.59   36.83
   3   7   2 1816.81   35.32
   3  -7   2 1927.49   38.62
  -3   7   2 1927.34   34.91
   3   7   3  277.59   10.93
  -3   7   3  286.36   11.67
  -3   7   3  272.51   11.14
   3  -7   3  300.99   13.12
  -3   7   4  755.44   19.89
   3  -7   4  752.69   22.43
  -3   7   4  752.33   20.68
   3   7   4  738.95   18.60
  -3   7   5   19.45    3.99
   3  -7   5   12.42    3.70
   3   7   5   12.95    2.73
  -3   7   5   14.10    3.09
  -3   7   6  778.45   20.19
   3   7   6  767.59   18.57
  -3   7   6  807.29   23.38
   3   7   7   36.22    4.84
  -3   7   7   41.48    4.60
   3   7   7   40.24    4.00
  -3   7   8  951.01   22.84
   3   7   8  945.00   26.24
   3   7   8  958.88   20.80
   3   7   9  194.14   11.53
   3   7   9  210.85    8.53
   3   7  10  834.72   18.90
   3   8 -15   29.28    7.59
  -3   8 -15   39.12    6.91
  -3   8 -15   31.07    6.71
   3   8 -14   16.05    5.76
  -3   8 -14    9.82    4.37
  -3   8 -14    2.69    4.11
  -3   8 -13   13.92    4.81
  -3   8 -13   14.90    6.15
   3   8 -13   15.52    5.46
   3   8 -12   16.07    5.91
  -3   8 -12   17.99    5.66
   3   8 -11   25.42    6.31
  -3   8 -11   17.29    5.19
   3   8 -10   28.44    6.20
  -3  -8 -10   24.50    2.89
  -3   8 -10   24.30    5.49
   3  -8 -10   26.76    3.78
   3  -8  -9   32.45    4.17
   3   8  -9   31.13    5.83
  -3  -8  -9   41.55    3.60
  -3   8  -9   41.28    6.40
   3   8  -8   53.24    6.99
   3  -8  -8   34.84    4.29
  -3  -8  -8   34.42    3.47
  -3   8  -8   41.43    6.56
  -3   8  -7   92.71    8.67
   3  -8  -7  107.76    6.93
  -3  -8  -7  107.80    5.96
   3   8  -7  113.07    9.60
  -3  -8  -6   81.25    5.32
   3  -8  -6   80.14    5.96
  -3   8  -6   78.27    7.77
   3   8  -6   94.47    8.40
  -3  -8  -5   90.10    5.79
   3   8  -5  100.81    8.34
   3   8  -5   92.74    8.07
   3  -8  -5   92.78    6.52
  -3   8  -5   83.78    7.73
  -3  -8  -4  455.59   13.88
  -3   8  -4  471.95   17.84
   3  -8  -4  454.65   14.89
   3   8  -4  473.06   17.91
  -3  -8  -3  179.49    8.53
   3  -8  -3  176.58    9.04
  -3   8  -3  192.83   11.00
   3   8  -3  198.77   10.82
   3   8  -2   17.60    3.54
   3  -8  -2   15.76    3.25
  -3   8  -2   18.54    4.28
   3  -8  -1  189.39    9.75
  -3   8  -1  175.39    9.96
   3   8  -1  196.80   10.16
   3  -8   0  128.12    8.23
   3   8   0  129.06    8.05
  -3   8   0  143.20    8.73
   3  -8   1  185.78   10.06
   3   8   1  195.38    9.66
  -3   8   1  198.63   10.23
  -3   8   2   19.05    3.52
  -3   8   2   15.82    3.09
   3  -8   2   18.11    3.61
   3   8   2   16.62    3.29
  -3   8   3  174.84    9.20
   3   8   3  177.93    8.72
   3  -8   3  189.50   10.59
  -3   8   3  179.80    9.34
   3   8   4  464.55   14.17
  -3   8   4  466.86   16.15
  -3   8   4  456.52   15.05
   3  -8   4  485.23   17.78
  -3   8   5   90.90    6.52
  -3   8   5   91.50    7.53
   3   8   5   82.24    5.74
  -3   8   6   76.83    5.96
   3   8   6   78.19    5.35
  -3   8   6   82.67    7.39
   3   8   7  106.47    5.94
   3   8   7  105.20    8.19
  -3   8   7   98.36    6.78
  -3   8   8   34.43    4.29
   3   8   8   37.53    3.70
   3   8   8   39.91    5.51
   3   8   9   32.98    3.26
   3   8  10   26.84    3.07
  -3   9 -15   70.63   10.35
   3   9 -14  457.17   23.93
  -3   9 -14  485.31   24.25
  -3   9 -14  422.24   19.98
   3   9 -13  229.30   16.62
  -3   9 -13  239.80   16.80
   3   9 -12  447.25   22.12
  -3   9 -12  481.82   22.92
  -3   9 -11  124.37   11.80
   3   9 -11  109.61   10.70
  -3  -9 -10  531.58   12.34
   3   9 -10  559.76   23.45
  -3   9 -10  564.54   23.38
  -3  -9  -9   32.66    3.11
  -3   9  -9   36.80    6.43
   3   9  -9   42.34    7.34
   3  -9  -9   29.27    3.81
  -3  -9  -8  832.02   18.01
   3   9  -8  858.24   28.11
  -3   9  -8  845.56   27.99
   3  -9  -8  805.73   20.63
  -3  -9  -7  224.12    8.51
  -3   9  -7  218.77   13.31
   3  -9  -7  202.69    9.49
   3   9  -7  208.69   13.02
  -3  -9  -6  966.18   20.97
  -3   9  -6  993.52   28.82
   3  -9  -6  910.55   22.61
   3   9  -6  967.47   28.35
  -3  -9  -5  473.16   13.83
   3  -9  -5  459.67   14.97
  -3   9  -5  477.61   18.74
   3   9  -5  460.23   18.29
   3   9  -4 1764.73   38.91
   3  -9  -4 1648.14   34.09
  -3   9  -4 1790.75   39.58
   3   9  -4 1820.04   39.74
   3  -9  -3 1283.92   28.93
  -3   9  -3 1364.98   32.75
   3   9  -3 1398.97   32.76
   3  -9  -2 1576.93   33.75
   3   9  -2 1689.78   36.50
  -3   9  -2 1682.01   36.76
   3  -9  -1  280.89   12.18
  -3   9  -1  307.90   13.40
   3   9  -1  297.75   12.86
   3  -9   0 2002.43   40.25
   3   9   0 2042.83   39.92
  -3   9   0 2015.15   40.39
   3  -9   1  267.08   12.46
   3   9   1  265.16   11.53
  -3   9   1  284.29   12.40
   3  -9   2 1616.11   35.67
   3   9   2 1600.64   32.78
  -3   9   2 1631.71   33.03
  -3   9   2 1601.72   33.69
  -3   9   3 1317.04   29.10
   3   9   3 1281.22   27.73
   3  -9   3 1320.13   32.13
  -3   9   3 1298.58   29.47
   3   9   4 1714.24   33.08
  -3   9   4 1728.27   34.90
   3  -9   4 1789.10   39.40
  -3   9   4 1779.10   37.20
  -3   9   5  486.32   17.71
  -3   9   5  450.11   14.98
   3   9   5  466.66   13.92
  -3   9   6  990.86   27.88
  -3   9   6  982.02   23.21
   3   9   6  970.35   21.32
   3   9   7  230.32   12.41
   3   9   7  214.75    8.44
  -3   9   7  220.59    9.90
  -3   9   8  830.53   20.68
   3   9   8  810.32   17.72
   3   9   9   24.38    2.66
   3  10 -14   21.96    7.09
  -3  10 -14   30.24    7.22
   3  10 -13  106.31   11.74
  -3  10 -13   92.12   10.90
   3  10 -12   39.33    7.87
  -3  10 -12   48.59    8.51
   3  10 -11  244.66   16.15
  -3  10 -11  220.25   15.50
   3  10 -10   70.88    8.76
  -3  10 -10   85.23    9.82
  -3  10  -9  549.35   22.99
   3 -10  -9  509.56   15.27
   3  10  -9  548.69   23.05
  -3  10  -8  214.75   13.84
   3 -10  -8  187.24    8.96
   3  10  -8  216.19   13.90
   3  10  -7  172.34   12.14
  -3  10  -7  175.61   12.19
   3 -10  -7  153.05    8.17
   3 -10  -6   94.72    6.50
  -3  10  -6  110.14    9.56
   3  10  -6  101.31    9.11
   3 -10  -5  193.43    9.49
  -3  10  -5  217.19   12.75
   3  10  -5  206.19   12.43
   3  10  -4   95.58    8.48
   3 -10  -4  109.95    7.30
  -3  10  -4   96.86    8.54
   3  10  -3  277.30   13.59
   3 -10  -3  272.29   11.74
  -3  10  -3  254.40   13.15
   3  10  -3  247.52   12.86
   3 -10  -2  214.94   10.64
  -3  10  -2  229.36   12.16
   3  10  -2  210.69   11.52
   3 -10  -1  403.10   15.26
  -3  10  -1  433.02   16.59
   3  10  -1  413.62   15.76
   3 -10   0  164.60    9.75
   3  10   0  168.20    9.66
  -3  10   0  162.28    9.76
   3 -10   1  400.67   15.62
   3  10   1  398.57   14.66
  -3  10   1  411.41   15.45
  -3  10   2  214.68   10.84
   3 -10   2  207.12   11.36
  -3  10   2  198.32   10.30
   3  10   2  211.18   10.12
  -3  10   3  251.26   11.46
   3 -10   3  264.24   13.43
   3  10   3  246.99   10.65
  -3  10   3  244.35   11.75
  -3  10   4  123.28    7.84
   3  10   4  110.14    6.86
  -3  10   4  113.96    8.33
  -3  10   5  217.26   11.93
  -3  10   5  200.06    9.78
   3  10   5  188.46    8.58
  -3  10   6   97.25    6.68
   3  10   6   93.61    5.81
   3  10   7  173.36    7.41
  -3  10   7  177.87    8.82
  -3  10   8  200.44    9.31
   3  10   8  210.53    7.57
   3  10   9  556.85   12.43
  -3  10   9  559.65   15.90
   3  11 -13  202.11   16.22
  -3  11 -13  220.30   16.60
   3  11 -12   89.35   10.73
  -3  11 -12  101.23   11.57
   3  11 -11   17.33    5.95
  -3  11 -11   24.85    7.00
   3  11 -10  225.07   15.61
  -3  11 -10  219.73   15.21
  -3  11  -9  123.77   11.37
   3  11  -9  141.59   12.04
   3 -11  -8  351.86   12.42
  -3  11  -8  393.49   19.22
   3  11  -8  357.33   18.46
   3 -11  -7  138.24    7.83
  -3  11  -7  156.24   11.88
   3  11  -7  158.57   12.23
   3 -11  -6  410.57   14.08
  -3  11  -6  427.32   19.07
   3  11  -6  436.58   19.11
   3 -11  -5  329.70   12.79
  -3  11  -5  346.78   16.71
   3  11  -5  332.19   16.11
   3 -11  -4  505.14   16.50
  -3  11  -4  532.40   20.18
   3  11  -4  507.26   19.54
   3 -11  -3  173.65    9.58
  -3  11  -3  192.67   11.80
   3  11  -3  193.15   11.55
   3  11  -2  929.78   26.20
   3 -11  -2  898.25   24.08
  -3  11  -2  970.56   27.00
   3  11  -2  888.76   25.62
   3 -11  -1   65.93    6.33
   3  11  -1   67.96    6.54
  -3  11  -1   76.32    7.24
   3  11  -1   64.36    6.64
   3 -11   0  502.91   17.84
  -3  11   0  533.83   18.60
   3  11   0  540.55   18.10
   3 -11   1   61.82    6.36
   3  11   1   69.95    6.19
  -3  11   1   67.62    6.72
   3 -11   2  995.23   27.46
   3  11   2  919.10   23.79
  -3  11   2 1010.40   25.71
   3  11   3  166.95    9.02
  -3  11   3  186.55   10.72
  -3  11   3  176.07    9.71
  -3  11   4  529.70   17.12
   3  11   4  523.73   15.90
  -3  11   4  552.73   19.52
   3  11   5  316.21   11.48
  -3  11   5  337.40   12.95
  -3  11   6  388.84   13.74
   3  11   6  375.24   11.97
  -3  11   7  163.91    8.53
   3  11   7  137.91    6.49
   3  11   8  362.93    9.96
  -3  11   8  389.39   12.98
  -3  11   9   88.16    5.92
  -3  12 -13  354.61   21.57
   3  12 -12  159.41   14.39
  -3  12 -12  140.91   13.12
   3  12 -11  474.13   23.56
  -3  12 -11  452.58   23.16
  -3  12 -10   21.73    6.01
   3  12 -10   13.62    5.36
   3  12  -9  902.40   31.50
  -3  12  -9  889.44   31.50
  -3  12  -8  134.94   11.87
   3  12  -8  121.66   11.24
   3 -12  -7 1341.24   28.80
  -3  12  -7 1427.99   39.12
   3  12  -7 1449.68   38.90
   3 -12  -6  267.66   11.39
  -3  12  -6  286.16   16.14
   3  12  -6  319.67   16.57
   3 -12  -5  367.36   13.72
  -3  12  -5  388.65   18.03
   3  12  -5  395.51   18.02
   3 -12  -4  561.46   17.84
  -3  12  -4  625.33   22.59
   3  12  -4  578.87   21.54
   3  12  -3  819.87   25.41
   3 -12  -3  794.96   22.23
  -3  12  -3  819.77   26.00
   3 -12  -2  100.52    7.70
  -3  12  -2  110.64    9.13
   3  12  -2  102.17    8.43
   3 -12  -1 1254.14   30.47
  -3  12  -1 1253.47   31.90
   3  12  -1 1287.46   31.70
   3  12  -1 1206.28   30.58
   3  12   0   20.63    4.21
   3  12   0   21.26    4.31
   3 -12   0   21.62    4.32
  -3  12   0   27.20    4.88
   3 -12   1 1232.77   31.42
   3  12   1 1254.28   29.75
  -3  12   1 1256.37   30.68
   3  12   1 1232.52   29.20
   3  12   2  120.33    8.12
   3  12   2  109.18    7.65
  -3  12   2  112.21    8.28
  -3  12   3  873.67   25.27
   3  12   3  872.79   22.62
   3  12   3  871.71   22.06
  -3  12   3  868.63   23.70
   3  12   4  585.32   17.20
   3  12   4  580.69   16.77
  -3  12   4  604.28   18.60
   3  12   5  367.12   12.60
  -3  12   5  386.17   14.16
   3  12   5  375.86   12.48
  -3  12   6  309.05   12.29
   3  12   6  305.30   10.44
   3  12   6  294.40   10.51
   3  12   7 1241.82   24.18
  -3  12   7 1400.26   28.78
   3  12   7 1350.88   24.90
  -3  12   8   88.78    6.20
   3  12   8  123.53    5.03
  -3  12   9  872.30   20.29
   3  13 -12    6.42    5.13
  -3  13 -12   18.77    6.21
   3  13 -11   15.56    5.06
  -3  13 -11   24.97    6.81
   3  13 -10   28.44    6.88
  -3  13 -10   29.83    6.89
   3  13  -9   36.06    7.72
  -3  13  -9   54.69    8.79
   3  13  -8   66.49    8.92
  -3  13  -8   62.82    8.58
   3  13  -7   53.99    7.81
   3 -13  -7   47.93    4.70
  -3  13  -7   55.40    7.97
   3  13  -6    4.27    4.18
   3 -13  -6    0.94    2.06
  -3  13  -6   -1.30    4.02
   3  13  -5    2.08    3.76
   3 -13  -5    3.08    2.44
  -3  13  -5    1.95    3.55
   3  13  -4   59.27    7.60
   3 -13  -4   41.73    4.96
  -3  13  -4   44.78    6.85
   3  13  -3   15.82    4.36
   3 -13  -3   13.96    3.37
  -3  13  -3   14.29    4.39
   3  13  -2   33.57    5.51
   3 -13  -2   36.94    5.28
  -3  13  -2   35.55    5.65
   3  13  -1   19.76    4.42
   3 -13  -1   26.89    4.72
  -3  13  -1   35.89    5.69
   3  13   0   17.90    4.12
   3  13   0   17.31    3.77
  -3  13   0   16.96    4.03
  -3  13   1   31.34    5.29
   3  13   1   32.24    4.70
   3  13   1   29.64    4.65
   3  13   2   30.16    4.47
   3  13   2   31.75    4.70
  -3  13   2   33.49    5.01
  -3  13   3   24.15    4.47
   3  13   3   20.65    3.94
   3  13   3   14.12    3.66
   3  13   4   44.19    4.77
  -3  13   4   56.67    5.77
   3  13   4   56.70    5.33
   3  13   5    3.30    2.18
   3  13   5   -0.02    1.97
  -3  13   5   -2.10    2.38
   3  13   6    3.50    2.18
   3  13   6    0.98    1.98
  -3  13   6    4.10    2.79
  -3  13   7   40.42    4.53
   3  13   7   54.10    3.91
  -3  13   8   68.08    5.30
   3  14 -11  340.33   20.91
  -3  14 -11  330.84   20.74
   3  14 -10  129.79   12.84
  -3  14 -10  134.37   13.12
   3  14  -9  617.38   26.79
  -3  14  -9  619.12   27.02
   3  14  -8   -1.15    4.13
  -3  14  -8    2.41    4.36
   3  14  -7  662.93   26.49
  -3  14  -7  707.31   27.41
   3 -14  -6  413.52   14.67
  -3  14  -6  465.26   21.39
   3  14  -6  451.44   20.94
   3 -14  -5  682.44   20.14
   3  14  -5  742.52   26.57
  -3  14  -5  726.72   26.67
   3  14  -4  536.95   21.83
   3 -14  -4  495.65   17.28
  -3  14  -4  546.19   22.16
   3 -14  -3  239.63   12.03
   3  14  -3  258.36   14.41
  -3  14  -3  282.60   15.37
   3 -14  -2  151.86    9.65
  -3  14  -2  156.58   11.21
   3  14  -2  146.83   10.50
   3  14  -1  623.64   21.83
  -3  14  -1  686.87   23.39
   3  14   0   67.80    6.97
  -3  14   0   62.20    6.93
   3  14   0   83.32    7.73
   3  14   1  667.57   21.37
  -3  14   1  684.73   22.26
   3  14   1  656.07   21.01
   3  14   2  154.15    9.54
  -3  14   2  162.72   10.22
   3  14   2  150.01    9.24
   3  14   3  248.43   11.76
   3  14   3  245.88   11.48
  -3  14   3  256.13   12.58
  -3  14   4  537.20   18.28
   3  14   4  504.86   16.46
   3  14   4  558.65   16.93
   3  14   5  731.99   19.23
  -3  14   5  712.26   20.93
   3  14   5  700.63   18.50
  -3  14   6  359.63   13.60
   3  14   6  346.18   11.43
  -3  14   7  507.46   15.77
   3  15 -10  226.47   16.82
  -3  15 -10  226.13   17.11
   3  15  -9   37.40    8.09
  -3  15  -9   31.32    7.18
   3  15  -8  345.22   19.93
  -3  15  -8  364.75   20.69
   3  15  -7   39.18    7.56
  -3  15  -7   53.08    8.35
  -3  15  -6  499.86   22.98
   3  15  -6  474.74   21.92
   3  15  -5  373.69   18.87
   3 -15  -5  345.83   13.97
  -3  15  -5  375.29   19.06
   3 -15  -4  469.91   17.09
   3  15  -4  515.09   21.47
  -3  15  -4  530.18   22.24
   3 -15  -3  206.56   11.37
  -3  15  -3  238.65   14.56
   3  15  -3  242.62   14.23
   3 -15  -2  286.70   13.93
  -3  15  -2  300.83   15.84
   3  15  -2  305.88   15.56
   3  15  -1   76.93    7.90
  -3  15  -1   73.66    8.05
  -3  15   0  421.50   17.97
   3  15   0  407.45   17.01
   3  15   1   91.16    7.88
   3  15   1   77.36    7.34
  -3  15   1   72.59    7.48
   3  15   2  301.71   13.78
  -3  15   2  317.12   14.72
   3  15   2  317.30   13.91
   3  15   3  212.64   11.00
  -3  15   3  216.27   11.81
   3  15   3  229.86   11.25
   3  15   4  472.56   15.78
  -3  15   4  452.72   16.95
   3  15   4  354.46   13.67
  -3  15   5  312.88   13.37
   3  15   5  268.79   10.94
   3  15   6  496.53   14.12
  -3  15   6  494.56   16.51
  -3  15   7   49.20    4.98
   3  16  -9  159.61   14.27
  -3  16  -9  159.58   14.48
   3  16  -8   59.53    8.90
  -3  16  -8   68.23    9.33
   3  16  -7  140.44   12.65
  -3  16  -7  146.73   13.12
   3  16  -6   71.11    8.97
  -3  16  -6   77.45    9.68
   3  16  -5   13.58    4.82
  -3  16  -5   15.13    5.52
   3  16  -4   24.50    5.80
  -3  16  -4   21.10    5.89
   3  16  -3   69.93    8.63
   3 -16  -3   88.80    7.91
  -3  16  -3   88.86    9.34
   3  16  -2  184.56   12.49
  -3  16  -2  183.76   12.84
   3  16  -1   93.21    8.79
  -3  16  -1   93.72    9.30
  -3  16   0   17.74    4.88
   3  16   0   11.57    3.73
  -3  16   1   86.41    8.21
   3  16   1   91.93    8.19
   3  16   2  190.78   10.91
   3  16   2  202.00   11.36
  -3  16   2  184.74   11.59
   3  16   3   93.79    7.46
   3  16   3   85.10    7.26
  -3  16   3   90.65    8.05
   3  16   4   12.02    3.36
  -3  16   4   18.69    4.23
   3  16   5   16.41    3.36
  -3  16   5   16.87    3.78
  -3  16   6   78.56    6.73
   3  17  -9   43.61    8.40
   3  17  -8  746.79   31.03
  -3  17  -8  807.92   32.10
   3  17  -7   48.95    7.92
  -3  17  -7   29.47    7.14
   3  17  -6  409.85   21.59
  -3  17  -6  427.79   22.15
   3  17  -5   75.13    9.35
  -3  17  -5   73.86    9.34
   3  17  -4  234.17   15.24
  -3  17  -4  253.55   16.05
   3  17  -3  166.06   12.59
  -3  17  -3  152.02   12.43
   3  17  -2  770.57   26.74
  -3  17  -2  790.96   27.93
   3  17  -1  131.93   10.72
  -3  17  -1  134.44   11.03
   3  17   0 1138.11   31.79
  -3  17   0 1174.29   33.25
  -3  17   1  139.71   10.64
   3  17   1  136.29   10.03
   3  17   2  774.88   23.75
  -3  17   2  803.74   25.52
   3  17   3  167.59   10.03
  -3  17   3  162.85   10.84
   3  17   4  245.32   11.60
  -3  17   4  247.81   12.80
  -3  17   5   79.64    7.21
   3  18  -8   27.92    6.82
   3  18  -7  108.79   11.83
  -3  18  -7  102.00   11.56
   3  18  -6   14.27    5.55
  -3  18  -6   21.35    5.97
   3  18  -5   20.08    6.04
  -3  18  -5    5.73    4.07
   3  18  -4   -4.69    4.68
  -3  18  -4   10.55    5.00
   3  18  -3   79.05    9.16
  -3  18  -3   89.90    9.95
   3  18  -2   68.96    8.37
  -3  18  -2   60.92    8.58
   3  18  -1  128.52   10.73
  -3  18  -1  124.47   11.15
   3  18   0   13.02    4.22
  -3  18   0    6.43    4.13
   3  18   1  122.92    9.68
  -3  18   1  117.31    9.94
  -3  18   2   89.65    8.57
   3  18   2   77.54    7.63
   3  18   3   85.49    7.46
  -3  18   3   92.57    8.57
  -3  18   4    3.61    3.15
   3  19  -7   27.35    7.67
   3  19  -6  164.58   14.45
  -3  19  -6  177.06   14.88
   3  19  -5   19.78    6.02
  -3  19  -5   19.58    5.99
   3  19  -4   50.27    7.99
  -3  19  -4   53.11    8.45
   3  19  -3  188.84   14.02
  -3  19  -3  174.22   13.77
   3  19  -2  356.97   18.66
  -3  19  -2  377.31   19.80
   3  19  -1   99.23    9.92
  -3  19  -1  109.72   10.81
   3  19   0  619.55   23.62
  -3  19   0  693.51   25.83
   3  19   1   95.92    9.03
  -3  19   1   90.78    9.31
   3  19   2  368.83   16.52
  -3  19   2  369.89   17.58
  -3  19   3  168.72   11.53
   3  20  -6   51.14    8.46
   3  20  -5  248.92   17.31
  -3  20  -5  242.50   17.52
   3  20  -4   78.72    9.95
  -3  20  -4   90.97   10.80
   3  20  -3  236.82   16.19
  -3  20  -3  253.59   17.16
   3  20  -2  213.25   14.92
  -3  20  -2  209.40   15.24
   3  20  -1  389.67   19.33
  -3  20  -1  397.48   20.39
   3  20   0    6.02    3.75
  -3  20   0   17.57    5.32
   3  20   1  411.69   18.54
  -3  20   1  419.70   19.85
  -3  20   2  207.71   13.41
   3  21  -5   70.62   10.01
   3  21  -4   14.90    5.16
  -3  21  -4   16.26    5.83
   3  21  -3   -0.92    4.67
  -3  21  -3    7.93    4.82
   3  21  -2   15.02    5.87
  -3  21  -2    9.45    5.33
   3  21  -1    7.06    4.82
  -3  21  -1   -4.27    4.89
   3  21   0   21.69    5.72
  -3  21   0   21.34    6.20
  -3  21   1    9.16    4.15
   3  22  -4  141.58   13.83
   3  22  -3  246.64   17.32
  -3  22  -3  279.14   18.48
   3  22  -2   85.33   10.20
  -3  22  -2   79.57   10.73
   3  22  -1  245.86   15.99
  -3  22  -1  251.54   16.96
  -3  22   0   12.66    5.20
   3  23  -2  123.74   12.41
  -3  23  -2  145.70   13.75
  -3  23  -1   54.47    8.78
   4   0 -15   26.29    6.02
   4   0 -14  521.06   26.07
  -4   0 -14  541.61   22.12
   4   0 -14  529.66   22.56
   4   0 -13  339.26   20.02
  -4   0 -13  316.99   16.49
   4   0 -13  324.23   17.19
  -4   0 -12  156.09   11.28
   4   0 -12  148.34   11.24
   4   0 -12  159.91   13.38
  -4   0 -11  408.15   17.93
   4   0 -11  410.53   20.30
   4   0 -10 1028.18   31.94
  -4   0 -10 1028.97   29.29
   4   0  -9  505.77   20.61
  -4   0  -9  548.65   19.87
   4   0  -8 1554.79   37.59
  -4   0  -8 1571.26   36.50
   4   0  -7  318.86   14.84
  -4   0  -7  305.32   14.05
   4   0  -6 1215.23   30.81
  -4   0  -6 1162.22   29.43
  -4   0  -5   54.68    5.98
   4   0  -5   48.24    5.70
  -4   0  -4  232.38   11.79
   4   0  -4  239.62   11.90
   4   0  -3  666.11   20.65
  -4   0  -3  653.05   20.18
   4   0  -2 1192.54   28.90
  -4   0  -2 1121.96   27.89
   4   0  -1 2676.35   49.03
  -4   0  -1 2538.49   48.09
  -4   0   0 3696.04   63.31
   4   0   0 3751.87   63.55
  -4   0   1 2530.94   47.61
   4   0   1 2549.01   47.69
  -4   0   2 1079.67   27.20
   4   0   2 1082.87   27.02
   4   0   3  710.86   20.85
  -4   0   3  676.50   20.97
   4   0   4  244.55   11.77
  -4   0   4  244.19   12.07
  -4   0   5   49.61    5.96
   4   0   5   59.98    6.14
  -4   0   6 1137.17   29.36
   4   0   6 1165.73   28.85
   4   0   7  336.27   14.41
   4   0   8 1538.14   35.63
   4   1 -16   10.31    5.72
  -4   1 -15   64.77    8.42
   4  -1 -15   59.33    8.01
   4   1 -15   59.09    8.32
  -4   1 -14   44.39    7.20
   4   1 -14   40.14    6.94
  -4  -1 -14   32.35    5.63
   4  -1 -14   38.35    7.94
   4   1 -14   25.64    7.47
   4  -1 -14   29.13    5.77
  -4   1 -13   40.34    6.39
   4   1 -13   50.20    7.33
   4  -1 -13   42.59    8.20
  -4  -1 -13   49.01    6.66
   4  -1 -13   44.86    6.43
   4   1 -13   47.08    8.45
   4  -1 -12  162.80   13.47
  -4   1 -12  147.68   11.07
   4   1 -12  155.99   13.22
  -4  -1 -12  176.72   11.56
   4  -1 -12  170.54   11.92
   4   1 -12  162.58   11.99
  -4  -1 -11  109.93    9.05
   4  -1 -11   91.44    9.97
   4   1 -11  133.18   11.74
  -4   1 -11  124.17   10.19
   4   1 -11   95.73    9.09
   4  -1 -10  102.39   10.06
  -4  -1 -10  117.21    9.14
   4   1 -10  127.75   10.98
  -4   1 -10  115.02    9.47
   4  -1  -9  284.25   15.33
  -4   1  -9  290.58   14.62
  -4  -1  -9  296.31   14.12
  -4   1  -8  131.97    9.58
   4  -1  -8  132.85    9.92
  -4  -1  -8  134.04    9.20
   4  -1  -7  246.93   12.77
   4  -1  -7  214.37   12.04
  -4   1  -7  222.04   12.24
  -4  -1  -7  220.37   11.60
  -4   1  -6    6.23    3.63
  -4  -1  -6    1.34    2.72
   4  -1  -6    0.08    2.62
   4  -1  -6    3.79    2.88
   4   1  -6    1.47    2.85
  -4  -1  -5  146.52    9.38
   4  -1  -5  158.72    9.81
   4   1  -5  162.80   10.09
   4  -1  -5  147.22    8.83
  -4   1  -5  153.92    9.80
  -4   1  -4    2.66    2.77
   4  -1  -4    7.13    2.72
  -4  -1  -4    4.79    2.93
   4  -1  -4    4.70    2.68
   4   1  -4    6.61    3.00
  -4   1  -3  309.70   13.43
   4  -1  -3  308.19   13.42
  -4  -1  -3  303.34   13.10
   4   1  -3  319.57   13.85
   4  -1  -3  297.08   10.73
   4  -1  -2  786.96   22.34
  -4   1  -2  757.25   21.98
   4   1  -2  790.07   22.52
  -4  -1  -2  744.71   21.47
   4  -1  -2  739.13   16.91
   4  -1  -1   32.20    4.69
   4   1  -1   42.86    5.31
  -4   1  -1   31.98    4.90
  -4  -1  -1   30.11    4.54
   4  -1  -1   33.93    2.96
   4   1   0   95.31    7.39
   4  -1   0   82.26    3.54
  -4   1   0   84.46    6.98
  -4  -1   0   88.39    7.18
   4  -1   0   93.23    7.45
  -4  -1   1   37.87    5.19
   4  -1   1   47.66    5.66
   4   1   1   52.74    5.51
  -4   1   1   39.62    5.31
  -4   1   2  752.90   21.70
  -4  -1   2  688.21   21.11
   4  -1   2  759.65   21.75
   4   1   2  777.22   21.62
   4   1   3  284.60    6.42
  -4   1   3  278.36   12.87
   4  -1   3  288.45   13.13
   4   1   3  291.82   12.71
  -4  -1   3  300.32   13.33
   4   1   4    5.58    1.18
  -4   1   4    3.54    2.97
  -4  -1   4    6.28    3.45
   4  -1   4    8.84    2.97
   4   1   4    9.52    3.60
  -4   1   5  163.67    9.94
  -4  -1   5  131.69    9.26
   4  -1   5  147.70    9.23
   4   1   5  140.60    8.89
  -4   1   6    0.94    2.88
  -4  -1   6   -0.23    2.79
   4  -1   6    9.60    3.57
   4   1   6    2.73    2.63
  -4   1   7  225.07   12.17
   4  -1   7  232.10   12.26
   4   1   7  240.60   11.94
   4  -1   8  138.82    9.56
   4   1   8  134.91    9.29
   4   1   9  272.25   13.15
   4   2 -16  341.19   19.54
  -4   2 -15  112.85   11.04
   4   2 -15  134.30   12.13
  -4   2 -14   74.58    8.83
   4   2 -14   81.20    9.37
   4  -2 -14   82.14    8.63
   4  -2 -14   83.92   10.66
   4   2 -14   78.14   10.72
  -4   2 -13   17.91    4.76
   4  -2 -13    8.24    3.70
   4   2 -13   20.22    5.80
  -4  -2 -13   20.77    4.71
   4  -2 -13   21.73    6.68
   4   2 -13   14.96    5.26
   4  -2 -12  126.00   11.91
   4   2 -12  105.16   11.27
  -4   2 -12  116.27   10.19
   4  -2 -12  116.42    9.64
   4   2 -12  119.25   10.70
  -4  -2 -12  122.35    9.41
  -4   2 -11   78.50    8.26
   4  -2 -11   90.19    9.97
   4   2 -11   96.92    9.41
  -4  -2 -11   94.92    8.24
   4  -2 -10  510.84   21.67
  -4   2 -10  524.73   20.60
  -4  -2 -10  516.40   18.98
   4  -2  -9  252.56   14.40
  -4  -2  -9  265.32   13.14
  -4   2  -9  262.93   14.05
  -4  -2  -8  628.35   20.51
   4  -2  -8  658.07   22.70
   4  -2  -8  658.07   21.88
  -4   2  -8  633.15   21.93
   4  -2  -7  321.14   14.75
  -4  -2  -7  340.29   14.35
   4  -2  -7  356.32   15.39
  -4   2  -7  350.10   15.70
   4  -2  -6  273.19   12.71
  -4  -2  -6  281.98   12.85
   4  -2  -6  278.87   13.25
   4   2  -6  299.52   14.39
  -4   2  -6  269.05   13.55
   4  -2  -5  317.64   12.96
   4  -2  -5  350.05   14.69
  -4  -2  -5  333.73   13.96
  -4   2  -5  323.68   14.40
   4   2  -5  333.34   15.03
   4  -2  -4  130.71    7.57
   4  -2  -4  128.29    8.79
  -4  -2  -4  110.76    8.01
   4   2  -4  142.49    9.50
  -4   2  -4  130.48    8.99
   4  -2  -3   75.29    6.72
   4  -2  -3   71.04    5.20
  -4   2  -3   69.42    6.78
   4   2  -3   74.72    6.86
  -4  -2  -3   66.08    6.20
  -4   2  -2 2032.11   41.65
   4   2  -2 2096.99   42.15
   4  -2  -2 2028.50   34.38
  -4  -2  -2 2081.30   40.87
   4  -2  -2 2079.57   41.44
  -4   2  -1  953.08   25.20
   4   2  -1 1018.10   25.77
  -4  -2  -1  916.89   24.47
   4  -2  -1  906.92   17.64
   4  -2  -1  972.87   25.37
   4   2   0 2345.62   45.39
  -4   2   0 2394.88   45.58
  -4  -2   0 2268.15   44.63
   4  -2   0 2421.19   45.65
  -4   2   1  921.52   24.68
  -4  -2   1  935.78   25.00
   4  -2   1  950.47   25.04
   4   2   1  967.70   24.84
  -4   2   2 2056.21   41.53
   4  -2   2 2109.62   42.08
  -4  -2   2 2016.82   41.30
   4   2   2 2122.99   41.33
  -4   2   3   80.07    7.09
   4  -2   3   70.54    6.65
   4   2   3   84.92    6.76
  -4  -2   3   77.97    7.14
  -4  -2   4  124.46    8.96
   4   2   4  131.89    5.22
   4  -2   4  126.13    8.78
  -4   2   4  131.14    8.97
   4   2   4  126.74    8.20
  -4  -2   5  289.16   13.82
   4  -2   5  334.35   14.31
   4   2   5  325.51   13.37
  -4   2   5  280.94   13.06
   4   2   5  309.91    9.01
  -4   2   6  269.47   12.90
   4  -2   6  277.51   13.23
   4   2   6  258.19   12.16
  -4   2   7  301.95   13.99
   4  -2   7  349.28   15.20
   4   2   7  333.19   14.01
   4   2   8  615.86   19.86
   4   2   9  245.04   12.23
   4   2  10  479.29   17.88
   4   3 -16   82.53   10.39
  -4   3 -16   76.53    9.87
  -4   3 -15  321.92   18.61
   4   3 -15  313.94   18.68
   4   3 -14  102.52   11.69
   4   3 -14  135.48   12.19
   4  -3 -14  152.46   14.19
   4  -3 -14  107.30    9.63
  -4   3 -14  116.49   11.17
  -4  -3 -13   98.13    8.44
   4   3 -13   83.68    9.65
   4   3 -13  107.36   12.02
   4  -3 -13  123.88   12.35
   4  -3 -13   92.63    8.78
  -4   3 -13   85.39    9.49
  -4  -3 -12  177.05   10.95
  -4   3 -12  180.96   10.40
   4  -3 -12  173.28   14.10
   4  -3 -12  167.09   11.19
  -4   3 -12  161.60   12.16
   4   3 -12  187.59   13.35
  -4  -3 -11  284.58   13.60
  -4   3 -11  203.09   10.41
   4  -3 -11  278.95   16.54
  -4   3 -11  281.04   15.72
   4   3 -11  275.44   15.63
  -4   3 -10  622.07   17.70
  -4  -3 -10  636.30   20.75
   4  -3 -10  634.37   24.36
   4   3 -10  611.37   23.24
  -4   3 -10  623.83   23.33
  -4   3  -9 1402.57   27.79
  -4  -3  -9 1416.03   33.00
   4  -3  -9 1395.92   34.54
   4  -3  -9 1347.56   36.21
  -4   3  -9 1428.13   36.36
  -4  -3  -8  175.22   10.19
   4  -3  -8  147.22    9.93
   4  -3  -8  135.85   10.10
  -4   3  -8  135.48   10.13
   4  -3  -7 1100.84   28.90
  -4  -3  -7 1109.66   27.75
   4  -3  -7 1085.15   29.08
  -4   3  -7 1133.30   30.37
   4  -3  -6  254.47   12.70
  -4  -3  -6  252.14   11.93
   4  -3  -6  238.28   12.04
  -4   3  -6  275.72   13.68
   4  -3  -5  608.16   19.83
  -4  -3  -5  610.31   19.05
   4  -3  -5  612.26   18.55
   4   3  -5  652.97   21.47
  -4   3  -5  622.43   21.03
  -4  -3  -4  183.32   10.11
   4  -3  -4  191.52    9.26
   4   3  -4  195.51   11.29
  -4   3  -4  189.81   10.99
   4  -3  -4  198.27   10.88
   4   3  -3  875.93   24.49
  -4  -3  -3  792.71   22.31
  -4   3  -3  809.62   23.64
   4  -3  -3  812.69   19.33
   4  -3  -3  800.10   22.98
  -4   3  -2  431.92   16.37
   4   3  -2  457.58   16.66
  -4  -3  -2  413.29   15.39
   4  -3  -2  419.44   11.86
   4  -3  -2  430.07   15.94
  -4   3  -1 2148.51   42.90
   4   3  -1 2183.69   42.89
  -4  -3  -1 2088.67   41.66
   4  -3  -1 2125.58   42.40
   4   3   0  795.07   22.72
  -4   3   0  758.80   22.27
  -4  -3   0  783.10   22.19
   4  -3   0  767.87   22.10
   4   3   1 2151.90   42.14
  -4   3   1 2087.94   42.12
   4  -3   1 2134.83   42.49
  -4  -3   1 2123.51   42.15
  -4   3   2  438.63   16.05
   4  -3   2  406.03   15.80
  -4  -3   2  411.51   16.07
   4   3   2  433.12   15.55
  -4  -3   3  816.64   23.90
  -4   3   3  828.99   23.24
   4  -3   3  860.29   23.99
   4   3   3  851.04   22.84
  -4  -3   4  164.44   10.29
   4  -3   4  184.23   10.56
  -4   3   4  171.20   10.11
   4   3   4  169.33    9.43
   4   3   5  604.15   14.72
   4  -3   5  622.66   20.63
   4   3   5  610.05   18.92
  -4  -3   5  601.41   20.52
  -4   3   5  607.20   19.62
   4  -3   6  249.31   12.78
   4   3   6  253.42   11.72
  -4   3   6  234.43   11.93
   4   3   6  237.46    9.03
  -4   3   7 1093.11   28.32
   4   3   7 1099.02   27.14
   4   3   7 1078.84   23.47
  -4   3   8  141.09    9.57
   4   3   8  149.44    9.19
   4   3   9 1349.61   31.70
   4   3  10  585.40   19.53
   4   3  11  270.01   13.08
   4   4 -16   31.51    7.37
  -4   4 -16   41.32    7.89
   4   4 -15   37.41    7.52
  -4   4 -15   50.57    8.59
   4   4 -14   11.38    4.84
   4   4 -14    5.71    5.21
   4  -4 -14   19.72    6.92
  -4   4 -14   10.47    4.99
   4  -4 -13  100.91    8.79
   4  -4 -13   69.08    9.97
   4   4 -13   91.72    9.95
  -4   4 -13   87.08    7.90
  -4   4 -13   90.49   10.04
   4   4 -12   -0.97    4.23
   4  -4 -12    3.96    4.14
  -4  -4 -12    3.45    2.48
  -4   4 -12    3.84    2.95
  -4   4 -12    4.01    4.80
  -4  -4 -11  139.65    9.31
   4  -4 -11  143.29   12.05
  -4   4 -11  125.08   10.82
  -4   4 -11  103.62    7.47
   4   4 -11  123.48   10.84
  -4   4 -10   17.37    3.43
  -4  -4 -10   21.86    4.44
   4  -4 -10   22.70    5.64
  -4   4 -10   22.26    5.29
   4   4 -10   17.41    4.49
   4  -4  -9   54.60    6.44
  -4  -4  -9   59.57    6.10
  -4   4  -9   56.46    4.72
   4  -4  -9   58.03    7.65
  -4   4  -9   61.77    7.89
  -4   4  -8   13.57    2.29
   4  -4  -8   18.71    3.81
  -4  -4  -8   14.66    3.55
   4  -4  -8   11.01    3.86
  -4   4  -8   13.46    4.29
   4  -4  -7  161.86   10.08
  -4  -4  -7  161.16    9.40
   4  -4  -7  155.05   10.19
  -4   4  -7  145.08    5.80
  -4   4  -7  157.18   10.89
  -4   4  -6    8.07    4.18
   4  -4  -6    0.30    2.82
   4  -4  -6    5.85    3.18
  -4  -4  -6    2.81    2.63
  -4  -4  -5  268.79   12.01
   4  -4  -5  244.94   11.40
  -4   4  -5  257.53   13.21
   4  -4  -5  262.15   12.52
  -4   4  -4   21.75    4.81
   4  -4  -4   20.80    3.60
   4  -4  -4   17.95    3.92
  -4  -4  -4   17.00    3.64
   4   4  -4   19.52    4.30
   4  -4  -3  196.36    8.69
   4   4  -3  204.09   11.41
  -4  -4  -3  186.27   10.13
   4  -4  -3  194.09   10.75
  -4   4  -3  193.26   11.16
   4  -4  -2   20.43    3.97
  -4   4  -2    5.29    3.38
  -4  -4  -2   15.49    3.77
   4   4  -2   11.93    3.49
  -4   4  -1  192.71   10.91
   4   4  -1  218.02   11.42
  -4  -4  -1  192.05   10.30
   4  -4  -1  223.15   11.24
  -4   4   0  122.17    8.70
   4   4   0  117.10    8.24
   4  -4   0  119.61    8.36
  -4  -4   0  117.21    8.27
   4   4   1  205.95   10.70
  -4   4   1  195.70   10.81
  -4  -4   1  207.78   11.12
   4  -4   1  205.89   10.96
   4   4   2    5.12    2.45
  -4  -4   2    8.02    3.33
  -4   4   2    8.15    3.57
   4  -4   2   10.26    3.47
  -4  -4   3  173.81   10.64
  -4   4   3  172.41   10.15
   4   4   3  181.88    9.96
   4  -4   3  188.70   10.72
   4   4   4   20.13    4.05
  -4  -4   4   22.07    4.74
   4  -4   4   19.69    4.07
  -4   4   4   15.35    3.79
   4  -4   5  281.50   13.49
  -4   4   5  261.40   12.44
   4   4   5  241.87   11.34
   4   4   5  250.70    9.50
   4   4   6    2.64    1.96
  -4   4   6    4.26    2.83
   4   4   6    1.39    2.45
  -4   4   7  159.08   10.01
   4   4   7  148.68    8.94
   4   4   7  150.37    8.03
   4   4   8   17.18    3.61
  -4   4   8   20.67    4.49
   4   4   8   22.51    4.31
   4   4   9   54.05    5.66
   4   4  10   17.45    3.71
   4   4  11  131.59    8.97
  -4   5 -16  198.10   15.76
   4   5 -15  253.35   17.31
  -4   5 -15  278.32   18.04
  -4   5 -14  180.63   14.20
   4   5 -14  206.67   15.35
   4  -5 -14  190.03   15.89
   4  -5 -13  192.20   11.72
  -4   5 -13  203.03   14.81
   4  -5 -13  169.30   14.49
   4   5 -13  188.75   14.35
   4   5 -12  117.21   10.91
  -4  -5 -12  135.08    9.00
   4  -5 -12  123.07   11.98
  -4   5 -12  125.18    8.80
  -4   5 -12  130.64   11.65
  -4  -5 -11  599.59   19.46
  -4   5 -11  625.96   18.93
  -4   5 -11  561.42   23.47
   4  -5 -11  574.27   24.57
   4   5 -11  599.28   24.35
   4   5 -10   15.87    4.80
   4  -5 -10   17.43    4.15
  -4   5 -10   11.80    2.97
  -4  -5 -10   23.88    4.35
  -4   5 -10   25.20    5.61
   4  -5 -10   26.38    5.49
   4  -5  -9 1067.11   29.10
  -4   5  -9 1196.07   24.80
  -4  -5  -9 1119.33   27.84
  -4   5  -9 1161.62   33.22
   4  -5  -9 1156.69   33.25
   4   5  -9 1120.28   32.97
   4  -5  -8  392.81   16.12
  -4   5  -8  387.06   11.61
  -4  -5  -8  391.84   14.86
  -4   5  -8  414.81   18.39
   4  -5  -8  375.41   17.08
  -4   5  -7 1576.97   26.49
  -4  -5  -7 1525.47   33.39
  -4   5  -7 1541.34   38.24
   4  -5  -7 1509.32   36.34
   4  -5  -7 1521.11   35.11
  -4   5  -6 1074.69   18.25
  -4  -5  -6 1055.30   26.21
   4  -5  -6 1015.75   27.17
  -4   5  -6 1103.30   30.25
   4  -5  -6 1042.32   27.41
   4  -5  -5  407.46   15.03
  -4   5  -5  383.44    7.28
  -4  -5  -5  368.83   14.20
   4  -5  -5  391.69   15.51
  -4   5  -5  413.13   17.12
  -4  -5  -4  827.58   22.49
   4   5  -4  843.28   25.08
  -4   5  -4  848.69   25.23
   4  -5  -4  864.90   24.00
   4   5  -3  478.89   18.23
  -4  -5  -3  475.80   16.38
   4  -5  -3  495.51   17.48
  -4   5  -3  500.25   18.47
   4   5  -2  302.66   13.78
  -4  -5  -2  309.12   13.01
   4  -5  -2  313.05   13.53
  -4   5  -2  284.15   13.64
   4   5  -1 2230.17   44.23
   4  -5  -1 2229.26   44.11
  -4  -5  -1 2164.54   42.89
  -4   5  -1 2191.73   44.56
  -4   5   0   92.73    7.78
   4   5   0   91.82    7.58
   4  -5   0   94.37    7.60
  -4  -5   0   98.77    7.57
  -4  -5   1 2206.62   44.57
  -4   5   1 2295.02   45.07
   4   5   1 2323.33   44.68
   4  -5   1 2277.22   45.16
   4   5   2  305.21   13.00
  -4  -5   2  296.52   13.58
  -4   5   2  301.98   13.47
   4  -5   2  320.42   14.13
  -4   5   3  462.85   16.96
  -4  -5   3  476.58   17.73
   4  -5   3  511.73   18.44
   4   5   3  486.15   16.75
   4  -5   4  840.14   24.75
  -4   5   4  845.37   23.56
   4   5   4  813.32   22.49
  -4   5   5  391.74   15.45
   4   5   5  411.97   14.97
   4   5   6  978.90   23.35
   4   5   6 1061.58   25.76
  -4   5   6 1008.76   26.57
   4   5   7 1468.21   31.21
   4   5   7 1495.58   32.45
  -4   5   7 1496.28   34.04
  -4   5   8  344.77   14.70
   4   5   8  353.84   14.02
   4   5   8  356.99   13.89
   4   5   9 1044.58   26.24
   4   5   9 1067.16   27.08
   4   5  10   17.37    3.79
   4   6 -15   44.42    8.72
  -4   6 -15   34.93    7.15
  -4   6 -14  171.06   14.26
   4   6 -14  172.40   14.42
   4   6 -13   34.15    7.06
  -4   6 -13   36.95    7.33
   4  -6 -12  130.93   12.61
  -4   6 -12  126.21    8.64
   4   6 -12  126.31   11.80
  -4   6 -12  123.83   11.42
  -4   6 -11   42.80    5.25
   4   6 -11   43.52    7.10
   4  -6 -11   44.80    7.75
  -4  -6 -11   49.61    5.35
  -4   6 -11   42.83    7.22
   4  -6 -10  516.20   22.22
  -4  -6 -10  527.60   17.26
  -4   6 -10  525.09   22.48
   4   6 -10  536.99   22.50
   4  -6 -10  473.80   18.20
   4   6  -9   29.00    5.98
   4  -6  -9   39.20    5.50
  -4   6  -9   31.55    3.90
  -4  -6  -9   26.03    4.02
   4  -6  -9   28.83    6.15
  -4   6  -9   36.95    6.48
  -4  -6  -8  409.80   15.03
  -4   6  -8  399.45   18.62
  -4   6  -8  413.63   12.27
   4  -6  -8  390.19   15.92
   4  -6  -7  216.68   11.59
  -4  -6  -7  206.70   10.46
  -4   6  -7  206.32   12.92
  -4   6  -7  220.77    7.78
  -4  -6  -6  418.00   15.06
  -4   6  -6  437.11   18.39
   4  -6  -6  434.60   16.48
  -4  -6  -5  425.96   15.38
  -4   6  -5  453.71   18.41
   4  -6  -5  457.08   16.84
  -4  -6  -4   99.34    7.31
   4  -6  -4   84.77    7.40
  -4   6  -4   89.96    8.34
   4   6  -3  285.43   13.74
  -4   6  -3  253.95    5.70
   4  -6  -3  266.86   12.45
  -4  -6  -3  254.31   11.77
  -4   6  -3  275.26   13.68
  -4   6  -2  307.41    7.12
   4   6  -2  346.99   14.88
   4  -6  -2  308.30   13.58
  -4  -6  -2  301.99   12.95
  -4   6  -2  349.79   15.19
  -4   6  -1   32.75    5.13
  -4  -6  -1   28.45    4.60
  -4   6  -1   24.22    2.22
   4   6  -1   33.09    5.04
   4  -6  -1   22.14    4.22
  -4   6   0 1188.89   29.87
  -4  -6   0 1163.57   28.77
   4   6   0 1269.21   30.07
   4  -6   0 1185.13   29.56
  -4   6   0 1174.43   21.58
  -4   6   1   25.73    4.84
   4   6   1   33.46    4.69
  -4  -6   1   31.84    5.02
   4  -6   1   33.44    5.13
   4   6   2  337.90   13.86
  -4   6   2  311.16   13.90
  -4  -6   2  325.55   14.41
   4  -6   2  346.43   14.90
  -4   6   3  260.88   12.53
   4  -6   3  271.49   13.36
   4   6   3  285.39   12.54
   4   6   4   84.08    5.91
  -4   6   4   96.79    7.65
  -4   6   5  433.07   16.33
   4   6   5  450.01   15.63
   4   6   6  401.57   14.73
  -4   6   6  406.09   15.71
   4   6   6  377.23   13.88
   4   6   7  218.68   10.73
   4   6   7  187.83    9.91
  -4   6   7  213.30   11.44
   4   6   8  371.46   14.78
  -4   6   8  388.21   15.58
   4   6   8  379.59   14.22
   4   6   9   26.48    4.36
   4   6   9   31.68    4.44
  -4   6   9   33.86    4.99
   4   6  10  481.52   16.25
   4   6  10  456.88   17.97
  -4   7 -15   61.59    9.69
   4   7 -14   51.38    8.52
  -4   7 -14   44.16    7.88
   4   7 -13    0.89    4.34
  -4   7 -13   12.78    5.42
   4   7 -12   45.15    7.72
  -4   7 -12   53.55    6.11
  -4   7 -12   50.41    8.18
   4   7 -11  103.38   10.80
  -4  -7 -11  121.12    7.76
  -4   7 -11  123.18   11.67
  -4   7 -11  141.76    8.83
   4  -7 -10   26.04    4.63
   4   7 -10   33.72    6.99
  -4   7 -10   23.16    3.91
  -4   7 -10   35.73    6.68
  -4  -7 -10   34.77    4.41
  -4  -7  -9  700.17   19.99
  -4   7  -9  695.08   25.95
  -4   7  -9  734.64   18.84
   4  -7  -9  668.58   21.66
   4   7  -9  717.90   26.46
  -4  -7  -8  306.77   12.60
  -4   7  -8  276.32   15.80
   4  -7  -8  292.31   13.50
   4   7  -8  321.65   16.75
  -4  -7  -7  537.73   17.18
  -4   7  -7  534.46   21.42
   4  -7  -7  509.19   18.18
  -4  -7  -6   76.80    6.40
   4  -7  -6   83.69    7.21
  -4   7  -6   79.54    8.38
  -4  -7  -5   53.46    5.61
  -4   7  -5   47.57    6.65
   4  -7  -5   55.15    6.15
   4  -7  -4   87.44    7.22
  -4   7  -4   97.74    8.71
  -4  -7  -4   99.32    7.44
   4  -7  -3  217.36   11.47
  -4   7  -3  220.48   12.49
  -4  -7  -3  209.61   10.67
  -4  -7  -2  192.14   10.32
   4   7  -2  208.11   11.72
   4  -7  -2  201.88   11.00
  -4   7  -2  182.15    6.16
  -4   7  -2  176.38   11.19
  -4  -7  -1  649.70   20.26
  -4   7  -1  633.85   14.05
   4   7  -1  688.89   21.57
   4  -7  -1  657.18   20.84
  -4   7  -1  681.34   21.84
  -4   7   0  323.33    9.91
  -4  -7   0  305.28   13.67
   4   7   0  338.07   14.32
   4  -7   0  319.04   14.17
  -4   7   0  329.45   14.57
  -4   7   1  645.78   20.95
   4   7   1  644.85   20.39
  -4  -7   1  636.63   20.56
   4  -7   1  664.30   21.26
  -4   7   1  630.75   15.98
  -4   7   2  198.99   11.28
   4   7   2  205.93   10.85
   4  -7   2  205.78   11.64
  -4   7   2  206.86    9.08
   4   7   3  225.62   11.14
  -4   7   3  228.79   11.76
  -4   7   4  104.54    7.97
   4   7   4   85.18    6.85
   4   7   5   55.43    5.57
  -4   7   5   50.07    5.71
  -4   7   6   63.01    6.46
   4   7   6   70.62    6.12
   4   7   7  501.06   16.46
   4   7   7  512.13   17.74
  -4   7   7  519.03   18.09
  -4   7   8  271.11   12.85
   4   7   8  267.54   12.99
   4   7   8  269.01   11.56
   4   7   9  662.50   21.90
  -4   7   9  690.50   21.38
   4   7   9  683.55   19.43
   4   8 -14  313.13   19.88
  -4   8 -14  267.75   18.43
   4   8 -13  110.44   11.75
  -4   8 -13   95.55   11.07
  -4   8 -12  224.41   16.15
   4   8 -12  218.51   16.00
   4   8 -11   79.16    9.96
  -4   8 -11   68.12    6.46
  -4   8 -11   68.59    9.41
  -4   8 -10  569.57   24.39
  -4  -8 -10  575.46   17.25
   4   8 -10  610.21   25.09
  -4   8  -9  141.21   11.84
  -4  -8  -9  103.53    7.18
   4  -8  -9   96.46    7.72
   4   8  -9  126.91   11.23
  -4   8  -8 1525.74   40.21
  -4  -8  -8 1419.08   30.67
   4  -8  -8 1369.30   32.70
   4   8  -8 1424.56   38.94
  -4   8  -7  357.98   17.88
   4  -8  -7  327.16   14.24
  -4  -8  -7  339.18   13.16
   4   8  -7  344.24   17.13
  -4   8  -6  683.64   24.36
   4  -8  -6  656.13   20.77
  -4  -8  -6  679.34   19.53
   4  -8  -5  942.24   25.78
  -4   8  -5  976.72   29.33
  -4  -8  -5  972.16   24.44
  -4  -8  -4  355.82   13.87
   4  -8  -4  344.98   14.61
  -4   8  -4  361.05   16.60
  -4  -8  -3  620.19   19.38
   4  -8  -3  656.72   20.81
  -4   8  -3  673.76   22.78
  -4  -8  -2 1178.33   28.40
   4  -8  -2 1111.30   28.87
   4   8  -2 1185.00   30.81
  -4   8  -2 1181.47   31.09
  -4  -8  -1  227.36   11.60
   4   8  -1  256.10   12.99
   4  -8  -1  236.30   12.12
  -4   8  -1  226.64    8.25
  -4   8  -1  236.58   12.80
   4   8   0 1441.14   33.81
  -4   8   0 1388.58   26.80
   4  -8   0 1431.91   34.06
  -4   8   0 1445.91   34.34
  -4   8   1  244.45   12.68
  -4   8   1  269.36   10.17
   4   8   1  264.73   12.61
   4  -8   1  278.84   13.66
  -4   8   2 1212.54   30.17
   4   8   2 1149.67   28.75
  -4   8   2 1164.17   25.79
   4   8   3  654.71   19.99
  -4   8   3  648.40   20.83
  -4   8   3  652.92   18.93
  -4   8   4  341.03   14.45
  -4   8   4  319.35   13.47
   4   8   4  328.08   13.43
  -4   8   5  944.98   25.61
   4   8   5  928.23   24.17
  -4   8   6  641.54   20.28
   4   8   6  600.88   18.42
   4   8   7  321.73   12.72
  -4   8   7  329.57   14.10
   4   8   7  302.27   13.94
   4   8   8 1364.49   33.69
   4   8   8 1357.87   29.68
  -4   8   8 1420.48   32.56
  -4   8   9  100.43    7.86
   4   8   9   98.96    6.96
   4   9 -13   25.97    6.16
  -4   9 -13   41.10    8.11
   4   9 -12   78.13   10.05
  -4   9 -12   76.03   10.03
   4   9 -11   31.19    6.45
  -4   9 -11   40.71    7.81
   4   9 -10   17.00    5.67
  -4   9 -10   10.56    5.67
   4   9  -9    7.24    4.89
  -4  -9  -9    3.46    2.31
  -4   9  -9    2.43    4.00
   4  -9  -9   -0.46    2.38
   4   9  -8   95.74   10.00
  -4   9  -8  115.04   10.83
   4  -9  -8  105.59    8.04
  -4  -9  -8  117.17    7.39
   4   9  -7   10.88    4.19
  -4  -9  -7   15.82    3.47
  -4   9  -7   23.56    5.36
   4  -9  -7   10.26    3.30
  -4  -9  -6  178.56    9.42
   4  -9  -6  159.70    9.75
  -4   9  -6  149.28   11.53
   4   9  -6  173.88   12.28
  -4  -9  -5  103.15    7.30
   4  -9  -5   92.43    7.54
  -4   9  -5   91.53    9.05
  -4  -9  -4   77.42    6.51
   4  -9  -4   85.28    7.28
  -4   9  -4   85.81    8.73
  -4  -9  -3   72.85    6.57
   4  -9  -3   78.38    7.00
  -4   9  -3   78.20    7.86
   4  -9  -2  141.44    9.63
  -4  -9  -2  141.25    8.98
  -4   9  -2  146.80   10.55
   4  -9  -1  113.66    8.67
   4   9  -1  108.63    8.57
  -4   9  -1  124.37    9.51
  -4   9   0    1.30    3.90
  -4   9   0   -1.10    1.79
   4  -9   0    2.76    2.84
   4   9   0   -3.76    2.87
   4   9   1  103.25    8.05
  -4   9   1  103.01    6.62
  -4   9   1  129.99    9.45
  -4   9   2  145.48    9.74
  -4   9   2  148.74    8.37
   4   9   2  153.10    9.49
  -4   9   3   72.20    6.31
   4   9   3   90.56    7.28
  -4   9   3   82.34    7.50
   4   9   4   81.93    6.91
  -4   9   4   94.86    7.90
  -4   9   4   87.55    7.39
  -4   9   5  107.27    8.37
  -4   9   5  101.24    8.17
   4   9   5  100.63    7.32
  -4   9   6  175.17   10.24
   4   9   6  157.80    8.94
   4   9   7    9.32    3.38
  -4   9   7    8.52    3.37
   4   9   7    5.14    2.46
   4   9   8  100.86    6.91
  -4   9   8   97.51    7.68
  -4   9   9    2.98    2.73
  -4  10 -13  168.41   14.71
   4  10 -12  109.58   12.28
  -4  10 -12  133.41   12.99
  -4  10 -11  180.10   14.84
   4  10 -11  202.10   15.62
   4  10 -10  538.88   24.78
  -4  10 -10  587.57   25.68
  -4 -10  -9  278.48   10.95
  -4  10  -9  297.92   17.81
   4  10  -9  278.89   17.36
  -4 -10  -8  855.50   21.28
   4 -10  -8  803.98   23.32
  -4  10  -8  862.13   30.11
   4  10  -8  826.78   29.53
  -4 -10  -7  101.89    6.97
   4 -10  -7  107.52    8.05
  -4  10  -7  107.75   10.56
   4  10  -7  106.87   10.37
  -4 -10  -6  488.86   16.10
   4 -10  -6  504.49   17.86
  -4  10  -6  520.77   21.94
   4  10  -6  499.76   21.40
   4  10  -5   20.24    5.29
  -4 -10  -5   18.37    3.71
   4 -10  -5   18.76    3.86
  -4  10  -5   15.48    4.81
   4 -10  -4  241.68   12.31
  -4  10  -4  276.57   15.01
   4 -10  -3  431.50   16.76
  -4  10  -3  421.64   18.50
   4 -10  -2  431.92   17.10
  -4  10  -2  464.45   19.03
   4 -10  -1  555.77   19.77
  -4  10  -1  521.92   20.02
   4  10   0 1174.98   30.31
  -4  10   0 1125.81   30.58
  -4  10   0 1122.14   25.13
   4  10   1  552.66   19.24
  -4  10   1  507.76   16.17
  -4  10   1  546.20   19.71
  -4  10   2  430.00   17.45
   4  10   2  462.84   17.06
  -4  10   2  438.71   15.41
  -4  10   3  429.99   16.95
  -4  10   3  403.78   15.44
   4  10   3  440.64   16.37
   4  10   4  238.75   11.58
  -4  10   4  245.71   12.53
  -4  10   4  256.75   12.71
   4  10   5   18.34    4.04
  -4  10   5   25.58    4.96
  -4  10   5   18.60    3.97
  -4  10   6  493.13   17.70
   4  10   6  464.01   15.85
  -4  10   7   98.87    7.94
   4  10   7  109.99    7.33
  -4  10   8  845.55   23.90
  -4  10   9  280.70   12.84
   4  11 -12   97.24   11.73
  -4  11 -12  116.26   12.49
  -4  11 -11  157.14   13.88
   4  11 -11  140.71   13.29
   4  11 -10  109.77   11.51
  -4  11 -10  118.99   12.13
   4  11  -9  553.80   24.86
  -4  11  -9  548.91   24.98
  -4  11  -8  290.44   17.58
   4  11  -8  260.28   16.58
   4 -11  -7  769.67   22.97
  -4  11  -7  865.98   30.11
   4  11  -7  872.25   29.86
   4  11  -6   30.13    6.41
   4 -11  -6   24.83    4.45
  -4  11  -6   29.53    6.22
   4 -11  -5  216.14   11.68
  -4  11  -5  239.66   14.88
   4  11  -5  251.18   14.78
   4 -11  -4  100.64    8.24
  -4  11  -4  114.45   10.14
   4  11  -4  106.82    9.66
   4 -11  -3  463.63   17.76
  -4  11  -3  487.61   20.23
  -4  11  -2  194.30   12.55
  -4  11  -1  978.44   28.93
  -4  11   0  245.24   13.60
   4  11   1  975.85   27.21
  -4  11   1  930.02   24.14
  -4  11   1  966.84   27.78
  -4  11   2  188.24   11.59
   4  11   2  192.65   11.15
  -4  11   2  170.16    9.80
  -4  11   3  489.26   18.53
   4  11   3  501.60   17.82
  -4  11   3  470.39   17.49
   4  11   4  108.81    7.98
  -4  11   4   99.81    8.32
  -4  11   4  119.28    8.94
  -4  11   5  255.34   12.73
   4  11   5  231.60   11.25
   4  11   6   21.71    4.12
  -4  11   6   25.45    4.76
  -4  11   7  718.77   22.10
   4  11   7  793.48   20.65
  -4  11   8  257.85   12.47
  -4  11   9  547.69   18.33
   4  12 -11   81.59   10.57
  -4  12 -11  114.14   12.71
   4  12 -10   52.41    8.64
  -4  12 -10   59.18    8.86
  -4  12  -9   52.36    8.52
   4  12  -9   54.59    8.46
  -4  12  -8  163.16   13.59
   4  12  -8  160.73   13.36
   4  12  -7    7.46    4.75
   4 -12  -7    6.91    2.94
  -4  12  -7    8.86    4.66
   4  12  -6   10.41    4.72
   4 -12  -6   10.46    3.34
  -4  12  -6   15.28    5.30
   4  12  -5   40.28    6.87
   4 -12  -5   46.28    5.61
  -4  12  -5   50.42    7.91
   4 -12  -4   93.12    7.94
  -4  12  -4  105.35   10.14
   4  12  -4   98.99    9.62
   4  12  -3    6.57    3.39
  -4  12  -3    4.86    3.78
  -4  12  -2   46.73    6.80
  -4  12  -1  137.09   10.72
  -4  12   0  338.67   16.37
  -4  12   1  122.48    9.83
  -4  12   1  125.60    8.56
  -4  12   2   47.47    5.72
  -4  12   2   41.89    6.07
   4  12   2   47.21    5.78
  -4  12   3    8.18    3.37
  -4  12   3    9.94    3.19
   4  12   3    7.44    2.85
   4  12   4   89.63    7.52
  -4  12   4   89.79    7.95
   4  12   5   34.34    4.80
  -4  12   5   36.15    5.13
   4  12   6   10.98    3.26
  -4  12   6   13.86    3.67
  -4  12   7    6.74    3.17
  -4  12   8  132.21    8.88
  -4  12   9   54.92    5.80
  -4  13 -11  334.93   21.27
  -4  13 -10  239.18   17.36
   4  13 -10  245.08   17.39
  -4  13  -9  974.67   35.12
   4  13  -9  958.83   34.38
  -4  13  -8  335.19   19.59
   4  13  -8  329.45   19.23
  -4  13  -7  651.59   26.94
   4  13  -7  635.47   26.30
   4  13  -6   79.65    9.63
  -4  13  -6   82.43    9.53
   4  13  -5  335.48   18.21
   4 -13  -5  316.58   14.68
  -4  13  -5  404.52   20.08
  -4  13  -4  192.34   13.50
   4  13  -4  164.19   12.27
  -4  13  -3  534.80   22.18
   4  13  -3  510.27   21.34
  -4  13  -2  285.37   15.76
   4  13  -2  295.26   15.68
  -4  13  -1 1194.95   33.84
   4  13  -1 1226.61   33.04
   4  13   0  527.15   20.04
  -4  13   0  541.30   21.11
  -4  13   1 1189.34   30.22
  -4  13   1 1278.76   33.85
   4  13   2  289.14   14.06
  -4  13   2  261.87   13.30
  -4  13   2  292.75   14.85
  -4  13   3  533.70   20.03
   4  13   3  527.63   18.91
   4  13   4  176.86   10.45
  -4  13   4  171.35   10.99
   4  13   5  338.62   13.99
  -4  13   5  328.62   15.05
  -4  13   6   80.05    7.43
  -4  13   7  641.28   20.67
  -4  13   8  301.77   13.57
   4  14 -10   14.33    5.75
  -4  14 -10   25.11    6.86
   4  14  -9  106.67   11.56
  -4  14  -9  122.02   12.88
  -4  14  -8  160.98   13.94
   4  14  -8  151.34   13.73
   4  14  -7   60.92    9.18
  -4  14  -7   64.63    9.58
  -4  14  -6  194.30   14.61
   4  14  -6  207.09   14.67
   4  14  -5   21.30    6.42
  -4  14  -5   25.46    6.63
  -4  14  -4  159.43   13.14
   4  14  -4  162.43   12.58
   4  14  -3   56.94    7.92
  -4  14  -3   57.18    7.80
  -4  14  -2  111.31   10.42
   4  14  -2  101.14    9.57
  -4  14  -1  228.53   14.14
   4  14  -1  251.16   14.35
   4  14   0   80.05    8.05
  -4  14   0   91.22    9.17
  -4  14   1  249.83   14.23
   4  14   1  235.19   13.15
  -4  14   2  110.28    9.43
   4  14   2  103.49    8.58
  -4  14   3   53.97    6.87
   4  14   3   53.42    6.27
   4  14   3   54.37    6.24
  -4  14   4  170.22   11.05
   4  14   4  145.32    9.54
   4  14   4  156.97    9.77
  -4  14   5   25.17    4.75
   4  14   5   27.30    4.38
  -4  14   6  199.75   11.58
   4  14   6  192.50    9.92
  -4  14   7   64.00    6.46
   4  15  -9  284.57   19.13
  -4  15  -9  312.65   20.12
   4  15  -8   73.12   10.24
  -4  15  -8   75.83   10.29
  -4  15  -7  352.67   20.59
   4  15  -7  355.10   20.33
  -4  15  -6  168.51   14.04
   4  15  -6  142.83   12.69
   4  15  -5   56.84    8.34
  -4  15  -5   53.75    8.33
   4  15  -4   42.97    6.94
  -4  15  -4   55.96    8.39
  -4  15  -3  253.39   15.74
   4  15  -3  249.12   15.41
   4  15  -2   95.42    9.38
  -4  15  -2   95.36    9.79
  -4  15  -1  811.21   27.95
   4  15  -1  773.10   26.39
   4  15   0   42.06    6.29
  -4  15   0   35.09    6.16
  -4  15   1  788.31   26.86
   4  15   1  818.15   25.84
   4  15   2   92.52    8.24
  -4  15   2  100.09    9.36
  -4  15   3  255.48   14.05
   4  15   3  244.41   12.81
   4  15   4   54.43    6.14
  -4  15   4   72.61    7.68
  -4  15   5   63.45    6.99
   4  15   5   67.65    6.52
  -4  15   6  143.65    9.94
  -4  15   7  337.80   14.70
   4  16  -8  357.63   21.33
  -4  16  -8  315.35   20.30
   4  16  -7  199.98   15.77
  -4  16  -7  213.19   16.47
   4  16  -6  328.54   19.38
  -4  16  -6  317.16   19.53
   4  16  -5   49.02    8.28
  -4  16  -5   45.91    7.98
  -4  16  -4  255.00   16.68
   4  16  -4  234.25   15.51
   4  16  -3   80.57    9.15
  -4  16  -3   83.62    9.67
  -4  16  -2  601.17   24.83
   4  16  -2  570.05   23.38
  -4  16  -1  306.14   17.07
   4  16  -1  287.67   16.12
  -4  16   0 1196.75   35.00
   4  16   0 1172.67   33.34
  -4  16   1  303.93   16.52
   4  16   1  298.59   15.40
  -4  16   2  602.80   23.09
   4  16   2  608.37   21.65
  -4  16   3   74.35    8.16
   4  16   3   82.26    7.71
  -4  16   4  239.62   13.61
   4  16   4  235.17   12.26
  -4  16   5   46.21    6.18
  -4  16   6  303.27   14.58
   4  17  -7    5.85    4.94
  -4  17  -7    6.87    5.66
   4  17  -6   24.11    6.83
  -4  17  -6   21.82    6.28
   4  17  -5    0.15    4.52
  -4  17  -5   14.50    6.21
   4  17  -4   55.56    8.44
  -4  17  -4   47.55    8.24
   4  17  -3   25.65    6.25
  -4  17  -3   26.28    6.59
   4  17  -2   21.38    5.49
  -4  17  -2   25.91    6.31
  -4  17  -1   10.59    5.08
   4  17  -1   14.36    4.64
  -4  17   0   25.05    5.76
   4  17   0   31.09    6.19
   4  17   1    9.99    3.96
  -4  17   1    3.88    3.95
   4  17   2   21.42    4.93
  -4  17   2   16.82    5.03
   4  17   3   26.17    4.91
  -4  17   3   19.99    4.78
   4  17   4   43.67    5.65
  -4  17   4   50.20    6.55
  -4  17   5    6.40    3.68
   4  18  -6  285.08   18.87
  -4  18  -6  316.56   20.21
   4  18  -5  290.45   18.53
  -4  18  -5  264.58   18.25
   4  18  -4  116.92   11.70
  -4  18  -4  111.51   11.97
   4  18  -3  191.18   14.42
  -4  18  -3  213.49   15.65
  -4  18  -2  392.77   20.82
   4  18  -2  390.72   19.86
  -4  18  -1   46.50    7.66
   4  18  -1   45.84    7.24
   4  18   0  477.07   21.11
  -4  18   0  495.98   22.45
  -4  18   1   53.90    8.11
   4  18   1   39.53    6.33
  -4  18   2  422.73   19.82
   4  18   2  396.33   17.92
   4  18   3  208.17   12.44
  -4  18   3  218.35   13.93
  -4  18   4   97.72    9.23
   4  19  -5  155.98   14.21
  -4  19  -5  187.10   15.61
   4  19  -4   67.65    9.47
  -4  19  -4   86.92   10.66
   4  19  -3  123.25   12.15
  -4  19  -3  122.74   12.21
   4  19  -2   50.24    8.33
  -4  19  -2   37.12    7.34
   4  19  -1  153.27   12.53
  -4  19  -1  158.39   13.19
  -4  19   0    0.63    3.91
   4  19   0    3.67    4.06
   4  19   1  156.76   11.89
  -4  19   1  153.08   12.64
   4  19   2   46.92    6.37
  -4  19   2   56.24    8.00
  -4  19   3  108.48   10.06
   4  20  -4    3.40    4.50
   4  20  -3   29.30    7.08
  -4  20  -3   29.42    7.18
   4  20  -2  101.11   11.04
  -4  20  -2  103.58   11.32
  -4  20  -1   68.81    9.40
   4  20  -1   60.57    8.51
   4  20   0  227.80   15.23
  -4  20   0  212.53   15.26
  -4  20   1   61.77    8.79
   4  20   1   54.00    7.58
  -4  20   2  115.38   10.82
   4  21  -3  252.27   17.33
   4  21  -2   58.87    8.58
  -4  21  -2   77.17   10.56
   4  21  -1  299.28   18.07
  -4  21  -1  334.61   19.93
  -4  21   0   45.49    8.17
   4  21   0   40.20    7.44
  -4  21   1  295.95   18.12
   4  22  -2   24.80    6.12
  -4  22  -1    9.73    4.95
  -4  22   0    7.34    5.20
   5   0 -15    4.52    5.37
   5   0 -14    4.15    4.22
  -5   0 -14    5.78    4.62
   5   0 -13    6.36    5.44
  -5   0 -13   -1.74    3.87
   5   0 -13   12.29    6.13
  -5   0 -12    3.65    3.74
   5   0 -12    4.72    5.18
  -5   0 -11    0.21    3.55
   5   0 -11    6.68    5.02
  -5   0 -10    3.92    3.83
   5   0 -10    1.92    4.00
  -5   0  -9    0.94    3.22
   5   0  -9    2.58    4.24
  -5   0  -8   -0.66    3.43
   5   0  -8    0.32    3.06
   5   0  -7    2.71    3.46
  -5   0  -7    0.14    3.29
   5   0  -6    1.00    3.02
  -5   0  -6    5.11    3.85
   5   0  -5    3.88    3.21
  -5   0  -5    4.83    3.49
  -5   0  -4    0.80    3.30
  -5   0  -3    3.20    3.25
  -5   0  -2    3.32    3.48
  -5   0  -1   -0.74    3.23
   5   0   0    1.54    1.40
  -5   0   0    2.90    3.69
   5   0   1    1.90    0.84
  -5   0   1    4.29    3.84
  -5   0   2   -3.47    3.49
  -5   0   3   -0.88    3.57
  -5   0   4   -0.61    3.61
  -5   0   5   -2.19    3.66
  -5   0   6   10.05    4.08
  -5   0   7   -2.09    3.44
   5   1 -15  272.75   17.70
   5  -1 -14   40.39    7.24
   5   1 -14   38.62    7.05
  -5   1 -14   44.55    7.95
  -5  -1 -13  497.01   21.78
   5  -1 -13  470.66   24.36
   5  -1 -13  463.46   21.70
   5   1 -13  469.99   22.72
  -5   1 -13  492.16   22.48
   5   1 -13  500.16   25.15
   5  -1 -12   18.71    5.80
  -5   1 -12   36.62    6.66
  -5  -1 -12   27.06    5.52
   5   1 -12   31.52    7.16
   5   1 -12   20.42    6.01
  -5  -1 -11  764.32   26.51
   5  -1 -11  748.63   28.56
   5   1 -11  710.24   28.21
  -5   1 -11  727.94   26.79
  -5  -1 -10  157.10   11.49
   5  -1 -10  138.05   11.67
   5   1 -10  132.71   11.87
  -5   1 -10  139.05   11.09
   5  -1  -9  877.46   28.72
  -5  -1  -9  909.73   28.27
   5   1  -9  880.72   29.13
  -5   1  -9  861.21   28.35
  -5  -1  -8  102.61    9.06
   5  -1  -8  123.77   10.01
  -5   1  -8  112.63   10.04
  -5   1  -7  624.12   23.22
  -5  -1  -7  666.11   23.19
   5  -1  -7  664.48   22.52
  -5   1  -6  179.70   12.11
  -5  -1  -6  192.11   11.96
   5  -1  -6  180.72   10.74
  -5   1  -5  525.19   20.34
  -5  -1  -5  545.01   20.33
   5  -1  -5  540.65   18.00
  -5   1  -4   88.18    8.40
  -5  -1  -4  105.86    8.84
   5  -1  -4   98.98    7.06
  -5   1  -3 1337.28   34.58
  -5  -1  -3 1374.04   34.19
   5  -1  -3 1388.07   28.29
  -5  -1  -2   94.26    8.42
  -5   1  -2   80.24    7.90
   5  -1  -2   84.26    4.75
   5  -1  -1 1301.10   23.50
  -5   1  -1 1318.21   33.36
  -5  -1  -1 1297.43   33.04
  -5   1   0  134.58   10.08
   5  -1   0  163.89    5.23
  -5  -1   0  145.40   10.16
  -5   1   1 1270.73   32.73
  -5  -1   1 1268.27   32.67
  -5   1   2   94.31    8.56
  -5  -1   2   87.18    8.22
  -5   1   3 1327.89   33.94
  -5  -1   3 1333.49   34.09
  -5   1   4   92.04    8.46
  -5  -1   4  103.58    9.17
  -5  -1   5  538.34   20.84
  -5   1   5  528.35   20.26
  -5   1   6  198.49   12.35
  -5  -1   6  198.05   12.59
  -5   1   7  675.78   23.68
  -5  -1   7  678.64   24.08
   5   2 -15   36.07    7.51
  -5   2 -15   55.87    8.79
  -5   2 -14  196.96   14.83
   5  -2 -14  200.53   14.42
   5   2 -14  187.08   14.79
  -5   2 -13    6.49    4.38
  -5  -2 -13    2.46    3.60
   5  -2 -13   -3.69    5.22
   5   2 -13    6.17    5.25
   5   2 -13   13.13    5.81
   5  -2 -13   13.94    5.07
  -5  -2 -12  435.49   19.57
   5  -2 -12  425.68   22.35
   5   2 -12  412.79   22.06
  -5   2 -12  392.30   20.10
   5   2 -12  405.64   20.87
  -5   2 -11   21.07    5.83
   5  -2 -11   14.11    5.30
   5   2 -11   13.55    6.27
  -5  -2 -11   19.51    5.14
  -5  -2 -10  469.33   19.76
   5  -2 -10  487.87   21.88
  -5   2 -10  493.81   21.59
   5  -2  -9   98.25    9.63
  -5  -2  -9  106.35    9.22
  -5   2  -9   96.95    9.49
  -5  -2  -8  633.03   22.48
   5  -2  -8  579.93   22.03
  -5   2  -8  628.37   23.55
   5  -2  -7   78.01    7.77
  -5   2  -7   80.12    8.34
  -5  -2  -7   76.47    7.99
   5  -2  -6  564.07   19.48
  -5  -2  -6  564.53   20.85
  -5   2  -6  600.95   22.30
   5  -2  -5    6.42    2.83
  -5   2  -5    3.46    3.39
  -5  -2  -5   -1.98    3.09
  -5   2  -4  442.68   18.52
   5  -2  -4  446.54   15.01
  -5  -2  -4  433.12   17.81
   5  -2  -3   72.92    5.44
  -5   2  -3   72.33    7.82
  -5  -2  -3   73.41    7.44
  -5   2  -2 1169.57   31.46
   5  -2  -2 1156.70   23.25
  -5  -2  -2 1116.15   30.37
  -5   2  -1  113.89    9.22
  -5  -2  -1  134.47    9.66
   5  -2  -1  113.05    5.17
  -5   2   0  535.54   20.18
  -5  -2   0  590.67   20.78
  -5   2   1  130.88    9.78
  -5  -2   1   95.50    8.55
  -5   2   2 1081.41   29.76
  -5  -2   2 1055.80   29.66
  -5   2   3   61.09    7.18
  -5  -2   3   72.60    7.63
   5   2   4  420.59    9.25
  -5  -2   4  456.97   18.67
  -5   2   4  411.99   17.87
  -5   2   5    5.04    3.77
  -5  -2   5    1.63    3.31
  -5  -2   6  604.44   22.58
  -5   2   6  592.19   21.76
  -5   2   7   75.20    8.01
  -5   2   8  604.48   22.41
  -5   3 -15  167.89   14.40
   5   3 -15  186.62   15.21
   5  -3 -14   12.53    4.76
   5   3 -14   27.14    7.01
  -5   3 -14   16.53    6.15
   5  -3 -13  196.79   15.96
   5   3 -13  209.98   16.51
  -5   3 -13  191.65   14.75
   5  -3 -13  199.93   13.63
   5   3 -13  192.78   15.24
   5   3 -12    8.15    5.28
  -5   3 -12   10.57    4.73
   5   3 -12   14.38    5.89
  -5  -3 -12    7.96    3.57
   5  -3 -12    7.99    5.23
  -5   3 -11   29.82    6.94
  -5  -3 -11   42.06    6.17
   5  -3 -11   22.20    5.56
  -5   3 -10   18.12    5.53
  -5  -3 -10   20.19    5.22
   5  -3 -10   22.27    5.87
  -5   3  -9   25.06    5.66
  -5  -3  -9   24.54    4.99
   5  -3  -9   28.53    5.78
  -5   3  -8   82.19    9.05
   5  -3  -8   86.20    8.44
  -5  -3  -8   84.88    8.06
  -5  -3  -7  220.50   12.54
   5  -3  -7  205.82   12.14
  -5   3  -7  225.97   13.95
  -5  -3  -6  117.12    9.15
   5  -3  -6  128.33    9.11
  -5   3  -6  131.28   10.61
  -5  -3  -5  587.75   20.79
   5  -3  -5  581.03   18.74
  -5   3  -5  601.00   22.33
  -5   3  -4   24.09    5.30
  -5  -3  -4   22.99    4.76
   5  -3  -4   27.02    4.03
  -5   3  -3  224.19   13.16
  -5  -3  -3  245.24   13.06
   5  -3  -3  245.36   10.00
  -5   3  -2   44.30    6.25
  -5  -3  -2   47.39    6.21
  -5   3  -1  148.29   10.51
  -5  -3  -1  141.34   10.11
  -5  -3   0    9.70    4.19
  -5   3   0    6.12    3.70
  -5   3   1  130.88    9.83
  -5  -3   1  142.68   10.19
  -5  -3   2   42.10    6.19
  -5   3   2   48.17    6.51
  -5  -3   3  266.22   14.16
  -5   3   3  260.97   13.81
  -5   3   4   28.28    5.28
  -5  -3   4   26.63    5.47
   5   3   4   25.70    2.60
   5   3   5  590.91   13.80
  -5  -3   5  584.69   22.16
  -5   3   5  601.31   21.58
   5   3   6  111.66    5.70
  -5   3   6  106.51    9.19
  -5   3   7  203.38   12.65
  -5   3   8   81.12    8.27
  -5   4 -15   12.62    5.14
  -5   4 -14  571.07   26.19
   5   4 -14  517.99   25.39
   5   4 -13   19.93    6.64
  -5   4 -13   14.70    5.53
   5   4 -13   20.90    6.58
   5  -4 -13   11.65    5.68
  -5  -4 -12  681.32   23.74
   5  -4 -12  632.46   27.77
  -5   4 -12  662.48   27.20
   5   4 -12  593.41   26.19
  -5   4 -11   56.98    8.55
   5  -4 -11   35.50    7.57
  -5  -4 -11   58.37    7.05
   5   4 -11   62.61    8.82
  -5  -4 -10  537.59   20.46
   5  -4 -10  503.24   22.50
  -5   4 -10  528.82   23.35
  -5  -4  -9  198.37   12.04
   5  -4  -9  195.72   13.24
  -5   4  -9  189.65   13.48
  -5  -4  -8  574.24   20.88
   5  -4  -8  600.12   22.41
  -5   4  -8  622.12   24.16
  -5  -4  -7  142.19   10.07
   5  -4  -7  136.37    9.94
  -5   4  -7  150.67   11.67
  -5  -4  -6 1296.60   32.99
   5  -4  -6 1296.41   31.81
  -5   4  -6 1245.01   35.03
   5  -4  -5   27.30    4.43
  -5   4  -5   28.49    5.60
  -5  -4  -5   23.78    4.90
   5  -4  -4 1781.22   35.51
  -5  -4  -4 1730.12   39.46
  -5   4  -4 1755.42   41.90
  -5   4  -3  376.47   17.21
  -5  -4  -3  331.29   15.21
  -5   4  -2 1278.12   33.96
  -5  -4  -2 1300.23   32.84
  -5   4  -1  355.80   16.38
  -5  -4  -1  353.60   15.80
  -5   4   0  733.08   24.31
  -5  -4   0  737.77   23.83
  -5   4   1  357.46   16.49
  -5  -4   1  354.76   16.24
  -5  -4   2 1259.27   33.27
  -5   4   2 1315.34   33.67
  -5  -4   3  335.64   16.17
  -5   4   3  367.55   16.44
   5   4   3  335.88   15.37
  -5  -4   4 1673.91   40.61
  -5   4   4 1701.70   39.80
   5   4   4 1687.94   38.79
  -5   4   5   35.32    5.74
  -5  -4   5   26.27    5.76
   5   4   5   23.76    2.96
   5   4   6 1282.04   25.66
  -5   4   6 1300.76   33.89
  -5   4   7  142.69   10.50
   5   4   7  136.41    7.24
  -5   4   8  604.13   22.20
  -5   4   9  183.21   11.93
  -5   5 -14    8.86    5.51
   5   5 -14    2.68    4.99
  -5   5 -13   26.77    6.88
   5   5 -13   30.19    6.91
   5  -5 -13   38.90    7.77
   5   5 -12    9.92    5.30
  -5   5 -12   -1.31    4.33
   5  -5 -12   -1.14    4.53
   5   5 -11   80.41    9.62
  -5   5 -11   86.70   10.01
  -5  -5 -11   78.02    7.87
   5  -5 -11   81.33    9.98
  -5   5 -10    6.92    4.78
   5  -5 -10   10.11    4.73
  -5  -5 -10    9.17    3.82
  -5   5  -9  107.99   10.73
  -5  -5  -9  129.18    9.73
   5  -5  -9  119.77   10.46
  -5   5  -8   72.56    8.79
   5  -5  -8   67.79    7.73
  -5  -5  -8   69.65    7.18
  -5   5  -7   91.65    9.39
   5  -5  -7   83.31    8.04
  -5  -5  -7   74.12    7.38
  -5   5  -6   58.26    7.78
   5  -5  -6   48.93    6.12
  -5  -5  -6   52.61    6.32
  -5   5  -5   11.73    4.44
  -5  -5  -5   23.33    4.57
  -5  -5  -4   41.48    5.81
  -5   5  -4   28.09    5.87
  -5  -5  -3  172.83   10.90
  -5   5  -3  170.78   11.69
  -5  -5  -2   20.83    4.28
  -5   5  -2   31.82    6.09
  -5   5  -1  274.34   14.40
  -5  -5  -1  235.58   12.99
  -5   5   0  149.03   10.76
  -5  -5   0  168.24   11.01
  -5  -5   1  250.26   13.64
  -5   5   1  249.87   13.82
  -5  -5   2   32.62    5.57
  -5   5   2   20.37    4.68
  -5  -5   3  167.49   11.67
  -5   5   3  179.90   11.56
   5   5   4   34.20    5.48
  -5  -5   4   24.52    5.21
  -5   5   4   26.57    5.14
  -5   5   5   16.77    4.95
   5   5   5   20.39    3.03
   5   5   5   23.43    4.65
  -5   5   6   54.17    6.75
   5   5   6   49.57    4.72
   5   5   6   49.16    6.07
   5   5   7   78.70    6.00
  -5   5   7   59.10    7.04
  -5   5   8   60.20    7.10
   5   5   8   66.63    5.81
  -5   5   9  117.97    9.93
  -5   6 -14  441.88   23.89
  -5   6 -13   12.23    4.97
   5   6 -13   10.15    5.48
  -5   6 -12  333.25   20.05
   5   6 -12  341.68   20.13
   5   6 -11   54.85    8.49
  -5   6 -11   80.62    9.79
  -5  -6 -11   70.37    7.20
  -5  -6 -10  400.55   16.89
   5   6 -10  390.12   20.61
  -5   6 -10  392.76   20.84
  -5   6  -9   44.65    7.43
  -5  -6  -9   36.40    5.51
  -5  -6  -8  450.80   17.74
  -5   6  -8  442.61   20.93
  -5  -6  -7  136.17    9.69
  -5   6  -7  132.38   11.68
  -5  -6  -6  793.23   24.32
  -5   6  -6  801.49   27.97
  -5  -6  -5   19.99    4.66
  -5   6  -5   15.54    5.06
  -5  -6  -4  935.74   26.95
  -5   6  -4  935.87   29.52
  -5  -6  -3  182.85   11.47
  -5   6  -3  192.66   12.60
  -5   6  -2  496.66   20.29
  -5  -6  -2  469.35   18.39
  -5   6  -1   97.64    8.93
  -5  -6  -1   85.41    8.10
  -5  -6   0  210.54   12.47
  -5   6   0  228.86   13.28
  -5   6   1   93.18    8.66
  -5  -6   1   80.66    7.84
  -5  -6   2  465.74   19.42
  -5   6   2  521.85   20.13
  -5   6   3  194.34   12.09
  -5  -6   3  164.53   11.46
  -5   6   4  925.88   27.85
   5   6   4  971.41   27.45
   5   6   5   12.25    4.09
  -5   6   5   22.65    5.19
   5   6   6  767.90   23.83
  -5   6   6  810.75   25.58
   5   6   6  769.69   20.69
   5   6   7  116.18    7.66
   5   6   7  124.00    9.26
  -5   6   7  133.37   10.25
  -5   6   8  426.56   18.29
   5   6   8  422.02   17.15
   5   6   8  409.45   15.29
  -5   6   9   26.90    5.30
  -5   7 -13  681.67   29.44
   5   7 -13  587.13   27.84
  -5   7 -12   31.76    7.16
   5   7 -12   31.10    6.87
  -5   7 -11  381.40   21.10
   5   7 -11  369.19   20.80
   5   7 -10   11.87    4.82
  -5  -7 -10    1.25    2.83
  -5   7 -10    7.79    5.09
   5   7  -9  385.95   19.99
  -5  -7  -9  313.01   14.53
  -5   7  -9  360.80   19.56
  -5   7  -8   43.23    7.57
  -5  -7  -8   45.55    5.76
  -5  -7  -7  678.07   22.01
  -5   7  -7  627.84   25.22
  -5   7  -6   49.72    7.52
  -5  -7  -6   48.58    6.06
  -5  -7  -5 1407.53   34.60
  -5   7  -5 1527.20   39.92
  -5   7  -4   15.35    4.86
  -5  -7  -4   15.01    3.99
  -5  -7  -3  739.81   23.71
  -5   7  -3  828.77   27.22
  -5   7  -2   74.39    8.55
  -5  -7  -2   85.09    7.86
  -5   7  -1  353.58   16.96
  -5  -7  -1  333.96   15.67
  -5   7   0   10.82    3.97
  -5  -7   0   20.06    4.87
  -5   7   1  338.72   16.34
  -5  -7   1  333.08   16.10
  -5   7   2   88.68    8.57
  -5  -7   2   78.56    8.30
  -5   7   3  779.00   25.32
  -5   7   4   13.84    4.46
  -5   7   5 1451.86   36.27
   5   7   5 1432.11   34.75
  -5   7   6   51.90    6.70
   5   7   6   49.79    5.44
   5   7   6   38.20    5.31
   5   7   7  609.42   19.45
   5   7   7  631.02   21.10
  -5   7   7  665.33   22.96
   5   7   8   47.60    5.50
  -5   7   8   53.37    6.68
   5   7   8   44.74    5.99
  -5   7   9  311.33   15.53
   5   8 -12   23.87    6.42
  -5   8 -12   14.86    5.75
   5   8 -11   16.97    6.33
  -5   8 -11   14.08    5.44
   5   8 -10   78.94   10.11
  -5  -8 -10   70.86    6.80
  -5   8 -10   65.67    9.46
  -5   8  -9   41.59    7.67
   5   8  -9   47.29    7.95
  -5  -8  -9   44.51    5.50
  -5  -8  -8  147.07    9.83
  -5   8  -8  174.82   13.58
  -5   8  -7    0.21    4.26
  -5  -8  -7    7.36    3.16
  -5   8  -6   28.60    6.28
  -5  -8  -6   30.82    4.84
  -5   8  -5   29.48    6.38
  -5  -8  -5   25.60    4.65
  -5   8  -4   16.59    4.98
  -5  -8  -4   19.18    4.41
  -5   8  -3   50.24    7.13
  -5  -8  -3   42.17    5.95
  -5  -8  -2  129.26    9.89
  -5   8  -2  129.02   10.86
  -5   8  -1   28.04    5.44
  -5  -8  -1   28.87    5.25
  -5   8   0   41.58    6.51
  -5  -8   0   40.58    6.14
  -5   8   1   34.02    5.73
  -5  -8   1   29.78    5.85
  -5   8   2  130.01   10.19
  -5   8   3   42.90    6.35
  -5   8   4    4.44    3.24
   5   8   5   25.90    4.59
  -5   8   5   31.67    5.74
  -5   8   6   34.97    5.71
   5   8   6   43.05    5.65
  -5   8   7    4.89    3.19
   5   8   7    3.56    2.60
   5   8   7   -1.81    3.04
  -5   8   8  163.87   11.23
  -5   8   9   50.93    6.67
  -5   8  10   79.90    8.12
  -5   9 -12   87.63   10.96
  -5   9 -11  475.53   24.39
   5   9 -11  450.09   23.74
   5   9 -10   53.85    8.72
  -5   9 -10   38.40    7.17
  -5   9  -9  300.21   18.49
  -5  -9  -9  312.10   13.98
   5   9  -9  288.65   18.01
  -5   9  -8  114.91   11.55
  -5  -9  -8   95.80    7.97
   5   9  -8  108.35   11.24
  -5   9  -7  723.02   28.14
  -5  -9  -7  733.81   22.73
  -5  -9  -6  128.85    9.13
  -5   9  -6  126.75   11.28
  -5  -9  -5 1089.36   29.43
  -5   9  -5 1147.94   35.05
  -5  -9  -4  119.59    9.24
  -5   9  -4  128.75    4.38
  -5   9  -4  150.80   12.24
  -5   9  -3 1299.39   21.63
  -5  -9  -3 1274.85   32.91
  -5   9  -3 1392.87   37.67
  -5  -9  -2  132.78   10.02
  -5   9  -2  147.71   11.71
  -5   9  -2  138.06    5.68
  -5  -9  -1  691.69   23.58
  -5   9  -1  705.63   16.10
  -5   9  -1  724.64   25.65
  -5   9   0  275.48   15.25
  -5   9   0  277.42   10.00
  -5   9   1  743.62   25.58
  -5   9   2  153.79   11.18
  -5   9   3 1328.81   35.13
  -5   9   4  141.42   10.76
  -5   9   5 1095.67   31.01
   5   9   5 1104.91   29.75
  -5   9   6  130.36   10.18
   5   9   6  120.21    9.11
   5   9   7  684.02   22.06
  -5   9   7  729.17   24.42
  -5   9   8  104.67    9.15
  -5   9   9  324.53   15.81
  -5   9  10   49.23    6.54
   5  10 -11    9.13    6.01
  -5  10 -11    1.76    4.48
   5  10 -10   61.81    9.28
  -5  10 -10   73.19   10.26
   5  10  -9    9.50    5.26
  -5  10  -9    3.61    4.25
  -5 -10  -8  175.01   10.37
  -5  10  -8  214.50   15.82
   5  10  -8  203.43   15.22
  -5  10  -7   35.29    7.02
  -5 -10  -7   29.05    4.70
   5  10  -7   28.13    5.89
  -5 -10  -6  290.01   13.86
  -5  10  -6  321.92   18.22
  -5  10  -5   25.69    6.31
  -5 -10  -5   17.34    4.04
  -5 -10  -4  591.14   20.79
  -5  10  -4  619.82   24.90
  -5  10  -3   80.96    9.18
  -5  10  -3   79.56    4.57
  -5 -10  -3   73.15    7.46
  -5  10  -2  435.07   20.04
  -5  10  -2  448.26   12.27
  -5  10  -1   12.48    4.56
  -5  10  -1   13.14    2.54
  -5  10   0  167.51   12.04
  -5  10   0  163.40    8.10
  -5  10   1    9.45    4.32
  -5  10   1   14.55    3.27
  -5  10   2  480.59   20.07
  -5  10   2  460.27   15.87
  -5  10   3   86.13    8.54
  -5  10   4  635.18   23.01
  -5  10   5   22.01    5.03
  -5  10   6  299.98   15.14
   5  10   6  297.34   14.28
  -5  10   7   34.22    5.88
  -5  10   8  186.37   11.95
  -5  10   9    9.71    3.95
  -5  10  10   54.38    6.64
   5  11 -10   33.68    7.54
  -5  11 -10   40.37    7.96
  -5  11  -9  414.61   22.76
   5  11  -9  403.40   22.14
   5  11  -8   15.84    5.62
  -5 -11  -8   15.62    3.61
  -5  11  -8   11.57    5.10
  -5 -11  -7  132.23    9.15
  -5  11  -7  129.99   12.36
   5  11  -7  126.24   12.10
  -5  11  -6    6.62    4.78
  -5 -11  -6    4.80    3.39
   5  11  -6    9.87    4.96
  -5  11  -5   74.22    9.80
  -5  11  -4   33.54    6.84
  -5  11  -3  278.84   16.59
  -5  11  -2    6.26    4.69
  -5  11  -2   15.98    2.76
  -5  11  -1  387.94   12.84
  -5  11  -1  394.92   19.11
  -5  11   0  169.77    8.77
  -5  11   0  186.87   12.88
  -5  11   1  363.70   13.78
  -5  11   1  386.21   18.37
  -5  11   2    6.47    4.41
  -5  11   2   12.79    3.38
  -5  11   3  273.26   15.08
  -5  11   3  248.57   12.46
  -5  11   4   33.80    5.35
  -5  11   4   28.50    5.48
  -5  11   5   82.32    8.44
  -5  11   6   -0.03    3.55
  -5  11   7  154.76   11.07
  -5  11   8   14.31    4.24
  -5  11   9  358.54   16.46
   5  12  -9   71.13    9.72
  -5  12  -9   67.17    9.84
  -5  12  -8  562.62   26.37
   5  12  -8  545.70   25.99
   5  12  -7   47.51    8.22
  -5  12  -7   32.50    7.02
  -5  12  -6  659.28   27.57
   5  12  -6  647.78   27.11
  -5  12  -5   45.30    7.89
   5  12  -5   30.92    7.01
  -5  12  -4  697.86   27.54
  -5  12  -3   16.57    5.39
  -5  12  -2  867.58   30.01
  -5  12  -1   60.74    8.25
  -5  12  -1   61.20    5.48
  -5  12   0  891.87   23.07
  -5  12   0  913.56   29.92
  -5  12   1   61.71    7.85
  -5  12   1   64.38    6.23
  -5  12   2  746.41   22.53
  -5  12   2  845.70   27.83
  -5  12   3   14.92    4.39
  -5  12   3    8.39    3.48
  -5  12   4  671.30   24.24
  -5  12   5   46.71    6.66
  -5  12   6  650.64   23.40
  -5  12   7   36.59    5.93
  -5  12   8  504.67   19.96
   5  13  -9   43.66    8.54
  -5  13  -9   37.95    8.11
   5  13  -8   28.38    7.66
  -5  13  -8   42.21    8.26
   5  13  -7   31.79    7.30
  -5  13  -7   24.27    6.78
   5  13  -6   43.88    7.67
  -5  13  -6   38.00    7.94
   5  13  -5   51.02    7.98
  -5  13  -5   45.92    7.93
   5  13  -4   47.46    7.70
  -5  13  -4   39.88    7.72
  -5  13  -3   22.98    6.58
   5  13  -3   17.84    5.79
  -5  13  -2   31.82    6.33
  -5  13  -1   31.25    6.57
  -5  13   0   42.70    6.89
  -5  13   1   16.19    4.94
  -5  13   2   39.90    6.69
  -5  13   3   12.95    4.76
  -5  13   4   37.03    6.21
  -5  13   5   37.50    6.07
  -5  13   6   34.71    5.95
  -5  13   7   25.30    5.10
  -5  13   8   31.37    5.45
  -5  14  -8  305.54   20.24
   5  14  -8  308.47   19.78
   5  14  -7   78.00   10.12
  -5  14  -7   99.44   11.68
  -5  14  -6  591.62   26.98
   5  14  -6  513.77   25.20
  -5  14  -5   51.50    8.32
   5  14  -5   41.57    7.68
  -5  14  -4  588.91   26.13
   5  14  -4  564.92   25.14
   5  14  -3   94.52   10.34
  -5  14  -3   86.39   10.36
  -5  14  -2  628.64   26.15
   5  14  -2  620.17   24.99
  -5  14  -1  133.70   11.95
   5  14  -1  129.23   11.43
  -5  14   0  691.41   26.69
  -5  14   1  135.54   11.76
  -5  14   2  622.12   24.45
  -5  14   3   81.11    8.97
  -5  14   4  564.83   22.73
  -5  14   5   51.89    7.49
  -5  14   6  548.41   21.63
  -5  14   7   80.85    8.32
  -5  15  -7  186.36   15.93
   5  15  -7  216.66   16.85
   5  15  -6   52.57    9.18
  -5  15  -6   55.24    9.20
  -5  15  -5  218.22   16.59
   5  15  -5  218.37   15.98
  -5  15  -4   17.53    5.86
   5  15  -4   29.25    6.89
  -5  15  -3  487.04   23.60
   5  15  -3  513.34   23.48
   5  15  -2   38.99    7.61
  -5  15  -2   50.25    8.45
  -5  15  -1  581.81   25.14
   5  15  -1  541.68   23.19
   5  15   0   19.99    5.52
  -5  15   0   16.22    5.17
   5  15   1  561.56   22.59
  -5  15   1  587.76   24.59
  -5  15   2   65.69    8.24
   5  15   2   49.11    6.92
  -5  15   3  508.98   22.13
   5  15   3  474.97   19.75
  -5  15   4   23.48    5.62
  -5  15   5  176.91   12.42
  -5  15   6   49.84    7.03
  -5  16  -6  148.25   14.53
   5  16  -6  150.24   13.79
   5  16  -5   17.81    6.29
  -5  16  -5   31.88    7.19
  -5  16  -4  168.41   14.50
   5  16  -4  159.32   13.80
   5  16  -3   10.44    5.85
  -5  16  -3    3.17    4.58
   5  16  -2   54.34    8.44
  -5  16  -2   57.68    8.80
   5  16  -1   81.92    9.75
  -5  16  -1   61.20    8.89
   5  16   0    8.25    4.56
  -5  16   0   -0.77    4.13
   5  16   1   69.25    8.43
  -5  16   1   76.31    9.41
   5  16   2   52.37    7.26
  -5  16   2   43.19    7.31
   5  16   3   11.06    4.45
  -5  16   3   12.46    5.18
  -5  16   4  199.30   13.72
   5  16   4  170.71   11.59
  -5  16   5   14.26    4.93
  -5  17  -5  802.85   32.89
   5  17  -5  745.25   31.02
  -5  17  -4   11.37    5.95
   5  17  -4    6.78    4.77
  -5  17  -3  551.22   26.04
   5  17  -3  497.42   24.28
   5  17  -2   36.34    7.11
  -5  17  -2   47.01    8.66
  -5  17  -1  403.35   21.43
   5  17  -1  352.95   19.36
   5  17   0   84.18    9.65
  -5  17   0  105.24   11.20
   5  17   1  358.46   18.47
  -5  17   1  373.69   20.03
   5  17   2   43.29    7.32
  -5  17   2   41.56    7.50
  -5  17   3  539.75   23.44
   5  17   3  552.96   21.94
  -5  17   4    9.78    5.34
  -5  17   5  715.99   26.32
   5  18  -4   79.22   10.40
  -5  18  -3   18.06    6.51
   5  18  -3    8.06    4.88
  -5  18  -2   75.98   10.02
   5  18  -2   96.33   11.06
   5  18  -1    6.19    4.94
  -5  18  -1    0.37    4.41
  -5  18   0  195.32   14.96
   5  18   0  176.98   13.63
   5  18   1    0.78    4.09
  -5  18   1    8.50    4.43
   5  18   2   89.15    9.47
  -5  18   2   85.41    9.83
  -5  18   3   24.43    6.41
  -5  18   4   56.13    8.31
   5  19  -3  288.39   19.02
  -5  19  -2   85.01   11.35
   5  19  -2   64.68    9.34
   5  19  -1   80.23   10.05
  -5  19  -1   83.98   10.50
   5  19   0    2.83    4.49
  -5  19   0    9.84    5.31
   5  19   1   59.06    8.53
  -5  19   1   59.88    8.70
  -5  19   2   75.96    9.83
  -5  19   3  276.40   17.16
   5  20  -2  225.68   16.55
  -5  20  -1   41.83    8.77
   5  20  -1   35.40    7.30
   5  20   0   73.09    9.65
  -5  20   0   81.56   10.61
  -5  20   1   44.69    8.09
  -5  20   2  269.24   17.58
   6   0 -14  258.03   17.98
  -6   0 -13  346.98   20.62
   6   0 -13  317.88   19.41
  -6   0 -12  206.91   15.19
   6   0 -12  184.41   15.30
   6   0 -11  674.41   28.19
  -6   0 -11  732.19   28.70
   6   0 -10  195.81   14.40
  -6   0 -10  198.81   14.58
  -6   0  -9  216.87   14.95
   6   0  -9  283.99   16.56
  -6   0  -8  511.25   22.68
   6   0  -8  513.73   21.35
  -6   0  -7  163.92   12.64
   6   0  -7  154.67   11.11
  -6   0  -6  745.49   26.94
   6   0  -6  759.74   24.03
  -6   0  -5  646.20   24.91
   6   0  -5  676.97   21.35
  -6   0  -4  671.80   25.12
   6   0  -4  705.41   20.46
  -6   0  -3  501.38   21.30
   6   0  -3  518.60   16.07
  -6   0  -2  201.67   13.37
   6   0  -2  218.93    9.15
   6   0  -1  642.48   15.12
  -6   0  -1  641.52   24.11
   6   0   0   75.37    3.73
  -6   0   0   74.59    8.33
  -6   0   1  608.69   23.64
  -6   0   2  187.37   12.95
  -6   0   3  476.82   20.81
  -6   0   4  697.56   25.96
  -6   0   5  578.99   23.38
  -6   0   6  745.25   27.40
  -6   0   7  163.45   12.70
   6  -1 -14    4.96    5.41
  -6   1 -13   35.15    7.29
  -6  -1 -13   44.68    7.97
   6   1 -13   37.98    7.78
   6  -1 -12  115.56   12.13
  -6   1 -12  111.00   11.53
  -6  -1 -12  119.63   11.55
   6   1 -12  115.24   12.41
   6  -1 -11    3.05    4.91
  -6   1 -11    8.88    4.89
  -6  -1 -11   12.12    5.35
   6   1 -11    5.82    5.17
   6  -1 -10   97.01   10.57
  -6   1 -10   92.95   10.29
  -6  -1 -10   76.94    9.53
   6   1 -10   80.91    9.66
  -6   1  -9   96.27   10.13
   6   1  -9   69.56    8.60
  -6  -1  -9   75.97    9.02
   6  -1  -9   72.36    8.46
   6   1  -8   53.00    7.31
  -6   1  -8   63.64    8.53
  -6  -1  -8   45.08    7.28
   6  -1  -8   51.75    7.14
   6  -1  -7  100.34    8.98
  -6   1  -7  102.43   10.25
  -6  -1  -7   96.93    9.85
   6   1  -7  112.42    9.49
  -6   1  -6   65.05    8.48
  -6  -1  -6   79.36    8.99
   6   1  -6   88.46    8.13
   6  -1  -6   67.34    7.03
   6  -1  -5  168.77   10.14
  -6   1  -5  207.76   13.91
  -6  -1  -5  172.56   12.50
   6  -1  -4  197.48   10.12
  -6   1  -4  206.46   14.04
  -6  -1  -4  192.19   12.99
   6  -1  -3   55.71    5.09
  -6   1  -3   59.52    7.91
  -6  -1  -3   58.11    7.94
   6  -1  -2   66.01    4.98
  -6   1  -2   54.51    7.64
  -6  -1  -2   63.12    7.99
  -6   1  -1   13.45    4.68
  -6  -1  -1    9.24    3.92
   6  -1  -1   12.74    2.11
  -6  -1   0   36.35    6.43
  -6   1   0   38.21    6.61
  -6  -1   1   15.67    4.55
   6   1   1   16.63    1.69
  -6   1   1   13.91    4.42
  -6   1   2   54.76    7.40
  -6  -1   2   51.26    7.55
  -6   1   3   58.32    7.99
  -6  -1   3   53.35    7.74
  -6   1   4  202.63   13.77
  -6  -1   4  217.69   14.09
  -6  -1   5  192.60   13.49
  -6   1   5  167.19   12.63
  -6   1   6   80.03    9.32
  -6  -1   6   85.13    9.32
  -6   1   7   97.50    9.95
  -6  -1   7  104.97   10.45
  -6   1   8   50.20    7.46
  -6   2 -14  129.01   13.29
  -6   2 -13  309.43   19.49
   6   2 -13  317.09   19.89
  -6   2 -12  150.69   13.57
  -6  -2 -12  163.37   13.21
   6  -2 -12  136.10   13.24
   6   2 -12  171.29   14.81
  -6   2 -11  238.93   16.50
  -6  -2 -11  264.68   16.30
   6  -2 -11  240.01   16.70
   6   2 -11  256.88   17.35
  -6   2 -10  130.89   12.14
   6  -2 -10  114.23   11.11
  -6  -2 -10  102.63   10.35
   6   2 -10  113.33   11.26
   6   2  -9    7.45    4.05
  -6   2  -9   12.17    5.36
   6  -2  -9   17.58    5.41
  -6  -2  -9    6.69    4.40
  -6   2  -8  195.51   14.35
  -6  -2  -8  211.02   14.05
   6  -2  -8  194.18   12.88
   6  -2  -7   95.71    8.79
  -6   2  -7   96.23   10.03
  -6  -2  -7   97.35    9.73
  -6   2  -6  175.78   13.35
  -6  -2  -6  190.43   13.09
   6  -2  -6  173.20   10.95
  -6   2  -5  556.86   23.25
  -6  -2  -5  530.52   22.03
   6  -2  -5  549.33   18.68
  -6   2  -4  200.78   13.80
  -6  -2  -4  172.79   12.42
   6  -2  -4  171.74    9.35
  -6   2  -3 1003.19   31.70
  -6  -2  -3  948.43   30.17
   6  -2  -3  996.19   23.14
  -6   2  -2  411.98   19.59
  -6  -2  -2  408.49   18.87
   6  -2  -2  415.75   12.35
  -6  -2  -1   38.06    6.24
  -6   2  -1   29.10    6.41
  -6   2   0  331.55   17.44
  -6  -2   0  331.60   17.01
  -6  -2   1   30.05    6.20
  -6   2   1   26.05    5.48
  -6   2   2  404.06   19.04
  -6  -2   2  378.88   18.35
  -6   2   3  966.19   30.89
  -6  -2   3  938.00   30.40
  -6  -2   4  187.94   13.33
  -6   2   4  188.75   13.31
  -6  -2   5  561.38   23.21
  -6   2   5  525.37   22.18
  -6  -2   6  188.52   13.81
  -6   2   6  183.30   13.04
  -6   2   7   87.13    9.59
  -6   2   8  201.72   14.15
  -6   3 -13  211.26   16.27
  -6  -3 -12  352.95   18.73
   6  -3 -12  324.25   20.10
   6   3 -12  309.13   19.90
   6   3 -12  344.36   20.57
  -6   3 -12  341.93   20.55
   6  -3 -11  106.56   11.73
  -6  -3 -11  122.33   11.03
   6   3 -11  109.02   11.67
  -6   3 -11  129.92   12.76
  -6  -3 -10  167.49   12.67
   6  -3 -10  162.62   13.12
  -6   3 -10  166.26   13.87
  -6   3  -9  148.46   12.76
  -6  -3  -9  143.92   11.63
   6  -3  -9  123.99   10.95
  -6   3  -8  186.59   14.08
  -6  -3  -8  191.91   13.12
   6  -3  -8  196.78   12.88
  -6   3  -7  356.46   19.03
  -6  -3  -7  309.26   16.68
   6  -3  -7  310.72   15.52
  -6   3  -6  478.43   21.89
  -6  -3  -6  517.52   21.74
   6  -3  -6  525.36   19.24
  -6   3  -5  491.73   22.17
  -6  -3  -5  502.31   21.17
   6  -3  -5  479.33   17.36
  -6   3  -4 1175.84   35.12
  -6  -3  -4 1120.79   33.26
   6  -3  -4 1189.88   27.66
  -6   3  -3  934.88   30.57
  -6  -3  -3  862.20   28.25
  -6   3  -2  537.21   22.39
  -6  -3  -2  518.95   21.35
  -6   3  -1  204.89   14.02
  -6  -3  -1  205.19   13.42
  -6   3   0  287.54   15.96
  -6  -3   0  272.46   15.51
  -6   3   1  200.33   13.73
  -6  -3   1  192.89   13.10
  -6   3   2  489.54   21.27
  -6  -3   2  473.71   20.91
  -6  -3   3  862.25   29.00
  -6   3   3  877.28   28.98
   6   3   4 1104.20   18.67
  -6  -3   4 1184.80   34.85
  -6   3   4 1150.79   33.90
  -6  -3   5  499.83   21.93
  -6   3   5  487.18   21.21
  -6  -3   6  526.21   23.08
  -6   3   6  545.91   22.71
  -6   3   7  340.55   18.03
  -6   3   8  190.55   13.49
  -6   3   9  143.08   12.05
  -6   4 -13   21.34    7.00
  -6   4 -12   47.97    8.61
   6   4 -12   44.73    8.77
   6  -4 -12   20.08    5.99
   6   4 -12   44.39    8.21
   6  -4 -11    5.32    4.78
  -6   4 -11    1.03    5.02
  -6  -4 -11   -5.41    4.27
  -6   4 -10  125.92   12.50
  -6  -4 -10  137.45   11.47
   6  -4 -10   97.44   10.62
  -6   4  -9   24.11    6.67
  -6  -4  -9   16.09    4.48
   6  -4  -9   26.14    5.88
   6  -4  -8   18.64    4.67
  -6   4  -8   25.90    6.16
  -6  -4  -8   17.20    4.93
  -6   4  -7   24.06    5.87
   6  -4  -7   20.36    4.75
  -6  -4  -7   30.61    5.96
   6  -4  -6   32.94    5.32
  -6   4  -6   42.72    7.59
  -6  -4  -6   35.52    6.45
  -6   4  -5  136.60   11.93
  -6  -4  -5  136.27   10.90
  -6  -4  -4   68.22    7.98
  -6   4  -4   81.71    9.60
  -6  -4  -3   80.75    8.80
  -6   4  -3   86.01    9.28
  -6  -4  -2   19.88    5.32
  -6   4  -2   30.48    6.62
  -6  -4  -1   32.41    6.04
  -6   4  -1   30.59    6.53
  -6  -4   0   81.74    9.12
  -6   4   0   91.17    9.66
  -6  -4   1   30.60    6.33
  -6   4   1   32.28    6.15
  -6  -4   2   17.48    5.31
  -6   4   2   31.96    6.31
  -6  -4   3   90.46    9.55
  -6   4   3   84.13    8.89
  -6   4   4   56.00    7.93
  -6  -4   4   79.33    9.20
   6   4   4   62.12    4.07
  -6  -4   5  119.52   11.05
  -6   4   5  125.14   10.74
  -6   4   6   33.06    6.31
  -6   4   7   24.20    5.58
  -6   4   8   34.23    6.72
  -6   4   9   27.42    6.17
   6  -5 -12  323.79   19.98
  -6   5 -12  340.35   20.99
   6  -5 -11  428.00   22.52
  -6  -5 -11  474.68   20.95
  -6   5 -11  461.82   23.89
  -6   5 -10  109.59   11.64
  -6  -5 -10  118.26   10.49
   6  -5 -10  109.99   11.08
   6  -5  -9  293.51   16.72
  -6  -5  -9  281.85   15.96
  -6   5  -9  319.22   19.24
  -6  -5  -8  182.53   12.75
  -6   5  -8  193.00   14.66
  -6  -5  -7  243.92   14.54
  -6   5  -7  247.53   16.20
  -6   5  -6  623.53   25.62
  -6  -5  -6  564.78   22.43
  -6   5  -5  300.06   17.44
  -6  -5  -5  252.06   14.76
  -6   5  -4 1064.76   33.65
  -6  -5  -4  969.91   30.49
  -6   5  -3  342.22   18.12
  -6  -5  -3  322.55   16.75
  -6   5  -2  595.07   24.26
  -6  -5  -2  579.31   22.88
  -6   5  -1  792.30   27.85
  -6  -5  -1  729.62   26.04
  -6  -5   0   81.59    8.79
  -6   5   0   89.76    9.58
  -6  -5   1  722.03   25.99
  -6   5   1  750.04   26.72
  -6  -5   2  618.72   24.13
  -6   5   2  604.90   24.03
  -6  -5   3  316.89   17.29
  -6   5   3  305.51   16.87
  -6  -5   4  985.97   32.31
  -6   5   4 1028.38   32.03
  -6   5   5  283.67   16.11
  -6   5   6  580.74   23.56
  -6   5   7  225.02   14.55
  -6   5   8  182.86   13.24
  -6   5   9  266.66   16.11
  -6   6 -11   64.91    9.62
   6   6 -11   53.77    8.95
  -6  -6 -10  200.22   13.12
  -6   6 -10  213.29   16.15
  -6   6  -9   51.96    8.87
  -6  -6  -9   41.74    6.42
  -6  -6  -8   69.82    8.06
  -6   6  -8   77.13    9.96
  -6  -6  -7   35.52    6.13
  -6   6  -7   48.67    8.43
  -6  -6  -6   58.71    7.44
  -6   6  -6   69.81    9.42
  -6   6  -5  306.33   17.81
  -6  -6  -5  266.01   15.19
  -6   6  -4  139.54   12.07
  -6  -6  -4  123.04   10.46
  -6   6  -3  199.36   14.16
  -6  -6  -3  193.64   12.93
  -6   6  -2  209.61   14.52
  -6  -6  -2  209.01   13.54
  -6   6  -1  100.99   10.18
  -6  -6  -1  109.22    9.84
  -6  -6   0  336.91   17.29
  -6   6   0  346.53   18.04
  -6  -6   1  109.32   10.33
  -6   6   1  106.81   10.20
  -6  -6   2  199.51   13.83
  -6   6   2  208.24   13.96
  -6  -6   3  192.92   13.74
  -6   6   3  213.25   14.00
  -6   6   4  138.90   11.32
  -6   6   5  272.90   16.06
  -6   6   6   52.52    7.45
  -6   6   7   31.34    6.22
  -6   6   8   76.17    8.77
  -6   6   9   46.32    7.14
  -6   7 -11   77.44   10.80
  -6   7 -10   66.93    9.74
   6   7 -10   75.21   10.14
  -6  -7  -9   81.14    8.45
  -6   7  -9   96.94   11.34
  -6  -7  -8   11.54    4.04
  -6   7  -8   17.21    6.34
  -6   7  -7  111.12   11.64
  -6  -7  -7   93.99    9.24
  -6  -7  -6  324.29   16.59
  -6   7  -6  335.51   19.42
  -6   7  -5   80.48    9.64
  -6  -7  -5   52.53    7.24
  -6   7  -4  457.90   21.98
  -6  -7  -4  405.94   18.63
  -6   7  -3  125.68   11.46
  -6  -7  -3  111.96   10.02
  -6   7  -2  173.64   13.18
  -6  -7  -2  143.93   11.31
  -6  -7  -1  217.54   14.11
  -6   7  -1  235.07   15.34
  -6   7   0    3.07    4.35
  -6  -7   0    6.27    3.75
  -6  -7   1  206.08   13.95
  -6   7   1  188.14   13.53
  -6   7   2  151.34   12.08
  -6  -7   2  162.29   12.75
  -6   7   3  103.12   10.08
  -6   7   4  460.66   20.93
  -6   7   5   76.60    8.73
  -6   7   6  323.62   17.34
  -6   7   7  111.62   10.38
  -6   7   8   20.89    5.45
  -6   7   9   89.01    9.77
  -6   7  10   54.07    7.64
  -6   8 -10  375.41   22.51
   6   8 -10  414.56   23.27
  -6   8  -9   58.34    9.14
  -6  -8  -9   72.60    8.00
  -6  -8  -8  218.58   13.38
  -6   8  -8  245.59   17.29
  -6  -8  -7  246.45   14.37
  -6   8  -7  276.31   17.87
  -6  -8  -6  140.55   11.04
  -6   8  -6  132.84   12.68
  -6  -8  -5  657.87   24.15
  -6   8  -5  686.09   27.64
  -6  -8  -4  350.31   17.36
  -6   8  -4  419.90   21.27
  -6   8  -3  821.38   30.04
  -6  -8  -3  774.77   26.82
  -6   8  -2  659.48   26.24
  -6  -8  -2  639.43   24.20
  -6   8  -1  156.46   12.83
  -6  -8  -1  133.22   11.19
  -6   8   0  421.61   20.59
  -6  -8   0  367.67   18.40
  -6   8   1  132.41   11.79
  -6  -8   1  114.74   10.56
  -6   8   2  631.15   25.02
  -6   8   3  745.49   27.26
  -6   8   4  386.32   19.24
  -6   8   5  660.61   25.25
  -6   8   6  125.26   10.87
  -6   8   7  248.48   15.39
  -6   8   8  214.48   14.19
  -6   8   9   65.64    8.15
  -6   8  10  385.93   19.32
  -6   9  -9   35.10    7.75
   6   9  -9   21.14    5.84
  -6   9  -8   18.18    6.31
  -6  -9  -8   16.03    4.27
  -6   9  -7    4.99    8.61
  -6  -9  -7   22.14    4.86
  -6   9  -6   48.18    8.13
  -6  -9  -6   47.68    6.72
  -6   9  -5   13.17    6.14
  -6  -9  -5    4.47    3.72
  -6   9  -4   70.22    9.42
  -6  -9  -4   64.58    7.83
  -6   9  -3   60.88    8.99
  -6  -9  -3   61.54    7.66
  -6   9  -2    4.16    4.68
  -6  -9  -2    6.43    4.14
  -6   9  -1  117.00   11.28
  -6  -9  -1  100.14    9.86
  -6   9   0   -0.29    4.10
  -6  -9   0    2.76    4.27
  -6   9   1  131.75   11.87
  -6   9   2    6.86    4.49
  -6   9   3   50.17    7.61
  -6   9   4   65.99    8.48
  -6   9   5    9.61    4.90
  -6   9   6   41.71    7.21
  -6   9   7   18.77    5.16
  -6   9   8    9.50    4.48
  -6   9   9   14.67    4.89
  -6   9  10    6.45    5.01
  -6 -10  -8  128.85   10.24
  -6  10  -8  133.00   13.29
   6  10  -8  117.53   12.39
  -6 -10  -7  156.04   11.20
  -6  10  -7  145.79   13.99
  -6 -10  -6  402.75   18.33
  -6  10  -6  448.42   23.37
  -6 -10  -5  450.57   19.67
  -6  10  -5  469.95   23.74
  -6 -10  -4  402.63   18.89
  -6  10  -4  434.29   22.11
  -6 -10  -3  395.78   18.92
  -6  10  -3  462.85   22.74
  -6  10  -2  187.94   14.29
  -6 -10  -2  151.40   11.91
  -6  10  -1  315.90   18.37
  -6  10   0  105.57   10.81
  -6  10   1  311.59   17.81
  -6  10   2  149.77   12.39
  -6  10   3  420.50   20.57
  -6  10   4  434.87   20.86
  -6  10   5  445.78   20.83
  -6  10   6  425.51   20.17
  -6  10   7  152.10   12.26
  -6  10   8  108.93   10.43
  -6  10   9   49.05    7.59
   6  11  -8   79.44   10.81
  -6  11  -8  113.61   12.63
  -6 -11  -7  172.50   11.79
  -6  11  -7  178.31   15.15
   6  11  -7  181.47   15.31
  -6 -11  -6  351.28   17.14
  -6  11  -6  427.70   23.08
  -6 -11  -5  289.09   15.63
  -6  11  -5  280.05   18.68
  -6 -11  -4  193.52   13.09
  -6  11  -4  242.77   16.82
  -6  11  -3  240.12   16.56
  -6  11  -2  229.03   15.99
  -6  11  -1  212.29   15.20
  -6  11   0   72.61    9.40
  -6  11   1  200.35   14.56
  -6  11   2  216.47   15.10
  -6  11   3  240.13   15.61
  -6  11   4  199.50   14.14
  -6  11   5  289.06   16.76
  -6  11   6  399.12   19.80
  -6  11   7  147.15   11.96
  -6  11   8   87.90    9.38
  -6  11   9  137.48   11.45
   6  12  -7    8.74    4.47
  -6  12  -7   11.36    5.74
  -6  12  -6   32.69    7.07
   6  12  -6   45.56    7.90
  -6  12  -5   29.38    6.95
  -6  12  -4   87.55   10.63
  -6  12  -3  120.63   12.52
  -6  12  -2    2.50    4.41
  -6  12  -1   88.89   10.46
  -6  12   0   -4.18    4.77
  -6  12   1   65.97    8.89
  -6  12   2    9.72    4.97
  -6  12   3  125.97   11.55
  -6  12   4   69.90    9.25
  -6  12   5   46.92    7.64
  -6  12   6   48.57    7.61
  -6  12   7   12.70    5.15
  -6  12   8    4.41    4.64
  -6  13  -6  217.56   17.13
   6  13  -6  205.78   16.32
  -6  13  -5  435.36   23.75
   6  13  -5  446.46   23.37
  -6  13  -4  494.52   24.84
  -6  13  -3  348.67   20.45
  -6  13  -2  381.82   21.45
  -6  13  -1  145.36   13.31
  -6  13   0   83.82   10.19
  -6  13   1  151.85   13.34
  -6  13   2  397.94   20.80
  -6  13   3  333.88   18.73
  -6  13   4  419.70   20.89
  -6  13   5  415.26   20.75
  -6  13   6  197.77   14.18
  -6  13   7  251.39   15.84
   6  14  -5   10.54    5.00
  -6  14  -5    2.91    5.33
  -6  14  -4  148.22   14.20
   6  14  -4  131.89   13.03
  -6  14  -3   48.86    8.20
   6  14  -3   46.44    8.02
  -6  14  -2   30.96    7.03
  -6  14  -1   70.25    9.91
  -6  14   0   13.13    5.73
  -6  14   1   55.90    8.79
  -6  14   2   15.78    5.84
  -6  14   3   51.13    8.28
  -6  14   4  134.79   12.12
  -6  14   5   -2.60    4.27
  -6  14   6  188.03   13.84
   6  15  -4  390.54   22.34
   6  15  -3  136.77   13.17
  -6  15  -3  138.52   13.56
  -6  15  -2  119.74   12.51
   6  15  -2   75.72    9.78
   6  15  -1  138.83   12.83
  -6  15  -1  157.73   14.04
  -6  15   0    4.44    4.64
  -6  15   1  174.00   14.30
  -6  15   2   65.51    9.20
  -6  15   3  126.71   12.50
  -6  15   4  409.15   21.18
  -6  15   5  109.10   11.20
  -6  15   6  219.76   15.16
   6  16  -3  284.87   18.84
   6  16  -2  187.17   14.99
  -6  16  -2  195.66   16.01
   6  16  -1  108.90   11.43
  -6  16  -1  119.44   12.49
  -6  16   0  191.63   15.22
   6  16   0  177.83   14.30
  -6  16   1   96.68   11.12
   6  16   1   85.81   10.12
  -6  16   2  183.38   14.82
   6  16   2  177.74   13.56
  -6  16   3  266.11   17.52
   6  16   3  240.90   15.51
  -6  16   4  257.63   17.00
  -6  16   5  214.58   15.33
   6  17  -2   24.55    6.85
   6  17  -1   29.48    6.90
  -6  17  -1   38.66    7.83
   6  17   0   18.31    5.77
  -6  17   0   31.28    7.52
   6  17   1   15.58    5.81
  -6  17   1   16.83    5.57
   6  17   2   13.86    5.05
  -6  17   2   15.50    5.34
  -6  17   3   72.96    9.90
  -6  17   4   33.80    7.02
   6  18  -1   18.73    6.06
   6  18   0  169.21   14.14
   6  18   1   18.98    6.17
  -6  18   1   24.63    7.08
  -6  18   2  149.17   13.93
  -6  18   3  199.35   15.68
  -7   0 -12   10.50    6.09
   7   0 -11    0.86    5.12
  -7   0 -11  -10.03    6.40
   7   0 -10   -0.44    4.42
  -7   0 -10   -0.53    4.31
   7   0  -9    5.13    4.14
  -7   0  -9    0.72    4.49
  -7   0  -8   -2.79    4.76
   7   0  -8   -0.07    4.02
  -7   0  -7    3.81    5.26
   7   0  -7    1.46    3.18
  -7   0  -6    3.99    5.40
   7   0  -6    2.25    2.89
  -7   0  -5   -2.88    4.64
   7   0  -5   -0.75    2.80
  -7   0  -4    0.12    4.28
   7   0  -4   -2.82    2.48
   7   0  -3   -1.03    2.13
  -7   0  -3    2.04    4.43
   7   0  -2    0.05    1.69
  -7   0  -2    2.04    3.96
  -7   0  -1   -7.08    4.95
  -7   0   0    1.58    4.38
  -7   0   1    1.27    4.22
  -7   0   2    5.13    5.05
  -7   0   3   -3.56    4.19
  -7   0   4   -3.68    4.37
  -7   0   5    4.00    4.85
  -7   0   6    5.39    5.45
  -7   0   7   -4.14    4.67
  -7   0   8    0.69    4.08
  -7  -1 -12  238.03   17.43
  -7   1 -11    2.38    4.34
   7  -1 -11    2.75    4.39
  -7  -1 -11    6.41    4.21
   7   1 -11    6.95    5.06
   7   1 -10  292.87   18.33
  -7   1 -10  357.16   20.93
  -7  -1 -10  321.45   19.45
   7  -1 -10  277.92   17.91
   7  -1  -9   86.66    9.80
  -7   1  -9  101.55   11.65
  -7  -1  -9  113.50   12.18
   7   1  -9   86.49    9.98
  -7   1  -8  492.95   24.44
  -7  -1  -8  509.53   24.40
   7  -1  -8  508.74   21.77
   7   1  -8  510.38   22.11
  -7   1  -7  230.32   16.40
   7  -1  -7  204.66   13.04
  -7  -1  -7  207.71   15.26
   7   1  -7  233.15   14.12
  -7   1  -6  779.07   30.30
   7  -1  -6  795.60   25.05
  -7  -1  -6  739.66   29.41
   7   1  -6  820.22   25.88
   7  -1  -5   22.55    4.42
   7   1  -5   36.94    5.30
  -7   1  -5   32.94    7.16
  -7  -1  -5   26.18    6.53
  -7   1  -4  760.79   29.44
  -7  -1  -4  770.79   29.59
   7  -1  -4  787.41   22.03
   7   1  -4  788.65   22.82
   7  -1  -3   11.27    2.82
   7   1  -3    8.48    2.82
  -7   1  -3   13.47    5.20
  -7  -1  -3   13.54    5.69
  -7   1  -2  453.72   22.59
  -7  -1  -2  461.11   22.17
   7   1  -2  457.99   14.23
  -7  -1  -1   63.09    8.74
  -7   1  -1   69.33    9.30
  -7   1   0  513.10   23.53
  -7  -1   0  540.88   23.96
  -7   1   1   51.31    8.58
  -7  -1   1   61.45    8.90
  -7   1   2  494.31   23.20
  -7  -1   2  490.22   23.01
  -7   1   3    6.99    4.65
  -7  -1   3   18.81    6.12
  -7  -1   4  756.14   29.37
  -7   1   4  755.59   29.25
  -7   1   5   32.13    7.20
  -7  -1   5   35.68    7.51
  -7   1   6  766.31   30.10
  -7  -1   6  737.98   29.39
  -7   1   7  210.08   15.98
  -7  -1   7  232.62   16.67
  -7   1   8  473.77   23.65
   7  -2 -11   94.02   11.00
  -7   2 -11  104.29   11.90
   7   2 -11   89.10   11.04
  -7  -2 -11   74.61    9.95
  -7   2 -10   28.26    7.56
   7   2 -10   20.94    6.82
  -7  -2 -10   23.24    6.96
   7  -2 -10   28.42    7.11
  -7   2  -9   68.06    9.25
   7   2  -9   76.19    9.40
  -7  -2  -9   83.25   10.23
   7  -2  -9   69.44    9.00
   7   2  -8   51.26    7.72
  -7   2  -8   41.94    7.98
  -7  -2  -8   45.90    7.93
   7  -2  -8   46.64    6.98
  -7   2  -7  586.08   26.57
  -7  -2  -7  548.72   24.95
   7  -2  -7  544.31   21.38
   7   2  -7  544.35   22.12
   7  -2  -6   70.92    7.47
   7   2  -6   69.62    7.63
  -7   2  -6   85.87   10.58
  -7  -2  -6   75.72    9.43
  -7   2  -5  783.56   30.64
  -7  -2  -5  786.45   29.68
   7   2  -5  804.02   24.84
   7  -2  -5  814.18   23.78
   7  -2  -4    7.45    2.79
   7   2  -4   14.88    3.97
  -7   2  -4   13.44    5.55
  -7  -2  -4   27.29    6.61
  -7   2  -3  249.95   16.84
  -7  -2  -3  262.81   16.52
  -7  -2  -2   24.21    6.34
  -7   2  -2   48.23    8.26
  -7   2  -1  212.91   15.21
  -7  -2  -1  205.70   14.71
   7   2  -1  210.73    8.83
  -7  -2   0   28.62    6.38
  -7   2   0   28.75    6.68
  -7   2   1  229.61   15.70
  -7  -2   1  224.71   15.58
  -7   2   2   21.02    5.48
  -7  -2   2   21.55    6.12
  -7   2   3  253.58   16.69
  -7  -2   3  282.84   17.80
  -7   2   4    3.67    4.77
  -7  -2   4    9.69    5.39
  -7  -2   5  774.06   30.44
  -7   2   5  844.17   31.11
  -7   2   6   75.73    9.85
  -7  -2   6   73.37    9.60
  -7   2   7  517.60   24.35
  -7   2   8   52.84    8.46
   7   3 -11   -1.19    5.01
  -7  -3 -11    3.22    7.22
   7  -3 -11    0.74    4.72
  -7   3 -10  210.76   16.62
  -7  -3 -10  217.50   15.95
   7  -3 -10  197.34   14.95
   7   3 -10  207.26   15.85
   7   3  -9   57.72    8.58
  -7   3  -9   41.13    7.96
   7  -3  -9   46.29    7.61
  -7  -3  -9   53.74    8.69
   7   3  -8   94.04    9.94
  -7   3  -8  115.79   12.54
  -7  -3  -8   80.09   10.02
   7  -3  -8   97.48    9.60
   7  -3  -7   19.95    4.68
  -7   3  -7   43.96    8.41
  -7  -3  -7   20.34    6.26
  -7   3  -6   12.87    5.53
   7  -3  -6   14.15    3.64
  -7  -3  -6   15.11    5.81
  -7   3  -5   13.96    6.37
  -7  -3  -5   23.47    6.25
  -7  -3  -4   16.28    5.55
  -7   3  -4   29.08    6.78
  -7  -3  -3   10.49    5.57
  -7   3  -3    5.13    5.13
  -7   3  -2  309.05   18.45
  -7  -3  -2  306.96   18.13
  -7  -3  -1   52.56    8.14
  -7   3  -1   60.07    8.81
  -7   3   0  330.08   19.09
  -7  -3   0  349.25   19.12
  -7  -3   1   53.68    8.19
  -7   3   1   34.40    6.91
  -7   3   2  312.68   18.31
  -7  -3   2  279.10   17.54
  -7   3   3   12.24    5.26
  -7  -3   3   12.44    5.62
  -7   3   4   37.55    7.20
  -7  -3   4   38.39    7.24
  -7   3   5    8.10    5.40
  -7  -3   5   26.44    6.82
  -7   3   6   23.49    6.90
  -7  -3   6    9.05    4.89
  -7   3   7   30.18    7.10
  -7   3   8   84.04   10.35
  -7   3   9   35.34    7.54
   7  -4 -11  349.85   20.50
   7   4 -11  357.42   21.21
   7  -4 -10   17.39    5.88
   7   4 -10   17.00    6.51
  -7  -4 -10   26.38    6.70
  -7   4  -9  663.34   29.76
   7  -4  -9  674.59   26.40
  -7  -4  -9  642.10   27.00
  -7   4  -8   91.80   11.54
  -7  -4  -8   74.89    9.44
  -7   4  -7  529.09   25.63
  -7  -4  -7  481.09   22.71
  -7   4  -6   40.89    8.05
  -7  -4  -6   31.35    6.94
  -7   4  -5  493.63   24.07
  -7  -4  -5  411.09   20.88
  -7  -4  -4   29.42    6.66
  -7   4  -4   11.99    5.84
  -7   4  -3  754.13   30.06
  -7  -4  -3  709.25   27.80
  -7  -4  -2  112.27   11.26
  -7   4  -2  116.11   11.92
  -7   4  -1 1123.45   36.27
  -7  -4  -1  987.61   33.83
  -7   4   0  340.98   19.44
  -7  -4   0  328.39   19.00
  -7   4   1 1091.21   35.69
  -7  -4   1 1054.24   35.10
  -7  -4   2  115.33   11.63
  -7   4   2  115.79   11.63
  -7  -4   3  788.29   30.16
  -7   4   3  785.19   29.91
  -7   4   4   10.72    5.15
  -7  -4   4   19.12    6.21
  -7  -4   5  430.00   22.48
  -7   4   5  428.97   21.99
  -7   4   6   28.08    6.57
  -7   4   7  503.22   24.00
  -7   4   8   86.36   10.70
  -7   4   9  660.62   28.06
  -7  -5 -10   12.36    5.16
  -7   5  -9   36.97    7.75
  -7  -5  -9   22.61    6.47
  -7  -5  -8   76.56    9.45
  -7   5  -8  106.19   12.06
  -7  -5  -7   -0.50    4.55
  -7   5  -7    3.91    5.02
  -7  -5  -6   31.72    6.72
  -7   5  -6   43.44    8.00
  -7  -5  -5   11.86    5.38
  -7   5  -5    6.48    5.11
  -7  -5  -4   69.44    8.80
  -7   5  -4   87.62   10.73
  -7  -5  -3   53.85    8.37
  -7   5  -3   53.35    8.66
  -7  -5  -2   22.43    6.24
  -7   5  -2   28.69    6.85
  -7  -5  -1   24.10    6.46
  -7   5  -1   40.59    7.52
  -7  -5   0   74.69    9.51
  -7   5   0   83.14   10.28
  -7  -5   1   21.31    6.14
  -7   5   1   27.63    6.72
  -7  -5   2   64.20    9.33
  -7   5   2   39.90    7.25
  -7   5   3   62.21    8.98
  -7  -5   3   57.10    8.76
  -7   5   4   79.10   10.01
  -7  -5   4   88.75   10.73
  -7   5   5    8.87    5.73
  -7   5   6   36.00    7.16
  -7   5   7    7.10    4.30
  -7   5   8   53.05    8.52
  -7   5   9   25.33    6.81
  -7  -6  -9  465.04   22.22
  -7  -6  -8   26.18    6.40
  -7   6  -8   31.71    7.68
  -7   6  -7  314.26   20.13
  -7  -6  -7  282.31   17.19
  -7  -6  -6   67.28    9.13
  -7   6  -6   59.10    9.45
  -7   6  -5  195.69   17.24
  -7  -6  -5  137.06   12.17
  -7  -6  -4    7.00    4.21
  -7   6  -4   17.59    6.33
  -7   6  -3  476.83   23.91
  -7  -6  -3  417.38   21.04
  -7  -6  -2   73.58    9.21
  -7   6  -2   62.57    9.24
  -7   6  -1  653.65   27.59
  -7  -6  -1  618.68   26.03
  -7  -6   0  112.76   11.75
  -7   6   0  147.10   12.88
  -7  -6   1  645.83   26.83
  -7   6   1  635.44   27.09
  -7  -6   2   72.64    9.58
  -7   6   2   82.27   10.04
  -7  -6   3  484.63   23.54
  -7   6   3  467.03   22.78
  -7   6   4   20.03    5.81
  -7  -6   4   16.25    5.88
  -7   6   5  137.34   12.56
  -7   6   6   63.95    9.12
  -7   6   7  277.16   17.65
  -7   6   8   16.15    5.46
  -7   6   9  452.41   22.84
  -7   6  10   49.06    8.10
  -7  -7  -9   50.09    7.96
  -7  -7  -8  322.84   18.31
  -7  -7  -7   24.64    6.27
  -7   7  -7   30.48    7.32
  -7   7  -6  149.05   13.90
  -7  -7  -6  125.48   11.57
  -7   7  -5   15.35    6.31
  -7  -7  -5   15.44    5.60
  -7   7  -4  138.69   13.68
  -7  -7  -4  141.06   12.32
  -7  -7  -3    2.79    4.82
  -7   7  -3   10.10    5.86
  -7  -7  -2  568.61   24.74
  -7   7  -2  605.28   27.01
  -7  -7  -1  117.46   11.49
  -7   7  -1  110.75   11.73
  -7  -7   0  978.22   33.80
  -7   7   0 1015.33   35.34
  -7  -7   1  110.87   11.44
  -7   7   1  121.23   12.01
  -7  -7   2  562.34   25.32
  -7   7   2  560.41   25.43
  -7  -7   3   16.42    5.77
  -7   7   3   18.62    6.09
  -7   7   4  133.32   12.46
  -7   7   5    8.98    4.56
  -7   7   6  153.28   13.44
  -7   7   7   18.92    5.95
  -7   7   8  323.60   19.42
  -7   7   9   33.79    7.11
  -7   7  10  352.82   20.30
  -7  -8  -8   20.03    6.07
  -7  -8  -7   60.45    8.40
  -7   8  -6   23.83    6.52
  -7  -8  -6   27.92    6.30
  -7   8  -5   74.03   10.30
  -7  -8  -5   86.18    9.78
  -7   8  -4    7.88    5.18
  -7  -8  -4    5.83    3.95
  -7   8  -3  106.10   11.96
  -7  -8  -3   76.02    9.22
  -7   8  -2   44.92    8.19
  -7  -8  -2   38.35    7.64
  -7   8  -1   54.71    8.77
  -7  -8  -1   43.44    7.68
  -7  -8   0   30.01    6.87
  -7   8   0   22.91    7.15
  -7  -8   1   45.69    8.18
  -7   8   1   53.88    8.81
  -7   8   2   32.34    7.15
  -7   8   3   78.50   10.00
  -7   8   4    1.75    4.58
  -7   8   5   81.62   10.28
  -7   8   6   13.50    5.33
  -7   8   7   42.71    7.84
  -7   8   8    2.64    4.38
  -7   8   9   12.00    5.63
  -7   8  10   25.52    7.03
  -7  -9  -7   60.73    8.35
  -7   9  -6  516.60   26.57
  -7  -9  -6  458.67   21.87
  -7   9  -5   24.13    7.22
  -7  -9  -5   14.89    5.62
  -7   9  -4  273.89   18.66
  -7  -9  -4  205.28   14.70
  -7   9  -3  113.84   12.59
  -7  -9  -3  109.06   11.20
  -7   9  -2  643.46   28.43
  -7  -9  -2  585.33   25.47
  -7   9  -1   94.24   11.09
  -7  -9  -1   75.51    9.67
  -7   9   0  757.09   30.39
  -7  -9   0  710.53   28.74
  -7   9   1   97.76   11.43
  -7   9   2  639.48   27.50
  -7   9   3  120.46   12.03
  -7   9   4  223.04   16.19
  -7   9   5   23.60    6.78
  -7   9   6  471.82   23.22
  -7   9   7   56.00    8.64
  -7   9   8  397.06   21.28
  -7   9   9   72.81    9.48
  -7 -10  -7   75.91    9.35
  -7 -10  -6   -3.27    5.20
  -7 -10  -5   66.85    8.77
  -7  10  -4   10.58    6.32
  -7 -10  -4    2.34    4.21
  -7  10  -3   75.05   10.02
  -7 -10  -3   99.59   10.53
  -7  10  -2   23.48    6.83
  -7 -10  -2   10.53    4.85
  -7  10  -1  301.98   19.56
  -7  10   0   10.36    6.58
  -7  10   1  283.81   18.57
  -7  10   2   18.54    6.48
  -7  10   3  102.25   11.60
  -7  10   4    7.24    5.58
  -7  10   5   61.29    9.20
  -7  10   6   -1.43    4.83
  -7  10   7   97.08   10.47
  -7  10   8   19.69    6.02
  -7  10   9  243.92   16.61
  -7 -11  -6  268.93   16.46
  -7 -11  -5   24.82    6.28
  -7 -11  -4  262.07   16.62
  -7  11  -3   23.37    6.84
  -7  11  -2  140.07   14.05
  -7  11  -1   37.50    8.14
  -7  11   0   10.24    5.03
  -7  11   1   49.71    8.75
  -7  11   2  147.93   13.91
  -7  11   3   20.99    6.43
  -7  11   4  280.83   18.30
  -7  11   5   27.21    6.87
  -7  11   6  257.33   17.44
  -7  11   7   34.63    7.73
  -7  11   8  110.08   11.72
  -7  12  -2   22.74    7.09
  -7  12  -1  347.62   21.42
  -7  12   0   26.46    6.77
  -7  12   1  338.58   20.72
  -7  12   2   28.60    7.19
  -7  12   3  438.98   23.28
  -7  12   4   19.66    6.53
  -7  12   5  480.37   23.91
  -7  12   6   51.22    8.32
  -7  12   7  531.95   25.11
  -7  13   0   14.77    6.32
  -7  13   1   23.85    6.96
  -7  13   2   16.07    6.32
  -7  13   3    3.58    4.37
  -7  13   4   29.61    6.98
  -7  13   5   13.65    5.32
  -7  13   6   35.25    7.53
  -7  14   1  425.05   23.94
  -7  14   2   61.87    9.84
  -7  14   3  395.97   22.29
  -7  14   4   21.57    6.21
  -7  14   5  231.73   16.83
  -7  14   6   53.00    9.06
  -7  15   4  236.21   17.53
  -8   0  -6  156.03   14.90
  -8   0  -5  258.16   18.39
  -8   0  -4  140.62   13.94
  -8   0  -3  177.94   15.28
  -8   0  -2  276.15   18.72
  -8   0  -1  436.98   23.67
  -8   0   0  160.80   14.84
  -8   0   1  422.62   23.28
  -8   0   2  258.96   18.55
  -8   0   3  207.84   16.34
  -8   0   4  170.35   15.05
  -8   0   5  241.16   18.05
  -8  -1  -7   60.38    9.58
  -8   1  -6   60.66   10.32
  -8  -1  -6   53.20    8.86
  -8   1  -5   21.11    6.65
  -8  -1  -5   10.19    5.22
  -8   1  -4   35.79    7.44
  -8  -1  -4   42.72    7.92
  -8  -1  -3  127.91   13.14
  -8   1  -3  120.98   12.69
  -8  -1  -2   25.26    6.44
  -8   1  -2   27.61    6.86
  -8   1  -1   44.02    8.83
  -8  -1  -1   31.62    7.42
  -8   1   0   80.30   10.52
  -8  -1   0   90.40   11.01
  -8   1   1   29.27    6.92
  -8  -1   1   33.97    8.30
  -8   1   2   34.86    7.86
  -8  -1   2   23.40    6.94
  -8   1   3  139.45   13.69
  -8  -1   3  159.08   14.35
  -8   1   4   38.17    7.84
  -8  -1   4   37.14    8.50
  -8   1   5   15.93    6.01
  -8  -2  -7  148.87   14.06
  -8  -2  -6   13.92    5.60
  -8   2  -5  155.25   14.61
  -8  -2  -5  153.30   14.01
  -8  -2  -4   12.96    5.84
  -8   2  -4    1.98    4.87
  -8  -2  -3  126.52   12.93
  -8   2  -3  156.59   14.28
  -8   2  -2  156.83   14.35
  -8  -2  -2  137.63   13.37
  -8   2  -1  219.47   16.71
  -8  -2  -1  189.25   15.52
  -8   2   0  172.37   14.91
  -8  -2   0  183.64   15.81
  -8   2   1  229.23   17.25
  -8  -2   1  218.73   16.79
  -8   2   2  140.38   13.78
  -8  -2   2  162.46   14.71
  -8  -2   3  152.83   14.21
  -8   2   3  163.25   14.99
  -8   2   4   14.01    6.14
  -8  -2   4    7.31    4.87
  -8   2   5  177.99   15.32
  -8  -3  -8  205.75   16.51
  -8  -3  -7  168.39   14.82
  -8  -3  -6  208.07   16.23
  -8  -3  -5   48.67    8.38
  -8   3  -4  404.92   23.48
  -8  -3  -4  397.37   22.44
  -8  -3  -3   65.86    9.57
  -8   3  -3   85.94   10.97
  -8   3  -2  272.58   18.98
  -8  -3  -2  282.58   19.20
  -8   3  -1  154.24   14.55
  -8  -3  -1  137.29   13.78
  -8   3   0  400.10   22.82
  -8  -3   0  378.87   21.93
  -8   3   1  149.71   14.10
  -8  -3   1  139.76   13.79
  -8  -3   2  310.79   19.81
  -8   3   2  264.29   18.70
  -8   3   3   89.38   11.26
  -8  -3   3   92.53   11.43
  -8  -3   4  365.31   22.13
  -8   3   4  420.23   23.47
  -8   3   5   48.53    9.15
  -8  -4  -8   81.79   10.41
  -8  -4  -7    0.60    4.36
  -8  -4  -6   40.87    7.87
  -8  -4  -5   -2.21    5.17
  -8  -4  -4    3.39    4.33
  -8  -4  -3   52.54    8.98
  -8   4  -3   28.98    6.82
  -8  -4  -2   19.80    6.36
  -8   4  -2   47.15    8.76
  -8  -4  -1    8.96    6.02
  -8   4  -1   15.34    6.59
  -8  -4   0   90.50   11.25
  -8   4   0  124.27   12.99
  -8   4   1   13.23    5.83
  -8  -4   1   -0.80    4.00
  -8   4   2   52.22    9.17
  -8  -4   2   44.38    8.82
  -8   4   3   57.23    9.03
  -8  -4   3   59.12    9.81
  -8   4   4    4.55    4.90
  -8   4   5    3.10    5.34
  -8  -5  -8  355.15   21.36
  -8  -5  -7  154.50   13.98
  -8  -5  -6  219.90   16.61
  -8  -5  -5   12.60    5.70
  -8  -5  -4  236.65   17.13
  -8  -5  -3   47.42    8.86
  -8   5  -2  407.42   23.55
  -8  -5  -2  344.27   20.91
  -8   5  -1  247.54   18.18
  -8  -5  -1  245.86   17.74
  -8  -5   0  433.03   23.73
  -8   5   0  442.47   24.18
  -8  -5   1  230.69   17.56
  -8   5   1  230.84   17.26
  -8  -5   2  393.72   22.61
  -8   5   2  441.54   24.10
  -8   5   3   31.34    7.12
  -8   5   4  235.94   17.65
  -8  -6  -8   93.77   11.44
  -8  -6  -7  136.68   13.53
  -8  -6  -6    6.80    4.74
  -8  -6  -5   22.49    6.51
  -8  -6  -4   -4.06    5.14
  -8  -6  -3   95.53   11.24
  -8  -6  -2   62.48    9.34
  -8  -6  -1  148.08   13.90
  -8   6  -1  166.56   15.11
  -8  -6   0  105.09   12.35
  -8   6   0  126.61   13.29
  -8  -6   1  131.48   13.57
  -8   6   1  125.99   13.05
  -8  -6   2   75.17   10.87
  -8   6   2   61.11    9.68
  -8   6   3  128.05   13.40
  -8   6   4   -2.28    5.26
  -8  -7  -7   36.33    7.27
  -8  -7  -6  136.68   13.43
  -8  -7  -5    7.73    4.79
  -8  -7  -4   54.64    9.14
  -8  -7  -3   23.71    6.53
  -8  -7  -2   73.43   10.53
  -8  -7  -1   89.65   11.17
  -8  -7   0   81.19   10.65
  -8  -7   1   76.39   10.85
  -8  -8  -7  272.24   18.44
  -8  -8  -6    9.04    4.93
  -8  -8  -5  297.25   19.05
  -8  -8  -4   35.46    7.83
  -8  -8  -3  223.24   16.75
  -8  -8  -2   95.60   11.53
  -8  -8  -1  251.23   17.89
  -8  -8   0  519.28   26.15
  -8  -9  -6    9.85    5.35
  -8  -9  -5    5.61    4.83
  -8  -9  -4   24.40    6.79
  -8  -9  -3   26.77    6.73
  -8  -9  -2   26.82    6.96
  -8  -9  -1   72.31   10.36
  -8 -10  -5  162.66   14.38
  -8 -10  -4   23.25    7.00
  -8 -10  -3  107.76   11.98
  -8 -11  -4  150.67   14.23
   0   0   0    0.00    0.00


TITL mvv571 in Pna2(1)
REM Pna2(1) (#33, found as Pn2(1)a in a-cb setting)
CELL 0.71073   6.832035  18.205115  13.636085  90.0000  90.0000  90.0000
ZERR    3.00   0.000280   0.000753   0.000493   0.0000   0.0000   0.0000
LATT -1
SYMM -x,-y, z+1/2
SYMM  x+1/2,-y+1/2, z
SYMM -x+1/2, y+1/2, z+1/2
SFAC C H N O Cl Ru
UNIT 75.00 90.00 12.00 3.00 3.00 3.00
TREF
HKLF 4
END
_computing_structure_solution     'SHELXT 2014/5 (Sheldrick, 2014)'
;
_shelx_hkl_checksum   19048
